# Supplementary material for: Late Embryogenesis Abundant (LEA)5 Regulates Translation in Mitochondria and Chloroplasts to Enhance Growth and Stress Tolerance
Source: PubMed Central journal article supplement (PMC9244843; doi:10.3389/fpls.2022.875799), 2022-06-16
Supplement: Table_1.pdf [file Table_1.pdf]

|        |    |            |           |                                                   |     |
|--------|----|------------|-----------|---------------------------------------------------|-----|
| Dark-1 | 37 | Background | AT2G20580 | Symbols: RPN1A, ATRPN1A   26S proteasome re       | 247 |
| Dark-1 | 37 | Background | AT2G20580 | Symbols: RPN1A, ATRPN1A   26S proteasome re       | 247 |
| Dark-1 | 37 | Background | AT2G20580 | Symbols: RPN1A, ATRPN1A   26S proteasome re       | 247 |
| Dark-1 | 38 | Background | AT1G69840 | Symbols:   SPFH/Band 7/PHB domain-containin       | 241 |
| Dark-1 | 38 | Background | AT1G69840 | Symbols:   SPFH/Band 7/PHB domain-containin       | 241 |
| Dark-1 | 38 | Background | AT1G69840 | Symbols:   SPFH/Band 7/PHB domain-containin       | 241 |
| Dark-1 | 38 | Background | AT1G69840 | Symbols:   SPFH/Band 7/PHB domain-containin       | 241 |
| Dark-1 | 38 | Background | AT1G69840 | Symbols:   SPFH/Band 7/PHB domain-containin       | 241 |
| Dark-1 | 38 | Background | AT1G69840 | Symbols:   SPFH/Band 7/PHB domain-containin       | 241 |
| Dark-1 | 39 | Background | AT3G56150 | Symbols: EIF3C, ATEIF3C-1, EIF3C-1, ATTIF3C1, T   | 241 |
| Dark-1 | 39 | Background | AT3G56150 | Symbols: EIF3C, ATEIF3C-1, EIF3C-1, ATTIF3C1, T   | 241 |
| Dark-1 | 39 | Background | AT3G56150 | Symbols: EIF3C, ATEIF3C-1, EIF3C-1, ATTIF3C1, T   | 241 |
| Dark-1 | 39 | Background | AT3G56150 | Symbols: EIF3C, ATEIF3C-1, EIF3C-1, ATTIF3C1, T   | 241 |
| Dark-1 | 40 | Background | AT3G63460 | Symbols:   transducin family protein / WD-40 re   | 236 |
| Dark-1 | 40 | Background | AT3G63460 | Symbols:   transducin family protein / WD-40 re   | 236 |
| Dark-1 | 40 | Background | AT3G63460 | Symbols:   transducin family protein / WD-40 re   | 236 |
| Dark-1 | 40 | Background | AT3G63460 | Symbols:   transducin family protein / WD-40 re   | 236 |
| Dark-1 | 40 | Background | AT3G63460 | Symbols:   transducin family protein / WD-40 re   | 236 |
| Dark-1 | 40 | Background | AT3G63460 | Symbols:   transducin family protein / WD-40 re   | 236 |
| Dark-1 | 40 | Background | AT3G63460 | Symbols:   transducin family protein / WD-40 re   | 236 |
| Dark-1 | 41 | Background | AT2G31610 | Symbols:   Ribosomal protein S3 family protein    | 220 |
| Dark-1 | 41 | Background | AT2G31610 | Symbols:   Ribosomal protein S3 family protein    | 220 |
| Dark-1 | 41 | Background | AT2G31610 | Symbols:   Ribosomal protein S3 family protein    | 220 |
| Dark-1 | 42 | Background | AT4G02930 | Symbols:   GTP binding Elongation factor Tu fan   | 219 |
| Dark-1 | 42 | Background | AT4G02930 | Symbols:   GTP binding Elongation factor Tu fan   | 219 |
| Dark-1 | 42 | Background | AT4G02930 | Symbols:   GTP binding Elongation factor Tu fan   | 219 |
| Dark-1 | 42 | Background | AT4G02930 | Symbols:   GTP binding Elongation factor Tu fan   | 219 |
| Dark-1 | 43 | Background | AT5G62190 | Symbols: PRH75   DEAD box RNA helicase (PRH7      | 217 |
| Dark-1 | 43 | Background | AT5G62190 | Symbols: PRH75   DEAD box RNA helicase (PRH7      | 217 |
| Dark-1 | 43 | Background | AT5G62190 | Symbols: PRH75   DEAD box RNA helicase (PRH7      | 217 |
| Dark-1 | 44 | Background | AT1G55490 | Symbols: CPN60B, LEN1   chaperonin 60 beta        | 215 |
| Dark-1 | 44 | Background | AT1G55490 | Symbols: CPN60B, LEN1   chaperonin 60 beta        | 215 |
| Dark-1 | 44 | Background | AT1G55490 | Symbols: CPN60B, LEN1   chaperonin 60 beta        | 215 |
| Dark-1 | 44 | Background | AT1G55490 | Symbols: CPN60B, LEN1   chaperonin 60 beta        | 215 |
| Dark-1 | 44 | Background | AT1G55490 | Symbols: CPN60B, LEN1   chaperonin 60 beta        | 215 |
| Dark-1 | 45 | Background | AT2G17130 | Symbols: IDH2, IDH-II   isocitrate dehydrogenase  | 212 |
| Dark-1 | 45 | Background | AT2G17130 | Symbols: IDH2, IDH-II   isocitrate dehydrogenase  | 212 |
| Dark-1 | 45 | Background | AT2G17130 | Symbols: IDH2, IDH-II   isocitrate dehydrogenase  | 212 |
| Dark-1 | 45 | Background | AT2G17130 | Symbols: IDH2, IDH-II   isocitrate dehydrogenase  | 212 |
| Dark-1 | 45 | Background | AT2G17130 | Symbols: IDH2, IDH-II   isocitrate dehydrogenase  | 212 |
| Dark-1 | 46 | Background | AT2G46520 | Symbols:   cellular apoptosis susceptibility prot | 207 |
| Dark-1 | 46 | Background | AT2G46520 | Symbols:   cellular apoptosis susceptibility prot | 207 |
| Dark-1 | 46 | Background | AT2G46520 | Symbols:   cellular apoptosis susceptibility prot | 207 |
| Dark-1 | 47 | Background | AT2G37270 | Symbols: ATRPS5B, RPS5B   ribosomal protein 5     | 206 |
| Dark-1 | 47 | Background | AT2G37270 | Symbols: ATRPS5B, RPS5B   ribosomal protein 5     | 206 |
| Dark-1 | 47 | Background | AT2G37270 | Symbols: ATRPS5B, RPS5B   ribosomal protein 5     | 206 |
| Dark-1 | 47 | Background | AT2G37270 | Symbols: ATRPS5B, RPS5B   ribosomal protein 5     | 206 |
| Dark-1 | 48 | Background | AT1G72370 | Symbols: P40, AP40, RP40, RPSAA   40s ribosom     | 205 |
| Dark-1 | 48 | Background | AT1G72370 | Symbols: P40, AP40, RP40, RPSAA   40s ribosom     | 205 |
| Dark-1 | 48 | Background | AT1G72370 | Symbols: P40, AP40, RP40, RPSAA   40s ribosom     | 205 |
| Dark-1 | 48 | Background | AT1G72370 | Symbols: P40, AP40, RP40, RPSAA   40s ribosom     | 205 |
| Dark-1 | 49 | Background | AT5G56500 | Symbols:   TCP-1/cpn60 chaperonin family prot     | 203 |
| Dark-1 | 49 | Background | AT5G56500 | Symbols:   TCP-1/cpn60 chaperonin family prot     | 203 |
| Dark-1 | 49 | Background | AT5G56500 | Symbols:   TCP-1/cpn60 chaperonin family prot     | 203 |
| Dark-1 | 49 | Background | AT5G56500 | Symbols:   TCP-1/cpn60 chaperonin family prot     | 203 |
| Dark-1 | 50 | Background | AT1G56070 | Symbols: LOS1   Ribosomal protein S5/Elongatic    | 202 |
| Dark-1 | 50 | Background | AT1G56070 | Symbols: LOS1   Ribosomal protein S5/Elongatic    | 202 |
| Dark-1 | 50 | Background | AT1G56070 | Symbols: LOS1   Ribosomal protein S5/Elongatic    | 202 |

|        |    |                 |           |                                                  |     |
|--------|----|-----------------|-----------|--------------------------------------------------|-----|
| Dark-1 | 50 | Background      | AT1G56070 | Symbols: LOS1   Ribosomal protein S5/Elongatic   | 202 |
| Dark-1 | 51 | Background      | AT3G22310 | Symbols: PMH1, ATRH9   putative mitochondria     | 200 |
| Dark-1 | 51 | Background      | AT3G22310 | Symbols: PMH1, ATRH9   putative mitochondria     | 200 |
| Dark-1 | 51 | Background      | AT3G22310 | Symbols: PMH1, ATRH9   putative mitochondria     | 200 |
| Dark-1 | 51 | Background      | AT3G22310 | Symbols: PMH1, ATRH9   putative mitochondria     | 200 |
| Dark-1 | 51 | Background      | AT3G22310 | Symbols: PMH1, ATRH9   putative mitochondria     | 200 |
| Dark-1 | 51 | Background      | AT3G22310 | Symbols: PMH1, ATRH9   putative mitochondria     | 200 |
| Dark-1 | 51 | Background      | AT3G22310 | Symbols: PMH1, ATRH9   putative mitochondria     | 200 |
| Dark-1 | 51 | Background      | AT3G22310 | Symbols: PMH1, ATRH9   putative mitochondria     | 200 |
| Dark-1 | 52 | Background      | AT2G21390 | Symbols:   Coatomer, alpha subunit   chr2:915:   | 199 |
| Dark-1 | 52 | Background      | AT2G21390 | Symbols:   Coatomer, alpha subunit   chr2:915:   | 199 |
| Dark-1 | 52 | Background      | AT2G21390 | Symbols:   Coatomer, alpha subunit   chr2:915:   | 199 |
| Dark-1 | 52 | Background      | AT2G21390 | Symbols:   Coatomer, alpha subunit   chr2:915:   | 199 |
| Dark-1 | 52 | Background      | AT2G21390 | Symbols:   Coatomer, alpha subunit   chr2:915:   | 199 |
| Dark-1 | 53 | Background      | AT2G20140 | Symbols:   AAA-type ATPase family protein   ch   | 199 |
| Dark-1 | 53 | Background      | AT2G20140 | Symbols:   AAA-type ATPase family protein   ch   | 199 |
| Dark-1 | 54 | Background      | AT2G16950 | Symbols: TRN1, ATTRN1   transportin 1   chr2:7   | 197 |
| Dark-1 | 54 | Background      | AT2G16950 | Symbols: TRN1, ATTRN1   transportin 1   chr2:7   | 197 |
| Dark-1 | 54 | Background      | AT2G16950 | Symbols: TRN1, ATTRN1   transportin 1   chr2:7   | 197 |
| Dark-1 | 55 | Background      | AT5G13490 | Symbols: AAC2   ADP/ATP carrier 2   chr5:43360   | 191 |
| Dark-1 | 55 | Background      | AT5G13490 | Symbols: AAC2   ADP/ATP carrier 2   chr5:43360   | 191 |
| Dark-1 | 55 | Background      | AT5G13490 | Symbols: AAC2   ADP/ATP carrier 2   chr5:43360   | 191 |
| Dark-1 | 55 | Background      | AT5G13490 | Symbols: AAC2   ADP/ATP carrier 2   chr5:43360   | 191 |
| Dark-1 | 55 | Background      | AT5G13490 | Symbols: AAC2   ADP/ATP carrier 2   chr5:43360   | 191 |
| Dark-1 | 55 | Background      | AT5G13490 | Symbols: AAC2   ADP/ATP carrier 2   chr5:43360   | 191 |
| Dark-1 | 55 | Background      | AT5G13490 | Symbols: AAC2   ADP/ATP carrier 2   chr5:43360   | 191 |
| Dark-1 | 56 | Background      | AT1G33120 | Symbols:   Ribosomal protein L6 family   chr1:1  | 187 |
| Dark-1 | 56 | Background      | AT1G33120 | Symbols:   Ribosomal protein L6 family   chr1:1  | 187 |
| Dark-1 | 56 | Background      | AT1G33120 | Symbols:   Ribosomal protein L6 family   chr1:1  | 187 |
| Dark-1 | 56 | Background      | AT1G33120 | Symbols:   Ribosomal protein L6 family   chr1:1  | 187 |
| Dark-1 | 56 | Background      | AT1G33120 | Symbols:   Ribosomal protein L6 family   chr1:1  | 187 |
| Dark-1 | 57 | Background      | AT1G43800 | Symbols:   Plant stearyl-acyl-carrier-protein de | 186 |
| Dark-1 | 57 | Background      | AT1G43800 | Symbols:   Plant stearyl-acyl-carrier-protein de | 186 |
| Dark-1 | 57 | Background      | AT1G43800 | Symbols:   Plant stearyl-acyl-carrier-protein de | 186 |
| Dark-1 | 57 | Background      | AT1G43800 | Symbols:   Plant stearyl-acyl-carrier-protein de | 186 |
| Dark-1 | 57 | Background      | AT1G43800 | Symbols:   Plant stearyl-acyl-carrier-protein de | 186 |
| Dark-1 | 58 | Background      | AT5G08670 | Symbols:   ATP synthase alpha/beta family prot   | 185 |
| Dark-1 | 58 | Background      | AT5G08670 | Symbols:   ATP synthase alpha/beta family prot   | 185 |
| Dark-1 | 58 | Background      | AT5G08670 | Symbols:   ATP synthase alpha/beta family prot   | 185 |
| Dark-1 | 59 | Background      | AT2G07698 | Symbols:   ATPase, F1 complex, alpha subunit p   | 179 |
| Dark-1 | 59 | Background      | AT2G07698 | Symbols:   ATPase, F1 complex, alpha subunit p   | 179 |
| Dark-1 | 59 | Background      | AT2G07698 | Symbols:   ATPase, F1 complex, alpha subunit p   | 179 |
| Dark-1 | 60 | Table 1 Filtere | AT3G16810 | Symbols: APUM24, PUM24   pumilio 24   chr3:5     | 179 |
| Dark-1 | 60 | Table 1 Filtere | AT3G16810 | Symbols: APUM24, PUM24   pumilio 24   chr3:5     | 179 |
| Dark-1 | 61 | Background      | AT3G61650 | Symbols: TUBG1   gamma-tubulin   chr3:228120     | 177 |
| Dark-1 | 61 | Background      | AT3G61650 | Symbols: TUBG1   gamma-tubulin   chr3:228120     | 177 |
| Dark-1 | 61 | Background      | AT3G61650 | Symbols: TUBG1   gamma-tubulin   chr3:228120     | 177 |
| Dark-1 | 61 | Background      | AT3G61650 | Symbols: TUBG1   gamma-tubulin   chr3:228120     | 177 |
| Dark-1 | 61 | Background      | AT3G61650 | Symbols: TUBG1   gamma-tubulin   chr3:228120     | 177 |
| Dark-1 | 62 | Background      | AT1G67120 | Symbols:   ATPases;nucleotide binding;ATP binc   | 172 |
| Dark-1 | 62 | Background      | AT1G67120 | Symbols:   ATPases;nucleotide binding;ATP binc   | 172 |
| Dark-1 | 62 | Background      | AT1G67120 | Symbols:   ATPases;nucleotide binding;ATP binc   | 172 |
| Dark-1 | 62 | Background      | AT1G67120 | Symbols:   ATPases;nucleotide binding;ATP binc   | 172 |
| Dark-1 | 62 | Background      | AT1G67120 | Symbols:   ATPases;nucleotide binding;ATP binc   | 172 |
| Dark-1 | 63 | Background      | AT4G24820 | Symbols:   26S proteasome, regulatory subunit    | 171 |
| Dark-1 | 63 | Background      | AT4G24820 | Symbols:   26S proteasome, regulatory subunit    | 171 |
| Dark-1 | 63 | Background      | AT4G24820 | Symbols:   26S proteasome, regulatory subunit    | 171 |
| Dark-1 | 64 | Background      | AT2G41800 | Symbols:   Protein of unknown function, DUF64    | 167 |
| Dark-1 | 64 | Background      | AT2G41800 | Symbols:   Protein of unknown function, DUF64    | 167 |
| Dark-1 | 64 | Background      | AT2G41800 | Symbols:   Protein of unknown function, DUF64    | 167 |
| Dark-1 | 64 | Background      | AT2G41800 | Symbols:   Protein of unknown function, DUF64    | 167 |

|        |    |                |           |                                                  |     |
|--------|----|----------------|-----------|--------------------------------------------------|-----|
| Dark-1 | 64 | Background     | AT2G41800 | Symbols:   Protein of unknown function, DUF64    | 167 |
| Dark-1 | 65 | Background     | AT2G15860 | Symbols:   unknown protein; FUNCTIONS IN: m      | 167 |
| Dark-1 | 65 | Background     | AT2G15860 | Symbols:   unknown protein; FUNCTIONS IN: m      | 167 |
| Dark-1 | 66 | Background     | AT5G43010 | Symbols: RPT4A   regulatory particle triple-A AT | 166 |
| Dark-1 | 66 | Background     | AT5G43010 | Symbols: RPT4A   regulatory particle triple-A AT | 166 |
| Dark-1 | 66 | Background     | AT5G43010 | Symbols: RPT4A   regulatory particle triple-A AT | 166 |
| Dark-1 | 66 | Background     | AT5G43010 | Symbols: RPT4A   regulatory particle triple-A AT | 166 |
| Dark-1 | 66 | Background     | AT5G43010 | Symbols: RPT4A   regulatory particle triple-A AT | 166 |
| Dark-1 | 66 | Background     | AT5G43010 | Symbols: RPT4A   regulatory particle triple-A AT | 166 |
| Dark-1 | 67 | Background     | AT2G42520 | Symbols:   P-loop containing nucleoside triphos  | 162 |
| Dark-1 | 67 | Background     | AT2G42520 | Symbols:   P-loop containing nucleoside triphos  | 162 |
| Dark-1 | 67 | Background     | AT2G42520 | Symbols:   P-loop containing nucleoside triphos  | 162 |
| Dark-1 | 67 | Background     | AT2G42520 | Symbols:   P-loop containing nucleoside triphos  | 162 |
| Dark-1 | 67 | Background     | AT2G42520 | Symbols:   P-loop containing nucleoside triphos  | 162 |
| Dark-1 | 68 | Background     | AT3G09200 | Symbols:   Ribosomal protein L10 family protei   | 162 |
| Dark-1 | 68 | Background     | AT3G09200 | Symbols:   Ribosomal protein L10 family protei   | 162 |
| Dark-1 | 68 | Background     | AT3G09200 | Symbols:   Ribosomal protein L10 family protei   | 162 |
| Dark-1 | 68 | Background     | AT3G09200 | Symbols:   Ribosomal protein L10 family protei   | 162 |
| Dark-1 | 69 | Background     | AT5G20290 | Symbols:   Ribosomal protein S8e family protei   | 161 |
| Dark-1 | 69 | Background     | AT5G20290 | Symbols:   Ribosomal protein S8e family protei   | 161 |
| Dark-1 | 69 | Background     | AT5G20290 | Symbols:   Ribosomal protein S8e family protei   | 161 |
| Dark-1 | 70 | Background     | AT3G12050 | Symbols:   Aha1 domain-containing protein   cl   | 155 |
| Dark-1 | 70 | Background     | AT3G12050 | Symbols:   Aha1 domain-containing protein   cl   | 155 |
| Dark-1 | 70 | Background     | AT3G12050 | Symbols:   Aha1 domain-containing protein   cl   | 155 |
| Dark-1 | 71 | Background     | AT1G64790 | Symbols: ILA   ILITYHIA   chr1:24065232-24081    | 153 |
| Dark-1 | 71 | Background     | AT1G64790 | Symbols: ILA   ILITYHIA   chr1:24065232-24081    | 153 |
| Dark-1 | 71 | Background     | AT1G64790 | Symbols: ILA   ILITYHIA   chr1:24065232-24081    | 153 |
| Dark-1 | 71 | Background     | AT1G64790 | Symbols: ILA   ILITYHIA   chr1:24065232-24081    | 153 |
| Dark-1 | 71 | Background     | AT1G64790 | Symbols: ILA   ILITYHIA   chr1:24065232-24081    | 153 |
| Dark-1 | 72 | Background     | AT5G56000 | Symbols: Hsp81.4, AtHsp90.4   HEAT SHOCK PR      | 153 |
| Dark-1 | 72 | Background     | AT5G56000 | Symbols: Hsp81.4, AtHsp90.4   HEAT SHOCK PR      | 153 |
| Dark-1 | 72 | Background     | AT5G56000 | Symbols: Hsp81.4, AtHsp90.4   HEAT SHOCK PR      | 153 |
| Dark-1 | 72 | Background     | AT5G56000 | Symbols: Hsp81.4, AtHsp90.4   HEAT SHOCK PR      | 153 |
| Dark-1 | 72 | Background     | AT5G56000 | Symbols: Hsp81.4, AtHsp90.4   HEAT SHOCK PR      | 153 |
| Dark-1 | 73 | Background     | AT2G24050 | Symbols: eFiso4G2   MIF4G domain-containing      | 147 |
| Dark-1 | 73 | Background     | AT2G24050 | Symbols: eFiso4G2   MIF4G domain-containing      | 147 |
| Dark-1 | 73 | Background     | AT2G24050 | Symbols: eFiso4G2   MIF4G domain-containing      | 147 |
| Dark-1 | 73 | Background     | AT2G24050 | Symbols: eFiso4G2   MIF4G domain-containing      | 147 |
| Dark-1 | 74 | Background     | AT1G43170 | Symbols: ARP1, emb2207, RPL3A, RP1   ribosom     | 146 |
| Dark-1 | 74 | Background     | AT1G43170 | Symbols: ARP1, emb2207, RPL3A, RP1   ribosom     | 146 |
| Dark-1 | 74 | Background     | AT1G43170 | Symbols: ARP1, emb2207, RPL3A, RP1   ribosom     | 146 |
| Dark-1 | 74 | Background     | AT1G43170 | Symbols: ARP1, emb2207, RPL3A, RP1   ribosom     | 146 |
| Dark-1 | 74 | Background     | AT1G43170 | Symbols: ARP1, emb2207, RPL3A, RP1   ribosom     | 146 |
| Dark-1 | 74 | Background     | AT1G43170 | Symbols: ARP1, emb2207, RPL3A, RP1   ribosom     | 146 |
| Dark-1 | 74 | Background     | AT1G43170 | Symbols: ARP1, emb2207, RPL3A, RP1   ribosom     | 146 |
| Dark-1 | 74 | Background     | AT1G43170 | Symbols: ARP1, emb2207, RPL3A, RP1   ribosom     | 146 |
| Dark-1 | 75 | Background     | AT5G58290 | Symbols: RPT3   regulatory particle triple-A ATP | 145 |
| Dark-1 | 75 | Background     | AT5G58290 | Symbols: RPT3   regulatory particle triple-A ATP | 145 |
| Dark-1 | 75 | Background     | AT5G58290 | Symbols: RPT3   regulatory particle triple-A ATP | 145 |
| Dark-1 | 75 | Background     | AT5G58290 | Symbols: RPT3   regulatory particle triple-A ATP | 145 |
| Dark-1 | 76 | Background     | AT1G79530 | Symbols: GAPCP-1   glyceraldehyde-3-phosphat     | 141 |
| Dark-1 | 76 | Background     | AT1G79530 | Symbols: GAPCP-1   glyceraldehyde-3-phosphat     | 141 |
| Dark-1 | 77 | Background     | AT4G01100 | Symbols: ADNT1   adenine nucleotide transport    | 140 |
| Dark-1 | 77 | Background     | AT4G01100 | Symbols: ADNT1   adenine nucleotide transport    | 140 |
| Dark-1 | 78 | Background     | AT5G62740 | Symbols: HIR1, ATHIR1   SPFH/Band 7/PHB dom      | 140 |
| Dark-1 | 78 | Background     | AT5G62740 | Symbols: HIR1, ATHIR1   SPFH/Band 7/PHB dom      | 140 |
| Dark-1 | 78 | Background     | AT5G62740 | Symbols: HIR1, ATHIR1   SPFH/Band 7/PHB dom      | 140 |
| Dark-1 | 79 | Background     | AT5G12370 | Symbols: SEC10   exocyst complex component s     | 139 |
| Dark-1 | 79 | Background     | AT5G12370 | Symbols: SEC10   exocyst complex component s     | 139 |
| Dark-1 | 80 | Table 1 Filter | AT1G59990 | Symbols:   DEA(D/H)-box RNA helicase family p    | 136 |

|        |     |                  |           |                                                  |     |
|--------|-----|------------------|-----------|--------------------------------------------------|-----|
| Dark-1 | 80  | Table 1 Filtered | AT1G59990 | Symbols:   DEA(D/H)-box RNA helicase family p    | 136 |
| Dark-1 | 80  | Table 1 Filtered | AT1G59990 | Symbols:   DEA(D/H)-box RNA helicase family p    | 136 |
| Dark-1 | 81  | Background       | AT3G09630 | Symbols:   Ribosomal protein L4/L1 family   chr  | 134 |
| Dark-1 | 81  | Background       | AT3G09630 | Symbols:   Ribosomal protein L4/L1 family   chr  | 134 |
| Dark-1 | 81  | Background       | AT3G09630 | Symbols:   Ribosomal protein L4/L1 family   chr  | 134 |
| Dark-1 | 81  | Background       | AT3G09630 | Symbols:   Ribosomal protein L4/L1 family   chr  | 134 |
| Dark-1 | 82  | Background       | AT3G04840 | Symbols:   Ribosomal protein S3Ae   chr3:1329    | 133 |
| Dark-1 | 82  | Background       | AT3G04840 | Symbols:   Ribosomal protein S3Ae   chr3:1329    | 133 |
| Dark-1 | 82  | Background       | AT3G04840 | Symbols:   Ribosomal protein S3Ae   chr3:1329    | 133 |
| Dark-1 | 83  | Background       | AT1G22780 | Symbols: PFL, RPS18A, PFL1   Ribosomal protein   | 132 |
| Dark-1 | 83  | Background       | AT1G22780 | Symbols: PFL, RPS18A, PFL1   Ribosomal protein   | 132 |
| Dark-1 | 83  | Background       | AT1G22780 | Symbols: PFL, RPS18A, PFL1   Ribosomal protein   | 132 |
| Dark-1 | 84  | Background       | AT5G14040 | Symbols: PHT3;1   phosphate transporter 3;1   c  | 130 |
| Dark-1 | 84  | Background       | AT5G14040 | Symbols: PHT3;1   phosphate transporter 3;1   c  | 130 |
| Dark-1 | 85  | Background       | AT3G08530 | Symbols:   Clathrin, heavy chain   chr3:258717:  | 124 |
| Dark-1 | 85  | Background       | AT3G08530 | Symbols:   Clathrin, heavy chain   chr3:258717:  | 124 |
| Dark-1 | 85  | Background       | AT3G08530 | Symbols:   Clathrin, heavy chain   chr3:258717:  | 124 |
| Dark-1 | 85  | Background       | AT3G08530 | Symbols:   Clathrin, heavy chain   chr3:258717:  | 124 |
| Dark-1 | 86  | Background       | AT1G36180 | Symbols: ACC2   acetyl-CoA carboxylase 2   chr1  | 122 |
| Dark-1 | 86  | Background       | AT1G36180 | Symbols: ACC2   acetyl-CoA carboxylase 2   chr1  | 122 |
| Dark-1 | 87  | Background       | AT3G05590 | Symbols: RPL18   ribosomal protein L18   chr3:1  | 121 |
| Dark-1 | 87  | Background       | AT3G05590 | Symbols: RPL18   ribosomal protein L18   chr3:1  | 121 |
| Dark-1 | 88  | Background       | AT5G19990 | Symbols: RPT6A, ATSUG1   regulatory particle tr  | 119 |
| Dark-1 | 88  | Background       | AT5G19990 | Symbols: RPT6A, ATSUG1   regulatory particle tr  | 119 |
| Dark-1 | 88  | Background       | AT5G19990 | Symbols: RPT6A, ATSUG1   regulatory particle tr  | 119 |
| Dark-1 | 88  | Background       | AT5G19990 | Symbols: RPT6A, ATSUG1   regulatory particle tr  | 119 |
| Dark-1 | 89  | Background       | AT1G10630 | Symbols: ATARFA1F, ARFA1F   ADP-ribosylation     | 116 |
| Dark-1 | 89  | Background       | AT1G10630 | Symbols: ATARFA1F, ARFA1F   ADP-ribosylation     | 116 |
| Dark-1 | 89  | Background       | AT1G10630 | Symbols: ATARFA1F, ARFA1F   ADP-ribosylation     | 116 |
| Dark-1 | 90  | Background       | AT2G36620 | Symbols: RPL24A   ribosomal protein L24   chr2   | 114 |
| Dark-1 | 90  | Background       | AT2G36620 | Symbols: RPL24A   ribosomal protein L24   chr2   | 114 |
| Dark-1 | 91  | Background       | AT1G80270 | Symbols: PPR596   PENTATRICOPEPTIDE REPEA        | 114 |
| Dark-1 | 91  | Background       | AT1G80270 | Symbols: PPR596   PENTATRICOPEPTIDE REPEA        | 114 |
| Dark-1 | 92  | Background       | AT2G42740 | Symbols: RPL16A   ribosomal protein large subu   | 113 |
| Dark-1 | 92  | Background       | AT2G42740 | Symbols: RPL16A   ribosomal protein large subu   | 113 |
| Dark-1 | 92  | Background       | AT2G42740 | Symbols: RPL16A   ribosomal protein large subu   | 113 |
| Dark-1 | 93  | Background       | AT1G80670 | Symbols:   Transducin/WD40 repeat-like superf    | 111 |
| Dark-1 | 93  | Background       | AT1G80670 | Symbols:   Transducin/WD40 repeat-like superf    | 111 |
| Dark-1 | 94  | Background       | AT5G37510 | Symbols: EMB1467, CI76   NADH-ubiquinone de      | 111 |
| Dark-1 | 94  | Background       | AT5G37510 | Symbols: EMB1467, CI76   NADH-ubiquinone de      | 111 |
| Dark-1 | 95  | Background       | AT3G57290 | Symbols: EIF3E, TIF3E1, ATEIF3E-1, INT-6, ATINT  | 109 |
| Dark-1 | 95  | Background       | AT3G57290 | Symbols: EIF3E, TIF3E1, ATEIF3E-1, INT-6, ATINT  | 109 |
| Dark-1 | 96  | Background       | AT3G23990 | Symbols: HSP60, HSP60-3B   heat shock protein    | 107 |
| Dark-1 | 96  | Background       | AT3G23990 | Symbols: HSP60, HSP60-3B   heat shock protein    | 107 |
| Dark-1 | 97  | Background       | AT5G28540 | Symbols: BIP1   heat shock protein 70 (Hsp 70) f | 106 |
| Dark-1 | 97  | Background       | AT5G28540 | Symbols: BIP1   heat shock protein 70 (Hsp 70) f | 106 |
| Dark-1 | 97  | Background       | AT5G28540 | Symbols: BIP1   heat shock protein 70 (Hsp 70) f | 106 |
| Dark-1 | 98  | Background       | AT1G20200 | Symbols: EMB2719, HAP15   PAM domain (PCI/       | 104 |
| Dark-1 | 98  | Background       | AT1G20200 | Symbols: EMB2719, HAP15   PAM domain (PCI/       | 104 |
| Dark-1 | 98  | Background       | AT1G20200 | Symbols: EMB2719, HAP15   PAM domain (PCI/       | 104 |
| Dark-1 | 99  | Background       | AT2G31660 | Symbols: SAD2, URM9   ARM repeat superfamily     | 103 |
| Dark-1 | 99  | Background       | AT2G31660 | Symbols: SAD2, URM9   ARM repeat superfamily     | 103 |
| Dark-1 | 100 | Background       | AT3G17390 | Symbols: MTO3, SAMS3, MAT4   S-adenosylmet       | 103 |
| Dark-1 | 100 | Background       | AT3G17390 | Symbols: MTO3, SAMS3, MAT4   S-adenosylmet       | 103 |
| Dark-1 | 100 | Background       | AT3G17390 | Symbols: MTO3, SAMS3, MAT4   S-adenosylmet       | 103 |
| Dark-1 | 101 | Background       | AT3G05560 | Symbols:   Ribosomal L22e protein family   chr:  | 102 |
| Dark-1 | 101 | Background       | AT3G05560 | Symbols:   Ribosomal L22e protein family   chr:  | 102 |
| Dark-1 | 102 | Background       | AT2G02790 | Symbols: IQD29   IQ-domain 29   chr2:788708-7    | 101 |

|        |     |            |           |                                                  |     |
|--------|-----|------------|-----------|--------------------------------------------------|-----|
| Dark-1 | 102 | Background | AT2G02790 | Symbols: IQD29   IQ-domain 29   chr2:788708-7    | 101 |
| Dark-1 | 103 | Background | AT1G53750 | Symbols: RPT1A   regulatory particle triple-A 1A | 100 |
| Dark-1 | 103 | Background | AT1G53750 | Symbols: RPT1A   regulatory particle triple-A 1A | 100 |
| Dark-1 | 104 | Background | AT5G19820 | Symbols: emb2734   ARM repeat superfamily pr     | 100 |
| Dark-1 | 104 | Background | AT5G19820 | Symbols: emb2734   ARM repeat superfamily pr     | 100 |
| Dark-1 | 105 | Background | AT2G17360 | Symbols:   Ribosomal protein S4 (RPS4A) family   | 99  |
| Dark-1 | 105 | Background | AT2G17360 | Symbols:   Ribosomal protein S4 (RPS4A) family   | 99  |
| Dark-1 | 105 | Background | AT2G17360 | Symbols:   Ribosomal protein S4 (RPS4A) family   | 99  |
| Dark-1 | 105 | Background | AT2G17360 | Symbols:   Ribosomal protein S4 (RPS4A) family   | 99  |
| Dark-1 | 106 | Background | AT2G15620 | Symbols: NIR1, NIR, ATHNIR   nitrite reductase 1 | 98  |
| Dark-1 | 106 | Background | AT2G15620 | Symbols: NIR1, NIR, ATHNIR   nitrite reductase 1 | 98  |
| Dark-1 | 106 | Background | AT2G15620 | Symbols: NIR1, NIR, ATHNIR   nitrite reductase 1 | 98  |
| Dark-1 | 107 | Background | AT4G11420 | Symbols: EIF3A, ATEIF3A-1, EIF3A-1, ATTIF3A1, T  | 98  |
| Dark-1 | 107 | Background | AT4G11420 | Symbols: EIF3A, ATEIF3A-1, EIF3A-1, ATTIF3A1, T  | 98  |
| Dark-1 | 108 | Background | AT5G16390 | Symbols: CAC1, CAC1A, BCCP, BCCP1   chloropla    | 98  |
| Dark-1 | 108 | Background | AT5G16390 | Symbols: CAC1, CAC1A, BCCP, BCCP1   chloropla    | 98  |
| Dark-1 | 108 | Background | AT5G16390 | Symbols: CAC1, CAC1A, BCCP, BCCP1   chloropla    | 98  |
| Dark-1 | 109 | Background | AT2G18330 | Symbols:   AAA-type ATPase family protein   ch   | 97  |
| Dark-1 | 109 | Background | AT2G18330 | Symbols:   AAA-type ATPase family protein   ch   | 97  |
| Dark-1 | 110 | Background | AT3G07050 | Symbols:   GTP-binding family protein   chr3:22  | 97  |
| Dark-1 | 110 | Background | AT3G07050 | Symbols:   GTP-binding family protein   chr3:22  | 97  |
| Dark-1 | 111 | Background | AT5G08610 | Symbols:   P-loop containing nucleoside triphos  | 93  |
| Dark-1 | 111 | Background | AT5G08610 | Symbols:   P-loop containing nucleoside triphos  | 93  |
| Dark-1 | 111 | Background | AT5G08610 | Symbols:   P-loop containing nucleoside triphos  | 93  |
| Dark-1 | 112 | Background | AT5G36230 | Symbols:   ARM repeat superfamily protein   cf   | 92  |
| Dark-1 | 112 | Background | AT5G36230 | Symbols:   ARM repeat superfamily protein   cf   | 92  |
| Dark-1 | 112 | Background | AT5G36230 | Symbols:   ARM repeat superfamily protein   cf   | 92  |
| Dark-1 | 112 | Background | AT5G36230 | Symbols:   ARM repeat superfamily protein   cf   | 92  |
| Dark-1 | 113 | Background | AT5G18700 | Symbols: RUK, EMB3013   Protein kinase family    | 90  |
| Dark-1 | 113 | Background | AT5G18700 | Symbols: RUK, EMB3013   Protein kinase family    | 90  |
| Dark-1 | 114 | Background | AT3G54110 | Symbols: ATPUMP1, UCP, PUMP1, ATUCP1, UCP        | 90  |
| Dark-1 | 114 | Background | AT3G54110 | Symbols: ATPUMP1, UCP, PUMP1, ATUCP1, UCP        | 90  |
| Dark-1 | 115 | Background | AT1G56110 | Symbols: NOP56   homolog of nucleolar protein    | 84  |
| Dark-1 | 115 | Background | AT1G56110 | Symbols: NOP56   homolog of nucleolar protein    | 84  |
| Dark-1 | 116 | Background | AT1G29150 | Symbols: ATS9, RPN6   non-ATPase subunit 9   c   | 83  |
| Dark-1 | 116 | Background | AT1G29150 | Symbols: ATS9, RPN6   non-ATPase subunit 9   c   | 83  |
| Dark-1 | 116 | Background | AT1G29150 | Symbols: ATS9, RPN6   non-ATPase subunit 9   c   | 83  |
| Dark-1 | 117 | Background | AT3G56130 | Symbols:   biotin/lipoyl attachment domain-cor   | 80  |
| Dark-1 | 117 | Background | AT3G56130 | Symbols:   biotin/lipoyl attachment domain-cor   | 80  |
| Dark-1 | 118 | Background | AT3G44110 | Symbols: ATJ3, ATJ   DNAJ homologue 3   chr3::   | 79  |
| Dark-1 | 118 | Background | AT3G44110 | Symbols: ATJ3, ATJ   DNAJ homologue 3   chr3::   | 79  |
| Dark-1 | 119 | Background | AT5G17020 | Symbols: XPO1A, ATRCM1, ATXPO1, XPO1, HIT2       | 78  |
| Dark-1 | 119 | Background | AT5G17020 | Symbols: XPO1A, ATRCM1, ATXPO1, XPO1, HIT2       | 78  |
| Dark-1 | 120 | Background | AT3G06720 | Symbols: AT-IMP, ATKAP ALPHA, AIMP ALPHA, II     | 78  |
| Dark-1 | 120 | Background | AT3G06720 | Symbols: AT-IMP, ATKAP ALPHA, AIMP ALPHA, II     | 78  |
| Dark-1 | 121 | Background | AT5G22060 | Symbols: ATJ2, J2   DNAJ homologue 2   chr5:7E   | 78  |
| Dark-1 | 121 | Background | AT5G22060 | Symbols: ATJ2, J2   DNAJ homologue 2   chr5:7E   | 78  |
| Dark-1 | 122 | Background | AT3G20050 | Symbols: ATTCP-1, TCP-1   T-complex protein 1    | 77  |
| Dark-1 | 122 | Background | AT3G20050 | Symbols: ATTCP-1, TCP-1   T-complex protein 1    | 77  |
| Dark-1 | 122 | Background | AT3G20050 | Symbols: ATTCP-1, TCP-1   T-complex protein 1    | 77  |
| Dark-1 | 123 | Background | AT5G27770 | Symbols:   Ribosomal L22e protein family   chr!  | 75  |
| Dark-1 | 123 | Background | AT5G27770 | Symbols:   Ribosomal L22e protein family   chr!  | 75  |
| Dark-1 | 124 | Background | AT2G36160 | Symbols:   Ribosomal protein S11 family protei   | 74  |
| Dark-1 | 124 | Background | AT2G36160 | Symbols:   Ribosomal protein S11 family protei   | 74  |
| Dark-1 | 125 | Background | AT2G01250 | Symbols:   Ribosomal protein L30/L7 family pro   | 67  |
| Dark-1 | 125 | Background | AT2G01250 | Symbols:   Ribosomal protein L30/L7 family pro   | 67  |
| Dark-1 | 126 | Background | AT1G10490 | Symbols:   Domain of unknown function (DUF1      | 64  |
| Dark-1 | 126 | Background | AT1G10490 | Symbols:   Domain of unknown function (DUF1      | 64  |





































|        |     |            |           |                                                  |     |
|--------|-----|------------|-----------|--------------------------------------------------|-----|
| Dark-2 | 229 | Background | AT5G58290 | Symbols: RPT3   regulatory particle triple-A ATP | 242 |
| Dark-2 | 229 | Background | AT5G58290 | Symbols: RPT3   regulatory particle triple-A ATP | 242 |
| Dark-2 | 229 | Background | AT5G58290 | Symbols: RPT3   regulatory particle triple-A ATP | 242 |
| Dark-2 | 229 | Background | AT5G58290 | Symbols: RPT3   regulatory particle triple-A ATP | 242 |
| Dark-2 | 229 | Background | AT5G58290 | Symbols: RPT3   regulatory particle triple-A ATP | 242 |
| Dark-2 | 229 | Background | AT5G58290 | Symbols: RPT3   regulatory particle triple-A ATP | 242 |
| Dark-2 | 229 | Background | AT5G58290 | Symbols: RPT3   regulatory particle triple-A ATP | 242 |
| Dark-2 | 230 | Background | AT5G56010 | Symbols: HSP81-3, Hsp81.3, AtHsp90-3, AtHsp90    | 240 |
| Dark-2 | 230 | Background | AT5G56010 | Symbols: HSP81-3, Hsp81.3, AtHsp90-3, AtHsp90    | 240 |
| Dark-2 | 230 | Background | AT5G56010 | Symbols: HSP81-3, Hsp81.3, AtHsp90-3, AtHsp90    | 240 |
| Dark-2 | 230 | Background | AT5G56010 | Symbols: HSP81-3, Hsp81.3, AtHsp90-3, AtHsp90    | 240 |
| Dark-2 | 230 | Background | AT5G56010 | Symbols: HSP81-3, Hsp81.3, AtHsp90-3, AtHsp90    | 240 |
| Dark-2 | 230 | Background | AT5G56010 | Symbols: HSP81-3, Hsp81.3, AtHsp90-3, AtHsp90    | 240 |
| Dark-2 | 230 | Background | AT5G56010 | Symbols: HSP81-3, Hsp81.3, AtHsp90-3, AtHsp90    | 240 |
| Dark-2 | 231 | Background | AT5G14040 | Symbols: PHT3;1   phosphate transporter 3;1   c  | 237 |
| Dark-2 | 231 | Background | AT5G14040 | Symbols: PHT3;1   phosphate transporter 3;1   c  | 237 |
| Dark-2 | 231 | Background | AT5G14040 | Symbols: PHT3;1   phosphate transporter 3;1   c  | 237 |
| Dark-2 | 231 | Background | AT5G14040 | Symbols: PHT3;1   phosphate transporter 3;1   c  | 237 |
| Dark-2 | 231 | Background | AT5G14040 | Symbols: PHT3;1   phosphate transporter 3;1   c  | 237 |
| Dark-2 | 231 | Background | AT5G14040 | Symbols: PHT3;1   phosphate transporter 3;1   c  | 237 |
| Dark-2 | 232 | Background | AT3G11250 | Symbols:   Ribosomal protein L10 family protein  | 234 |
| Dark-2 | 232 | Background | AT3G11250 | Symbols:   Ribosomal protein L10 family protein  | 234 |
| Dark-2 | 232 | Background | AT3G11250 | Symbols:   Ribosomal protein L10 family protein  | 234 |
| Dark-2 | 233 | Background | AT3G25520 | Symbols: ATL5, PGY3, OLI5, RPL5A   ribosomal p   | 231 |
| Dark-2 | 233 | Background | AT3G25520 | Symbols: ATL5, PGY3, OLI5, RPL5A   ribosomal p   | 231 |
| Dark-2 | 234 | Background | AT5G28540 | Symbols: BIP1   heat shock protein 70 (Hsp 70) f | 231 |
| Dark-2 | 234 | Background | AT5G28540 | Symbols: BIP1   heat shock protein 70 (Hsp 70) f | 231 |
| Dark-2 | 234 | Background | AT5G28540 | Symbols: BIP1   heat shock protein 70 (Hsp 70) f | 231 |
| Dark-2 | 234 | Background | AT5G28540 | Symbols: BIP1   heat shock protein 70 (Hsp 70) f | 231 |
| Dark-2 | 234 | Background | AT5G28540 | Symbols: BIP1   heat shock protein 70 (Hsp 70) f | 231 |
| Dark-2 | 234 | Background | AT5G28540 | Symbols: BIP1   heat shock protein 70 (Hsp 70) f | 231 |
| Dark-2 | 235 | Background | AT2G31610 | Symbols:   Ribosomal protein S3 family protein   | 225 |
| Dark-2 | 235 | Background | AT2G31610 | Symbols:   Ribosomal protein S3 family protein   | 225 |
| Dark-2 | 235 | Background | AT2G31610 | Symbols:   Ribosomal protein S3 family protein   | 225 |
| Dark-2 | 236 | Background | AT5G02870 | Symbols:   Ribosomal protein L4/L1 family   chr  | 224 |
| Dark-2 | 236 | Background | AT5G02870 | Symbols:   Ribosomal protein L4/L1 family   chr  | 224 |
| Dark-2 | 236 | Background | AT5G02870 | Symbols:   Ribosomal protein L4/L1 family   chr  | 224 |
| Dark-2 | 236 | Background | AT5G02870 | Symbols:   Ribosomal protein L4/L1 family   chr  | 224 |
| Dark-2 | 236 | Background | AT5G02870 | Symbols:   Ribosomal protein L4/L1 family   chr  | 224 |
| Dark-2 | 236 | Background | AT5G02870 | Symbols:   Ribosomal protein L4/L1 family   chr  | 224 |
| Dark-2 | 237 | Background | AT5G47690 | Symbols:   binding   chr5:19317899-19327014      | 224 |
| Dark-2 | 237 | Background | AT5G47690 | Symbols:   binding   chr5:19317899-19327014      | 224 |
| Dark-2 | 237 | Background | AT5G47690 | Symbols:   binding   chr5:19317899-19327014      | 224 |
| Dark-2 | 238 | Background | AT1G15480 | Symbols:   Tetratricopeptide repeat (TPR)-like s | 221 |
| Dark-2 | 238 | Background | AT1G15480 | Symbols:   Tetratricopeptide repeat (TPR)-like s | 221 |
| Dark-2 | 238 | Background | AT1G15480 | Symbols:   Tetratricopeptide repeat (TPR)-like s | 221 |
| Dark-2 | 238 | Background | AT1G15480 | Symbols:   Tetratricopeptide repeat (TPR)-like s | 221 |
| Dark-2 | 239 | Background | AT5G20290 | Symbols:   Ribosomal protein S8e family protein  | 218 |
| Dark-2 | 239 | Background | AT5G20290 | Symbols:   Ribosomal protein S8e family protein  | 218 |
| Dark-2 | 239 | Background | AT5G20290 | Symbols:   Ribosomal protein S8e family protein  | 218 |
| Dark-2 | 239 | Background | AT5G20290 | Symbols:   Ribosomal protein S8e family protein  | 218 |
| Dark-2 | 239 | Background | AT5G20290 | Symbols:   Ribosomal protein S8e family protein  | 218 |
| Dark-2 | 240 | Background | AT1G53750 | Symbols: RPT1A   regulatory particle triple-A 1A | 217 |
| Dark-2 | 240 | Background | AT1G53750 | Symbols: RPT1A   regulatory particle triple-A 1A | 217 |
| Dark-2 | 240 | Background | AT1G53750 | Symbols: RPT1A   regulatory particle triple-A 1A | 217 |
| Dark-2 | 240 | Background | AT1G53750 | Symbols: RPT1A   regulatory particle triple-A 1A | 217 |
| Dark-2 | 240 | Background | AT1G53750 | Symbols: RPT1A   regulatory particle triple-A 1A | 217 |
| Dark-2 | 241 | Background | AT4G11380 | Symbols:   Adaptin family protein   chr4:69206   | 215 |
| Dark-2 | 241 | Background | AT4G11380 | Symbols:   Adaptin family protein   chr4:69206   | 215 |
| Dark-2 | 241 | Background | AT4G11380 | Symbols:   Adaptin family protein   chr4:69206   | 215 |
| Dark-2 | 241 | Background | AT4G11380 | Symbols:   Adaptin family protein   chr4:69206   | 215 |

|        |     |            |           |                                                   |     |
|--------|-----|------------|-----------|---------------------------------------------------|-----|
| Dark-2 | 241 | Background | AT4G11380 | Symbols:   Adaptin family protein   chr4:69206    | 215 |
| Dark-2 | 242 | Background | AT2G46900 | Symbols:   CONTAINS InterPro DOMAIN/s: Basic      | 210 |
| Dark-2 | 242 | Background | AT2G46900 | Symbols:   CONTAINS InterPro DOMAIN/s: Basic      | 210 |
| Dark-2 | 242 | Background | AT2G46900 | Symbols:   CONTAINS InterPro DOMAIN/s: Basic      | 210 |
| Dark-2 | 243 | Background | AT5G56500 | Symbols:   TCP-1/cpn60 chaperonin family prot     | 207 |
| Dark-2 | 243 | Background | AT5G56500 | Symbols:   TCP-1/cpn60 chaperonin family prot     | 207 |
| Dark-2 | 243 | Background | AT5G56500 | Symbols:   TCP-1/cpn60 chaperonin family prot     | 207 |
| Dark-2 | 243 | Background | AT5G56500 | Symbols:   TCP-1/cpn60 chaperonin family prot     | 207 |
| Dark-2 | 243 | Background | AT5G56500 | Symbols:   TCP-1/cpn60 chaperonin family prot     | 207 |
| Dark-2 | 244 | Background | AT3G13160 | Symbols:   Tetratricopeptide repeat (TPR)-like s  | 207 |
| Dark-2 | 244 | Background | AT3G13160 | Symbols:   Tetratricopeptide repeat (TPR)-like s  | 207 |
| Dark-2 | 245 | Background | AT3G07050 | Symbols:   GTP-binding family protein   chr3:22   | 206 |
| Dark-2 | 245 | Background | AT3G07050 | Symbols:   GTP-binding family protein   chr3:22   | 206 |
| Dark-2 | 246 | Background | AT4G23460 | Symbols:   Adaptin family protein   chr4:12243    | 204 |
| Dark-2 | 246 | Background | AT4G23460 | Symbols:   Adaptin family protein   chr4:12243    | 204 |
| Dark-2 | 246 | Background | AT4G23460 | Symbols:   Adaptin family protein   chr4:12243    | 204 |
| Dark-2 | 246 | Background | AT4G23460 | Symbols:   Adaptin family protein   chr4:12243    | 204 |
| Dark-2 | 246 | Background | AT4G23460 | Symbols:   Adaptin family protein   chr4:12243    | 204 |
| Dark-2 | 246 | Background | AT4G23460 | Symbols:   Adaptin family protein   chr4:12243    | 204 |
| Dark-2 | 247 | Background | AT3G59020 | Symbols:   ARM repeat superfamily protein   cl    | 203 |
| Dark-2 | 247 | Background | AT3G59020 | Symbols:   ARM repeat superfamily protein   cl    | 203 |
| Dark-2 | 247 | Background | AT3G59020 | Symbols:   ARM repeat superfamily protein   cl    | 203 |
| Dark-2 | 247 | Background | AT3G59020 | Symbols:   ARM repeat superfamily protein   cl    | 203 |
| Dark-2 | 247 | Background | AT3G59020 | Symbols:   ARM repeat superfamily protein   cl    | 203 |
| Dark-2 | 248 | Background | AT3G11830 | Symbols:   TCP-1/cpn60 chaperonin family prot     | 202 |
| Dark-2 | 248 | Background | AT3G11830 | Symbols:   TCP-1/cpn60 chaperonin family prot     | 202 |
| Dark-2 | 248 | Background | AT3G11830 | Symbols:   TCP-1/cpn60 chaperonin family prot     | 202 |
| Dark-2 | 249 | Background | AT1G36180 | Symbols: ACC2   acetyl-CoA carboxylase 2   chr1   | 200 |
| Dark-2 | 249 | Background | AT1G36180 | Symbols: ACC2   acetyl-CoA carboxylase 2   chr1   | 200 |
| Dark-2 | 249 | Background | AT1G36180 | Symbols: ACC2   acetyl-CoA carboxylase 2   chr1   | 200 |
| Dark-2 | 249 | Background | AT1G36180 | Symbols: ACC2   acetyl-CoA carboxylase 2   chr1   | 200 |
| Dark-2 | 250 | Background | AT1G43170 | Symbols: ARP1, emb2207, RPL3A, RP1   ribosom      | 199 |
| Dark-2 | 250 | Background | AT1G43170 | Symbols: ARP1, emb2207, RPL3A, RP1   ribosom      | 199 |
| Dark-2 | 250 | Background | AT1G43170 | Symbols: ARP1, emb2207, RPL3A, RP1   ribosom      | 199 |
| Dark-2 | 250 | Background | AT1G43170 | Symbols: ARP1, emb2207, RPL3A, RP1   ribosom      | 199 |
| Dark-2 | 250 | Background | AT1G43170 | Symbols: ARP1, emb2207, RPL3A, RP1   ribosom      | 199 |
| Dark-2 | 250 | Background | AT1G43170 | Symbols: ARP1, emb2207, RPL3A, RP1   ribosom      | 199 |
| Dark-2 | 250 | Background | AT1G43170 | Symbols: ARP1, emb2207, RPL3A, RP1   ribosom      | 199 |
| Dark-2 | 250 | Background | AT1G43170 | Symbols: ARP1, emb2207, RPL3A, RP1   ribosom      | 199 |
| Dark-2 | 250 | Background | AT1G43170 | Symbols: ARP1, emb2207, RPL3A, RP1   ribosom      | 199 |
| Dark-2 | 250 | Background | AT1G43170 | Symbols: ARP1, emb2207, RPL3A, RP1   ribosom      | 199 |
| Dark-2 | 251 | Background | AT1G20200 | Symbols: EMB2719, HAP15   PAM domain (PCI/        | 195 |
| Dark-2 | 251 | Background | AT1G20200 | Symbols: EMB2719, HAP15   PAM domain (PCI/        | 195 |
| Dark-2 | 251 | Background | AT1G20200 | Symbols: EMB2719, HAP15   PAM domain (PCI/        | 195 |
| Dark-2 | 251 | Background | AT1G20200 | Symbols: EMB2719, HAP15   PAM domain (PCI/        | 195 |
| Dark-2 | 251 | Background | AT1G20200 | Symbols: EMB2719, HAP15   PAM domain (PCI/        | 195 |
| Dark-2 | 251 | Background | AT1G20200 | Symbols: EMB2719, HAP15   PAM domain (PCI/        | 195 |
| Dark-2 | 252 | Background | AT5G51430 | Symbols: EYE   conserved oligomeric Golgi com     | 192 |
| Dark-2 | 252 | Background | AT5G51430 | Symbols: EYE   conserved oligomeric Golgi com     | 192 |
| Dark-2 | 253 | Background | AT4G17530 | Symbols: RAB1C, ATRAB1C, ATRABD2C   RAB GT        | 191 |
| Dark-2 | 253 | Background | AT4G17530 | Symbols: RAB1C, ATRAB1C, ATRABD2C   RAB GT        | 191 |
| Dark-2 | 253 | Background | AT4G17530 | Symbols: RAB1C, ATRAB1C, ATRABD2C   RAB GT        | 191 |
| Dark-2 | 253 | Background | AT4G17530 | Symbols: RAB1C, ATRAB1C, ATRABD2C   RAB GT        | 191 |
| Dark-2 | 254 | Background | AT2G39990 | Symbols: EIF2, AtEIF3f, eIF3F   eukaryotic transi | 189 |
| Dark-2 | 254 | Background | AT2G39990 | Symbols: EIF2, AtEIF3f, eIF3F   eukaryotic transi | 189 |
| Dark-2 | 254 | Background | AT2G39990 | Symbols: EIF2, AtEIF3f, eIF3F   eukaryotic transi | 189 |
| Dark-2 | 254 | Background | AT2G39990 | Symbols: EIF2, AtEIF3f, eIF3F   eukaryotic transi | 189 |
| Dark-2 | 254 | Background | AT2G39990 | Symbols: EIF2, AtEIF3f, eIF3F   eukaryotic transi | 189 |
| Dark-2 | 255 | Background | AT1G22780 | Symbols: PFL, RPS18A, PFL1   Ribosomal protein    | 187 |
| Dark-2 | 255 | Background | AT1G22780 | Symbols: PFL, RPS18A, PFL1   Ribosomal protein    | 187 |

|        |     |            |           |                                                 |     |
|--------|-----|------------|-----------|-------------------------------------------------|-----|
| Dark-2 | 255 | Background | AT1G22780 | Symbols: PFL, RPS18A, PFL1   Ribosomal protein  | 187 |
| Dark-2 | 256 | Background | AT2G37270 | Symbols: ATRPS5B, RPS5B   ribosomal protein 5   | 187 |
| Dark-2 | 256 | Background | AT2G37270 | Symbols: ATRPS5B, RPS5B   ribosomal protein 5   | 187 |
| Dark-2 | 256 | Background | AT2G37270 | Symbols: ATRPS5B, RPS5B   ribosomal protein 5   | 187 |
| Dark-2 | 257 | Background | AT5G15090 | Symbols: VDAC3, ATVDAC3   voltage dependent     | 186 |
| Dark-2 | 257 | Background | AT5G15090 | Symbols: VDAC3, ATVDAC3   voltage dependent     | 186 |
| Dark-2 | 257 | Background | AT5G15090 | Symbols: VDAC3, ATVDAC3   voltage dependent     | 186 |
| Dark-2 | 257 | Background | AT5G15090 | Symbols: VDAC3, ATVDAC3   voltage dependent     | 186 |
| Dark-2 | 258 | Background | AT4G02930 | Symbols:   GTP binding Elongation factor Tu fan | 181 |
| Dark-2 | 258 | Background | AT4G02930 | Symbols:   GTP binding Elongation factor Tu fan | 181 |
| Dark-2 | 258 | Background | AT4G02930 | Symbols:   GTP binding Elongation factor Tu fan | 181 |
| Dark-2 | 259 | Background | AT5G19760 | Symbols:   Mitochondrial substrate carrier fami | 178 |
| Dark-2 | 259 | Background | AT5G19760 | Symbols:   Mitochondrial substrate carrier fami | 178 |
| Dark-2 | 259 | Background | AT5G19760 | Symbols:   Mitochondrial substrate carrier fami | 178 |
| Dark-2 | 259 | Background | AT5G19760 | Symbols:   Mitochondrial substrate carrier fami | 178 |
| Dark-2 | 259 | Background | AT5G19760 | Symbols:   Mitochondrial substrate carrier fami | 178 |
| Dark-2 | 260 | Background | AT3G10380 | Symbols: SEC8, ATSEC8   subunit of exocyst corr | 178 |
| Dark-2 | 260 | Background | AT3G10380 | Symbols: SEC8, ATSEC8   subunit of exocyst corr | 178 |
| Dark-2 | 261 | Background | AT3G08530 | Symbols:   Clathrin, heavy chain   chr3:258717: | 174 |
| Dark-2 | 261 | Background | AT3G08530 | Symbols:   Clathrin, heavy chain   chr3:258717: | 174 |
| Dark-2 | 261 | Background | AT3G08530 | Symbols:   Clathrin, heavy chain   chr3:258717: | 174 |
| Dark-2 | 261 | Background | AT3G08530 | Symbols:   Clathrin, heavy chain   chr3:258717: | 174 |
| Dark-2 | 262 | Background | AT4G34450 | Symbols:   coatomer gamma-2 subunit, putativ    | 174 |
| Dark-2 | 262 | Background | AT4G34450 | Symbols:   coatomer gamma-2 subunit, putativ    | 174 |
| Dark-2 | 262 | Background | AT4G34450 | Symbols:   coatomer gamma-2 subunit, putativ    | 174 |
| Dark-2 | 263 | Background | AT3G57290 | Symbols: EIF3E, TIF3E1, ATEIF3E-1, INT-6, ATINT | 171 |
| Dark-2 | 263 | Background | AT3G57290 | Symbols: EIF3E, TIF3E1, ATEIF3E-1, INT-6, ATINT | 171 |
| Dark-2 | 263 | Background | AT3G57290 | Symbols: EIF3E, TIF3E1, ATEIF3E-1, INT-6, ATINT | 171 |
| Dark-2 | 263 | Background | AT3G57290 | Symbols: EIF3E, TIF3E1, ATEIF3E-1, INT-6, ATINT | 171 |
| Dark-2 | 263 | Background | AT3G57290 | Symbols: EIF3E, TIF3E1, ATEIF3E-1, INT-6, ATINT | 171 |
| Dark-2 | 264 | Background | AT1G65220 | Symbols:   ARM repeat superfamily protein   cf  | 169 |
| Dark-2 | 264 | Background | AT1G65220 | Symbols:   ARM repeat superfamily protein   cf  | 169 |
| Dark-2 | 264 | Background | AT1G65220 | Symbols:   ARM repeat superfamily protein   cf  | 169 |
| Dark-2 | 264 | Background | AT1G65220 | Symbols:   ARM repeat superfamily protein   cf  | 169 |
| Dark-2 | 264 | Background | AT1G65220 | Symbols:   ARM repeat superfamily protein   cf  | 169 |
| Dark-2 | 265 | Background | AT1G64520 | Symbols: RPN12a   regulatory particle non-ATPa  | 168 |
| Dark-2 | 265 | Background | AT1G64520 | Symbols: RPN12a   regulatory particle non-ATPa  | 168 |
| Dark-2 | 265 | Background | AT1G64520 | Symbols: RPN12a   regulatory particle non-ATPa  | 168 |
| Dark-2 | 266 | Background | AT5G49910 | Symbols: CPHSC70-2EAT SHOCK PROTEIN 70-2, I     | 167 |
| Dark-2 | 266 | Background | AT5G49910 | Symbols: CPHSC70-2EAT SHOCK PROTEIN 70-2, I     | 167 |
| Dark-2 | 266 | Background | AT5G49910 | Symbols: CPHSC70-2EAT SHOCK PROTEIN 70-2, I     | 167 |
| Dark-2 | 266 | Background | AT5G49910 | Symbols: CPHSC70-2EAT SHOCK PROTEIN 70-2, I     | 167 |
| Dark-2 | 267 | Background | AT2G44120 | Symbols:   Ribosomal protein L30/L7 family pro  | 167 |
| Dark-2 | 267 | Background | AT2G44120 | Symbols:   Ribosomal protein L30/L7 family pro  | 167 |
| Dark-2 | 267 | Background | AT2G44120 | Symbols:   Ribosomal protein L30/L7 family pro  | 167 |
| Dark-2 | 267 | Background | AT2G44120 | Symbols:   Ribosomal protein L30/L7 family pro  | 167 |
| Dark-2 | 268 | Background | AT3G10690 | Symbols: GYRA   DNA GYRASE A   chr3:3339612     | 166 |
| Dark-2 | 268 | Background | AT3G10690 | Symbols: GYRA   DNA GYRASE A   chr3:3339612     | 166 |
| Dark-2 | 268 | Background | AT3G10690 | Symbols: GYRA   DNA GYRASE A   chr3:3339612     | 166 |
| Dark-2 | 268 | Background | AT3G10690 | Symbols: GYRA   DNA GYRASE A   chr3:3339612     | 166 |
| Dark-2 | 269 | Background | AT2G20450 | Symbols:   Ribosomal protein L14   chr2:88139   | 164 |
| Dark-2 | 269 | Background | AT2G20450 | Symbols:   Ribosomal protein L14   chr2:88139   | 164 |
| Dark-2 | 270 | Background | AT1G01960 | Symbols: EDA10   SEC7-like guanine nucleotide   | 164 |
| Dark-2 | 270 | Background | AT1G01960 | Symbols: EDA10   SEC7-like guanine nucleotide   | 164 |
| Dark-2 | 270 | Background | AT1G01960 | Symbols: EDA10   SEC7-like guanine nucleotide   | 164 |
| Dark-2 | 271 | Background | AT3G54110 | Symbols: ATPUMP1, UCP, PUMP1, ATUCP1, UCP       | 162 |
| Dark-2 | 271 | Background | AT3G54110 | Symbols: ATPUMP1, UCP, PUMP1, ATUCP1, UCP       | 162 |
| Dark-2 | 271 | Background | AT3G54110 | Symbols: ATPUMP1, UCP, PUMP1, ATUCP1, UCP       | 162 |

|        |                |           |                                                  |     |
|--------|----------------|-----------|--------------------------------------------------|-----|
| Dark-2 | 271 Background | AT3G54110 | Symbols: ATPUMP1, UCP, PUMP1, ATUCP1, UCP        | 162 |
| Dark-2 | 272 Background | AT1G02080 | Symbols:   transcription regulators   chr1:3733: | 162 |
| Dark-2 | 272 Background | AT1G02080 | Symbols:   transcription regulators   chr1:3733: | 162 |
| Dark-2 | 272 Background | AT1G02080 | Symbols:   transcription regulators   chr1:3733: | 162 |
| Dark-2 | 272 Background | AT1G02080 | Symbols:   transcription regulators   chr1:3733: | 162 |
| Dark-2 | 273 Background | AT3G04840 | Symbols:   Ribosomal protein S3Ae   chr3:1329    | 162 |
| Dark-2 | 273 Background | AT3G04840 | Symbols:   Ribosomal protein S3Ae   chr3:1329    | 162 |
| Dark-2 | 273 Background | AT3G04840 | Symbols:   Ribosomal protein S3Ae   chr3:1329    | 162 |
| Dark-2 | 273 Background | AT3G04840 | Symbols:   Ribosomal protein S3Ae   chr3:1329    | 162 |
| Dark-2 | 274 Background | AT5G26742 | Symbols: emb1138   DEAD box RNA helicase (Rf     | 161 |
| Dark-2 | 274 Background | AT5G26742 | Symbols: emb1138   DEAD box RNA helicase (Rf     | 161 |
| Dark-2 | 274 Background | AT5G26742 | Symbols: emb1138   DEAD box RNA helicase (Rf     | 161 |
| Dark-2 | 274 Background | AT5G26742 | Symbols: emb1138   DEAD box RNA helicase (Rf     | 161 |
| Dark-2 | 274 Background | AT5G26742 | Symbols: emb1138   DEAD box RNA helicase (Rf     | 161 |
| Dark-2 | 274 Background | AT5G26742 | Symbols: emb1138   DEAD box RNA helicase (Rf     | 161 |
| Dark-2 | 275 Background | AT3G49870 | Symbols: ATARLA1C, ARLA1C   ADP-ribosylation     | 161 |
| Dark-2 | 275 Background | AT3G49870 | Symbols: ATARLA1C, ARLA1C   ADP-ribosylation     | 161 |
| Dark-2 | 275 Background | AT3G49870 | Symbols: ATARLA1C, ARLA1C   ADP-ribosylation     | 161 |
| Dark-2 | 276 Background | AT3G02530 | Symbols:   TCP-1/cpn60 chaperonin family prot    | 159 |
| Dark-2 | 276 Background | AT3G02530 | Symbols:   TCP-1/cpn60 chaperonin family prot    | 159 |
| Dark-2 | 276 Background | AT3G02530 | Symbols:   TCP-1/cpn60 chaperonin family prot    | 159 |
| Dark-2 | 276 Background | AT3G02530 | Symbols:   TCP-1/cpn60 chaperonin family prot    | 159 |
| Dark-2 | 277 Background | AT2G44610 | Symbols: RAB6, ATRABH1B, ATRAB6A, RAB6A          | 159 |
| Dark-2 | 277 Background | AT2G44610 | Symbols: RAB6, ATRABH1B, ATRAB6A, RAB6A          | 159 |
| Dark-2 | 277 Background | AT2G44610 | Symbols: RAB6, ATRABH1B, ATRAB6A, RAB6A          | 159 |
| Dark-2 | 277 Background | AT2G44610 | Symbols: RAB6, ATRABH1B, ATRAB6A, RAB6A          | 159 |
| Dark-2 | 278 Background | AT5G59840 | Symbols:   Ras-related small GTP-binding family  | 157 |
| Dark-2 | 278 Background | AT5G59840 | Symbols:   Ras-related small GTP-binding family  | 157 |
| Dark-2 | 278 Background | AT5G59840 | Symbols:   Ras-related small GTP-binding family  | 157 |
| Dark-2 | 278 Background | AT5G59840 | Symbols:   Ras-related small GTP-binding family  | 157 |
| Dark-2 | 279 Background | AT1G18450 | Symbols: ATARP4, ARP4   actin-related protein 4  | 156 |
| Dark-2 | 279 Background | AT1G18450 | Symbols: ATARP4, ARP4   actin-related protein 4  | 156 |
| Dark-2 | 280 Background | AT3G05590 | Symbols: RPL18   ribosomal protein L18   chr3:1  | 155 |
| Dark-2 | 280 Background | AT3G05590 | Symbols: RPL18   ribosomal protein L18   chr3:1  | 155 |
| Dark-2 | 280 Background | AT3G05590 | Symbols: RPL18   ribosomal protein L18   chr3:1  | 155 |
| Dark-2 | 281 Background | AT2G17360 | Symbols:   Ribosomal protein S4 (RPS4A) family   | 151 |
| Dark-2 | 281 Background | AT2G17360 | Symbols:   Ribosomal protein S4 (RPS4A) family   | 151 |
| Dark-2 | 281 Background | AT2G17360 | Symbols:   Ribosomal protein S4 (RPS4A) family   | 151 |
| Dark-2 | 281 Background | AT2G17360 | Symbols:   Ribosomal protein S4 (RPS4A) family   | 151 |
| Dark-2 | 281 Background | AT2G17360 | Symbols:   Ribosomal protein S4 (RPS4A) family   | 151 |
| Dark-2 | 282 Background | AT4G38630 | Symbols: RPN10, MCB1, ATMCB1, MBP1   reguli      | 150 |
| Dark-2 | 282 Background | AT4G38630 | Symbols: RPN10, MCB1, ATMCB1, MBP1   reguli      | 150 |
| Dark-2 | 283 Background | AT2G41800 | Symbols:   Protein of unknown function, DUF64    | 150 |
| Dark-2 | 283 Background | AT2G41800 | Symbols:   Protein of unknown function, DUF64    | 150 |
| Dark-2 | 283 Background | AT2G41800 | Symbols:   Protein of unknown function, DUF64    | 150 |
| Dark-2 | 283 Background | AT2G41800 | Symbols:   Protein of unknown function, DUF64    | 150 |
| Dark-2 | 284 Background | AT5G43780 | Symbols: APS4   Pseudouridine synthase/archae    | 149 |
| Dark-2 | 284 Background | AT5G43780 | Symbols: APS4   Pseudouridine synthase/archae    | 149 |
| Dark-2 | 284 Background | AT5G43780 | Symbols: APS4   Pseudouridine synthase/archae    | 149 |
| Dark-2 | 284 Background | AT5G43780 | Symbols: APS4   Pseudouridine synthase/archae    | 149 |
| Dark-2 | 285 Background | AT5G24710 | Symbols:   Transducin/WD40 repeat-like superf    | 148 |
| Dark-2 | 285 Background | AT5G24710 | Symbols:   Transducin/WD40 repeat-like superf    | 148 |
| Dark-2 | 285 Background | AT5G24710 | Symbols:   Transducin/WD40 repeat-like superf    | 148 |
| Dark-2 | 286 Background | AT5G51570 | Symbols:   SPFH/Band 7/PHB domain-containin      | 147 |
| Dark-2 | 286 Background | AT5G51570 | Symbols:   SPFH/Band 7/PHB domain-containin      | 147 |
| Dark-2 | 286 Background | AT5G51570 | Symbols:   SPFH/Band 7/PHB domain-containin      | 147 |
| Dark-2 | 287 Background | AT5G05010 | Symbols:   clathrin adaptor complexes medium     | 147 |
| Dark-2 | 287 Background | AT5G05010 | Symbols:   clathrin adaptor complexes medium     | 147 |

|        |     |            |           |                                                 |     |
|--------|-----|------------|-----------|-------------------------------------------------|-----|
| Dark-2 | 288 | Background | AT4G18800 | Symbols: ATHSGBP, ATRAB11B, ATRABA1D, RAB       | 147 |
| Dark-2 | 288 | Background | AT4G18800 | Symbols: ATHSGBP, ATRAB11B, ATRABA1D, RAB       | 147 |
| Dark-2 | 288 | Background | AT4G18800 | Symbols: ATHSGBP, ATRAB11B, ATRABA1D, RAB       | 147 |
| Dark-2 | 288 | Background | AT4G18800 | Symbols: ATHSGBP, ATRAB11B, ATRABA1D, RAB       | 147 |
| Dark-2 | 288 | Background | AT4G18800 | Symbols: ATHSGBP, ATRAB11B, ATRABA1D, RAB       | 147 |
| Dark-2 | 289 | Background | AT5G09900 | Symbols: EMB2107, RPN5A, MSA   26S proteasc     | 146 |
| Dark-2 | 289 | Background | AT5G09900 | Symbols: EMB2107, RPN5A, MSA   26S proteasc     | 146 |
| Dark-2 | 289 | Background | AT5G09900 | Symbols: EMB2107, RPN5A, MSA   26S proteasc     | 146 |
| Dark-2 | 289 | Background | AT5G09900 | Symbols: EMB2107, RPN5A, MSA   26S proteasc     | 146 |
| Dark-2 | 289 | Background | AT5G09900 | Symbols: EMB2107, RPN5A, MSA   26S proteasc     | 146 |
| Dark-2 | 290 | Background | AT5G50850 | Symbols: MAB1   Transketolase family protein    | 146 |
| Dark-2 | 290 | Background | AT5G50850 | Symbols: MAB1   Transketolase family protein    | 146 |
| Dark-2 | 290 | Background | AT5G50850 | Symbols: MAB1   Transketolase family protein    | 146 |
| Dark-2 | 291 | Background | AT5G08610 | Symbols:   P-loop containing nucleoside triphos | 144 |
| Dark-2 | 291 | Background | AT5G08610 | Symbols:   P-loop containing nucleoside triphos | 144 |
| Dark-2 | 291 | Background | AT5G08610 | Symbols:   P-loop containing nucleoside triphos | 144 |
| Dark-2 | 291 | Background | AT5G08610 | Symbols:   P-loop containing nucleoside triphos | 144 |
| Dark-2 | 292 | Background | AT4G01100 | Symbols: ADNT1   adenine nucleotide transport   | 143 |
| Dark-2 | 292 | Background | AT4G01100 | Symbols: ADNT1   adenine nucleotide transport   | 143 |
| Dark-2 | 292 | Background | AT4G01100 | Symbols: ADNT1   adenine nucleotide transport   | 143 |
| Dark-2 | 293 | Background | AT4G11420 | Symbols: EIF3A, ATEIF3A-1, EIF3A-1, ATTIF3A1, T | 142 |
| Dark-2 | 293 | Background | AT4G11420 | Symbols: EIF3A, ATEIF3A-1, EIF3A-1, ATTIF3A1, T | 142 |
| Dark-2 | 293 | Background | AT4G11420 | Symbols: EIF3A, ATEIF3A-1, EIF3A-1, ATTIF3A1, T | 142 |
| Dark-2 | 293 | Background | AT4G11420 | Symbols: EIF3A, ATEIF3A-1, EIF3A-1, ATTIF3A1, T | 142 |
| Dark-2 | 294 | Background | AT1G26630 | Symbols: FBR12, ATELF5A-2, ELF5A-2   Eukaryot   | 142 |
| Dark-2 | 294 | Background | AT1G26630 | Symbols: FBR12, ATELF5A-2, ELF5A-2   Eukaryot   | 142 |
| Dark-2 | 295 | Background | AT1G23410 | Symbols:   Ribosomal protein S27a / Ubiquitin f | 140 |
| Dark-2 | 295 | Background | AT1G23410 | Symbols:   Ribosomal protein S27a / Ubiquitin f | 140 |
| Dark-2 | 295 | Background | AT1G23410 | Symbols:   Ribosomal protein S27a / Ubiquitin f | 140 |
| Dark-2 | 295 | Background | AT1G23410 | Symbols:   Ribosomal protein S27a / Ubiquitin f | 140 |
| Dark-2 | 296 | Background | AT2G01250 | Symbols:   Ribosomal protein L30/L7 family pro  | 139 |
| Dark-2 | 296 | Background | AT2G01250 | Symbols:   Ribosomal protein L30/L7 family pro  | 139 |
| Dark-2 | 296 | Background | AT2G01250 | Symbols:   Ribosomal protein L30/L7 family pro  | 139 |
| Dark-2 | 296 | Background | AT2G01250 | Symbols:   Ribosomal protein L30/L7 family pro  | 139 |
| Dark-2 | 296 | Background | AT2G01250 | Symbols:   Ribosomal protein L30/L7 family pro  | 139 |
| Dark-2 | 297 | Background | AT5G37510 | Symbols: EMB1467, CI76   NADH-ubiquinone de     | 138 |
| Dark-2 | 297 | Background | AT5G37510 | Symbols: EMB1467, CI76   NADH-ubiquinone de     | 138 |
| Dark-2 | 298 | Background | AT1G06220 | Symbols: MEE5, CLO, GFA1   Ribosomal protein    | 138 |
| Dark-2 | 298 | Background | AT1G06220 | Symbols: MEE5, CLO, GFA1   Ribosomal protein    | 138 |
| Dark-2 | 298 | Background | AT1G06220 | Symbols: MEE5, CLO, GFA1   Ribosomal protein    | 138 |
| Dark-2 | 298 | Background | AT1G06220 | Symbols: MEE5, CLO, GFA1   Ribosomal protein    | 138 |
| Dark-2 | 298 | Background | AT1G06220 | Symbols: MEE5, CLO, GFA1   Ribosomal protein    | 138 |
| Dark-2 | 299 | Background | AT2G28000 | Symbols: CPN60A, CH-CPN60A, SLP   chaperonir    | 137 |
| Dark-2 | 299 | Background | AT2G28000 | Symbols: CPN60A, CH-CPN60A, SLP   chaperonir    | 137 |
| Dark-2 | 299 | Background | AT2G28000 | Symbols: CPN60A, CH-CPN60A, SLP   chaperonir    | 137 |
| Dark-2 | 300 | Background | AT2G19490 | Symbols:   recA DNA recombination family prot   | 136 |
| Dark-2 | 300 | Background | AT2G19490 | Symbols:   recA DNA recombination family prot   | 136 |
| Dark-2 | 300 | Background | AT2G19490 | Symbols:   recA DNA recombination family prot   | 136 |
| Dark-2 | 301 | Background | AT1G72370 | Symbols: P40, AP40, RP40, RPSAA   40s ribosom   | 135 |
| Dark-2 | 301 | Background | AT1G72370 | Symbols: P40, AP40, RP40, RPSAA   40s ribosom   | 135 |
| Dark-2 | 301 | Background | AT1G72370 | Symbols: P40, AP40, RP40, RPSAA   40s ribosom   | 135 |
| Dark-2 | 302 | Background | AT4G27585 | Symbols:   SPFH/Band 7/PHB domain-contains      | 133 |
| Dark-2 | 302 | Background | AT4G27585 | Symbols:   SPFH/Band 7/PHB domain-contains      | 133 |
| Dark-2 | 302 | Background | AT4G27585 | Symbols:   SPFH/Band 7/PHB domain-contains      | 133 |
| Dark-2 | 302 | Background | AT4G27585 | Symbols:   SPFH/Band 7/PHB domain-contains      | 133 |
| Dark-2 | 303 | Background | AT3G52580 | Symbols:   Ribosomal protein S11 family protei  | 133 |
| Dark-2 | 303 | Background | AT3G52580 | Symbols:   Ribosomal protein S11 family protei  | 133 |
| Dark-2 | 303 | Background | AT3G52580 | Symbols:   Ribosomal protein S11 family protei  | 133 |

|        |     |                 |           |                                                   |     |
|--------|-----|-----------------|-----------|---------------------------------------------------|-----|
| Dark-2 | 304 | Background      | AT1G04480 | Symbols:   Ribosomal protein L14p/L23e family     | 132 |
| Dark-2 | 304 | Background      | AT1G04480 | Symbols:   Ribosomal protein L14p/L23e family     | 132 |
| Dark-2 | 305 | Background      | AT2G18330 | Symbols:   AAA-type ATPase family protein   ch    | 129 |
| Dark-2 | 305 | Background      | AT2G18330 | Symbols:   AAA-type ATPase family protein   ch    | 129 |
| Dark-2 | 306 | Background      | AT1G50200 | Symbols: ALATS, ACD   Alanyl-tRNA synthetase      | 128 |
| Dark-2 | 306 | Background      | AT1G50200 | Symbols: ALATS, ACD   Alanyl-tRNA synthetase      | 128 |
| Dark-2 | 307 | Background      | AT5G04130 | Symbols: GYRB2   DNA GYRASE B2   chr5:11220       | 127 |
| Dark-2 | 307 | Background      | AT5G04130 | Symbols: GYRB2   DNA GYRASE B2   chr5:11220       | 127 |
| Dark-2 | 308 | Background      | AT3G13300 | Symbols: VCS   Transducin/WD40 repeat-like su     | 127 |
| Dark-2 | 308 | Background      | AT3G13300 | Symbols: VCS   Transducin/WD40 repeat-like su     | 127 |
| Dark-2 | 308 | Background      | AT3G13300 | Symbols: VCS   Transducin/WD40 repeat-like su     | 127 |
| Dark-2 | 308 | Background      | AT3G13300 | Symbols: VCS   Transducin/WD40 repeat-like su     | 127 |
| Dark-2 | 308 | Background      | AT3G13300 | Symbols: VCS   Transducin/WD40 repeat-like su     | 127 |
| Dark-2 | 308 | Background      | AT3G13300 | Symbols: VCS   Transducin/WD40 repeat-like su     | 127 |
| Dark-2 | 309 | Background      | AT5G22060 | Symbols: ATJ2, J2   DNAJ homologue 2   chr5:75    | 127 |
| Dark-2 | 309 | Background      | AT5G22060 | Symbols: ATJ2, J2   DNAJ homologue 2   chr5:75    | 127 |
| Dark-2 | 309 | Background      | AT5G22060 | Symbols: ATJ2, J2   DNAJ homologue 2   chr5:75    | 127 |
| Dark-2 | 309 | Background      | AT5G22060 | Symbols: ATJ2, J2   DNAJ homologue 2   chr5:75    | 127 |
| Dark-2 | 310 | Background      | AT5G16300 | Symbols:   Vps51/Vps67 family (components of      | 126 |
| Dark-2 | 310 | Background      | AT5G16300 | Symbols:   Vps51/Vps67 family (components of      | 126 |
| Dark-2 | 311 | Table 1 Filtere | AT2G02100 | Symbols: LCR69, PDF2.2   low-molecular-weight     | 126 |
| Dark-2 | 311 | Table 1 Filtere | AT2G02100 | Symbols: LCR69, PDF2.2   low-molecular-weight     | 126 |
| Dark-2 | 312 | Background      | AT4G19490 | Symbols: ATVPS54, VPS54   VPS54   chr4:10616      | 125 |
| Dark-2 | 312 | Background      | AT4G19490 | Symbols: ATVPS54, VPS54   VPS54   chr4:10616      | 125 |
| Dark-2 | 313 | Background      | AT3G02260 | Symbols: BIG, DOC1, TIR3, UMB1, ASA1, LPR1, C     | 125 |
| Dark-2 | 313 | Background      | AT3G02260 | Symbols: BIG, DOC1, TIR3, UMB1, ASA1, LPR1, C     | 125 |
| Dark-2 | 314 | Background      | AT2G47650 | Symbols: UXS4   UDP-xylose synthase 4   chr2:1    | 125 |
| Dark-2 | 314 | Background      | AT2G47650 | Symbols: UXS4   UDP-xylose synthase 4   chr2:1    | 125 |
| Dark-2 | 315 | Background      | AT5G25780 | Symbols: EIF3B-2, EIF3B, ATEIF3B-2   eukaryotic   | 121 |
| Dark-2 | 315 | Background      | AT5G25780 | Symbols: EIF3B-2, EIF3B, ATEIF3B-2   eukaryotic   | 121 |
| Dark-2 | 315 | Background      | AT5G25780 | Symbols: EIF3B-2, EIF3B, ATEIF3B-2   eukaryotic   | 121 |
| Dark-2 | 316 | Background      | AT3G24830 | Symbols:   Ribosomal protein L13 family protein   | 121 |
| Dark-2 | 316 | Background      | AT3G24830 | Symbols:   Ribosomal protein L13 family protein   | 121 |
| Dark-2 | 317 | Background      | AT2G20800 | Symbols: NDB4   NAD(P)H dehydrogenase B4   c      | 121 |
| Dark-2 | 317 | Background      | AT2G20800 | Symbols: NDB4   NAD(P)H dehydrogenase B4   c      | 121 |
| Dark-2 | 318 | Background      | AT1G80070 | Symbols: SUS2, EMB33, EMB177, EMB14   Pre-r       | 120 |
| Dark-2 | 318 | Background      | AT1G80070 | Symbols: SUS2, EMB33, EMB177, EMB14   Pre-r       | 120 |
| Dark-2 | 319 | Background      | AT5G22770 | Symbols: alpha-ADR   alpha-adaptin   chr5:7579    | 120 |
| Dark-2 | 319 | Background      | AT5G22770 | Symbols: alpha-ADR   alpha-adaptin   chr5:7579    | 120 |
| Dark-2 | 320 | Background      | AT1G70320 | Symbols: UPL2   ubiquitin-protein ligase 2   chr1 | 119 |
| Dark-2 | 320 | Background      | AT1G70320 | Symbols: UPL2   ubiquitin-protein ligase 2   chr1 | 119 |
| Dark-2 | 321 | Background      | AT4G02030 | Symbols:   Vps51/Vps67 family (components of      | 119 |
| Dark-2 | 321 | Background      | AT4G02030 | Symbols:   Vps51/Vps67 family (components of      | 119 |
| Dark-2 | 322 | Table 1 Filtere | AT2G36200 | Symbols:   P-loop containing nucleoside triphos   | 118 |
| Dark-2 | 322 | Table 1 Filtere | AT2G36200 | Symbols:   P-loop containing nucleoside triphos   | 118 |
| Dark-2 | 322 | Table 1 Filtere | AT2G36200 | Symbols:   P-loop containing nucleoside triphos   | 118 |
| Dark-2 | 323 | Background      | AT5G62190 | Symbols: PRH75   DEAD box RNA helicase (PRH7      | 118 |
| Dark-2 | 323 | Background      | AT5G62190 | Symbols: PRH75   DEAD box RNA helicase (PRH7      | 118 |
| Dark-2 | 323 | Background      | AT5G62190 | Symbols: PRH75   DEAD box RNA helicase (PRH7      | 118 |
| Dark-2 | 324 | Background      | AT1G26830 | Symbols: CUL3A, ATCUL3A, ATCUL3, CUL3   culli     | 116 |
| Dark-2 | 324 | Background      | AT1G26830 | Symbols: CUL3A, ATCUL3A, ATCUL3, CUL3   culli     | 116 |
| Dark-2 | 325 | Background      | AT2G42740 | Symbols: RPL16A   ribosomal protein large subu    | 116 |
| Dark-2 | 325 | Background      | AT2G42740 | Symbols: RPL16A   ribosomal protein large subu    | 116 |
| Dark-2 | 325 | Background      | AT2G42740 | Symbols: RPL16A   ribosomal protein large subu    | 116 |
| Dark-2 | 326 | Background      | AT3G14990 | Symbols:   Class I glutamine amidotransferase-I   | 115 |
| Dark-2 | 326 | Background      | AT3G14990 | Symbols:   Class I glutamine amidotransferase-I   | 115 |
| Dark-2 | 326 | Background      | AT3G14990 | Symbols:   Class I glutamine amidotransferase-I   | 115 |
| Dark-2 | 327 | Background      | AT1G14320 | Symbols: SAC52, RPL10, RPL10A   Ribosomal prc     | 115 |

|        |     |            |           |                                                  |     |
|--------|-----|------------|-----------|--------------------------------------------------|-----|
| Dark-2 | 327 | Background | AT1G14320 | Symbols: SAC52, RPL10, RPL10A   Ribosomal pr     | 115 |
| Dark-2 | 328 | Background | AT3G58660 | Symbols:   Ribosomal protein L1p/L10e family     | 114 |
| Dark-2 | 328 | Background | AT3G58660 | Symbols:   Ribosomal protein L1p/L10e family     | 114 |
| Dark-2 | 329 | Background | AT1G07705 | Symbols:   NOT2 / NOT3 / NOT5 family   chr1:2    | 112 |
| Dark-2 | 329 | Background | AT1G07705 | Symbols:   NOT2 / NOT3 / NOT5 family   chr1:2    | 112 |
| Dark-2 | 330 | Background | AT2G27530 | Symbols: PGY1   Ribosomal protein L1p/L10e fa    | 112 |
| Dark-2 | 330 | Background | AT2G27530 | Symbols: PGY1   Ribosomal protein L1p/L10e fa    | 112 |
| Dark-2 | 331 | Background | AT1G24510 | Symbols:   TCP-1/cpn60 chaperonin family prot    | 110 |
| Dark-2 | 331 | Background | AT1G24510 | Symbols:   TCP-1/cpn60 chaperonin family prot    | 110 |
| Dark-2 | 332 | Background | AT4G12420 | Symbols: SKU5   Cupredoxin superfamily proteir   | 110 |
| Dark-2 | 332 | Background | AT4G12420 | Symbols: SKU5   Cupredoxin superfamily proteir   | 110 |
| Dark-2 | 332 | Background | AT4G12420 | Symbols: SKU5   Cupredoxin superfamily proteir   | 110 |
| Dark-2 | 332 | Background | AT4G12420 | Symbols: SKU5   Cupredoxin superfamily proteir   | 110 |
| Dark-2 | 333 | Background | AT5G05780 | Symbols: RPN8A, AE3, ATHMOV34   RP non-ATF       | 107 |
| Dark-2 | 333 | Background | AT5G05780 | Symbols: RPN8A, AE3, ATHMOV34   RP non-ATF       | 107 |
| Dark-2 | 333 | Background | AT5G05780 | Symbols: RPN8A, AE3, ATHMOV34   RP non-ATF       | 107 |
| Dark-2 | 333 | Background | AT5G05780 | Symbols: RPN8A, AE3, ATHMOV34   RP non-ATF       | 107 |
| Dark-2 | 334 | Background | AT5G52470 | Symbols: FIB1, FBR1, ATFIB1, ATFBR1, SKIP7   fit | 107 |
| Dark-2 | 334 | Background | AT5G52470 | Symbols: FIB1, FBR1, ATFIB1, ATFBR1, SKIP7   fit | 107 |
| Dark-2 | 334 | Background | AT5G52470 | Symbols: FIB1, FBR1, ATFIB1, ATFBR1, SKIP7   fit | 107 |
| Dark-2 | 335 | Background | AT1G71270 | Symbols: POK, TTD8, ATVPS52   Vps52 / Sac2 fa    | 107 |
| Dark-2 | 335 | Background | AT1G71270 | Symbols: POK, TTD8, ATVPS52   Vps52 / Sac2 fa    | 107 |
| Dark-2 | 335 | Background | AT1G71270 | Symbols: POK, TTD8, ATVPS52   Vps52 / Sac2 fa    | 107 |
| Dark-2 | 336 | Background | AT3G05560 | Symbols:   Ribosomal L22e protein family   chr:  | 106 |
| Dark-2 | 336 | Background | AT3G05560 | Symbols:   Ribosomal L22e protein family   chr:  | 106 |
| Dark-2 | 337 | Background | AT5G26360 | Symbols:   TCP-1/cpn60 chaperonin family prot    | 106 |
| Dark-2 | 337 | Background | AT5G26360 | Symbols:   TCP-1/cpn60 chaperonin family prot    | 106 |
| Dark-2 | 338 | Background | AT1G48900 | Symbols:   Signal recognition particle, SRP54 su | 103 |
| Dark-2 | 338 | Background | AT1G48900 | Symbols:   Signal recognition particle, SRP54 su | 103 |
| Dark-2 | 339 | Background | AT4G27640 | Symbols:   ARM repeat superfamily protein   cf   | 101 |
| Dark-2 | 339 | Background | AT4G27640 | Symbols:   ARM repeat superfamily protein   cf   | 101 |
| Dark-2 | 340 | Background | AT2G42520 | Symbols:   P-loop containing nucleoside triphos  | 99  |
| Dark-2 | 340 | Background | AT2G42520 | Symbols:   P-loop containing nucleoside triphos  | 99  |
| Dark-2 | 341 | Background | AT1G24300 | Symbols:   GYF domain-containing protein   chr   | 96  |
| Dark-2 | 341 | Background | AT1G24300 | Symbols:   GYF domain-containing protein   chr   | 96  |
| Dark-2 | 341 | Background | AT1G24300 | Symbols:   GYF domain-containing protein   chr   | 96  |
| Dark-2 | 342 | Background | AT5G60730 | Symbols:   Anion-transporting ATPase   chr5:24   | 96  |
| Dark-2 | 342 | Background | AT5G60730 | Symbols:   Anion-transporting ATPase   chr5:24   | 96  |
| Dark-2 | 343 | Background | AT3G42170 | Symbols:   BED zinc finger ;hAT family dimerisat | 95  |
| Dark-2 | 343 | Background | AT3G42170 | Symbols:   BED zinc finger ;hAT family dimerisat | 95  |
| Dark-2 | 344 | Background | AT1G50500 | Symbols: HIT1, ATVPS53, VPS53   Membrane tra     | 94  |
| Dark-2 | 344 | Background | AT1G50500 | Symbols: HIT1, ATVPS53, VPS53   Membrane tra     | 94  |
| Dark-2 | 344 | Background | AT1G50500 | Symbols: HIT1, ATVPS53, VPS53   Membrane tra     | 94  |
| Dark-2 | 345 | Background | AT1G01470 | Symbols: LEA14, LSR3   Late embryogenesis abu    | 94  |
| Dark-2 | 345 | Background | AT1G01470 | Symbols: LEA14, LSR3   Late embryogenesis abu    | 94  |
| Dark-2 | 346 | Background | AT1G79340 | Symbols: AtMC4, MC4   metacaspase 4   chr1:2     | 93  |
| Dark-2 | 346 | Background | AT1G79340 | Symbols: AtMC4, MC4   metacaspase 4   chr1:2     | 93  |
| Dark-2 | 347 | Background | AT2G05830 | Symbols:   NagB/RpiA/CoA transferase-like sup    | 93  |
| Dark-2 | 347 | Background | AT2G05830 | Symbols:   NagB/RpiA/CoA transferase-like sup    | 93  |
| Dark-2 | 348 | Background | ATCG00480 | Symbols: ATPB, PB   ATP synthase subunit beta    | 92  |
| Dark-2 | 348 | Background | ATCG00480 | Symbols: ATPB, PB   ATP synthase subunit beta    | 92  |
| Dark-2 | 349 | Background | AT1G51380 | Symbols:   DEA(D/H)-box RNA helicase family p    | 92  |
| Dark-2 | 349 | Background | AT1G51380 | Symbols:   DEA(D/H)-box RNA helicase family p    | 92  |
| Dark-2 | 350 | Background | AT5G45620 | Symbols:   Proteasome component (PCI) domai      | 92  |
| Dark-2 | 350 | Background | AT5G45620 | Symbols:   Proteasome component (PCI) domai      | 92  |
| Dark-2 | 351 | Background | AT3G56130 | Symbols:   biotin/lipoyl attachment domain-cor   | 90  |
| Dark-2 | 351 | Background | AT3G56130 | Symbols:   biotin/lipoyl attachment domain-cor   | 90  |
| Dark-2 | 352 | Background | AT3G61650 | Symbols: TUBG1   gamma-tubulin   chr3:22812f     | 90  |

|        |     |            |           |                                                    |    |
|--------|-----|------------|-----------|----------------------------------------------------|----|
| Dark-2 | 352 | Background | AT3G61650 | Symbols: TUBG1   gamma-tubulin   chr3:228120       | 90 |
| Dark-2 | 352 | Background | AT3G61650 | Symbols: TUBG1   gamma-tubulin   chr3:228120       | 90 |
| Dark-2 | 353 | Background | AT1G27400 | Symbols:   Ribosomal protein L22p/L17e family      | 89 |
| Dark-2 | 353 | Background | AT1G27400 | Symbols:   Ribosomal protein L22p/L17e family      | 89 |
| Dark-2 | 354 | Background | AT4G31700 | Symbols: RPS6, RPS6A   ribosomal protein S6   c    | 89 |
| Dark-2 | 354 | Background | AT4G31700 | Symbols: RPS6, RPS6A   ribosomal protein S6   c    | 89 |
| Dark-2 | 355 | Background | AT3G06400 | Symbols: CHR11   chromatin-remodeling protein      | 86 |
| Dark-2 | 355 | Background | AT3G06400 | Symbols: CHR11   chromatin-remodeling protein      | 86 |
| Dark-2 | 356 | Background | AT3G19820 | Symbols: DWF1, DIM, EVE1, DIM1, CBB1   cell e      | 85 |
| Dark-2 | 356 | Background | AT3G19820 | Symbols: DWF1, DIM, EVE1, DIM1, CBB1   cell e      | 85 |
| Dark-2 | 357 | Background | AT5G12470 | Symbols:   Protein of unknown function (DUF34      | 84 |
| Dark-2 | 357 | Background | AT5G12470 | Symbols:   Protein of unknown function (DUF34      | 84 |
| Dark-2 | 357 | Background | AT5G12470 | Symbols:   Protein of unknown function (DUF34      | 84 |
| Dark-2 | 358 | Background | AT4G19006 | Symbols:   Proteasome component (PCI) domai        | 84 |
| Dark-2 | 358 | Background | AT4G19006 | Symbols:   Proteasome component (PCI) domai        | 84 |
| Dark-2 | 359 | Background | AT4G25630 | Symbols: FIB2, ATFIB2   fibrillarin 2   chr4:13074 | 84 |
| Dark-2 | 359 | Background | AT4G25630 | Symbols: FIB2, ATFIB2   fibrillarin 2   chr4:13074 | 84 |
| Dark-2 | 359 | Background | AT4G25630 | Symbols: FIB2, ATFIB2   fibrillarin 2   chr4:13074 | 84 |
| Dark-2 | 360 | Background | AT3G18190 | Symbols:   TCP-1/cpn60 chaperonin family prot      | 82 |
| Dark-2 | 360 | Background | AT3G18190 | Symbols:   TCP-1/cpn60 chaperonin family prot      | 82 |
| Dark-2 | 360 | Background | AT3G18190 | Symbols:   TCP-1/cpn60 chaperonin family prot      | 82 |
| Dark-2 | 361 | Background | AT2G40510 | Symbols:   Ribosomal protein S26e family prote     | 81 |
| Dark-2 | 361 | Background | AT2G40510 | Symbols:   Ribosomal protein S26e family prote     | 81 |
| Dark-2 | 362 | Background | AT5G27770 | Symbols:   Ribosomal L22e protein family   chr!    | 81 |
| Dark-2 | 362 | Background | AT5G27770 | Symbols:   Ribosomal L22e protein family   chr!    | 81 |
| Dark-2 | 363 | Background | AT1G07890 | Symbols: APX1, MEE6, CS1, ATAPX1, ATAPX01          | 81 |
| Dark-2 | 363 | Background | AT1G07890 | Symbols: APX1, MEE6, CS1, ATAPX1, ATAPX01          | 81 |
| Dark-2 | 364 | Background | AT1G71380 | Symbols: ATGH9B3, ATCEL3, CEL3   cellulase 3       | 80 |
| Dark-2 | 364 | Background | AT1G71380 | Symbols: ATGH9B3, ATCEL3, CEL3   cellulase 3       | 80 |
| Dark-2 | 364 | Background | AT1G71380 | Symbols: ATGH9B3, ATCEL3, CEL3   cellulase 3       | 80 |
| Dark-2 | 364 | Background | AT1G71380 | Symbols: ATGH9B3, ATCEL3, CEL3   cellulase 3       | 80 |
| Dark-2 | 365 | Background | AT3G60770 | Symbols:   Ribosomal protein S13/S15   chr3:22     | 80 |
| Dark-2 | 365 | Background | AT3G60770 | Symbols:   Ribosomal protein S13/S15   chr3:22     | 80 |
| Dark-2 | 365 | Background | AT3G60770 | Symbols:   Ribosomal protein S13/S15   chr3:22     | 80 |
| Dark-2 | 366 | Background | AT2G43460 | Symbols:   Ribosomal L38e protein family   chr:    | 76 |
| Dark-2 | 366 | Background | AT2G43460 | Symbols:   Ribosomal L38e protein family   chr:    | 76 |
| Dark-2 | 367 | Background | AT3G11400 | Symbols: EIF3G1, ATEIF3G1   eukaryotic translat    | 75 |
| Dark-2 | 367 | Background | AT3G11400 | Symbols: EIF3G1, ATEIF3G1   eukaryotic translat    | 75 |
| Dark-2 | 368 | Background | AT1G80670 | Symbols:   Transducin/WD40 repeat-like superf      | 75 |
| Dark-2 | 368 | Background | AT1G80670 | Symbols:   Transducin/WD40 repeat-like superf      | 75 |
| Dark-2 | 369 | Background | AT5G42080 | Symbols: ADL1, ADL1A, AG68, DRP1A, RSW9, DL        | 74 |
| Dark-2 | 369 | Background | AT5G42080 | Symbols: ADL1, ADL1A, AG68, DRP1A, RSW9, DL        | 74 |
| Dark-2 | 370 | Background | AT2G32730 | Symbols:   26S proteasome regulatory complex       | 74 |
| Dark-2 | 370 | Background | AT2G32730 | Symbols:   26S proteasome regulatory complex       | 74 |
| Dark-2 | 370 | Background | AT2G32730 | Symbols:   26S proteasome regulatory complex       | 74 |
| Dark-2 | 371 | Background | AT1G50920 | Symbols:   Nucleolar GTP-binding protein   chr:    | 73 |
| Dark-2 | 371 | Background | AT1G50920 | Symbols:   Nucleolar GTP-binding protein   chr:    | 73 |
| Dark-2 | 372 | Background | AT3G01540 | Symbols: DRH1, ATDRH1   DEAD box RNA helica        | 73 |
| Dark-2 | 372 | Background | AT3G01540 | Symbols: DRH1, ATDRH1   DEAD box RNA helica        | 73 |
| Dark-2 | 373 | Background | AT2G37190 | Symbols:   Ribosomal protein L11 family proteii    | 73 |
| Dark-2 | 373 | Background | AT2G37190 | Symbols:   Ribosomal protein L11 family proteii    | 73 |
| Dark-2 | 374 | Background | AT1G12900 | Symbols: GAPA-2   glyceraldehyde 3-phosphate       | 72 |
| Dark-2 | 374 | Background | AT1G12900 | Symbols: GAPA-2   glyceraldehyde 3-phosphate       | 72 |
| Dark-2 | 375 | Background | AT3G46830 | Symbols: ATRAB11A, ATRABA2C, ATRAB-A2C, R/         | 72 |
| Dark-2 | 375 | Background | AT3G46830 | Symbols: ATRAB11A, ATRABA2C, ATRAB-A2C, R/         | 72 |
| Dark-2 | 375 | Background | AT3G46830 | Symbols: ATRAB11A, ATRABA2C, ATRAB-A2C, R/         | 72 |
| Dark-2 | 376 | Background | AT1G61990 | Symbols:   Mitochondrial transcription termina     | 72 |
| Dark-2 | 376 | Background | AT1G61990 | Symbols:   Mitochondrial transcription termina     | 72 |

































|         |     |                 |           |                                                  |     |
|---------|-----|-----------------|-----------|--------------------------------------------------|-----|
| Light-1 | 483 | Background      | AT5G18700 | Symbols: RUK, EMB3013   Protein kinase family    | 240 |
| Light-1 | 483 | Background      | AT5G18700 | Symbols: RUK, EMB3013   Protein kinase family    | 240 |
| Light-1 | 483 | Background      | AT5G18700 | Symbols: RUK, EMB3013   Protein kinase family    | 240 |
| Light-1 | 483 | Background      | AT5G18700 | Symbols: RUK, EMB3013   Protein kinase family    | 240 |
| Light-1 | 483 | Background      | AT5G18700 | Symbols: RUK, EMB3013   Protein kinase family    | 240 |
| Light-1 | 484 | Background      | AT3G13300 | Symbols: VCS   Transducin/WD40 repeat-like su    | 234 |
| Light-1 | 484 | Background      | AT3G13300 | Symbols: VCS   Transducin/WD40 repeat-like su    | 234 |
| Light-1 | 484 | Background      | AT3G13300 | Symbols: VCS   Transducin/WD40 repeat-like su    | 234 |
| Light-1 | 484 | Background      | AT3G13300 | Symbols: VCS   Transducin/WD40 repeat-like su    | 234 |
| Light-1 | 484 | Background      | AT3G13300 | Symbols: VCS   Transducin/WD40 repeat-like su    | 234 |
| Light-1 | 484 | Background      | AT3G13300 | Symbols: VCS   Transducin/WD40 repeat-like su    | 234 |
| Light-1 | 484 | Background      | AT3G13300 | Symbols: VCS   Transducin/WD40 repeat-like su    | 234 |
| Light-1 | 484 | Background      | AT3G13300 | Symbols: VCS   Transducin/WD40 repeat-like su    | 234 |
| Light-1 | 484 | Background      | AT3G13300 | Symbols: VCS   Transducin/WD40 repeat-like su    | 234 |
| Light-1 | 485 | Background      | AT5G08610 | Symbols:   P-loop containing nucleoside triphos  | 226 |
| Light-1 | 485 | Background      | AT5G08610 | Symbols:   P-loop containing nucleoside triphos  | 226 |
| Light-1 | 485 | Background      | AT5G08610 | Symbols:   P-loop containing nucleoside triphos  | 226 |
| Light-1 | 485 | Background      | AT5G08610 | Symbols:   P-loop containing nucleoside triphos  | 226 |
| Light-1 | 485 | Background      | AT5G08610 | Symbols:   P-loop containing nucleoside triphos  | 226 |
| Light-1 | 486 | Table 1 Filtere | AT2G36200 | Symbols:   P-loop containing nucleoside triphos  | 226 |
| Light-1 | 486 | Table 1 Filtere | AT2G36200 | Symbols:   P-loop containing nucleoside triphos  | 226 |
| Light-1 | 486 | Table 1 Filtere | AT2G36200 | Symbols:   P-loop containing nucleoside triphos  | 226 |
| Light-1 | 486 | Table 1 Filtere | AT2G36200 | Symbols:   P-loop containing nucleoside triphos  | 226 |
| Light-1 | 486 | Table 1 Filtere | AT2G36200 | Symbols:   P-loop containing nucleoside triphos  | 226 |
| Light-1 | 486 | Table 1 Filtere | AT2G36200 | Symbols:   P-loop containing nucleoside triphos  | 226 |
| Light-1 | 486 | Table 1 Filtere | AT2G36200 | Symbols:   P-loop containing nucleoside triphos  | 226 |
| Light-1 | 487 | Background      | AT1G79530 | Symbols: GAPCP-1   glyceraldehyde-3-phosphat     | 222 |
| Light-1 | 487 | Background      | AT1G79530 | Symbols: GAPCP-1   glyceraldehyde-3-phosphat     | 222 |
| Light-1 | 487 | Background      | AT1G79530 | Symbols: GAPCP-1   glyceraldehyde-3-phosphat     | 222 |
| Light-1 | 488 | Background      | AT5G26742 | Symbols: emb1138   DEAD box RNA helicase (Rf     | 219 |
| Light-1 | 488 | Background      | AT5G26742 | Symbols: emb1138   DEAD box RNA helicase (Rf     | 219 |
| Light-1 | 488 | Background      | AT5G26742 | Symbols: emb1138   DEAD box RNA helicase (Rf     | 219 |
| Light-1 | 488 | Background      | AT5G26742 | Symbols: emb1138   DEAD box RNA helicase (Rf     | 219 |
| Light-1 | 488 | Background      | AT5G26742 | Symbols: emb1138   DEAD box RNA helicase (Rf     | 219 |
| Light-1 | 488 | Background      | AT5G26742 | Symbols: emb1138   DEAD box RNA helicase (Rf     | 219 |
| Light-1 | 488 | Background      | AT5G26742 | Symbols: emb1138   DEAD box RNA helicase (Rf     | 219 |
| Light-1 | 488 | Background      | AT5G26742 | Symbols: emb1138   DEAD box RNA helicase (Rf     | 219 |
| Light-1 | 488 | Background      | AT5G26742 | Symbols: emb1138   DEAD box RNA helicase (Rf     | 219 |
| Light-1 | 488 | Background      | AT5G26742 | Symbols: emb1138   DEAD box RNA helicase (Rf     | 219 |
| Light-1 | 489 | Background      | AT1G29150 | Symbols: ATS9, RPN6   non-ATPase subunit 9   c   | 218 |
| Light-1 | 489 | Background      | AT1G29150 | Symbols: ATS9, RPN6   non-ATPase subunit 9   c   | 218 |
| Light-1 | 489 | Background      | AT1G29150 | Symbols: ATS9, RPN6   non-ATPase subunit 9   c   | 218 |
| Light-1 | 489 | Background      | AT1G29150 | Symbols: ATS9, RPN6   non-ATPase subunit 9   c   | 218 |
| Light-1 | 490 | Background      | AT1G24510 | Symbols:   TCP-1/cpn60 chaperonin family prot    | 213 |
| Light-1 | 490 | Background      | AT1G24510 | Symbols:   TCP-1/cpn60 chaperonin family prot    | 213 |
| Light-1 | 490 | Background      | AT1G24510 | Symbols:   TCP-1/cpn60 chaperonin family prot    | 213 |
| Light-1 | 490 | Background      | AT1G24510 | Symbols:   TCP-1/cpn60 chaperonin family prot    | 213 |
| Light-1 | 491 | Table 1 Filtere | AT3G16810 | Symbols: APUM24, PUM24   pumilio 24   chr3:5     | 212 |
| Light-1 | 491 | Table 1 Filtere | AT3G16810 | Symbols: APUM24, PUM24   pumilio 24   chr3:5     | 212 |
| Light-1 | 491 | Table 1 Filtere | AT3G16810 | Symbols: APUM24, PUM24   pumilio 24   chr3:5     | 212 |
| Light-1 | 492 | Background      | AT5G58290 | Symbols: RPT3   regulatory particle triple-A ATP | 211 |
| Light-1 | 492 | Background      | AT5G58290 | Symbols: RPT3   regulatory particle triple-A ATP | 211 |
| Light-1 | 492 | Background      | AT5G58290 | Symbols: RPT3   regulatory particle triple-A ATP | 211 |
| Light-1 | 492 | Background      | AT5G58290 | Symbols: RPT3   regulatory particle triple-A ATP | 211 |
| Light-1 | 492 | Background      | AT5G58290 | Symbols: RPT3   regulatory particle triple-A ATP | 211 |
| Light-1 | 492 | Background      | AT5G58290 | Symbols: RPT3   regulatory particle triple-A ATP | 211 |
| Light-1 | 492 | Background      | AT5G58290 | Symbols: RPT3   regulatory particle triple-A ATP | 211 |
| Light-1 | 493 | Background      | AT3G11830 | Symbols:   TCP-1/cpn60 chaperonin family prot    | 206 |
| Light-1 | 493 | Background      | AT3G11830 | Symbols:   TCP-1/cpn60 chaperonin family prot    | 206 |
| Light-1 | 493 | Background      | AT3G11830 | Symbols:   TCP-1/cpn60 chaperonin family prot    | 206 |
| Light-1 | 494 | Background      | AT1G59610 | Symbols: ADL3, CF1, DRP2B, DL3   dynamin-like    | 202 |

|         |     |            |           |                                                   |     |
|---------|-----|------------|-----------|---------------------------------------------------|-----|
| Light-1 | 494 | Background | AT1G59610 | Symbols: ADL3, CF1, DRP2B, DL3   dynamin-like     | 202 |
| Light-1 | 494 | Background | AT1G59610 | Symbols: ADL3, CF1, DRP2B, DL3   dynamin-like     | 202 |
| Light-1 | 494 | Background | AT1G59610 | Symbols: ADL3, CF1, DRP2B, DL3   dynamin-like     | 202 |
| Light-1 | 495 | Background | AT5G12370 | Symbols: SEC10   exocyst complex component s      | 201 |
| Light-1 | 495 | Background | AT5G12370 | Symbols: SEC10   exocyst complex component s      | 201 |
| Light-1 | 495 | Background | AT5G12370 | Symbols: SEC10   exocyst complex component s      | 201 |
| Light-1 | 495 | Background | AT5G12370 | Symbols: SEC10   exocyst complex component s      | 201 |
| Light-1 | 495 | Background | AT5G12370 | Symbols: SEC10   exocyst complex component s      | 201 |
| Light-1 | 495 | Background | AT5G12370 | Symbols: SEC10   exocyst complex component s      | 201 |
| Light-1 | 496 | Background | AT3G57940 | Symbols:   Domain of unknown function (DUF1       | 201 |
| Light-1 | 496 | Background | AT3G57940 | Symbols:   Domain of unknown function (DUF1       | 201 |
| Light-1 | 496 | Background | AT3G57940 | Symbols:   Domain of unknown function (DUF1       | 201 |
| Light-1 | 496 | Background | AT3G57940 | Symbols:   Domain of unknown function (DUF1       | 201 |
| Light-1 | 497 | Background | AT1G01470 | Symbols: LEA14, LSR3   Late embryogenesis abu     | 197 |
| Light-1 | 497 | Background | AT1G01470 | Symbols: LEA14, LSR3   Late embryogenesis abu     | 197 |
| Light-1 | 497 | Background | AT1G01470 | Symbols: LEA14, LSR3   Late embryogenesis abu     | 197 |
| Light-1 | 498 | Background | AT2G14120 | Symbols: DRP3B   dynamin related protein   chr    | 197 |
| Light-1 | 498 | Background | AT2G14120 | Symbols: DRP3B   dynamin related protein   chr    | 197 |
| Light-1 | 498 | Background | AT2G14120 | Symbols: DRP3B   dynamin related protein   chr    | 197 |
| Light-1 | 498 | Background | AT2G14120 | Symbols: DRP3B   dynamin related protein   chr    | 197 |
| Light-1 | 498 | Background | AT2G14120 | Symbols: DRP3B   dynamin related protein   chr    | 197 |
| Light-1 | 499 | Background | AT2G46520 | Symbols:   cellular apoptosis susceptibility prot | 196 |
| Light-1 | 499 | Background | AT2G46520 | Symbols:   cellular apoptosis susceptibility prot | 196 |
| Light-1 | 499 | Background | AT2G46520 | Symbols:   cellular apoptosis susceptibility prot | 196 |
| Light-1 | 499 | Background | AT2G46520 | Symbols:   cellular apoptosis susceptibility prot | 196 |
| Light-1 | 499 | Background | AT2G46520 | Symbols:   cellular apoptosis susceptibility prot | 196 |
| Light-1 | 499 | Background | AT2G46520 | Symbols:   cellular apoptosis susceptibility prot | 196 |
| Light-1 | 500 | Background | AT5G56000 | Symbols: Hsp81.4, AtHsp90.4   HEAT SHOCK PR       | 196 |
| Light-1 | 500 | Background | AT5G56000 | Symbols: Hsp81.4, AtHsp90.4   HEAT SHOCK PR       | 196 |
| Light-1 | 500 | Background | AT5G56000 | Symbols: Hsp81.4, AtHsp90.4   HEAT SHOCK PR       | 196 |
| Light-1 | 500 | Background | AT5G56000 | Symbols: Hsp81.4, AtHsp90.4   HEAT SHOCK PR       | 196 |
| Light-1 | 500 | Background | AT5G56000 | Symbols: Hsp81.4, AtHsp90.4   HEAT SHOCK PR       | 196 |
| Light-1 | 500 | Background | AT5G56000 | Symbols: Hsp81.4, AtHsp90.4   HEAT SHOCK PR       | 196 |
| Light-1 | 501 | Background | AT3G44110 | Symbols: ATJ3, ATJ   DNAJ homologue 3   chr3::    | 193 |
| Light-1 | 501 | Background | AT3G44110 | Symbols: ATJ3, ATJ   DNAJ homologue 3   chr3::    | 193 |
| Light-1 | 501 | Background | AT3G44110 | Symbols: ATJ3, ATJ   DNAJ homologue 3   chr3::    | 193 |
| Light-1 | 502 | Background | AT4G38630 | Symbols: RPN10, MCB1, ATMCB1, MBP1   regul        | 192 |
| Light-1 | 502 | Background | AT4G38630 | Symbols: RPN10, MCB1, ATMCB1, MBP1   regul        | 192 |
| Light-1 | 503 | Background | AT4G23460 | Symbols:   Adaptin family protein   chr4:12243    | 192 |
| Light-1 | 503 | Background | AT4G23460 | Symbols:   Adaptin family protein   chr4:12243    | 192 |
| Light-1 | 503 | Background | AT4G23460 | Symbols:   Adaptin family protein   chr4:12243    | 192 |
| Light-1 | 504 | Background | AT2G15620 | Symbols: NIR1, NIR, ATHNIR   nitrite reductase 1  | 190 |
| Light-1 | 504 | Background | AT2G15620 | Symbols: NIR1, NIR, ATHNIR   nitrite reductase 1  | 190 |
| Light-1 | 504 | Background | AT2G15620 | Symbols: NIR1, NIR, ATHNIR   nitrite reductase 1  | 190 |
| Light-1 | 504 | Background | AT2G15620 | Symbols: NIR1, NIR, ATHNIR   nitrite reductase 1  | 190 |
| Light-1 | 504 | Background | AT2G15620 | Symbols: NIR1, NIR, ATHNIR   nitrite reductase 1  | 190 |
| Light-1 | 505 | Background | AT3G20050 | Symbols: ATTCP-1, TCP-1   T-complex protein 1     | 189 |
| Light-1 | 505 | Background | AT3G20050 | Symbols: ATTCP-1, TCP-1   T-complex protein 1     | 189 |
| Light-1 | 505 | Background | AT3G20050 | Symbols: ATTCP-1, TCP-1   T-complex protein 1     | 189 |
| Light-1 | 505 | Background | AT3G20050 | Symbols: ATTCP-1, TCP-1   T-complex protein 1     | 189 |
| Light-1 | 506 | Background | AT3G14990 | Symbols:   Class I glutamine amidotransferase-I   | 189 |
| Light-1 | 506 | Background | AT3G14990 | Symbols:   Class I glutamine amidotransferase-I   | 189 |
| Light-1 | 506 | Background | AT3G14990 | Symbols:   Class I glutamine amidotransferase-I   | 189 |
| Light-1 | 506 | Background | AT3G14990 | Symbols:   Class I glutamine amidotransferase-I   | 189 |
| Light-1 | 506 | Background | AT3G14990 | Symbols:   Class I glutamine amidotransferase-I   | 189 |
| Light-1 | 507 | Background | AT4G27585 | Symbols:   SPFH/Band 7/PHB domain-containin       | 188 |
| Light-1 | 507 | Background | AT4G27585 | Symbols:   SPFH/Band 7/PHB domain-containin       | 188 |
| Light-1 | 507 | Background | AT4G27585 | Symbols:   SPFH/Band 7/PHB domain-containin       | 188 |

|         |     |            |           |                                                  |     |
|---------|-----|------------|-----------|--------------------------------------------------|-----|
| Light-1 | 507 | Background | AT4G27585 | Symbols:   SPFH/Band 7/PHB domain-containin      | 188 |
| Light-1 | 507 | Background | AT4G27585 | Symbols:   SPFH/Band 7/PHB domain-containin      | 188 |
| Light-1 | 507 | Background | AT4G27585 | Symbols:   SPFH/Band 7/PHB domain-containin      | 188 |
| Light-1 | 507 | Background | AT4G27585 | Symbols:   SPFH/Band 7/PHB domain-containin      | 188 |
| Light-1 | 508 | Background | AT2G18330 | Symbols:   AAA-type ATPase family protein   ch   | 185 |
| Light-1 | 508 | Background | AT2G18330 | Symbols:   AAA-type ATPase family protein   ch   | 185 |
| Light-1 | 508 | Background | AT2G18330 | Symbols:   AAA-type ATPase family protein   ch   | 185 |
| Light-1 | 508 | Background | AT2G18330 | Symbols:   AAA-type ATPase family protein   ch   | 185 |
| Light-1 | 509 | Background | AT1G62020 | Symbols:   Coatomer, alpha subunit   chr1:229:   | 181 |
| Light-1 | 509 | Background | AT1G62020 | Symbols:   Coatomer, alpha subunit   chr1:229:   | 181 |
| Light-1 | 509 | Background | AT1G62020 | Symbols:   Coatomer, alpha subunit   chr1:229:   | 181 |
| Light-1 | 509 | Background | AT1G62020 | Symbols:   Coatomer, alpha subunit   chr1:229:   | 181 |
| Light-1 | 509 | Background | AT1G62020 | Symbols:   Coatomer, alpha subunit   chr1:229:   | 181 |
| Light-1 | 510 | Background | AT4G11420 | Symbols: EIF3A, ATEIF3A-1, EIF3A-1, ATTIF3A1, T  | 181 |
| Light-1 | 510 | Background | AT4G11420 | Symbols: EIF3A, ATEIF3A-1, EIF3A-1, ATTIF3A1, T  | 181 |
| Light-1 | 510 | Background | AT4G11420 | Symbols: EIF3A, ATEIF3A-1, EIF3A-1, ATTIF3A1, T  | 181 |
| Light-1 | 510 | Background | AT4G11420 | Symbols: EIF3A, ATEIF3A-1, EIF3A-1, ATTIF3A1, T  | 181 |
| Light-1 | 510 | Background | AT4G11420 | Symbols: EIF3A, ATEIF3A-1, EIF3A-1, ATTIF3A1, T  | 181 |
| Light-1 | 510 | Background | AT4G11420 | Symbols: EIF3A, ATEIF3A-1, EIF3A-1, ATTIF3A1, T  | 181 |
| Light-1 | 510 | Background | AT4G11420 | Symbols: EIF3A, ATEIF3A-1, EIF3A-1, ATTIF3A1, T  | 181 |
| Light-1 | 510 | Background | AT4G11420 | Symbols: EIF3A, ATEIF3A-1, EIF3A-1, ATTIF3A1, T  | 181 |
| Light-1 | 511 | Background | AT4G24820 | Symbols:   26S proteasome, regulatory subunit    | 181 |
| Light-1 | 511 | Background | AT4G24820 | Symbols:   26S proteasome, regulatory subunit    | 181 |
| Light-1 | 511 | Background | AT4G24820 | Symbols:   26S proteasome, regulatory subunit    | 181 |
| Light-1 | 511 | Background | AT4G24820 | Symbols:   26S proteasome, regulatory subunit    | 181 |
| Light-1 | 512 | Background | AT2G33210 | Symbols: HSP60-2   heat shock protein 60-2   cf  | 175 |
| Light-1 | 512 | Background | AT2G33210 | Symbols: HSP60-2   heat shock protein 60-2   cf  | 175 |
| Light-1 | 512 | Background | AT2G33210 | Symbols: HSP60-2   heat shock protein 60-2   cf  | 175 |
| Light-1 | 512 | Background | AT2G33210 | Symbols: HSP60-2   heat shock protein 60-2   cf  | 175 |
| Light-1 | 513 | Background | AT1G02690 | Symbols: IMPA-6   importin alpha isoform 6   cf  | 175 |
| Light-1 | 513 | Background | AT1G02690 | Symbols: IMPA-6   importin alpha isoform 6   cf  | 175 |
| Light-1 | 513 | Background | AT1G02690 | Symbols: IMPA-6   importin alpha isoform 6   cf  | 175 |
| Light-1 | 513 | Background | AT1G02690 | Symbols: IMPA-6   importin alpha isoform 6   cf  | 175 |
| Light-1 | 513 | Background | AT1G02690 | Symbols: IMPA-6   importin alpha isoform 6   cf  | 175 |
| Light-1 | 513 | Background | AT1G02690 | Symbols: IMPA-6   importin alpha isoform 6   cf  | 175 |
| Light-1 | 514 | Background | AT5G47690 | Symbols:   binding   chr5:19317899-19327014      | 172 |
| Light-1 | 514 | Background | AT5G47690 | Symbols:   binding   chr5:19317899-19327014      | 172 |
| Light-1 | 514 | Background | AT5G47690 | Symbols:   binding   chr5:19317899-19327014      | 172 |
| Light-1 | 515 | Background | AT3G05590 | Symbols: RPL18   ribosomal protein L18   chr3:1  | 168 |
| Light-1 | 515 | Background | AT3G05590 | Symbols: RPL18   ribosomal protein L18   chr3:1  | 168 |
| Light-1 | 515 | Background | AT3G05590 | Symbols: RPL18   ribosomal protein L18   chr3:1  | 168 |
| Light-1 | 516 | Background | AT1G80270 | Symbols: PPR596   PENTATRICOPEPTIDE REPEA`       | 166 |
| Light-1 | 516 | Background | AT1G80270 | Symbols: PPR596   PENTATRICOPEPTIDE REPEA`       | 166 |
| Light-1 | 516 | Background | AT1G80270 | Symbols: PPR596   PENTATRICOPEPTIDE REPEA`       | 166 |
| Light-1 | 516 | Background | AT1G80270 | Symbols: PPR596   PENTATRICOPEPTIDE REPEA`       | 166 |
| Light-1 | 516 | Background | AT1G80270 | Symbols: PPR596   PENTATRICOPEPTIDE REPEA`       | 166 |
| Light-1 | 517 | Background | AT5G53480 | Symbols:   ARM repeat superfamily protein   cf   | 166 |
| Light-1 | 517 | Background | AT5G53480 | Symbols:   ARM repeat superfamily protein   cf   | 166 |
| Light-1 | 517 | Background | AT5G53480 | Symbols:   ARM repeat superfamily protein   cf   | 166 |
| Light-1 | 517 | Background | AT5G53480 | Symbols:   ARM repeat superfamily protein   cf   | 166 |
| Light-1 | 518 | Background | AT4G34450 | Symbols:   coatomer gamma-2 subunit, putativ     | 162 |
| Light-1 | 518 | Background | AT4G34450 | Symbols:   coatomer gamma-2 subunit, putativ     | 162 |
| Light-1 | 518 | Background | AT4G34450 | Symbols:   coatomer gamma-2 subunit, putativ     | 162 |
| Light-1 | 518 | Background | AT4G34450 | Symbols:   coatomer gamma-2 subunit, putativ     | 162 |
| Light-1 | 519 | Background | AT5G20890 | Symbols:   TCP-1/cpn60 chaperonin family prot    | 161 |
| Light-1 | 519 | Background | AT5G20890 | Symbols:   TCP-1/cpn60 chaperonin family prot    | 161 |
| Light-1 | 519 | Background | AT5G20890 | Symbols:   TCP-1/cpn60 chaperonin family prot    | 161 |
| Light-1 | 519 | Background | AT5G20890 | Symbols:   TCP-1/cpn60 chaperonin family prot    | 161 |
| Light-1 | 520 | Background | AT3G13160 | Symbols:   Tetratricopeptide repeat (TPR)-like s | 160 |
| Light-1 | 520 | Background | AT3G13160 | Symbols:   Tetratricopeptide repeat (TPR)-like s | 160 |

|         |     |            |           |                                                  |     |
|---------|-----|------------|-----------|--------------------------------------------------|-----|
| Light-1 | 521 | Background | AT4G27640 | Symbols:   ARM repeat superfamily protein   cf   | 160 |
| Light-1 | 521 | Background | AT4G27640 | Symbols:   ARM repeat superfamily protein   cf   | 160 |
| Light-1 | 522 | Background | AT5G62740 | Symbols: HIR1, ATHIR1   SPFH/Band 7/PHB dom      | 159 |
| Light-1 | 522 | Background | AT5G62740 | Symbols: HIR1, ATHIR1   SPFH/Band 7/PHB dom      | 159 |
| Light-1 | 522 | Background | AT5G62740 | Symbols: HIR1, ATHIR1   SPFH/Band 7/PHB dom      | 159 |
| Light-1 | 522 | Background | AT5G62740 | Symbols: HIR1, ATHIR1   SPFH/Band 7/PHB dom      | 159 |
| Light-1 | 522 | Background | AT5G62740 | Symbols: HIR1, ATHIR1   SPFH/Band 7/PHB dom      | 159 |
| Light-1 | 523 | Background | AT5G37510 | Symbols: EMB1467, CI76   NADH-ubiquinone de      | 156 |
| Light-1 | 523 | Background | AT5G37510 | Symbols: EMB1467, CI76   NADH-ubiquinone de      | 156 |
| Light-1 | 524 | Background | AT3G05060 | Symbols:   NOP56-like pre RNA processing ribo    | 156 |
| Light-1 | 524 | Background | AT3G05060 | Symbols:   NOP56-like pre RNA processing ribo    | 156 |
| Light-1 | 525 | Background | AT1G06220 | Symbols: MEE5, CLO, GFA1   Ribosomal protein     | 153 |
| Light-1 | 525 | Background | AT1G06220 | Symbols: MEE5, CLO, GFA1   Ribosomal protein     | 153 |
| Light-1 | 525 | Background | AT1G06220 | Symbols: MEE5, CLO, GFA1   Ribosomal protein     | 153 |
| Light-1 | 525 | Background | AT1G06220 | Symbols: MEE5, CLO, GFA1   Ribosomal protein     | 153 |
| Light-1 | 525 | Background | AT1G06220 | Symbols: MEE5, CLO, GFA1   Ribosomal protein     | 153 |
| Light-1 | 525 | Background | AT1G06220 | Symbols: MEE5, CLO, GFA1   Ribosomal protein     | 153 |
| Light-1 | 525 | Background | AT1G06220 | Symbols: MEE5, CLO, GFA1   Ribosomal protein     | 153 |
| Light-1 | 526 | Background | AT1G04270 | Symbols: RPS15   cytosolic ribosomal protein S1  | 153 |
| Light-1 | 526 | Background | AT1G04270 | Symbols: RPS15   cytosolic ribosomal protein S1  | 153 |
| Light-1 | 527 | Background | AT3G09630 | Symbols:   Ribosomal protein L4/L1 family   chr  | 152 |
| Light-1 | 527 | Background | AT3G09630 | Symbols:   Ribosomal protein L4/L1 family   chr  | 152 |
| Light-1 | 527 | Background | AT3G09630 | Symbols:   Ribosomal protein L4/L1 family   chr  | 152 |
| Light-1 | 528 | Background | AT3G61650 | Symbols: TUBG1   gamma-tubulin   chr3:228120     | 152 |
| Light-1 | 528 | Background | AT3G61650 | Symbols: TUBG1   gamma-tubulin   chr3:228120     | 152 |
| Light-1 | 529 | Background | AT5G49910 | Symbols: CPHSC70-2EAT SHOCK PROTEIN 70-2, I      | 151 |
| Light-1 | 529 | Background | AT5G49910 | Symbols: CPHSC70-2EAT SHOCK PROTEIN 70-2, I      | 151 |
| Light-1 | 529 | Background | AT5G49910 | Symbols: CPHSC70-2EAT SHOCK PROTEIN 70-2, I      | 151 |
| Light-1 | 529 | Background | AT5G49910 | Symbols: CPHSC70-2EAT SHOCK PROTEIN 70-2, I      | 151 |
| Light-1 | 529 | Background | AT5G49910 | Symbols: CPHSC70-2EAT SHOCK PROTEIN 70-2, I      | 151 |
| Light-1 | 529 | Background | AT5G49910 | Symbols: CPHSC70-2EAT SHOCK PROTEIN 70-2, I      | 151 |
| Light-1 | 530 | Background | AT5G19760 | Symbols:   Mitochondrial substrate carrier fami  | 151 |
| Light-1 | 530 | Background | AT5G19760 | Symbols:   Mitochondrial substrate carrier fami  | 151 |
| Light-1 | 530 | Background | AT5G19760 | Symbols:   Mitochondrial substrate carrier fami  | 151 |
| Light-1 | 531 | Background | AT2G03270 | Symbols:   DNA-binding protein, putative   chr2  | 148 |
| Light-1 | 531 | Background | AT2G03270 | Symbols:   DNA-binding protein, putative   chr2  | 148 |
| Light-1 | 531 | Background | AT2G03270 | Symbols:   DNA-binding protein, putative   chr2  | 148 |
| Light-1 | 532 | Background | AT1G69840 | Symbols:   SPFH/Band 7/PHB domain-contains       | 148 |
| Light-1 | 532 | Background | AT1G69840 | Symbols:   SPFH/Band 7/PHB domain-contains       | 148 |
| Light-1 | 532 | Background | AT1G69840 | Symbols:   SPFH/Band 7/PHB domain-contains       | 148 |
| Light-1 | 532 | Background | AT1G69840 | Symbols:   SPFH/Band 7/PHB domain-contains       | 148 |
| Light-1 | 533 | Background | AT5G17020 | Symbols: XPO1A, ATRCM1, ATXPO1, XPO1, HIT2       | 146 |
| Light-1 | 533 | Background | AT5G17020 | Symbols: XPO1A, ATRCM1, ATXPO1, XPO1, HIT2       | 146 |
| Light-1 | 533 | Background | AT5G17020 | Symbols: XPO1A, ATRCM1, ATXPO1, XPO1, HIT2       | 146 |
| Light-1 | 533 | Background | AT5G17020 | Symbols: XPO1A, ATRCM1, ATXPO1, XPO1, HIT2       | 146 |
| Light-1 | 533 | Background | AT5G17020 | Symbols: XPO1A, ATRCM1, ATXPO1, XPO1, HIT2       | 146 |
| Light-1 | 534 | Background | AT1G02080 | Symbols:   transcription regulators   chr1:37330 | 146 |
| Light-1 | 534 | Background | AT1G02080 | Symbols:   transcription regulators   chr1:37330 | 146 |
| Light-1 | 534 | Background | AT1G02080 | Symbols:   transcription regulators   chr1:37330 | 146 |
| Light-1 | 534 | Background | AT1G02080 | Symbols:   transcription regulators   chr1:37330 | 146 |
| Light-1 | 534 | Background | AT1G02080 | Symbols:   transcription regulators   chr1:37330 | 146 |
| Light-1 | 535 | Background | AT1G04810 | Symbols:   26S proteasome regulatory complex     | 146 |
| Light-1 | 535 | Background | AT1G04810 | Symbols:   26S proteasome regulatory complex     | 146 |
| Light-1 | 535 | Background | AT1G04810 | Symbols:   26S proteasome regulatory complex     | 146 |
| Light-1 | 535 | Background | AT1G04810 | Symbols:   26S proteasome regulatory complex     | 146 |
| Light-1 | 535 | Background | AT1G04810 | Symbols:   26S proteasome regulatory complex     | 146 |
| Light-1 | 536 | Background | AT1G36180 | Symbols: ACC2   acetyl-CoA carboxylase 2   chr1  | 143 |
| Light-1 | 536 | Background | AT1G36180 | Symbols: ACC2   acetyl-CoA carboxylase 2   chr1  | 143 |
| Light-1 | 537 | Background | AT5G62190 | Symbols: PRH75   DEAD box RNA helicase (PRH7     | 143 |
| Light-1 | 537 | Background | AT5G62190 | Symbols: PRH75   DEAD box RNA helicase (PRH7     | 143 |

|         |     |                 |           |                                                   |     |
|---------|-----|-----------------|-----------|---------------------------------------------------|-----|
| Light-1 | 537 | Background      | AT5G62190 | Symbols: PRH75   DEAD box RNA helicase (PRH7      | 143 |
| Light-1 | 537 | Background      | AT5G62190 | Symbols: PRH75   DEAD box RNA helicase (PRH7      | 143 |
| Light-1 | 538 | Background      | AT1G70320 | Symbols: UPL2   ubiquitin-protein ligase 2   chr1 | 142 |
| Light-1 | 538 | Background      | AT1G70320 | Symbols: UPL2   ubiquitin-protein ligase 2   chr1 | 142 |
| Light-1 | 539 | Background      | AT3G42170 | Symbols:   BED zinc finger ;hAT family dimerisat  | 142 |
| Light-1 | 539 | Background      | AT3G42170 | Symbols:   BED zinc finger ;hAT family dimerisat  | 142 |
| Light-1 | 540 | Background      | AT5G36230 | Symbols:   ARM repeat superfamily protein   cf    | 142 |
| Light-1 | 540 | Background      | AT5G36230 | Symbols:   ARM repeat superfamily protein   cf    | 142 |
| Light-1 | 540 | Background      | AT5G36230 | Symbols:   ARM repeat superfamily protein   cf    | 142 |
| Light-1 | 541 | Background      | AT3G10690 | Symbols: GYRA   DNA GYRASE A   chr3:3339612       | 141 |
| Light-1 | 541 | Background      | AT3G10690 | Symbols: GYRA   DNA GYRASE A   chr3:3339612       | 141 |
| Light-1 | 541 | Background      | AT3G10690 | Symbols: GYRA   DNA GYRASE A   chr3:3339612       | 141 |
| Light-1 | 542 | Background      | AT5G05010 | Symbols:   clathrin adaptor complexes medium      | 140 |
| Light-1 | 542 | Background      | AT5G05010 | Symbols:   clathrin adaptor complexes medium      | 140 |
| Light-1 | 543 | Background      | AT5G16300 | Symbols:   Vps51/Vps67 family (components of      | 138 |
| Light-1 | 543 | Background      | AT5G16300 | Symbols:   Vps51/Vps67 family (components of      | 138 |
| Light-1 | 543 | Background      | AT5G16300 | Symbols:   Vps51/Vps67 family (components of      | 138 |
| Light-1 | 544 | Background      | AT1G23410 | Symbols:   Ribosomal protein S27a / Ubiquitin f   | 137 |
| Light-1 | 544 | Background      | AT1G23410 | Symbols:   Ribosomal protein S27a / Ubiquitin f   | 137 |
| Light-1 | 544 | Background      | AT1G23410 | Symbols:   Ribosomal protein S27a / Ubiquitin f   | 137 |
| Light-1 | 545 | Background      | AT1G20200 | Symbols: EMB2719, HAP15   PAM domain (PCI/        | 134 |
| Light-1 | 545 | Background      | AT1G20200 | Symbols: EMB2719, HAP15   PAM domain (PCI/        | 134 |
| Light-1 | 545 | Background      | AT1G20200 | Symbols: EMB2719, HAP15   PAM domain (PCI/        | 134 |
| Light-1 | 545 | Background      | AT1G20200 | Symbols: EMB2719, HAP15   PAM domain (PCI/        | 134 |
| Light-1 | 545 | Background      | AT1G20200 | Symbols: EMB2719, HAP15   PAM domain (PCI/        | 134 |
| Light-1 | 545 | Background      | AT1G20200 | Symbols: EMB2719, HAP15   PAM domain (PCI/        | 134 |
| Light-1 | 545 | Background      | AT1G20200 | Symbols: EMB2719, HAP15   PAM domain (PCI/        | 134 |
| Light-1 | 546 | Background      | AT2G36620 | Symbols: RPL24A   ribosomal protein L24   chr2    | 133 |
| Light-1 | 546 | Background      | AT2G36620 | Symbols: RPL24A   ribosomal protein L24   chr2    | 133 |
| Light-1 | 547 | Background      | AT2G04030 | Symbols: CR88, EMB1956, HSP90.5, Hsp88.1, At      | 132 |
| Light-1 | 547 | Background      | AT2G04030 | Symbols: CR88, EMB1956, HSP90.5, Hsp88.1, At      | 132 |
| Light-1 | 547 | Background      | AT2G04030 | Symbols: CR88, EMB1956, HSP90.5, Hsp88.1, At      | 132 |
| Light-1 | 548 | Background      | AT1G23180 | Symbols:   ARM repeat superfamily protein   cf    | 131 |
| Light-1 | 548 | Background      | AT1G23180 | Symbols:   ARM repeat superfamily protein   cf    | 131 |
| Light-1 | 548 | Background      | AT1G23180 | Symbols:   ARM repeat superfamily protein   cf    | 131 |
| Light-1 | 549 | Background      | AT2G32730 | Symbols:   26S proteasome regulatory complex      | 130 |
| Light-1 | 549 | Background      | AT2G32730 | Symbols:   26S proteasome regulatory complex      | 130 |
| Light-1 | 549 | Background      | AT2G32730 | Symbols:   26S proteasome regulatory complex      | 130 |
| Light-1 | 549 | Background      | AT2G32730 | Symbols:   26S proteasome regulatory complex      | 130 |
| Light-1 | 550 | Background      | AT1G33120 | Symbols:   Ribosomal protein L6 family   chr1:1   | 130 |
| Light-1 | 550 | Background      | AT1G33120 | Symbols:   Ribosomal protein L6 family   chr1:1   | 130 |
| Light-1 | 550 | Background      | AT1G33120 | Symbols:   Ribosomal protein L6 family   chr1:1   | 130 |
| Light-1 | 551 | Table 1 Filtere | AT2G02100 | Symbols: LCR69, PDF2.2   low-molecular-weight     | 127 |
| Light-1 | 551 | Table 1 Filtere | AT2G02100 | Symbols: LCR69, PDF2.2   low-molecular-weight     | 127 |
| Light-1 | 552 | Background      | AT2G37190 | Symbols:   Ribosomal protein L11 family protei    | 126 |
| Light-1 | 552 | Background      | AT2G37190 | Symbols:   Ribosomal protein L11 family protei    | 126 |
| Light-1 | 553 | Background      | AT5G22770 | Symbols: alpha-ADR   alpha-adaptin   chr5:7579    | 126 |
| Light-1 | 553 | Background      | AT5G22770 | Symbols: alpha-ADR   alpha-adaptin   chr5:7579    | 126 |
| Light-1 | 553 | Background      | AT5G22770 | Symbols: alpha-ADR   alpha-adaptin   chr5:7579    | 126 |
| Light-1 | 553 | Background      | AT5G22770 | Symbols: alpha-ADR   alpha-adaptin   chr5:7579    | 126 |
| Light-1 | 554 | Background      | AT3G15590 | Symbols:   Tetratricopeptide repeat (TPR)-like s  | 125 |
| Light-1 | 554 | Background      | AT3G15590 | Symbols:   Tetratricopeptide repeat (TPR)-like s  | 125 |
| Light-1 | 555 | Background      | AT3G59020 | Symbols:   ARM repeat superfamily protein   cf    | 125 |
| Light-1 | 555 | Background      | AT3G59020 | Symbols:   ARM repeat superfamily protein   cf    | 125 |
| Light-1 | 555 | Background      | AT3G59020 | Symbols:   ARM repeat superfamily protein   cf    | 125 |
| Light-1 | 555 | Background      | AT3G59020 | Symbols:   ARM repeat superfamily protein   cf    | 125 |
| Light-1 | 556 | Background      | AT2G31610 | Symbols:   Ribosomal protein S3 family protein    | 125 |
| Light-1 | 556 | Background      | AT2G31610 | Symbols:   Ribosomal protein S3 family protein    | 125 |
| Light-1 | 556 | Background      | AT2G31610 | Symbols:   Ribosomal protein S3 family protein    | 125 |

|         |     |            |           |                                                               |     |
|---------|-----|------------|-----------|---------------------------------------------------------------|-----|
| Light-1 | 557 | Background | AT5G15610 | Symbols:   Proteasome component (PCI) domain                  | 123 |
| Light-1 | 558 | Background | AT1G10630 | Symbols: ATARFA1F, ARFA1F   ADP-ribosylation                  | 122 |
| Light-1 | 558 | Background | AT1G10630 | Symbols: ATARFA1F, ARFA1F   ADP-ribosylation                  | 122 |
| Light-1 | 559 | Background | AT2G42520 | Symbols:   P-loop containing nucleoside triphosphate          | 121 |
| Light-1 | 559 | Background | AT2G42520 | Symbols:   P-loop containing nucleoside triphosphate          | 121 |
| Light-1 | 559 | Background | AT2G42520 | Symbols:   P-loop containing nucleoside triphosphate          | 121 |
| Light-1 | 560 | Background | AT3G12050 | Symbols:   Aha1 domain-containing protein   chlorophyll       | 121 |
| Light-1 | 560 | Background | AT3G12050 | Symbols:   Aha1 domain-containing protein   chlorophyll       | 121 |
| Light-1 | 560 | Background | AT3G12050 | Symbols:   Aha1 domain-containing protein   chlorophyll       | 121 |
| Light-1 | 561 | Background | AT4G01100 | Symbols: ADNT1   adenine nucleotide transport                 | 121 |
| Light-1 | 561 | Background | AT4G01100 | Symbols: ADNT1   adenine nucleotide transport                 | 121 |
| Light-1 | 562 | Background | AT1G42970 | Symbols: GAPB   glyceraldehyde-3-phosphate dehydrogenase      | 120 |
| Light-1 | 562 | Background | AT1G42970 | Symbols: GAPB   glyceraldehyde-3-phosphate dehydrogenase      | 120 |
| Light-1 | 563 | Background | AT1G01960 | Symbols: EDA10   SEC7-like guanine nucleotide exchange factor | 118 |
| Light-1 | 563 | Background | AT1G01960 | Symbols: EDA10   SEC7-like guanine nucleotide exchange factor | 118 |
| Light-1 | 563 | Background | AT1G01960 | Symbols: EDA10   SEC7-like guanine nucleotide exchange factor | 118 |
| Light-1 | 564 | Background | AT5G50850 | Symbols: MAB1   Transketolase family protein   chlorophyll    | 118 |
| Light-1 | 564 | Background | AT5G50850 | Symbols: MAB1   Transketolase family protein   chlorophyll    | 118 |
| Light-1 | 564 | Background | AT5G50850 | Symbols: MAB1   Transketolase family protein   chlorophyll    | 118 |
| Light-1 | 565 | Background | AT3G11510 | Symbols:   Ribosomal protein S11 family protein               | 117 |
| Light-1 | 565 | Background | AT3G11510 | Symbols:   Ribosomal protein S11 family protein               | 117 |
| Light-1 | 565 | Background | AT3G11510 | Symbols:   Ribosomal protein S11 family protein               | 117 |
| Light-1 | 566 | Background | AT2G01250 | Symbols:   Ribosomal protein L30/L7 family protein            | 116 |
| Light-1 | 566 | Background | AT2G01250 | Symbols:   Ribosomal protein L30/L7 family protein            | 116 |
| Light-1 | 566 | Background | AT2G01250 | Symbols:   Ribosomal protein L30/L7 family protein            | 116 |
| Light-1 | 567 | Background | AT2G05830 | Symbols:   NagB/RpiA/CoA transferase-like superfamily         | 114 |
| Light-1 | 567 | Background | AT2G05830 | Symbols:   NagB/RpiA/CoA transferase-like superfamily         | 114 |
| Light-1 | 568 | Background | AT1G64520 | Symbols: RPN12a   regulatory particle non-ATPase              | 114 |
| Light-1 | 568 | Background | AT1G64520 | Symbols: RPN12a   regulatory particle non-ATPase              | 114 |
| Light-1 | 569 | Background | AT1G74470 | Symbols:   Pyridine nucleotide-disulphide oxidoreductase      | 110 |
| Light-1 | 569 | Background | AT1G74470 | Symbols:   Pyridine nucleotide-disulphide oxidoreductase      | 110 |
| Light-1 | 570 | Background | AT1G72440 | Symbols: EDA25, SWA2   CCAAT-binding factor   chlorophyll     | 110 |
| Light-1 | 570 | Background | AT1G72440 | Symbols: EDA25, SWA2   CCAAT-binding factor   chlorophyll     | 110 |
| Light-1 | 571 | Background | AT2G36250 | Symbols: FTSZ2-1, ATFTSZ2-1   Tubulin/FtsZ family             | 109 |
| Light-1 | 571 | Background | AT2G36250 | Symbols: FTSZ2-1, ATFTSZ2-1   Tubulin/FtsZ family             | 109 |
| Light-1 | 571 | Background | AT2G36250 | Symbols: FTSZ2-1, ATFTSZ2-1   Tubulin/FtsZ family             | 109 |
| Light-1 | 572 | Background | AT5G08620 | Symbols: STRS2, ATRH25   DEA(D/H)-box RNA hairpin             | 109 |
| Light-1 | 572 | Background | AT5G08620 | Symbols: STRS2, ATRH25   DEA(D/H)-box RNA hairpin             | 109 |
| Light-1 | 572 | Background | AT5G08620 | Symbols: STRS2, ATRH25   DEA(D/H)-box RNA hairpin             | 109 |
| Light-1 | 572 | Background | AT5G08620 | Symbols: STRS2, ATRH25   DEA(D/H)-box RNA hairpin             | 109 |
| Light-1 | 573 | Background | AT1G24300 | Symbols:   GYF domain-containing protein   chlorophyll        | 107 |
| Light-1 | 573 | Background | AT1G24300 | Symbols:   GYF domain-containing protein   chlorophyll        | 107 |
| Light-1 | 573 | Background | AT1G24300 | Symbols:   GYF domain-containing protein   chlorophyll        | 107 |
| Light-1 | 574 | Background | AT1G23280 | Symbols:   MAK16 protein-related   chr1:82608                 | 107 |
| Light-1 | 574 | Background | AT1G23280 | Symbols:   MAK16 protein-related   chr1:82608                 | 107 |
| Light-1 | 575 | Background | AT1G67930 | Symbols:   Golgi transport complex protein-related            | 106 |
| Light-1 | 575 | Background | AT1G67930 | Symbols:   Golgi transport complex protein-related            | 106 |
| Light-1 | 576 | Background | AT5G20290 | Symbols:   Ribosomal protein S8e family protein               | 106 |
| Light-1 | 576 | Background | AT5G20290 | Symbols:   Ribosomal protein S8e family protein               | 106 |
| Light-1 | 577 | Background | AT1G18450 | Symbols: ATARP4, ARP4   actin-related protein 4               | 105 |
| Light-1 | 577 | Background | AT1G18450 | Symbols: ATARP4, ARP4   actin-related protein 4               | 105 |
| Light-1 | 578 | Background | AT5G43780 | Symbols: APS4   Pseudouridine synthase/archae                 | 103 |
| Light-1 | 578 | Background | AT5G43780 | Symbols: APS4   Pseudouridine synthase/archae                 | 103 |
| Light-1 | 578 | Background | AT5G43780 | Symbols: APS4   Pseudouridine synthase/archae                 | 103 |
| Light-1 | 578 | Background | AT5G43780 | Symbols: APS4   Pseudouridine synthase/archae                 | 103 |
| Light-1 | 579 | Background | AT2G40730 | Symbols:   Protein kinase family protein with ATPase          | 102 |
| Light-1 | 579 | Background | AT2G40730 | Symbols:   Protein kinase family protein with ATPase          | 102 |
| Light-1 | 580 | Background | AT1G51710 | Symbols: UBP6, ATUBP6   ubiquitin-specific protease           | 101 |

|         |     |            |           |                                                   |     |
|---------|-----|------------|-----------|---------------------------------------------------|-----|
| Light-1 | 580 | Background | AT1G51710 | Symbols: UBP6, ATUBP6   ubiquitin-specific prot   | 101 |
| Light-1 | 580 | Background | AT1G51710 | Symbols: UBP6, ATUBP6   ubiquitin-specific prot   | 101 |
| Light-1 | 581 | Background | AT3G60240 | Symbols: EIF4G, CUM2   eukaryotic translation i   | 101 |
| Light-1 | 581 | Background | AT3G60240 | Symbols: EIF4G, CUM2   eukaryotic translation i   | 101 |
| Light-1 | 582 | Background | AT5G09840 | Symbols:   Putative endonuclease or glycosyl hy   | 101 |
| Light-1 | 582 | Background | AT5G09840 | Symbols:   Putative endonuclease or glycosyl hy   | 101 |
| Light-1 | 583 | Background | AT1G80070 | Symbols: SUS2, EMB33, EMB177, EMB14   Pre-r       | 100 |
| Light-1 | 583 | Background | AT1G80070 | Symbols: SUS2, EMB33, EMB177, EMB14   Pre-r       | 100 |
| Light-1 | 583 | Background | AT1G80070 | Symbols: SUS2, EMB33, EMB177, EMB14   Pre-r       | 100 |
| Light-1 | 583 | Background | AT1G80070 | Symbols: SUS2, EMB33, EMB177, EMB14   Pre-r       | 100 |
| Light-1 | 583 | Background | AT1G80070 | Symbols: SUS2, EMB33, EMB177, EMB14   Pre-r       | 100 |
| Light-1 | 584 | Background | AT5G16390 | Symbols: CAC1, CAC1A, BCCP, BCCP1   chloropla     | 99  |
| Light-1 | 584 | Background | AT5G16390 | Symbols: CAC1, CAC1A, BCCP, BCCP1   chloropla     | 99  |
| Light-1 | 584 | Background | AT5G16390 | Symbols: CAC1, CAC1A, BCCP, BCCP1   chloropla     | 99  |
| Light-1 | 585 | Background | AT3G13290 | Symbols: VCR   varicose-related   chr3:4297529    | 99  |
| Light-1 | 585 | Background | AT3G13290 | Symbols: VCR   varicose-related   chr3:4297529    | 99  |
| Light-1 | 585 | Background | AT3G13290 | Symbols: VCR   varicose-related   chr3:4297529    | 99  |
| Light-1 | 586 | Background | AT5G10470 | Symbols: KCA1, KAC1   kinesin like protein for ac | 95  |
| Light-1 | 586 | Background | AT5G10470 | Symbols: KCA1, KAC1   kinesin like protein for ac | 95  |
| Light-1 | 587 | Background | AT5G27640 | Symbols: TIF3B1, EIF3B, ATEIF3B-1, EIF3B-1, ATT   | 94  |
| Light-1 | 587 | Background | AT5G27640 | Symbols: TIF3B1, EIF3B, ATEIF3B-1, EIF3B-1, ATT   | 94  |
| Light-1 | 587 | Background | AT5G27640 | Symbols: TIF3B1, EIF3B, ATEIF3B-1, EIF3B-1, ATT   | 94  |
| Light-1 | 588 | Background | AT1G72370 | Symbols: P40, AP40, RP40, RPSAA   40s ribosom     | 94  |
| Light-1 | 588 | Background | AT1G72370 | Symbols: P40, AP40, RP40, RPSAA   40s ribosom     | 94  |
| Light-1 | 589 | Background | AT5G18620 | Symbols: CHR17   chromatin remodeling factor1     | 93  |
| Light-1 | 589 | Background | AT5G18620 | Symbols: CHR17   chromatin remodeling factor1     | 93  |
| Light-1 | 589 | Background | AT5G18620 | Symbols: CHR17   chromatin remodeling factor1     | 93  |
| Light-1 | 589 | Background | AT5G18620 | Symbols: CHR17   chromatin remodeling factor1     | 93  |
| Light-1 | 590 | Background | AT1G15480 | Symbols:   Tetratricopeptide repeat (TPR)-like s  | 93  |
| Light-1 | 590 | Background | AT1G15480 | Symbols:   Tetratricopeptide repeat (TPR)-like s  | 93  |
| Light-1 | 591 | Background | AT3G18600 | Symbols:   P-loop containing nucleoside triphos   | 93  |
| Light-1 | 591 | Background | AT3G18600 | Symbols:   P-loop containing nucleoside triphos   | 93  |
| Light-1 | 591 | Background | AT3G18600 | Symbols:   P-loop containing nucleoside triphos   | 93  |
| Light-1 | 592 | Background | AT5G05780 | Symbols: RPN8A, AE3, ATHMOV34   RP non-ATF        | 89  |
| Light-1 | 592 | Background | AT5G05780 | Symbols: RPN8A, AE3, ATHMOV34   RP non-ATF        | 89  |
| Light-1 | 593 | Background | AT1G58380 | Symbols: XW6   Ribosomal protein S5 family prc    | 88  |
| Light-1 | 593 | Background | AT1G58380 | Symbols: XW6   Ribosomal protein S5 family prc    | 88  |
| Light-1 | 594 | Background | AT4G31480 | Symbols:   Coatomer, beta subunit   chr4:1526     | 88  |
| Light-1 | 594 | Background | AT4G31480 | Symbols:   Coatomer, beta subunit   chr4:1526     | 88  |
| Light-1 | 595 | Background | AT2G40010 | Symbols:   Ribosomal protein L10 family proteii   | 87  |
| Light-1 | 595 | Background | AT2G40010 | Symbols:   Ribosomal protein L10 family proteii   | 87  |
| Light-1 | 596 | Background | AT1G52360 | Symbols:   Coatomer, beta~ subunit   chr1:194     | 87  |
| Light-1 | 596 | Background | AT1G52360 | Symbols:   Coatomer, beta~ subunit   chr1:194     | 87  |
| Light-1 | 597 | Background | AT5G25754 | Symbols:   RNA polymerase I-associated factor     | 81  |
| Light-1 | 597 | Background | AT5G25754 | Symbols:   RNA polymerase I-associated factor     | 81  |
| Light-1 | 598 | Background | AT1G71820 | Symbols: SEC6   SEC6   chr1:27010022-2701674      | 78  |
| Light-1 | 598 | Background | AT1G71820 | Symbols: SEC6   SEC6   chr1:27010022-2701674      | 78  |
| Light-1 | 598 | Background | AT1G71820 | Symbols: SEC6   SEC6   chr1:27010022-2701674      | 78  |
| Light-1 | 599 | Background | AT2G46280 | Symbols: TRIP-1, TIF311   TGF-beta receptor inte  | 78  |
| Light-1 | 599 | Background | AT2G46280 | Symbols: TRIP-1, TIF311   TGF-beta receptor inte  | 78  |
| Light-1 | 600 | Background | AT5G64420 | Symbols:   DNA polymerase V family   chr5:257     | 78  |
| Light-1 | 601 | Background | AT3G10270 | Symbols: GYRB1   DNA GYRASE B1   chr3:31738       | 77  |
| Light-1 | 601 | Background | AT3G10270 | Symbols: GYRB1   DNA GYRASE B1   chr3:31738       | 77  |
| Light-1 | 601 | Background | AT3G10270 | Symbols: GYRB1   DNA GYRASE B1   chr3:31738       | 77  |
| Light-1 | 602 | Background | AT1G71380 | Symbols: ATGH9B3, ATCEL3, CEL3   cellulase 3      | 76  |
| Light-1 | 602 | Background | AT1G71380 | Symbols: ATGH9B3, ATCEL3, CEL3   cellulase 3      | 76  |
| Light-1 | 603 | Background | AT1G50200 | Symbols: ALATS, ACD   Alanyl-tRNA synthetase      | 76  |
| Light-1 | 603 | Background | AT1G50200 | Symbols: ALATS, ACD   Alanyl-tRNA synthetase      | 76  |













|         |                |           |                                                  |     |
|---------|----------------|-----------|--------------------------------------------------|-----|
| Light-2 | 655 Background | AT5G09810 | Symbols: ACT7   actin 7   chr5:3052809-305422    | 281 |
| Light-2 | 655 Background | AT5G09810 | Symbols: ACT7   actin 7   chr5:3052809-305422    | 281 |
| Light-2 | 655 Background | AT5G09810 | Symbols: ACT7   actin 7   chr5:3052809-305422    | 281 |
| Light-2 | 655 Background | AT5G09810 | Symbols: ACT7   actin 7   chr5:3052809-305422    | 281 |
| Light-2 | 656 Background | AT1G52670 | Symbols:   Single hybrid motif superfamily prot  | 277 |
| Light-2 | 656 Background | AT1G52670 | Symbols:   Single hybrid motif superfamily prot  | 277 |
| Light-2 | 656 Background | AT1G52670 | Symbols:   Single hybrid motif superfamily prot  | 277 |
| Light-2 | 657 Background | AT4G02930 | Symbols:   GTP binding Elongation factor Tu fan  | 254 |
| Light-2 | 657 Background | AT4G02930 | Symbols:   GTP binding Elongation factor Tu fan  | 254 |
| Light-2 | 657 Background | AT4G02930 | Symbols:   GTP binding Elongation factor Tu fan  | 254 |
| Light-2 | 657 Background | AT4G02930 | Symbols:   GTP binding Elongation factor Tu fan  | 254 |
| Light-2 | 657 Background | AT4G02930 | Symbols:   GTP binding Elongation factor Tu fan  | 254 |
| Light-2 | 658 Background | AT2G44060 | Symbols:   Late embryogenesis abundant prote     | 248 |
| Light-2 | 658 Background | AT2G44060 | Symbols:   Late embryogenesis abundant prote     | 248 |
| Light-2 | 658 Background | AT2G44060 | Symbols:   Late embryogenesis abundant prote     | 248 |
| Light-2 | 658 Background | AT2G44060 | Symbols:   Late embryogenesis abundant prote     | 248 |
| Light-2 | 658 Background | AT2G44060 | Symbols:   Late embryogenesis abundant prote     | 248 |
| Light-2 | 658 Background | AT2G44060 | Symbols:   Late embryogenesis abundant prote     | 248 |
| Light-2 | 659 Background | AT2G37270 | Symbols: ATRPS5B, RPS5B   ribosomal protein 5    | 247 |
| Light-2 | 659 Background | AT2G37270 | Symbols: ATRPS5B, RPS5B   ribosomal protein 5    | 247 |
| Light-2 | 659 Background | AT2G37270 | Symbols: ATRPS5B, RPS5B   ribosomal protein 5    | 247 |
| Light-2 | 659 Background | AT2G37270 | Symbols: ATRPS5B, RPS5B   ribosomal protein 5    | 247 |
| Light-2 | 660 Background | AT2G17130 | Symbols: IDH2, IDH-II   isocitrate dehydrogenas  | 247 |
| Light-2 | 660 Background | AT2G17130 | Symbols: IDH2, IDH-II   isocitrate dehydrogenas  | 247 |
| Light-2 | 660 Background | AT2G17130 | Symbols: IDH2, IDH-II   isocitrate dehydrogenas  | 247 |
| Light-2 | 660 Background | AT2G17130 | Symbols: IDH2, IDH-II   isocitrate dehydrogenas  | 247 |
| Light-2 | 660 Background | AT2G17130 | Symbols: IDH2, IDH-II   isocitrate dehydrogenas  | 247 |
| Light-2 | 660 Background | AT2G17130 | Symbols: IDH2, IDH-II   isocitrate dehydrogenas  | 247 |
| Light-2 | 661 Background | AT1G56070 | Symbols: LOS1   Ribosomal protein S5/Elongatic   | 245 |
| Light-2 | 661 Background | AT1G56070 | Symbols: LOS1   Ribosomal protein S5/Elongatic   | 245 |
| Light-2 | 661 Background | AT1G56070 | Symbols: LOS1   Ribosomal protein S5/Elongatic   | 245 |
| Light-2 | 661 Background | AT1G56070 | Symbols: LOS1   Ribosomal protein S5/Elongatic   | 245 |
| Light-2 | 662 Background | AT2G20140 | Symbols:   AAA-type ATPase family protein   ch   | 241 |
| Light-2 | 662 Background | AT2G20140 | Symbols:   AAA-type ATPase family protein   ch   | 241 |
| Light-2 | 662 Background | AT2G20140 | Symbols:   AAA-type ATPase family protein   ch   | 241 |
| Light-2 | 662 Background | AT2G20140 | Symbols:   AAA-type ATPase family protein   ch   | 241 |
| Light-2 | 663 Background | AT3G48870 | Symbols: ATCLPC, ATHSP93-III, HSP93-III   Clp A` | 233 |
| Light-2 | 663 Background | AT3G48870 | Symbols: ATCLPC, ATHSP93-III, HSP93-III   Clp A` | 233 |
| Light-2 | 663 Background | AT3G48870 | Symbols: ATCLPC, ATHSP93-III, HSP93-III   Clp A` | 233 |
| Light-2 | 663 Background | AT3G48870 | Symbols: ATCLPC, ATHSP93-III, HSP93-III   Clp A` | 233 |
| Light-2 | 663 Background | AT3G48870 | Symbols: ATCLPC, ATHSP93-III, HSP93-III   Clp A` | 233 |
| Light-2 | 663 Background | AT3G48870 | Symbols: ATCLPC, ATHSP93-III, HSP93-III   Clp A` | 233 |
| Light-2 | 663 Background | AT3G48870 | Symbols: ATCLPC, ATHSP93-III, HSP93-III   Clp A` | 233 |
| Light-2 | 663 Background | AT3G48870 | Symbols: ATCLPC, ATHSP93-III, HSP93-III   Clp A` | 233 |
| Light-2 | 663 Background | AT3G48870 | Symbols: ATCLPC, ATHSP93-III, HSP93-III   Clp A` | 233 |
| Light-2 | 664 Background | AT3G61650 | Symbols: TUBG1   gamma-tubulin   chr3:228126     | 226 |
| Light-2 | 664 Background | AT3G61650 | Symbols: TUBG1   gamma-tubulin   chr3:228126     | 226 |
| Light-2 | 664 Background | AT3G61650 | Symbols: TUBG1   gamma-tubulin   chr3:228126     | 226 |
| Light-2 | 664 Background | AT3G61650 | Symbols: TUBG1   gamma-tubulin   chr3:228126     | 226 |
| Light-2 | 664 Background | AT3G61650 | Symbols: TUBG1   gamma-tubulin   chr3:228126     | 226 |
| Light-2 | 664 Background | AT3G61650 | Symbols: TUBG1   gamma-tubulin   chr3:228126     | 226 |
| Light-2 | 664 Background | AT3G61650 | Symbols: TUBG1   gamma-tubulin   chr3:228126     | 226 |
| Light-2 | 665 Background | AT4G16143 | Symbols: IMPA-2   importin alpha isoform 2   cl  | 209 |
| Light-2 | 665 Background | AT4G16143 | Symbols: IMPA-2   importin alpha isoform 2   cl  | 209 |
| Light-2 | 665 Background | AT4G16143 | Symbols: IMPA-2   importin alpha isoform 2   cl  | 209 |
| Light-2 | 665 Background | AT4G16143 | Symbols: IMPA-2   importin alpha isoform 2   cl  | 209 |
| Light-2 | 665 Background | AT4G16143 | Symbols: IMPA-2   importin alpha isoform 2   cl  | 209 |
| Light-2 | 666 Background | AT5G20890 | Symbols:   TCP-1/cpn60 chaperonin family prot    | 199 |
| Light-2 | 666 Background | AT5G20890 | Symbols:   TCP-1/cpn60 chaperonin family prot    | 199 |
| Light-2 | 666 Background | AT5G20890 | Symbols:   TCP-1/cpn60 chaperonin family prot    | 199 |

|         |     |            |           |                                                  |     |
|---------|-----|------------|-----------|--------------------------------------------------|-----|
| Light-2 | 666 | Background | AT5G20890 | Symbols:   TCP-1/cpn60 chaperonin family prot    | 199 |
| Light-2 | 667 | Background | AT1G72370 | Symbols: P40, AP40, RP40, RPSAA   40s ribosom    | 185 |
| Light-2 | 667 | Background | AT1G72370 | Symbols: P40, AP40, RP40, RPSAA   40s ribosom    | 185 |
| Light-2 | 667 | Background | AT1G72370 | Symbols: P40, AP40, RP40, RPSAA   40s ribosom    | 185 |
| Light-2 | 667 | Background | AT1G72370 | Symbols: P40, AP40, RP40, RPSAA   40s ribosom    | 185 |
| Light-2 | 668 | Background | AT5G28540 | Symbols: BIP1   heat shock protein 70 (Hsp 70) f | 173 |
| Light-2 | 668 | Background | AT5G28540 | Symbols: BIP1   heat shock protein 70 (Hsp 70) f | 173 |
| Light-2 | 668 | Background | AT5G28540 | Symbols: BIP1   heat shock protein 70 (Hsp 70) f | 173 |
| Light-2 | 668 | Background | AT5G28540 | Symbols: BIP1   heat shock protein 70 (Hsp 70) f | 173 |
| Light-2 | 668 | Background | AT5G28540 | Symbols: BIP1   heat shock protein 70 (Hsp 70) f | 173 |
| Light-2 | 669 | Background | AT3G08580 | Symbols: AAC1   ADP/ATP carrier 1   chr3:2605:   | 171 |
| Light-2 | 669 | Background | AT3G08580 | Symbols: AAC1   ADP/ATP carrier 1   chr3:2605:   | 171 |
| Light-2 | 669 | Background | AT3G08580 | Symbols: AAC1   ADP/ATP carrier 1   chr3:2605:   | 171 |
| Light-2 | 669 | Background | AT3G08580 | Symbols: AAC1   ADP/ATP carrier 1   chr3:2605:   | 171 |
| Light-2 | 669 | Background | AT3G08580 | Symbols: AAC1   ADP/ATP carrier 1   chr3:2605:   | 171 |
| Light-2 | 669 | Background | AT3G08580 | Symbols: AAC1   ADP/ATP carrier 1   chr3:2605:   | 171 |
| Light-2 | 669 | Background | AT3G08580 | Symbols: AAC1   ADP/ATP carrier 1   chr3:2605:   | 171 |
| Light-2 | 670 | Background | AT2G37620 | Symbols: ACT1, AAc1   actin 1   chr2:15779761-   | 169 |
| Light-2 | 670 | Background | AT2G37620 | Symbols: ACT1, AAc1   actin 1   chr2:15779761-   | 169 |
| Light-2 | 670 | Background | AT2G37620 | Symbols: ACT1, AAc1   actin 1   chr2:15779761-   | 169 |
| Light-2 | 670 | Background | AT2G37620 | Symbols: ACT1, AAc1   actin 1   chr2:15779761-   | 169 |
| Light-2 | 670 | Background | AT2G37620 | Symbols: ACT1, AAc1   actin 1   chr2:15779761-   | 169 |
| Light-2 | 670 | Background | AT2G37620 | Symbols: ACT1, AAc1   actin 1   chr2:15779761-   | 169 |
| Light-2 | 670 | Background | AT2G37620 | Symbols: ACT1, AAc1   actin 1   chr2:15779761-   | 169 |
| Light-2 | 670 | Background | AT2G37620 | Symbols: ACT1, AAc1   actin 1   chr2:15779761-   | 169 |
| Light-2 | 670 | Background | AT2G37620 | Symbols: ACT1, AAc1   actin 1   chr2:15779761-   | 169 |
| Light-2 | 671 | Background | AT5G13490 | Symbols: AAC2   ADP/ATP carrier 2   chr5:43360   | 169 |
| Light-2 | 671 | Background | AT5G13490 | Symbols: AAC2   ADP/ATP carrier 2   chr5:43360   | 169 |
| Light-2 | 671 | Background | AT5G13490 | Symbols: AAC2   ADP/ATP carrier 2   chr5:43360   | 169 |
| Light-2 | 671 | Background | AT5G13490 | Symbols: AAC2   ADP/ATP carrier 2   chr5:43360   | 169 |
| Light-2 | 671 | Background | AT5G13490 | Symbols: AAC2   ADP/ATP carrier 2   chr5:43360   | 169 |
| Light-2 | 671 | Background | AT5G13490 | Symbols: AAC2   ADP/ATP carrier 2   chr5:43360   | 169 |
| Light-2 | 671 | Background | AT5G13490 | Symbols: AAC2   ADP/ATP carrier 2   chr5:43360   | 169 |
| Light-2 | 671 | Background | AT5G13490 | Symbols: AAC2   ADP/ATP carrier 2   chr5:43360   | 169 |
| Light-2 | 671 | Background | AT5G13490 | Symbols: AAC2   ADP/ATP carrier 2   chr5:43360   | 169 |
| Light-2 | 672 | Background | AT3G22330 | Symbols: PMH2, ATRH53   putative mitochondri     | 167 |
| Light-2 | 672 | Background | AT3G22330 | Symbols: PMH2, ATRH53   putative mitochondri     | 167 |
| Light-2 | 672 | Background | AT3G22330 | Symbols: PMH2, ATRH53   putative mitochondri     | 167 |
| Light-2 | 672 | Background | AT3G22330 | Symbols: PMH2, ATRH53   putative mitochondri     | 167 |
| Light-2 | 672 | Background | AT3G22330 | Symbols: PMH2, ATRH53   putative mitochondri     | 167 |
| Light-2 | 672 | Background | AT3G22330 | Symbols: PMH2, ATRH53   putative mitochondri     | 167 |
| Light-2 | 672 | Background | AT3G22330 | Symbols: PMH2, ATRH53   putative mitochondri     | 167 |
| Light-2 | 672 | Background | AT3G22330 | Symbols: PMH2, ATRH53   putative mitochondri     | 167 |
| Light-2 | 673 | Background | AT1G43800 | Symbols:   Plant stearyl-acyl-carrier-protein de | 166 |
| Light-2 | 673 | Background | AT1G43800 | Symbols:   Plant stearyl-acyl-carrier-protein de | 166 |
| Light-2 | 673 | Background | AT1G43800 | Symbols:   Plant stearyl-acyl-carrier-protein de | 166 |
| Light-2 | 673 | Background | AT1G43800 | Symbols:   Plant stearyl-acyl-carrier-protein de | 166 |
| Light-2 | 674 | Background | AT5G42020 | Symbols: BIP, BIP2   Heat shock protein 70 (Hsp  | 162 |
| Light-2 | 674 | Background | AT5G42020 | Symbols: BIP, BIP2   Heat shock protein 70 (Hsp  | 162 |
| Light-2 | 674 | Background | AT5G42020 | Symbols: BIP, BIP2   Heat shock protein 70 (Hsp  | 162 |
| Light-2 | 674 | Background | AT5G42020 | Symbols: BIP, BIP2   Heat shock protein 70 (Hsp  | 162 |
| Light-2 | 674 | Background | AT5G42020 | Symbols: BIP, BIP2   Heat shock protein 70 (Hsp  | 162 |
| Light-2 | 674 | Background | AT5G42020 | Symbols: BIP, BIP2   Heat shock protein 70 (Hsp  | 162 |
| Light-2 | 675 | Background | AT3G56130 | Symbols:   biotin/lipoyl attachment domain-cor   | 160 |
| Light-2 | 675 | Background | AT3G56130 | Symbols:   biotin/lipoyl attachment domain-cor   | 160 |
| Light-2 | 675 | Background | AT3G56130 | Symbols:   biotin/lipoyl attachment domain-cor   | 160 |
| Light-2 | 676 | Background | AT5G08670 | Symbols:   ATP synthase alpha/beta family prot   | 158 |
| Light-2 | 676 | Background | AT5G08670 | Symbols:   ATP synthase alpha/beta family prot   | 158 |
| Light-2 | 676 | Background | AT5G08670 | Symbols:   ATP synthase alpha/beta family prot   | 158 |
| Light-2 | 676 | Background | AT5G08670 | Symbols:   ATP synthase alpha/beta family prot   | 158 |
| Light-2 | 677 | Background | AT3G23990 | Symbols: HSP60, HSP60-3B   heat shock protein    | 154 |
| Light-2 | 677 | Background | AT3G23990 | Symbols: HSP60, HSP60-3B   heat shock protein    | 154 |
| Light-2 | 678 | Background | AT3G17390 | Symbols: MTO3, SAMS3, MAT4   S-adenosylmet       | 150 |
| Light-2 | 678 | Background | AT3G17390 | Symbols: MTO3, SAMS3, MAT4   S-adenosylmet       | 150 |
| Light-2 | 678 | Background | AT3G17390 | Symbols: MTO3, SAMS3, MAT4   S-adenosylmet       | 150 |

|         |     |            |           |                                                  |     |
|---------|-----|------------|-----------|--------------------------------------------------|-----|
| Light-2 | 679 | Background | AT5G43010 | Symbols: RPT4A   regulatory particle triple-A AT | 147 |
| Light-2 | 679 | Background | AT5G43010 | Symbols: RPT4A   regulatory particle triple-A AT | 147 |
| Light-2 | 679 | Background | AT5G43010 | Symbols: RPT4A   regulatory particle triple-A AT | 147 |
| Light-2 | 679 | Background | AT5G43010 | Symbols: RPT4A   regulatory particle triple-A AT | 147 |
| Light-2 | 679 | Background | AT5G43010 | Symbols: RPT4A   regulatory particle triple-A AT | 147 |
| Light-2 | 680 | Background | AT1G22780 | Symbols: PFL, RPS18A, PFL1   Ribosomal protein   | 147 |
| Light-2 | 680 | Background | AT1G22780 | Symbols: PFL, RPS18A, PFL1   Ribosomal protein   | 147 |
| Light-2 | 681 | Background | AT5G42950 | Symbols:   GYF domain-containing protein   chr   | 146 |
| Light-2 | 681 | Background | AT5G42950 | Symbols:   GYF domain-containing protein   chr   | 146 |
| Light-2 | 682 | Background | AT5G49910 | Symbols: CPHSC70-2EAT SHOCK PROTEIN 70-2, I      | 145 |
| Light-2 | 682 | Background | AT5G49910 | Symbols: CPHSC70-2EAT SHOCK PROTEIN 70-2, I      | 145 |
| Light-2 | 682 | Background | AT5G49910 | Symbols: CPHSC70-2EAT SHOCK PROTEIN 70-2, I      | 145 |
| Light-2 | 682 | Background | AT5G49910 | Symbols: CPHSC70-2EAT SHOCK PROTEIN 70-2, I      | 145 |
| Light-2 | 682 | Background | AT5G49910 | Symbols: CPHSC70-2EAT SHOCK PROTEIN 70-2, I      | 145 |
| Light-2 | 683 | Background | AT1G09100 | Symbols: RPT5B   26S proteasome AAA-ATPase       | 145 |
| Light-2 | 683 | Background | AT1G09100 | Symbols: RPT5B   26S proteasome AAA-ATPase       | 145 |
| Light-2 | 683 | Background | AT1G09100 | Symbols: RPT5B   26S proteasome AAA-ATPase       | 145 |
| Light-2 | 683 | Background | AT1G09100 | Symbols: RPT5B   26S proteasome AAA-ATPase       | 145 |
| Light-2 | 684 | Background | AT5G56000 | Symbols: Hsp81.4, AtHsp90.4   HEAT SHOCK PR      | 139 |
| Light-2 | 684 | Background | AT5G56000 | Symbols: Hsp81.4, AtHsp90.4   HEAT SHOCK PR      | 139 |
| Light-2 | 684 | Background | AT5G56000 | Symbols: Hsp81.4, AtHsp90.4   HEAT SHOCK PR      | 139 |
| Light-2 | 684 | Background | AT5G56000 | Symbols: Hsp81.4, AtHsp90.4   HEAT SHOCK PR      | 139 |
| Light-2 | 685 | Background | AT2G31610 | Symbols:   Ribosomal protein S3 family protein   | 134 |
| Light-2 | 685 | Background | AT2G31610 | Symbols:   Ribosomal protein S3 family protein   | 134 |
| Light-2 | 686 | Background | AT5G24710 | Symbols:   Transducin/WD40 repeat-like superf    | 133 |
| Light-2 | 686 | Background | AT5G24710 | Symbols:   Transducin/WD40 repeat-like superf    | 133 |
| Light-2 | 687 | Background | AT2G41800 | Symbols:   Protein of unknown function, DUF64    | 130 |
| Light-2 | 687 | Background | AT2G41800 | Symbols:   Protein of unknown function, DUF64    | 130 |
| Light-2 | 687 | Background | AT2G41800 | Symbols:   Protein of unknown function, DUF64    | 130 |
| Light-2 | 688 | Background | AT1G33120 | Symbols:   Ribosomal protein L6 family   chr1:1  | 129 |
| Light-2 | 688 | Background | AT1G33120 | Symbols:   Ribosomal protein L6 family   chr1:1  | 129 |
| Light-2 | 688 | Background | AT1G33120 | Symbols:   Ribosomal protein L6 family   chr1:1  | 129 |
| Light-2 | 688 | Background | AT1G33120 | Symbols:   Ribosomal protein L6 family   chr1:1  | 129 |
| Light-2 | 689 | Background | AT1G36180 | Symbols: ACC2   acetyl-CoA carboxylase 2   chr1  | 127 |
| Light-2 | 689 | Background | AT1G36180 | Symbols: ACC2   acetyl-CoA carboxylase 2   chr1  | 127 |
| Light-2 | 689 | Background | AT1G36180 | Symbols: ACC2   acetyl-CoA carboxylase 2   chr1  | 127 |
| Light-2 | 689 | Background | AT1G36180 | Symbols: ACC2   acetyl-CoA carboxylase 2   chr1  | 127 |
| Light-2 | 690 | Background | AT2G36620 | Symbols: RPL24A   ribosomal protein L24   chr2   | 126 |
| Light-2 | 690 | Background | AT2G36620 | Symbols: RPL24A   ribosomal protein L24   chr2   | 126 |
| Light-2 | 691 | Background | AT3G56150 | Symbols: EIF3C, ATEIF3C-1, EIF3C-1, ATTIF3C1, T  | 125 |
| Light-2 | 691 | Background | AT3G56150 | Symbols: EIF3C, ATEIF3C-1, EIF3C-1, ATTIF3C1, T  | 125 |
| Light-2 | 691 | Background | AT3G56150 | Symbols: EIF3C, ATEIF3C-1, EIF3C-1, ATTIF3C1, T  | 125 |
| Light-2 | 692 | Background | AT5G19990 | Symbols: RPT6A, ATSUG1   regulatory particle tr  | 113 |
| Light-2 | 692 | Background | AT5G19990 | Symbols: RPT6A, ATSUG1   regulatory particle tr  | 113 |
| Light-2 | 692 | Background | AT5G19990 | Symbols: RPT6A, ATSUG1   regulatory particle tr  | 113 |
| Light-2 | 692 | Background | AT5G19990 | Symbols: RPT6A, ATSUG1   regulatory particle tr  | 113 |
| Light-2 | 693 | Background | AT3G52140 | Symbols:   tetratricopeptide repeat (TPR)-conta  | 112 |
| Light-2 | 693 | Background | AT3G52140 | Symbols:   tetratricopeptide repeat (TPR)-conta  | 112 |
| Light-2 | 694 | Background | AT2G24050 | Symbols: eFiso4G2   MIF4G domain-containing      | 112 |
| Light-2 | 694 | Background | AT2G24050 | Symbols: eFiso4G2   MIF4G domain-containing      | 112 |
| Light-2 | 695 | Background | AT3G05560 | Symbols:   Ribosomal L22e protein family   chr:  | 108 |
| Light-2 | 695 | Background | AT3G05560 | Symbols:   Ribosomal L22e protein family   chr:  | 108 |
| Light-2 | 696 | Background | AT2G20800 | Symbols: NDB4   NAD(P)H dehydrogenase B4   c     | 105 |
| Light-2 | 696 | Background | AT2G20800 | Symbols: NDB4   NAD(P)H dehydrogenase B4   c     | 105 |
| Light-2 | 697 | Background | AT1G64520 | Symbols: RPN12a   regulatory particle non-ATPa   | 105 |
| Light-2 | 697 | Background | AT1G64520 | Symbols: RPN12a   regulatory particle non-ATPa   | 105 |
| Light-2 | 698 | Background | AT1G29150 | Symbols: ATS9, RPN6   non-ATPase subunit 9   c   | 104 |
| Light-2 | 698 | Background | AT1G29150 | Symbols: ATS9, RPN6   non-ATPase subunit 9   c   | 104 |

|         |                    |           |                                                  |     |
|---------|--------------------|-----------|--------------------------------------------------|-----|
| Light-2 | 698 Background     | AT1G29150 | Symbols: ATS9, RPN6   non-ATPase subunit 9   c   | 104 |
| Light-2 | 699 Table 1 Filter | AT1G59990 | Symbols:   DEA(D/H)-box RNA helicase family p    | 104 |
| Light-2 | 699 Table 1 Filter | AT1G59990 | Symbols:   DEA(D/H)-box RNA helicase family p    | 104 |
| Light-2 | 700 Background     | AT2G36160 | Symbols:   Ribosomal protein S11 family protein  | 104 |
| Light-2 | 700 Background     | AT2G36160 | Symbols:   Ribosomal protein S11 family protein  | 104 |
| Light-2 | 701 Background     | AT3G05590 | Symbols: RPL18   ribosomal protein L18   chr3:1  | 99  |
| Light-2 | 701 Background     | AT3G05590 | Symbols: RPL18   ribosomal protein L18   chr3:1  | 99  |
| Light-2 | 702 Background     | AT2G20580 | Symbols: RPN1A, ATRPN1A   26S proteasome re      | 94  |
| Light-2 | 702 Background     | AT2G20580 | Symbols: RPN1A, ATRPN1A   26S proteasome re      | 94  |
| Light-2 | 702 Background     | AT2G20580 | Symbols: RPN1A, ATRPN1A   26S proteasome re      | 94  |
| Light-2 | 703 Background     | AT1G55490 | Symbols: CPN60B, LEN1   chaperonin 60 beta   c   | 94  |
| Light-2 | 703 Background     | AT1G55490 | Symbols: CPN60B, LEN1   chaperonin 60 beta   c   | 94  |
| Light-2 | 704 Background     | AT3G08530 | Symbols:   Clathrin, heavy chain   chr3:258717:  | 91  |
| Light-2 | 704 Background     | AT3G08530 | Symbols:   Clathrin, heavy chain   chr3:258717:  | 91  |
| Light-2 | 705 Background     | AT3G43300 | Symbols: ATMIN7, BEN1   HOPM interactor 7   c    | 91  |
| Light-2 | 705 Background     | AT3G43300 | Symbols: ATMIN7, BEN1   HOPM interactor 7   c    | 91  |
| Light-2 | 706 Background     | AT3G04840 | Symbols:   Ribosomal protein S3Ae   chr3:1329    | 90  |
| Light-2 | 706 Background     | AT3G04840 | Symbols:   Ribosomal protein S3Ae   chr3:1329    | 90  |
| Light-2 | 707 Background     | AT2G01250 | Symbols:   Ribosomal protein L30/L7 family pro   | 85  |
| Light-2 | 707 Background     | AT2G01250 | Symbols:   Ribosomal protein L30/L7 family pro   | 85  |
| Light-2 | 707 Background     | AT2G01250 | Symbols:   Ribosomal protein L30/L7 family pro   | 85  |
| Light-2 | 708 Background     | AT3G12050 | Symbols:   Aha1 domain-containing protein   cl   | 85  |
| Light-2 | 708 Background     | AT3G12050 | Symbols:   Aha1 domain-containing protein   cl   | 85  |
| Light-2 | 709 Background     | AT3G14990 | Symbols:   Class I glutamine amidotransferase-I  | 84  |
| Light-2 | 709 Background     | AT3G14990 | Symbols:   Class I glutamine amidotransferase-I  | 84  |
| Light-2 | 710 Background     | AT3G63460 | Symbols:   transducin family protein / WD-40 re  | 84  |
| Light-2 | 710 Background     | AT3G63460 | Symbols:   transducin family protein / WD-40 re  | 84  |
| Light-2 | 710 Background     | AT3G63460 | Symbols:   transducin family protein / WD-40 re  | 84  |
| Light-2 | 711 Background     | AT1G64790 | Symbols: ILA   ILITYHIA   chr1:24065232-240819   | 82  |
| Light-2 | 711 Background     | AT1G64790 | Symbols: ILA   ILITYHIA   chr1:24065232-240819   | 82  |
| Light-2 | 712 Background     | AT5G43780 | Symbols: APS4   Pseudouridine synthase/archae    | 79  |
| Light-2 | 712 Background     | AT5G43780 | Symbols: APS4   Pseudouridine synthase/archae    | 79  |
| Light-2 | 713 Background     | AT5G27770 | Symbols:   Ribosomal L22e protein family   chr!  | 78  |
| Light-2 | 713 Background     | AT5G27770 | Symbols:   Ribosomal L22e protein family   chr!  | 78  |
| Light-2 | 714 Background     | AT5G16390 | Symbols: CAC1, CAC1A, BCCP, BCCP1   chloropl     | 75  |
| Light-2 | 714 Background     | AT5G16390 | Symbols: CAC1, CAC1A, BCCP, BCCP1   chloropl     | 75  |
| Light-2 | 714 Background     | AT5G16390 | Symbols: CAC1, CAC1A, BCCP, BCCP1   chloropl     | 75  |
| Light-2 | 715 Background     | AT3G03110 | Symbols: XPO1B, CRM1B   exportin 1B   chr3:7C    | 65  |
| Light-2 | 715 Background     | AT3G03110 | Symbols: XPO1B, CRM1B   exportin 1B   chr3:7C    | 65  |
| Light-2 | 716 Background     | AT1G69840 | Symbols:   SPFH/Band 7/PHB domain-containin      | 63  |
| Light-2 | 716 Background     | AT1G69840 | Symbols:   SPFH/Band 7/PHB domain-containin      | 63  |
| Light-2 | 717 Background     | AT5G58290 | Symbols: RPT3   regulatory particle triple-A ATP | 60  |
| Light-2 | 717 Background     | AT5G58290 | Symbols: RPT3   regulatory particle triple-A ATP | 60  |
| Light-2 | 718 Background     | AT4G34030 | Symbols: MCCB   3-methylcrotonyl-CoA carboxy     | 55  |
| Light-2 | 718 Background     | AT4G34030 | Symbols: MCCB   3-methylcrotonyl-CoA carboxy     | 55  |
| Light-2 | 719 Background     | AT2G17360 | Symbols:   Ribosomal protein S4 (RPS4A) family   | 50  |
| Light-2 | 719 Background     | AT2G17360 | Symbols:   Ribosomal protein S4 (RPS4A) family   | 50  |

software (version 2.5.0, Matrix Science) combined with the Mascot search engine (version 2.4.1, Matrix Science) using the Mascot

hold (high confidence,  $p < 0.01$ ); **prot\_sequences\_sig**: number of significant protein sequences above threshold (high confidence, logical assignment of peptides to proteins. The first time a peptide match to a query appears in the report, it is shown in bold face are the most likely assignments. Conversely, a protein that does not contain any bold red matches is an intersection of proteins li ) between the experimental and calculated masses; **pep\_start**: peptide start position in protein; **pep\_end**: peptide end position in ver this value, the more significant the result); **pep\_res\_before**: amino acid before peptide sequence; **pep\_seq**: peptide sequence

| prot_mass | prot_matches | prot_sequences | prot_cover | pep_query | pep_rank | pep_isbold | pep_isunique | pep_exp_mz |
|-----------|--------------|----------------|------------|-----------|----------|------------|--------------|------------|
| 51385     | 38           | 22             | 68.9       | 853       | 1        | 1          | 0            | 530.268    |
| 51385     | 38           | 22             | 68.9       | 1153      | 1        | 1          | 0            | 570.3504   |
| 51385     | 38           | 22             | 68.9       | 1178      | 1        | 1          | 0            | 573.7987   |
| 51385     | 38           | 22             | 68.9       | 1519      | 1        | 1          | 0            | 616.2913   |
| 51385     | 38           | 22             | 68.9       | 1759      | 1        | 1          | 0            | 644.3334   |
| 51385     | 38           | 22             | 68.9       | 1787      | 1        | 1          | 1            | 648.8072   |
| 51385     | 38           | 22             | 68.9       | 2119      | 1        | 1          | 0            | 692.8538   |
| 51385     | 38           | 22             | 68.9       | 2326      | 1        | 1          | 1            | 723.3277   |
| 51385     | 38           | 22             | 68.9       | 2329      | 1        | 1          | 0            | 723.8474   |
| 51385     | 38           | 22             | 68.9       | 2752      | 1        | 1          | 0            | 819.9279   |
| 51385     | 38           | 22             | 68.9       | 2835      | 1        | 1          | 0            | 840.4016   |
| 51385     | 38           | 22             | 68.9       | 2869      | 1        | 1          | 0            | 848.9189   |
| 51385     | 38           | 22             | 68.9       | 3055      | 1        | 1          | 1            | 889.9352   |
| 51385     | 38           | 22             | 68.9       | 3130      | 1        | 1          | 0            | 911.9653   |
| 51385     | 38           | 22             | 68.9       | 3247      | 1        | 1          | 1            | 936.9371   |
| 51385     | 38           | 22             | 68.9       | 3427      | 1        | 1          | 0            | 976.4478   |
| 51385     | 38           | 22             | 68.9       | 3461      | 1        | 1          | 0            | 987.0018   |
| 51385     | 38           | 22             | 68.9       | 3705      | 1        | 1          | 0            | 701.0359   |
| 51385     | 38           | 22             | 68.9       | 3743      | 1        | 1          | 0            | 709.3574   |
| 51385     | 38           | 22             | 68.9       | 4802      | 1        | 1          | 0            | 923.1117   |
| 51385     | 38           | 22             | 68.9       | 4907      | 1        | 1          | 1            | 934.7717   |
| 51385     | 38           | 22             | 68.9       | 5581      | 1        | 1          | 0            | 1133.8388  |
| 50361     | 36           | 20             | 63.3       | 580       | 1        | 1          | 1            | 488.7421   |
| 50361     | 36           | 20             | 63.3       | 750       | 1        | 1          | 0            | 514.282    |
| 50361     | 36           | 20             | 63.3       | 1153      | 1        | 0          | 0            | 570.3504   |
| 50361     | 36           | 20             | 63.3       | 1178      | 1        | 0          | 0            | 573.7987   |
| 50361     | 36           | 20             | 63.3       | 1519      | 1        | 0          | 0            | 616.2913   |
| 50361     | 36           | 20             | 63.3       | 1796      | 1        | 1          | 1            | 650.3141   |
| 50361     | 36           | 20             | 63.3       | 2241      | 1        | 1          | 0            | 709.8294   |
| 50361     | 36           | 20             | 63.3       | 2459      | 1        | 1          | 1            | 747.8315   |
| 50361     | 36           | 20             | 63.3       | 2752      | 1        | 0          | 0            | 819.9279   |
| 50361     | 36           | 20             | 63.3       | 2835      | 1        | 0          | 0            | 840.4016   |
| 50361     | 36           | 20             | 63.3       | 2869      | 1        | 0          | 0            | 848.9189   |
| 50361     | 36           | 20             | 63.3       | 3130      | 1        | 0          | 0            | 911.9653   |
| 50361     | 36           | 20             | 63.3       | 3427      | 1        | 0          | 0            | 976.4478   |
| 50361     | 36           | 20             | 63.3       | 3461      | 1        | 0          | 0            | 987.0018   |
| 50361     | 36           | 20             | 63.3       | 3705      | 1        | 0          | 0            | 701.0359   |
| 50361     | 36           | 20             | 63.3       | 3743      | 1        | 0          | 0            | 709.3574   |
| 50361     | 36           | 20             | 63.3       | 4407      | 1        | 1          | 0            | 1184.0669  |
| 50361     | 36           | 20             | 63.3       | 4792      | 1        | 1          | 0            | 922.1119   |
| 50361     | 36           | 20             | 63.3       | 4900      | 1        | 1          | 0            | 933.4519   |
| 50361     | 36           | 20             | 63.3       | 5308      | 1        | 1          | 1            | 1067.4951  |
| 51258     | 36           | 19             | 59.7       | 853       | 1        | 0          | 0            | 530.268    |
| 51258     | 36           | 19             | 59.7       | 1153      | 1        | 0          | 0            | 570.3504   |
| 51258     | 36           | 19             | 59.7       | 1178      | 1        | 0          | 0            | 573.7987   |
| 51258     | 36           | 19             | 59.7       | 1519      | 1        | 0          | 0            | 616.2913   |
| 51258     | 36           | 19             | 59.7       | 1759      | 1        | 0          | 0            | 644.3334   |
| 51258     | 36           | 19             | 59.7       | 2119      | 1        | 0          | 0            | 692.8538   |

|       |    |    |      |      |   |   |   |           |
|-------|----|----|------|------|---|---|---|-----------|
| 51258 | 36 | 19 | 59.7 | 2281 | 1 | 1 | 0 | 716.3193  |
| 51258 | 36 | 19 | 59.7 | 2329 | 1 | 0 | 0 | 723.8474  |
| 51258 | 36 | 19 | 59.7 | 2752 | 1 | 0 | 0 | 819.9279  |
| 51258 | 36 | 19 | 59.7 | 2804 | 1 | 1 | 0 | 833.3938  |
| 51258 | 36 | 19 | 59.7 | 2869 | 1 | 0 | 0 | 848.9189  |
| 51258 | 36 | 19 | 59.7 | 3130 | 1 | 0 | 0 | 911.9653  |
| 51258 | 36 | 19 | 59.7 | 3427 | 1 | 0 | 0 | 976.4478  |
| 51258 | 36 | 19 | 59.7 | 3461 | 1 | 0 | 0 | 987.0018  |
| 51258 | 36 | 19 | 59.7 | 3705 | 1 | 0 | 0 | 701.0359  |
| 51258 | 36 | 19 | 59.7 | 3743 | 1 | 0 | 0 | 709.3574  |
| 51258 | 36 | 19 | 59.7 | 4802 | 1 | 0 | 0 | 923.1117  |
| 51258 | 36 | 19 | 59.7 | 4937 | 1 | 1 | 0 | 938.7838  |
| 51258 | 36 | 19 | 59.7 | 5581 | 1 | 0 | 0 | 1133.8388 |
| 51341 | 35 | 19 | 61.5 | 853  | 1 | 0 | 0 | 530.268   |
| 51341 | 35 | 19 | 61.5 | 1153 | 1 | 0 | 0 | 570.3504  |
| 51341 | 35 | 19 | 61.5 | 1178 | 1 | 0 | 0 | 573.7987  |
| 51341 | 35 | 19 | 61.5 | 1519 | 1 | 0 | 0 | 616.2913  |
| 51341 | 35 | 19 | 61.5 | 1759 | 1 | 0 | 0 | 644.3334  |
| 51341 | 35 | 19 | 61.5 | 1835 | 1 | 1 | 1 | 654.8245  |
| 51341 | 35 | 19 | 61.5 | 2241 | 1 | 0 | 0 | 709.8294  |
| 51341 | 35 | 19 | 61.5 | 2281 | 1 | 0 | 0 | 716.3193  |
| 51341 | 35 | 19 | 61.5 | 2329 | 1 | 0 | 0 | 723.8474  |
| 51341 | 35 | 19 | 61.5 | 2752 | 1 | 0 | 0 | 819.9279  |
| 51341 | 35 | 19 | 61.5 | 2804 | 1 | 0 | 0 | 833.3938  |
| 51341 | 35 | 19 | 61.5 | 2869 | 1 | 0 | 0 | 848.9189  |
| 51341 | 35 | 19 | 61.5 | 3331 | 1 | 1 | 1 | 950.4707  |
| 51341 | 35 | 19 | 61.5 | 3427 | 1 | 0 | 0 | 976.4478  |
| 51341 | 35 | 19 | 61.5 | 3461 | 1 | 0 | 0 | 987.0018  |
| 51341 | 35 | 19 | 61.5 | 3705 | 1 | 0 | 0 | 701.0359  |
| 51341 | 35 | 19 | 61.5 | 4739 | 1 | 1 | 1 | 913.1079  |
| 51341 | 35 | 19 | 61.5 | 4937 | 1 | 0 | 0 | 938.7838  |
| 51341 | 35 | 19 | 61.5 | 5581 | 1 | 0 | 0 | 1133.8388 |
| 71712 | 30 | 21 | 51.6 | 661  | 1 | 1 | 0 | 501.7821  |
| 71712 | 30 | 21 | 51.6 | 1453 | 1 | 1 | 0 | 608.3289  |
| 71712 | 30 | 21 | 51.6 | 1506 | 1 | 1 | 0 | 614.8175  |
| 71712 | 30 | 21 | 51.6 | 1779 | 1 | 1 | 0 | 647.8162  |
| 71712 | 30 | 21 | 51.6 | 1898 | 1 | 1 | 0 | 665.3107  |
| 71712 | 30 | 21 | 51.6 | 1999 | 1 | 1 | 0 | 679.811   |
| 71712 | 30 | 21 | 51.6 | 2127 | 1 | 1 | 0 | 693.8677  |
| 71712 | 30 | 21 | 51.6 | 2269 | 1 | 1 | 1 | 713.8857  |
| 71712 | 30 | 21 | 51.6 | 2300 | 1 | 1 | 0 | 718.8802  |
| 71712 | 30 | 21 | 51.6 | 2399 | 1 | 1 | 0 | 737.3462  |
| 71712 | 30 | 21 | 51.6 | 2575 | 1 | 1 | 0 | 770.8823  |
| 71712 | 30 | 21 | 51.6 | 2629 | 1 | 1 | 1 | 783.9082  |
| 71712 | 30 | 21 | 51.6 | 2798 | 1 | 1 | 0 | 832.4088  |
| 71712 | 30 | 21 | 51.6 | 2815 | 1 | 1 | 0 | 838.368   |
| 71712 | 30 | 21 | 51.6 | 2838 | 1 | 1 | 0 | 840.92    |
| 71712 | 30 | 21 | 51.6 | 4573 | 1 | 1 | 1 | 1280.6295 |
| 71712 | 30 | 21 | 51.6 | 4604 | 1 | 1 | 0 | 863.4107  |
| 71712 | 30 | 21 | 51.6 | 4646 | 1 | 1 | 0 | 1329.6379 |
| 71712 | 30 | 21 | 51.6 | 4795 | 1 | 1 | 1 | 922.3841  |
| 71712 | 30 | 21 | 51.6 | 5153 | 1 | 1 | 1 | 1009.5041 |
| 71712 | 30 | 21 | 51.6 | 5161 | 1 | 1 | 1 | 1017.9042 |
| 47075 | 25 | 18 | 55.1 | 489  | 1 | 1 | 1 | 475.7505  |
| 47075 | 25 | 18 | 55.1 | 518  | 1 | 1 | 0 | 479.7633  |
| 47075 | 25 | 18 | 55.1 | 719  | 1 | 1 | 0 | 509.2767  |
| 47075 | 25 | 18 | 55.1 | 1060 | 1 | 1 | 0 | 557.8452  |
| 47075 | 25 | 18 | 55.1 | 1166 | 1 | 1 | 0 | 571.7902  |

|       |    |    |      |      |   |   |   |           |
|-------|----|----|------|------|---|---|---|-----------|
| 47075 | 25 | 18 | 55.1 | 1294 | 1 | 1 | 0 | 587.3276  |
| 47075 | 25 | 18 | 55.1 | 2184 | 1 | 1 | 0 | 701.3698  |
| 47075 | 25 | 18 | 55.1 | 2333 | 1 | 1 | 1 | 724.3795  |
| 47075 | 25 | 18 | 55.1 | 2487 | 1 | 1 | 0 | 751.943   |
| 47075 | 25 | 18 | 55.1 | 2643 | 1 | 1 | 1 | 788.4276  |
| 47075 | 25 | 18 | 55.1 | 2666 | 1 | 1 | 0 | 794.3545  |
| 47075 | 25 | 18 | 55.1 | 3059 | 1 | 1 | 0 | 595.5913  |
| 47075 | 25 | 18 | 55.1 | 3145 | 1 | 1 | 0 | 914.4724  |
| 47075 | 25 | 18 | 55.1 | 3370 | 1 | 1 | 0 | 961.0045  |
| 47075 | 25 | 18 | 55.1 | 3556 | 1 | 1 | 0 | 676.636   |
| 47075 | 25 | 18 | 55.1 | 3625 | 1 | 1 | 0 | 1030.0478 |
| 47075 | 25 | 18 | 55.1 | 5043 | 1 | 1 | 0 | 965.838   |
| 47075 | 25 | 18 | 55.1 | 5246 | 1 | 1 | 1 | 1046.5422 |
| 50191 | 27 | 16 | 60.2 | 366  | 1 | 1 | 0 | 452.2172  |
| 50191 | 27 | 16 | 60.2 | 603  | 1 | 1 | 0 | 494.2769  |
| 50191 | 27 | 16 | 60.2 | 1745 | 1 | 1 | 0 | 642.2557  |
| 50191 | 27 | 16 | 60.2 | 2403 | 1 | 1 | 0 | 737.4358  |
| 50191 | 27 | 16 | 60.2 | 2681 | 1 | 1 | 0 | 799.887   |
| 50191 | 27 | 16 | 60.2 | 2858 | 1 | 1 | 1 | 845.9465  |
| 50191 | 27 | 16 | 60.2 | 2883 | 1 | 1 | 0 | 851.4559  |
| 50191 | 27 | 16 | 60.2 | 3069 | 1 | 1 | 0 | 896.9681  |
| 50191 | 27 | 16 | 60.2 | 3216 | 1 | 1 | 0 | 929.445   |
| 50191 | 27 | 16 | 60.2 | 3286 | 1 | 1 | 0 | 943.4761  |
| 50191 | 27 | 16 | 60.2 | 3468 | 1 | 1 | 0 | 989.4454  |
| 50191 | 27 | 16 | 60.2 | 4374 | 1 | 1 | 0 | 782.6751  |
| 50191 | 27 | 16 | 60.2 | 4442 | 1 | 1 | 0 | 795.7358  |
| 50191 | 27 | 16 | 60.2 | 4462 | 1 | 1 | 0 | 1198.0994 |
| 50191 | 27 | 16 | 60.2 | 4634 | 1 | 1 | 0 | 881.0804  |
| 50191 | 27 | 16 | 60.2 | 5300 | 1 | 1 | 0 | 1065.2149 |
| 50194 | 26 | 16 | 60.2 | 366  | 1 | 0 | 0 | 452.2172  |
| 50194 | 26 | 16 | 60.2 | 603  | 1 | 0 | 0 | 494.2769  |
| 50194 | 26 | 16 | 60.2 | 1745 | 1 | 0 | 0 | 642.2557  |
| 50194 | 26 | 16 | 60.2 | 2403 | 1 | 0 | 0 | 737.4358  |
| 50194 | 26 | 16 | 60.2 | 2681 | 1 | 0 | 0 | 799.887   |
| 50194 | 26 | 16 | 60.2 | 2799 | 1 | 1 | 1 | 832.4387  |
| 50194 | 26 | 16 | 60.2 | 2883 | 1 | 0 | 0 | 851.4559  |
| 50194 | 26 | 16 | 60.2 | 3069 | 1 | 0 | 0 | 896.9681  |
| 50194 | 26 | 16 | 60.2 | 3216 | 1 | 0 | 0 | 929.445   |
| 50194 | 26 | 16 | 60.2 | 3286 | 1 | 0 | 0 | 943.4761  |
| 50194 | 26 | 16 | 60.2 | 3468 | 1 | 0 | 0 | 989.4454  |
| 50194 | 26 | 16 | 60.2 | 4374 | 1 | 0 | 0 | 782.6751  |
| 50194 | 26 | 16 | 60.2 | 4442 | 1 | 0 | 0 | 795.7358  |
| 50194 | 26 | 16 | 60.2 | 4462 | 1 | 0 | 0 | 1198.0994 |
| 50194 | 26 | 16 | 60.2 | 4634 | 1 | 0 | 0 | 881.0804  |
| 50194 | 26 | 16 | 60.2 | 5300 | 1 | 0 | 0 | 1065.2149 |
| 46960 | 24 | 18 | 54.1 | 445  | 1 | 1 | 0 | 468.2633  |
| 46960 | 24 | 18 | 54.1 | 518  | 1 | 0 | 0 | 479.7633  |
| 46960 | 24 | 18 | 54.1 | 582  | 1 | 1 | 1 | 488.7823  |
| 46960 | 24 | 18 | 54.1 | 719  | 1 | 0 | 0 | 509.2767  |
| 46960 | 24 | 18 | 54.1 | 1027 | 1 | 1 | 1 | 552.8295  |
| 46960 | 24 | 18 | 54.1 | 1060 | 1 | 0 | 0 | 557.8452  |
| 46960 | 24 | 18 | 54.1 | 1166 | 1 | 0 | 0 | 571.7902  |
| 46960 | 24 | 18 | 54.1 | 1294 | 1 | 0 | 0 | 587.3276  |
| 46960 | 24 | 18 | 54.1 | 2184 | 1 | 0 | 0 | 701.3698  |
| 46960 | 24 | 18 | 54.1 | 2487 | 1 | 0 | 0 | 751.943   |
| 46960 | 24 | 18 | 54.1 | 2666 | 1 | 0 | 0 | 794.3545  |
| 46960 | 24 | 18 | 54.1 | 3059 | 1 | 0 | 0 | 595.5913  |
| 46960 | 24 | 18 | 54.1 | 3145 | 1 | 0 | 0 | 914.4724  |

|       |    |    |      |      |   |   |   |           |
|-------|----|----|------|------|---|---|---|-----------|
| 46960 | 24 | 18 | 54.1 | 3370 | 1 | 0 | 0 | 961.0045  |
| 46960 | 24 | 18 | 54.1 | 3556 | 1 | 0 | 0 | 676.636   |
| 46960 | 24 | 18 | 54.1 | 3625 | 1 | 0 | 0 | 1030.0478 |
| 46960 | 24 | 18 | 54.1 | 5043 | 1 | 0 | 0 | 965.838   |
| 71559 | 24 | 20 | 43.9 | 661  | 1 | 0 | 0 | 501.7821  |
| 71559 | 24 | 20 | 43.9 | 1453 | 1 | 0 | 0 | 608.3289  |
| 71559 | 24 | 20 | 43.9 | 1495 | 1 | 1 | 1 | 613.7989  |
| 71559 | 24 | 20 | 43.9 | 1506 | 1 | 0 | 0 | 614.8175  |
| 71559 | 24 | 20 | 43.9 | 1779 | 1 | 0 | 0 | 647.8162  |
| 71559 | 24 | 20 | 43.9 | 1784 | 1 | 1 | 1 | 648.3352  |
| 71559 | 24 | 20 | 43.9 | 1840 | 1 | 1 | 1 | 654.8559  |
| 71559 | 24 | 20 | 43.9 | 1999 | 1 | 0 | 0 | 679.811   |
| 71559 | 24 | 20 | 43.9 | 2127 | 1 | 0 | 0 | 693.8677  |
| 71559 | 24 | 20 | 43.9 | 2210 | 1 | 1 | 1 | 704.3851  |
| 71559 | 24 | 20 | 43.9 | 2282 | 1 | 1 | 1 | 716.3751  |
| 71559 | 24 | 20 | 43.9 | 2399 | 1 | 0 | 0 | 737.3462  |
| 71559 | 24 | 20 | 43.9 | 2529 | 1 | 1 | 1 | 508.272   |
| 71559 | 24 | 20 | 43.9 | 2815 | 1 | 0 | 0 | 838.368   |
| 71559 | 24 | 20 | 43.9 | 2819 | 1 | 1 | 1 | 839.4158  |
| 71559 | 24 | 20 | 43.9 | 2838 | 1 | 0 | 0 | 840.92    |
| 71559 | 24 | 20 | 43.9 | 4580 | 1 | 1 | 0 | 1287.6362 |
| 71559 | 24 | 20 | 43.9 | 4604 | 1 | 0 | 0 | 863.4107  |
| 71559 | 24 | 20 | 43.9 | 4646 | 1 | 0 | 0 | 1329.6379 |
| 71559 | 24 | 20 | 43.9 | 5115 | 1 | 1 | 1 | 1488.7455 |
| 58863 | 27 | 20 | 56.2 | 343  | 1 | 1 | 1 | 446.7606  |
| 58863 | 27 | 20 | 56.2 | 441  | 1 | 1 | 1 | 467.2376  |
| 58863 | 27 | 20 | 56.2 | 510  | 1 | 1 | 1 | 478.2898  |
| 58863 | 27 | 20 | 56.2 | 986  | 1 | 1 | 1 | 546.3025  |
| 58863 | 27 | 20 | 56.2 | 1244 | 1 | 1 | 1 | 581.2937  |
| 58863 | 27 | 20 | 56.2 | 1253 | 1 | 1 | 1 | 582.3243  |
| 58863 | 27 | 20 | 56.2 | 1392 | 1 | 1 | 1 | 600.324   |
| 58863 | 27 | 20 | 56.2 | 1912 | 1 | 1 | 1 | 667.3627  |
| 58863 | 27 | 20 | 56.2 | 2104 | 1 | 1 | 1 | 691.7974  |
| 58863 | 27 | 20 | 56.2 | 2154 | 1 | 1 | 1 | 697.3771  |
| 58863 | 27 | 20 | 56.2 | 2698 | 1 | 1 | 1 | 805.4427  |
| 58863 | 27 | 20 | 56.2 | 2779 | 1 | 1 | 1 | 826.4125  |
| 58863 | 27 | 20 | 56.2 | 2884 | 1 | 1 | 1 | 851.8722  |
| 58863 | 27 | 20 | 56.2 | 2926 | 1 | 1 | 1 | 860.941   |
| 58863 | 27 | 20 | 56.2 | 3458 | 1 | 1 | 1 | 986.0302  |
| 58863 | 27 | 20 | 56.2 | 3920 | 1 | 1 | 1 | 1099.057  |
| 58863 | 27 | 20 | 56.2 | 4635 | 1 | 1 | 1 | 881.1227  |
| 58863 | 27 | 20 | 56.2 | 4696 | 1 | 1 | 1 | 902.4041  |
| 58863 | 27 | 20 | 56.2 | 4847 | 1 | 1 | 1 | 928.4688  |
| 58863 | 27 | 20 | 56.2 | 5272 | 1 | 1 | 1 | 1053.2119 |
| 51237 | 23 | 15 | 49.9 | 669  | 1 | 1 | 1 | 502.7449  |
| 51237 | 23 | 15 | 49.9 | 853  | 1 | 0 | 0 | 530.268   |
| 51237 | 23 | 15 | 49.9 | 1153 | 1 | 0 | 0 | 570.3504  |
| 51237 | 23 | 15 | 49.9 | 1178 | 1 | 0 | 0 | 573.7987  |
| 51237 | 23 | 15 | 49.9 | 1519 | 1 | 0 | 0 | 616.2913  |
| 51237 | 23 | 15 | 49.9 | 1773 | 1 | 1 | 1 | 647.3247  |
| 51237 | 23 | 15 | 49.9 | 2119 | 1 | 0 | 0 | 692.8538  |
| 51237 | 23 | 15 | 49.9 | 2281 | 1 | 0 | 0 | 716.3193  |
| 51237 | 23 | 15 | 49.9 | 2329 | 1 | 0 | 0 | 723.8474  |
| 51237 | 23 | 15 | 49.9 | 2752 | 1 | 0 | 0 | 819.9279  |
| 51237 | 23 | 15 | 49.9 | 2869 | 1 | 0 | 0 | 848.9189  |
| 51237 | 23 | 15 | 49.9 | 3431 | 1 | 1 | 0 | 653.0057  |
| 51237 | 23 | 15 | 49.9 | 4802 | 1 | 0 | 0 | 923.1117  |
| 51237 | 23 | 15 | 49.9 | 4958 | 1 | 1 | 1 | 943.4609  |

|       |    |    |      |      |   |   |   |           |
|-------|----|----|------|------|---|---|---|-----------|
| 51237 | 23 | 15 | 49.9 | 5581 | 1 | 0 | 0 | 1133.8388 |
| 71741 | 18 | 14 | 32.3 | 661  | 1 | 0 | 0 | 501.7821  |
| 71741 | 18 | 14 | 32.3 | 1048 | 1 | 1 | 1 | 556.2539  |
| 71741 | 18 | 14 | 32.3 | 1385 | 1 | 1 | 1 | 599.351   |
| 71741 | 18 | 14 | 32.3 | 1506 | 1 | 0 | 0 | 614.8175  |
| 71741 | 18 | 14 | 32.3 | 1779 | 1 | 0 | 0 | 647.8162  |
| 71741 | 18 | 14 | 32.3 | 1999 | 1 | 0 | 0 | 679.811   |
| 71741 | 18 | 14 | 32.3 | 2300 | 1 | 0 | 0 | 718.8802  |
| 71741 | 18 | 14 | 32.3 | 2399 | 1 | 0 | 0 | 737.3462  |
| 71741 | 18 | 14 | 32.3 | 2798 | 1 | 0 | 0 | 832.4088  |
| 71741 | 18 | 14 | 32.3 | 2815 | 1 | 0 | 0 | 838.368   |
| 71741 | 18 | 14 | 32.3 | 2838 | 1 | 0 | 0 | 840.92    |
| 71741 | 18 | 14 | 32.3 | 4580 | 1 | 0 | 0 | 1287.6362 |
| 71741 | 18 | 14 | 32.3 | 4604 | 1 | 0 | 0 | 863.4107  |
| 71741 | 18 | 14 | 32.3 | 5260 | 1 | 1 | 1 | 1050.8348 |
| 47083 | 17 | 13 | 35.3 | 80   | 1 | 1 | 1 | 381.7288  |
| 47083 | 17 | 13 | 35.3 | 445  | 1 | 0 | 0 | 468.2633  |
| 47083 | 17 | 13 | 35.3 | 518  | 1 | 0 | 0 | 479.7633  |
| 47083 | 17 | 13 | 35.3 | 719  | 1 | 0 | 0 | 509.2767  |
| 47083 | 17 | 13 | 35.3 | 1060 | 1 | 0 | 0 | 557.8452  |
| 47083 | 17 | 13 | 35.3 | 1294 | 1 | 0 | 0 | 587.3276  |
| 47083 | 17 | 13 | 35.3 | 2184 | 1 | 0 | 0 | 701.3698  |
| 47083 | 17 | 13 | 35.3 | 2666 | 1 | 0 | 0 | 794.3545  |
| 47083 | 17 | 13 | 35.3 | 3059 | 1 | 0 | 0 | 595.5913  |
| 47083 | 17 | 13 | 35.3 | 3145 | 1 | 0 | 0 | 914.4724  |
| 47083 | 17 | 13 | 35.3 | 3370 | 1 | 0 | 0 | 961.0045  |
| 47083 | 17 | 13 | 35.3 | 3556 | 1 | 0 | 0 | 676.636   |
| 47083 | 17 | 13 | 35.3 | 5043 | 1 | 0 | 0 | 965.838   |
| 50250 | 18 | 15 | 55.8 | 366  | 1 | 0 | 0 | 452.2172  |
| 50250 | 18 | 15 | 55.8 | 603  | 1 | 0 | 0 | 494.2769  |
| 50250 | 18 | 15 | 55.8 | 1745 | 1 | 0 | 0 | 642.2557  |
| 50250 | 18 | 15 | 55.8 | 2550 | 1 | 1 | 1 | 766.4565  |
| 50250 | 18 | 15 | 55.8 | 2659 | 1 | 1 | 1 | 792.879   |
| 50250 | 18 | 15 | 55.8 | 2860 | 1 | 1 | 1 | 846.4379  |
| 50250 | 18 | 15 | 55.8 | 2883 | 1 | 0 | 0 | 851.4559  |
| 50250 | 18 | 15 | 55.8 | 2981 | 1 | 1 | 1 | 584.3112  |
| 50250 | 18 | 15 | 55.8 | 3280 | 1 | 1 | 0 | 942.9509  |
| 50250 | 18 | 15 | 55.8 | 3286 | 1 | 0 | 0 | 943.4761  |
| 50250 | 18 | 15 | 55.8 | 4374 | 1 | 0 | 0 | 782.6751  |
| 50250 | 18 | 15 | 55.8 | 4442 | 1 | 0 | 0 | 795.7358  |
| 50250 | 18 | 15 | 55.8 | 4479 | 1 | 0 | 0 | 1205.1077 |
| 50250 | 18 | 15 | 55.8 | 4684 | 1 | 1 | 1 | 899.0957  |
| 50250 | 18 | 15 | 55.8 | 5300 | 1 | 0 | 0 | 1065.2149 |
| 73315 | 14 | 12 | 25.8 | 1582 | 1 | 1 | 1 | 624.8452  |
| 73315 | 14 | 12 | 25.8 | 1583 | 1 | 1 | 1 | 625.286   |
| 73315 | 14 | 12 | 25.8 | 1603 | 1 | 1 | 0 | 628.813   |
| 73315 | 14 | 12 | 25.8 | 1776 | 1 | 1 | 1 | 647.794   |
| 73315 | 14 | 12 | 25.8 | 1891 | 1 | 1 | 1 | 664.3221  |
| 73315 | 14 | 12 | 25.8 | 2019 | 1 | 1 | 1 | 681.3745  |
| 73315 | 14 | 12 | 25.8 | 2288 | 1 | 1 | 0 | 717.3689  |
| 73315 | 14 | 12 | 25.8 | 2418 | 1 | 1 | 1 | 739.3852  |
| 73315 | 14 | 12 | 25.8 | 3111 | 1 | 1 | 1 | 907.4811  |
| 73315 | 14 | 12 | 25.8 | 3129 | 1 | 1 | 1 | 911.9539  |
| 73315 | 14 | 12 | 25.8 | 3178 | 1 | 1 | 1 | 920.4485  |
| 73315 | 14 | 12 | 25.8 | 5187 | 1 | 1 | 1 | 1026.828  |
| 37004 | 12 | 10 | 42.9 | 102  | 1 | 1 | 1 | 387.7213  |
| 37004 | 12 | 10 | 42.9 | 1074 | 1 | 1 | 1 | 560.2644  |
| 37004 | 12 | 10 | 42.9 | 1159 | 1 | 1 | 1 | 570.8256  |

|        |    |    |      |      |   |   |   |           |
|--------|----|----|------|------|---|---|---|-----------|
| 37004  | 12 | 10 | 42.9 | 2291 | 1 | 1 | 1 | 717.8822  |
| 37004  | 12 | 10 | 42.9 | 2470 | 1 | 1 | 1 | 749.9274  |
| 37004  | 12 | 10 | 42.9 | 2818 | 1 | 1 | 1 | 559.6625  |
| 37004  | 12 | 10 | 42.9 | 2997 | 1 | 1 | 1 | 881.3965  |
| 37004  | 12 | 10 | 42.9 | 3570 | 1 | 1 | 1 | 678.3622  |
| 37004  | 12 | 10 | 42.9 | 3864 | 1 | 1 | 1 | 1086.5077 |
| 37004  | 12 | 10 | 42.9 | 4068 | 1 | 1 | 1 | 1125.5383 |
| 136636 | 14 | 12 | 12.4 | 245  | 1 | 1 | 1 | 424.753   |
| 136636 | 14 | 12 | 12.4 | 566  | 1 | 1 | 1 | 486.7714  |
| 136636 | 14 | 12 | 12.4 | 611  | 1 | 1 | 1 | 494.7845  |
| 136636 | 14 | 12 | 12.4 | 1202 | 1 | 1 | 1 | 576.8037  |
| 136636 | 14 | 12 | 12.4 | 1674 | 1 | 1 | 1 | 635.3619  |
| 136636 | 14 | 12 | 12.4 | 1696 | 1 | 1 | 1 | 638.8286  |
| 136636 | 14 | 12 | 12.4 | 2205 | 1 | 1 | 1 | 469.6082  |
| 136636 | 14 | 12 | 12.4 | 2393 | 1 | 1 | 1 | 734.8947  |
| 136636 | 14 | 12 | 12.4 | 2472 | 1 | 1 | 1 | 750.3819  |
| 136636 | 14 | 12 | 12.4 | 2631 | 1 | 1 | 1 | 784.9199  |
| 136636 | 14 | 12 | 12.4 | 3447 | 1 | 1 | 1 | 983.0143  |
| 136636 | 14 | 12 | 12.4 | 4038 | 1 | 1 | 1 | 1121.1202 |
| 41112  | 11 | 9  | 31   | 129  | 1 | 1 | 1 | 397.2262  |
| 41112  | 11 | 9  | 31   | 177  | 1 | 1 | 0 | 408.7504  |
| 41112  | 11 | 9  | 31   | 1301 | 1 | 1 | 0 | 587.8106  |
| 41112  | 11 | 9  | 31   | 2423 | 1 | 1 | 0 | 740.3933  |
| 41112  | 11 | 9  | 31   | 2509 | 1 | 1 | 1 | 758.3613  |
| 41112  | 11 | 9  | 31   | 2843 | 1 | 1 | 1 | 841.9199  |
| 41112  | 11 | 9  | 31   | 3150 | 1 | 1 | 1 | 915.5041  |
| 41112  | 11 | 9  | 31   | 3195 | 1 | 1 | 1 | 923.9311  |
| 41112  | 11 | 9  | 31   | 3837 | 1 | 1 | 0 | 720.0324  |
| 41937  | 12 | 11 | 43.2 | 144  | 1 | 1 | 0 | 400.7712  |
| 41937  | 12 | 11 | 43.2 | 579  | 1 | 1 | 0 | 488.7275  |
| 41937  | 12 | 11 | 43.2 | 1251 | 1 | 1 | 0 | 582.3021  |
| 41937  | 12 | 11 | 43.2 | 1360 | 1 | 1 | 0 | 596.7681  |
| 41937  | 12 | 11 | 43.2 | 1387 | 1 | 1 | 0 | 599.8561  |
| 41937  | 12 | 11 | 43.2 | 2405 | 1 | 1 | 1 | 738.3409  |
| 41937  | 12 | 11 | 43.2 | 3050 | 1 | 1 | 0 | 887.9513  |
| 41937  | 12 | 11 | 43.2 | 3212 | 1 | 1 | 1 | 928.4695  |
| 41937  | 12 | 11 | 43.2 | 3926 | 1 | 1 | 1 | 1100.0402 |
| 41937  | 12 | 11 | 43.2 | 5262 | 1 | 1 | 0 | 1051.2183 |
| 51883  | 13 | 9  | 27.3 | 999  | 1 | 1 | 1 | 548.3262  |
| 51883  | 13 | 9  | 27.3 | 1226 | 1 | 1 | 1 | 579.3293  |
| 51883  | 13 | 9  | 27.3 | 2137 | 1 | 1 | 1 | 695.3387  |
| 51883  | 13 | 9  | 27.3 | 2295 | 1 | 1 | 1 | 718.3387  |
| 51883  | 13 | 9  | 27.3 | 2842 | 1 | 1 | 1 | 841.4774  |
| 51883  | 13 | 9  | 27.3 | 3039 | 1 | 1 | 0 | 590.2672  |
| 51883  | 13 | 9  | 27.3 | 3146 | 1 | 1 | 1 | 914.986   |
| 51883  | 13 | 9  | 27.3 | 3344 | 1 | 1 | 1 | 954.029   |
| 51883  | 13 | 9  | 27.3 | 3768 | 1 | 1 | 1 | 1068.0728 |
| 105902 | 16 | 15 | 19.7 | 139  | 1 | 1 | 1 | 399.7637  |
| 105902 | 16 | 15 | 19.7 | 567  | 1 | 1 | 1 | 486.7763  |
| 105902 | 16 | 15 | 19.7 | 753  | 1 | 1 | 0 | 515.2877  |
| 105902 | 16 | 15 | 19.7 | 781  | 1 | 1 | 0 | 519.7675  |
| 105902 | 16 | 15 | 19.7 | 828  | 1 | 1 | 1 | 525.77    |
| 105902 | 16 | 15 | 19.7 | 1067 | 1 | 1 | 0 | 558.7985  |
| 105902 | 16 | 15 | 19.7 | 1230 | 1 | 1 | 0 | 579.8212  |
| 105902 | 16 | 15 | 19.7 | 1233 | 1 | 1 | 0 | 580.3006  |
| 105902 | 16 | 15 | 19.7 | 2167 | 1 | 1 | 0 | 699.3721  |
| 105902 | 16 | 15 | 19.7 | 2222 | 1 | 1 | 1 | 706.3294  |
| 105902 | 16 | 15 | 19.7 | 2416 | 1 | 1 | 0 | 738.8953  |

|        |    |    |      |      |   |   |   |           |
|--------|----|----|------|------|---|---|---|-----------|
| 105902 | 16 | 15 | 19.7 | 2502 | 1 | 1 | 0 | 756.8659  |
| 105902 | 16 | 15 | 19.7 | 3308 | 1 | 1 | 1 | 946.5273  |
| 105902 | 16 | 15 | 19.7 | 4072 | 1 | 1 | 1 | 751.3725  |
| 105902 | 16 | 15 | 19.7 | 4546 | 1 | 1 | 0 | 836.7989  |
| 10285  | 10 | 5  | 54.6 | 412  | 1 | 1 | 1 | 460.7462  |
| 10285  | 10 | 5  | 54.6 | 464  | 1 | 1 | 1 | 471.2583  |
| 10285  | 10 | 5  | 54.6 | 2310 | 1 | 1 | 1 | 720.3467  |
| 10285  | 10 | 5  | 54.6 | 2510 | 1 | 1 | 1 | 758.3674  |
| 10285  | 10 | 5  | 54.6 | 3783 | 1 | 1 | 1 | 1071.5077 |
| 49813  | 16 | 11 | 35.2 | 396  | 1 | 1 | 1 | 457.787   |
| 49813  | 16 | 11 | 35.2 | 685  | 1 | 1 | 1 | 336.5221  |
| 49813  | 16 | 11 | 35.2 | 739  | 1 | 1 | 1 | 513.3082  |
| 49813  | 16 | 11 | 35.2 | 741  | 1 | 1 | 1 | 513.748   |
| 49813  | 16 | 11 | 35.2 | 1079 | 1 | 1 | 1 | 560.8029  |
| 49813  | 16 | 11 | 35.2 | 1793 | 1 | 1 | 1 | 649.877   |
| 49813  | 16 | 11 | 35.2 | 2346 | 1 | 1 | 1 | 726.3397  |
| 49813  | 16 | 11 | 35.2 | 2744 | 1 | 1 | 1 | 545.6383  |
| 49813  | 16 | 11 | 35.2 | 4326 | 1 | 1 | 1 | 771.3808  |
| 49813  | 16 | 11 | 35.2 | 4565 | 1 | 1 | 1 | 847.1118  |
| 49813  | 16 | 11 | 35.2 | 5108 | 1 | 1 | 1 | 991.812   |
| 36185  | 12 | 8  | 31.4 | 468  | 1 | 1 | 1 | 472.2582  |
| 36185  | 12 | 8  | 31.4 | 898  | 1 | 1 | 1 | 535.8267  |
| 36185  | 12 | 8  | 31.4 | 1816 | 1 | 1 | 1 | 652.3788  |
| 36185  | 12 | 8  | 31.4 | 1842 | 1 | 1 | 1 | 655.8136  |
| 36185  | 12 | 8  | 31.4 | 2095 | 1 | 1 | 1 | 690.8264  |
| 36185  | 12 | 8  | 31.4 | 2507 | 1 | 1 | 1 | 505.284   |
| 36185  | 12 | 8  | 31.4 | 2984 | 1 | 1 | 1 | 877.4324  |
| 36185  | 12 | 8  | 31.4 | 4342 | 1 | 1 | 1 | 774.4093  |
| 29784  | 8  | 5  | 37.2 | 1558 | 1 | 1 | 1 | 621.8285  |
| 29784  | 8  | 5  | 37.2 | 3392 | 1 | 1 | 1 | 968.0192  |
| 29784  | 8  | 5  | 37.2 | 4495 | 1 | 1 | 1 | 1216.122  |
| 29784  | 8  | 5  | 37.2 | 4531 | 1 | 1 | 1 | 1242.6153 |
| 29784  | 8  | 5  | 37.2 | 5083 | 1 | 1 | 1 | 982.8304  |
| 65547  | 13 | 12 | 28.2 | 524  | 1 | 1 | 1 | 481.2133  |
| 65547  | 13 | 12 | 28.2 | 1116 | 1 | 1 | 1 | 566.2389  |
| 65547  | 13 | 12 | 28.2 | 1232 | 1 | 1 | 0 | 580.2545  |
| 65547  | 13 | 12 | 28.2 | 1347 | 1 | 1 | 0 | 594.3549  |
| 65547  | 13 | 12 | 28.2 | 1446 | 1 | 1 | 1 | 607.775   |
| 65547  | 13 | 12 | 28.2 | 1628 | 1 | 1 | 1 | 631.3428  |
| 65547  | 13 | 12 | 28.2 | 2475 | 1 | 1 | 1 | 750.8462  |
| 65547  | 13 | 12 | 28.2 | 2589 | 1 | 1 | 1 | 773.8957  |
| 65547  | 13 | 12 | 28.2 | 2682 | 1 | 1 | 1 | 533.6144  |
| 65547  | 13 | 12 | 28.2 | 3119 | 1 | 1 | 1 | 908.4595  |
| 65547  | 13 | 12 | 28.2 | 4480 | 1 | 1 | 0 | 1205.5711 |
| 65547  | 13 | 12 | 28.2 | 4601 | 1 | 1 | 1 | 862.1195  |
| 40949  | 8  | 7  | 25.4 | 177  | 1 | 0 | 0 | 408.7504  |
| 40949  | 8  | 7  | 25.4 | 1301 | 1 | 0 | 0 | 587.8106  |
| 40949  | 8  | 7  | 25.4 | 2423 | 1 | 0 | 0 | 740.3933  |
| 40949  | 8  | 7  | 25.4 | 2509 | 1 | 0 | 1 | 758.3613  |
| 40949  | 8  | 7  | 25.4 | 2934 | 1 | 1 | 1 | 863.8911  |
| 40949  | 8  | 7  | 25.4 | 3087 | 1 | 1 | 1 | 900.9719  |
| 40949  | 8  | 7  | 25.4 | 3837 | 1 | 0 | 0 | 720.0324  |
| 41563  | 9  | 6  | 18.9 | 96   | 1 | 1 | 0 | 386.2272  |
| 41563  | 9  | 6  | 18.9 | 406  | 1 | 1 | 0 | 459.2945  |
| 41563  | 9  | 6  | 18.9 | 1426 | 1 | 1 | 1 | 604.3196  |
| 41563  | 9  | 6  | 18.9 | 2014 | 1 | 1 | 1 | 680.8599  |
| 41563  | 9  | 6  | 18.9 | 2331 | 1 | 1 | 0 | 723.8744  |
| 41563  | 9  | 6  | 18.9 | 3600 | 1 | 1 | 1 | 1024.5117 |

|        |    |    |      |      |   |   |   |           |
|--------|----|----|------|------|---|---|---|-----------|
| 166282 | 11 | 11 | 10.2 | 453  | 1 | 1 | 1 | 469.7503  |
| 166282 | 11 | 11 | 10.2 | 1150 | 1 | 1 | 0 | 570.2931  |
| 166282 | 11 | 11 | 10.2 | 1297 | 1 | 1 | 1 | 587.3398  |
| 166282 | 11 | 11 | 10.2 | 1304 | 1 | 1 | 1 | 588.33    |
| 166282 | 11 | 11 | 10.2 | 1855 | 1 | 1 | 1 | 658.3528  |
| 166282 | 11 | 11 | 10.2 | 1983 | 1 | 1 | 1 | 677.8331  |
| 166282 | 11 | 11 | 10.2 | 3252 | 1 | 1 | 1 | 937.4266  |
| 166282 | 11 | 11 | 10.2 | 3430 | 1 | 1 | 1 | 652.9962  |
| 166282 | 11 | 11 | 10.2 | 3486 | 1 | 1 | 1 | 993.9756  |
| 166282 | 11 | 11 | 10.2 | 3851 | 1 | 1 | 1 | 723.3322  |
| 166282 | 11 | 11 | 10.2 | 4429 | 1 | 1 | 0 | 793.4133  |
| 73174  | 10 | 10 | 17.2 | 268  | 1 | 1 | 1 | 429.2637  |
| 73174  | 10 | 10 | 17.2 | 481  | 1 | 1 | 1 | 474.256   |
| 73174  | 10 | 10 | 17.2 | 1114 | 1 | 1 | 1 | 565.788   |
| 73174  | 10 | 10 | 17.2 | 1355 | 1 | 1 | 1 | 595.8429  |
| 73174  | 10 | 10 | 17.2 | 1532 | 1 | 1 | 1 | 618.2912  |
| 73174  | 10 | 10 | 17.2 | 1603 | 1 | 0 | 0 | 628.813   |
| 73174  | 10 | 10 | 17.2 | 2239 | 1 | 1 | 1 | 709.3668  |
| 73174  | 10 | 10 | 17.2 | 2288 | 1 | 0 | 0 | 717.3689  |
| 73174  | 10 | 10 | 17.2 | 2703 | 1 | 1 | 1 | 538.63    |
| 73174  | 10 | 10 | 17.2 | 3128 | 1 | 1 | 1 | 911.4579  |
| 40001  | 8  | 8  | 31.3 | 1368 | 1 | 1 | 0 | 597.3351  |
| 40001  | 8  | 8  | 31.3 | 1458 | 1 | 1 | 0 | 609.3064  |
| 40001  | 8  | 8  | 31.3 | 1738 | 1 | 1 | 1 | 640.8188  |
| 40001  | 8  | 8  | 31.3 | 2256 | 1 | 1 | 0 | 712.3353  |
| 40001  | 8  | 8  | 31.3 | 2430 | 1 | 1 | 1 | 742.4107  |
| 40001  | 8  | 8  | 31.3 | 2663 | 1 | 1 | 1 | 793.941   |
| 40001  | 8  | 8  | 31.3 | 4180 | 1 | 1 | 1 | 1138.5902 |
| 40001  | 8  | 8  | 31.3 | 4532 | 1 | 1 | 0 | 829.4093  |
| 47236  | 7  | 6  | 18.4 | 1231 | 1 | 1 | 0 | 579.829   |
| 47236  | 7  | 6  | 18.4 | 1264 | 1 | 1 | 0 | 584.2725  |
| 47236  | 7  | 6  | 18.4 | 1377 | 1 | 1 | 0 | 598.283   |
| 47236  | 7  | 6  | 18.4 | 1783 | 1 | 1 | 0 | 648.3247  |
| 47236  | 7  | 6  | 18.4 | 3287 | 1 | 1 | 0 | 943.9538  |
| 47236  | 7  | 6  | 18.4 | 3481 | 1 | 1 | 1 | 992.4687  |
| 52347  | 4  | 4  | 17.3 | 2870 | 1 | 1 | 1 | 849.3856  |
| 52347  | 4  | 4  | 17.3 | 3804 | 1 | 1 | 1 | 1075.5688 |
| 52347  | 4  | 4  | 17.3 | 4376 | 1 | 1 | 1 | 783.0671  |
| 52347  | 4  | 4  | 17.3 | 4951 | 1 | 1 | 1 | 941.8224  |
| 77064  | 8  | 8  | 13.5 | 299  | 1 | 1 | 0 | 435.7737  |
| 77064  | 8  | 8  | 13.5 | 397  | 1 | 1 | 0 | 458.2482  |
| 77064  | 8  | 8  | 13.5 | 696  | 1 | 1 | 1 | 505.8033  |
| 77064  | 8  | 8  | 13.5 | 2102 | 1 | 1 | 0 | 691.3322  |
| 77064  | 8  | 8  | 13.5 | 2378 | 1 | 1 | 0 | 731.3889  |
| 77064  | 8  | 8  | 13.5 | 2650 | 1 | 1 | 0 | 790.4092  |
| 77064  | 8  | 8  | 13.5 | 2983 | 1 | 1 | 1 | 876.4508  |
| 77064  | 8  | 8  | 13.5 | 3198 | 1 | 1 | 0 | 617.0069  |
| 42056  | 7  | 7  | 27.3 | 144  | 1 | 0 | 0 | 400.7712  |
| 42056  | 7  | 7  | 27.3 | 579  | 1 | 0 | 0 | 488.7275  |
| 42056  | 7  | 7  | 27.3 | 1251 | 1 | 0 | 0 | 582.3021  |
| 42056  | 7  | 7  | 27.3 | 1387 | 1 | 0 | 0 | 599.8561  |
| 42056  | 7  | 7  | 27.3 | 3066 | 1 | 1 | 1 | 895.9492  |
| 42056  | 7  | 7  | 27.3 | 3456 | 1 | 0 | 1 | 657.0332  |
| 42056  | 7  | 7  | 27.3 | 5262 | 1 | 0 | 0 | 1051.2183 |
| 98766  | 7  | 7  | 11.1 | 1218 | 1 | 1 | 1 | 578.7748  |
| 98766  | 7  | 7  | 11.1 | 1662 | 1 | 1 | 1 | 634.3086  |
| 98766  | 7  | 7  | 11.1 | 1920 | 1 | 1 | 1 | 668.841   |
| 98766  | 7  | 7  | 11.1 | 2193 | 1 | 1 | 0 | 702.4367  |

|        |   |   |      |      |   |   |   |           |
|--------|---|---|------|------|---|---|---|-----------|
| 98766  | 7 | 7 | 11.1 | 2917 | 1 | 1 | 1 | 858.5213  |
| 98766  | 7 | 7 | 11.1 | 3616 | 1 | 1 | 1 | 1027.5264 |
| 98766  | 7 | 7 | 11.1 | 3727 | 1 | 1 | 1 | 704.689   |
| 31671  | 6 | 6 | 26.2 | 594  | 1 | 1 | 1 | 492.2529  |
| 31671  | 6 | 6 | 26.2 | 1378 | 1 | 1 | 1 | 598.2955  |
| 31671  | 6 | 6 | 26.2 | 1848 | 1 | 1 | 1 | 657.3209  |
| 31671  | 6 | 6 | 26.2 | 2387 | 1 | 1 | 1 | 733.393   |
| 31671  | 6 | 6 | 26.2 | 2697 | 1 | 1 | 1 | 805.4064  |
| 31671  | 6 | 6 | 26.2 | 3425 | 1 | 1 | 1 | 975.4651  |
| 103283 | 4 | 4 | 5.6  | 727  | 1 | 1 | 1 | 510.2595  |
| 103283 | 4 | 4 | 5.6  | 1748 | 1 | 1 | 1 | 642.315   |
| 103283 | 4 | 4 | 5.6  | 2382 | 1 | 1 | 1 | 731.8884  |
| 103283 | 4 | 4 | 5.6  | 3165 | 1 | 1 | 1 | 918.9736  |
| 120769 | 6 | 6 | 7    | 1524 | 1 | 1 | 1 | 617.316   |
| 120769 | 6 | 6 | 7    | 1614 | 1 | 1 | 1 | 629.8552  |
| 120769 | 6 | 6 | 7    | 1708 | 1 | 1 | 1 | 639.3404  |
| 120769 | 6 | 6 | 7    | 1741 | 1 | 1 | 1 | 641.3161  |
| 120769 | 6 | 6 | 7    | 2608 | 1 | 1 | 1 | 778.4381  |
| 120769 | 6 | 6 | 7    | 2614 | 1 | 1 | 1 | 780.3881  |
| 27673  | 4 | 3 | 16.8 | 1762 | 1 | 1 | 1 | 644.8374  |
| 27673  | 4 | 3 | 16.8 | 2255 | 1 | 1 | 1 | 712.3347  |
| 27673  | 4 | 3 | 16.8 | 3408 | 1 | 1 | 1 | 971.9988  |
| 49607  | 5 | 4 | 13.2 | 1445 | 1 | 1 | 1 | 607.3429  |
| 49607  | 5 | 4 | 13.2 | 2667 | 1 | 1 | 1 | 794.8994  |
| 49607  | 5 | 4 | 13.2 | 3039 | 1 | 0 | 0 | 590.2672  |
| 49607  | 5 | 4 | 13.2 | 3760 | 1 | 1 | 1 | 1065.0404 |
| 73187  | 4 | 3 | 6.1  | 1320 | 1 | 1 | 1 | 591.3666  |
| 73187  | 4 | 3 | 6.1  | 1528 | 1 | 1 | 1 | 617.3513  |
| 73187  | 4 | 3 | 6.1  | 3275 | 1 | 1 | 1 | 941.5558  |
| 64169  | 5 | 5 | 12   | 1236 | 1 | 1 | 0 | 580.798   |
| 64169  | 5 | 5 | 12   | 1393 | 1 | 1 | 1 | 600.3354  |
| 64169  | 5 | 5 | 12   | 1740 | 1 | 1 | 0 | 640.8872  |
| 64169  | 5 | 5 | 12   | 2876 | 1 | 1 | 0 | 850.9528  |
| 64169  | 5 | 5 | 12   | 3333 | 1 | 1 | 0 | 950.5214  |
| 39964  | 5 | 5 | 18.8 | 1368 | 1 | 0 | 0 | 597.3351  |
| 39964  | 5 | 5 | 18.8 | 1458 | 1 | 0 | 0 | 609.3064  |
| 39964  | 5 | 5 | 18.8 | 2256 | 1 | 0 | 0 | 712.3353  |
| 39964  | 5 | 5 | 18.8 | 2395 | 1 | 1 | 1 | 735.4067  |
| 39964  | 5 | 5 | 18.8 | 4532 | 1 | 0 | 0 | 829.4093  |
| 109501 | 3 | 3 | 5.6  | 2970 | 1 | 1 | 1 | 874.4514  |
| 109501 | 3 | 3 | 5.6  | 3361 | 1 | 1 | 1 | 957.9862  |
| 109501 | 3 | 3 | 5.6  | 4512 | 1 | 1 | 1 | 1231.1436 |
| 23090  | 4 | 4 | 23.2 | 645  | 1 | 1 | 0 | 499.7851  |
| 23090  | 4 | 4 | 23.2 | 1367 | 1 | 1 | 0 | 398.544   |
| 23090  | 4 | 4 | 23.2 | 2192 | 1 | 1 | 1 | 702.4038  |
| 23090  | 4 | 4 | 23.2 | 2734 | 1 | 1 | 0 | 816.4186  |
| 32499  | 4 | 4 | 21.1 | 460  | 1 | 1 | 1 | 470.795   |
| 32499  | 4 | 4 | 21.1 | 3239 | 1 | 1 | 1 | 933.0275  |
| 32499  | 4 | 4 | 21.1 | 3664 | 1 | 1 | 1 | 694.6491  |
| 32499  | 4 | 4 | 21.1 | 3911 | 1 | 1 | 1 | 1097.0179 |
| 63627  | 5 | 5 | 12.1 | 1236 | 1 | 0 | 0 | 580.798   |
| 63627  | 5 | 5 | 12.1 | 1514 | 1 | 1 | 1 | 615.3529  |
| 63627  | 5 | 5 | 12.1 | 1740 | 1 | 0 | 0 | 640.8872  |
| 63627  | 5 | 5 | 12.1 | 2876 | 1 | 0 | 0 | 850.9528  |
| 63627  | 5 | 5 | 12.1 | 3333 | 1 | 0 | 0 | 950.5214  |
| 94743  | 4 | 4 | 7.7  | 2352 | 1 | 1 | 1 | 726.8488  |
| 94743  | 4 | 4 | 7.7  | 2524 | 1 | 1 | 1 | 759.8389  |
| 94743  | 4 | 4 | 7.7  | 3085 | 1 | 1 | 1 | 900.4693  |

|        |   |   |      |      |   |   |   |           |
|--------|---|---|------|------|---|---|---|-----------|
| 94743  | 4 | 4 | 7.7  | 4099 | 1 | 1 | 1 | 1129.1045 |
| 63798  | 7 | 7 | 16.9 | 1232 | 1 | 0 | 0 | 580.2545  |
| 63798  | 7 | 7 | 16.9 | 1347 | 1 | 0 | 0 | 594.3549  |
| 63798  | 7 | 7 | 16.9 | 1688 | 1 | 1 | 1 | 637.8403  |
| 63798  | 7 | 7 | 16.9 | 2431 | 1 | 1 | 1 | 495.5685  |
| 63798  | 7 | 7 | 16.9 | 2570 | 1 | 1 | 1 | 513.2853  |
| 63798  | 7 | 7 | 16.9 | 3076 | 1 | 1 | 1 | 898.8766  |
| 63798  | 7 | 7 | 16.9 | 4480 | 1 | 0 | 0 | 1205.5711 |
| 137407 | 4 | 4 | 4.8  | 2469 | 1 | 1 | 1 | 748.9221  |
| 137407 | 4 | 4 | 4.8  | 2583 | 1 | 1 | 1 | 772.8988  |
| 137407 | 4 | 4 | 4.8  | 2709 | 1 | 1 | 1 | 809.9285  |
| 137407 | 4 | 4 | 4.8  | 3358 | 1 | 1 | 1 | 957.077   |
| 49487  | 3 | 2 | 6.1  | 1541 | 1 | 1 | 1 | 619.3299  |
| 49487  | 3 | 2 | 6.1  | 2982 | 1 | 1 | 1 | 876.4356  |
| 100826 | 4 | 3 | 4.8  | 1801 | 1 | 1 | 1 | 651.3293  |
| 100826 | 4 | 3 | 4.8  | 2582 | 1 | 1 | 1 | 515.2837  |
| 100826 | 4 | 3 | 4.8  | 3590 | 1 | 1 | 1 | 1023.0549 |
| 41834  | 6 | 6 | 15.3 | 96   | 1 | 0 | 0 | 386.2272  |
| 41834  | 6 | 6 | 15.3 | 406  | 1 | 0 | 0 | 459.2945  |
| 41834  | 6 | 6 | 15.3 | 494  | 1 | 1 | 1 | 476.248   |
| 41834  | 6 | 6 | 15.3 | 1505 | 1 | 1 | 1 | 614.8141  |
| 41834  | 6 | 6 | 15.3 | 2014 | 1 | 0 | 1 | 680.8599  |
| 41834  | 6 | 6 | 15.3 | 2331 | 1 | 0 | 0 | 723.8744  |
| 22118  | 6 | 5 | 34.5 | 352  | 1 | 1 | 1 | 449.7531  |
| 22118  | 6 | 5 | 34.5 | 1282 | 1 | 1 | 1 | 585.8055  |
| 22118  | 6 | 5 | 34.5 | 2652 | 1 | 1 | 1 | 791.9304  |
| 22118  | 6 | 5 | 34.5 | 3068 | 1 | 1 | 1 | 598.305   |
| 22118  | 6 | 5 | 34.5 | 3240 | 1 | 1 | 1 | 933.4741  |
| 44356  | 5 | 5 | 19.2 | 14   | 1 | 1 | 1 | 355.7009  |
| 44356  | 5 | 5 | 19.2 | 339  | 1 | 1 | 1 | 443.243   |
| 44356  | 5 | 5 | 19.2 | 1730 | 1 | 1 | 1 | 639.8163  |
| 44356  | 5 | 5 | 19.2 | 3930 | 1 | 1 | 1 | 1101.5532 |
| 44356  | 5 | 5 | 19.2 | 5506 | 1 | 1 | 1 | 1125.1973 |
| 59765  | 3 | 3 | 7.7  | 2266 | 1 | 1 | 1 | 713.3907  |
| 59765  | 3 | 3 | 7.7  | 2455 | 1 | 1 | 1 | 746.8905  |
| 59765  | 3 | 3 | 7.7  | 3235 | 1 | 1 | 1 | 932.9756  |
| 86221  | 3 | 3 | 5.5  | 746  | 1 | 1 | 1 | 513.8011  |
| 86221  | 3 | 3 | 5.5  | 1588 | 1 | 1 | 1 | 625.8224  |
| 86221  | 3 | 3 | 5.5  | 4316 | 1 | 1 | 1 | 1154.5809 |
| 72129  | 3 | 2 | 5.1  | 3046 | 1 | 1 | 1 | 886.0202  |
| 72129  | 3 | 2 | 5.1  | 3378 | 1 | 1 | 1 | 963.0168  |
| 53612  | 5 | 5 | 15.8 | 786  | 1 | 1 | 1 | 520.3113  |
| 53612  | 5 | 5 | 15.8 | 1581 | 1 | 1 | 1 | 624.8201  |
| 53612  | 5 | 5 | 15.8 | 1881 | 1 | 1 | 1 | 662.3357  |
| 53612  | 5 | 5 | 15.8 | 4338 | 1 | 1 | 1 | 1160.6032 |
| 53612  | 5 | 5 | 15.8 | 4642 | 1 | 1 | 1 | 885.1405  |
| 615675 | 5 | 5 | 1.5  | 2248 | 1 | 1 | 1 | 710.8935  |
| 615675 | 5 | 5 | 1.5  | 2580 | 1 | 1 | 1 | 771.4275  |
| 615675 | 5 | 5 | 1.5  | 2715 | 1 | 1 | 1 | 810.4536  |
| 615675 | 5 | 5 | 1.5  | 3610 | 1 | 1 | 1 | 1027.5091 |
| 615675 | 5 | 5 | 1.5  | 4873 | 1 | 1 | 1 | 931.1344  |
| 44425  | 3 | 3 | 12.9 | 584  | 1 | 1 | 1 | 489.7662  |
| 44425  | 3 | 3 | 12.9 | 2548 | 1 | 1 | 1 | 766.366   |
| 44425  | 3 | 3 | 12.9 | 5217 | 1 | 1 | 1 | 1037.1788 |
| 40630  | 5 | 5 | 15.9 | 654  | 1 | 1 | 1 | 500.7922  |
| 40630  | 5 | 5 | 15.9 | 1677 | 1 | 1 | 1 | 636.3565  |
| 40630  | 5 | 5 | 15.9 | 1752 | 1 | 1 | 1 | 643.3628  |
| 40630  | 5 | 5 | 15.9 | 2169 | 1 | 1 | 1 | 466.8966  |

|        |   |   |      |      |   |   |   |           |
|--------|---|---|------|------|---|---|---|-----------|
| 40630  | 5 | 5 | 15.9 | 2236 | 1 | 1 | 1 | 708.3853  |
| 55711  | 2 | 2 | 7.2  | 2615 | 1 | 1 | 1 | 780.9093  |
| 55711  | 2 | 2 | 7.2  | 4425 | 1 | 1 | 1 | 1188.5612 |
| 44960  | 5 | 5 | 16.8 | 1231 | 1 | 0 | 0 | 579.829   |
| 44960  | 5 | 5 | 16.8 | 1246 | 1 | 1 | 1 | 581.7968  |
| 44960  | 5 | 5 | 16.8 | 1701 | 1 | 1 | 0 | 638.849   |
| 44960  | 5 | 5 | 16.8 | 2168 | 1 | 1 | 0 | 699.828   |
| 44960  | 5 | 5 | 16.8 | 3984 | 1 | 1 | 0 | 741.7413  |
| 67813  | 5 | 5 | 9.3  | 823  | 1 | 1 | 1 | 525.267   |
| 67813  | 5 | 5 | 9.3  | 1302 | 1 | 1 | 1 | 587.8209  |
| 67813  | 5 | 5 | 9.3  | 1499 | 1 | 1 | 1 | 613.8586  |
| 67813  | 5 | 5 | 9.3  | 2045 | 1 | 1 | 0 | 684.8177  |
| 67813  | 5 | 5 | 9.3  | 2985 | 1 | 1 | 1 | 877.4851  |
| 34169  | 5 | 4 | 32.2 | 2227 | 1 | 1 | 0 | 706.4239  |
| 34169  | 5 | 4 | 32.2 | 5132 | 1 | 1 | 1 | 997.5598  |
| 34169  | 5 | 4 | 32.2 | 5284 | 1 | 1 | 0 | 1058.8863 |
| 34169  | 5 | 4 | 32.2 | 5723 | 1 | 1 | 0 | 1184.3097 |
| 25092  | 3 | 3 | 19.8 | 2616 | 1 | 1 | 1 | 781.3654  |
| 25092  | 3 | 3 | 19.8 | 2784 | 1 | 1 | 1 | 829.3752  |
| 25092  | 3 | 3 | 19.8 | 2887 | 1 | 1 | 1 | 852.9487  |
| 40331  | 3 | 3 | 11.7 | 1352 | 1 | 1 | 1 | 595.3246  |
| 40331  | 3 | 3 | 11.7 | 1976 | 1 | 1 | 1 | 676.8248  |
| 40331  | 3 | 3 | 11.7 | 3134 | 1 | 1 | 1 | 912.479   |
| 286993 | 5 | 5 | 3.3  | 2022 | 1 | 1 | 1 | 681.8763  |
| 286993 | 5 | 5 | 3.3  | 3000 | 1 | 1 | 1 | 881.4818  |
| 286993 | 5 | 5 | 3.3  | 3602 | 1 | 1 | 1 | 1025.0561 |
| 286993 | 5 | 5 | 3.3  | 3914 | 1 | 1 | 1 | 1097.6201 |
| 286993 | 5 | 5 | 3.3  | 4036 | 1 | 1 | 1 | 747.3963  |
| 80376  | 5 | 5 | 8.3  | 20   | 1 | 1 | 1 | 357.729   |
| 80376  | 5 | 5 | 8.3  | 1607 | 1 | 1 | 0 | 628.8514  |
| 80376  | 5 | 5 | 8.3  | 1767 | 1 | 1 | 0 | 646.3248  |
| 80376  | 5 | 5 | 8.3  | 2542 | 1 | 1 | 1 | 764.4033  |
| 80376  | 5 | 5 | 8.3  | 2654 | 1 | 1 | 1 | 528.6017  |
| 83408  | 4 | 4 | 5.8  | 623  | 1 | 1 | 1 | 495.7846  |
| 83408  | 4 | 4 | 5.8  | 791  | 1 | 1 | 1 | 521.7508  |
| 83408  | 4 | 4 | 5.8  | 1606 | 1 | 1 | 1 | 628.8296  |
| 83408  | 4 | 4 | 5.8  | 2806 | 1 | 1 | 1 | 833.4284  |
| 44816  | 7 | 7 | 17.7 | 135  | 1 | 1 | 1 | 398.2215  |
| 44816  | 7 | 7 | 17.7 | 451  | 1 | 1 | 1 | 469.2825  |
| 44816  | 7 | 7 | 17.7 | 598  | 1 | 1 | 1 | 492.2739  |
| 44816  | 7 | 7 | 17.7 | 765  | 1 | 1 | 1 | 517.2859  |
| 44816  | 7 | 7 | 17.7 | 1591 | 1 | 1 | 1 | 626.7977  |
| 44816  | 7 | 7 | 17.7 | 1873 | 1 | 1 | 1 | 660.8383  |
| 44816  | 7 | 7 | 17.7 | 2678 | 1 | 1 | 1 | 532.9035  |
| 45894  | 6 | 4 | 14   | 176  | 1 | 1 | 1 | 408.7504  |
| 45894  | 6 | 4 | 14   | 1231 | 1 | 0 | 0 | 579.829   |
| 45894  | 6 | 4 | 14   | 3541 | 1 | 1 | 1 | 671.9987  |
| 45894  | 6 | 4 | 14   | 3561 | 1 | 1 | 1 | 1015.0344 |
| 44974  | 3 | 2 | 8.1  | 2091 | 1 | 1 | 1 | 690.3616  |
| 44974  | 3 | 2 | 8.1  | 3835 | 1 | 1 | 1 | 1079.5026 |
| 38472  | 2 | 2 | 8.5  | 2268 | 1 | 1 | 1 | 713.8838  |
| 38472  | 2 | 2 | 8.5  | 2996 | 1 | 1 | 1 | 880.9543  |
| 31696  | 3 | 3 | 10.8 | 486  | 1 | 1 | 1 | 475.2763  |
| 31696  | 3 | 3 | 10.8 | 1468 | 1 | 1 | 1 | 610.3319  |
| 31696  | 3 | 3 | 10.8 | 2214 | 1 | 1 | 1 | 704.8826  |
| 90209  | 2 | 2 | 3.2  | 1383 | 1 | 1 | 1 | 599.2982  |
| 90209  | 2 | 2 | 3.2  | 2560 | 1 | 1 | 1 | 768.368   |
| 65220  | 4 | 3 | 10.3 | 2939 | 1 | 1 | 1 | 865.9222  |

|        |   |   |      |      |   |   |   |           |
|--------|---|---|------|------|---|---|---|-----------|
| 65220  | 4 | 3 | 10.3 | 3847 | 1 | 1 | 1 | 722.7046  |
| 65220  | 4 | 3 | 10.3 | 4637 | 1 | 1 | 1 | 881.4528  |
| 44788  | 4 | 4 | 11.6 | 369  | 1 | 1 | 1 | 453.2289  |
| 44788  | 4 | 4 | 11.6 | 770  | 1 | 1 | 1 | 517.7683  |
| 44788  | 4 | 4 | 11.6 | 2323 | 1 | 1 | 1 | 482.2241  |
| 44788  | 4 | 4 | 11.6 | 3384 | 1 | 1 | 1 | 965.4058  |
| 30060  | 3 | 3 | 16.4 | 1442 | 1 | 1 | 1 | 607.2845  |
| 30060  | 3 | 3 | 16.4 | 2714 | 1 | 1 | 1 | 810.4493  |
| 30060  | 3 | 3 | 16.4 | 3622 | 1 | 1 | 1 | 1029.4876 |
| 17591  | 4 | 3 | 24.3 | 785  | 1 | 1 | 1 | 520.2959  |
| 17591  | 4 | 3 | 24.3 | 855  | 1 | 1 | 1 | 530.7824  |
| 17591  | 4 | 3 | 24.3 | 3703 | 1 | 1 | 1 | 1051.0326 |
| 40463  | 3 | 2 | 5.9  | 630  | 1 | 1 | 1 | 497.2806  |
| 40463  | 3 | 2 | 5.9  | 2645 | 1 | 1 | 1 | 789.3995  |
| 194402 | 4 | 4 | 3.8  | 710  | 1 | 1 | 1 | 508.2739  |
| 194402 | 4 | 4 | 3.8  | 2297 | 1 | 1 | 1 | 718.3744  |
| 194402 | 4 | 4 | 3.8  | 3586 | 1 | 1 | 1 | 1020.5619 |
| 194402 | 4 | 4 | 3.8  | 4649 | 1 | 1 | 1 | 887.8182  |
| 264216 | 2 | 2 | 1.2  | 1650 | 1 | 1 | 1 | 633.2961  |
| 264216 | 2 | 2 | 1.2  | 3416 | 1 | 1 | 1 | 973.0233  |
| 20970  | 2 | 2 | 13.4 | 1318 | 1 | 1 | 1 | 591.3533  |
| 20970  | 2 | 2 | 13.4 | 2597 | 1 | 1 | 1 | 775.8847  |
| 47389  | 4 | 4 | 14.6 | 1231 | 1 | 0 | 0 | 579.829   |
| 47389  | 4 | 4 | 14.6 | 2426 | 1 | 1 | 1 | 493.9595  |
| 47389  | 4 | 4 | 14.6 | 3398 | 1 | 1 | 1 | 969.9751  |
| 47389  | 4 | 4 | 14.6 | 3673 | 1 | 1 | 1 | 696.673   |
| 20667  | 3 | 3 | 16   | 979  | 1 | 1 | 1 | 545.3187  |
| 20667  | 3 | 3 | 16   | 1023 | 1 | 1 | 1 | 552.3099  |
| 20667  | 3 | 3 | 16   | 3717 | 1 | 1 | 1 | 703.0358  |
| 19009  | 2 | 2 | 14.6 | 1610 | 1 | 1 | 1 | 629.3735  |
| 19009  | 2 | 2 | 14.6 | 2120 | 1 | 1 | 1 | 692.8591  |
| 67582  | 2 | 2 | 4    | 1624 | 1 | 1 | 1 | 630.8453  |
| 67582  | 2 | 2 | 4    | 1903 | 1 | 1 | 1 | 665.8608  |
| 20989  | 3 | 3 | 19.2 | 590  | 1 | 1 | 1 | 491.2627  |
| 20989  | 3 | 3 | 19.2 | 2004 | 1 | 1 | 1 | 679.8668  |
| 20989  | 3 | 3 | 19.2 | 2557 | 1 | 1 | 1 | 766.9186  |
| 38757  | 2 | 2 | 9.5  | 2336 | 1 | 1 | 1 | 483.9074  |
| 38757  | 2 | 2 | 9.5  | 3754 | 1 | 1 | 1 | 1064.5179 |
| 82214  | 2 | 2 | 3.9  | 1940 | 1 | 1 | 1 | 671.3855  |
| 82214  | 2 | 2 | 3.9  | 2736 | 1 | 1 | 1 | 816.4415  |
| 52003  | 3 | 2 | 8.2  | 2814 | 1 | 1 | 1 | 558.9713  |
| 52003  | 3 | 2 | 8.2  | 4528 | 1 | 1 | 1 | 827.7833  |
| 61584  | 3 | 2 | 6.4  | 1661 | 1 | 1 | 1 | 634.2915  |
| 61584  | 3 | 2 | 6.4  | 4541 | 1 | 1 | 1 | 1250.691  |
| 73869  | 3 | 3 | 5.4  | 1217 | 1 | 1 | 1 | 578.3272  |
| 73869  | 3 | 3 | 5.4  | 1603 | 1 | 0 | 0 | 628.813   |
| 73869  | 3 | 3 | 5.4  | 2460 | 1 | 1 | 1 | 747.8647  |
| 55890  | 3 | 3 | 8.6  | 529  | 1 | 1 | 1 | 481.7687  |
| 55890  | 3 | 3 | 8.6  | 2253 | 1 | 1 | 1 | 475.2101  |
| 55890  | 3 | 3 | 8.6  | 4453 | 1 | 1 | 1 | 797.7518  |
| 119913 | 2 | 2 | 2.2  | 375  | 1 | 1 | 0 | 453.756   |
| 119913 | 2 | 2 | 2.2  | 2893 | 1 | 1 | 1 | 852.998   |
| 43168  | 3 | 3 | 8.1  | 82   | 1 | 1 | 1 | 383.2162  |
| 43168  | 3 | 3 | 8.1  | 1422 | 1 | 1 | 1 | 603.807   |
| 43168  | 3 | 3 | 8.1  | 2357 | 1 | 1 | 1 | 727.3806  |
| 14066  | 2 | 2 | 18.5 | 1237 | 1 | 1 | 1 | 580.8171  |
| 14066  | 2 | 2 | 18.5 | 1262 | 1 | 1 | 0 | 583.8056  |
| 69890  | 2 | 2 | 3.9  | 982  | 1 | 1 | 1 | 545.7903  |

|        |   |   |      |      |   |   |   |           |
|--------|---|---|------|------|---|---|---|-----------|
| 69890  | 2 | 2 | 3.9  | 2905 | 1 | 1 | 1 | 569.599   |
| 48286  | 2 | 2 | 4.9  | 62   | 1 | 1 | 1 | 374.7213  |
| 48286  | 2 | 2 | 4.9  | 2953 | 1 | 1 | 1 | 869.4269  |
| 125058 | 2 | 2 | 3.7  | 1263 | 1 | 1 | 1 | 583.8065  |
| 125058 | 2 | 2 | 3.7  | 5304 | 1 | 1 | 1 | 1066.5441 |
| 29898  | 4 | 4 | 12.6 | 474  | 1 | 1 | 1 | 472.7743  |
| 29898  | 4 | 4 | 12.6 | 1492 | 1 | 1 | 1 | 613.3701  |
| 29898  | 4 | 4 | 12.6 | 2037 | 1 | 1 | 1 | 683.8425  |
| 29898  | 4 | 4 | 12.6 | 2394 | 1 | 1 | 1 | 490.2936  |
| 65977  | 3 | 3 | 6.1  | 1315 | 1 | 1 | 1 | 591.2935  |
| 65977  | 3 | 3 | 6.1  | 1763 | 1 | 1 | 1 | 644.861   |
| 65977  | 3 | 3 | 6.1  | 2567 | 1 | 1 | 1 | 768.9842  |
| 114571 | 2 | 2 | 2.1  | 416  | 1 | 1 | 1 | 462.2565  |
| 114571 | 2 | 2 | 2.1  | 2527 | 1 | 1 | 1 | 760.399   |
| 29708  | 3 | 3 | 15.7 | 517  | 1 | 1 | 1 | 479.2842  |
| 29708  | 3 | 3 | 15.7 | 1176 | 1 | 1 | 1 | 573.3023  |
| 29708  | 3 | 3 | 15.7 | 5030 | 1 | 1 | 1 | 1442.2215 |
| 71322  | 2 | 2 | 3.9  | 672  | 1 | 1 | 1 | 502.798   |
| 71322  | 2 | 2 | 3.9  | 3273 | 1 | 1 | 1 | 941.4741  |
| 66087  | 2 | 2 | 3.6  | 2845 | 1 | 1 | 1 | 842.4798  |
| 66087  | 2 | 2 | 3.6  | 4345 | 1 | 1 | 1 | 775.1002  |
| 94470  | 3 | 3 | 4.7  | 1307 | 1 | 1 | 1 | 589.314   |
| 94470  | 3 | 3 | 4.7  | 2433 | 1 | 1 | 1 | 742.958   |
| 94470  | 3 | 3 | 4.7  | 3219 | 1 | 1 | 1 | 620.3168  |
| 47357  | 4 | 4 | 11.4 | 459  | 1 | 1 | 1 | 470.7769  |
| 47357  | 4 | 4 | 11.4 | 1665 | 1 | 1 | 1 | 634.8093  |
| 47357  | 4 | 4 | 11.4 | 1841 | 1 | 1 | 1 | 655.3789  |
| 47357  | 4 | 4 | 11.4 | 3423 | 1 | 1 | 1 | 975.4364  |
| 153955 | 2 | 2 | 2.1  | 1786 | 1 | 1 | 1 | 648.4241  |
| 153955 | 2 | 2 | 2.1  | 3410 | 1 | 1 | 1 | 648.3702  |
| 32983  | 2 | 2 | 7.5  | 850  | 1 | 1 | 1 | 529.322   |
| 32983  | 2 | 2 | 7.5  | 1600 | 1 | 1 | 1 | 627.8508  |
| 58865  | 2 | 2 | 5.6  | 1548 | 1 | 1 | 1 | 620.8193  |
| 58865  | 2 | 2 | 5.6  | 3414 | 1 | 1 | 1 | 972.997   |
| 47005  | 3 | 3 | 9.1  | 491  | 1 | 1 | 1 | 475.7685  |
| 47005  | 3 | 3 | 9.1  | 2591 | 1 | 1 | 1 | 774.9477  |
| 47005  | 3 | 3 | 9.1  | 3432 | 1 | 1 | 1 | 654.6627  |
| 29729  | 2 | 2 | 12.8 | 890  | 1 | 1 | 1 | 534.755   |
| 29729  | 2 | 2 | 12.8 | 5003 | 1 | 1 | 1 | 951.505   |
| 47042  | 2 | 2 | 9.5  | 876  | 1 | 1 | 0 | 533.3026  |
| 47042  | 2 | 2 | 9.5  | 5148 | 1 | 1 | 1 | 1007.7667 |
| 123905 | 2 | 2 | 1.9  | 795  | 1 | 1 | 1 | 522.2847  |
| 123905 | 2 | 2 | 1.9  | 1939 | 1 | 1 | 1 | 671.3379  |
| 59235  | 2 | 2 | 4.7  | 2050 | 1 | 1 | 1 | 685.3189  |
| 59235  | 2 | 2 | 4.7  | 2706 | 1 | 1 | 1 | 807.9604  |
| 47036  | 2 | 2 | 5    | 876  | 1 | 0 | 0 | 533.3026  |
| 47036  | 2 | 2 | 5    | 1886 | 1 | 1 | 1 | 662.8522  |
| 59477  | 3 | 3 | 11   | 1379 | 1 | 1 | 1 | 598.3266  |
| 59477  | 3 | 3 | 11   | 3213 | 1 | 1 | 1 | 928.5349  |
| 59477  | 3 | 3 | 11   | 5314 | 1 | 1 | 1 | 1068.2237 |
| 14095  | 2 | 2 | 18.5 | 1179 | 1 | 1 | 1 | 573.8088  |
| 14095  | 2 | 2 | 18.5 | 1262 | 1 | 0 | 0 | 583.8056  |
| 16304  | 2 | 2 | 16   | 835  | 1 | 1 | 1 | 527.7864  |
| 16304  | 2 | 2 | 16   | 2322 | 1 | 1 | 1 | 722.3694  |
| 28210  | 2 | 2 | 5    | 71   | 1 | 1 | 1 | 378.2604  |
| 28210  | 2 | 2 | 5    | 104  | 1 | 1 | 1 | 387.7655  |
| 116744 | 2 | 2 | 3.3  | 2115 | 1 | 1 | 1 | 692.3507  |
| 116744 | 2 | 2 | 3.3  | 3969 | 1 | 1 | 1 | 740.1071  |

|           |              |              |            |           |          |            |              |            |
|-----------|--------------|--------------|------------|-----------|----------|------------|--------------|------------|
| 86361     | 2            | 2            | 2.9        | 187       | 1        | 1          | 1            | 412.2268   |
| 86361     | 2            | 2            | 2.9        | 2778      | 1        | 1          | 1            | 826.0054   |
| 86221     | 2            | 2            | 2.8        | 762       | 1        | 1          | 1            | 516.8135   |
| 86221     | 2            | 2            | 2.8        | 2558      | 1        | 1          | 1            | 767.9348   |
| 109254    | 2            | 2            | 2.4        | 905       | 1        | 1          | 1            | 536.8291   |
| 109254    | 2            | 2            | 2.4        | 2702      | 1        | 1          | 1            | 538.626    |
| 130510    | 2            | 2            | 2.2        | 706       | 1        | 1          | 1            | 507.2906   |
| 130510    | 2            | 2            | 2.2        | 2892      | 1        | 1          | 1            | 852.9644   |
| 55656     | 2            | 2            | 4.4        | 1774      | 1        | 1          | 0            | 647.338    |
| 55656     | 2            | 2            | 4.4        | 2045      | 1        | 0          | 1            | 684.8177   |
| 33803     | 2            | 2            | 6.6        | 1129      | 1        | 1          | 1            | 567.2611   |
| 33803     | 2            | 2            | 6.6        | 1550      | 1        | 1          | 1            | 620.8485   |
| 22104     | 2            | 2            | 8.9        | 490       | 1        | 1          | 1            | 475.7684   |
| 22104     | 2            | 2            | 8.9        | 865       | 1        | 1          | 1            | 532.3186   |
| 45968     | 2            | 2            | 5.3        | 923       | 1        | 1          | 1            | 538.2905   |
| 45968     | 2            | 2            | 5.3        | 1980      | 1        | 1          | 1            | 677.4211   |
| prot_mass | prot_matches | prot_sequenc | prot_cover | pep_query | pep_rank | pep_isbold | pep_isunique | pep_exp_mz |
| 50361     | 39           | 22           | 69.8       | 699       | 1        | 1          | 1            | 488.7414   |
| 50361     | 39           | 22           | 69.8       | 896       | 1        | 1          | 0            | 514.2821   |
| 50361     | 39           | 22           | 69.8       | 1088      | 1        | 1          | 0            | 359.8492   |
| 50361     | 39           | 22           | 69.8       | 1327      | 1        | 1          | 0            | 570.3503   |
| 50361     | 39           | 22           | 69.8       | 1355      | 1        | 1          | 0            | 573.7986   |
| 50361     | 39           | 22           | 69.8       | 1645      | 1        | 1          | 0            | 608.2958   |
| 50361     | 39           | 22           | 69.8       | 1846      | 1        | 1          | 0            | 634.397    |
| 50361     | 39           | 22           | 69.8       | 1979      | 1        | 1          | 1            | 650.3146   |
| 50361     | 39           | 22           | 69.8       | 2342      | 1        | 1          | 0            | 701.8322   |
| 50361     | 39           | 22           | 69.8       | 2977      | 1        | 1          | 0            | 819.927    |
| 50361     | 39           | 22           | 69.8       | 3080      | 1        | 1          | 0            | 840.4014   |
| 50361     | 39           | 22           | 69.8       | 3137      | 1        | 1          | 0            | 848.9192   |
| 50361     | 39           | 22           | 69.8       | 3499      | 1        | 1          | 0            | 911.9646   |
| 50361     | 39           | 22           | 69.8       | 3906      | 1        | 1          | 0            | 976.4474   |
| 50361     | 39           | 22           | 69.8       | 3962      | 1        | 1          | 0            | 987.001    |
| 50361     | 39           | 22           | 69.8       | 4249      | 1        | 1          | 0            | 701.0352   |
| 50361     | 39           | 22           | 69.8       | 4295      | 1        | 1          | 0            | 709.3574   |
| 50361     | 39           | 22           | 69.8       | 4965      | 1        | 1          | 0            | 1184.0666  |
| 50361     | 39           | 22           | 69.8       | 5472      | 1        | 1          | 0            | 922.112    |
| 50361     | 39           | 22           | 69.8       | 5553      | 1        | 1          | 0            | 933.4537   |
| 50361     | 39           | 22           | 69.8       | 5978      | 1        | 1          | 1            | 800.8735   |
| 50361     | 39           | 22           | 69.8       | 6100      | 1        | 1          | 1            | 1109.5067  |
| 51385     | 36           | 23           | 63.8       | 1016      | 1        | 1          | 0            | 530.2681   |
| 51385     | 36           | 23           | 63.8       | 1088      | 1        | 0          | 0            | 359.8492   |
| 51385     | 36           | 23           | 63.8       | 1327      | 1        | 0          | 0            | 570.3503   |
| 51385     | 36           | 23           | 63.8       | 1355      | 1        | 0          | 0            | 573.7986   |
| 51385     | 36           | 23           | 63.8       | 1645      | 1        | 0          | 0            | 608.2958   |
| 51385     | 36           | 23           | 63.8       | 1846      | 1        | 0          | 0            | 634.397    |
| 51385     | 36           | 23           | 63.8       | 1934      | 1        | 1          | 0            | 644.3329   |
| 51385     | 36           | 23           | 63.8       | 1967      | 1        | 1          | 1            | 648.8071   |
| 51385     | 36           | 23           | 63.8       | 2401      | 1        | 1          | 0            | 708.8486   |
| 51385     | 36           | 23           | 63.8       | 2489      | 1        | 1          | 1            | 723.3266   |
| 51385     | 36           | 23           | 63.8       | 2532      | 1        | 1          | 0            | 731.8453   |
| 51385     | 36           | 23           | 63.8       | 2977      | 1        | 0          | 0            | 819.927    |
| 51385     | 36           | 23           | 63.8       | 3080      | 1        | 0          | 0            | 840.4014   |
| 51385     | 36           | 23           | 63.8       | 3137      | 1        | 0          | 0            | 848.9192   |
| 51385     | 36           | 23           | 63.8       | 3368      | 1        | 1          | 1            | 889.9346   |
| 51385     | 36           | 23           | 63.8       | 3499      | 1        | 0          | 0            | 911.9646   |
| 51385     | 36           | 23           | 63.8       | 3652      | 1        | 1          | 1            | 936.9383   |
| 51385     | 36           | 23           | 63.8       | 3906      | 1        | 0          | 0            | 976.4474   |
| 51385     | 36           | 23           | 63.8       | 3962      | 1        | 0          | 0            | 987.001    |

|       |    |    |      |      |   |   |   |           |
|-------|----|----|------|------|---|---|---|-----------|
| 51385 | 36 | 23 | 63.8 | 4249 | 1 | 0 | 0 | 701.0352  |
| 51385 | 36 | 23 | 63.8 | 4295 | 1 | 0 | 0 | 709.3574  |
| 51385 | 36 | 23 | 63.8 | 5477 | 1 | 1 | 0 | 923.1111  |
| 51385 | 36 | 23 | 63.8 | 5564 | 1 | 1 | 1 | 934.7713  |
| 51341 | 36 | 21 | 59.7 | 1016 | 1 | 0 | 0 | 530.2681  |
| 51341 | 36 | 21 | 59.7 | 1088 | 1 | 0 | 0 | 359.8492  |
| 51341 | 36 | 21 | 59.7 | 1327 | 1 | 0 | 0 | 570.3503  |
| 51341 | 36 | 21 | 59.7 | 1355 | 1 | 0 | 0 | 573.7986  |
| 51341 | 36 | 21 | 59.7 | 1645 | 1 | 0 | 0 | 608.2958  |
| 51341 | 36 | 21 | 59.7 | 1846 | 1 | 0 | 0 | 634.397   |
| 51341 | 36 | 21 | 59.7 | 1934 | 1 | 0 | 0 | 644.3329  |
| 51341 | 36 | 21 | 59.7 | 2011 | 1 | 1 | 1 | 654.8244  |
| 51341 | 36 | 21 | 59.7 | 2342 | 1 | 0 | 0 | 701.8322  |
| 51341 | 36 | 21 | 59.7 | 2442 | 1 | 1 | 0 | 716.3194  |
| 51341 | 36 | 21 | 59.7 | 2532 | 1 | 0 | 0 | 731.8453  |
| 51341 | 36 | 21 | 59.7 | 2977 | 1 | 0 | 0 | 819.927   |
| 51341 | 36 | 21 | 59.7 | 3039 | 1 | 1 | 0 | 833.3937  |
| 51341 | 36 | 21 | 59.7 | 3137 | 1 | 0 | 0 | 848.9192  |
| 51341 | 36 | 21 | 59.7 | 3395 | 1 | 1 | 1 | 895.4434  |
| 51341 | 36 | 21 | 59.7 | 3761 | 1 | 1 | 1 | 950.4709  |
| 51341 | 36 | 21 | 59.7 | 3906 | 1 | 0 | 0 | 976.4474  |
| 51341 | 36 | 21 | 59.7 | 3962 | 1 | 0 | 0 | 987.001   |
| 51341 | 36 | 21 | 59.7 | 4249 | 1 | 0 | 0 | 701.0352  |
| 51341 | 36 | 21 | 59.7 | 5409 | 1 | 1 | 1 | 913.1083  |
| 51341 | 36 | 21 | 59.7 | 5591 | 1 | 1 | 0 | 938.783   |
| 50310 | 35 | 19 | 54.5 | 896  | 1 | 0 | 0 | 514.2821  |
| 50310 | 35 | 19 | 54.5 | 1088 | 1 | 0 | 0 | 359.8492  |
| 50310 | 35 | 19 | 54.5 | 1327 | 1 | 0 | 0 | 570.3503  |
| 50310 | 35 | 19 | 54.5 | 1355 | 1 | 0 | 0 | 573.7986  |
| 50310 | 35 | 19 | 54.5 | 1645 | 1 | 0 | 0 | 608.2958  |
| 50310 | 35 | 19 | 54.5 | 1846 | 1 | 0 | 0 | 634.397   |
| 50310 | 35 | 19 | 54.5 | 1974 | 1 | 1 | 1 | 649.8221  |
| 50310 | 35 | 19 | 54.5 | 2342 | 1 | 0 | 0 | 701.8322  |
| 50310 | 35 | 19 | 54.5 | 2977 | 1 | 0 | 0 | 819.927   |
| 50310 | 35 | 19 | 54.5 | 3080 | 1 | 0 | 0 | 840.4014  |
| 50310 | 35 | 19 | 54.5 | 3137 | 1 | 0 | 0 | 848.9192  |
| 50310 | 35 | 19 | 54.5 | 3499 | 1 | 0 | 0 | 911.9646  |
| 50310 | 35 | 19 | 54.5 | 3906 | 1 | 0 | 0 | 976.4474  |
| 50310 | 35 | 19 | 54.5 | 3962 | 1 | 0 | 0 | 987.001   |
| 50310 | 35 | 19 | 54.5 | 4249 | 1 | 0 | 0 | 701.0352  |
| 50310 | 35 | 19 | 54.5 | 4295 | 1 | 0 | 0 | 709.3574  |
| 50310 | 35 | 19 | 54.5 | 4965 | 1 | 0 | 0 | 1184.0666 |
| 50310 | 35 | 19 | 54.5 | 5472 | 1 | 0 | 0 | 922.112   |
| 50310 | 35 | 19 | 54.5 | 5553 | 1 | 0 | 0 | 933.4537  |
| 50194 | 33 | 20 | 74   | 433  | 1 | 1 | 0 | 452.2174  |
| 50194 | 33 | 20 | 74   | 736  | 1 | 1 | 0 | 494.2774  |
| 50194 | 33 | 20 | 74   | 1296 | 1 | 1 | 0 | 566.7869  |
| 50194 | 33 | 20 | 74   | 1916 | 1 | 1 | 0 | 642.2554  |
| 50194 | 33 | 20 | 74   | 2316 | 1 | 1 | 0 | 698.8502  |
| 50194 | 33 | 20 | 74   | 2322 | 1 | 1 | 0 | 466.2575  |
| 50194 | 33 | 20 | 74   | 2555 | 1 | 1 | 0 | 737.4354  |
| 50194 | 33 | 20 | 74   | 2873 | 1 | 1 | 0 | 799.8868  |
| 50194 | 33 | 20 | 74   | 3032 | 1 | 1 | 1 | 832.4405  |
| 50194 | 33 | 20 | 74   | 3153 | 1 | 1 | 0 | 851.4556  |
| 50194 | 33 | 20 | 74   | 3401 | 1 | 1 | 0 | 896.9676  |
| 50194 | 33 | 20 | 74   | 3598 | 1 | 1 | 0 | 929.4446  |
| 50194 | 33 | 20 | 74   | 3707 | 1 | 1 | 0 | 943.4762  |
| 50194 | 33 | 20 | 74   | 3971 | 1 | 1 | 0 | 989.4444  |

|       |    |    |      |      |   |   |   |           |
|-------|----|----|------|------|---|---|---|-----------|
| 50194 | 33 | 20 | 74   | 4934 | 1 | 1 | 0 | 1173.5076 |
| 50194 | 33 | 20 | 74   | 5000 | 1 | 1 | 0 | 795.7362  |
| 50194 | 33 | 20 | 74   | 5023 | 1 | 1 | 0 | 1198.0992 |
| 50194 | 33 | 20 | 74   | 5275 | 1 | 1 | 0 | 1321.1161 |
| 50194 | 33 | 20 | 74   | 6089 | 1 | 1 | 0 | 1107.9135 |
| 50194 | 33 | 20 | 74   | 6704 | 1 | 1 | 0 | 1345.4228 |
| 50191 | 33 | 20 | 74   | 433  | 1 | 0 | 0 | 452.2174  |
| 50191 | 33 | 20 | 74   | 736  | 1 | 0 | 0 | 494.2774  |
| 50191 | 33 | 20 | 74   | 1296 | 1 | 0 | 0 | 566.7869  |
| 50191 | 33 | 20 | 74   | 1916 | 1 | 0 | 0 | 642.2554  |
| 50191 | 33 | 20 | 74   | 2316 | 1 | 0 | 0 | 698.8502  |
| 50191 | 33 | 20 | 74   | 2322 | 1 | 0 | 0 | 466.2575  |
| 50191 | 33 | 20 | 74   | 2555 | 1 | 0 | 0 | 737.4354  |
| 50191 | 33 | 20 | 74   | 2873 | 1 | 0 | 0 | 799.8868  |
| 50191 | 33 | 20 | 74   | 3116 | 1 | 1 | 1 | 845.9453  |
| 50191 | 33 | 20 | 74   | 3153 | 1 | 0 | 0 | 851.4556  |
| 50191 | 33 | 20 | 74   | 3401 | 1 | 0 | 0 | 896.9676  |
| 50191 | 33 | 20 | 74   | 3598 | 1 | 0 | 0 | 929.4446  |
| 50191 | 33 | 20 | 74   | 3707 | 1 | 0 | 0 | 943.4762  |
| 50191 | 33 | 20 | 74   | 3971 | 1 | 0 | 0 | 989.4444  |
| 50191 | 33 | 20 | 74   | 4934 | 1 | 0 | 0 | 1173.5076 |
| 50191 | 33 | 20 | 74   | 5000 | 1 | 0 | 0 | 795.7362  |
| 50191 | 33 | 20 | 74   | 5023 | 1 | 0 | 0 | 1198.0992 |
| 50191 | 33 | 20 | 74   | 5275 | 1 | 0 | 0 | 1321.1161 |
| 50191 | 33 | 20 | 74   | 6089 | 1 | 0 | 0 | 1107.9135 |
| 50191 | 33 | 20 | 74   | 6704 | 1 | 0 | 0 | 1345.4228 |
| 47075 | 28 | 21 | 62.1 | 585  | 1 | 1 | 1 | 475.7504  |
| 47075 | 28 | 21 | 62.1 | 620  | 1 | 1 | 0 | 479.7637  |
| 47075 | 28 | 21 | 62.1 | 804  | 1 | 1 | 0 | 502.7745  |
| 47075 | 28 | 21 | 62.1 | 861  | 1 | 1 | 0 | 509.2767  |
| 47075 | 28 | 21 | 62.1 | 979  | 1 | 1 | 0 | 524.2611  |
| 47075 | 28 | 21 | 62.1 | 1231 | 1 | 1 | 0 | 557.8451  |
| 47075 | 28 | 21 | 62.1 | 1342 | 1 | 1 | 0 | 571.7901  |
| 47075 | 28 | 21 | 62.1 | 1479 | 1 | 1 | 0 | 587.3273  |
| 47075 | 28 | 21 | 62.1 | 2340 | 1 | 1 | 0 | 701.3696  |
| 47075 | 28 | 21 | 62.1 | 2493 | 1 | 1 | 1 | 724.3793  |
| 47075 | 28 | 21 | 62.1 | 2649 | 1 | 1 | 0 | 751.942   |
| 47075 | 28 | 21 | 62.1 | 2824 | 1 | 1 | 1 | 788.4272  |
| 47075 | 28 | 21 | 62.1 | 2853 | 1 | 1 | 0 | 794.3544  |
| 47075 | 28 | 21 | 62.1 | 2858 | 1 | 1 | 0 | 795.4325  |
| 47075 | 28 | 21 | 62.1 | 3513 | 1 | 1 | 0 | 914.4722  |
| 47075 | 28 | 21 | 62.1 | 3814 | 1 | 1 | 0 | 961.0053  |
| 47075 | 28 | 21 | 62.1 | 3817 | 1 | 1 | 0 | 961.5237  |
| 47075 | 28 | 21 | 62.1 | 4195 | 1 | 1 | 0 | 1038.0453 |
| 47075 | 28 | 21 | 62.1 | 5347 | 1 | 1 | 0 | 1350.2014 |
| 47075 | 28 | 21 | 62.1 | 5675 | 1 | 1 | 0 | 1448.2541 |
| 47075 | 28 | 21 | 62.1 | 5909 | 1 | 1 | 1 | 1569.3109 |
| 46960 | 29 | 22 | 69.2 | 535  | 1 | 1 | 0 | 468.263   |
| 46960 | 29 | 22 | 69.2 | 620  | 1 | 0 | 0 | 479.7637  |
| 46960 | 29 | 22 | 69.2 | 700  | 1 | 1 | 1 | 488.7812  |
| 46960 | 29 | 22 | 69.2 | 804  | 1 | 0 | 0 | 502.7745  |
| 46960 | 29 | 22 | 69.2 | 861  | 1 | 0 | 0 | 509.2767  |
| 46960 | 29 | 22 | 69.2 | 979  | 1 | 0 | 0 | 524.2611  |
| 46960 | 29 | 22 | 69.2 | 1195 | 1 | 1 | 1 | 552.8296  |
| 46960 | 29 | 22 | 69.2 | 1231 | 1 | 0 | 0 | 557.8451  |
| 46960 | 29 | 22 | 69.2 | 1342 | 1 | 0 | 0 | 571.7901  |
| 46960 | 29 | 22 | 69.2 | 1479 | 1 | 0 | 0 | 587.3273  |
| 46960 | 29 | 22 | 69.2 | 2340 | 1 | 0 | 0 | 701.3696  |

|        |    |    |      |      |   |   |   |           |
|--------|----|----|------|------|---|---|---|-----------|
| 46960  | 29 | 22 | 69.2 | 2649 | 1 | 0 | 0 | 751.942   |
| 46960  | 29 | 22 | 69.2 | 2853 | 1 | 0 | 0 | 794.3544  |
| 46960  | 29 | 22 | 69.2 | 2858 | 1 | 0 | 0 | 795.4325  |
| 46960  | 29 | 22 | 69.2 | 3513 | 1 | 0 | 0 | 914.4722  |
| 46960  | 29 | 22 | 69.2 | 3814 | 1 | 0 | 0 | 961.0053  |
| 46960  | 29 | 22 | 69.2 | 3817 | 1 | 0 | 0 | 961.5237  |
| 46960  | 29 | 22 | 69.2 | 4195 | 1 | 0 | 0 | 1038.0453 |
| 46960  | 29 | 22 | 69.2 | 5347 | 1 | 0 | 0 | 1350.2014 |
| 46960  | 29 | 22 | 69.2 | 5675 | 1 | 0 | 0 | 1448.2541 |
| 46960  | 29 | 22 | 69.2 | 6398 | 1 | 1 | 1 | 1307.2602 |
| 71712  | 29 | 22 | 51.5 | 1696 | 1 | 1 | 0 | 614.817   |
| 71712  | 29 | 22 | 51.5 | 1709 | 1 | 1 | 0 | 616.3265  |
| 71712  | 29 | 22 | 51.5 | 1960 | 1 | 1 | 0 | 647.8159  |
| 71712  | 29 | 22 | 51.5 | 2003 | 1 | 1 | 1 | 653.866   |
| 71712  | 29 | 22 | 51.5 | 2082 | 1 | 1 | 0 | 665.3104  |
| 71712  | 29 | 22 | 51.5 | 2232 | 1 | 1 | 0 | 687.8081  |
| 71712  | 29 | 22 | 51.5 | 2279 | 1 | 1 | 0 | 693.8682  |
| 71712  | 29 | 22 | 51.5 | 2434 | 1 | 1 | 1 | 713.8857  |
| 71712  | 29 | 22 | 51.5 | 2460 | 1 | 1 | 0 | 718.88    |
| 71712  | 29 | 22 | 51.5 | 2551 | 1 | 1 | 0 | 737.3461  |
| 71712  | 29 | 22 | 51.5 | 2790 | 1 | 1 | 0 | 519.589   |
| 71712  | 29 | 22 | 51.5 | 2806 | 1 | 1 | 1 | 783.9076  |
| 71712  | 29 | 22 | 51.5 | 3030 | 1 | 1 | 0 | 832.4088  |
| 71712  | 29 | 22 | 51.5 | 3058 | 1 | 1 | 0 | 838.3683  |
| 71712  | 29 | 22 | 51.5 | 3086 | 1 | 1 | 0 | 840.9196  |
| 71712  | 29 | 22 | 51.5 | 5194 | 1 | 1 | 1 | 1280.6297 |
| 71712  | 29 | 22 | 51.5 | 5236 | 1 | 1 | 0 | 863.4107  |
| 71712  | 29 | 22 | 51.5 | 5287 | 1 | 1 | 0 | 1329.6356 |
| 71712  | 29 | 22 | 51.5 | 5791 | 1 | 1 | 1 | 1007.4721 |
| 71712  | 29 | 22 | 51.5 | 5794 | 1 | 1 | 1 | 1009.1668 |
| 71712  | 29 | 22 | 51.5 | 5808 | 1 | 1 | 1 | 1526.3534 |
| 71712  | 29 | 22 | 51.5 | 5920 | 1 | 1 | 1 | 1050.17   |
| 615675 | 25 | 22 | 6.1  | 243  | 1 | 1 | 1 | 417.2601  |
| 615675 | 25 | 22 | 6.1  | 473  | 1 | 1 | 1 | 458.2972  |
| 615675 | 25 | 22 | 6.1  | 927  | 1 | 1 | 1 | 518.2953  |
| 615675 | 25 | 22 | 6.1  | 1778 | 1 | 1 | 1 | 625.3521  |
| 615675 | 25 | 22 | 6.1  | 1833 | 1 | 1 | 1 | 632.8313  |
| 615675 | 25 | 22 | 6.1  | 2410 | 1 | 1 | 1 | 710.8933  |
| 615675 | 25 | 22 | 6.1  | 2470 | 1 | 1 | 1 | 720.8813  |
| 615675 | 25 | 22 | 6.1  | 2568 | 1 | 1 | 1 | 739.8438  |
| 615675 | 25 | 22 | 6.1  | 2754 | 1 | 1 | 1 | 771.4265  |
| 615675 | 25 | 22 | 6.1  | 2932 | 1 | 1 | 1 | 810.4535  |
| 615675 | 25 | 22 | 6.1  | 3179 | 1 | 1 | 1 | 854.4695  |
| 615675 | 25 | 22 | 6.1  | 3230 | 1 | 1 | 1 | 864.9768  |
| 615675 | 25 | 22 | 6.1  | 3710 | 1 | 1 | 1 | 943.5537  |
| 615675 | 25 | 22 | 6.1  | 3841 | 1 | 1 | 1 | 643.9946  |
| 615675 | 25 | 22 | 6.1  | 4079 | 1 | 1 | 1 | 1015.5493 |
| 615675 | 25 | 22 | 6.1  | 4144 | 1 | 1 | 1 | 1027.5086 |
| 615675 | 25 | 22 | 6.1  | 4174 | 1 | 1 | 1 | 689.7021  |
| 615675 | 25 | 22 | 6.1  | 4229 | 1 | 1 | 1 | 1047.0504 |
| 615675 | 25 | 22 | 6.1  | 4263 | 1 | 1 | 1 | 1055.5943 |
| 615675 | 25 | 22 | 6.1  | 4411 | 1 | 1 | 1 | 1083.0258 |
| 615675 | 25 | 22 | 6.1  | 4488 | 1 | 1 | 1 | 1100.0373 |
| 615675 | 25 | 22 | 6.1  | 5175 | 1 | 1 | 1 | 844.4467  |
| 71559  | 24 | 20 | 47   | 1686 | 1 | 1 | 1 | 613.7985  |
| 71559  | 24 | 20 | 47   | 1696 | 1 | 0 | 0 | 614.817   |
| 71559  | 24 | 20 | 47   | 1709 | 1 | 0 | 0 | 616.3265  |
| 71559  | 24 | 20 | 47   | 1960 | 1 | 0 | 0 | 647.8159  |

|        |    |    |      |      |   |   |   |           |
|--------|----|----|------|------|---|---|---|-----------|
| 71559  | 24 | 20 | 47   | 1965 | 1 | 1 | 1 | 648.3353  |
| 71559  | 24 | 20 | 47   | 2015 | 1 | 1 | 1 | 654.8559  |
| 71559  | 24 | 20 | 47   | 2232 | 1 | 0 | 0 | 687.8081  |
| 71559  | 24 | 20 | 47   | 2279 | 1 | 0 | 0 | 693.8682  |
| 71559  | 24 | 20 | 47   | 2368 | 1 | 1 | 1 | 704.3851  |
| 71559  | 24 | 20 | 47   | 2443 | 1 | 1 | 1 | 716.376   |
| 71559  | 24 | 20 | 47   | 2551 | 1 | 0 | 0 | 737.3461  |
| 71559  | 24 | 20 | 47   | 2696 | 1 | 1 | 1 | 761.9042  |
| 71559  | 24 | 20 | 47   | 3058 | 1 | 0 | 0 | 838.3683  |
| 71559  | 24 | 20 | 47   | 3065 | 1 | 1 | 1 | 839.4159  |
| 71559  | 24 | 20 | 47   | 3086 | 1 | 0 | 0 | 840.9196  |
| 71559  | 24 | 20 | 47   | 5214 | 1 | 0 | 0 | 1287.6359 |
| 71559  | 24 | 20 | 47   | 5236 | 1 | 0 | 0 | 863.4107  |
| 71559  | 24 | 20 | 47   | 5287 | 1 | 0 | 0 | 1329.6356 |
| 71559  | 24 | 20 | 47   | 5830 | 1 | 1 | 1 | 1022.5838 |
| 71559  | 24 | 20 | 47   | 5969 | 1 | 1 | 1 | 1065.8271 |
| 51237  | 24 | 16 | 44.8 | 803  | 1 | 1 | 1 | 502.7454  |
| 51237  | 24 | 16 | 44.8 | 1016 | 1 | 0 | 0 | 530.2681  |
| 51237  | 24 | 16 | 44.8 | 1088 | 1 | 0 | 0 | 359.8492  |
| 51237  | 24 | 16 | 44.8 | 1327 | 1 | 0 | 0 | 570.3503  |
| 51237  | 24 | 16 | 44.8 | 1355 | 1 | 0 | 0 | 573.7986  |
| 51237  | 24 | 16 | 44.8 | 1645 | 1 | 0 | 0 | 608.2958  |
| 51237  | 24 | 16 | 44.8 | 1846 | 1 | 0 | 0 | 634.397   |
| 51237  | 24 | 16 | 44.8 | 1952 | 1 | 1 | 1 | 647.3254  |
| 51237  | 24 | 16 | 44.8 | 2401 | 1 | 0 | 0 | 708.8486  |
| 51237  | 24 | 16 | 44.8 | 2442 | 1 | 0 | 0 | 716.3194  |
| 51237  | 24 | 16 | 44.8 | 2532 | 1 | 0 | 0 | 731.8453  |
| 51237  | 24 | 16 | 44.8 | 2977 | 1 | 0 | 0 | 819.927   |
| 51237  | 24 | 16 | 44.8 | 3137 | 1 | 0 | 0 | 848.9192  |
| 51237  | 24 | 16 | 44.8 | 3916 | 1 | 1 | 0 | 979.003   |
| 51237  | 24 | 16 | 44.8 | 5477 | 1 | 0 | 0 | 923.1111  |
| 51237  | 24 | 16 | 44.8 | 5608 | 1 | 1 | 1 | 943.4556  |
| 286993 | 19 | 16 | 10   | 611  | 1 | 1 | 1 | 478.7582  |
| 286993 | 19 | 16 | 10   | 1056 | 1 | 1 | 1 | 536.2754  |
| 286993 | 19 | 16 | 10   | 1611 | 1 | 1 | 1 | 603.4153  |
| 286993 | 19 | 16 | 10   | 2186 | 1 | 1 | 1 | 680.8828  |
| 286993 | 19 | 16 | 10   | 2193 | 1 | 1 | 1 | 681.8761  |
| 286993 | 19 | 16 | 10   | 2491 | 1 | 1 | 1 | 723.4035  |
| 286993 | 19 | 16 | 10   | 2497 | 1 | 1 | 1 | 724.903   |
| 286993 | 19 | 16 | 10   | 2868 | 1 | 1 | 1 | 798.4789  |
| 286993 | 19 | 16 | 10   | 3313 | 1 | 1 | 1 | 881.4819  |
| 286993 | 19 | 16 | 10   | 4131 | 1 | 1 | 1 | 1025.0565 |
| 286993 | 19 | 16 | 10   | 4242 | 1 | 1 | 1 | 1049.598  |
| 286993 | 19 | 16 | 10   | 4479 | 1 | 1 | 1 | 1097.62   |
| 286993 | 19 | 16 | 10   | 4658 | 1 | 1 | 1 | 746.7787  |
| 286993 | 19 | 16 | 10   | 4666 | 1 | 1 | 1 | 1120.5908 |
| 286993 | 19 | 16 | 10   | 5190 | 1 | 1 | 1 | 1278.681  |
| 286993 | 19 | 16 | 10   | 5916 | 1 | 1 | 1 | 785.9418  |
| 50755  | 22 | 13 | 35.6 | 1016 | 1 | 0 | 0 | 530.2681  |
| 50755  | 22 | 13 | 35.6 | 1088 | 1 | 0 | 0 | 359.8492  |
| 50755  | 22 | 13 | 35.6 | 1327 | 1 | 0 | 0 | 570.3503  |
| 50755  | 22 | 13 | 35.6 | 1355 | 1 | 0 | 0 | 573.7986  |
| 50755  | 22 | 13 | 35.6 | 1645 | 1 | 0 | 0 | 608.2958  |
| 50755  | 22 | 13 | 35.6 | 1846 | 1 | 0 | 0 | 634.397   |
| 50755  | 22 | 13 | 35.6 | 2252 | 1 | 1 | 1 | 690.824   |
| 50755  | 22 | 13 | 35.6 | 2401 | 1 | 0 | 0 | 708.8486  |
| 50755  | 22 | 13 | 35.6 | 2977 | 1 | 0 | 0 | 819.927   |
| 50755  | 22 | 13 | 35.6 | 3080 | 1 | 0 | 0 | 840.4014  |

|        |    |    |      |      |   |   |   |           |
|--------|----|----|------|------|---|---|---|-----------|
| 50755  | 22 | 13 | 35.6 | 3137 | 1 | 0 | 0 | 848.9192  |
| 50755  | 22 | 13 | 35.6 | 3916 | 1 | 0 | 0 | 979.003   |
| 50755  | 22 | 13 | 35.6 | 5591 | 1 | 0 | 0 | 938.783   |
| 136636 | 23 | 19 | 23.5 | 283  | 1 | 1 | 1 | 424.7529  |
| 136636 | 23 | 19 | 23.5 | 592  | 1 | 1 | 1 | 476.2483  |
| 136636 | 23 | 19 | 23.5 | 681  | 1 | 1 | 1 | 486.7717  |
| 136636 | 23 | 19 | 23.5 | 743  | 1 | 1 | 1 | 494.7841  |
| 136636 | 23 | 19 | 23.5 | 1102 | 1 | 1 | 1 | 541.3526  |
| 136636 | 23 | 19 | 23.5 | 1384 | 1 | 1 | 1 | 576.8039  |
| 136636 | 23 | 19 | 23.5 | 1853 | 1 | 1 | 1 | 635.3615  |
| 136636 | 23 | 19 | 23.5 | 1949 | 1 | 1 | 1 | 646.826   |
| 136636 | 23 | 19 | 23.5 | 2542 | 1 | 1 | 1 | 734.8949  |
| 136636 | 23 | 19 | 23.5 | 2580 | 1 | 1 | 1 | 742.3844  |
| 136636 | 23 | 19 | 23.5 | 2814 | 1 | 1 | 1 | 784.9199  |
| 136636 | 23 | 19 | 23.5 | 3832 | 1 | 1 | 1 | 643.0317  |
| 136636 | 23 | 19 | 23.5 | 3893 | 1 | 1 | 1 | 650.0237  |
| 136636 | 23 | 19 | 23.5 | 3942 | 1 | 1 | 1 | 983.014   |
| 136636 | 23 | 19 | 23.5 | 4043 | 1 | 1 | 1 | 1004.0656 |
| 136636 | 23 | 19 | 23.5 | 4671 | 1 | 1 | 1 | 1121.12   |
| 136636 | 23 | 19 | 23.5 | 5141 | 1 | 1 | 1 | 834.452   |
| 136636 | 23 | 19 | 23.5 | 5290 | 1 | 1 | 1 | 887.4531  |
| 136636 | 23 | 19 | 23.5 | 6125 | 1 | 1 | 1 | 1113.2388 |
| 51883  | 20 | 14 | 45.6 | 1162 | 1 | 1 | 1 | 548.326   |
| 51883  | 20 | 14 | 45.6 | 1286 | 1 | 1 | 1 | 565.3266  |
| 51883  | 20 | 14 | 45.6 | 1404 | 1 | 1 | 1 | 579.3291  |
| 51883  | 20 | 14 | 45.6 | 2289 | 1 | 1 | 1 | 695.3397  |
| 51883  | 20 | 14 | 45.6 | 3091 | 1 | 1 | 1 | 841.4777  |
| 51883  | 20 | 14 | 45.6 | 3337 | 1 | 1 | 0 | 590.2668  |
| 51883  | 20 | 14 | 45.6 | 3464 | 1 | 1 | 1 | 905.9432  |
| 51883  | 20 | 14 | 45.6 | 3516 | 1 | 1 | 1 | 610.3261  |
| 51883  | 20 | 14 | 45.6 | 3778 | 1 | 1 | 1 | 954.029   |
| 51883  | 20 | 14 | 45.6 | 4173 | 1 | 1 | 1 | 1034.0075 |
| 51883  | 20 | 14 | 45.6 | 4272 | 1 | 1 | 1 | 1057.5285 |
| 51883  | 20 | 14 | 45.6 | 4320 | 1 | 1 | 1 | 1068.0727 |
| 51883  | 20 | 14 | 45.6 | 5220 | 1 | 1 | 1 | 860.4335  |
| 51883  | 20 | 14 | 45.6 | 6254 | 1 | 1 | 1 | 1145.9186 |
| 50250  | 24 | 16 | 49.8 | 433  | 1 | 0 | 0 | 452.2174  |
| 50250  | 24 | 16 | 49.8 | 736  | 1 | 0 | 0 | 494.2774  |
| 50250  | 24 | 16 | 49.8 | 1296 | 1 | 0 | 0 | 566.7869  |
| 50250  | 24 | 16 | 49.8 | 1916 | 1 | 0 | 0 | 642.2554  |
| 50250  | 24 | 16 | 49.8 | 2316 | 1 | 0 | 0 | 698.8502  |
| 50250  | 24 | 16 | 49.8 | 2322 | 1 | 0 | 0 | 466.2575  |
| 50250  | 24 | 16 | 49.8 | 2721 | 1 | 1 | 1 | 766.4559  |
| 50250  | 24 | 16 | 49.8 | 2845 | 1 | 1 | 1 | 792.8793  |
| 50250  | 24 | 16 | 49.8 | 3122 | 1 | 1 | 1 | 846.4381  |
| 50250  | 24 | 16 | 49.8 | 3153 | 1 | 0 | 0 | 851.4556  |
| 50250  | 24 | 16 | 49.8 | 3283 | 1 | 1 | 1 | 875.9642  |
| 50250  | 24 | 16 | 49.8 | 3707 | 1 | 0 | 0 | 943.4762  |
| 50250  | 24 | 16 | 49.8 | 4934 | 1 | 0 | 0 | 1173.5076 |
| 50250  | 24 | 16 | 49.8 | 5000 | 1 | 0 | 0 | 795.7362  |
| 50250  | 24 | 16 | 49.8 | 5050 | 1 | 0 | 0 | 1205.1053 |
| 50250  | 24 | 16 | 49.8 | 6089 | 1 | 0 | 0 | 1107.9135 |
| 98766  | 22 | 17 | 28.7 | 937  | 1 | 1 | 0 | 519.2693  |
| 98766  | 22 | 17 | 28.7 | 1395 | 1 | 1 | 1 | 578.7742  |
| 98766  | 22 | 17 | 28.7 | 1800 | 1 | 1 | 0 | 628.3411  |
| 98766  | 22 | 17 | 28.7 | 1843 | 1 | 1 | 1 | 634.3083  |
| 98766  | 22 | 17 | 28.7 | 1881 | 1 | 1 | 0 | 639.3143  |
| 98766  | 22 | 17 | 28.7 | 2110 | 1 | 1 | 1 | 668.8406  |

|       |    |    |      |      |   |   |   |           |
|-------|----|----|------|------|---|---|---|-----------|
| 98766 | 22 | 17 | 28.7 | 2352 | 1 | 1 | 0 | 702.4366  |
| 98766 | 22 | 17 | 28.7 | 2659 | 1 | 1 | 1 | 503.5729  |
| 98766 | 22 | 17 | 28.7 | 2805 | 1 | 1 | 0 | 783.4575  |
| 98766 | 22 | 17 | 28.7 | 3193 | 1 | 1 | 1 | 858.5209  |
| 98766 | 22 | 17 | 28.7 | 3965 | 1 | 1 | 1 | 659.019   |
| 98766 | 22 | 17 | 28.7 | 4147 | 1 | 1 | 1 | 1027.5264 |
| 98766 | 22 | 17 | 28.7 | 4269 | 1 | 1 | 1 | 1056.5295 |
| 98766 | 22 | 17 | 28.7 | 5093 | 1 | 1 | 1 | 815.4729  |
| 98766 | 22 | 17 | 28.7 | 5109 | 1 | 1 | 1 | 822.7196  |
| 98766 | 22 | 17 | 28.7 | 5313 | 1 | 1 | 1 | 893.0995  |
| 98766 | 22 | 17 | 28.7 | 5775 | 1 | 1 | 1 | 998.1536  |
| 37004 | 17 | 12 | 55.3 | 240  | 1 | 1 | 1 | 417.2355  |
| 37004 | 17 | 12 | 55.3 | 943  | 1 | 1 | 1 | 519.7767  |
| 37004 | 17 | 12 | 55.3 | 1333 | 1 | 1 | 1 | 570.8258  |
| 37004 | 17 | 12 | 55.3 | 2451 | 1 | 1 | 1 | 717.8827  |
| 37004 | 17 | 12 | 55.3 | 2613 | 1 | 1 | 1 | 749.927   |
| 37004 | 17 | 12 | 55.3 | 3063 | 1 | 1 | 1 | 559.6626  |
| 37004 | 17 | 12 | 55.3 | 3280 | 1 | 1 | 1 | 875.9087  |
| 37004 | 17 | 12 | 55.3 | 3308 | 1 | 1 | 1 | 881.3974  |
| 37004 | 17 | 12 | 55.3 | 4083 | 1 | 1 | 1 | 1017.0393 |
| 37004 | 17 | 12 | 55.3 | 4424 | 1 | 1 | 1 | 1086.5073 |
| 37004 | 17 | 12 | 55.3 | 4702 | 1 | 1 | 1 | 1125.54   |
| 37004 | 17 | 12 | 55.3 | 5705 | 1 | 1 | 1 | 975.1256  |
| 49813 | 22 | 13 | 38.1 | 110  | 1 | 1 | 1 | 390.7101  |
| 49813 | 22 | 13 | 38.1 | 468  | 1 | 1 | 1 | 457.7869  |
| 49813 | 22 | 13 | 38.1 | 887  | 1 | 1 | 1 | 513.3081  |
| 49813 | 22 | 13 | 38.1 | 888  | 1 | 1 | 1 | 513.748   |
| 49813 | 22 | 13 | 38.1 | 1250 | 1 | 1 | 1 | 560.8029  |
| 49813 | 22 | 13 | 38.1 | 1976 | 1 | 1 | 1 | 649.8771  |
| 49813 | 22 | 13 | 38.1 | 2506 | 1 | 1 | 1 | 726.3399  |
| 49813 | 22 | 13 | 38.1 | 2969 | 1 | 1 | 1 | 545.6382  |
| 49813 | 22 | 13 | 38.1 | 2974 | 1 | 1 | 1 | 819.4408  |
| 49813 | 22 | 13 | 38.1 | 3317 | 1 | 1 | 1 | 882.4651  |
| 49813 | 22 | 13 | 38.1 | 4887 | 1 | 1 | 1 | 771.3808  |
| 49813 | 22 | 13 | 38.1 | 5148 | 1 | 1 | 1 | 836.114   |
| 49813 | 22 | 13 | 38.1 | 5756 | 1 | 1 | 1 | 1487.211  |
| 47083 | 18 | 14 | 41.5 | 535  | 1 | 0 | 0 | 468.263   |
| 47083 | 18 | 14 | 41.5 | 620  | 1 | 0 | 0 | 479.7637  |
| 47083 | 18 | 14 | 41.5 | 804  | 1 | 0 | 0 | 502.7745  |
| 47083 | 18 | 14 | 41.5 | 861  | 1 | 0 | 0 | 509.2767  |
| 47083 | 18 | 14 | 41.5 | 979  | 1 | 0 | 0 | 524.2611  |
| 47083 | 18 | 14 | 41.5 | 1231 | 1 | 0 | 0 | 557.8451  |
| 47083 | 18 | 14 | 41.5 | 1479 | 1 | 0 | 0 | 587.3273  |
| 47083 | 18 | 14 | 41.5 | 2340 | 1 | 0 | 0 | 701.3696  |
| 47083 | 18 | 14 | 41.5 | 2853 | 1 | 0 | 0 | 794.3544  |
| 47083 | 18 | 14 | 41.5 | 3513 | 1 | 0 | 0 | 914.4722  |
| 47083 | 18 | 14 | 41.5 | 3814 | 1 | 0 | 0 | 961.0053  |
| 47083 | 18 | 14 | 41.5 | 4165 | 1 | 1 | 1 | 1031.0369 |
| 47083 | 18 | 14 | 41.5 | 5347 | 1 | 0 | 0 | 1350.2014 |
| 47083 | 18 | 14 | 41.5 | 5675 | 1 | 0 | 0 | 1448.2541 |
| 47735 | 19 | 16 | 59.9 | 93   | 1 | 1 | 1 | 383.7504  |
| 47735 | 19 | 16 | 59.9 | 327  | 1 | 1 | 0 | 433.764   |
| 47735 | 19 | 16 | 59.9 | 1288 | 1 | 1 | 0 | 565.797   |
| 47735 | 19 | 16 | 59.9 | 1410 | 1 | 1 | 0 | 579.8293  |
| 47735 | 19 | 16 | 59.9 | 1567 | 1 | 1 | 0 | 598.2831  |
| 47735 | 19 | 16 | 59.9 | 1964 | 1 | 1 | 0 | 648.3248  |
| 47735 | 19 | 16 | 59.9 | 1999 | 1 | 1 | 0 | 653.3361  |
| 47735 | 19 | 16 | 59.9 | 2988 | 1 | 1 | 0 | 822.9419  |

|       |    |    |      |      |   |   |   |           |
|-------|----|----|------|------|---|---|---|-----------|
| 47735 | 19 | 16 | 59.9 | 3625 | 1 | 1 | 0 | 622.3452  |
| 47735 | 19 | 16 | 59.9 | 3711 | 1 | 1 | 0 | 943.9539  |
| 47735 | 19 | 16 | 59.9 | 3983 | 1 | 1 | 1 | 992.4695  |
| 47735 | 19 | 16 | 59.9 | 4082 | 1 | 1 | 1 | 678.3586  |
| 47735 | 19 | 16 | 59.9 | 4726 | 1 | 1 | 0 | 753.0273  |
| 47735 | 19 | 16 | 59.9 | 4768 | 1 | 1 | 0 | 757.01    |
| 47735 | 19 | 16 | 59.9 | 5387 | 1 | 1 | 1 | 907.5128  |
| 47735 | 19 | 16 | 59.9 | 6379 | 1 | 1 | 1 | 1277.9342 |
| 71456 | 17 | 14 | 31.7 | 1696 | 1 | 0 | 0 | 614.817   |
| 71456 | 17 | 14 | 31.7 | 1960 | 1 | 0 | 0 | 647.8159  |
| 71456 | 17 | 14 | 31.7 | 2082 | 1 | 0 | 0 | 665.3104  |
| 71456 | 17 | 14 | 31.7 | 2232 | 1 | 0 | 0 | 687.8081  |
| 71456 | 17 | 14 | 31.7 | 2460 | 1 | 0 | 0 | 718.88    |
| 71456 | 17 | 14 | 31.7 | 2551 | 1 | 0 | 0 | 737.3461  |
| 71456 | 17 | 14 | 31.7 | 2790 | 1 | 0 | 0 | 519.589   |
| 71456 | 17 | 14 | 31.7 | 3040 | 1 | 1 | 1 | 833.3978  |
| 71456 | 17 | 14 | 31.7 | 3058 | 1 | 0 | 0 | 838.3683  |
| 71456 | 17 | 14 | 31.7 | 3086 | 1 | 0 | 0 | 840.9196  |
| 71456 | 17 | 14 | 31.7 | 5214 | 1 | 0 | 0 | 1287.6359 |
| 71456 | 17 | 14 | 31.7 | 5236 | 1 | 0 | 0 | 863.4107  |
| 71741 | 15 | 12 | 27.1 | 1577 | 1 | 1 | 1 | 599.3507  |
| 71741 | 15 | 12 | 27.1 | 1696 | 1 | 0 | 0 | 614.817   |
| 71741 | 15 | 12 | 27.1 | 1900 | 1 | 1 | 1 | 639.8507  |
| 71741 | 15 | 12 | 27.1 | 1960 | 1 | 0 | 0 | 647.8159  |
| 71741 | 15 | 12 | 27.1 | 2232 | 1 | 0 | 0 | 687.8081  |
| 71741 | 15 | 12 | 27.1 | 2460 | 1 | 0 | 0 | 718.88    |
| 71741 | 15 | 12 | 27.1 | 2551 | 1 | 0 | 0 | 737.3461  |
| 71741 | 15 | 12 | 27.1 | 3030 | 1 | 0 | 0 | 832.4088  |
| 71741 | 15 | 12 | 27.1 | 3058 | 1 | 0 | 0 | 838.3683  |
| 71741 | 15 | 12 | 27.1 | 3086 | 1 | 0 | 0 | 840.9196  |
| 71741 | 15 | 12 | 27.1 | 5214 | 1 | 0 | 0 | 1287.6359 |
| 71741 | 15 | 12 | 27.1 | 5236 | 1 | 0 | 0 | 863.4107  |
| 41112 | 14 | 11 | 36.4 | 142  | 1 | 1 | 1 | 397.2265  |
| 41112 | 14 | 11 | 36.4 | 188  | 1 | 1 | 0 | 408.7505  |
| 41112 | 14 | 11 | 36.4 | 1486 | 1 | 1 | 0 | 587.8105  |
| 41112 | 14 | 11 | 36.4 | 1674 | 1 | 1 | 0 | 611.8189  |
| 41112 | 14 | 11 | 36.4 | 2571 | 1 | 1 | 0 | 740.3928  |
| 41112 | 14 | 11 | 36.4 | 2673 | 1 | 1 | 1 | 758.3623  |
| 41112 | 14 | 11 | 36.4 | 3092 | 1 | 1 | 1 | 841.9206  |
| 41112 | 14 | 11 | 36.4 | 3520 | 1 | 1 | 1 | 915.5025  |
| 41112 | 14 | 11 | 36.4 | 3570 | 1 | 1 | 1 | 923.9315  |
| 41112 | 14 | 11 | 36.4 | 4393 | 1 | 1 | 0 | 719.6976  |
| 41112 | 14 | 11 | 36.4 | 4547 | 1 | 1 | 1 | 1107.0611 |
| 41563 | 13 | 10 | 33.6 | 94   | 1 | 1 | 1 | 384.2007  |
| 41563 | 13 | 10 | 33.6 | 98   | 1 | 1 | 0 | 386.2273  |
| 41563 | 13 | 10 | 33.6 | 482  | 1 | 1 | 0 | 459.2948  |
| 41563 | 13 | 10 | 33.6 | 1619 | 1 | 1 | 1 | 604.3192  |
| 41563 | 13 | 10 | 33.6 | 1633 | 1 | 1 | 1 | 606.3072  |
| 41563 | 13 | 10 | 33.6 | 2185 | 1 | 1 | 0 | 680.8596  |
| 41563 | 13 | 10 | 33.6 | 2371 | 1 | 1 | 1 | 470.2451  |
| 41563 | 13 | 10 | 33.6 | 2492 | 1 | 1 | 0 | 723.8742  |
| 41563 | 13 | 10 | 33.6 | 4126 | 1 | 1 | 1 | 1024.5135 |
| 41563 | 13 | 10 | 33.6 | 5473 | 1 | 1 | 0 | 1382.6892 |
| 41834 | 14 | 13 | 40   | 98   | 1 | 0 | 0 | 386.2273  |
| 41834 | 14 | 13 | 40   | 482  | 1 | 0 | 0 | 459.2948  |
| 41834 | 14 | 13 | 40   | 591  | 1 | 1 | 1 | 476.2482  |
| 41834 | 14 | 13 | 40   | 908  | 1 | 1 | 1 | 516.7596  |
| 41834 | 14 | 13 | 40   | 1510 | 1 | 1 | 1 | 591.811   |

|        |    |    |      |      |   |   |   |           |
|--------|----|----|------|------|---|---|---|-----------|
| 41834  | 14 | 13 | 40   | 1551 | 1 | 1 | 0 | 596.3212  |
| 41834  | 14 | 13 | 40   | 1694 | 1 | 1 | 1 | 614.8137  |
| 41834  | 14 | 13 | 40   | 2185 | 1 | 0 | 1 | 680.8596  |
| 41834  | 14 | 13 | 40   | 2344 | 1 | 1 | 1 | 701.8748  |
| 41834  | 14 | 13 | 40   | 2492 | 1 | 0 | 0 | 723.8742  |
| 41834  | 14 | 13 | 40   | 2543 | 1 | 1 | 1 | 735.3817  |
| 41834  | 14 | 13 | 40   | 4139 | 1 | 1 | 1 | 1025.9984 |
| 41834  | 14 | 13 | 40   | 5473 | 1 | 0 | 0 | 1382.6892 |
| 41937  | 16 | 13 | 54.9 | 158  | 1 | 1 | 0 | 400.7718  |
| 41937  | 16 | 13 | 54.9 | 698  | 1 | 1 | 0 | 488.7276  |
| 41937  | 16 | 13 | 54.9 | 1436 | 1 | 1 | 0 | 582.3023  |
| 41937  | 16 | 13 | 54.9 | 1555 | 1 | 1 | 0 | 596.7684  |
| 41937  | 16 | 13 | 54.9 | 2557 | 1 | 1 | 1 | 738.3413  |
| 41937  | 16 | 13 | 54.9 | 2675 | 1 | 1 | 0 | 758.3777  |
| 41937  | 16 | 13 | 54.9 | 3355 | 1 | 1 | 0 | 887.9518  |
| 41937  | 16 | 13 | 54.9 | 3596 | 1 | 1 | 1 | 928.469   |
| 41937  | 16 | 13 | 54.9 | 3895 | 1 | 1 | 0 | 974.94    |
| 41937  | 16 | 13 | 54.9 | 3910 | 1 | 1 | 0 | 977.5349  |
| 41937  | 16 | 13 | 54.9 | 4489 | 1 | 1 | 1 | 1100.0404 |
| 41937  | 16 | 13 | 54.9 | 5927 | 1 | 1 | 0 | 1051.2186 |
| 41937  | 16 | 13 | 54.9 | 5965 | 1 | 1 | 1 | 1065.5103 |
| 31671  | 15 | 10 | 44.8 | 307  | 1 | 1 | 0 | 429.2456  |
| 31671  | 15 | 10 | 44.8 | 348  | 1 | 1 | 0 | 436.2541  |
| 31671  | 15 | 10 | 44.8 | 720  | 1 | 1 | 1 | 492.2524  |
| 31671  | 15 | 10 | 44.8 | 1568 | 1 | 1 | 1 | 598.2951  |
| 31671  | 15 | 10 | 44.8 | 2028 | 1 | 1 | 1 | 657.3207  |
| 31671  | 15 | 10 | 44.8 | 2465 | 1 | 1 | 1 | 719.3836  |
| 31671  | 15 | 10 | 44.8 | 2537 | 1 | 1 | 1 | 733.3932  |
| 31671  | 15 | 10 | 44.8 | 2900 | 1 | 1 | 1 | 805.4065  |
| 31671  | 15 | 10 | 44.8 | 3803 | 1 | 1 | 1 | 959.4702  |
| 31671  | 15 | 10 | 44.8 | 5494 | 1 | 1 | 1 | 694.104   |
| 36185  | 16 | 13 | 49.5 | 562  | 1 | 1 | 1 | 472.2581  |
| 36185  | 16 | 13 | 49.5 | 1053 | 1 | 1 | 1 | 535.8266  |
| 36185  | 16 | 13 | 49.5 | 1772 | 1 | 1 | 1 | 416.9029  |
| 36185  | 16 | 13 | 49.5 | 1981 | 1 | 1 | 1 | 650.8484  |
| 36185  | 16 | 13 | 49.5 | 1996 | 1 | 1 | 1 | 652.3788  |
| 36185  | 16 | 13 | 49.5 | 2019 | 1 | 1 | 1 | 655.8137  |
| 36185  | 16 | 13 | 49.5 | 2253 | 1 | 1 | 1 | 690.8266  |
| 36185  | 16 | 13 | 49.5 | 2608 | 1 | 1 | 1 | 747.8806  |
| 36185  | 16 | 13 | 49.5 | 2672 | 1 | 1 | 1 | 505.2835  |
| 36185  | 16 | 13 | 49.5 | 2742 | 1 | 1 | 1 | 512.6553  |
| 36185  | 16 | 13 | 49.5 | 3342 | 1 | 1 | 1 | 885.4294  |
| 36185  | 16 | 13 | 49.5 | 4371 | 1 | 1 | 1 | 717.7313  |
| 36185  | 16 | 13 | 49.5 | 4905 | 1 | 1 | 1 | 1161.1086 |
| 105902 | 19 | 18 | 27.2 | 151  | 1 | 1 | 1 | 399.764   |
| 105902 | 19 | 18 | 27.2 | 682  | 1 | 1 | 1 | 486.7772  |
| 105902 | 19 | 18 | 27.2 | 901  | 1 | 1 | 0 | 515.2877  |
| 105902 | 19 | 18 | 27.2 | 941  | 1 | 1 | 0 | 519.7677  |
| 105902 | 19 | 18 | 27.2 | 993  | 1 | 1 | 1 | 525.7702  |
| 105902 | 19 | 18 | 27.2 | 1237 | 1 | 1 | 0 | 558.7982  |
| 105902 | 19 | 18 | 27.2 | 1409 | 1 | 1 | 0 | 579.8216  |
| 105902 | 19 | 18 | 27.2 | 1413 | 1 | 1 | 0 | 580.3004  |
| 105902 | 19 | 18 | 27.2 | 2265 | 1 | 1 | 0 | 691.8853  |
| 105902 | 19 | 18 | 27.2 | 2324 | 1 | 1 | 0 | 699.3723  |
| 105902 | 19 | 18 | 27.2 | 2565 | 1 | 1 | 0 | 738.8949  |
| 105902 | 19 | 18 | 27.2 | 2666 | 1 | 1 | 0 | 756.8654  |
| 105902 | 19 | 18 | 27.2 | 3733 | 1 | 1 | 1 | 946.5266  |
| 105902 | 19 | 18 | 27.2 | 3923 | 1 | 1 | 0 | 653.6862  |

|        |    |    |      |      |   |   |   |           |
|--------|----|----|------|------|---|---|---|-----------|
| 105902 | 19 | 18 | 27.2 | 3986 | 1 | 1 | 0 | 993.482   |
| 105902 | 19 | 18 | 27.2 | 4087 | 1 | 1 | 0 | 678.3803  |
| 105902 | 19 | 18 | 27.2 | 5150 | 1 | 1 | 0 | 836.799   |
| 105902 | 19 | 18 | 27.2 | 6370 | 1 | 1 | 0 | 954.7689  |
| 47236  | 16 | 13 | 48   | 327  | 1 | 0 | 0 | 433.764   |
| 47236  | 16 | 13 | 48   | 1288 | 1 | 0 | 0 | 565.797   |
| 47236  | 16 | 13 | 48   | 1410 | 1 | 0 | 0 | 579.8293  |
| 47236  | 16 | 13 | 48   | 1567 | 1 | 0 | 0 | 598.2831  |
| 47236  | 16 | 13 | 48   | 1964 | 1 | 0 | 0 | 648.3248  |
| 47236  | 16 | 13 | 48   | 1999 | 1 | 0 | 0 | 653.3361  |
| 47236  | 16 | 13 | 48   | 2988 | 1 | 0 | 0 | 822.9419  |
| 47236  | 16 | 13 | 48   | 3625 | 1 | 0 | 0 | 622.3452  |
| 47236  | 16 | 13 | 48   | 3711 | 1 | 0 | 0 | 943.9539  |
| 47236  | 16 | 13 | 48   | 3983 | 1 | 0 | 1 | 992.4695  |
| 47236  | 16 | 13 | 48   | 4726 | 1 | 0 | 0 | 753.0273  |
| 47236  | 16 | 13 | 48   | 4768 | 1 | 0 | 0 | 757.01    |
| 47236  | 16 | 13 | 48   | 6380 | 1 | 1 | 1 | 1278.2726 |
| 65547  | 17 | 14 | 30.5 | 143  | 1 | 1 | 1 | 397.2324  |
| 65547  | 17 | 14 | 30.5 | 1289 | 1 | 1 | 1 | 566.239   |
| 65547  | 17 | 14 | 30.5 | 1412 | 1 | 1 | 0 | 580.2546  |
| 65547  | 17 | 14 | 30.5 | 1538 | 1 | 1 | 0 | 594.3551  |
| 65547  | 17 | 14 | 30.5 | 1642 | 1 | 1 | 1 | 607.7773  |
| 65547  | 17 | 14 | 30.5 | 1822 | 1 | 1 | 1 | 631.3422  |
| 65547  | 17 | 14 | 30.5 | 2616 | 1 | 1 | 1 | 750.8459  |
| 65547  | 17 | 14 | 30.5 | 2875 | 1 | 1 | 1 | 533.614   |
| 65547  | 17 | 14 | 30.5 | 3210 | 1 | 1 | 0 | 860.8774  |
| 65547  | 17 | 14 | 30.5 | 3479 | 1 | 1 | 1 | 908.4598  |
| 65547  | 17 | 14 | 30.5 | 3726 | 1 | 1 | 1 | 945.9748  |
| 65547  | 17 | 14 | 30.5 | 5054 | 1 | 1 | 0 | 1205.571  |
| 65547  | 17 | 14 | 30.5 | 5076 | 1 | 1 | 1 | 1214.6242 |
| 65547  | 17 | 14 | 30.5 | 5231 | 1 | 1 | 1 | 862.1197  |
| 196643 | 13 | 11 | 9.1  | 241  | 1 | 1 | 1 | 417.2477  |
| 196643 | 13 | 11 | 9.1  | 815  | 1 | 1 | 1 | 503.7807  |
| 196643 | 13 | 11 | 9.1  | 1055 | 1 | 1 | 1 | 536.2681  |
| 196643 | 13 | 11 | 9.1  | 1183 | 1 | 1 | 1 | 551.8034  |
| 196643 | 13 | 11 | 9.1  | 1911 | 1 | 1 | 1 | 640.9     |
| 196643 | 13 | 11 | 9.1  | 2042 | 1 | 1 | 1 | 659.3615  |
| 196643 | 13 | 11 | 9.1  | 2447 | 1 | 1 | 1 | 717.3645  |
| 196643 | 13 | 11 | 9.1  | 3166 | 1 | 1 | 1 | 853.4322  |
| 196643 | 13 | 11 | 9.1  | 4923 | 1 | 1 | 1 | 1169.083  |
| 196643 | 13 | 11 | 9.1  | 5059 | 1 | 1 | 1 | 1206.6101 |
| 196643 | 13 | 11 | 9.1  | 6211 | 1 | 1 | 1 | 1128.177  |
| 52347  | 7  | 6  | 22.8 | 1388 | 1 | 1 | 1 | 576.8605  |
| 52347  | 7  | 6  | 22.8 | 3141 | 1 | 1 | 1 | 849.3845  |
| 52347  | 7  | 6  | 22.8 | 3411 | 1 | 1 | 1 | 898.9054  |
| 52347  | 7  | 6  | 22.8 | 4367 | 1 | 1 | 1 | 1075.5689 |
| 52347  | 7  | 6  | 22.8 | 4936 | 1 | 1 | 1 | 1174.097  |
| 52347  | 7  | 6  | 22.8 | 5600 | 1 | 1 | 1 | 941.8219  |
| 103283 | 13 | 12 | 16.7 | 869  | 1 | 1 | 1 | 510.2588  |
| 103283 | 13 | 12 | 16.7 | 987  | 1 | 1 | 1 | 524.775   |
| 103283 | 13 | 12 | 16.7 | 1535 | 1 | 1 | 1 | 594.3223  |
| 103283 | 13 | 12 | 16.7 | 1886 | 1 | 1 | 1 | 639.3581  |
| 103283 | 13 | 12 | 16.7 | 1917 | 1 | 1 | 1 | 642.3151  |
| 103283 | 13 | 12 | 16.7 | 1995 | 1 | 1 | 1 | 652.3614  |
| 103283 | 13 | 12 | 16.7 | 2423 | 1 | 1 | 1 | 712.8855  |
| 103283 | 13 | 12 | 16.7 | 2484 | 1 | 1 | 1 | 722.3947  |
| 103283 | 13 | 12 | 16.7 | 2534 | 1 | 1 | 1 | 731.8877  |
| 103283 | 13 | 12 | 16.7 | 2989 | 1 | 1 | 1 | 822.9748  |

|        |    |    |      |      |   |   |   |           |
|--------|----|----|------|------|---|---|---|-----------|
| 103283 | 13 | 12 | 16.7 | 3538 | 1 | 1 | 1 | 918.9739  |
| 103283 | 13 | 12 | 16.7 | 5130 | 1 | 1 | 1 | 829.0773  |
| 49487  | 11 | 9  | 31.2 | 685  | 1 | 1 | 1 | 486.79    |
| 49487  | 11 | 9  | 31.2 | 1543 | 1 | 1 | 1 | 595.824   |
| 49487  | 11 | 9  | 31.2 | 1730 | 1 | 1 | 1 | 619.3298  |
| 49487  | 11 | 9  | 31.2 | 1935 | 1 | 1 | 1 | 644.3573  |
| 49487  | 11 | 9  | 31.2 | 3285 | 1 | 1 | 1 | 876.4351  |
| 49487  | 11 | 9  | 31.2 | 4345 | 1 | 1 | 1 | 715.0172  |
| 49487  | 11 | 9  | 31.2 | 4352 | 1 | 1 | 1 | 1073.0568 |
| 49487  | 11 | 9  | 31.2 | 4471 | 1 | 1 | 1 | 1095.5724 |
| 49487  | 11 | 9  | 31.2 | 4512 | 1 | 1 | 1 | 1102.5718 |
| 103616 | 16 | 16 | 25.7 | 901  | 1 | 0 | 0 | 515.2877  |
| 103616 | 16 | 16 | 25.7 | 941  | 1 | 0 | 0 | 519.7677  |
| 103616 | 16 | 16 | 25.7 | 1237 | 1 | 0 | 0 | 558.7982  |
| 103616 | 16 | 16 | 25.7 | 1409 | 1 | 0 | 0 | 579.8216  |
| 103616 | 16 | 16 | 25.7 | 1413 | 1 | 0 | 0 | 580.3004  |
| 103616 | 16 | 16 | 25.7 | 2265 | 1 | 0 | 0 | 691.8853  |
| 103616 | 16 | 16 | 25.7 | 2324 | 1 | 0 | 0 | 699.3723  |
| 103616 | 16 | 16 | 25.7 | 2430 | 1 | 1 | 1 | 713.8337  |
| 103616 | 16 | 16 | 25.7 | 2565 | 1 | 0 | 0 | 738.8949  |
| 103616 | 16 | 16 | 25.7 | 2666 | 1 | 0 | 0 | 756.8654  |
| 103616 | 16 | 16 | 25.7 | 3923 | 1 | 0 | 0 | 653.6862  |
| 103616 | 16 | 16 | 25.7 | 3986 | 1 | 0 | 0 | 993.482   |
| 103616 | 16 | 16 | 25.7 | 4087 | 1 | 0 | 0 | 678.3803  |
| 103616 | 16 | 16 | 25.7 | 5150 | 1 | 0 | 0 | 836.799   |
| 103616 | 16 | 16 | 25.7 | 6370 | 1 | 0 | 0 | 954.7689  |
| 58863  | 14 | 14 | 36.3 | 530  | 1 | 1 | 1 | 467.2378  |
| 58863  | 14 | 14 | 36.3 | 1145 | 1 | 1 | 1 | 546.3029  |
| 58863  | 14 | 14 | 36.3 | 1424 | 1 | 1 | 1 | 581.2935  |
| 58863  | 14 | 14 | 36.3 | 1439 | 1 | 1 | 1 | 582.3243  |
| 58863  | 14 | 14 | 36.3 | 1580 | 1 | 1 | 1 | 600.3242  |
| 58863  | 14 | 14 | 36.3 | 2103 | 1 | 1 | 1 | 667.3625  |
| 58863  | 14 | 14 | 36.3 | 2901 | 1 | 1 | 1 | 805.4427  |
| 58863  | 14 | 14 | 36.3 | 3157 | 1 | 1 | 1 | 851.8718  |
| 58863  | 14 | 14 | 36.3 | 3212 | 1 | 1 | 1 | 860.94    |
| 58863  | 14 | 14 | 36.3 | 3960 | 1 | 1 | 1 | 657.6892  |
| 58863  | 14 | 14 | 36.3 | 4485 | 1 | 1 | 1 | 1099.0574 |
| 58863  | 14 | 14 | 36.3 | 5286 | 1 | 1 | 1 | 886.4545  |
| 58863  | 14 | 14 | 36.3 | 5514 | 1 | 1 | 1 | 928.4688  |
| 58863  | 14 | 14 | 36.3 | 5696 | 1 | 1 | 1 | 971.1671  |
| 73315  | 12 | 11 | 21.6 | 727  | 1 | 1 | 0 | 492.7896  |
| 73315  | 12 | 11 | 21.6 | 1771 | 1 | 1 | 1 | 624.8451  |
| 73315  | 12 | 11 | 21.6 | 1773 | 1 | 1 | 1 | 625.2859  |
| 73315  | 12 | 11 | 21.6 | 1802 | 1 | 1 | 0 | 628.8126  |
| 73315  | 12 | 11 | 21.6 | 1957 | 1 | 1 | 1 | 647.7949  |
| 73315  | 12 | 11 | 21.6 | 2190 | 1 | 1 | 1 | 681.3748  |
| 73315  | 12 | 11 | 21.6 | 2448 | 1 | 1 | 0 | 717.3686  |
| 73315  | 12 | 11 | 21.6 | 2567 | 1 | 1 | 1 | 739.385   |
| 73315  | 12 | 11 | 21.6 | 3470 | 1 | 1 | 1 | 907.4807  |
| 73315  | 12 | 11 | 21.6 | 3498 | 1 | 1 | 1 | 911.9534  |
| 73315  | 12 | 11 | 21.6 | 3555 | 1 | 1 | 1 | 920.4495  |
| 94743  | 13 | 12 | 19.8 | 56   | 1 | 1 | 1 | 372.6948  |
| 94743  | 13 | 12 | 19.8 | 90   | 1 | 1 | 1 | 383.2107  |
| 94743  | 13 | 12 | 19.8 | 442  | 1 | 1 | 1 | 453.7377  |
| 94743  | 13 | 12 | 19.8 | 952  | 1 | 1 | 1 | 520.3343  |
| 94743  | 13 | 12 | 19.8 | 1779 | 1 | 1 | 1 | 625.3661  |
| 94743  | 13 | 12 | 19.8 | 2509 | 1 | 1 | 1 | 726.8488  |
| 94743  | 13 | 12 | 19.8 | 2689 | 1 | 1 | 1 | 759.8401  |

|        |    |    |      |      |   |   |   |           |
|--------|----|----|------|------|---|---|---|-----------|
| 94743  | 13 | 12 | 19.8 | 2809 | 1 | 1 | 1 | 784.3691  |
| 94743  | 13 | 12 | 19.8 | 3427 | 1 | 1 | 1 | 900.4672  |
| 94743  | 13 | 12 | 19.8 | 4727 | 1 | 1 | 1 | 1129.105  |
| 94743  | 13 | 12 | 19.8 | 5029 | 1 | 1 | 1 | 800.3915  |
| 94743  | 13 | 12 | 19.8 | 5717 | 1 | 1 | 1 | 978.1487  |
| 59235  | 8  | 7  | 21.2 | 1789 | 1 | 1 | 1 | 626.8845  |
| 59235  | 8  | 7  | 21.2 | 2213 | 1 | 1 | 0 | 685.3193  |
| 59235  | 8  | 7  | 21.2 | 2774 | 1 | 1 | 1 | 775.4323  |
| 59235  | 8  | 7  | 21.2 | 2916 | 1 | 1 | 0 | 807.9607  |
| 59235  | 8  | 7  | 21.2 | 3045 | 1 | 1 | 0 | 835.4178  |
| 59235  | 8  | 7  | 21.2 | 4044 | 1 | 1 | 1 | 669.7419  |
| 59235  | 8  | 7  | 21.2 | 5831 | 1 | 1 | 1 | 1023.1322 |
| 40001  | 13 | 10 | 33.2 | 1474 | 1 | 1 | 1 | 586.8018  |
| 40001  | 13 | 10 | 33.2 | 1561 | 1 | 1 | 0 | 597.335   |
| 40001  | 13 | 10 | 33.2 | 1653 | 1 | 1 | 0 | 609.306   |
| 40001  | 13 | 10 | 33.2 | 1907 | 1 | 1 | 1 | 640.8188  |
| 40001  | 13 | 10 | 33.2 | 2418 | 1 | 1 | 0 | 712.3355  |
| 40001  | 13 | 10 | 33.2 | 2581 | 1 | 1 | 1 | 742.4144  |
| 40001  | 13 | 10 | 33.2 | 2851 | 1 | 1 | 1 | 793.9411  |
| 40001  | 13 | 10 | 33.2 | 3434 | 1 | 1 | 1 | 902.4697  |
| 40001  | 13 | 10 | 33.2 | 4085 | 1 | 1 | 1 | 678.3626  |
| 40001  | 13 | 10 | 33.2 | 4796 | 1 | 1 | 1 | 1138.5913 |
| 29784  | 8  | 7  | 53.3 | 1749 | 1 | 1 | 1 | 621.8284  |
| 29784  | 8  | 7  | 53.3 | 3857 | 1 | 1 | 1 | 968.0204  |
| 29784  | 8  | 7  | 53.3 | 5079 | 1 | 1 | 1 | 1216.1233 |
| 29784  | 8  | 7  | 53.3 | 5129 | 1 | 1 | 1 | 1242.6153 |
| 29784  | 8  | 7  | 53.3 | 5589 | 1 | 1 | 1 | 938.5068  |
| 29784  | 8  | 7  | 53.3 | 5736 | 1 | 1 | 1 | 982.8298  |
| 29784  | 8  | 7  | 53.3 | 6437 | 1 | 1 | 1 | 1026.2778 |
| 10285  | 8  | 5  | 54.6 | 489  | 1 | 1 | 1 | 460.7468  |
| 10285  | 8  | 5  | 54.6 | 553  | 1 | 1 | 1 | 471.2582  |
| 10285  | 8  | 5  | 54.6 | 2468 | 1 | 1 | 1 | 720.3466  |
| 10285  | 8  | 5  | 54.6 | 2674 | 1 | 1 | 1 | 758.3673  |
| 10285  | 8  | 5  | 54.6 | 4392 | 1 | 1 | 1 | 1078.5152 |
| 120769 | 12 | 11 | 13.8 | 1176 | 1 | 1 | 1 | 550.8374  |
| 120769 | 12 | 11 | 13.8 | 1712 | 1 | 1 | 1 | 617.3159  |
| 120769 | 12 | 11 | 13.8 | 1769 | 1 | 1 | 1 | 624.798   |
| 120769 | 12 | 11 | 13.8 | 1814 | 1 | 1 | 1 | 629.8554  |
| 120769 | 12 | 11 | 13.8 | 1883 | 1 | 1 | 1 | 639.3401  |
| 120769 | 12 | 11 | 13.8 | 1912 | 1 | 1 | 1 | 641.3162  |
| 120769 | 12 | 11 | 13.8 | 2198 | 1 | 1 | 1 | 682.8433  |
| 120769 | 12 | 11 | 13.8 | 2363 | 1 | 1 | 1 | 703.792   |
| 120769 | 12 | 11 | 13.8 | 2788 | 1 | 1 | 1 | 778.4375  |
| 120769 | 12 | 11 | 13.8 | 4509 | 1 | 1 | 1 | 735.0511  |
| 120769 | 12 | 11 | 13.8 | 5133 | 1 | 1 | 1 | 830.4464  |
| 59765  | 13 | 9  | 22.8 | 696  | 1 | 1 | 0 | 488.2844  |
| 59765  | 13 | 9  | 22.8 | 1480 | 1 | 1 | 1 | 587.3348  |
| 59765  | 13 | 9  | 22.8 | 1897 | 1 | 1 | 1 | 639.8215  |
| 59765  | 13 | 9  | 22.8 | 2302 | 1 | 1 | 1 | 697.4112  |
| 59765  | 13 | 9  | 22.8 | 2428 | 1 | 1 | 1 | 713.3905  |
| 59765  | 13 | 9  | 22.8 | 2519 | 1 | 1 | 1 | 729.4236  |
| 59765  | 13 | 9  | 22.8 | 2599 | 1 | 1 | 1 | 746.8908  |
| 59765  | 13 | 9  | 22.8 | 3623 | 1 | 1 | 1 | 932.9753  |
| 59765  | 13 | 9  | 22.8 | 5330 | 1 | 1 | 1 | 896.7966  |
| 31696  | 12 | 10 | 44.4 | 307  | 1 | 0 | 0 | 429.2456  |
| 31696  | 12 | 10 | 44.4 | 348  | 1 | 0 | 0 | 436.2541  |
| 31696  | 12 | 10 | 44.4 | 582  | 1 | 1 | 1 | 475.2769  |
| 31696  | 12 | 10 | 44.4 | 1074 | 1 | 1 | 1 | 537.7745  |

|        |    |    |      |      |   |   |   |           |
|--------|----|----|------|------|---|---|---|-----------|
| 31696  | 12 | 10 | 44.4 | 1664 | 1 | 1 | 1 | 610.3311  |
| 31696  | 12 | 10 | 44.4 | 2306 | 1 | 1 | 1 | 697.8798  |
| 31696  | 12 | 10 | 44.4 | 2373 | 1 | 1 | 1 | 704.8827  |
| 31696  | 12 | 10 | 44.4 | 2823 | 1 | 1 | 1 | 788.4223  |
| 31696  | 12 | 10 | 44.4 | 3948 | 1 | 1 | 1 | 984.4434  |
| 31696  | 12 | 10 | 44.4 | 5407 | 1 | 1 | 1 | 912.7852  |
| 63798  | 13 | 12 | 27.2 | 27   | 1 | 1 | 1 | 360.2262  |
| 63798  | 13 | 12 | 27.2 | 413  | 1 | 1 | 1 | 449.292   |
| 63798  | 13 | 12 | 27.2 | 1412 | 1 | 0 | 0 | 580.2546  |
| 63798  | 13 | 12 | 27.2 | 1518 | 1 | 1 | 1 | 592.7719  |
| 63798  | 13 | 12 | 27.2 | 1538 | 1 | 0 | 0 | 594.3551  |
| 63798  | 13 | 12 | 27.2 | 2582 | 1 | 1 | 1 | 495.5682  |
| 63798  | 13 | 12 | 27.2 | 2749 | 1 | 1 | 1 | 513.2858  |
| 63798  | 13 | 12 | 27.2 | 2767 | 1 | 1 | 1 | 774.9043  |
| 63798  | 13 | 12 | 27.2 | 3210 | 1 | 0 | 0 | 860.8774  |
| 63798  | 13 | 12 | 27.2 | 3410 | 1 | 1 | 1 | 898.8766  |
| 63798  | 13 | 12 | 27.2 | 3768 | 1 | 0 | 1 | 952.9825  |
| 63798  | 13 | 12 | 27.2 | 5054 | 1 | 0 | 0 | 1205.571  |
| 72129  | 7  | 6  | 14.8 | 1948 | 1 | 1 | 1 | 646.379   |
| 72129  | 7  | 6  | 14.8 | 2486 | 1 | 1 | 1 | 722.406   |
| 72129  | 7  | 6  | 14.8 | 3345 | 1 | 1 | 1 | 886.0199  |
| 72129  | 7  | 6  | 14.8 | 3740 | 1 | 1 | 1 | 947.4667  |
| 72129  | 7  | 6  | 14.8 | 3826 | 1 | 1 | 1 | 963.0166  |
| 72129  | 7  | 6  | 14.8 | 5170 | 1 | 1 | 1 | 843.0563  |
| 109501 | 9  | 8  | 10.7 | 628  | 1 | 1 | 1 | 480.7974  |
| 109501 | 9  | 8  | 10.7 | 818  | 1 | 1 | 1 | 503.7882  |
| 109501 | 9  | 8  | 10.7 | 932  | 1 | 1 | 1 | 518.782   |
| 109501 | 9  | 8  | 10.7 | 1305 | 1 | 1 | 1 | 567.3317  |
| 109501 | 9  | 8  | 10.7 | 2585 | 1 | 1 | 1 | 743.9272  |
| 109501 | 9  | 8  | 10.7 | 3273 | 1 | 1 | 1 | 874.4511  |
| 109501 | 9  | 8  | 10.7 | 3795 | 1 | 1 | 1 | 957.9873  |
| 109501 | 9  | 8  | 10.7 | 5107 | 1 | 1 | 1 | 1231.1429 |
| 44356  | 7  | 6  | 24.6 | 883  | 1 | 1 | 1 | 512.7433  |
| 44356  | 7  | 6  | 24.6 | 1086 | 1 | 1 | 1 | 539.2657  |
| 44356  | 7  | 6  | 24.6 | 1896 | 1 | 1 | 1 | 639.8161  |
| 44356  | 7  | 6  | 24.6 | 3851 | 1 | 1 | 1 | 967.4698  |
| 44356  | 7  | 6  | 24.6 | 4497 | 1 | 1 | 1 | 1101.5516 |
| 44356  | 7  | 6  | 24.6 | 6201 | 1 | 1 | 1 | 1125.5311 |
| 83408  | 10 | 10 | 16.9 | 753  | 1 | 1 | 1 | 495.7842  |
| 83408  | 10 | 10 | 16.9 | 956  | 1 | 1 | 1 | 521.751   |
| 83408  | 10 | 10 | 16.9 | 1723 | 1 | 1 | 1 | 618.8243  |
| 83408  | 10 | 10 | 16.9 | 1808 | 1 | 1 | 1 | 628.8295  |
| 83408  | 10 | 10 | 16.9 | 2075 | 1 | 1 | 1 | 442.565   |
| 83408  | 10 | 10 | 16.9 | 2547 | 1 | 1 | 1 | 735.9007  |
| 83408  | 10 | 10 | 16.9 | 2990 | 1 | 1 | 1 | 823.4196  |
| 83408  | 10 | 10 | 16.9 | 2999 | 1 | 1 | 1 | 825.4008  |
| 83408  | 10 | 10 | 16.9 | 3041 | 1 | 1 | 1 | 833.4274  |
| 83408  | 10 | 10 | 16.9 | 3200 | 1 | 1 | 1 | 572.9799  |
| 65220  | 9  | 6  | 17   | 1356 | 1 | 1 | 1 | 573.8037  |
| 65220  | 9  | 6  | 17   | 1731 | 1 | 1 | 1 | 619.7949  |
| 65220  | 9  | 6  | 17   | 3016 | 1 | 1 | 1 | 829.4138  |
| 65220  | 9  | 6  | 17   | 3231 | 1 | 1 | 1 | 865.9202  |
| 65220  | 9  | 6  | 17   | 4413 | 1 | 1 | 1 | 1083.5525 |
| 65220  | 9  | 6  | 17   | 5323 | 1 | 1 | 1 | 894.1204  |
| 44974  | 7  | 6  | 25.1 | 2247 | 1 | 1 | 1 | 690.3619  |
| 44974  | 7  | 6  | 25.1 | 2339 | 1 | 1 | 1 | 701.3682  |
| 44974  | 7  | 6  | 25.1 | 2765 | 1 | 1 | 1 | 773.8977  |
| 44974  | 7  | 6  | 25.1 | 2927 | 1 | 1 | 1 | 809.9345  |

|        |    |    |      |      |   |   |   |           |
|--------|----|----|------|------|---|---|---|-----------|
| 44974  | 7  | 6  | 25.1 | 4395 | 1 | 1 | 1 | 1079.4994 |
| 44974  | 7  | 6  | 25.1 | 5801 | 1 | 1 | 1 | 1014.1701 |
| 40949  | 9  | 8  | 25.9 | 188  | 1 | 0 | 0 | 408.7505  |
| 40949  | 9  | 8  | 25.9 | 1486 | 1 | 0 | 0 | 587.8105  |
| 40949  | 9  | 8  | 25.9 | 1674 | 1 | 0 | 0 | 611.8189  |
| 40949  | 9  | 8  | 25.9 | 2571 | 1 | 0 | 0 | 740.3928  |
| 40949  | 9  | 8  | 25.9 | 2673 | 1 | 0 | 1 | 758.3623  |
| 40949  | 9  | 8  | 25.9 | 3429 | 1 | 1 | 1 | 900.9721  |
| 40949  | 9  | 8  | 25.9 | 3501 | 1 | 1 | 1 | 608.3263  |
| 40949  | 9  | 8  | 25.9 | 4393 | 1 | 0 | 0 | 719.6976  |
| 20667  | 8  | 7  | 53.6 | 1139 | 1 | 1 | 1 | 545.318   |
| 20667  | 8  | 7  | 53.6 | 1189 | 1 | 1 | 1 | 552.3098  |
| 20667  | 8  | 7  | 53.6 | 2803 | 1 | 1 | 1 | 783.3834  |
| 20667  | 8  | 7  | 53.6 | 2993 | 1 | 1 | 1 | 823.8878  |
| 20667  | 8  | 7  | 53.6 | 4257 | 1 | 1 | 1 | 702.7014  |
| 20667  | 8  | 7  | 53.6 | 4378 | 1 | 1 | 1 | 718.3514  |
| 20667  | 8  | 7  | 53.6 | 4907 | 1 | 1 | 1 | 1162.124  |
| 44960  | 11 | 10 | 30.6 | 50   | 1 | 1 | 0 | 369.7472  |
| 44960  | 11 | 10 | 30.6 | 524  | 1 | 1 | 0 | 466.2765  |
| 44960  | 11 | 10 | 30.6 | 1410 | 1 | 0 | 0 | 579.8293  |
| 44960  | 11 | 10 | 30.6 | 1864 | 1 | 1 | 0 | 637.3246  |
| 44960  | 11 | 10 | 30.6 | 1879 | 1 | 1 | 0 | 638.8489  |
| 44960  | 11 | 10 | 30.6 | 2025 | 1 | 1 | 0 | 656.7965  |
| 44960  | 11 | 10 | 30.6 | 2298 | 1 | 1 | 0 | 696.8827  |
| 44960  | 11 | 10 | 30.6 | 2326 | 1 | 1 | 0 | 699.8286  |
| 44960  | 11 | 10 | 30.6 | 3864 | 1 | 1 | 1 | 968.9875  |
| 44960  | 11 | 10 | 30.6 | 4585 | 1 | 1 | 0 | 741.7413  |
| 58865  | 9  | 8  | 22.4 | 632  | 1 | 1 | 1 | 481.2713  |
| 58865  | 9  | 8  | 22.4 | 1737 | 1 | 1 | 1 | 620.8196  |
| 58865  | 9  | 8  | 22.4 | 2320 | 1 | 1 | 1 | 466.2504  |
| 58865  | 9  | 8  | 22.4 | 2349 | 1 | 1 | 1 | 702.3623  |
| 58865  | 9  | 8  | 22.4 | 2882 | 1 | 1 | 1 | 801.858   |
| 58865  | 9  | 8  | 22.4 | 3203 | 1 | 1 | 1 | 859.4498  |
| 58865  | 9  | 8  | 22.4 | 3837 | 1 | 1 | 1 | 964.9996  |
| 58865  | 9  | 8  | 22.4 | 5716 | 1 | 1 | 1 | 978.1474  |
| 41876  | 12 | 9  | 35   | 158  | 1 | 0 | 0 | 400.7718  |
| 41876  | 12 | 9  | 35   | 698  | 1 | 0 | 0 | 488.7276  |
| 41876  | 12 | 9  | 35   | 852  | 1 | 1 | 0 | 507.7442  |
| 41876  | 12 | 9  | 35   | 1436 | 1 | 0 | 0 | 582.3023  |
| 41876  | 12 | 9  | 35   | 2675 | 1 | 0 | 0 | 758.3777  |
| 41876  | 12 | 9  | 35   | 3895 | 1 | 0 | 0 | 974.94    |
| 41876  | 12 | 9  | 35   | 3910 | 1 | 0 | 0 | 977.5349  |
| 41876  | 12 | 9  | 35   | 4545 | 1 | 1 | 0 | 1107.0481 |
| 41876  | 12 | 9  | 35   | 5927 | 1 | 0 | 0 | 1051.2186 |
| 125058 | 12 | 11 | 18.5 | 782  | 1 | 1 | 1 | 499.3238  |
| 125058 | 12 | 11 | 18.5 | 1455 | 1 | 1 | 1 | 583.8061  |
| 125058 | 12 | 11 | 18.5 | 1991 | 1 | 1 | 1 | 651.9041  |
| 125058 | 12 | 11 | 18.5 | 4422 | 1 | 1 | 1 | 1085.6006 |
| 125058 | 12 | 11 | 18.5 | 4439 | 1 | 1 | 1 | 1089.0721 |
| 125058 | 12 | 11 | 18.5 | 4490 | 1 | 1 | 1 | 733.7071  |
| 125058 | 12 | 11 | 18.5 | 4988 | 1 | 1 | 1 | 1190.5692 |
| 125058 | 12 | 11 | 18.5 | 5145 | 1 | 1 | 1 | 1252.6302 |
| 125058 | 12 | 11 | 18.5 | 5240 | 1 | 1 | 1 | 864.4177  |
| 125058 | 12 | 11 | 18.5 | 5518 | 1 | 1 | 1 | 696.8503  |
| 125058 | 12 | 11 | 18.5 | 5554 | 1 | 1 | 1 | 933.8481  |
| 22118  | 10 | 9  | 57.7 | 414  | 1 | 1 | 1 | 449.7533  |
| 22118  | 10 | 9  | 57.7 | 1468 | 1 | 1 | 1 | 585.8052  |
| 22118  | 10 | 9  | 57.7 | 1740 | 1 | 1 | 1 | 620.8558  |

|        |    |    |      |      |   |   |   |           |
|--------|----|----|------|------|---|---|---|-----------|
| 22118  | 10 | 9  | 57.7 | 2235 | 1 | 1 | 1 | 688.3839  |
| 22118  | 10 | 9  | 57.7 | 2839 | 1 | 1 | 1 | 791.9307  |
| 22118  | 10 | 9  | 57.7 | 3400 | 1 | 1 | 1 | 598.3051  |
| 22118  | 10 | 9  | 57.7 | 3629 | 1 | 1 | 1 | 933.4738  |
| 22118  | 10 | 9  | 57.7 | 3638 | 1 | 1 | 1 | 623.335   |
| 22118  | 10 | 9  | 57.7 | 3796 | 1 | 1 | 1 | 639.0106  |
| 67582  | 8  | 7  | 17.6 | 1419 | 1 | 1 | 1 | 580.8332  |
| 67582  | 8  | 7  | 17.6 | 1516 | 1 | 1 | 1 | 592.3192  |
| 67582  | 8  | 7  | 17.6 | 1621 | 1 | 1 | 1 | 604.3375  |
| 67582  | 8  | 7  | 17.6 | 1820 | 1 | 1 | 1 | 630.8452  |
| 67582  | 8  | 7  | 17.6 | 2091 | 1 | 1 | 1 | 665.86    |
| 67582  | 8  | 7  | 17.6 | 2715 | 1 | 1 | 1 | 764.9321  |
| 67582  | 8  | 7  | 17.6 | 6322 | 1 | 1 | 1 | 1204.5782 |
| 73174  | 11 | 10 | 18.2 | 308  | 1 | 1 | 1 | 429.2633  |
| 73174  | 11 | 10 | 18.2 | 727  | 1 | 0 | 0 | 492.7896  |
| 73174  | 11 | 10 | 18.2 | 1287 | 1 | 1 | 1 | 565.7876  |
| 73174  | 11 | 10 | 18.2 | 1545 | 1 | 1 | 1 | 595.8425  |
| 73174  | 11 | 10 | 18.2 | 1720 | 1 | 1 | 1 | 618.2908  |
| 73174  | 11 | 10 | 18.2 | 1802 | 1 | 0 | 0 | 628.8126  |
| 73174  | 11 | 10 | 18.2 | 2403 | 1 | 1 | 1 | 709.3671  |
| 73174  | 11 | 10 | 18.2 | 2448 | 1 | 0 | 0 | 717.3686  |
| 73174  | 11 | 10 | 18.2 | 2911 | 1 | 1 | 1 | 538.6291  |
| 73174  | 11 | 10 | 18.2 | 5101 | 1 | 1 | 1 | 1228.7036 |
| 55711  | 7  | 7  | 22.5 | 1264 | 1 | 1 | 1 | 562.2932  |
| 55711  | 7  | 7  | 22.5 | 1830 | 1 | 1 | 1 | 421.8862  |
| 55711  | 7  | 7  | 22.5 | 2036 | 1 | 1 | 1 | 658.8381  |
| 55711  | 7  | 7  | 22.5 | 2797 | 1 | 1 | 1 | 780.9084  |
| 55711  | 7  | 7  | 22.5 | 4273 | 1 | 1 | 1 | 1058.5105 |
| 55711  | 7  | 7  | 22.5 | 4983 | 1 | 1 | 1 | 1188.5606 |
| 55711  | 7  | 7  | 22.5 | 5096 | 1 | 1 | 1 | 817.3916  |
| 42056  | 11 | 10 | 39.8 | 158  | 1 | 0 | 0 | 400.7718  |
| 42056  | 11 | 10 | 39.8 | 698  | 1 | 0 | 0 | 488.7276  |
| 42056  | 11 | 10 | 39.8 | 1294 | 1 | 1 | 0 | 566.767   |
| 42056  | 11 | 10 | 39.8 | 1436 | 1 | 0 | 0 | 582.3023  |
| 42056  | 11 | 10 | 39.8 | 2675 | 1 | 0 | 0 | 758.3777  |
| 42056  | 11 | 10 | 39.8 | 3396 | 1 | 1 | 1 | 895.9478  |
| 42056  | 11 | 10 | 39.8 | 3953 | 1 | 0 | 1 | 657.0319  |
| 42056  | 11 | 10 | 39.8 | 3966 | 1 | 1 | 0 | 659.2991  |
| 42056  | 11 | 10 | 39.8 | 4545 | 1 | 0 | 0 | 1107.0481 |
| 42056  | 11 | 10 | 39.8 | 5927 | 1 | 0 | 0 | 1051.2186 |
| 137407 | 9  | 8  | 8.1  | 739  | 1 | 1 | 1 | 494.7458  |
| 137407 | 9  | 8  | 8.1  | 924  | 1 | 1 | 1 | 518.2829  |
| 137407 | 9  | 8  | 8.1  | 1605 | 1 | 1 | 1 | 603.2808  |
| 137407 | 9  | 8  | 8.1  | 1775 | 1 | 1 | 1 | 625.3124  |
| 137407 | 9  | 8  | 8.1  | 2272 | 1 | 1 | 1 | 692.3793  |
| 137407 | 9  | 8  | 8.1  | 2612 | 1 | 1 | 1 | 748.922   |
| 137407 | 9  | 8  | 8.1  | 2925 | 1 | 1 | 1 | 809.9277  |
| 137407 | 9  | 8  | 8.1  | 3792 | 1 | 1 | 1 | 957.0774  |
| 47357  | 9  | 9  | 28   | 547  | 1 | 1 | 1 | 470.7765  |
| 47357  | 9  | 9  | 28   | 1849 | 1 | 1 | 1 | 634.809   |
| 47357  | 9  | 9  | 28   | 2018 | 1 | 1 | 0 | 655.3793  |
| 47357  | 9  | 9  | 28   | 2183 | 1 | 1 | 0 | 680.3979  |
| 47357  | 9  | 9  | 28   | 2226 | 1 | 1 | 1 | 686.8794  |
| 47357  | 9  | 9  | 28   | 3008 | 1 | 1 | 0 | 827.4098  |
| 47357  | 9  | 9  | 28   | 3061 | 1 | 1 | 1 | 838.9143  |
| 47357  | 9  | 9  | 28   | 3774 | 1 | 1 | 1 | 953.5119  |
| 47357  | 9  | 9  | 28   | 3898 | 1 | 1 | 1 | 975.4372  |
| 65977  | 9  | 8  | 17.4 | 255  | 1 | 1 | 1 | 420.2368  |

|       |    |    |      |      |   |   |   |           |
|-------|----|----|------|------|---|---|---|-----------|
| 65977 | 9  | 8  | 17.4 | 1504 | 1 | 1 | 1 | 591.2936  |
| 65977 | 9  | 8  | 17.4 | 1938 | 1 | 1 | 1 | 644.8587  |
| 65977 | 9  | 8  | 17.4 | 2376 | 1 | 1 | 1 | 705.3523  |
| 65977 | 9  | 8  | 17.4 | 2717 | 1 | 1 | 1 | 765.4109  |
| 65977 | 9  | 8  | 17.4 | 2745 | 1 | 1 | 1 | 512.9919  |
| 65977 | 9  | 8  | 17.4 | 2867 | 1 | 1 | 1 | 532.2948  |
| 65977 | 9  | 8  | 17.4 | 3496 | 1 | 1 | 1 | 910.9609  |
| 59440 | 8  | 8  | 22.2 | 458  | 1 | 1 | 1 | 456.2521  |
| 59440 | 8  | 8  | 22.2 | 1845 | 1 | 1 | 1 | 634.3714  |
| 59440 | 8  | 8  | 22.2 | 2213 | 1 | 0 | 0 | 685.3193  |
| 59440 | 8  | 8  | 22.2 | 2829 | 1 | 1 | 1 | 526.6225  |
| 59440 | 8  | 8  | 22.2 | 2916 | 1 | 0 | 0 | 807.9607  |
| 59440 | 8  | 8  | 22.2 | 3045 | 1 | 0 | 0 | 835.4178  |
| 59440 | 8  | 8  | 22.2 | 4617 | 1 | 1 | 1 | 743.758   |
| 59440 | 8  | 8  | 22.2 | 5137 | 1 | 1 | 1 | 831.4548  |
| 64169 | 6  | 5  | 12.3 | 1514 | 1 | 1 | 0 | 591.8583  |
| 64169 | 6  | 5  | 12.3 | 1582 | 1 | 1 | 1 | 600.3352  |
| 64169 | 6  | 5  | 12.3 | 1910 | 1 | 1 | 0 | 640.8874  |
| 64169 | 6  | 5  | 12.3 | 2783 | 1 | 1 | 0 | 776.8809  |
| 64169 | 6  | 5  | 12.3 | 5205 | 1 | 1 | 1 | 1285.2104 |
| 86221 | 9  | 8  | 12.4 | 77   | 1 | 1 | 1 | 378.2244  |
| 86221 | 9  | 8  | 12.4 | 892  | 1 | 1 | 1 | 513.8008  |
| 86221 | 9  | 8  | 12.4 | 962  | 1 | 1 | 1 | 522.2905  |
| 86221 | 9  | 8  | 12.4 | 1649 | 1 | 1 | 1 | 608.816   |
| 86221 | 9  | 8  | 12.4 | 1746 | 1 | 1 | 1 | 414.8763  |
| 86221 | 9  | 8  | 12.4 | 1780 | 1 | 1 | 1 | 625.8221  |
| 86221 | 9  | 8  | 12.4 | 2093 | 1 | 1 | 1 | 665.8822  |
| 86221 | 9  | 8  | 12.4 | 4878 | 1 | 1 | 1 | 1154.5816 |
| 47005 | 9  | 8  | 26.7 | 589  | 1 | 1 | 1 | 475.7692  |
| 47005 | 9  | 8  | 26.7 | 1660 | 1 | 1 | 1 | 406.5847  |
| 47005 | 9  | 8  | 26.7 | 1950 | 1 | 1 | 1 | 431.558   |
| 47005 | 9  | 8  | 26.7 | 2603 | 1 | 1 | 1 | 747.3686  |
| 47005 | 9  | 8  | 26.7 | 2769 | 1 | 1 | 1 | 774.9479  |
| 47005 | 9  | 8  | 26.7 | 3928 | 1 | 1 | 1 | 654.6624  |
| 47005 | 9  | 8  | 26.7 | 4239 | 1 | 1 | 1 | 699.3958  |
| 47005 | 9  | 8  | 26.7 | 4897 | 1 | 1 | 1 | 1159.5237 |
| 62339 | 9  | 9  | 19.7 | 122  | 1 | 1 | 0 | 393.2604  |
| 62339 | 9  | 9  | 19.7 | 218  | 1 | 1 | 0 | 413.755   |
| 62339 | 9  | 9  | 19.7 | 858  | 1 | 1 | 0 | 508.7665  |
| 62339 | 9  | 9  | 19.7 | 1572 | 1 | 1 | 0 | 598.8716  |
| 62339 | 9  | 9  | 19.7 | 1842 | 1 | 1 | 0 | 634.2915  |
| 62339 | 9  | 9  | 19.7 | 2398 | 1 | 1 | 1 | 708.3952  |
| 62339 | 9  | 9  | 19.7 | 2702 | 1 | 1 | 0 | 762.884   |
| 62339 | 9  | 9  | 19.7 | 3023 | 1 | 1 | 0 | 831.4047  |
| 62339 | 9  | 9  | 19.7 | 5253 | 1 | 1 | 1 | 873.1451  |
| 47042 | 9  | 9  | 37.6 | 256  | 1 | 1 | 1 | 420.763   |
| 47042 | 9  | 9  | 37.6 | 1037 | 1 | 1 | 0 | 533.3025  |
| 47042 | 9  | 9  | 37.6 | 2215 | 1 | 1 | 1 | 685.8473  |
| 47042 | 9  | 9  | 37.6 | 2407 | 1 | 1 | 1 | 710.3573  |
| 47042 | 9  | 9  | 37.6 | 2480 | 1 | 1 | 0 | 722.3346  |
| 47042 | 9  | 9  | 37.6 | 4403 | 1 | 1 | 1 | 721.3118  |
| 47042 | 9  | 9  | 37.6 | 5390 | 1 | 1 | 1 | 907.7922  |
| 47042 | 9  | 9  | 37.6 | 5792 | 1 | 1 | 1 | 1007.7668 |
| 47042 | 9  | 9  | 37.6 | 6252 | 1 | 1 | 1 | 858.9364  |
| 43168 | 11 | 11 | 38.4 | 91   | 1 | 1 | 1 | 383.2162  |
| 43168 | 11 | 11 | 38.4 | 354  | 1 | 1 | 1 | 437.2618  |
| 43168 | 11 | 11 | 38.4 | 705  | 1 | 1 | 1 | 490.2403  |
| 43168 | 11 | 11 | 38.4 | 1615 | 1 | 1 | 1 | 603.8068  |

|        |    |    |      |      |   |   |   |           |
|--------|----|----|------|------|---|---|---|-----------|
| 43168  | 11 | 11 | 38.4 | 1970 | 1 | 1 | 1 | 432.9306  |
| 43168  | 11 | 11 | 38.4 | 2511 | 1 | 1 | 1 | 727.3805  |
| 43168  | 11 | 11 | 38.4 | 2620 | 1 | 1 | 1 | 751.8641  |
| 43168  | 11 | 11 | 38.4 | 3028 | 1 | 1 | 1 | 831.9226  |
| 43168  | 11 | 11 | 38.4 | 3457 | 1 | 1 | 1 | 905.4186  |
| 43168  | 11 | 11 | 38.4 | 4992 | 1 | 1 | 1 | 795.0952  |
| 43168  | 11 | 11 | 38.4 | 5283 | 1 | 1 | 1 | 883.7834  |
| 47389  | 8  | 7  | 25.5 | 1410 | 1 | 0 | 0 | 579.8293  |
| 47389  | 8  | 7  | 25.5 | 2129 | 1 | 1 | 1 | 671.3181  |
| 47389  | 8  | 7  | 25.5 | 2574 | 1 | 1 | 1 | 493.9593  |
| 47389  | 8  | 7  | 25.5 | 3360 | 1 | 1 | 1 | 592.6292  |
| 47389  | 8  | 7  | 25.5 | 3745 | 1 | 1 | 1 | 948.4562  |
| 47389  | 8  | 7  | 25.5 | 3868 | 1 | 1 | 1 | 970.4803  |
| 47389  | 8  | 7  | 25.5 | 5081 | 1 | 1 | 1 | 811.7602  |
| 116744 | 5  | 5  | 7.5  | 517  | 1 | 1 | 1 | 465.2926  |
| 116744 | 5  | 5  | 7.5  | 2120 | 1 | 1 | 1 | 669.8689  |
| 116744 | 5  | 5  | 7.5  | 2270 | 1 | 1 | 1 | 692.3498  |
| 116744 | 5  | 5  | 7.5  | 4557 | 1 | 1 | 1 | 739.7753  |
| 116744 | 5  | 5  | 7.5  | 4871 | 1 | 1 | 1 | 1152.0987 |
| 123905 | 6  | 6  | 6.8  | 961  | 1 | 1 | 1 | 522.2854  |
| 123905 | 6  | 6  | 6.8  | 2131 | 1 | 1 | 1 | 671.3378  |
| 123905 | 6  | 6  | 6.8  | 2197 | 1 | 1 | 1 | 682.4027  |
| 123905 | 6  | 6  | 6.8  | 3048 | 1 | 1 | 1 | 836.4709  |
| 123905 | 6  | 6  | 6.8  | 5098 | 1 | 1 | 1 | 1225.6447 |
| 123905 | 6  | 6  | 6.8  | 5386 | 1 | 1 | 1 | 907.4945  |
| 59477  | 5  | 5  | 18.2 | 1569 | 1 | 1 | 1 | 598.3265  |
| 59477  | 5  | 5  | 18.2 | 3430 | 1 | 1 | 1 | 900.9997  |
| 59477  | 5  | 5  | 18.2 | 3595 | 1 | 1 | 1 | 928.0329  |
| 59477  | 5  | 5  | 18.2 | 4584 | 1 | 1 | 1 | 1112.0987 |
| 59477  | 5  | 5  | 18.2 | 5984 | 1 | 1 | 1 | 1068.2241 |
| 42064  | 11 | 9  | 31.6 | 158  | 1 | 0 | 0 | 400.7718  |
| 42064  | 11 | 9  | 31.6 | 698  | 1 | 0 | 0 | 488.7276  |
| 42064  | 11 | 9  | 31.6 | 852  | 1 | 0 | 0 | 507.7442  |
| 42064  | 11 | 9  | 31.6 | 1436 | 1 | 0 | 0 | 582.3023  |
| 42064  | 11 | 9  | 31.6 | 1555 | 1 | 0 | 0 | 596.7684  |
| 42064  | 11 | 9  | 31.6 | 2675 | 1 | 0 | 0 | 758.3777  |
| 42064  | 11 | 9  | 31.6 | 3355 | 1 | 0 | 0 | 887.9518  |
| 42064  | 11 | 9  | 31.6 | 3855 | 1 | 1 | 0 | 645.6233  |
| 153955 | 7  | 7  | 7.5  | 1946 | 1 | 1 | 1 | 646.3483  |
| 153955 | 7  | 7  | 7.5  | 1966 | 1 | 1 | 1 | 648.4242  |
| 153955 | 7  | 7  | 7.5  | 2236 | 1 | 1 | 1 | 688.4134  |
| 153955 | 7  | 7  | 7.5  | 3875 | 1 | 1 | 1 | 648.3701  |
| 153955 | 7  | 7  | 7.5  | 4078 | 1 | 1 | 1 | 1015.07   |
| 153955 | 7  | 7  | 7.5  | 4191 | 1 | 1 | 1 | 1037.567  |
| 153955 | 7  | 7  | 7.5  | 5272 | 1 | 1 | 1 | 879.1386  |
| 40331  | 5  | 5  | 22.2 | 1541 | 1 | 1 | 1 | 595.3243  |
| 40331  | 5  | 5  | 22.2 | 2136 | 1 | 1 | 1 | 672.3616  |
| 40331  | 5  | 5  | 22.2 | 2369 | 1 | 1 | 1 | 704.8406  |
| 40331  | 5  | 5  | 22.2 | 3504 | 1 | 1 | 1 | 912.48    |
| 40331  | 5  | 5  | 22.2 | 5125 | 1 | 1 | 1 | 1240.5409 |
| 44425  | 7  | 6  | 22.5 | 702  | 1 | 1 | 1 | 489.7667  |
| 44425  | 7  | 6  | 22.5 | 874  | 1 | 1 | 1 | 511.2872  |
| 44425  | 7  | 6  | 22.5 | 2164 | 1 | 1 | 1 | 677.4026  |
| 44425  | 7  | 6  | 22.5 | 2719 | 1 | 1 | 1 | 766.3647  |
| 44425  | 7  | 6  | 22.5 | 3093 | 1 | 1 | 1 | 841.9223  |
| 44425  | 7  | 6  | 22.5 | 5878 | 1 | 1 | 1 | 1036.8457 |
| 100826 | 10 | 9  | 16.9 | 1212 | 1 | 1 | 1 | 555.274   |
| 100826 | 10 | 9  | 16.9 | 1362 | 1 | 1 | 1 | 574.8013  |

|        |    |   |      |      |   |   |   |           |
|--------|----|---|------|------|---|---|---|-----------|
| 100826 | 10 | 9 | 16.9 | 1983 | 1 | 1 | 1 | 651.3286  |
| 100826 | 10 | 9 | 16.9 | 2600 | 1 | 1 | 1 | 746.9033  |
| 100826 | 10 | 9 | 16.9 | 2759 | 1 | 1 | 1 | 515.2841  |
| 100826 | 10 | 9 | 16.9 | 4120 | 1 | 1 | 1 | 1023.0552 |
| 100826 | 10 | 9 | 16.9 | 5154 | 1 | 1 | 1 | 837.682   |
| 100826 | 10 | 9 | 16.9 | 5662 | 1 | 1 | 1 | 962.844   |
| 100826 | 10 | 9 | 16.9 | 5887 | 1 | 1 | 1 | 779.1661  |
| 98576  | 7  | 6 | 8.6  | 937  | 1 | 0 | 0 | 519.2693  |
| 98576  | 7  | 6 | 8.6  | 1800 | 1 | 0 | 0 | 628.3411  |
| 98576  | 7  | 6 | 8.6  | 1881 | 1 | 0 | 0 | 639.3143  |
| 98576  | 7  | 6 | 8.6  | 2352 | 1 | 0 | 0 | 702.4366  |
| 98576  | 7  | 6 | 8.6  | 2805 | 1 | 0 | 0 | 783.4575  |
| 98576  | 7  | 6 | 8.6  | 3155 | 1 | 1 | 1 | 851.5133  |
| 57763  | 10 | 9 | 25.6 | 14   | 1 | 1 | 1 | 356.7213  |
| 57763  | 10 | 9 | 25.6 | 1476 | 1 | 1 | 1 | 587.3002  |
| 57763  | 10 | 9 | 25.6 | 2054 | 1 | 1 | 1 | 440.8809  |
| 57763  | 10 | 9 | 25.6 | 2327 | 1 | 1 | 1 | 699.8429  |
| 57763  | 10 | 9 | 25.6 | 2710 | 1 | 1 | 1 | 763.8906  |
| 57763  | 10 | 9 | 25.6 | 3836 | 1 | 1 | 1 | 643.6541  |
| 57763  | 10 | 9 | 25.6 | 4789 | 1 | 1 | 1 | 1136.5868 |
| 57763  | 10 | 9 | 25.6 | 5165 | 1 | 1 | 1 | 841.4655  |
| 57763  | 10 | 9 | 25.6 | 6086 | 1 | 1 | 1 | 1107.5528 |
| 219009 | 5  | 5 | 3.6  | 1184 | 1 | 1 | 1 | 551.8349  |
| 219009 | 5  | 5 | 3.6  | 2024 | 1 | 1 | 1 | 656.3978  |
| 219009 | 5  | 5 | 3.6  | 2762 | 1 | 1 | 1 | 772.9028  |
| 219009 | 5  | 5 | 3.6  | 3225 | 1 | 1 | 1 | 863.428   |
| 219009 | 5  | 5 | 3.6  | 4921 | 1 | 1 | 1 | 778.4284  |
| 61584  | 8  | 8 | 15.3 | 122  | 1 | 0 | 0 | 393.2604  |
| 61584  | 8  | 8 | 15.3 | 218  | 1 | 0 | 0 | 413.755   |
| 61584  | 8  | 8 | 15.3 | 858  | 1 | 0 | 0 | 508.7665  |
| 61584  | 8  | 8 | 15.3 | 1572 | 1 | 0 | 0 | 598.8716  |
| 61584  | 8  | 8 | 15.3 | 1842 | 1 | 0 | 0 | 634.2915  |
| 61584  | 8  | 8 | 15.3 | 2406 | 1 | 1 | 1 | 709.8504  |
| 61584  | 8  | 8 | 15.3 | 2702 | 1 | 0 | 0 | 762.884   |
| 61584  | 8  | 8 | 15.3 | 3023 | 1 | 0 | 0 | 831.4047  |
| 39964  | 6  | 5 | 18   | 1561 | 1 | 0 | 0 | 597.335   |
| 39964  | 6  | 5 | 18   | 1653 | 1 | 0 | 0 | 609.306   |
| 39964  | 6  | 5 | 18   | 2418 | 1 | 0 | 0 | 712.3355  |
| 39964  | 6  | 5 | 18   | 2544 | 1 | 1 | 1 | 735.4066  |
| 39964  | 6  | 5 | 18   | 4652 | 1 | 1 | 1 | 1118.5751 |
| 34389  | 5  | 5 | 26.9 | 259  | 1 | 1 | 1 | 421.2662  |
| 34389  | 5  | 5 | 26.9 | 2071 | 1 | 1 | 1 | 662.8954  |
| 34389  | 5  | 5 | 26.9 | 2877 | 1 | 1 | 1 | 800.4107  |
| 34389  | 5  | 5 | 26.9 | 3074 | 1 | 1 | 1 | 839.9171  |
| 34389  | 5  | 5 | 26.9 | 6059 | 1 | 1 | 1 | 1101.5703 |
| 90209  | 7  | 6 | 10.3 | 1515 | 1 | 1 | 1 | 592.303   |
| 90209  | 7  | 6 | 10.3 | 1575 | 1 | 1 | 1 | 599.2982  |
| 90209  | 7  | 6 | 10.3 | 2021 | 1 | 1 | 1 | 655.8255  |
| 90209  | 7  | 6 | 10.3 | 2598 | 1 | 1 | 1 | 746.4067  |
| 90209  | 7  | 6 | 10.3 | 2738 | 1 | 1 | 1 | 768.3675  |
| 90209  | 7  | 6 | 10.3 | 5045 | 1 | 1 | 1 | 1204.1301 |
| 44788  | 7  | 7 | 20.4 | 554  | 1 | 1 | 0 | 471.28    |
| 44788  | 7  | 7 | 20.4 | 922  | 1 | 1 | 1 | 517.7687  |
| 44788  | 7  | 7 | 20.4 | 2487 | 1 | 1 | 0 | 482.2237  |
| 44788  | 7  | 7 | 20.4 | 2816 | 1 | 1 | 0 | 524.9218  |
| 44788  | 7  | 7 | 20.4 | 2906 | 1 | 1 | 0 | 807.4055  |
| 44788  | 7  | 7 | 20.4 | 3839 | 1 | 1 | 1 | 965.4065  |
| 44788  | 7  | 7 | 20.4 | 4427 | 1 | 1 | 0 | 1086.5388 |

|        |   |   |      |      |   |   |   |           |
|--------|---|---|------|------|---|---|---|-----------|
| 45894  | 7 | 7 | 23   | 759  | 1 | 1 | 1 | 496.7741  |
| 45894  | 7 | 7 | 23   | 1410 | 1 | 0 | 0 | 579.8293  |
| 45894  | 7 | 7 | 23   | 1856 | 1 | 1 | 1 | 424.5668  |
| 45894  | 7 | 7 | 23   | 1940 | 1 | 1 | 1 | 645.3055  |
| 45894  | 7 | 7 | 23   | 2411 | 1 | 1 | 1 | 474.2806  |
| 45894  | 7 | 7 | 23   | 4076 | 1 | 1 | 1 | 1015.0332 |
| 45894  | 7 | 7 | 23   | 4185 | 1 | 1 | 1 | 1035.4696 |
| 80287  | 7 | 6 | 11.9 | 1809 | 1 | 1 | 0 | 628.8516  |
| 80287  | 7 | 6 | 11.9 | 1944 | 1 | 1 | 0 | 646.3225  |
| 80287  | 7 | 6 | 11.9 | 2056 | 1 | 1 | 0 | 660.8327  |
| 80287  | 7 | 6 | 11.9 | 2713 | 1 | 1 | 1 | 764.4039  |
| 80287  | 7 | 6 | 11.9 | 2841 | 1 | 1 | 1 | 528.6018  |
| 80287  | 7 | 6 | 11.9 | 4664 | 1 | 1 | 1 | 1120.5792 |
| 40463  | 7 | 5 | 16.3 | 336  | 1 | 1 | 1 | 435.2531  |
| 40463  | 7 | 5 | 16.3 | 764  | 1 | 1 | 1 | 497.2813  |
| 40463  | 7 | 5 | 16.3 | 1173 | 1 | 1 | 1 | 550.7581  |
| 40463  | 7 | 5 | 16.3 | 2828 | 1 | 1 | 1 | 789.3995  |
| 40463  | 7 | 5 | 16.3 | 4334 | 1 | 1 | 1 | 1069.5954 |
| 34426  | 5 | 3 | 16.1 | 973  | 1 | 1 | 0 | 523.2981  |
| 34426  | 5 | 3 | 16.1 | 2390 | 1 | 1 | 0 | 706.4233  |
| 34426  | 5 | 3 | 16.1 | 5773 | 1 | 1 | 1 | 997.5596  |
| 34394  | 3 | 2 | 8.6  | 669  | 1 | 1 | 1 | 485.3078  |
| 34394  | 3 | 2 | 8.6  | 3146 | 1 | 1 | 1 | 849.9857  |
| 73869  | 5 | 5 | 9.7  | 1394 | 1 | 1 | 1 | 578.3275  |
| 73869  | 5 | 5 | 9.7  | 1802 | 1 | 0 | 0 | 628.8126  |
| 73869  | 5 | 5 | 9.7  | 2188 | 1 | 1 | 1 | 681.3236  |
| 73869  | 5 | 5 | 9.7  | 2607 | 1 | 1 | 1 | 747.8647  |
| 73869  | 5 | 5 | 9.7  | 4142 | 1 | 1 | 1 | 1027.0096 |
| 27673  | 3 | 3 | 16.8 | 1937 | 1 | 1 | 1 | 644.8377  |
| 27673  | 3 | 3 | 16.8 | 2419 | 1 | 1 | 1 | 712.3385  |
| 27673  | 3 | 3 | 16.8 | 3874 | 1 | 1 | 1 | 971.9985  |
| 44808  | 6 | 6 | 17.9 | 554  | 1 | 0 | 0 | 471.28    |
| 44808  | 6 | 6 | 17.9 | 2487 | 1 | 0 | 0 | 482.2237  |
| 44808  | 6 | 6 | 17.9 | 2816 | 1 | 0 | 0 | 524.9218  |
| 44808  | 6 | 6 | 17.9 | 2906 | 1 | 0 | 0 | 807.4055  |
| 44808  | 6 | 6 | 17.9 | 3013 | 1 | 1 | 1 | 827.9534  |
| 44808  | 6 | 6 | 17.9 | 4427 | 1 | 0 | 0 | 1086.5388 |
| 182693 | 3 | 3 | 2.5  | 1228 | 1 | 1 | 1 | 557.3293  |
| 182693 | 3 | 3 | 2.5  | 2478 | 1 | 1 | 1 | 721.922   |
| 182693 | 3 | 3 | 2.5  | 3480 | 1 | 1 | 1 | 908.4739  |
| 67832  | 4 | 4 | 7.6  | 1277 | 1 | 1 | 1 | 563.8575  |
| 67832  | 4 | 4 | 7.6  | 1725 | 1 | 1 | 1 | 618.8506  |
| 67832  | 4 | 4 | 7.6  | 2078 | 1 | 1 | 1 | 663.8562  |
| 67832  | 4 | 4 | 7.6  | 2375 | 1 | 1 | 1 | 704.8953  |
| 25092  | 5 | 5 | 29.3 | 654  | 1 | 1 | 0 | 483.2505  |
| 25092  | 5 | 5 | 29.3 | 1763 | 1 | 1 | 0 | 623.3445  |
| 25092  | 5 | 5 | 29.3 | 2798 | 1 | 1 | 1 | 781.365   |
| 25092  | 5 | 5 | 29.3 | 3014 | 1 | 1 | 1 | 829.3756  |
| 25092  | 5 | 5 | 29.3 | 3161 | 1 | 1 | 1 | 852.9483  |
| 48286  | 5 | 5 | 13.6 | 381  | 1 | 1 | 1 | 441.7113  |
| 48286  | 5 | 5 | 13.6 | 1741 | 1 | 1 | 1 | 621.3302  |
| 48286  | 5 | 5 | 13.6 | 1839 | 1 | 1 | 1 | 633.8397  |
| 48286  | 5 | 5 | 13.6 | 2364 | 1 | 1 | 1 | 704.3096  |
| 48286  | 5 | 5 | 13.6 | 3250 | 1 | 1 | 1 | 869.4271  |
| 100050 | 5 | 5 | 8.8  | 1661 | 1 | 1 | 0 | 609.8398  |
| 100050 | 5 | 5 | 8.8  | 2227 | 1 | 1 | 0 | 686.8973  |
| 100050 | 5 | 5 | 8.8  | 2919 | 1 | 1 | 0 | 808.4564  |
| 100050 | 5 | 5 | 8.8  | 4913 | 1 | 1 | 0 | 776.4274  |

|        |    |   |      |      |   |   |   |           |
|--------|----|---|------|------|---|---|---|-----------|
| 100050 | 5  | 5 | 8.8  | 5162 | 1 | 1 | 1 | 841.4386  |
| 71719  | 4  | 3 | 8.5  | 1716 | 1 | 1 | 1 | 617.7867  |
| 71719  | 4  | 3 | 8.5  | 4096 | 1 | 1 | 1 | 1018.4944 |
| 71719  | 4  | 3 | 8.5  | 5314 | 1 | 1 | 1 | 1339.6332 |
| 63627  | 5  | 5 | 12.4 | 1514 | 1 | 0 | 0 | 591.8583  |
| 63627  | 5  | 5 | 12.4 | 1702 | 1 | 1 | 1 | 615.3529  |
| 63627  | 5  | 5 | 12.4 | 1910 | 1 | 0 | 0 | 640.8874  |
| 63627  | 5  | 5 | 12.4 | 2783 | 1 | 0 | 0 | 776.8809  |
| 63627  | 5  | 5 | 12.4 | 5242 | 1 | 1 | 1 | 865.8129  |
| 45355  | 3  | 2 | 7.4  | 2374 | 1 | 1 | 1 | 704.8867  |
| 45355  | 3  | 2 | 7.4  | 3587 | 1 | 1 | 1 | 927.0352  |
| 66087  | 3  | 2 | 4.8  | 2758 | 1 | 1 | 1 | 772.3875  |
| 66087  | 3  | 2 | 4.8  | 3100 | 1 | 1 | 1 | 842.4803  |
| 99776  | 5  | 5 | 8.4  | 1661 | 1 | 0 | 0 | 609.8398  |
| 99776  | 5  | 5 | 8.4  | 2227 | 1 | 0 | 0 | 686.8973  |
| 99776  | 5  | 5 | 8.4  | 2919 | 1 | 0 | 0 | 808.4564  |
| 99776  | 5  | 5 | 8.4  | 3632 | 1 | 1 | 1 | 933.5587  |
| 99776  | 5  | 5 | 8.4  | 4913 | 1 | 0 | 0 | 776.4274  |
| 118478 | 5  | 5 | 7.6  | 443  | 1 | 1 | 0 | 453.7558  |
| 118478 | 5  | 5 | 7.6  | 1801 | 1 | 1 | 1 | 628.3578  |
| 118478 | 5  | 5 | 7.6  | 3163 | 1 | 1 | 1 | 852.9985  |
| 118478 | 5  | 5 | 7.6  | 4467 | 1 | 1 | 1 | 729.7276  |
| 118478 | 5  | 5 | 7.6  | 5699 | 1 | 1 | 1 | 974.2085  |
| 60195  | 5  | 3 | 13.3 | 4813 | 1 | 1 | 1 | 761.0587  |
| 60195  | 5  | 3 | 13.3 | 4895 | 1 | 1 | 1 | 772.7418  |
| 60195  | 5  | 3 | 13.3 | 5907 | 1 | 1 | 1 | 1045.8528 |
| 264216 | 5  | 4 | 2.7  | 1834 | 1 | 1 | 1 | 633.2959  |
| 264216 | 5  | 4 | 2.7  | 2370 | 1 | 1 | 1 | 704.8469  |
| 264216 | 5  | 4 | 2.7  | 3881 | 1 | 1 | 1 | 973.0227  |
| 264216 | 5  | 4 | 2.7  | 4922 | 1 | 1 | 1 | 778.7529  |
| 44816  | 11 | 9 | 24.7 | 373  | 1 | 1 | 1 | 440.7303  |
| 44816  | 11 | 9 | 24.7 | 541  | 1 | 1 | 1 | 469.2824  |
| 44816  | 11 | 9 | 24.7 | 724  | 1 | 1 | 1 | 492.2748  |
| 44816  | 11 | 9 | 24.7 | 916  | 1 | 1 | 1 | 517.2858  |
| 44816  | 11 | 9 | 24.7 | 1777 | 1 | 1 | 1 | 625.3209  |
| 44816  | 11 | 9 | 24.7 | 1786 | 1 | 1 | 1 | 626.7977  |
| 44816  | 11 | 9 | 24.7 | 2057 | 1 | 1 | 1 | 660.8366  |
| 44816  | 11 | 9 | 24.7 | 2869 | 1 | 1 | 1 | 798.851   |
| 44816  | 11 | 9 | 24.7 | 3339 | 1 | 1 | 1 | 590.3039  |
| 55890  | 6  | 6 | 17.8 | 639  | 1 | 1 | 1 | 481.769   |
| 55890  | 6  | 6 | 17.8 | 950  | 1 | 1 | 1 | 520.3106  |
| 55890  | 6  | 6 | 17.8 | 2258 | 1 | 1 | 1 | 691.3636  |
| 55890  | 6  | 6 | 17.8 | 2772 | 1 | 1 | 1 | 517.2879  |
| 55890  | 6  | 6 | 17.8 | 4405 | 1 | 1 | 1 | 721.642   |
| 55890  | 6  | 6 | 17.8 | 5011 | 1 | 1 | 1 | 797.4166  |
| 92772  | 3  | 2 | 3.8  | 2278 | 1 | 1 | 1 | 693.4033  |
| 92772  | 3  | 2 | 3.8  | 4175 | 1 | 1 | 1 | 1034.0533 |
| 22532  | 4  | 4 | 28.2 | 1061 | 1 | 1 | 0 | 536.3239  |
| 22532  | 4  | 4 | 28.2 | 2035 | 1 | 1 | 0 | 658.8335  |
| 22532  | 4  | 4 | 28.2 | 3180 | 1 | 1 | 1 | 854.9434  |
| 22532  | 4  | 4 | 28.2 | 4390 | 1 | 1 | 1 | 1078.507  |
| 31956  | 5  | 5 | 27   | 1292 | 1 | 1 | 1 | 566.3241  |
| 31956  | 5  | 5 | 27   | 1554 | 1 | 1 | 1 | 596.3524  |
| 31956  | 5  | 5 | 27   | 1837 | 1 | 1 | 1 | 633.3272  |
| 31956  | 5  | 5 | 27   | 3662 | 1 | 1 | 1 | 937.4726  |
| 31956  | 5  | 5 | 27   | 5997 | 1 | 1 | 1 | 1072.2495 |
| 17591  | 5  | 3 | 24.3 | 882  | 1 | 1 | 1 | 512.2995  |
| 17591  | 5  | 3 | 24.3 | 1019 | 1 | 1 | 1 | 530.7821  |

|        |   |   |      |      |   |   |   |           |
|--------|---|---|------|------|---|---|---|-----------|
| 17591  | 5 | 3 | 24.3 | 4247 | 1 | 1 | 1 | 1051.0322 |
| 23090  | 3 | 3 | 18.8 | 1559 | 1 | 1 | 0 | 398.5442  |
| 23090  | 3 | 3 | 18.8 | 2356 | 1 | 1 | 1 | 702.9024  |
| 23090  | 3 | 3 | 18.8 | 2954 | 1 | 1 | 0 | 816.4192  |
| 29193  | 4 | 4 | 20.1 | 380  | 1 | 1 | 1 | 441.2947  |
| 29193  | 4 | 4 | 20.1 | 1985 | 1 | 1 | 1 | 651.8145  |
| 29193  | 4 | 4 | 20.1 | 2105 | 1 | 1 | 1 | 667.869   |
| 29193  | 4 | 4 | 20.1 | 4473 | 1 | 1 | 1 | 1096.5695 |
| 49607  | 4 | 3 | 9.3  | 1641 | 1 | 1 | 1 | 607.3431  |
| 49607  | 4 | 3 | 9.3  | 2854 | 1 | 1 | 1 | 794.8993  |
| 49607  | 4 | 3 | 9.3  | 3337 | 1 | 0 | 0 | 590.2668  |
| 32347  | 5 | 5 | 22.5 | 2229 | 1 | 1 | 1 | 687.3459  |
| 32347  | 5 | 5 | 22.5 | 2303 | 1 | 1 | 1 | 697.8316  |
| 32347  | 5 | 5 | 22.5 | 2412 | 1 | 1 | 1 | 711.3071  |
| 32347  | 5 | 5 | 22.5 | 3050 | 1 | 1 | 1 | 837.4519  |
| 32347  | 5 | 5 | 22.5 | 3275 | 1 | 1 | 1 | 874.9625  |
| 117103 | 3 | 2 | 3    | 2182 | 1 | 1 | 1 | 679.8926  |
| 117103 | 3 | 2 | 3    | 4522 | 1 | 1 | 1 | 1104.0943 |
| 194402 | 4 | 4 | 3.9  | 1994 | 1 | 1 | 1 | 652.3407  |
| 194402 | 4 | 4 | 3.9  | 2459 | 1 | 1 | 1 | 718.3752  |
| 194402 | 4 | 4 | 3.9  | 4108 | 1 | 1 | 1 | 1020.5624 |
| 194402 | 4 | 4 | 3.9  | 5291 | 1 | 1 | 1 | 887.8183  |
| 99113  | 3 | 3 | 4.5  | 1761 | 1 | 1 | 1 | 622.8948  |
| 99113  | 3 | 3 | 4.5  | 1962 | 1 | 1 | 1 | 647.8628  |
| 99113  | 3 | 3 | 4.5  | 3705 | 1 | 1 | 1 | 943.0431  |
| 52003  | 6 | 5 | 17.7 | 466  | 1 | 1 | 1 | 457.2846  |
| 52003  | 6 | 5 | 17.7 | 3055 | 1 | 1 | 1 | 558.9712  |
| 52003  | 6 | 5 | 17.7 | 3492 | 1 | 1 | 1 | 607.6079  |
| 52003  | 6 | 5 | 17.7 | 4876 | 1 | 1 | 1 | 770.0444  |
| 52003  | 6 | 5 | 17.7 | 5126 | 1 | 1 | 1 | 1241.1694 |
| 47202  | 5 | 5 | 19   | 2018 | 1 | 0 | 0 | 655.3793  |
| 47202  | 5 | 5 | 19   | 2183 | 1 | 0 | 0 | 680.3979  |
| 47202  | 5 | 5 | 19   | 3008 | 1 | 0 | 0 | 827.4098  |
| 47202  | 5 | 5 | 19   | 4648 | 1 | 1 | 1 | 746.0482  |
| 47202  | 5 | 5 | 19   | 5250 | 1 | 1 | 1 | 870.1124  |
| 30915  | 3 | 3 | 19.5 | 3237 | 1 | 1 | 1 | 866.9492  |
| 30915  | 3 | 3 | 19.5 | 3890 | 1 | 1 | 1 | 973.9811  |
| 30915  | 3 | 3 | 19.5 | 4468 | 1 | 1 | 1 | 730.0898  |
| 77064  | 4 | 4 | 6    | 343  | 1 | 1 | 1 | 435.774   |
| 77064  | 4 | 4 | 6    | 1453 | 1 | 1 | 1 | 583.3162  |
| 77064  | 4 | 4 | 6    | 2256 | 1 | 1 | 1 | 691.3326  |
| 77064  | 4 | 4 | 6    | 2531 | 1 | 1 | 1 | 731.3881  |
| 27979  | 4 | 4 | 16.1 | 78   | 1 | 1 | 0 | 378.2606  |
| 27979  | 4 | 4 | 16.1 | 104  | 1 | 1 | 0 | 387.7656  |
| 27979  | 4 | 4 | 16.1 | 2654 | 1 | 1 | 0 | 753.8904  |
| 27979  | 4 | 4 | 16.1 | 2793 | 1 | 1 | 1 | 779.4264  |
| 105384 | 4 | 4 | 6.7  | 470  | 1 | 1 | 1 | 458.2609  |
| 105384 | 4 | 4 | 6.7  | 1784 | 1 | 1 | 1 | 626.3403  |
| 105384 | 4 | 4 | 6.7  | 3721 | 1 | 1 | 1 | 945.4709  |
| 105384 | 4 | 4 | 6.7  | 5964 | 1 | 1 | 1 | 1064.8576 |
| 15497  | 2 | 2 | 17.9 | 2212 | 1 | 1 | 1 | 684.8959  |
| 15497  | 2 | 2 | 17.9 | 2224 | 1 | 1 | 1 | 686.3957  |
| 196586 | 3 | 3 | 2.6  | 1599 | 1 | 1 | 0 | 601.8483  |
| 196586 | 3 | 3 | 2.6  | 2743 | 1 | 1 | 1 | 768.4797  |
| 196586 | 3 | 3 | 2.6  | 4159 | 1 | 1 | 1 | 1030.0659 |
| 32983  | 4 | 4 | 15.4 | 1011 | 1 | 1 | 1 | 529.3216  |
| 32983  | 4 | 4 | 15.4 | 1058 | 1 | 1 | 1 | 536.3059  |
| 32983  | 4 | 4 | 15.4 | 1797 | 1 | 1 | 1 | 627.851   |

|        |   |   |      |      |   |   |   |           |
|--------|---|---|------|------|---|---|---|-----------|
| 32983  | 4 | 4 | 15.4 | 2395 | 1 | 1 | 1 | 707.8698  |
| 271827 | 6 | 5 | 3    | 339  | 1 | 1 | 1 | 435.7431  |
| 271827 | 6 | 5 | 3    | 2346 | 1 | 1 | 1 | 701.8811  |
| 271827 | 6 | 5 | 3    | 3375 | 1 | 1 | 1 | 891.5096  |
| 271827 | 6 | 5 | 3    | 5049 | 1 | 1 | 1 | 803.4378  |
| 30060  | 4 | 4 | 22.5 | 1638 | 1 | 1 | 1 | 607.2847  |
| 30060  | 4 | 4 | 22.5 | 2931 | 1 | 1 | 1 | 810.448   |
| 30060  | 4 | 4 | 22.5 | 3279 | 1 | 1 | 1 | 584.2696  |
| 30060  | 4 | 4 | 22.5 | 4153 | 1 | 1 | 1 | 1029.4864 |
| 81293  | 6 | 6 | 9.6  | 511  | 1 | 1 | 1 | 464.7768  |
| 81293  | 6 | 6 | 9.6  | 1064 | 1 | 1 | 1 | 536.8419  |
| 81293  | 6 | 6 | 9.6  | 1113 | 1 | 1 | 1 | 543.3271  |
| 81293  | 6 | 6 | 9.6  | 1811 | 1 | 1 | 1 | 629.3253  |
| 81293  | 6 | 6 | 9.6  | 2113 | 1 | 1 | 1 | 668.8896  |
| 81293  | 6 | 6 | 9.6  | 4388 | 1 | 1 | 1 | 718.7027  |
| 20619  | 3 | 3 | 23.4 | 2467 | 1 | 1 | 1 | 719.9355  |
| 20619  | 3 | 3 | 23.4 | 2987 | 1 | 1 | 1 | 822.9331  |
| 20619  | 3 | 3 | 23.4 | 3042 | 1 | 1 | 1 | 834.3935  |
| 59426  | 4 | 4 | 12.1 | 1631 | 1 | 1 | 1 | 605.8449  |
| 59426  | 4 | 4 | 12.1 | 1840 | 1 | 1 | 1 | 633.8558  |
| 59426  | 4 | 4 | 12.1 | 4798 | 1 | 1 | 1 | 1139.1599 |
| 59426  | 4 | 4 | 12.1 | 5014 | 1 | 1 | 1 | 1196.1324 |
| 23230  | 4 | 4 | 21.2 | 79   | 1 | 1 | 1 | 378.7339  |
| 23230  | 4 | 4 | 21.2 | 1431 | 1 | 1 | 1 | 581.8266  |
| 23230  | 4 | 4 | 21.2 | 2035 | 1 | 0 | 1 | 658.8335  |
| 23230  | 4 | 4 | 21.2 | 2575 | 1 | 1 | 1 | 740.8861  |
| 23990  | 4 | 4 | 21.8 | 1061 | 1 | 0 | 0 | 536.3239  |
| 23990  | 4 | 4 | 21.8 | 1445 | 1 | 1 | 1 | 582.798   |
| 23990  | 4 | 4 | 21.8 | 2035 | 1 | 0 | 0 | 658.8335  |
| 23990  | 4 | 4 | 21.8 | 2903 | 1 | 1 | 1 | 805.9248  |
| 49361  | 2 | 2 | 6.6  | 1429 | 1 | 1 | 1 | 581.814   |
| 49361  | 2 | 2 | 6.6  | 3773 | 1 | 1 | 1 | 953.5039  |
| 20970  | 3 | 3 | 18.2 | 269  | 1 | 1 | 1 | 422.2504  |
| 20970  | 3 | 3 | 18.2 | 1506 | 1 | 1 | 1 | 591.3536  |
| 20970  | 3 | 3 | 18.2 | 2775 | 1 | 1 | 1 | 775.8845  |
| 29898  | 6 | 5 | 18.4 | 85   | 1 | 1 | 1 | 380.7214  |
| 29898  | 6 | 5 | 18.4 | 567  | 1 | 1 | 1 | 472.7741  |
| 29898  | 6 | 5 | 18.4 | 651  | 1 | 1 | 1 | 482.7769  |
| 29898  | 6 | 5 | 18.4 | 1684 | 1 | 1 | 1 | 613.3708  |
| 29898  | 6 | 5 | 18.4 | 2205 | 1 | 1 | 1 | 683.8425  |
| 40903  | 2 | 2 | 8.3  | 2918 | 1 | 1 | 1 | 808.4272  |
| 40903  | 2 | 2 | 8.3  | 3361 | 1 | 1 | 1 | 888.942   |
| 40630  | 4 | 4 | 12.7 | 791  | 1 | 1 | 1 | 500.7923  |
| 40630  | 4 | 4 | 12.7 | 1857 | 1 | 1 | 1 | 636.3562  |
| 40630  | 4 | 4 | 12.7 | 1926 | 1 | 1 | 1 | 643.3628  |
| 40630  | 4 | 4 | 12.7 | 2397 | 1 | 1 | 1 | 708.3851  |
| 52150  | 4 | 4 | 10.7 | 1129 | 1 | 1 | 1 | 544.7921  |
| 52150  | 4 | 4 | 10.7 | 1747 | 1 | 1 | 1 | 621.8216  |
| 52150  | 4 | 4 | 10.7 | 2578 | 1 | 1 | 1 | 741.9377  |
| 52150  | 4 | 4 | 10.7 | 3120 | 1 | 1 | 1 | 564.6138  |
| 148890 | 3 | 3 | 3.1  | 1116 | 1 | 1 | 1 | 543.8004  |
| 148890 | 3 | 3 | 3.1  | 2706 | 1 | 1 | 1 | 763.4565  |
| 148890 | 3 | 3 | 3.1  | 3871 | 1 | 1 | 1 | 971.0328  |
| 32586  | 3 | 3 | 14.4 | 2540 | 1 | 1 | 1 | 733.8852  |
| 32586  | 3 | 3 | 14.4 | 2813 | 1 | 1 | 1 | 784.8655  |
| 32586  | 3 | 3 | 14.4 | 3997 | 1 | 1 | 1 | 994.4968  |
| 57853  | 3 | 2 | 6.3  | 3301 | 1 | 1 | 1 | 879.9962  |
| 57853  | 3 | 2 | 6.3  | 4051 | 1 | 1 | 1 | 671.0555  |

|        |   |   |      |      |   |   |   |           |
|--------|---|---|------|------|---|---|---|-----------|
| 23969  | 5 | 5 | 24.8 | 564  | 1 | 1 | 0 | 472.7453  |
| 23969  | 5 | 5 | 24.8 | 963  | 1 | 1 | 1 | 522.3084  |
| 23969  | 5 | 5 | 24.8 | 1097 | 1 | 1 | 0 | 540.7878  |
| 23969  | 5 | 5 | 24.8 | 1629 | 1 | 1 | 1 | 605.8247  |
| 23969  | 5 | 5 | 24.8 | 2104 | 1 | 1 | 1 | 667.3795  |
| 51204  | 5 | 5 | 14   | 968  | 1 | 1 | 1 | 523.2706  |
| 51204  | 5 | 5 | 14   | 1024 | 1 | 1 | 1 | 531.7776  |
| 51204  | 5 | 5 | 14   | 1132 | 1 | 1 | 1 | 544.8268  |
| 51204  | 5 | 5 | 14   | 3114 | 1 | 1 | 1 | 845.4075  |
| 51204  | 5 | 5 | 14   | 4492 | 1 | 1 | 1 | 1100.5378 |
| 39436  | 3 | 3 | 11.3 | 1841 | 1 | 1 | 1 | 633.8746  |
| 39436  | 3 | 3 | 11.3 | 2670 | 1 | 1 | 1 | 757.4146  |
| 39436  | 3 | 3 | 11.3 | 3158 | 1 | 1 | 1 | 852.4235  |
| 94470  | 4 | 4 | 6.9  | 1760 | 1 | 1 | 1 | 622.8634  |
| 94470  | 4 | 4 | 6.9  | 2583 | 1 | 1 | 1 | 742.958   |
| 94470  | 4 | 4 | 6.9  | 3603 | 1 | 1 | 0 | 620.3172  |
| 94470  | 4 | 4 | 6.9  | 3970 | 1 | 1 | 1 | 988.9768  |
| 38472  | 3 | 3 | 11.1 | 596  | 1 | 1 | 1 | 476.7577  |
| 38472  | 3 | 3 | 11.1 | 2433 | 1 | 1 | 1 | 713.8854  |
| 38472  | 3 | 3 | 11.1 | 3306 | 1 | 1 | 1 | 880.954   |
| 114571 | 4 | 4 | 5.4  | 350  | 1 | 1 | 1 | 436.7454  |
| 114571 | 4 | 4 | 5.4  | 2692 | 1 | 1 | 1 | 760.3989  |
| 114571 | 4 | 4 | 5.4  | 2784 | 1 | 1 | 1 | 518.2824  |
| 114571 | 4 | 4 | 5.4  | 4226 | 1 | 1 | 1 | 697.3573  |
| 17358  | 2 | 2 | 27   | 4556 | 1 | 1 | 1 | 555.0277  |
| 17358  | 2 | 2 | 27   | 5234 | 1 | 1 | 1 | 1293.6444 |
| 17889  | 4 | 4 | 26.9 | 717  | 1 | 1 | 1 | 491.2922  |
| 17889  | 4 | 4 | 26.9 | 1036 | 1 | 1 | 1 | 533.2821  |
| 17889  | 4 | 4 | 26.9 | 1044 | 1 | 1 | 0 | 534.3136  |
| 17889  | 4 | 4 | 26.9 | 3316 | 1 | 1 | 1 | 882.4474  |
| 28210  | 5 | 5 | 22.3 | 78   | 1 | 0 | 0 | 378.2606  |
| 28210  | 5 | 5 | 22.3 | 104  | 1 | 0 | 0 | 387.7656  |
| 28210  | 5 | 5 | 22.3 | 1359 | 1 | 1 | 1 | 574.3089  |
| 28210  | 5 | 5 | 22.3 | 2654 | 1 | 0 | 0 | 753.8904  |
| 28210  | 5 | 5 | 22.3 | 5078 | 1 | 1 | 1 | 608.0713  |
| 82214  | 2 | 2 | 3.9  | 2132 | 1 | 1 | 1 | 671.385   |
| 82214  | 2 | 2 | 3.9  | 2955 | 1 | 1 | 1 | 816.4415  |
| 110942 | 5 | 5 | 7.2  | 1701 | 1 | 1 | 1 | 615.293   |
| 110942 | 5 | 5 | 7.2  | 1703 | 1 | 1 | 1 | 615.366   |
| 110942 | 5 | 5 | 7.2  | 2319 | 1 | 1 | 1 | 698.8695  |
| 110942 | 5 | 5 | 7.2  | 3712 | 1 | 1 | 1 | 943.9651  |
| 110942 | 5 | 5 | 7.2  | 3980 | 1 | 1 | 1 | 661.6809  |
| 62205  | 4 | 3 | 7.7  | 1812 | 1 | 1 | 1 | 629.3561  |
| 62205  | 4 | 3 | 7.7  | 1942 | 1 | 1 | 1 | 645.812   |
| 62205  | 4 | 3 | 7.7  | 4703 | 1 | 1 | 1 | 1125.6507 |
| 46359  | 4 | 3 | 14.7 | 3579 | 1 | 1 | 1 | 924.9879  |
| 46359  | 4 | 3 | 14.7 | 3686 | 1 | 1 | 1 | 627.5899  |
| 46359  | 4 | 3 | 14.7 | 5914 | 1 | 1 | 1 | 1047.5493 |
| 32499  | 3 | 3 | 15.4 | 548  | 1 | 1 | 1 | 470.7952  |
| 32499  | 3 | 3 | 15.4 | 4210 | 1 | 1 | 1 | 694.6494  |
| 32499  | 3 | 3 | 15.4 | 4476 | 1 | 1 | 1 | 1097.0177 |
| 45049  | 4 | 4 | 10.2 | 1012 | 1 | 1 | 1 | 529.3343  |
| 45049  | 4 | 4 | 10.2 | 1136 | 1 | 1 | 1 | 545.2792  |
| 45049  | 4 | 4 | 10.2 | 1282 | 1 | 1 | 1 | 564.8043  |
| 45049  | 4 | 4 | 10.2 | 1291 | 1 | 1 | 1 | 566.2853  |
| 16285  | 3 | 3 | 23.3 | 1001 | 1 | 1 | 1 | 527.7849  |
| 16285  | 3 | 3 | 23.3 | 1391 | 1 | 1 | 1 | 577.8296  |
| 16285  | 3 | 3 | 23.3 | 2482 | 1 | 1 | 1 | 722.3686  |

|        |   |   |      |      |   |   |   |           |
|--------|---|---|------|------|---|---|---|-----------|
| 15188  | 2 | 2 | 21.4 | 420  | 1 | 1 | 1 | 450.7609  |
| 15188  | 2 | 2 | 21.4 | 4037 | 1 | 1 | 1 | 1003.4876 |
| 71322  | 2 | 2 | 3.9  | 806  | 1 | 1 | 1 | 502.7981  |
| 71322  | 2 | 2 | 3.9  | 3691 | 1 | 1 | 1 | 941.4736  |
| 111275 | 2 | 2 | 3.5  | 2053 | 1 | 1 | 1 | 660.8165  |
| 111275 | 2 | 2 | 3.5  | 4956 | 1 | 1 | 1 | 787.0898  |
| 81345  | 2 | 2 | 5.3  | 2665 | 1 | 1 | 1 | 504.6192  |
| 81345  | 2 | 2 | 5.3  | 5262 | 1 | 1 | 1 | 876.7772  |
| 146599 | 6 | 6 | 6.8  | 1215 | 1 | 1 | 1 | 555.7563  |
| 146599 | 6 | 6 | 6.8  | 1397 | 1 | 1 | 1 | 578.8179  |
| 146599 | 6 | 6 | 6.8  | 1721 | 1 | 1 | 1 | 618.3225  |
| 146599 | 6 | 6 | 6.8  | 2074 | 1 | 1 | 1 | 663.3386  |
| 146599 | 6 | 6 | 6.8  | 2983 | 1 | 1 | 1 | 547.9241  |
| 146599 | 6 | 6 | 6.8  | 5829 | 1 | 1 | 1 | 1022.5644 |
| 47036  | 4 | 4 | 13.8 | 256  | 1 | 0 | 1 | 420.763   |
| 47036  | 4 | 4 | 13.8 | 1037 | 1 | 0 | 0 | 533.3025  |
| 47036  | 4 | 4 | 13.8 | 2480 | 1 | 0 | 0 | 722.3346  |
| 47036  | 4 | 4 | 13.8 | 6153 | 1 | 1 | 1 | 837.9299  |
| 119640 | 2 | 2 | 2.1  | 1328 | 1 | 1 | 1 | 570.3609  |
| 119640 | 2 | 2 | 2.1  | 2399 | 1 | 1 | 1 | 708.3986  |
| 8974   | 3 | 2 | 33.8 | 5259 | 1 | 1 | 1 | 876.3572  |
| 8974   | 3 | 2 | 33.8 | 5681 | 1 | 1 | 1 | 968.0789  |
| 114479 | 2 | 2 | 2.5  | 1207 | 1 | 1 | 1 | 553.8865  |
| 114479 | 2 | 2 | 2.5  | 3291 | 1 | 1 | 1 | 877.4907  |
| 574541 | 3 | 2 | 0.6  | 1810 | 1 | 1 | 1 | 628.8822  |
| 574541 | 3 | 2 | 0.6  | 4021 | 1 | 1 | 1 | 667.0459  |
| 50085  | 2 | 2 | 5.6  | 1603 | 1 | 1 | 1 | 602.3452  |
| 50085  | 2 | 2 | 5.6  | 2947 | 1 | 1 | 1 | 814.4113  |
| 82296  | 3 | 3 | 5.9  | 605  | 1 | 1 | 1 | 477.803   |
| 82296  | 3 | 3 | 5.9  | 1613 | 1 | 1 | 1 | 603.793   |
| 82296  | 3 | 3 | 5.9  | 4579 | 1 | 1 | 1 | 1111.0367 |
| 23729  | 2 | 2 | 11.7 | 1757 | 1 | 1 | 1 | 622.366   |
| 23729  | 2 | 2 | 11.7 | 2297 | 1 | 1 | 1 | 696.834   |
| 65730  | 2 | 2 | 4.6  | 2353 | 1 | 1 | 1 | 702.8335  |
| 65730  | 2 | 2 | 4.6  | 2391 | 1 | 1 | 1 | 706.8782  |
| 276563 | 3 | 3 | 1.6  | 549  | 1 | 1 | 1 | 470.813   |
| 276563 | 3 | 3 | 1.6  | 4340 | 1 | 1 | 1 | 714.0595  |
| 112934 | 2 | 2 | 3.9  | 1149 | 1 | 1 | 1 | 546.8064  |
| 112934 | 2 | 2 | 3.9  | 5841 | 1 | 1 | 1 | 1025.8601 |
| 406216 | 2 | 2 | 0.7  | 1927 | 1 | 1 | 1 | 643.3924  |
| 406216 | 2 | 2 | 0.7  | 2781 | 1 | 1 | 1 | 776.4607  |
| 88746  | 2 | 2 | 4.4  | 1570 | 1 | 1 | 1 | 598.3271  |
| 88746  | 2 | 2 | 4.4  | 5143 | 1 | 1 | 1 | 835.4184  |
| 114752 | 4 | 3 | 5    | 781  | 1 | 1 | 1 | 499.3113  |
| 114752 | 4 | 3 | 5    | 4407 | 1 | 1 | 1 | 1082.0629 |
| 114752 | 4 | 3 | 5    | 5222 | 1 | 1 | 1 | 1290.6574 |
| 73187  | 4 | 3 | 6.1  | 1263 | 1 | 1 | 1 | 562.2877  |
| 73187  | 4 | 3 | 6.1  | 1715 | 1 | 1 | 1 | 617.3514  |
| 73187  | 4 | 3 | 6.1  | 3695 | 1 | 1 | 1 | 941.5562  |
| 85715  | 2 | 2 | 3.1  | 1854 | 1 | 1 | 1 | 635.3924  |
| 85715  | 2 | 2 | 3.1  | 2318 | 1 | 1 | 1 | 698.853   |
| 20989  | 3 | 3 | 17.6 | 716  | 1 | 1 | 1 | 491.2619  |
| 20989  | 3 | 3 | 17.6 | 1198 | 1 | 0 | 1 | 553.2995  |
| 20989  | 3 | 3 | 17.6 | 2728 | 1 | 1 | 1 | 766.9187  |
| 42230  | 3 | 3 | 15.1 | 2437 | 1 | 1 | 1 | 714.4031  |
| 42230  | 3 | 3 | 15.1 | 2834 | 1 | 1 | 1 | 790.4077  |
| 42230  | 3 | 3 | 15.1 | 5986 | 1 | 1 | 1 | 1068.2311 |
| 25357  | 2 | 2 | 10.5 | 1392 | 1 | 1 | 1 | 577.8662  |

|        |   |   |      |      |   |   |   |           |
|--------|---|---|------|------|---|---|---|-----------|
| 25357  | 2 | 2 | 10.5 | 1872 | 1 | 1 | 1 | 638.3124  |
| 50224  | 2 | 2 | 7.4  | 2549 | 1 | 1 | 1 | 736.8969  |
| 50224  | 2 | 2 | 7.4  | 5046 | 1 | 1 | 1 | 803.1052  |
| 57427  | 2 | 2 | 4.8  | 1414 | 1 | 1 | 1 | 580.3761  |
| 57427  | 2 | 2 | 4.8  | 2266 | 1 | 1 | 1 | 691.892   |
| 24580  | 2 | 2 | 14.4 | 2592 | 1 | 1 | 1 | 745.4169  |
| 24580  | 2 | 2 | 14.4 | 4288 | 1 | 1 | 1 | 1062.5791 |
| 59860  | 2 | 2 | 5    | 1007 | 1 | 1 | 1 | 528.8062  |
| 59860  | 2 | 2 | 5    | 3255 | 1 | 1 | 1 | 870.9864  |
| 65767  | 4 | 4 | 10.9 | 712  | 1 | 1 | 1 | 490.7741  |
| 65767  | 4 | 4 | 10.9 | 1961 | 1 | 1 | 1 | 647.8339  |
| 65767  | 4 | 4 | 10.9 | 4001 | 1 | 1 | 1 | 663.6598  |
| 65767  | 4 | 4 | 10.9 | 5621 | 1 | 1 | 1 | 948.1675  |
| 34706  | 4 | 4 | 22.4 | 1071 | 1 | 1 | 1 | 537.319   |
| 34706  | 4 | 4 | 22.4 | 2107 | 1 | 1 | 1 | 668.3906  |
| 34706  | 4 | 4 | 22.4 | 3963 | 1 | 1 | 1 | 494.0387  |
| 34706  | 4 | 4 | 22.4 | 6051 | 1 | 1 | 1 | 822.7002  |
| 32980  | 3 | 3 | 13.3 | 1727 | 1 | 1 | 1 | 618.8712  |
| 32980  | 3 | 3 | 13.3 | 1739 | 1 | 1 | 0 | 620.8486  |
| 32980  | 3 | 3 | 13.3 | 3780 | 1 | 1 | 0 | 636.375   |
| 81286  | 3 | 3 | 6.2  | 1977 | 1 | 1 | 1 | 649.8816  |
| 81286  | 3 | 3 | 6.2  | 2429 | 1 | 1 | 1 | 713.4085  |
| 81286  | 3 | 3 | 6.2  | 4903 | 1 | 1 | 1 | 774.0747  |
| 14066  | 2 | 2 | 18.5 | 1416 | 1 | 1 | 1 | 580.8168  |
| 14066  | 2 | 2 | 18.5 | 1456 | 1 | 1 | 0 | 583.8063  |
| 60872  | 2 | 2 | 4    | 623  | 1 | 1 | 1 | 480.2746  |
| 60872  | 2 | 2 | 4    | 2800 | 1 | 1 | 1 | 782.3644  |
| 55031  | 2 | 2 | 4.6  | 2099 | 1 | 1 | 1 | 666.8321  |
| 55031  | 2 | 2 | 4.6  | 2504 | 1 | 1 | 0 | 725.8839  |
| 116128 | 3 | 2 | 3.4  | 3394 | 1 | 1 | 1 | 895.0215  |
| 116128 | 3 | 2 | 3.4  | 4515 | 1 | 1 | 1 | 735.7698  |
| 67813  | 2 | 2 | 3.6  | 1690 | 1 | 1 | 1 | 613.8583  |
| 67813  | 2 | 2 | 3.6  | 2209 | 1 | 1 | 0 | 684.8173  |
| 166282 | 3 | 3 | 2.3  | 1325 | 1 | 1 | 1 | 570.2933  |
| 166282 | 3 | 3 | 2.3  | 1482 | 1 | 1 | 1 | 587.3399  |
| 166282 | 3 | 3 | 2.3  | 3657 | 1 | 1 | 1 | 937.4276  |
| 43084  | 2 | 2 | 7.4  | 2846 | 1 | 1 | 1 | 792.9108  |
| 43084  | 2 | 2 | 7.4  | 2880 | 1 | 1 | 1 | 800.451   |
| 79562  | 3 | 2 | 4.6  | 2535 | 1 | 1 | 1 | 732.8616  |
| 79562  | 3 | 2 | 4.6  | 4978 | 1 | 1 | 1 | 791.3879  |
| 93099  | 3 | 3 | 4.3  | 1635 | 1 | 1 | 1 | 606.371   |
| 93099  | 3 | 3 | 4.3  | 1918 | 1 | 1 | 1 | 642.3224  |
| 93099  | 3 | 3 | 4.3  | 2953 | 1 | 1 | 1 | 815.9474  |
| 16590  | 3 | 2 | 15.2 | 4964 | 1 | 1 | 1 | 1182.1373 |
| 16590  | 3 | 2 | 15.2 | 5198 | 1 | 1 | 1 | 854.8044  |
| 45968  | 2 | 2 | 5.3  | 1080 | 1 | 1 | 1 | 538.2907  |
| 45968  | 2 | 2 | 5.3  | 2165 | 1 | 1 | 1 | 677.4212  |
| 39816  | 2 | 2 | 10.4 | 1421 | 1 | 1 | 1 | 580.8429  |
| 39816  | 2 | 2 | 10.4 | 5725 | 1 | 1 | 1 | 981.1838  |
| 53957  | 2 | 2 | 5.4  | 696  | 1 | 0 | 0 | 488.2844  |
| 53957  | 2 | 2 | 5.4  | 3903 | 1 | 1 | 1 | 975.5028  |
| 44614  | 3 | 3 | 9.4  | 1285 | 1 | 1 | 1 | 565.3219  |
| 44614  | 3 | 3 | 9.4  | 2658 | 1 | 1 | 1 | 754.3805  |
| 44368  | 3 | 3 | 11.4 | 2476 | 1 | 1 | 0 | 481.5901  |
| 44368  | 3 | 3 | 11.4 | 4326 | 1 | 1 | 1 | 1068.5414 |
| 29729  | 2 | 2 | 12.8 | 1048 | 1 | 1 | 1 | 534.7551  |
| 29729  | 2 | 2 | 12.8 | 5632 | 1 | 1 | 1 | 951.5047  |
| 53612  | 3 | 3 | 8.6  | 951  | 1 | 1 | 1 | 520.311   |

|        |   |   |      |      |   |   |   |           |
|--------|---|---|------|------|---|---|---|-----------|
| 53612  | 3 | 3 | 8.6  | 2064 | 1 | 1 | 1 | 662.3344  |
| 53612  | 3 | 3 | 8.6  | 4902 | 1 | 1 | 1 | 774.0714  |
| 20056  | 3 | 3 | 14.2 | 1121 | 1 | 1 | 1 | 544.2914  |
| 20056  | 3 | 3 | 14.2 | 1306 | 1 | 1 | 1 | 567.3318  |
| 28578  | 2 | 2 | 10.4 | 1186 | 1 | 1 | 1 | 552.2816  |
| 28578  | 2 | 2 | 10.4 | 3508 | 1 | 1 | 1 | 913.527   |
| 122979 | 2 | 2 | 1.9  | 719  | 1 | 1 | 1 | 491.7898  |
| 122979 | 2 | 2 | 1.9  | 1969 | 1 | 1 | 1 | 648.8848  |
| 65637  | 2 | 2 | 4.6  | 2181 | 1 | 1 | 1 | 679.8587  |
| 65637  | 2 | 2 | 4.6  | 3143 | 1 | 1 | 1 | 849.8912  |
| 41582  | 3 | 3 | 7.8  | 1337 | 1 | 1 | 1 | 571.2849  |
| 41582  | 3 | 3 | 7.8  | 1383 | 1 | 1 | 1 | 576.8016  |
| 41582  | 3 | 3 | 7.8  | 1587 | 1 | 1 | 1 | 601.319   |
| 44164  | 2 | 2 | 6.5  | 2367 | 1 | 1 | 1 | 704.3714  |
| 44164  | 2 | 2 | 6.5  | 2476 | 1 | 0 | 0 | 481.5901  |
| 33803  | 3 | 3 | 12.8 | 1739 | 1 | 0 | 0 | 620.8486  |
| 33803  | 3 | 3 | 12.8 | 1788 | 1 | 1 | 1 | 626.8685  |
| 33803  | 3 | 3 | 12.8 | 3780 | 1 | 0 | 0 | 636.375   |
| 58195  | 4 | 3 | 13.8 | 2217 | 1 | 1 | 1 | 457.5805  |
| 58195  | 4 | 3 | 13.8 | 5888 | 1 | 1 | 1 | 1038.8956 |
| 58195  | 4 | 3 | 13.8 | 6261 | 1 | 1 | 1 | 1150.6421 |
| 15174  | 2 | 2 | 18   | 850  | 1 | 1 | 1 | 507.2912  |
| 15174  | 2 | 2 | 18   | 3144 | 1 | 1 | 1 | 849.9149  |
| 14095  | 2 | 2 | 18.5 | 1357 | 1 | 1 | 1 | 573.8096  |
| 14095  | 2 | 2 | 18.5 | 1456 | 1 | 0 | 0 | 583.8063  |
| 27829  | 2 | 2 | 11.2 | 1180 | 1 | 1 | 1 | 551.3111  |
| 27829  | 2 | 2 | 11.2 | 4207 | 1 | 1 | 1 | 694.2908  |
| 53639  | 4 | 4 | 15.1 | 946  | 1 | 1 | 1 | 519.7878  |
| 53639  | 4 | 4 | 15.1 | 1161 | 1 | 1 | 1 | 548.302   |
| 53639  | 4 | 4 | 15.1 | 5261 | 1 | 1 | 1 | 876.7298  |
| 53639  | 4 | 4 | 15.1 | 5663 | 1 | 1 | 1 | 963.1275  |
| 17142  | 3 | 3 | 27.8 | 2259 | 1 | 1 | 1 | 461.2891  |
| 17142  | 3 | 3 | 27.8 | 2296 | 1 | 1 | 1 | 696.8191  |
| 17142  | 3 | 3 | 27.8 | 3798 | 1 | 1 | 1 | 639.3473  |
| 8231   | 2 | 2 | 34.8 | 1792 | 1 | 1 | 1 | 627.3377  |
| 8231   | 2 | 2 | 34.8 | 2830 | 1 | 1 | 1 | 789.8784  |
| 32865  | 2 | 2 | 6.1  | 536  | 1 | 1 | 1 | 468.2634  |
| 32865  | 2 | 2 | 6.1  | 1284 | 1 | 1 | 1 | 565.2928  |
| 38757  | 2 | 2 | 8    | 2498 | 1 | 1 | 1 | 483.9073  |
| 38757  | 2 | 2 | 8    | 3437 | 1 | 1 | 1 | 902.9832  |
| 68472  | 2 | 2 | 6.7  | 1657 | 1 | 1 | 1 | 609.3223  |
| 68472  | 2 | 2 | 6.7  | 5839 | 1 | 1 | 1 | 1025.5877 |
| 109365 | 3 | 3 | 3.7  | 1233 | 1 | 1 | 1 | 558.337   |
| 109365 | 3 | 3 | 3.7  | 1698 | 1 | 1 | 0 | 410.2314  |
| 109365 | 3 | 3 | 3.7  | 2910 | 1 | 1 | 0 | 538.6248  |
| 77313  | 2 | 2 | 3.1  | 1146 | 1 | 1 | 1 | 546.3085  |
| 77313  | 2 | 2 | 3.1  | 2350 | 1 | 1 | 1 | 702.3982  |
| 67827  | 2 | 2 | 3.7  | 1637 | 1 | 1 | 1 | 606.8504  |
| 67827  | 2 | 2 | 3.7  | 2209 | 1 | 0 | 0 | 684.8173  |
| 18045  | 2 | 2 | 16.9 | 1848 | 1 | 1 | 1 | 634.4025  |
| 18045  | 2 | 2 | 16.9 | 3108 | 1 | 1 | 1 | 563.2726  |
| 43105  | 2 | 2 | 7    | 2275 | 1 | 1 | 1 | 692.8927  |
| 43105  | 2 | 2 | 7    | 2517 | 1 | 1 | 1 | 728.8935  |
| 24005  | 3 | 3 | 15.2 | 564  | 1 | 0 | 0 | 472.7453  |
| 24005  | 3 | 3 | 15.2 | 1097 | 1 | 0 | 0 | 540.7878  |
| 24005  | 3 | 3 | 15.2 | 3238 | 1 | 1 | 1 | 578.3261  |
| 46504  | 2 | 2 | 8.2  | 775  | 1 | 1 | 1 | 498.3471  |
| 46504  | 2 | 2 | 8.2  | 5401 | 1 | 1 | 1 | 911.1412  |

|           |              |              |            |           |          |            |              |            |
|-----------|--------------|--------------|------------|-----------|----------|------------|--------------|------------|
| 97167     | 2            | 2            | 3.2        | 2095      | 1        | 1          | 1            | 666.3472   |
| 97167     | 2            | 2            | 3.2        | 3205      | 1        | 1          | 1            | 573.3657   |
| 93010     | 2            | 2            | 2.3        | 621       | 1        | 1          | 1            | 479.7696   |
| 93010     | 2            | 2            | 2.3        | 1082      | 1        | 1          | 1            | 538.7873   |
| 23079     | 3            | 3            | 22.7       | 981       | 1        | 1          | 1            | 524.2952   |
| 23079     | 3            | 3            | 22.7       | 2048      | 1        | 1          | 1            | 660.3607   |
| 23079     | 3            | 3            | 22.7       | 5726      | 1        | 1          | 1            | 981.5092   |
| 201443    | 2            | 2            | 1.4        | 1599      | 1        | 0          | 0            | 601.8483   |
| 201443    | 2            | 2            | 1.4        | 3234      | 1        | 1          | 1            | 865.9618   |
| 109254    | 3            | 3            | 3.6        | 1063      | 1        | 1          | 1            | 536.8294   |
| 109254    | 3            | 3            | 3.6        | 1698      | 1        | 0          | 0            | 410.2314   |
| 109254    | 3            | 3            | 3.6        | 2910      | 1        | 0          | 0            | 538.6248   |
| 36651     | 2            | 2            | 6.7        | 1112      | 1        | 1          | 1            | 543.3135   |
| 36651     | 2            | 2            | 6.7        | 1818      | 1        | 1          | 1            | 630.778    |
| 29708     | 3            | 3            | 15.7       | 617       | 1        | 1          | 1            | 479.2841   |
| 29708     | 3            | 3            | 15.7       | 1352      | 1        | 1          | 1            | 573.3026   |
| 29708     | 3            | 3            | 15.7       | 5652      | 1        | 1          | 1            | 1442.2201  |
| 40742     | 4            | 4            | 12.1       | 164       | 1        | 1          | 1            | 403.2324   |
| 40742     | 4            | 4            | 12.1       | 1065      | 1        | 1          | 1            | 537.2489   |
| 40742     | 4            | 4            | 12.1       | 1658      | 1        | 1          | 1            | 609.3479   |
| 40742     | 4            | 4            | 12.1       | 3083      | 1        | 1          | 1            | 560.6541   |
| 106684    | 2            | 2            | 2.5        | 5069      | 1        | 1          | 1            | 806.7425   |
| 106684    | 2            | 2            | 2.5        | 5215      | 1        | 1          | 1            | 858.7764   |
| 86221     | 2            | 2            | 4.6        | 2733      | 1        | 1          | 1            | 767.9347   |
| 86221     | 2            | 2            | 4.6        | 4969      | 1        | 1          | 1            | 789.8012   |
| 12741     | 2            | 2            | 17.4       | 677       | 1        | 1          | 1            | 486.2978   |
| 12741     | 2            | 2            | 17.4       | 1707      | 1        | 1          | 1            | 616.3131   |
| 55656     | 2            | 2            | 4.4        | 1953      | 1        | 1          | 0            | 647.3372   |
| 55656     | 2            | 2            | 4.4        | 2209      | 1        | 0          | 1            | 684.8173   |
| 43014     | 2            | 2            | 6.1        | 2191      | 1        | 1          | 1            | 681.8561   |
| 43014     | 2            | 2            | 6.1        | 2288      | 1        | 1          | 1            | 694.853    |
| 60657     | 2            | 2            | 3.5        | 480       | 1        | 1          | 1            | 459.2293   |
| 60657     | 2            | 2            | 3.5        | 1815      | 1        | 1          | 1            | 630.3332   |
| 62798     | 2            | 2            | 5.3        | 2617      | 1        | 1          | 1            | 750.9551   |
| 62798     | 2            | 2            | 5.3        | 3603      | 1        | 0          | 0            | 620.3172   |
| 67356     | 2            | 2            | 3.5        | 1218      | 1        | 1          | 1            | 555.8209   |
| 67356     | 2            | 2            | 3.5        | 1908      | 1        | 1          | 1            | 640.8478   |
| 15712     | 2            | 2            | 14.1       | 337       | 1        | 1          | 1            | 435.2817   |
| 15712     | 2            | 2            | 14.1       | 1487      | 1        | 1          | 1            | 587.8192   |
| 18698     | 2            | 2            | 23.2       | 1511      | 1        | 1          | 1            | 591.8297   |
| 18698     | 2            | 2            | 23.2       | 5846      | 1        | 1          | 1            | 1027.1821  |
| 12062     | 2            | 2            | 18.5       | 99        | 1        | 1          | 0            | 386.2341   |
| 12062     | 2            | 2            | 18.5       | 2698      | 1        | 1          | 1            | 508.5801   |
| 22104     | 2            | 2            | 15.8       | 587       | 1        | 1          | 1            | 475.7688   |
| 22104     | 2            | 2            | 15.8       | 4982      | 1        | 1          | 1            | 791.7383   |
| 92840     | 2            | 2            | 4.4        | 5496      | 1        | 1          | 1            | 925.8441   |
| 12046     | 2            | 2            | 18.5       | 99        | 1        | 0          | 0            | 386.2341   |
| 12046     | 2            | 2            | 18.5       | 2655      | 1        | 1          | 1            | 503.2484   |
| 143018    | 2            | 2            | 1.9        | 785       | 1        | 1          | 1            | 499.7973   |
| 143018    | 2            | 2            | 1.9        | 2986      | 1        | 1          | 1            | 822.4844   |
| prot_mass | prot_matches | prot_sequenc | prot_cover | pep_query | pep_rank | pep_isbold | pep_isunique | pep_exp_mz |
| 50361     | 47           | 25           | 82.7       | 571       | 1        | 1          | 1            | 488.7417   |
| 50361     | 47           | 25           | 82.7       | 758       | 1        | 1          | 0            | 514.2812   |
| 50361     | 47           | 25           | 82.7       | 883       | 1        | 1          | 0            | 533.2167   |
| 50361     | 47           | 25           | 82.7       | 1160      | 1        | 1          | 0            | 570.3502   |
| 50361     | 47           | 25           | 82.7       | 1189      | 1        | 1          | 0            | 573.7982   |
| 50361     | 47           | 25           | 82.7       | 1546      | 1        | 1          | 0            | 616.2921   |
| 50361     | 47           | 25           | 82.7       | 1704      | 1        | 1          | 0            | 637.8461   |

|       |    |    |      |      |   |   |   |           |
|-------|----|----|------|------|---|---|---|-----------|
| 50361 | 47 | 25 | 82.7 | 2050 | 1 | 1 | 0 | 686.3451  |
| 50361 | 47 | 25 | 82.7 | 2281 | 1 | 1 | 0 | 717.8268  |
| 50361 | 47 | 25 | 82.7 | 2417 | 1 | 1 | 1 | 739.8338  |
| 50361 | 47 | 25 | 82.7 | 2761 | 1 | 1 | 0 | 811.9293  |
| 50361 | 47 | 25 | 82.7 | 2903 | 1 | 1 | 0 | 840.4018  |
| 50361 | 47 | 25 | 82.7 | 2953 | 1 | 1 | 0 | 848.9203  |
| 50361 | 47 | 25 | 82.7 | 3273 | 1 | 1 | 1 | 907.957   |
| 50361 | 47 | 25 | 82.7 | 3289 | 1 | 1 | 0 | 911.9651  |
| 50361 | 47 | 25 | 82.7 | 3623 | 1 | 1 | 0 | 976.4474  |
| 50361 | 47 | 25 | 82.7 | 3673 | 1 | 1 | 0 | 987.0014  |
| 50361 | 47 | 25 | 82.7 | 3943 | 1 | 1 | 0 | 1051.0485 |
| 50361 | 47 | 25 | 82.7 | 3958 | 1 | 1 | 0 | 704.3593  |
| 50361 | 47 | 25 | 82.7 | 4693 | 1 | 1 | 0 | 1184.0663 |
| 50361 | 47 | 25 | 82.7 | 5232 | 1 | 1 | 0 | 922.1115  |
| 50361 | 47 | 25 | 82.7 | 5303 | 1 | 1 | 0 | 933.45    |
| 50361 | 47 | 25 | 82.7 | 5807 | 1 | 1 | 1 | 801.1239  |
| 50361 | 47 | 25 | 82.7 | 5936 | 1 | 1 | 1 | 1109.5066 |
| 50361 | 47 | 25 | 82.7 | 6636 | 1 | 1 | 0 | 1525.377  |
| 50310 | 44 | 23 | 77   | 758  | 1 | 0 | 0 | 514.2812  |
| 50310 | 44 | 23 | 77   | 883  | 1 | 0 | 0 | 533.2167  |
| 50310 | 44 | 23 | 77   | 1160 | 1 | 0 | 0 | 570.3502  |
| 50310 | 44 | 23 | 77   | 1189 | 1 | 0 | 0 | 573.7982  |
| 50310 | 44 | 23 | 77   | 1546 | 1 | 0 | 0 | 616.2921  |
| 50310 | 44 | 23 | 77   | 1704 | 1 | 0 | 0 | 637.8461  |
| 50310 | 44 | 23 | 77   | 1783 | 1 | 1 | 1 | 649.8221  |
| 50310 | 44 | 23 | 77   | 2050 | 1 | 0 | 0 | 686.3451  |
| 50310 | 44 | 23 | 77   | 2281 | 1 | 0 | 0 | 717.8268  |
| 50310 | 44 | 23 | 77   | 2761 | 1 | 0 | 0 | 811.9293  |
| 50310 | 44 | 23 | 77   | 2903 | 1 | 0 | 0 | 840.4018  |
| 50310 | 44 | 23 | 77   | 2953 | 1 | 0 | 0 | 848.9203  |
| 50310 | 44 | 23 | 77   | 3289 | 1 | 0 | 0 | 911.9651  |
| 50310 | 44 | 23 | 77   | 3623 | 1 | 0 | 0 | 976.4474  |
| 50310 | 44 | 23 | 77   | 3673 | 1 | 0 | 0 | 987.0014  |
| 50310 | 44 | 23 | 77   | 3943 | 1 | 0 | 0 | 1051.0485 |
| 50310 | 44 | 23 | 77   | 3958 | 1 | 0 | 0 | 704.3593  |
| 50310 | 44 | 23 | 77   | 4693 | 1 | 0 | 0 | 1184.0663 |
| 50310 | 44 | 23 | 77   | 5232 | 1 | 0 | 0 | 922.1115  |
| 50310 | 44 | 23 | 77   | 5303 | 1 | 0 | 0 | 933.45    |
| 50310 | 44 | 23 | 77   | 5756 | 1 | 1 | 1 | 1051.1345 |
| 50310 | 44 | 23 | 77   | 6105 | 1 | 1 | 0 | 1133.839  |
| 50310 | 44 | 23 | 77   | 6636 | 1 | 0 | 0 | 1525.377  |
| 51385 | 48 | 25 | 78   | 883  | 1 | 0 | 0 | 533.2167  |
| 51385 | 48 | 25 | 78   | 1160 | 1 | 0 | 0 | 570.3502  |
| 51385 | 48 | 25 | 78   | 1189 | 1 | 0 | 0 | 573.7982  |
| 51385 | 48 | 25 | 78   | 1546 | 1 | 0 | 0 | 616.2921  |
| 51385 | 48 | 25 | 78   | 1704 | 1 | 0 | 0 | 637.8461  |
| 51385 | 48 | 25 | 78   | 1752 | 1 | 1 | 0 | 644.3341  |
| 51385 | 48 | 25 | 78   | 1779 | 1 | 1 | 1 | 648.8075  |
| 51385 | 48 | 25 | 78   | 2050 | 1 | 0 | 0 | 686.3451  |
| 51385 | 48 | 25 | 78   | 2108 | 1 | 1 | 0 | 692.8545  |
| 51385 | 48 | 25 | 78   | 2317 | 1 | 1 | 1 | 723.3276  |
| 51385 | 48 | 25 | 78   | 2324 | 1 | 1 | 0 | 723.8478  |
| 51385 | 48 | 25 | 78   | 2761 | 1 | 0 | 0 | 811.9293  |
| 51385 | 48 | 25 | 78   | 2903 | 1 | 0 | 0 | 840.4018  |
| 51385 | 48 | 25 | 78   | 2953 | 1 | 0 | 0 | 848.9203  |
| 51385 | 48 | 25 | 78   | 3184 | 1 | 1 | 1 | 889.9353  |
| 51385 | 48 | 25 | 78   | 3289 | 1 | 0 | 0 | 911.9651  |
| 51385 | 48 | 25 | 78   | 3411 | 1 | 1 | 1 | 936.9381  |

|       |    |    |      |      |   |   |   |           |
|-------|----|----|------|------|---|---|---|-----------|
| 51385 | 48 | 25 | 78   | 3623 | 1 | 0 | 0 | 976.4474  |
| 51385 | 48 | 25 | 78   | 3673 | 1 | 0 | 0 | 987.0014  |
| 51385 | 48 | 25 | 78   | 3943 | 1 | 0 | 0 | 1051.0485 |
| 51385 | 48 | 25 | 78   | 3958 | 1 | 0 | 0 | 704.3593  |
| 51385 | 48 | 25 | 78   | 5208 | 1 | 1 | 0 | 917.7797  |
| 51385 | 48 | 25 | 78   | 5315 | 1 | 1 | 1 | 934.7714  |
| 51385 | 48 | 25 | 78   | 6105 | 1 | 0 | 0 | 1133.839  |
| 51385 | 48 | 25 | 78   | 6636 | 1 | 0 | 0 | 1525.377  |
| 51341 | 47 | 23 | 73.9 | 883  | 1 | 0 | 0 | 533.2167  |
| 51341 | 47 | 23 | 73.9 | 1160 | 1 | 0 | 0 | 570.3502  |
| 51341 | 47 | 23 | 73.9 | 1189 | 1 | 0 | 0 | 573.7982  |
| 51341 | 47 | 23 | 73.9 | 1546 | 1 | 0 | 0 | 616.2921  |
| 51341 | 47 | 23 | 73.9 | 1704 | 1 | 0 | 0 | 637.8461  |
| 51341 | 47 | 23 | 73.9 | 1752 | 1 | 0 | 0 | 644.3341  |
| 51341 | 47 | 23 | 73.9 | 1823 | 1 | 1 | 1 | 654.8248  |
| 51341 | 47 | 23 | 73.9 | 2050 | 1 | 0 | 0 | 686.3451  |
| 51341 | 47 | 23 | 73.9 | 2273 | 1 | 1 | 0 | 716.3194  |
| 51341 | 47 | 23 | 73.9 | 2281 | 1 | 0 | 0 | 717.8268  |
| 51341 | 47 | 23 | 73.9 | 2324 | 1 | 0 | 0 | 723.8478  |
| 51341 | 47 | 23 | 73.9 | 2761 | 1 | 0 | 0 | 811.9293  |
| 51341 | 47 | 23 | 73.9 | 2782 | 1 | 1 | 0 | 817.4     |
| 51341 | 47 | 23 | 73.9 | 2953 | 1 | 0 | 0 | 848.9203  |
| 51341 | 47 | 23 | 73.9 | 3174 | 1 | 1 | 1 | 887.4466  |
| 51341 | 47 | 23 | 73.9 | 3512 | 1 | 1 | 1 | 950.4707  |
| 51341 | 47 | 23 | 73.9 | 3623 | 1 | 0 | 0 | 976.4474  |
| 51341 | 47 | 23 | 73.9 | 3673 | 1 | 0 | 0 | 987.0014  |
| 51341 | 47 | 23 | 73.9 | 3943 | 1 | 0 | 0 | 1051.0485 |
| 51341 | 47 | 23 | 73.9 | 5173 | 1 | 1 | 1 | 913.1083  |
| 51341 | 47 | 23 | 73.9 | 5348 | 1 | 1 | 0 | 938.7834  |
| 51341 | 47 | 23 | 73.9 | 6105 | 1 | 0 | 0 | 1133.839  |
| 51341 | 47 | 23 | 73.9 | 6636 | 1 | 0 | 0 | 1525.377  |
| 51258 | 46 | 23 | 71.3 | 883  | 1 | 0 | 0 | 533.2167  |
| 51258 | 46 | 23 | 71.3 | 1160 | 1 | 0 | 0 | 570.3502  |
| 51258 | 46 | 23 | 71.3 | 1189 | 1 | 0 | 0 | 573.7982  |
| 51258 | 46 | 23 | 71.3 | 1546 | 1 | 0 | 0 | 616.2921  |
| 51258 | 46 | 23 | 71.3 | 1704 | 1 | 0 | 0 | 637.8461  |
| 51258 | 46 | 23 | 71.3 | 1752 | 1 | 0 | 0 | 644.3341  |
| 51258 | 46 | 23 | 71.3 | 2023 | 1 | 1 | 1 | 682.8256  |
| 51258 | 46 | 23 | 71.3 | 2050 | 1 | 0 | 0 | 686.3451  |
| 51258 | 46 | 23 | 71.3 | 2108 | 1 | 0 | 0 | 692.8545  |
| 51258 | 46 | 23 | 71.3 | 2273 | 1 | 0 | 0 | 716.3194  |
| 51258 | 46 | 23 | 71.3 | 2324 | 1 | 0 | 0 | 723.8478  |
| 51258 | 46 | 23 | 71.3 | 2761 | 1 | 0 | 0 | 811.9293  |
| 51258 | 46 | 23 | 71.3 | 2782 | 1 | 0 | 0 | 817.4     |
| 51258 | 46 | 23 | 71.3 | 2953 | 1 | 0 | 0 | 848.9203  |
| 51258 | 46 | 23 | 71.3 | 3289 | 1 | 0 | 0 | 911.9651  |
| 51258 | 46 | 23 | 71.3 | 3623 | 1 | 0 | 0 | 976.4474  |
| 51258 | 46 | 23 | 71.3 | 3673 | 1 | 0 | 0 | 987.0014  |
| 51258 | 46 | 23 | 71.3 | 3943 | 1 | 0 | 0 | 1051.0485 |
| 51258 | 46 | 23 | 71.3 | 3958 | 1 | 0 | 0 | 704.3593  |
| 51258 | 46 | 23 | 71.3 | 5208 | 1 | 0 | 0 | 917.7797  |
| 51258 | 46 | 23 | 71.3 | 5348 | 1 | 0 | 0 | 938.7834  |
| 51258 | 46 | 23 | 71.3 | 6105 | 1 | 0 | 0 | 1133.839  |
| 51258 | 46 | 23 | 71.3 | 6636 | 1 | 0 | 0 | 1525.377  |
| 50191 | 36 | 21 | 68   | 374  | 1 | 1 | 0 | 455.2551  |
| 50191 | 36 | 21 | 68   | 608  | 1 | 1 | 0 | 494.2771  |
| 50191 | 36 | 21 | 68   | 1741 | 1 | 1 | 0 | 642.2554  |
| 50191 | 36 | 21 | 68   | 2086 | 1 | 1 | 0 | 460.9039  |

|       |    |    |      |      |   |   |   |           |
|-------|----|----|------|------|---|---|---|-----------|
| 50191 | 36 | 21 | 68   | 2403 | 1 | 1 | 0 | 737.4354  |
| 50191 | 36 | 21 | 68   | 2710 | 1 | 1 | 0 | 799.8872  |
| 50191 | 36 | 21 | 68   | 2941 | 1 | 1 | 1 | 845.9466  |
| 50191 | 36 | 21 | 68   | 3005 | 1 | 1 | 0 | 858.464   |
| 50191 | 36 | 21 | 68   | 3206 | 1 | 1 | 0 | 896.9679  |
| 50191 | 36 | 21 | 68   | 3374 | 1 | 1 | 0 | 929.4445  |
| 50191 | 36 | 21 | 68   | 3459 | 1 | 1 | 0 | 943.4767  |
| 50191 | 36 | 21 | 68   | 3474 | 1 | 1 | 0 | 630.3239  |
| 50191 | 36 | 21 | 68   | 3684 | 1 | 1 | 0 | 989.4444  |
| 50191 | 36 | 21 | 68   | 4478 | 1 | 1 | 0 | 760.7332  |
| 50191 | 36 | 21 | 68   | 4642 | 1 | 1 | 0 | 782.6753  |
| 50191 | 36 | 21 | 68   | 4727 | 1 | 1 | 0 | 1193.1    |
| 50191 | 36 | 21 | 68   | 4741 | 1 | 1 | 0 | 1198.0992 |
| 50191 | 36 | 21 | 68   | 4875 | 1 | 1 | 0 | 834.7083  |
| 50191 | 36 | 21 | 68   | 5033 | 1 | 1 | 0 | 881.0812  |
| 50191 | 36 | 21 | 68   | 5790 | 1 | 1 | 0 | 1065.2144 |
| 50191 | 36 | 21 | 68   | 5923 | 1 | 1 | 0 | 1107.9138 |
| 50194 | 36 | 21 | 68   | 374  | 1 | 0 | 0 | 455.2551  |
| 50194 | 36 | 21 | 68   | 608  | 1 | 0 | 0 | 494.2771  |
| 50194 | 36 | 21 | 68   | 1741 | 1 | 0 | 0 | 642.2554  |
| 50194 | 36 | 21 | 68   | 2086 | 1 | 0 | 0 | 460.9039  |
| 50194 | 36 | 21 | 68   | 2403 | 1 | 0 | 0 | 737.4354  |
| 50194 | 36 | 21 | 68   | 2710 | 1 | 0 | 0 | 799.8872  |
| 50194 | 36 | 21 | 68   | 2861 | 1 | 1 | 1 | 832.4403  |
| 50194 | 36 | 21 | 68   | 3005 | 1 | 0 | 0 | 858.464   |
| 50194 | 36 | 21 | 68   | 3206 | 1 | 0 | 0 | 896.9679  |
| 50194 | 36 | 21 | 68   | 3374 | 1 | 0 | 0 | 929.4445  |
| 50194 | 36 | 21 | 68   | 3459 | 1 | 0 | 0 | 943.4767  |
| 50194 | 36 | 21 | 68   | 3474 | 1 | 0 | 0 | 630.3239  |
| 50194 | 36 | 21 | 68   | 3684 | 1 | 0 | 0 | 989.4444  |
| 50194 | 36 | 21 | 68   | 4478 | 1 | 0 | 0 | 760.7332  |
| 50194 | 36 | 21 | 68   | 4642 | 1 | 0 | 0 | 782.6753  |
| 50194 | 36 | 21 | 68   | 4727 | 1 | 0 | 0 | 1193.1    |
| 50194 | 36 | 21 | 68   | 4741 | 1 | 0 | 0 | 1198.0992 |
| 50194 | 36 | 21 | 68   | 4875 | 1 | 0 | 0 | 834.7083  |
| 50194 | 36 | 21 | 68   | 5033 | 1 | 0 | 0 | 881.0812  |
| 50194 | 36 | 21 | 68   | 5790 | 1 | 0 | 0 | 1065.2144 |
| 50194 | 36 | 21 | 68   | 5923 | 1 | 0 | 0 | 1107.9138 |
| 47075 | 30 | 17 | 60.9 | 336  | 1 | 1 | 0 | 447.7412  |
| 47075 | 30 | 17 | 60.9 | 510  | 1 | 1 | 0 | 479.7639  |
| 47075 | 30 | 17 | 60.9 | 1077 | 1 | 1 | 0 | 557.8452  |
| 47075 | 30 | 17 | 60.9 | 1175 | 1 | 1 | 0 | 571.7899  |
| 47075 | 30 | 17 | 60.9 | 1925 | 1 | 1 | 1 | 668.8094  |
| 47075 | 30 | 17 | 60.9 | 2171 | 1 | 1 | 0 | 701.3698  |
| 47075 | 30 | 17 | 60.9 | 2325 | 1 | 1 | 1 | 724.3792  |
| 47075 | 30 | 17 | 60.9 | 2480 | 1 | 1 | 0 | 751.9429  |
| 47075 | 30 | 17 | 60.9 | 2652 | 1 | 1 | 1 | 788.4282  |
| 47075 | 30 | 17 | 60.9 | 2692 | 1 | 1 | 0 | 794.3545  |
| 47075 | 30 | 17 | 60.9 | 3299 | 1 | 1 | 0 | 914.4722  |
| 47075 | 30 | 17 | 60.9 | 3556 | 1 | 1 | 0 | 961.006   |
| 47075 | 30 | 17 | 60.9 | 3792 | 1 | 1 | 0 | 676.6362  |
| 47075 | 30 | 17 | 60.9 | 3885 | 1 | 1 | 0 | 1038.0451 |
| 47075 | 30 | 17 | 60.9 | 5119 | 1 | 1 | 0 | 1350.2018 |
| 47075 | 30 | 17 | 60.9 | 5493 | 1 | 1 | 0 | 965.8377  |
| 47075 | 30 | 17 | 60.9 | 5734 | 1 | 1 | 1 | 1569.3091 |
| 46960 | 30 | 17 | 60.2 | 336  | 1 | 0 | 0 | 447.7412  |
| 46960 | 30 | 17 | 60.2 | 443  | 1 | 1 | 1 | 468.2632  |
| 46960 | 30 | 17 | 60.2 | 510  | 1 | 0 | 0 | 479.7639  |

|        |    |    |      |      |   |   |   |           |
|--------|----|----|------|------|---|---|---|-----------|
| 46960  | 30 | 17 | 60.2 | 573  | 1 | 1 | 1 | 488.7824  |
| 46960  | 30 | 17 | 60.2 | 1041 | 1 | 1 | 1 | 552.8296  |
| 46960  | 30 | 17 | 60.2 | 1077 | 1 | 0 | 0 | 557.8452  |
| 46960  | 30 | 17 | 60.2 | 1175 | 1 | 0 | 0 | 571.7899  |
| 46960  | 30 | 17 | 60.2 | 2171 | 1 | 0 | 0 | 701.3698  |
| 46960  | 30 | 17 | 60.2 | 2480 | 1 | 0 | 0 | 751.9429  |
| 46960  | 30 | 17 | 60.2 | 2692 | 1 | 0 | 0 | 794.3545  |
| 46960  | 30 | 17 | 60.2 | 3299 | 1 | 0 | 0 | 914.4722  |
| 46960  | 30 | 17 | 60.2 | 3556 | 1 | 0 | 0 | 961.006   |
| 46960  | 30 | 17 | 60.2 | 3792 | 1 | 0 | 0 | 676.6362  |
| 46960  | 30 | 17 | 60.2 | 3885 | 1 | 0 | 0 | 1038.0451 |
| 46960  | 30 | 17 | 60.2 | 5119 | 1 | 0 | 0 | 1350.2018 |
| 46960  | 30 | 17 | 60.2 | 5493 | 1 | 0 | 0 | 965.8377  |
| 46960  | 30 | 17 | 60.2 | 6306 | 1 | 1 | 1 | 1292.9231 |
| 50250  | 31 | 19 | 58.9 | 374  | 1 | 0 | 0 | 455.2551  |
| 50250  | 31 | 19 | 58.9 | 608  | 1 | 0 | 0 | 494.2771  |
| 50250  | 31 | 19 | 58.9 | 1741 | 1 | 0 | 0 | 642.2554  |
| 50250  | 31 | 19 | 58.9 | 2086 | 1 | 0 | 0 | 460.9039  |
| 50250  | 31 | 19 | 58.9 | 2542 | 1 | 1 | 1 | 766.4564  |
| 50250  | 31 | 19 | 58.9 | 2679 | 1 | 1 | 1 | 792.8792  |
| 50250  | 31 | 19 | 58.9 | 2945 | 1 | 1 | 1 | 846.4385  |
| 50250  | 31 | 19 | 58.9 | 3005 | 1 | 0 | 0 | 858.464   |
| 50250  | 31 | 19 | 58.9 | 3060 | 1 | 1 | 1 | 867.9657  |
| 50250  | 31 | 19 | 58.9 | 3406 | 1 | 1 | 0 | 934.9518  |
| 50250  | 31 | 19 | 58.9 | 3459 | 1 | 0 | 0 | 943.4767  |
| 50250  | 31 | 19 | 58.9 | 4478 | 1 | 0 | 0 | 760.7332  |
| 50250  | 31 | 19 | 58.9 | 4642 | 1 | 0 | 0 | 782.6753  |
| 50250  | 31 | 19 | 58.9 | 4727 | 1 | 0 | 0 | 1193.1    |
| 50250  | 31 | 19 | 58.9 | 4875 | 1 | 0 | 0 | 834.7083  |
| 50250  | 31 | 19 | 58.9 | 5111 | 1 | 1 | 1 | 899.0961  |
| 50250  | 31 | 19 | 58.9 | 5790 | 1 | 0 | 0 | 1065.2144 |
| 50250  | 31 | 19 | 58.9 | 5923 | 1 | 0 | 0 | 1107.9138 |
| 51883  | 24 | 14 | 43.7 | 1011 | 1 | 1 | 1 | 548.3262  |
| 51883  | 24 | 14 | 43.7 | 1121 | 1 | 1 | 1 | 565.3265  |
| 51883  | 24 | 14 | 43.7 | 1238 | 1 | 1 | 1 | 579.3281  |
| 51883  | 24 | 14 | 43.7 | 2126 | 1 | 1 | 1 | 695.3387  |
| 51883  | 24 | 14 | 43.7 | 2290 | 1 | 1 | 1 | 718.3381  |
| 51883  | 24 | 14 | 43.7 | 2918 | 1 | 1 | 1 | 841.4764  |
| 51883  | 24 | 14 | 43.7 | 3165 | 1 | 1 | 0 | 590.2665  |
| 51883  | 24 | 14 | 43.7 | 3256 | 1 | 1 | 1 | 905.9432  |
| 51883  | 24 | 14 | 43.7 | 3262 | 1 | 1 | 1 | 906.9894  |
| 51883  | 24 | 14 | 43.7 | 3564 | 1 | 1 | 1 | 962.0271  |
| 51883  | 24 | 14 | 43.7 | 3965 | 1 | 1 | 1 | 1057.5285 |
| 51883  | 24 | 14 | 43.7 | 4025 | 1 | 1 | 1 | 1075.0803 |
| 51883  | 24 | 14 | 43.7 | 5656 | 1 | 1 | 1 | 1018.2059 |
| 51883  | 24 | 14 | 43.7 | 6174 | 1 | 1 | 1 | 1718.3735 |
| 105902 | 37 | 29 | 41.2 | 144  | 1 | 1 | 1 | 399.7635  |
| 105902 | 37 | 29 | 41.2 | 559  | 1 | 1 | 1 | 486.7773  |
| 105902 | 37 | 29 | 41.2 | 800  | 1 | 1 | 0 | 519.768   |
| 105902 | 37 | 29 | 41.2 | 845  | 1 | 1 | 1 | 525.7698  |
| 105902 | 37 | 29 | 41.2 | 1087 | 1 | 1 | 0 | 558.799   |
| 105902 | 37 | 29 | 41.2 | 1242 | 1 | 1 | 0 | 579.8216  |
| 105902 | 37 | 29 | 41.2 | 1247 | 1 | 1 | 0 | 580.3006  |
| 105902 | 37 | 29 | 41.2 | 1306 | 1 | 1 | 0 | 587.2494  |
| 105902 | 37 | 29 | 41.2 | 1451 | 1 | 1 | 0 | 403.219   |
| 105902 | 37 | 29 | 41.2 | 1667 | 1 | 1 | 1 | 632.7713  |
| 105902 | 37 | 29 | 41.2 | 1840 | 1 | 1 | 0 | 657.8717  |
| 105902 | 37 | 29 | 41.2 | 1859 | 1 | 1 | 1 | 440.5776  |

|        |    |    |      |      |   |   |   |           |
|--------|----|----|------|------|---|---|---|-----------|
| 105902 | 37 | 29 | 41.2 | 2099 | 1 | 1 | 0 | 691.8849  |
| 105902 | 37 | 29 | 41.2 | 2161 | 1 | 1 | 0 | 699.3723  |
| 105902 | 37 | 29 | 41.2 | 2206 | 1 | 1 | 1 | 706.328   |
| 105902 | 37 | 29 | 41.2 | 2412 | 1 | 1 | 0 | 738.8952  |
| 105902 | 37 | 29 | 41.2 | 2461 | 1 | 1 | 0 | 748.8686  |
| 105902 | 37 | 29 | 41.2 | 2942 | 1 | 1 | 0 | 846.4088  |
| 105902 | 37 | 29 | 41.2 | 3486 | 1 | 1 | 1 | 946.5274  |
| 105902 | 37 | 29 | 41.2 | 3709 | 1 | 1 | 0 | 662.6571  |
| 105902 | 37 | 29 | 41.2 | 3805 | 1 | 1 | 0 | 1017.0684 |
| 105902 | 37 | 29 | 41.2 | 4338 | 1 | 1 | 1 | 751.0372  |
| 105902 | 37 | 29 | 41.2 | 4409 | 1 | 1 | 0 | 1132.5789 |
| 105902 | 37 | 29 | 41.2 | 4745 | 1 | 1 | 0 | 799.765   |
| 105902 | 37 | 29 | 41.2 | 4864 | 1 | 1 | 1 | 831.1349  |
| 105902 | 37 | 29 | 41.2 | 4883 | 1 | 1 | 0 | 836.7988  |
| 105902 | 37 | 29 | 41.2 | 5069 | 1 | 1 | 0 | 666.8758  |
| 105902 | 37 | 29 | 41.2 | 5898 | 1 | 1 | 1 | 1103.5394 |
| 105902 | 37 | 29 | 41.2 | 6286 | 1 | 1 | 0 | 1273.0234 |
| 51237  | 30 | 19 | 59.2 | 664  | 1 | 1 | 1 | 502.745   |
| 51237  | 30 | 19 | 59.2 | 883  | 1 | 0 | 0 | 533.2167  |
| 51237  | 30 | 19 | 59.2 | 1160 | 1 | 0 | 0 | 570.3502  |
| 51237  | 30 | 19 | 59.2 | 1189 | 1 | 0 | 0 | 573.7982  |
| 51237  | 30 | 19 | 59.2 | 1546 | 1 | 0 | 0 | 616.2921  |
| 51237  | 30 | 19 | 59.2 | 1704 | 1 | 0 | 0 | 637.8461  |
| 51237  | 30 | 19 | 59.2 | 1768 | 1 | 1 | 1 | 647.3255  |
| 51237  | 30 | 19 | 59.2 | 2050 | 1 | 0 | 0 | 686.3451  |
| 51237  | 30 | 19 | 59.2 | 2108 | 1 | 0 | 0 | 692.8545  |
| 51237  | 30 | 19 | 59.2 | 2273 | 1 | 0 | 0 | 716.3194  |
| 51237  | 30 | 19 | 59.2 | 2324 | 1 | 0 | 0 | 723.8478  |
| 51237  | 30 | 19 | 59.2 | 2761 | 1 | 0 | 0 | 811.9293  |
| 51237  | 30 | 19 | 59.2 | 2953 | 1 | 0 | 0 | 848.9203  |
| 51237  | 30 | 19 | 59.2 | 3630 | 1 | 1 | 0 | 979.0052  |
| 51237  | 30 | 19 | 59.2 | 3909 | 1 | 1 | 0 | 695.7039  |
| 51237  | 30 | 19 | 59.2 | 5208 | 1 | 0 | 0 | 917.7797  |
| 51237  | 30 | 19 | 59.2 | 5369 | 1 | 0 | 1 | 943.4544  |
| 51237  | 30 | 19 | 59.2 | 6105 | 1 | 0 | 0 | 1133.839  |
| 51237  | 30 | 19 | 59.2 | 6636 | 1 | 0 | 0 | 1525.377  |
| 71712  | 30 | 20 | 44.5 | 1480 | 1 | 1 | 0 | 608.3295  |
| 71712  | 30 | 20 | 44.5 | 1533 | 1 | 1 | 0 | 614.817   |
| 71712  | 30 | 20 | 44.5 | 1544 | 1 | 1 | 1 | 615.7684  |
| 71712  | 30 | 20 | 44.5 | 1720 | 1 | 1 | 0 | 639.8182  |
| 71712  | 30 | 20 | 44.5 | 1837 | 1 | 1 | 0 | 657.3134  |
| 71712  | 30 | 20 | 44.5 | 2000 | 1 | 1 | 0 | 679.8111  |
| 71712  | 30 | 20 | 44.5 | 2114 | 1 | 1 | 0 | 693.8697  |
| 71712  | 30 | 20 | 44.5 | 2262 | 1 | 1 | 1 | 713.8856  |
| 71712  | 30 | 20 | 44.5 | 2399 | 1 | 1 | 0 | 737.3462  |
| 71712  | 30 | 20 | 44.5 | 2568 | 1 | 1 | 0 | 770.882   |
| 71712  | 30 | 20 | 44.5 | 2844 | 1 | 1 | 0 | 830.4508  |
| 71712  | 30 | 20 | 44.5 | 2858 | 1 | 1 | 0 | 832.4077  |
| 71712  | 30 | 20 | 44.5 | 2885 | 1 | 1 | 0 | 838.3679  |
| 71712  | 30 | 20 | 44.5 | 2907 | 1 | 1 | 0 | 840.9203  |
| 71712  | 30 | 20 | 44.5 | 3197 | 1 | 1 | 0 | 894.4982  |
| 71712  | 30 | 20 | 44.5 | 3659 | 1 | 1 | 0 | 984.0059  |
| 71712  | 30 | 20 | 44.5 | 4936 | 1 | 1 | 1 | 1280.6304 |
| 71712  | 30 | 20 | 44.5 | 5052 | 1 | 1 | 0 | 1329.6369 |
| 71712  | 30 | 20 | 44.5 | 5636 | 1 | 1 | 1 | 1009.5033 |
| 71712  | 30 | 20 | 44.5 | 5644 | 1 | 1 | 1 | 1012.5737 |
| 50755  | 29 | 16 | 50.1 | 883  | 1 | 0 | 0 | 533.2167  |
| 50755  | 29 | 16 | 50.1 | 1160 | 1 | 0 | 0 | 570.3502  |

|        |    |    |      |      |   |   |   |           |
|--------|----|----|------|------|---|---|---|-----------|
| 50755  | 29 | 16 | 50.1 | 1189 | 1 | 0 | 0 | 573.7982  |
| 50755  | 29 | 16 | 50.1 | 1546 | 1 | 0 | 0 | 616.2921  |
| 50755  | 29 | 16 | 50.1 | 1704 | 1 | 0 | 0 | 637.8461  |
| 50755  | 29 | 16 | 50.1 | 2050 | 1 | 0 | 0 | 686.3451  |
| 50755  | 29 | 16 | 50.1 | 2079 | 1 | 1 | 1 | 690.824   |
| 50755  | 29 | 16 | 50.1 | 2108 | 1 | 0 | 0 | 692.8545  |
| 50755  | 29 | 16 | 50.1 | 2761 | 1 | 0 | 0 | 811.9293  |
| 50755  | 29 | 16 | 50.1 | 2903 | 1 | 0 | 0 | 840.4018  |
| 50755  | 29 | 16 | 50.1 | 2953 | 1 | 0 | 0 | 848.9203  |
| 50755  | 29 | 16 | 50.1 | 3630 | 1 | 0 | 0 | 979.0052  |
| 50755  | 29 | 16 | 50.1 | 3909 | 1 | 0 | 0 | 695.7039  |
| 50755  | 29 | 16 | 50.1 | 5348 | 1 | 0 | 0 | 938.7834  |
| 50755  | 29 | 16 | 50.1 | 6105 | 1 | 0 | 0 | 1133.839  |
| 50755  | 29 | 16 | 50.1 | 6636 | 1 | 0 | 0 | 1525.377  |
| 71559  | 26 | 18 | 38.4 | 1480 | 1 | 0 | 0 | 608.3295  |
| 71559  | 26 | 18 | 38.4 | 1533 | 1 | 0 | 0 | 614.817   |
| 71559  | 26 | 18 | 38.4 | 1720 | 1 | 0 | 0 | 639.8182  |
| 71559  | 26 | 18 | 38.4 | 1827 | 1 | 1 | 1 | 654.8557  |
| 71559  | 26 | 18 | 38.4 | 2000 | 1 | 0 | 0 | 679.8111  |
| 71559  | 26 | 18 | 38.4 | 2114 | 1 | 0 | 0 | 693.8697  |
| 71559  | 26 | 18 | 38.4 | 2194 | 1 | 1 | 1 | 704.3848  |
| 71559  | 26 | 18 | 38.4 | 2274 | 1 | 1 | 1 | 716.3753  |
| 71559  | 26 | 18 | 38.4 | 2399 | 1 | 0 | 0 | 737.3462  |
| 71559  | 26 | 18 | 38.4 | 2513 | 1 | 1 | 1 | 761.9034  |
| 71559  | 26 | 18 | 38.4 | 2844 | 1 | 0 | 0 | 830.4508  |
| 71559  | 26 | 18 | 38.4 | 2885 | 1 | 0 | 0 | 838.3679  |
| 71559  | 26 | 18 | 38.4 | 2889 | 1 | 1 | 1 | 839.4162  |
| 71559  | 26 | 18 | 38.4 | 2907 | 1 | 0 | 0 | 840.9203  |
| 71559  | 26 | 18 | 38.4 | 3197 | 1 | 0 | 0 | 894.4982  |
| 71559  | 26 | 18 | 38.4 | 3963 | 1 | 1 | 1 | 704.7043  |
| 71559  | 26 | 18 | 38.4 | 4957 | 1 | 0 | 0 | 1287.6368 |
| 71559  | 26 | 18 | 38.4 | 5052 | 1 | 0 | 0 | 1329.6369 |
| 136636 | 25 | 18 | 20   | 231  | 1 | 1 | 1 | 424.7529  |
| 136636 | 25 | 18 | 20   | 492  | 1 | 1 | 1 | 476.2479  |
| 136636 | 25 | 18 | 20   | 558  | 1 | 1 | 1 | 486.7717  |
| 136636 | 25 | 18 | 20   | 612  | 1 | 1 | 1 | 494.7832  |
| 136636 | 25 | 18 | 20   | 1216 | 1 | 1 | 1 | 576.8042  |
| 136636 | 25 | 18 | 20   | 1565 | 1 | 1 | 1 | 618.3062  |
| 136636 | 25 | 18 | 20   | 1691 | 1 | 1 | 1 | 635.3615  |
| 136636 | 25 | 18 | 20   | 1709 | 1 | 1 | 1 | 638.8283  |
| 136636 | 25 | 18 | 20   | 2189 | 1 | 1 | 1 | 703.9085  |
| 136636 | 25 | 18 | 20   | 2383 | 1 | 1 | 1 | 734.8951  |
| 136636 | 25 | 18 | 20   | 2431 | 1 | 1 | 1 | 742.3843  |
| 136636 | 25 | 18 | 20   | 2631 | 1 | 1 | 1 | 784.9184  |
| 136636 | 25 | 18 | 20   | 3580 | 1 | 1 | 1 | 644.3626  |
| 136636 | 25 | 18 | 20   | 3651 | 1 | 1 | 1 | 983.0145  |
| 136636 | 25 | 18 | 20   | 3939 | 1 | 1 | 1 | 700.6888  |
| 136636 | 25 | 18 | 20   | 4302 | 1 | 1 | 1 | 1121.1202 |
| 136636 | 25 | 18 | 20   | 4873 | 1 | 1 | 1 | 1251.1752 |
| 136636 | 25 | 18 | 20   | 6639 | 1 | 1 | 1 | 1147.3181 |
| 103616 | 28 | 22 | 32   | 113  | 1 | 1 | 1 | 392.7559  |
| 103616 | 28 | 22 | 32   | 800  | 1 | 0 | 0 | 519.768   |
| 103616 | 28 | 22 | 32   | 1087 | 1 | 0 | 0 | 558.799   |
| 103616 | 28 | 22 | 32   | 1242 | 1 | 0 | 0 | 579.8216  |
| 103616 | 28 | 22 | 32   | 1247 | 1 | 0 | 0 | 580.3006  |
| 103616 | 28 | 22 | 32   | 1306 | 1 | 0 | 0 | 587.2494  |
| 103616 | 28 | 22 | 32   | 1451 | 1 | 0 | 0 | 403.219   |
| 103616 | 28 | 22 | 32   | 1840 | 1 | 0 | 0 | 657.8717  |

|        |    |    |      |      |   |   |   |           |
|--------|----|----|------|------|---|---|---|-----------|
| 103616 | 28 | 22 | 32   | 2099 | 1 | 0 | 0 | 691.8849  |
| 103616 | 28 | 22 | 32   | 2161 | 1 | 0 | 0 | 699.3723  |
| 103616 | 28 | 22 | 32   | 2259 | 1 | 1 | 1 | 713.8331  |
| 103616 | 28 | 22 | 32   | 2412 | 1 | 0 | 0 | 738.8952  |
| 103616 | 28 | 22 | 32   | 2461 | 1 | 0 | 0 | 748.8686  |
| 103616 | 28 | 22 | 32   | 2942 | 1 | 0 | 0 | 846.4088  |
| 103616 | 28 | 22 | 32   | 3709 | 1 | 0 | 0 | 662.6571  |
| 103616 | 28 | 22 | 32   | 3805 | 1 | 0 | 0 | 1017.0684 |
| 103616 | 28 | 22 | 32   | 4409 | 1 | 0 | 0 | 1132.5789 |
| 103616 | 28 | 22 | 32   | 4745 | 1 | 0 | 0 | 799.765   |
| 103616 | 28 | 22 | 32   | 4883 | 1 | 0 | 0 | 836.7988  |
| 103616 | 28 | 22 | 32   | 5069 | 1 | 0 | 0 | 666.8758  |
| 103616 | 28 | 22 | 32   | 6286 | 1 | 0 | 0 | 1273.0234 |
| 98766  | 19 | 15 | 22.4 | 737  | 1 | 1 | 1 | 511.2713  |
| 98766  | 19 | 15 | 22.4 | 1228 | 1 | 1 | 1 | 578.7742  |
| 98766  | 19 | 15 | 22.4 | 1267 | 1 | 1 | 1 | 582.306   |
| 98766  | 19 | 15 | 22.4 | 1288 | 1 | 1 | 1 | 584.3029  |
| 98766  | 19 | 15 | 22.4 | 1679 | 1 | 1 | 1 | 634.308   |
| 98766  | 19 | 15 | 22.4 | 1926 | 1 | 1 | 1 | 668.8405  |
| 98766  | 19 | 15 | 22.4 | 2183 | 1 | 1 | 1 | 702.4367  |
| 98766  | 19 | 15 | 22.4 | 2426 | 1 | 1 | 1 | 740.9148  |
| 98766  | 19 | 15 | 22.4 | 2624 | 1 | 1 | 1 | 783.4582  |
| 98766  | 19 | 15 | 22.4 | 3733 | 1 | 1 | 1 | 1000.0324 |
| 98766  | 19 | 15 | 22.4 | 3845 | 1 | 1 | 1 | 1027.5267 |
| 98766  | 19 | 15 | 22.4 | 3962 | 1 | 1 | 1 | 1056.5297 |
| 98766  | 19 | 15 | 22.4 | 4921 | 1 | 1 | 1 | 847.1077  |
| 98766  | 19 | 15 | 22.4 | 5056 | 1 | 1 | 1 | 887.7675  |
| 98766  | 19 | 15 | 22.4 | 5065 | 1 | 1 | 1 | 888.4987  |
| 49813  | 24 | 11 | 34.7 | 392  | 1 | 1 | 1 | 457.787   |
| 49813  | 24 | 11 | 34.7 | 498  | 1 | 1 | 1 | 477.2684  |
| 49813  | 24 | 11 | 34.7 | 748  | 1 | 1 | 1 | 513.3082  |
| 49813  | 24 | 11 | 34.7 | 1098 | 1 | 1 | 1 | 560.8029  |
| 49813  | 24 | 11 | 34.7 | 1786 | 1 | 1 | 1 | 649.8769  |
| 49813  | 24 | 11 | 34.7 | 2333 | 1 | 1 | 1 | 726.3401  |
| 49813  | 24 | 11 | 34.7 | 2685 | 1 | 1 | 1 | 793.9191  |
| 49813  | 24 | 11 | 34.7 | 2788 | 1 | 1 | 1 | 545.6379  |
| 49813  | 24 | 11 | 34.7 | 4546 | 1 | 1 | 1 | 1148.57   |
| 49813  | 24 | 11 | 34.7 | 4907 | 1 | 1 | 1 | 1261.6651 |
| 49813  | 24 | 11 | 34.7 | 5598 | 1 | 1 | 1 | 991.8135  |
| 71741  | 18 | 13 | 28.9 | 1401 | 1 | 1 | 1 | 599.3508  |
| 71741  | 18 | 13 | 28.9 | 1533 | 1 | 0 | 0 | 614.817   |
| 71741  | 18 | 13 | 28.9 | 1720 | 1 | 0 | 0 | 639.8182  |
| 71741  | 18 | 13 | 28.9 | 2000 | 1 | 0 | 0 | 679.8111  |
| 71741  | 18 | 13 | 28.9 | 2399 | 1 | 0 | 0 | 737.3462  |
| 71741  | 18 | 13 | 28.9 | 2844 | 1 | 0 | 0 | 830.4508  |
| 71741  | 18 | 13 | 28.9 | 2858 | 1 | 0 | 0 | 832.4077  |
| 71741  | 18 | 13 | 28.9 | 2885 | 1 | 0 | 0 | 838.3679  |
| 71741  | 18 | 13 | 28.9 | 2907 | 1 | 0 | 0 | 840.9203  |
| 71741  | 18 | 13 | 28.9 | 3197 | 1 | 0 | 0 | 894.4982  |
| 71741  | 18 | 13 | 28.9 | 3659 | 1 | 0 | 0 | 984.0059  |
| 71741  | 18 | 13 | 28.9 | 4957 | 1 | 0 | 0 | 1287.6368 |
| 71741  | 18 | 13 | 28.9 | 5753 | 1 | 1 | 1 | 1050.8396 |
| 41112  | 15 | 11 | 31.3 | 130  | 1 | 1 | 1 | 397.2265  |
| 41112  | 15 | 11 | 31.3 | 177  | 1 | 1 | 0 | 408.7505  |
| 41112  | 15 | 11 | 31.3 | 473  | 1 | 1 | 0 | 472.7979  |
| 41112  | 15 | 11 | 31.3 | 1311 | 1 | 1 | 0 | 587.8103  |
| 41112  | 15 | 11 | 31.3 | 1505 | 1 | 1 | 0 | 611.8184  |
| 41112  | 15 | 11 | 31.3 | 2421 | 1 | 1 | 0 | 740.3936  |

|        |    |    |      |      |   |   |   |           |
|--------|----|----|------|------|---|---|---|-----------|
| 41112  | 15 | 11 | 31.3 | 2499 | 1 | 1 | 1 | 758.3617  |
| 41112  | 15 | 11 | 31.3 | 2919 | 1 | 1 | 1 | 841.9204  |
| 41112  | 15 | 11 | 31.3 | 3305 | 1 | 1 | 1 | 915.5025  |
| 41112  | 15 | 11 | 31.3 | 3342 | 1 | 1 | 1 | 923.9312  |
| 41112  | 15 | 11 | 31.3 | 4049 | 1 | 1 | 0 | 1079.0426 |
| 71456  | 21 | 16 | 31.1 | 1533 | 1 | 0 | 0 | 614.817   |
| 71456  | 21 | 16 | 31.1 | 1550 | 1 | 1 | 1 | 616.3272  |
| 71456  | 21 | 16 | 31.1 | 1720 | 1 | 0 | 0 | 639.8182  |
| 71456  | 21 | 16 | 31.1 | 1837 | 1 | 0 | 0 | 657.3134  |
| 71456  | 21 | 16 | 31.1 | 2000 | 1 | 0 | 0 | 679.8111  |
| 71456  | 21 | 16 | 31.1 | 2213 | 1 | 1 | 1 | 706.8777  |
| 71456  | 21 | 16 | 31.1 | 2399 | 1 | 0 | 0 | 737.3462  |
| 71456  | 21 | 16 | 31.1 | 2568 | 1 | 0 | 0 | 770.882   |
| 71456  | 21 | 16 | 31.1 | 2668 | 1 | 1 | 1 | 791.4133  |
| 71456  | 21 | 16 | 31.1 | 2844 | 1 | 0 | 0 | 830.4508  |
| 71456  | 21 | 16 | 31.1 | 2872 | 1 | 1 | 1 | 833.3977  |
| 71456  | 21 | 16 | 31.1 | 2885 | 1 | 0 | 0 | 838.3679  |
| 71456  | 21 | 16 | 31.1 | 2907 | 1 | 0 | 0 | 840.9203  |
| 71456  | 21 | 16 | 31.1 | 3197 | 1 | 0 | 0 | 894.4982  |
| 71456  | 21 | 16 | 31.1 | 3659 | 1 | 0 | 0 | 984.0059  |
| 71456  | 21 | 16 | 31.1 | 4957 | 1 | 0 | 0 | 1287.6368 |
| 615675 | 18 | 16 | 4.2  | 396  | 1 | 1 | 1 | 458.2972  |
| 615675 | 18 | 16 | 4.2  | 505  | 1 | 1 | 1 | 478.3005  |
| 615675 | 18 | 16 | 4.2  | 788  | 1 | 1 | 1 | 518.2952  |
| 615675 | 18 | 16 | 4.2  | 1071 | 1 | 1 | 1 | 557.2822  |
| 615675 | 18 | 16 | 4.2  | 2088 | 1 | 1 | 1 | 690.885   |
| 615675 | 18 | 16 | 4.2  | 2233 | 1 | 1 | 1 | 710.8933  |
| 615675 | 18 | 16 | 4.2  | 2418 | 1 | 1 | 1 | 739.8429  |
| 615675 | 18 | 16 | 4.2  | 2477 | 1 | 1 | 1 | 751.8655  |
| 615675 | 18 | 16 | 4.2  | 2571 | 1 | 1 | 1 | 771.4274  |
| 615675 | 18 | 16 | 4.2  | 2754 | 1 | 1 | 1 | 810.4538  |
| 615675 | 18 | 16 | 4.2  | 3462 | 1 | 1 | 1 | 943.5529  |
| 615675 | 18 | 16 | 4.2  | 3616 | 1 | 1 | 1 | 973.4983  |
| 615675 | 18 | 16 | 4.2  | 3867 | 1 | 1 | 1 | 689.702   |
| 615675 | 18 | 16 | 4.2  | 3924 | 1 | 1 | 1 | 1047.0509 |
| 615675 | 18 | 16 | 4.2  | 4147 | 1 | 1 | 1 | 1100.0366 |
| 615675 | 18 | 16 | 4.2  | 4911 | 1 | 1 | 1 | 843.0533  |
| 286993 | 12 | 10 | 5.9  | 1442 | 1 | 1 | 1 | 603.4152  |
| 286993 | 12 | 10 | 5.9  | 1560 | 1 | 1 | 1 | 617.8085  |
| 286993 | 12 | 10 | 5.9  | 2018 | 1 | 1 | 1 | 681.8767  |
| 286993 | 12 | 10 | 5.9  | 2063 | 1 | 1 | 1 | 687.8867  |
| 286993 | 12 | 10 | 5.9  | 3132 | 1 | 1 | 1 | 881.4819  |
| 286993 | 12 | 10 | 5.9  | 3830 | 1 | 1 | 1 | 1025.0564 |
| 286993 | 12 | 10 | 5.9  | 4133 | 1 | 1 | 1 | 1097.6198 |
| 286993 | 12 | 10 | 5.9  | 4297 | 1 | 1 | 1 | 747.397   |
| 286993 | 12 | 10 | 5.9  | 5172 | 1 | 1 | 1 | 912.8492  |
| 286993 | 12 | 10 | 5.9  | 5746 | 1 | 1 | 1 | 1047.9252 |
| 44960  | 15 | 12 | 43.9 | 1244 | 1 | 1 | 0 | 579.8293  |
| 44960  | 15 | 12 | 43.9 | 1262 | 1 | 1 | 1 | 581.797   |
| 44960  | 15 | 12 | 43.9 | 1700 | 1 | 1 | 0 | 637.326   |
| 44960  | 15 | 12 | 43.9 | 1711 | 1 | 1 | 0 | 638.8484  |
| 44960  | 15 | 12 | 43.9 | 2093 | 1 | 1 | 0 | 691.8317  |
| 44960  | 15 | 12 | 43.9 | 2136 | 1 | 1 | 0 | 696.8832  |
| 44960  | 15 | 12 | 43.9 | 2994 | 1 | 1 | 0 | 569.9804  |
| 44960  | 15 | 12 | 43.9 | 3231 | 1 | 1 | 0 | 900.9802  |
| 44960  | 15 | 12 | 43.9 | 3587 | 1 | 1 | 1 | 969.4852  |
| 44960  | 15 | 12 | 43.9 | 4236 | 1 | 1 | 0 | 742.0756  |
| 44960  | 15 | 12 | 43.9 | 5848 | 1 | 1 | 0 | 1082.1898 |

|        |    |    |      |      |   |   |   |           |
|--------|----|----|------|------|---|---|---|-----------|
| 52347  | 12 | 8  | 24.7 | 1219 | 1 | 1 | 1 | 576.8604  |
| 52347  | 12 | 8  | 24.7 | 1531 | 1 | 1 | 1 | 614.7881  |
| 52347  | 12 | 8  | 24.7 | 2955 | 1 | 1 | 1 | 849.3846  |
| 52347  | 12 | 8  | 24.7 | 3044 | 1 | 1 | 1 | 864.8778  |
| 52347  | 12 | 8  | 24.7 | 3187 | 1 | 1 | 1 | 890.9081  |
| 52347  | 12 | 8  | 24.7 | 4032 | 1 | 1 | 1 | 1075.5693 |
| 52347  | 12 | 8  | 24.7 | 4130 | 1 | 1 | 1 | 731.7769  |
| 52347  | 12 | 8  | 24.7 | 4645 | 1 | 1 | 1 | 1174.0968 |
| 125058 | 16 | 13 | 20.9 | 226  | 1 | 1 | 1 | 422.7569  |
| 125058 | 16 | 13 | 20.9 | 783  | 1 | 1 | 1 | 518.2483  |
| 125058 | 16 | 13 | 20.9 | 876  | 1 | 1 | 1 | 532.3026  |
| 125058 | 16 | 13 | 20.9 | 1280 | 1 | 1 | 1 | 583.8061  |
| 125058 | 16 | 13 | 20.9 | 1569 | 1 | 1 | 1 | 618.8747  |
| 125058 | 16 | 13 | 20.9 | 2995 | 1 | 1 | 1 | 855.402   |
| 125058 | 16 | 13 | 20.9 | 3045 | 1 | 1 | 1 | 864.9397  |
| 125058 | 16 | 13 | 20.9 | 4715 | 1 | 1 | 1 | 1190.5691 |
| 125058 | 16 | 13 | 20.9 | 4877 | 1 | 1 | 1 | 1252.6306 |
| 125058 | 16 | 13 | 20.9 | 5275 | 1 | 1 | 1 | 696.8507  |
| 125058 | 16 | 13 | 20.9 | 5477 | 1 | 1 | 1 | 962.1509  |
| 125058 | 16 | 13 | 20.9 | 5798 | 1 | 1 | 1 | 1066.5445 |
| 125058 | 16 | 13 | 20.9 | 5914 | 1 | 1 | 1 | 1106.559  |
| 47236  | 12 | 9  | 32.9 | 286  | 1 | 1 | 0 | 433.7641  |
| 47236  | 12 | 9  | 32.9 | 1244 | 1 | 0 | 0 | 579.8293  |
| 47236  | 12 | 9  | 32.9 | 1283 | 1 | 1 | 0 | 584.2729  |
| 47236  | 12 | 9  | 32.9 | 1397 | 1 | 1 | 0 | 598.2826  |
| 47236  | 12 | 9  | 32.9 | 1776 | 1 | 1 | 0 | 648.3242  |
| 47236  | 12 | 9  | 32.9 | 2816 | 1 | 1 | 0 | 823.4491  |
| 47236  | 12 | 9  | 32.9 | 3663 | 1 | 1 | 1 | 984.4724  |
| 47236  | 12 | 9  | 32.9 | 4381 | 1 | 1 | 0 | 753.3647  |
| 47236  | 12 | 9  | 32.9 | 6295 | 1 | 1 | 1 | 1278.272  |
| 73315  | 13 | 11 | 24.6 | 1615 | 1 | 1 | 1 | 624.8451  |
| 73315  | 13 | 11 | 24.6 | 1616 | 1 | 1 | 1 | 625.2861  |
| 73315  | 13 | 11 | 24.6 | 1888 | 1 | 1 | 1 | 664.3221  |
| 73315  | 13 | 11 | 24.6 | 2013 | 1 | 1 | 1 | 681.3758  |
| 73315  | 13 | 11 | 24.6 | 2224 | 1 | 1 | 0 | 709.3708  |
| 73315  | 13 | 11 | 24.6 | 2415 | 1 | 1 | 1 | 739.3858  |
| 73315  | 13 | 11 | 24.6 | 3265 | 1 | 1 | 1 | 907.4804  |
| 73315  | 13 | 11 | 24.6 | 3597 | 1 | 1 | 1 | 970.5071  |
| 73315  | 13 | 11 | 24.6 | 3882 | 1 | 1 | 1 | 691.0355  |
| 73315  | 13 | 11 | 24.6 | 5367 | 1 | 1 | 1 | 942.5476  |
| 73315  | 13 | 11 | 24.6 | 5686 | 1 | 1 | 1 | 1026.8279 |
| 40949  | 13 | 11 | 36.6 | 177  | 1 | 0 | 0 | 408.7505  |
| 40949  | 13 | 11 | 36.6 | 473  | 1 | 0 | 0 | 472.7979  |
| 40949  | 13 | 11 | 36.6 | 1311 | 1 | 0 | 0 | 587.8103  |
| 40949  | 13 | 11 | 36.6 | 1505 | 1 | 0 | 0 | 611.8184  |
| 40949  | 13 | 11 | 36.6 | 2421 | 1 | 0 | 0 | 740.3936  |
| 40949  | 13 | 11 | 36.6 | 2499 | 1 | 0 | 1 | 758.3617  |
| 40949  | 13 | 11 | 36.6 | 3155 | 1 | 1 | 1 | 883.4594  |
| 40949  | 13 | 11 | 36.6 | 3230 | 1 | 1 | 1 | 900.9727  |
| 40949  | 13 | 11 | 36.6 | 3290 | 1 | 1 | 1 | 911.9858  |
| 40949  | 13 | 11 | 36.6 | 4049 | 1 | 0 | 0 | 1079.0426 |
| 40949  | 13 | 11 | 36.6 | 5168 | 1 | 1 | 1 | 912.7767  |
| 103283 | 13 | 10 | 12.9 | 733  | 1 | 1 | 1 | 510.2602  |
| 103283 | 13 | 10 | 12.9 | 1365 | 1 | 1 | 1 | 594.3221  |
| 103283 | 13 | 10 | 12.9 | 1717 | 1 | 1 | 1 | 639.3586  |
| 103283 | 13 | 10 | 12.9 | 1742 | 1 | 1 | 0 | 642.3153  |
| 103283 | 13 | 10 | 12.9 | 2253 | 1 | 1 | 1 | 712.8854  |
| 103283 | 13 | 10 | 12.9 | 2311 | 1 | 1 | 1 | 481.6072  |

|        |    |    |      |      |   |   |   |           |
|--------|----|----|------|------|---|---|---|-----------|
| 103283 | 13 | 10 | 12.9 | 2313 | 1 | 1 | 1 | 722.3955  |
| 103283 | 13 | 10 | 12.9 | 2372 | 1 | 1 | 1 | 731.8881  |
| 103283 | 13 | 10 | 12.9 | 2812 | 1 | 1 | 1 | 822.9749  |
| 103283 | 13 | 10 | 12.9 | 4856 | 1 | 1 | 1 | 829.0775  |
| 65547  | 18 | 12 | 29.5 | 517  | 1 | 0 | 1 | 481.2137  |
| 65547  | 18 | 12 | 29.5 | 912  | 1 | 1 | 0 | 536.7767  |
| 65547  | 18 | 12 | 29.5 | 1368 | 1 | 1 | 0 | 594.3549  |
| 65547  | 18 | 12 | 29.5 | 1402 | 1 | 1 | 1 | 599.7791  |
| 65547  | 18 | 12 | 29.5 | 2380 | 1 | 1 | 1 | 733.9162  |
| 65547  | 18 | 12 | 29.5 | 2471 | 1 | 1 | 1 | 750.8465  |
| 65547  | 18 | 12 | 29.5 | 2572 | 1 | 1 | 0 | 514.6604  |
| 65547  | 18 | 12 | 29.5 | 3276 | 1 | 1 | 1 | 908.459   |
| 65547  | 18 | 12 | 29.5 | 4313 | 1 | 1 | 1 | 748.7341  |
| 65547  | 18 | 12 | 29.5 | 4769 | 1 | 1 | 0 | 1205.5708 |
| 65547  | 18 | 12 | 29.5 | 4974 | 1 | 1 | 1 | 862.1202  |
| 65547  | 18 | 12 | 29.5 | 5523 | 1 | 1 | 1 | 969.1654  |
| 37004  | 13 | 10 | 38.8 | 203  | 1 | 1 | 1 | 417.2369  |
| 37004  | 13 | 10 | 38.8 | 1165 | 1 | 1 | 1 | 570.8254  |
| 37004  | 13 | 10 | 38.8 | 1201 | 1 | 1 | 1 | 383.5608  |
| 37004  | 13 | 10 | 38.8 | 2284 | 1 | 1 | 1 | 717.8813  |
| 37004  | 13 | 10 | 38.8 | 2465 | 1 | 1 | 1 | 749.9271  |
| 37004  | 13 | 10 | 38.8 | 2888 | 1 | 1 | 1 | 559.6625  |
| 37004  | 13 | 10 | 38.8 | 3128 | 1 | 1 | 1 | 881.3964  |
| 37004  | 13 | 10 | 38.8 | 3802 | 1 | 1 | 1 | 1017.0404 |
| 37004  | 13 | 10 | 38.8 | 4083 | 1 | 1 | 1 | 1086.5077 |
| 37004  | 13 | 10 | 38.8 | 5024 | 1 | 1 | 1 | 877.4703  |
| 73174  | 12 | 9  | 18.6 | 1122 | 1 | 1 | 1 | 565.7881  |
| 73174  | 12 | 9  | 18.6 | 1378 | 1 | 1 | 1 | 595.8424  |
| 73174  | 12 | 9  | 18.6 | 1564 | 1 | 1 | 1 | 618.2909  |
| 73174  | 12 | 9  | 18.6 | 2223 | 1 | 1 | 1 | 709.3676  |
| 73174  | 12 | 9  | 18.6 | 2224 | 1 | 0 | 0 | 709.3708  |
| 73174  | 12 | 9  | 18.6 | 3285 | 1 | 1 | 1 | 911.4576  |
| 73174  | 12 | 9  | 18.6 | 3409 | 1 | 1 | 1 | 624.0041  |
| 73174  | 12 | 9  | 18.6 | 3597 | 1 | 0 | 1 | 970.5071  |
| 73174  | 12 | 9  | 18.6 | 4823 | 1 | 1 | 1 | 1228.7043 |
| 58863  | 13 | 11 | 34.8 | 504  | 1 | 1 | 1 | 478.2897  |
| 58863  | 13 | 11 | 34.8 | 998  | 1 | 1 | 1 | 546.303   |
| 58863  | 13 | 11 | 34.8 | 1854 | 1 | 1 | 1 | 659.3651  |
| 58863  | 13 | 11 | 34.8 | 2735 | 1 | 1 | 1 | 805.4426  |
| 58863  | 13 | 11 | 34.8 | 2835 | 1 | 1 | 1 | 826.4127  |
| 58863  | 13 | 11 | 34.8 | 2971 | 1 | 1 | 1 | 851.8725  |
| 58863  | 13 | 11 | 34.8 | 3670 | 1 | 1 | 1 | 657.6892  |
| 58863  | 13 | 11 | 34.8 | 4140 | 1 | 1 | 1 | 1099.0572 |
| 58863  | 13 | 11 | 34.8 | 4640 | 1 | 1 | 1 | 781.743   |
| 58863  | 13 | 11 | 34.8 | 5054 | 1 | 1 | 1 | 886.7869  |
| 58863  | 13 | 11 | 34.8 | 5773 | 1 | 1 | 1 | 1053.2116 |
| 94743  | 10 | 9  | 19.2 | 54   | 1 | 1 | 1 | 372.6948  |
| 94743  | 10 | 9  | 19.2 | 2341 | 1 | 1 | 1 | 726.8483  |
| 94743  | 10 | 9  | 19.2 | 2476 | 1 | 1 | 1 | 751.8423  |
| 94743  | 10 | 9  | 19.2 | 3228 | 1 | 1 | 1 | 900.4691  |
| 94743  | 10 | 9  | 19.2 | 3244 | 1 | 1 | 1 | 603.3137  |
| 94743  | 10 | 9  | 19.2 | 4377 | 1 | 1 | 1 | 1129.1051 |
| 94743  | 10 | 9  | 19.2 | 4748 | 1 | 1 | 1 | 800.7265  |
| 94743  | 10 | 9  | 19.2 | 5551 | 1 | 1 | 1 | 978.1487  |
| 94743  | 10 | 9  | 19.2 | 5828 | 1 | 1 | 1 | 806.4122  |
| 83408  | 10 | 8  | 14.5 | 812  | 1 | 1 | 1 | 521.7514  |
| 83408  | 10 | 8  | 14.5 | 1501 | 1 | 1 | 1 | 610.8259  |
| 83408  | 10 | 8  | 14.5 | 1635 | 1 | 1 | 1 | 628.8296  |

|       |    |    |      |      |   |   |   |           |
|-------|----|----|------|------|---|---|---|-----------|
| 83408 | 10 | 8  | 14.5 | 1883 | 1 | 1 | 1 | 442.5651  |
| 83408 | 10 | 8  | 14.5 | 2393 | 1 | 1 | 1 | 735.9001  |
| 83408 | 10 | 8  | 14.5 | 2829 | 1 | 1 | 1 | 825.4001  |
| 83408 | 10 | 8  | 14.5 | 2873 | 1 | 1 | 1 | 833.4271  |
| 83408 | 10 | 8  | 14.5 | 4785 | 1 | 1 | 1 | 1208.6133 |
| 65220 | 8  | 6  | 18.1 | 1966 | 1 | 1 | 1 | 672.8779  |
| 65220 | 8  | 6  | 18.1 | 2801 | 1 | 1 | 1 | 821.4178  |
| 65220 | 8  | 6  | 18.1 | 3049 | 1 | 1 | 1 | 865.9204  |
| 65220 | 8  | 6  | 18.1 | 3608 | 1 | 1 | 1 | 648.6491  |
| 65220 | 8  | 6  | 18.1 | 4031 | 1 | 1 | 1 | 1075.5549 |
| 65220 | 8  | 6  | 18.1 | 5093 | 1 | 1 | 1 | 894.1208  |
| 49487 | 10 | 9  | 29.8 | 561  | 1 | 1 | 1 | 486.7905  |
| 49487 | 10 | 9  | 29.8 | 963  | 1 | 1 | 1 | 542.3002  |
| 49487 | 10 | 9  | 29.8 | 1572 | 1 | 1 | 1 | 619.3299  |
| 49487 | 10 | 9  | 29.8 | 1754 | 1 | 1 | 1 | 644.358   |
| 49487 | 10 | 9  | 29.8 | 2297 | 1 | 1 | 1 | 479.612   |
| 49487 | 10 | 9  | 29.8 | 3107 | 1 | 1 | 1 | 876.4351  |
| 49487 | 10 | 9  | 29.8 | 4015 | 1 | 1 | 1 | 1073.0583 |
| 49487 | 10 | 9  | 29.8 | 4053 | 1 | 1 | 1 | 1079.5767 |
| 49487 | 10 | 9  | 29.8 | 4163 | 1 | 1 | 1 | 1103.0719 |
| 62205 | 9  | 9  | 20.5 | 1435 | 1 | 1 | 1 | 602.8147  |
| 62205 | 9  | 9  | 20.5 | 1758 | 1 | 1 | 1 | 645.812   |
| 62205 | 9  | 9  | 20.5 | 2420 | 1 | 1 | 1 | 740.3764  |
| 62205 | 9  | 9  | 20.5 | 2833 | 1 | 1 | 1 | 825.8995  |
| 62205 | 9  | 9  | 20.5 | 3112 | 1 | 1 | 1 | 877.4673  |
| 62205 | 9  | 9  | 20.5 | 4003 | 1 | 1 | 1 | 713.7241  |
| 62205 | 9  | 9  | 20.5 | 4337 | 1 | 1 | 1 | 1125.6511 |
| 62205 | 9  | 9  | 20.5 | 4901 | 1 | 1 | 1 | 840.4981  |
| 62205 | 9  | 9  | 20.5 | 5412 | 1 | 1 | 1 | 950.5503  |
| 41937 | 11 | 8  | 32.4 | 570  | 1 | 1 | 0 | 488.7278  |
| 41937 | 11 | 8  | 32.4 | 1182 | 1 | 1 | 0 | 572.784   |
| 41937 | 11 | 8  | 32.4 | 1316 | 1 | 1 | 0 | 588.7714  |
| 41937 | 11 | 8  | 32.4 | 1403 | 1 | 1 | 0 | 599.856   |
| 41937 | 11 | 8  | 32.4 | 3178 | 1 | 1 | 0 | 887.9509  |
| 41937 | 11 | 8  | 32.4 | 3366 | 1 | 1 | 1 | 928.4683  |
| 41937 | 11 | 8  | 32.4 | 3625 | 1 | 1 | 0 | 977.5359  |
| 41937 | 11 | 8  | 32.4 | 5757 | 1 | 1 | 0 | 1051.2178 |
| 40001 | 13 | 8  | 27.5 | 1001 | 1 | 1 | 1 | 547.2396  |
| 40001 | 13 | 8  | 27.5 | 1395 | 1 | 1 | 0 | 597.3347  |
| 40001 | 13 | 8  | 27.5 | 1485 | 1 | 1 | 0 | 609.3057  |
| 40001 | 13 | 8  | 27.5 | 1730 | 1 | 1 | 1 | 640.8188  |
| 40001 | 13 | 8  | 27.5 | 2245 | 1 | 1 | 0 | 712.3356  |
| 40001 | 13 | 8  | 27.5 | 2432 | 1 | 1 | 1 | 742.4143  |
| 40001 | 13 | 8  | 27.5 | 2721 | 1 | 1 | 1 | 801.9387  |
| 40001 | 13 | 8  | 27.5 | 3803 | 1 | 1 | 1 | 678.3628  |
| 36185 | 14 | 9  | 34.2 | 462  | 1 | 1 | 1 | 472.258   |
| 36185 | 14 | 9  | 34.2 | 1744 | 1 | 1 | 1 | 642.3817  |
| 36185 | 14 | 9  | 34.2 | 1805 | 1 | 1 | 1 | 652.379   |
| 36185 | 14 | 9  | 34.2 | 1829 | 1 | 1 | 1 | 655.8137  |
| 36185 | 14 | 9  | 34.2 | 2080 | 1 | 1 | 1 | 690.8265  |
| 36185 | 14 | 9  | 34.2 | 2456 | 1 | 1 | 1 | 747.8804  |
| 36185 | 14 | 9  | 34.2 | 2497 | 1 | 1 | 1 | 505.2839  |
| 36185 | 14 | 9  | 34.2 | 2558 | 1 | 1 | 1 | 768.48    |
| 36185 | 14 | 9  | 34.2 | 3111 | 1 | 1 | 1 | 877.4322  |
| 63798 | 14 | 11 | 25.2 | 912  | 1 | 0 | 0 | 536.7767  |
| 63798 | 14 | 11 | 25.2 | 1352 | 1 | 1 | 1 | 592.7712  |
| 63798 | 14 | 11 | 25.2 | 1368 | 1 | 0 | 0 | 594.3549  |
| 63798 | 14 | 11 | 25.2 | 1702 | 1 | 1 | 1 | 637.8404  |

|        |    |    |      |      |   |   |   |           |
|--------|----|----|------|------|---|---|---|-----------|
| 63798  | 14 | 11 | 25.2 | 2434 | 1 | 1 | 1 | 742.8485  |
| 63798  | 14 | 11 | 25.2 | 2562 | 1 | 1 | 1 | 513.2862  |
| 63798  | 14 | 11 | 25.2 | 2572 | 1 | 0 | 0 | 514.6604  |
| 63798  | 14 | 11 | 25.2 | 3217 | 1 | 1 | 1 | 898.8765  |
| 63798  | 14 | 11 | 25.2 | 3238 | 1 | 1 | 1 | 902.4322  |
| 63798  | 14 | 11 | 25.2 | 4132 | 1 | 1 | 1 | 732.0586  |
| 63798  | 14 | 11 | 25.2 | 4769 | 1 | 0 | 0 | 1205.5708 |
| 34389  | 9  | 7  | 38   | 214  | 1 | 1 | 1 | 421.2661  |
| 34389  | 9  | 7  | 38   | 1879 | 1 | 1 | 1 | 662.8953  |
| 34389  | 9  | 7  | 38   | 2056 | 1 | 1 | 1 | 687.3249  |
| 34389  | 9  | 7  | 38   | 2714 | 1 | 1 | 1 | 800.4112  |
| 34389  | 9  | 7  | 38   | 2854 | 1 | 1 | 1 | 831.9213  |
| 34389  | 9  | 7  | 38   | 4811 | 1 | 1 | 1 | 815.0617  |
| 34389  | 9  | 7  | 38   | 5886 | 1 | 1 | 1 | 1101.2362 |
| 10285  | 10 | 5  | 55.7 | 409  | 1 | 1 | 1 | 460.7471  |
| 10285  | 10 | 5  | 55.7 | 459  | 1 | 1 | 1 | 471.258   |
| 10285  | 10 | 5  | 55.7 | 840  | 1 | 1 | 1 | 524.7945  |
| 10285  | 10 | 5  | 55.7 | 2303 | 1 | 1 | 1 | 720.3466  |
| 10285  | 10 | 5  | 55.7 | 4046 | 1 | 1 | 1 | 1078.5155 |
| 154652 | 7  | 6  | 6.1  | 1258 | 1 | 1 | 1 | 581.3085  |
| 154652 | 7  | 6  | 6.1  | 1858 | 1 | 1 | 1 | 659.8838  |
| 154652 | 7  | 6  | 6.1  | 2327 | 1 | 1 | 1 | 724.4108  |
| 154652 | 7  | 6  | 6.1  | 2633 | 1 | 1 | 1 | 785.9124  |
| 154652 | 7  | 6  | 6.1  | 3480 | 1 | 1 | 1 | 946       |
| 154652 | 7  | 6  | 6.1  | 3777 | 1 | 1 | 1 | 672.6873  |
| 47389  | 9  | 5  | 17.4 | 1244 | 1 | 0 | 0 | 579.8293  |
| 47389  | 9  | 5  | 17.4 | 1880 | 1 | 1 | 1 | 663.3205  |
| 47389  | 9  | 5  | 17.4 | 2424 | 1 | 1 | 1 | 493.9596  |
| 47389  | 9  | 5  | 17.4 | 3561 | 1 | 1 | 1 | 961.9797  |
| 47389  | 9  | 5  | 17.4 | 3913 | 1 | 1 | 1 | 1044.5048 |
| 148890 | 6  | 4  | 5.1  | 2410 | 1 | 1 | 1 | 738.8904  |
| 148890 | 6  | 4  | 5.1  | 2529 | 1 | 1 | 1 | 763.4566  |
| 148890 | 6  | 4  | 5.1  | 3599 | 1 | 1 | 1 | 971.0322  |
| 148890 | 6  | 4  | 5.1  | 4834 | 1 | 1 | 1 | 823.0873  |
| 196643 | 11 | 10 | 9.4  | 855  | 1 | 1 | 1 | 528.2709  |
| 196643 | 11 | 10 | 9.4  | 1030 | 1 | 1 | 1 | 551.804   |
| 196643 | 11 | 10 | 9.4  | 1733 | 1 | 1 | 1 | 640.9005  |
| 196643 | 11 | 10 | 9.4  | 1853 | 1 | 1 | 1 | 659.3632  |
| 196643 | 11 | 10 | 9.4  | 2984 | 1 | 1 | 1 | 853.4331  |
| 196643 | 11 | 10 | 9.4  | 3993 | 1 | 1 | 1 | 1066.029  |
| 196643 | 11 | 10 | 9.4  | 4156 | 1 | 1 | 1 | 734.7327  |
| 196643 | 11 | 10 | 9.4  | 4692 | 1 | 1 | 1 | 789.3576  |
| 196643 | 11 | 10 | 9.4  | 4778 | 1 | 1 | 1 | 1206.604  |
| 196643 | 11 | 10 | 9.4  | 4890 | 1 | 1 | 1 | 837.7917  |
| 41563  | 13 | 9  | 23.4 | 88   | 1 | 1 | 1 | 384.2007  |
| 41563  | 13 | 9  | 23.4 | 405  | 1 | 1 | 0 | 459.2943  |
| 41563  | 13 | 9  | 23.4 | 1449 | 1 | 1 | 1 | 604.3195  |
| 41563  | 13 | 9  | 23.4 | 1464 | 1 | 1 | 1 | 606.3064  |
| 41563  | 13 | 9  | 23.4 | 2011 | 1 | 1 | 1 | 680.86    |
| 41563  | 13 | 9  | 23.4 | 2196 | 1 | 1 | 1 | 470.2454  |
| 41563  | 13 | 9  | 23.4 | 3799 | 1 | 1 | 1 | 1016.5135 |
| 41563  | 13 | 9  | 23.4 | 3953 | 1 | 1 | 1 | 702.7366  |
| 55711  | 6  | 6  | 22.1 | 694  | 1 | 1 | 1 | 505.7484  |
| 55711  | 6  | 6  | 22.1 | 1848 | 1 | 1 | 1 | 658.838   |
| 55711  | 6  | 6  | 22.1 | 2613 | 1 | 1 | 1 | 780.9082  |
| 55711  | 6  | 6  | 22.1 | 3971 | 1 | 1 | 1 | 1058.5106 |
| 55711  | 6  | 6  | 22.1 | 4709 | 1 | 1 | 1 | 1188.5605 |
| 55711  | 6  | 6  | 22.1 | 6095 | 1 | 1 | 1 | 1132.8888 |

|       |    |    |      |      |   |   |   |           |
|-------|----|----|------|------|---|---|---|-----------|
| 29784 | 4  | 4  | 23.7 | 3585 | 1 | 1 | 1 | 968.02    |
| 29784 | 4  | 4  | 23.7 | 3921 | 1 | 1 | 1 | 697.7162  |
| 29784 | 4  | 4  | 23.7 | 4803 | 1 | 1 | 1 | 1216.1238 |
| 29784 | 4  | 4  | 23.7 | 4855 | 1 | 1 | 1 | 1242.6158 |
| 49607 | 7  | 5  | 15.9 | 1471 | 1 | 1 | 1 | 607.3428  |
| 49607 | 7  | 5  | 15.9 | 2694 | 1 | 1 | 1 | 794.8992  |
| 49607 | 7  | 5  | 15.9 | 2783 | 1 | 1 | 1 | 817.4044  |
| 49607 | 7  | 5  | 15.9 | 2876 | 1 | 1 | 1 | 834.4574  |
| 49607 | 7  | 5  | 15.9 | 3165 | 1 | 0 | 0 | 590.2665  |
| 73869 | 8  | 7  | 12.7 | 1226 | 1 | 1 | 1 | 578.3274  |
| 73869 | 8  | 7  | 12.7 | 1967 | 1 | 1 | 1 | 673.3259  |
| 73869 | 8  | 7  | 12.7 | 2455 | 1 | 1 | 1 | 747.8643  |
| 73869 | 8  | 7  | 12.7 | 2560 | 1 | 1 | 1 | 512.9214  |
| 73869 | 8  | 7  | 12.7 | 2844 | 1 | 0 | 0 | 830.4508  |
| 73869 | 8  | 7  | 12.7 | 3197 | 1 | 0 | 0 | 894.4982  |
| 73869 | 8  | 7  | 12.7 | 3840 | 1 | 1 | 0 | 1027.001  |
| 59440 | 10 | 10 | 27.9 | 380  | 1 | 1 | 1 | 456.2529  |
| 59440 | 10 | 10 | 27.9 | 1567 | 1 | 1 | 0 | 618.8135  |
| 59440 | 10 | 10 | 27.9 | 1769 | 1 | 1 | 1 | 647.343   |
| 59440 | 10 | 10 | 27.9 | 2045 | 1 | 1 | 0 | 685.3194  |
| 59440 | 10 | 10 | 27.9 | 2654 | 1 | 1 | 1 | 789.4288  |
| 59440 | 10 | 10 | 27.9 | 2745 | 1 | 1 | 0 | 807.96    |
| 59440 | 10 | 10 | 27.9 | 2878 | 1 | 1 | 0 | 835.4185  |
| 59440 | 10 | 10 | 27.9 | 3764 | 1 | 1 | 1 | 671.7334  |
| 59440 | 10 | 10 | 27.9 | 4927 | 1 | 1 | 1 | 637.3549  |
| 59440 | 10 | 10 | 27.9 | 6471 | 1 | 1 | 1 | 1036.5456 |
| 43168 | 9  | 9  | 35.9 | 86   | 1 | 1 | 0 | 383.2172  |
| 43168 | 9  | 9  | 35.9 | 310  | 1 | 1 | 1 | 437.2612  |
| 43168 | 9  | 9  | 35.9 | 582  | 1 | 1 | 0 | 490.2406  |
| 43168 | 9  | 9  | 35.9 | 1447 | 1 | 1 | 1 | 603.8086  |
| 43168 | 9  | 9  | 35.9 | 2346 | 1 | 1 | 0 | 727.3804  |
| 43168 | 9  | 9  | 35.9 | 2392 | 1 | 1 | 1 | 735.8709  |
| 43168 | 9  | 9  | 35.9 | 3254 | 1 | 1 | 1 | 905.4188  |
| 43168 | 9  | 9  | 35.9 | 4718 | 1 | 1 | 1 | 795.0948  |
| 58865 | 9  | 8  | 22.6 | 521  | 1 | 1 | 1 | 481.2715  |
| 58865 | 9  | 8  | 22.6 | 871  | 1 | 1 | 1 | 530.8057  |
| 58865 | 9  | 8  | 22.6 | 1492 | 1 | 1 | 1 | 609.8149  |
| 58865 | 9  | 8  | 22.6 | 1576 | 1 | 1 | 1 | 620.8195  |
| 58865 | 9  | 8  | 22.6 | 2179 | 1 | 1 | 1 | 702.3617  |
| 58865 | 9  | 8  | 22.6 | 3016 | 1 | 1 | 1 | 859.4503  |
| 58865 | 9  | 8  | 22.6 | 3577 | 1 | 1 | 1 | 965.0003  |
| 58865 | 9  | 8  | 22.6 | 6247 | 1 | 1 | 1 | 1206.6016 |
| 59235 | 8  | 7  | 20.3 | 1567 | 1 | 0 | 0 | 618.8135  |
| 59235 | 8  | 7  | 20.3 | 2045 | 1 | 0 | 0 | 685.3194  |
| 59235 | 8  | 7  | 20.3 | 2589 | 1 | 1 | 1 | 775.433   |
| 59235 | 8  | 7  | 20.3 | 2745 | 1 | 0 | 0 | 807.96    |
| 59235 | 8  | 7  | 20.3 | 2878 | 1 | 0 | 0 | 835.4185  |
| 59235 | 8  | 7  | 20.3 | 3756 | 1 | 1 | 1 | 669.7417  |
| 59235 | 8  | 7  | 20.3 | 5000 | 1 | 1 | 1 | 651.8488  |
| 86221 | 7  | 6  | 9.9  | 71   | 1 | 1 | 1 | 378.224   |
| 86221 | 7  | 6  | 9.9  | 756  | 1 | 1 | 1 | 513.8006  |
| 86221 | 7  | 6  | 9.9  | 1620 | 1 | 1 | 1 | 625.8222  |
| 86221 | 7  | 6  | 9.9  | 1908 | 1 | 1 | 1 | 665.8824  |
| 86221 | 7  | 6  | 9.9  | 3332 | 1 | 1 | 1 | 614.6477  |
| 86221 | 7  | 6  | 9.9  | 4582 | 1 | 1 | 1 | 1154.5838 |
| 65730 | 7  | 6  | 14.4 | 1029 | 1 | 1 | 1 | 551.7987  |
| 65730 | 7  | 6  | 14.4 | 1260 | 1 | 1 | 1 | 581.7688  |
| 65730 | 7  | 6  | 14.4 | 2184 | 1 | 1 | 1 | 702.8333  |

|        |    |   |      |      |   |   |   |           |
|--------|----|---|------|------|---|---|---|-----------|
| 65730  | 7  | 6 | 14.4 | 2212 | 1 | 1 | 1 | 706.8775  |
| 65730  | 7  | 6 | 14.4 | 3815 | 1 | 1 | 1 | 1019.9765 |
| 65730  | 7  | 6 | 14.4 | 4235 | 1 | 1 | 1 | 742.0655  |
| 42056  | 8  | 6 | 23.3 | 570  | 1 | 0 | 0 | 488.7278  |
| 42056  | 8  | 6 | 23.3 | 1130 | 1 | 1 | 0 | 566.7688  |
| 42056  | 8  | 6 | 23.3 | 1182 | 1 | 0 | 0 | 572.784   |
| 42056  | 8  | 6 | 23.3 | 1403 | 1 | 0 | 0 | 599.856   |
| 42056  | 8  | 6 | 23.3 | 3202 | 1 | 1 | 1 | 895.9476  |
| 42056  | 8  | 6 | 23.3 | 5757 | 1 | 0 | 0 | 1051.2178 |
| 48286  | 6  | 5 | 12.4 | 62   | 1 | 1 | 1 | 374.721   |
| 48286  | 6  | 5 | 12.4 | 322  | 1 | 1 | 1 | 441.7115  |
| 48286  | 6  | 5 | 12.4 | 1992 | 1 | 1 | 1 | 679.3157  |
| 48286  | 6  | 5 | 12.4 | 2191 | 1 | 1 | 1 | 704.3104  |
| 48286  | 6  | 5 | 12.4 | 3065 | 1 | 1 | 1 | 869.4277  |
| 137407 | 8  | 8 | 9.9  | 785  | 1 | 1 | 0 | 518.2811  |
| 137407 | 8  | 8 | 9.9  | 1436 | 1 | 1 | 0 | 603.2805  |
| 137407 | 8  | 8 | 9.9  | 2053 | 1 | 1 | 0 | 686.4033  |
| 137407 | 8  | 8 | 9.9  | 2396 | 1 | 1 | 1 | 736.908   |
| 137407 | 8  | 8 | 9.9  | 2578 | 1 | 1 | 1 | 772.8989  |
| 137407 | 8  | 8 | 9.9  | 2751 | 1 | 1 | 1 | 809.9276  |
| 137407 | 8  | 8 | 9.9  | 3227 | 1 | 1 | 0 | 900.4148  |
| 137407 | 8  | 8 | 9.9  | 5250 | 1 | 1 | 1 | 694.627   |
| 100826 | 10 | 9 | 16.2 | 1056 | 1 | 1 | 1 | 555.2738  |
| 100826 | 10 | 9 | 16.2 | 1198 | 1 | 1 | 1 | 574.8013  |
| 100826 | 10 | 9 | 16.2 | 1593 | 1 | 1 | 1 | 622.3533  |
| 100826 | 10 | 9 | 16.2 | 1727 | 1 | 1 | 1 | 640.3267  |
| 100826 | 10 | 9 | 16.2 | 2576 | 1 | 1 | 1 | 515.284   |
| 100826 | 10 | 9 | 16.2 | 3103 | 1 | 1 | 1 | 583.9995  |
| 100826 | 10 | 9 | 16.2 | 3820 | 1 | 1 | 1 | 1023.0549 |
| 100826 | 10 | 9 | 16.2 | 5508 | 1 | 1 | 1 | 968.1759  |
| 100826 | 10 | 9 | 16.2 | 5709 | 1 | 1 | 1 | 779.1663  |
| 120769 | 8  | 7 | 9    | 1555 | 1 | 1 | 1 | 617.3165  |
| 120769 | 8  | 7 | 9    | 1715 | 1 | 1 | 1 | 639.3391  |
| 120769 | 8  | 7 | 9    | 1736 | 1 | 1 | 1 | 641.3157  |
| 120769 | 8  | 7 | 9    | 2026 | 1 | 1 | 1 | 682.8436  |
| 120769 | 8  | 7 | 9    | 2209 | 1 | 1 | 1 | 706.3739  |
| 120769 | 8  | 7 | 9    | 2607 | 1 | 1 | 1 | 778.438   |
| 120769 | 8  | 7 | 9    | 4862 | 1 | 1 | 1 | 830.4461  |
| 64169  | 6  | 6 | 14.5 | 819  | 1 | 1 | 0 | 522.2954  |
| 64169  | 6  | 6 | 14.5 | 1345 | 1 | 1 | 0 | 591.8584  |
| 64169  | 6  | 6 | 14.5 | 1410 | 1 | 1 | 1 | 600.3347  |
| 64169  | 6  | 6 | 14.5 | 1732 | 1 | 1 | 0 | 640.8877  |
| 64169  | 6  | 6 | 14.5 | 2964 | 1 | 1 | 0 | 850.953   |
| 64169  | 6  | 6 | 14.5 | 4949 | 1 | 1 | 1 | 857.1423  |
| 39964  | 6  | 6 | 24   | 1395 | 1 | 0 | 0 | 597.3347  |
| 39964  | 6  | 6 | 24   | 1485 | 1 | 0 | 0 | 609.3057  |
| 39964  | 6  | 6 | 24   | 2245 | 1 | 0 | 0 | 712.3356  |
| 39964  | 6  | 6 | 24   | 2389 | 1 | 1 | 1 | 735.4063  |
| 39964  | 6  | 6 | 24   | 4281 | 1 | 1 | 1 | 1118.5755 |
| 39964  | 6  | 6 | 24   | 4406 | 1 | 1 | 1 | 1131.0428 |
| 44356  | 7  | 5 | 21.7 | 627  | 1 | 1 | 1 | 496.7491  |
| 44356  | 7  | 5 | 21.7 | 866  | 1 | 1 | 1 | 530.2747  |
| 44356  | 7  | 5 | 21.7 | 3582 | 1 | 1 | 1 | 967.4706  |
| 44356  | 7  | 5 | 21.7 | 4153 | 1 | 1 | 1 | 1101.5518 |
| 44356  | 7  | 5 | 21.7 | 6011 | 1 | 1 | 1 | 1119.867  |
| 66087  | 6  | 4 | 7.7  | 994  | 1 | 1 | 1 | 545.7729  |
| 66087  | 6  | 4 | 7.7  | 2574 | 1 | 1 | 1 | 772.3866  |
| 66087  | 6  | 4 | 7.7  | 2923 | 1 | 1 | 1 | 842.4802  |

|        |    |   |      |      |   |   |   |           |
|--------|----|---|------|------|---|---|---|-----------|
| 66087  | 6  | 4 | 7.7  | 4603 | 1 | 1 | 1 | 775.1005  |
| 194433 | 8  | 7 | 6.5  | 2035 | 1 | 1 | 0 | 683.8752  |
| 194433 | 8  | 7 | 6.5  | 2193 | 1 | 1 | 1 | 704.3596  |
| 194433 | 8  | 7 | 6.5  | 2295 | 1 | 1 | 0 | 718.3746  |
| 194433 | 8  | 7 | 6.5  | 2411 | 1 | 1 | 0 | 738.8933  |
| 194433 | 8  | 7 | 6.5  | 3787 | 1 | 1 | 0 | 675.6643  |
| 194433 | 8  | 7 | 6.5  | 3852 | 1 | 1 | 1 | 1029.54   |
| 194433 | 8  | 7 | 6.5  | 5060 | 1 | 1 | 0 | 888.1523  |
| 59765  | 10 | 8 | 22.1 | 569  | 1 | 1 | 1 | 488.2846  |
| 59765  | 10 | 8 | 22.1 | 1721 | 1 | 1 | 1 | 639.821   |
| 59765  | 10 | 8 | 22.1 | 2141 | 1 | 1 | 1 | 697.4114  |
| 59765  | 10 | 8 | 22.1 | 2257 | 1 | 1 | 1 | 713.3907  |
| 59765  | 10 | 8 | 22.1 | 2355 | 1 | 1 | 1 | 729.4236  |
| 59765  | 10 | 8 | 22.1 | 2448 | 1 | 1 | 1 | 746.8909  |
| 59765  | 10 | 8 | 22.1 | 3394 | 1 | 1 | 1 | 932.9753  |
| 59765  | 10 | 8 | 22.1 | 5755 | 1 | 1 | 1 | 1050.9179 |
| 17591  | 4  | 2 | 19.1 | 743  | 1 | 1 | 1 | 512.2987  |
| 17591  | 4  | 2 | 19.1 | 3908 | 1 | 1 | 1 | 1043.0374 |
| 59426  | 5  | 4 | 13.5 | 1462 | 1 | 1 | 1 | 605.8432  |
| 59426  | 5  | 4 | 13.5 | 3074 | 1 | 1 | 1 | 870.5068  |
| 59426  | 5  | 4 | 13.5 | 4464 | 1 | 1 | 1 | 1139.1612 |
| 59426  | 5  | 4 | 13.5 | 5012 | 1 | 1 | 1 | 874.1385  |
| 42064  | 7  | 5 | 22.3 | 570  | 1 | 0 | 0 | 488.7278  |
| 42064  | 7  | 5 | 22.3 | 1316 | 1 | 0 | 0 | 588.7714  |
| 42064  | 7  | 5 | 22.3 | 3178 | 1 | 0 | 0 | 887.9509  |
| 42064  | 7  | 5 | 22.3 | 3665 | 1 | 1 | 1 | 656.6983  |
| 42064  | 7  | 5 | 22.3 | 5759 | 1 | 0 | 1 | 1051.2183 |
| 23090  | 6  | 5 | 23.7 | 648  | 1 | 1 | 0 | 499.7845  |
| 23090  | 6  | 5 | 23.7 | 1394 | 1 | 1 | 0 | 398.544   |
| 23090  | 6  | 5 | 23.7 | 2182 | 1 | 1 | 1 | 702.404   |
| 23090  | 6  | 5 | 23.7 | 2612 | 1 | 1 | 1 | 520.6386  |
| 23090  | 6  | 5 | 23.7 | 2776 | 1 | 1 | 0 | 816.419   |
| 194402 | 7  | 6 | 5.8  | 2035 | 1 | 0 | 0 | 683.8752  |
| 194402 | 7  | 6 | 5.8  | 2295 | 1 | 0 | 0 | 718.3746  |
| 194402 | 7  | 6 | 5.8  | 2411 | 1 | 0 | 0 | 738.8933  |
| 194402 | 7  | 6 | 5.8  | 3787 | 1 | 0 | 0 | 675.6643  |
| 194402 | 7  | 6 | 5.8  | 3816 | 1 | 1 | 1 | 1020.5621 |
| 194402 | 7  | 6 | 5.8  | 5060 | 1 | 0 | 0 | 888.1523  |
| 52003  | 5  | 3 | 11.6 | 2884 | 1 | 1 | 1 | 837.9535  |
| 52003  | 5  | 3 | 11.6 | 3283 | 1 | 1 | 1 | 607.6081  |
| 52003  | 5  | 3 | 11.6 | 4854 | 1 | 1 | 1 | 1241.6743 |
| 63627  | 5  | 5 | 10.6 | 819  | 1 | 0 | 0 | 522.2954  |
| 63627  | 5  | 5 | 10.6 | 1345 | 1 | 0 | 0 | 591.8584  |
| 63627  | 5  | 5 | 10.6 | 1541 | 1 | 1 | 1 | 615.3529  |
| 63627  | 5  | 5 | 10.6 | 1732 | 1 | 0 | 0 | 640.8877  |
| 63627  | 5  | 5 | 10.6 | 2964 | 1 | 0 | 0 | 850.953   |
| 104379 | 6  | 5 | 6.5  | 606  | 1 | 1 | 1 | 493.7836  |
| 104379 | 6  | 5 | 6.5  | 726  | 1 | 1 | 1 | 509.3078  |
| 104379 | 6  | 5 | 6.5  | 1342 | 1 | 1 | 1 | 591.8143  |
| 104379 | 6  | 5 | 6.5  | 1921 | 1 | 1 | 1 | 668.3269  |
| 104379 | 6  | 5 | 6.5  | 3562 | 1 | 1 | 1 | 961.9813  |
| 41834  | 11 | 8 | 23.9 | 405  | 1 | 0 | 0 | 459.2943  |
| 41834  | 11 | 8 | 23.9 | 493  | 1 | 1 | 1 | 476.2481  |
| 41834  | 11 | 8 | 23.9 | 1532 | 1 | 1 | 1 | 614.8139  |
| 41834  | 11 | 8 | 23.9 | 2011 | 1 | 0 | 1 | 680.86    |
| 41834  | 11 | 8 | 23.9 | 2177 | 1 | 1 | 1 | 468.2528  |
| 41834  | 11 | 8 | 23.9 | 3831 | 1 | 1 | 1 | 1025.4918 |
| 41834  | 11 | 8 | 23.9 | 3922 | 1 | 1 | 1 | 697.7398  |

|        |    |   |      |      |   |   |   |           |
|--------|----|---|------|------|---|---|---|-----------|
| 153955 | 5  | 5 | 6.3  | 1778 | 1 | 1 | 1 | 648.4238  |
| 153955 | 5  | 5 | 6.3  | 3607 | 1 | 1 | 1 | 648.3701  |
| 153955 | 5  | 5 | 6.3  | 3796 | 1 | 1 | 1 | 1015.0708 |
| 153955 | 5  | 5 | 6.3  | 3874 | 1 | 1 | 1 | 690.051   |
| 153955 | 5  | 5 | 6.3  | 3883 | 1 | 1 | 1 | 1037.5673 |
| 146599 | 10 | 9 | 9.1  | 660  | 1 | 1 | 1 | 502.2514  |
| 146599 | 10 | 9 | 9.1  | 954  | 1 | 1 | 1 | 541.3217  |
| 146599 | 10 | 9 | 9.1  | 1061 | 1 | 1 | 1 | 555.7564  |
| 146599 | 10 | 9 | 9.1  | 1882 | 1 | 1 | 0 | 663.3387  |
| 146599 | 10 | 9 | 9.1  | 1971 | 1 | 1 | 1 | 674.3398  |
| 146599 | 10 | 9 | 9.1  | 2150 | 1 | 1 | 1 | 698.3529  |
| 146599 | 10 | 9 | 9.1  | 2799 | 1 | 1 | 1 | 821.3821  |
| 146599 | 10 | 9 | 9.1  | 3208 | 1 | 1 | 0 | 897.5034  |
| 146599 | 10 | 9 | 9.1  | 5098 | 1 | 1 | 1 | 896.8286  |
| 94470  | 5  | 5 | 8.5  | 1322 | 1 | 1 | 0 | 589.3142  |
| 94470  | 5  | 5 | 8.5  | 2436 | 1 | 1 | 1 | 742.9581  |
| 94470  | 5  | 5 | 8.5  | 2762 | 1 | 1 | 1 | 812.4234  |
| 94470  | 5  | 5 | 8.5  | 3683 | 1 | 1 | 1 | 988.9768  |
| 94470  | 5  | 5 | 8.5  | 3774 | 1 | 1 | 0 | 672.3501  |
| 114752 | 7  | 6 | 9.2  | 82   | 1 | 1 | 1 | 380.2398  |
| 114752 | 7  | 6 | 9.2  | 1036 | 1 | 1 | 1 | 552.3058  |
| 114752 | 7  | 6 | 9.2  | 2596 | 1 | 1 | 1 | 776.4001  |
| 114752 | 7  | 6 | 9.2  | 3937 | 1 | 1 | 1 | 700.0427  |
| 114752 | 7  | 6 | 9.2  | 4063 | 1 | 1 | 1 | 1082.0625 |
| 114752 | 7  | 6 | 9.2  | 4962 | 1 | 1 | 1 | 1290.657  |
| 44974  | 4  | 3 | 11.4 | 2077 | 1 | 1 | 1 | 690.3608  |
| 44974  | 4  | 3 | 11.4 | 2580 | 1 | 1 | 1 | 773.898   |
| 44974  | 4  | 3 | 11.4 | 4051 | 1 | 1 | 1 | 1079.4988 |
| 81293  | 9  | 9 | 17.7 | 403  | 1 | 1 | 1 | 458.7844  |
| 81293  | 9  | 9 | 17.7 | 422  | 1 | 1 | 1 | 464.7769  |
| 81293  | 9  | 9 | 17.7 | 526  | 1 | 1 | 1 | 481.7688  |
| 81293  | 9  | 9 | 17.7 | 857  | 1 | 1 | 1 | 528.2959  |
| 81293  | 9  | 9 | 17.7 | 1641 | 1 | 1 | 1 | 629.327   |
| 81293  | 9  | 9 | 17.7 | 1929 | 1 | 1 | 1 | 668.8898  |
| 81293  | 9  | 9 | 17.7 | 2537 | 1 | 1 | 1 | 765.4142  |
| 81293  | 9  | 9 | 17.7 | 4044 | 1 | 1 | 1 | 718.7029  |
| 81293  | 9  | 9 | 17.7 | 6335 | 1 | 1 | 1 | 1013.4987 |
| 47005  | 5  | 4 | 13.4 | 490  | 1 | 1 | 1 | 475.7688  |
| 47005  | 5  | 4 | 13.4 | 2360 | 1 | 1 | 1 | 730.3914  |
| 47005  | 5  | 4 | 13.4 | 3636 | 1 | 1 | 1 | 981.4902  |
| 47005  | 5  | 4 | 13.4 | 3935 | 1 | 1 | 1 | 524.7987  |
| 59860  | 4  | 4 | 11.8 | 858  | 1 | 1 | 1 | 528.8062  |
| 59860  | 4  | 4 | 11.8 | 1112 | 1 | 1 | 1 | 563.7633  |
| 59860  | 4  | 4 | 11.8 | 3078 | 1 | 1 | 1 | 870.9857  |
| 59860  | 4  | 4 | 11.8 | 5136 | 1 | 1 | 1 | 903.7724  |
| 72129  | 4  | 3 | 7.3  | 2730 | 1 | 1 | 1 | 803.4274  |
| 72129  | 4  | 3 | 7.3  | 3172 | 1 | 1 | 1 | 886.0194  |
| 72129  | 4  | 3 | 7.3  | 3567 | 1 | 1 | 1 | 963.0166  |
| 45894  | 6  | 6 | 18.6 | 1244 | 1 | 0 | 0 | 579.8293  |
| 45894  | 6  | 6 | 18.6 | 1692 | 1 | 1 | 1 | 636.3461  |
| 45894  | 6  | 6 | 18.6 | 2234 | 1 | 1 | 1 | 474.2804  |
| 45894  | 6  | 6 | 18.6 | 3795 | 1 | 1 | 1 | 1015.0336 |
| 45894  | 6  | 6 | 18.6 | 4009 | 1 | 1 | 1 | 714.6788  |
| 45894  | 6  | 6 | 18.6 | 4630 | 1 | 1 | 1 | 781.0943  |
| 60195  | 4  | 3 | 11.3 | 1580 | 1 | 1 | 1 | 621.2915  |
| 60195  | 4  | 3 | 11.3 | 4477 | 1 | 1 | 1 | 1140.5836 |
| 60195  | 4  | 3 | 11.3 | 5732 | 1 | 1 | 1 | 1045.8563 |
| 100452 | 5  | 4 | 5.9  | 918  | 1 | 1 | 1 | 537.2875  |

|        |   |   |      |      |   |   |   |           |
|--------|---|---|------|------|---|---|---|-----------|
| 100452 | 5 | 4 | 5.9  | 1241 | 1 | 1 | 1 | 579.8095  |
| 100452 | 5 | 4 | 5.9  | 1789 | 1 | 1 | 1 | 650.385   |
| 100452 | 5 | 4 | 5.9  | 4162 | 1 | 1 | 1 | 735.4006  |
| 90209  | 6 | 6 | 11.5 | 1346 | 1 | 1 | 1 | 592.3035  |
| 90209  | 6 | 6 | 11.5 | 1400 | 1 | 1 | 1 | 599.2985  |
| 90209  | 6 | 6 | 11.5 | 1831 | 1 | 1 | 1 | 437.5533  |
| 90209  | 6 | 6 | 11.5 | 4168 | 1 | 1 | 1 | 1104.0207 |
| 90209  | 6 | 6 | 11.5 | 4612 | 1 | 1 | 1 | 776.4031  |
| 90209  | 6 | 6 | 11.5 | 4761 | 1 | 1 | 1 | 1204.1296 |
| 116657 | 5 | 4 | 6.4  | 1591 | 1 | 1 | 1 | 622.3354  |
| 116657 | 5 | 4 | 6.4  | 2102 | 1 | 1 | 0 | 692.3505  |
| 116657 | 5 | 4 | 6.4  | 4206 | 1 | 1 | 0 | 739.7751  |
| 116657 | 5 | 4 | 6.4  | 4574 | 1 | 1 | 0 | 1152.0992 |
| 16590  | 6 | 3 | 31.8 | 4686 | 1 | 1 | 1 | 1182.1366 |
| 16590  | 6 | 3 | 31.8 | 4940 | 1 | 1 | 1 | 854.8044  |
| 16590  | 6 | 3 | 31.8 | 5330 | 1 | 1 | 1 | 936.4584  |
| 86932  | 7 | 5 | 6.7  | 574  | 1 | 1 | 1 | 488.7829  |
| 86932  | 7 | 5 | 6.7  | 769  | 1 | 1 | 1 | 515.7984  |
| 86932  | 7 | 5 | 6.7  | 2096 | 1 | 1 | 1 | 691.8487  |
| 86932  | 7 | 5 | 6.7  | 2845 | 1 | 1 | 1 | 553.9795  |
| 86932  | 7 | 5 | 6.7  | 2933 | 1 | 1 | 1 | 844.4745  |
| 109501 | 6 | 6 | 6.7  | 251  | 1 | 1 | 1 | 429.235   |
| 109501 | 6 | 6 | 6.7  | 516  | 1 | 1 | 1 | 480.7975  |
| 109501 | 6 | 6 | 6.7  | 682  | 1 | 1 | 1 | 503.7876  |
| 109501 | 6 | 6 | 6.7  | 792  | 1 | 1 | 1 | 518.7826  |
| 109501 | 6 | 6 | 6.7  | 2439 | 1 | 1 | 1 | 743.9272  |
| 109501 | 6 | 6 | 6.7  | 3091 | 1 | 1 | 1 | 874.4517  |
| 80376  | 7 | 6 | 9.9  | 16   | 1 | 1 | 1 | 357.7287  |
| 80376  | 7 | 6 | 9.9  | 1637 | 1 | 1 | 0 | 628.8513  |
| 80376  | 7 | 6 | 9.9  | 1761 | 1 | 1 | 0 | 646.3249  |
| 80376  | 7 | 6 | 9.9  | 1866 | 1 | 1 | 0 | 660.8332  |
| 80376  | 7 | 6 | 9.9  | 2533 | 1 | 1 | 1 | 764.4041  |
| 80376  | 7 | 6 | 9.9  | 2671 | 1 | 1 | 1 | 528.6014  |
| 47042  | 5 | 3 | 16.7 | 890  | 1 | 1 | 1 | 533.3026  |
| 47042  | 5 | 3 | 16.7 | 5633 | 1 | 1 | 1 | 1007.7668 |
| 47042  | 5 | 3 | 16.7 | 6170 | 1 | 1 | 1 | 858.9372  |
| 40903  | 3 | 2 | 8.3  | 2747 | 1 | 1 | 1 | 808.4265  |
| 40903  | 3 | 2 | 8.3  | 3129 | 1 | 1 | 1 | 881.4459  |
| 99776  | 3 | 3 | 6    | 2748 | 1 | 1 | 1 | 808.4561  |
| 99776  | 3 | 3 | 6    | 3398 | 1 | 1 | 1 | 933.5582  |
| 99776  | 3 | 3 | 6    | 4614 | 1 | 1 | 1 | 776.4273  |
| 65977  | 5 | 5 | 9.7  | 1331 | 1 | 1 | 1 | 591.2931  |
| 65977  | 5 | 5 | 9.7  | 1763 | 1 | 1 | 1 | 646.7922  |
| 65977  | 5 | 5 | 9.7  | 2536 | 1 | 1 | 1 | 765.411   |
| 65977  | 5 | 5 | 9.7  | 2561 | 1 | 1 | 1 | 768.9846  |
| 65977  | 5 | 5 | 9.7  | 4537 | 1 | 1 | 1 | 765.1225  |
| 59477  | 4 | 4 | 13.4 | 831  | 1 | 1 | 1 | 523.8138  |
| 59477  | 4 | 4 | 13.4 | 2610 | 1 | 1 | 1 | 778.8889  |
| 59477  | 4 | 4 | 13.4 | 3363 | 1 | 1 | 1 | 928.0329  |
| 59477  | 4 | 4 | 13.4 | 5809 | 1 | 1 | 1 | 1068.2233 |
| 42230  | 6 | 6 | 23   | 1243 | 1 | 1 | 1 | 579.8277  |
| 42230  | 6 | 6 | 23   | 1619 | 1 | 1 | 1 | 625.3134  |
| 42230  | 6 | 6 | 23   | 2266 | 1 | 1 | 1 | 714.4033  |
| 42230  | 6 | 6 | 23   | 2841 | 1 | 1 | 1 | 828.9567  |
| 42230  | 6 | 6 | 23   | 4814 | 1 | 1 | 1 | 815.4697  |
| 45049  | 7 | 7 | 18.7 | 759  | 1 | 1 | 1 | 514.3112  |
| 45049  | 7 | 7 | 18.7 | 862  | 1 | 1 | 1 | 529.3344  |
| 45049  | 7 | 7 | 18.7 | 928  | 1 | 1 | 1 | 538.3033  |

|        |   |   |      |      |   |   |   |           |
|--------|---|---|------|------|---|---|---|-----------|
| 45049  | 7 | 7 | 18.7 | 1119 | 1 | 1 | 1 | 564.8042  |
| 45049  | 7 | 7 | 18.7 | 1126 | 1 | 1 | 1 | 566.2852  |
| 45049  | 7 | 7 | 18.7 | 1460 | 1 | 1 | 1 | 404.2228  |
| 45049  | 7 | 7 | 18.7 | 2522 | 1 | 1 | 1 | 762.9067  |
| 71322  | 4 | 4 | 7.2  | 643  | 1 | 1 | 1 | 498.8136  |
| 71322  | 4 | 4 | 7.2  | 669  | 1 | 1 | 1 | 502.7982  |
| 71322  | 4 | 4 | 7.2  | 2216 | 1 | 1 | 1 | 707.867   |
| 71322  | 4 | 4 | 7.2  | 3447 | 1 | 1 | 1 | 941.4749  |
| 137563 | 5 | 5 | 5.6  | 785  | 1 | 0 | 0 | 518.2811  |
| 137563 | 5 | 5 | 5.6  | 1436 | 1 | 0 | 0 | 603.2805  |
| 137563 | 5 | 5 | 5.6  | 2053 | 1 | 0 | 0 | 686.4033  |
| 137563 | 5 | 5 | 5.6  | 2797 | 1 | 1 | 1 | 820.429   |
| 137563 | 5 | 5 | 5.6  | 3227 | 1 | 0 | 0 | 900.4148  |
| 114571 | 7 | 7 | 8.4  | 830  | 1 | 1 | 1 | 523.8063  |
| 114571 | 7 | 7 | 8.4  | 1377 | 1 | 1 | 1 | 595.8301  |
| 114571 | 7 | 7 | 8.4  | 2364 | 1 | 1 | 1 | 730.8725  |
| 114571 | 7 | 7 | 8.4  | 2508 | 1 | 1 | 1 | 760.3985  |
| 114571 | 7 | 7 | 8.4  | 3354 | 1 | 1 | 1 | 925.4242  |
| 114571 | 7 | 7 | 8.4  | 3750 | 1 | 1 | 1 | 669.3185  |
| 114571 | 7 | 7 | 8.4  | 3917 | 1 | 1 | 1 | 697.0231  |
| 44425  | 6 | 4 | 16.8 | 579  | 1 | 1 | 1 | 489.7664  |
| 44425  | 6 | 4 | 16.8 | 2540 | 1 | 1 | 1 | 766.3656  |
| 44425  | 6 | 4 | 16.8 | 2920 | 1 | 1 | 1 | 841.9239  |
| 44425  | 6 | 4 | 16.8 | 5683 | 1 | 1 | 1 | 1026.5204 |
| 62339  | 4 | 4 | 7.9  | 715  | 1 | 1 | 1 | 508.7663  |
| 62339  | 4 | 4 | 7.9  | 1399 | 1 | 1 | 1 | 598.8713  |
| 62339  | 4 | 4 | 7.9  | 1678 | 1 | 1 | 1 | 634.2916  |
| 62339  | 4 | 4 | 7.9  | 2490 | 1 | 1 | 1 | 754.8864  |
| 59751  | 5 | 5 | 15.4 | 1998 | 1 | 1 | 1 | 679.4079  |
| 59751  | 5 | 5 | 15.4 | 2045 | 1 | 0 | 0 | 685.3194  |
| 59751  | 5 | 5 | 15.4 | 2534 | 1 | 1 | 1 | 764.4533  |
| 59751  | 5 | 5 | 15.4 | 3568 | 1 | 1 | 1 | 642.3981  |
| 59751  | 5 | 5 | 15.4 | 5623 | 1 | 1 | 1 | 999.1469  |
| 182693 | 3 | 3 | 2.7  | 1073 | 1 | 1 | 1 | 557.3293  |
| 182693 | 3 | 3 | 2.7  | 3277 | 1 | 1 | 1 | 908.4752  |
| 182693 | 3 | 3 | 2.7  | 3996 | 1 | 1 | 1 | 712.6739  |
| 20970  | 3 | 3 | 18.2 | 224  | 1 | 1 | 1 | 422.2496  |
| 20970  | 3 | 3 | 18.2 | 1336 | 1 | 1 | 1 | 591.3534  |
| 20970  | 3 | 3 | 18.2 | 2591 | 1 | 1 | 1 | 775.8853  |
| 67582  | 5 | 5 | 9.1  | 1015 | 1 | 1 | 1 | 549.8008  |
| 67582  | 5 | 5 | 9.1  | 1184 | 1 | 1 | 1 | 572.8359  |
| 67582  | 5 | 5 | 9.1  | 1348 | 1 | 1 | 1 | 592.3197  |
| 67582  | 5 | 5 | 9.1  | 1652 | 1 | 1 | 1 | 630.8449  |
| 67582  | 5 | 5 | 9.1  | 1905 | 1 | 1 | 1 | 665.8611  |
| 97167  | 4 | 4 | 7.5  | 854  | 1 | 1 | 1 | 527.7979  |
| 97167  | 4 | 4 | 7.5  | 1924 | 1 | 1 | 1 | 668.3489  |
| 97167  | 4 | 4 | 7.5  | 2806 | 1 | 1 | 1 | 822.4251  |
| 97167  | 4 | 4 | 7.5  | 5156 | 1 | 1 | 1 | 908.825   |
| 99113  | 4 | 4 | 6.3  | 1599 | 1 | 1 | 1 | 622.8945  |
| 99113  | 4 | 4 | 6.3  | 1775 | 1 | 1 | 1 | 647.8632  |
| 99113  | 4 | 4 | 6.3  | 2275 | 1 | 1 | 1 | 716.8451  |
| 99113  | 4 | 4 | 6.3  | 4657 | 1 | 1 | 1 | 784.1331  |
| 57763  | 5 | 4 | 13.1 | 1865 | 1 | 1 | 1 | 440.8813  |
| 57763  | 5 | 4 | 13.1 | 2605 | 1 | 1 | 1 | 778.3968  |
| 57763  | 5 | 4 | 13.1 | 3576 | 1 | 1 | 1 | 643.6543  |
| 57763  | 5 | 4 | 13.1 | 4908 | 1 | 1 | 1 | 841.4657  |
| 45355  | 2 | 2 | 4.6  | 3360 | 1 | 1 | 1 | 927.0351  |
| 45355  | 2 | 2 | 4.6  | 3759 | 1 | 1 | 1 | 670.3928  |

|        |   |   |      |      |   |   |   |          |
|--------|---|---|------|------|---|---|---|----------|
| 116128 | 4 | 2 | 3.4  | 3200 | 1 | 1 | 1 | 895.0222 |
| 116128 | 4 | 2 | 3.4  | 4592 | 1 | 1 | 1 | 771.7957 |
| 31696  | 5 | 5 | 20.6 | 485  | 1 | 1 | 1 | 475.277  |
| 31696  | 5 | 5 | 20.6 | 868  | 1 | 1 | 1 | 530.7597 |
| 31696  | 5 | 5 | 20.6 | 1498 | 1 | 1 | 1 | 610.3319 |
| 31696  | 5 | 5 | 20.6 | 2198 | 1 | 1 | 1 | 704.883  |
| 31696  | 5 | 5 | 20.6 | 3335 | 1 | 1 | 1 | 922.4784 |
| 82214  | 2 | 2 | 3.9  | 1948 | 1 | 1 | 1 | 671.3858 |
| 82214  | 2 | 2 | 3.9  | 2778 | 1 | 1 | 1 | 816.4405 |
| 59195  | 3 | 2 | 8.8  | 3598 | 1 | 1 | 1 | 970.5361 |
| 59195  | 3 | 2 | 8.8  | 5584 | 1 | 1 | 1 | 987.4999 |
| 110942 | 6 | 6 | 8.8  | 324  | 1 | 1 | 1 | 441.7271 |
| 110942 | 6 | 6 | 8.8  | 1538 | 1 | 1 | 1 | 615.2933 |
| 110942 | 6 | 6 | 8.8  | 1543 | 1 | 1 | 1 | 615.3661 |
| 110942 | 6 | 6 | 8.8  | 2156 | 1 | 1 | 1 | 698.8695 |
| 110942 | 6 | 6 | 8.8  | 3705 | 1 | 1 | 1 | 662.0159 |
| 110942 | 6 | 6 | 8.8  | 5497 | 1 | 1 | 1 | 966.4945 |
| 17118  | 3 | 2 | 14.5 | 3282 | 1 | 1 | 1 | 910.4538 |
| 17118  | 3 | 2 | 14.5 | 4770 | 1 | 1 | 1 | 804.0769 |
| 44788  | 4 | 3 | 10.3 | 782  | 1 | 1 | 1 | 517.7686 |
| 44788  | 4 | 3 | 10.3 | 2316 | 1 | 1 | 1 | 722.8315 |
| 44788  | 4 | 3 | 10.3 | 3388 | 1 | 1 | 1 | 621.3604 |
| 53612  | 3 | 2 | 6.8  | 807  | 1 | 1 | 1 | 520.3109 |
| 53612  | 3 | 2 | 6.8  | 5049 | 1 | 1 | 1 | 885.1406 |
| 77064  | 5 | 5 | 8.4  | 296  | 1 | 1 | 0 | 435.7739 |
| 77064  | 5 | 5 | 8.4  | 696  | 1 | 1 | 1 | 505.8032 |
| 77064  | 5 | 5 | 8.4  | 2370 | 1 | 1 | 0 | 731.3877 |
| 77064  | 5 | 5 | 8.4  | 2660 | 1 | 0 | 0 | 790.4075 |
| 77064  | 5 | 5 | 8.4  | 3108 | 1 | 1 | 1 | 876.4499 |
| 32347  | 3 | 3 | 11.7 | 1797 | 1 | 1 | 1 | 651.3582 |
| 32347  | 3 | 3 | 11.7 | 1814 | 1 | 1 | 1 | 654.3278 |
| 32347  | 3 | 3 | 11.7 | 2057 | 1 | 1 | 1 | 687.3455 |
| 71262  | 3 | 3 | 6.9  | 2353 | 1 | 1 | 1 | 728.8909 |
| 71262  | 3 | 3 | 6.9  | 2583 | 1 | 1 | 1 | 774.9047 |
| 71262  | 3 | 3 | 6.9  | 2611 | 1 | 1 | 1 | 779.9436 |
| 31671  | 4 | 4 | 18.2 | 929  | 1 | 1 | 1 | 538.761  |
| 31671  | 4 | 4 | 18.2 | 2299 | 1 | 1 | 1 | 719.3844 |
| 31671  | 4 | 4 | 18.2 | 2376 | 1 | 1 | 1 | 733.3938 |
| 31671  | 4 | 4 | 18.2 | 2734 | 1 | 1 | 1 | 805.4057 |
| 123905 | 5 | 5 | 5    | 253  | 1 | 1 | 1 | 429.2454 |
| 123905 | 5 | 5 | 5    | 817  | 1 | 1 | 1 | 522.2853 |
| 123905 | 5 | 5 | 5    | 1566 | 1 | 1 | 1 | 618.7969 |
| 123905 | 5 | 5 | 5    | 1945 | 1 | 1 | 1 | 671.3379 |
| 123905 | 5 | 5 | 5    | 2879 | 1 | 1 | 1 | 836.4706 |
| 271827 | 5 | 5 | 3.1  | 580  | 1 | 1 | 1 | 489.7729 |
| 271827 | 5 | 5 | 3.1  | 3006 | 1 | 1 | 1 | 858.509  |
| 271827 | 5 | 5 | 3.1  | 3185 | 1 | 1 | 1 | 593.9914 |
| 271827 | 5 | 5 | 3.1  | 3190 | 1 | 1 | 1 | 891.5072 |
| 271827 | 5 | 5 | 3.1  | 4768 | 1 | 1 | 1 | 803.773  |
| 109254 | 6 | 5 | 5.9  | 147  | 1 | 1 | 1 | 400.2556 |
| 109254 | 6 | 5 | 5.9  | 915  | 1 | 1 | 1 | 536.8293 |
| 109254 | 6 | 5 | 5.9  | 1534 | 1 | 1 | 0 | 410.2317 |
| 109254 | 6 | 5 | 5.9  | 2742 | 1 | 1 | 0 | 807.4354 |
| 109254 | 6 | 5 | 5.9  | 3373 | 1 | 1 | 0 | 619.6582 |
| 264216 | 3 | 2 | 1.3  | 2658 | 1 | 1 | 1 | 790.3574 |
| 264216 | 3 | 2 | 1.3  | 3612 | 1 | 1 | 1 | 973.0231 |
| 73187  | 6 | 4 | 8.2  | 1341 | 1 | 1 | 1 | 591.3663 |
| 73187  | 6 | 4 | 8.2  | 1559 | 1 | 1 | 1 | 617.352  |

|        |   |   |      |      |   |   |   |           |
|--------|---|---|------|------|---|---|---|-----------|
| 73187  | 6 | 4 | 8.2  | 2359 | 1 | 1 | 1 | 730.3874  |
| 73187  | 6 | 4 | 8.2  | 3451 | 1 | 1 | 1 | 628.0395  |
| 406216 | 2 | 2 | 0.7  | 1748 | 1 | 1 | 1 | 643.392   |
| 406216 | 2 | 2 | 0.7  | 2597 | 1 | 1 | 1 | 776.4609  |
| 79562  | 4 | 2 | 5.2  | 3004 | 1 | 1 | 1 | 572.6418  |
| 79562  | 4 | 2 | 5.2  | 4672 | 1 | 1 | 1 | 1178.5791 |
| 47357  | 3 | 3 | 10.9 | 1684 | 1 | 1 | 1 | 634.8097  |
| 47357  | 3 | 3 | 10.9 | 3621 | 1 | 1 | 1 | 975.4362  |
| 47357  | 3 | 3 | 10.9 | 4221 | 1 | 1 | 1 | 1110.5721 |
| 105384 | 3 | 3 | 7.4  | 3255 | 1 | 1 | 1 | 604.0026  |
| 105384 | 3 | 3 | 7.4  | 3413 | 1 | 1 | 1 | 936.9776  |
| 105384 | 3 | 3 | 7.4  | 6329 | 1 | 1 | 1 | 1342.6817 |
| 57853  | 2 | 2 | 6.6  | 3121 | 1 | 1 | 1 | 879.9961  |
| 57853  | 2 | 2 | 6.6  | 3661 | 1 | 1 | 1 | 656.341   |
| 119640 | 3 | 3 | 3.7  | 1161 | 1 | 1 | 1 | 570.3608  |
| 119640 | 3 | 3 | 3.7  | 2219 | 1 | 1 | 1 | 708.3979  |
| 119640 | 3 | 3 | 3.7  | 3633 | 1 | 1 | 1 | 653.6644  |
| 17889  | 3 | 3 | 26.9 | 592  | 1 | 1 | 1 | 491.2922  |
| 17889  | 3 | 3 | 26.9 | 3138 | 1 | 1 | 1 | 882.4487  |
| 17889  | 3 | 3 | 26.9 | 3967 | 1 | 1 | 1 | 705.3912  |
| 55890  | 6 | 6 | 13.1 | 364  | 1 | 1 | 1 | 303.1904  |
| 55890  | 6 | 6 | 13.1 | 527  | 1 | 1 | 1 | 481.769   |
| 55890  | 6 | 6 | 13.1 | 808  | 1 | 1 | 1 | 520.311   |
| 55890  | 6 | 6 | 13.1 | 1064 | 1 | 1 | 1 | 556.7725  |
| 55890  | 6 | 6 | 13.1 | 2587 | 1 | 1 | 1 | 517.2874  |
| 55890  | 6 | 6 | 13.1 | 3797 | 1 | 1 | 1 | 1015.4575 |
| 19009  | 2 | 2 | 14.6 | 1642 | 1 | 1 | 1 | 629.374   |
| 19009  | 2 | 2 | 14.6 | 2109 | 1 | 1 | 1 | 692.8594  |
| 89064  | 3 | 3 | 6.3  | 2438 | 1 | 1 | 1 | 743.3796  |
| 89064  | 3 | 3 | 6.3  | 3754 | 1 | 1 | 1 | 1003.9864 |
| 89064  | 3 | 3 | 6.3  | 3781 | 1 | 1 | 1 | 1009.5239 |
| 92207  | 3 | 3 | 4.1  | 575  | 1 | 1 | 1 | 489.2616  |
| 92207  | 3 | 3 | 4.1  | 1542 | 1 | 1 | 1 | 615.3585  |
| 92207  | 3 | 3 | 4.1  | 2630 | 1 | 1 | 1 | 784.4745  |
| 109365 | 5 | 4 | 5.1  | 796  | 1 | 1 | 1 | 519.2666  |
| 109365 | 5 | 4 | 5.1  | 1534 | 1 | 0 | 0 | 410.2317  |
| 109365 | 5 | 4 | 5.1  | 2742 | 1 | 0 | 0 | 807.4354  |
| 109365 | 5 | 4 | 5.1  | 3373 | 1 | 0 | 0 | 619.6582  |
| 22118  | 4 | 3 | 17   | 341  | 1 | 1 | 1 | 449.7536  |
| 22118  | 4 | 3 | 17   | 1299 | 1 | 1 | 1 | 585.8054  |
| 22118  | 4 | 3 | 17   | 2669 | 1 | 1 | 1 | 791.9302  |
| 8974   | 3 | 2 | 33.8 | 5020 | 1 | 1 | 1 | 876.3576  |
| 8974   | 3 | 2 | 33.8 | 5502 | 1 | 1 | 1 | 968.0786  |
| 18045  | 3 | 2 | 16.9 | 1683 | 1 | 1 | 1 | 634.4024  |
| 18045  | 3 | 2 | 16.9 | 2929 | 1 | 1 | 1 | 844.405   |
| 112934 | 4 | 4 | 7    | 1000 | 1 | 1 | 1 | 546.8061  |
| 112934 | 4 | 4 | 7    | 2850 | 1 | 1 | 1 | 554.6383  |
| 112934 | 4 | 4 | 7    | 4071 | 1 | 1 | 1 | 1084.0609 |
| 112934 | 4 | 4 | 7    | 5679 | 1 | 1 | 1 | 1025.8601 |
| 69692  | 2 | 2 | 4.3  | 1369 | 1 | 1 | 1 | 594.8348  |
| 69692  | 2 | 2 | 4.3  | 3089 | 1 | 1 | 1 | 874.4459  |
| 118478 | 4 | 4 | 6.4  | 2044 | 1 | 1 | 1 | 684.8439  |
| 118478 | 4 | 4 | 6.4  | 2210 | 1 | 1 | 1 | 471.2746  |
| 118478 | 4 | 4 | 6.4  | 3033 | 1 | 1 | 1 | 862.0163  |
| 118478 | 4 | 4 | 6.4  | 5716 | 1 | 1 | 1 | 1040.5776 |
| 27673  | 3 | 3 | 13.2 | 143  | 1 | 1 | 1 | 399.7633  |
| 27673  | 3 | 3 | 13.2 | 1756 | 1 | 1 | 1 | 644.8368  |
| 27673  | 3 | 3 | 13.2 | 2246 | 1 | 1 | 1 | 712.3366  |

|        |   |   |      |      |   |   |   |           |
|--------|---|---|------|------|---|---|---|-----------|
| 50306  | 2 | 2 | 8.8  | 3583 | 1 | 1 | 1 | 967.5197  |
| 20667  | 3 | 2 | 21   | 3919 | 1 | 1 | 1 | 697.3696  |
| 20667  | 3 | 2 | 21   | 4794 | 1 | 1 | 1 | 808.7273  |
| 67813  | 3 | 3 | 5.8  | 841  | 1 | 1 | 1 | 525.2668  |
| 67813  | 3 | 3 | 5.8  | 1527 | 1 | 1 | 1 | 613.8585  |
| 67813  | 3 | 3 | 5.8  | 3113 | 1 | 1 | 1 | 877.4859  |
| 40331  | 3 | 3 | 11.1 | 1372 | 1 | 1 | 1 | 595.3244  |
| 40331  | 3 | 3 | 11.1 | 1956 | 1 | 1 | 1 | 672.3613  |
| 40331  | 3 | 3 | 11.1 | 1987 | 1 | 1 | 1 | 676.825   |
| 38472  | 2 | 2 | 8.5  | 2263 | 1 | 1 | 1 | 713.8857  |
| 38472  | 2 | 2 | 8.5  | 3127 | 1 | 1 | 1 | 880.9543  |
| 48086  | 2 | 2 | 6.9  | 2110 | 1 | 1 | 1 | 692.8926  |
| 48086  | 2 | 2 | 6.9  | 3180 | 1 | 1 | 1 | 888.9577  |
| 196586 | 3 | 3 | 2.6  | 1428 | 1 | 1 | 1 | 601.8477  |
| 196586 | 3 | 3 | 2.6  | 2559 | 1 | 1 | 1 | 768.4802  |
| 196586 | 3 | 3 | 2.6  | 4115 | 1 | 1 | 1 | 729.7449  |
| 39436  | 3 | 3 | 9.9  | 1380 | 1 | 1 | 1 | 596.3047  |
| 39436  | 3 | 3 | 9.9  | 1676 | 1 | 1 | 1 | 633.8746  |
| 39436  | 3 | 3 | 9.9  | 2496 | 1 | 1 | 1 | 757.4147  |
| 16320  | 3 | 3 | 23.3 | 853  | 1 | 1 | 1 | 527.7848  |
| 16320  | 3 | 3 | 23.3 | 1239 | 1 | 1 | 1 | 579.3298  |
| 16320  | 3 | 3 | 23.3 | 2312 | 1 | 1 | 1 | 722.3691  |
| 28210  | 3 | 3 | 11.2 | 72   | 1 | 1 | 0 | 378.2605  |
| 28210  | 3 | 3 | 11.2 | 95   | 1 | 1 | 0 | 387.7652  |
| 28210  | 3 | 3 | 11.2 | 2637 | 1 | 1 | 1 | 786.4355  |
| 39816  | 2 | 2 | 10.4 | 1256 | 1 | 1 | 1 | 580.8429  |
| 39816  | 2 | 2 | 10.4 | 5538 | 1 | 1 | 1 | 975.8522  |
| 30915  | 2 | 2 | 13.5 | 3618 | 1 | 1 | 1 | 973.9824  |
| 30915  | 2 | 2 | 13.5 | 4116 | 1 | 1 | 1 | 730.0899  |
| 52204  | 2 | 2 | 5.8  | 1180 | 1 | 1 | 1 | 571.8483  |
| 52204  | 2 | 2 | 5.8  | 3309 | 1 | 1 | 1 | 917.4202  |
| 117180 | 2 | 2 | 2.9  | 1234 | 1 | 1 | 1 | 578.856   |
| 117180 | 2 | 2 | 2.9  | 4102 | 1 | 1 | 1 | 728.4026  |
| 50747  | 3 | 3 | 10   | 1123 | 1 | 1 | 1 | 565.7932  |
| 50747  | 3 | 3 | 10   | 1636 | 1 | 1 | 1 | 628.8384  |
| 50747  | 3 | 3 | 10   | 4840 | 1 | 1 | 1 | 1237.659  |
| 62798  | 4 | 4 | 9.4  | 1322 | 1 | 0 | 0 | 589.3142  |
| 62798  | 4 | 4 | 9.4  | 1784 | 1 | 1 | 1 | 649.8478  |
| 62798  | 4 | 4 | 9.4  | 2473 | 1 | 1 | 1 | 750.9555  |
| 62798  | 4 | 4 | 9.4  | 3774 | 1 | 0 | 0 | 672.3501  |
| 166282 | 3 | 3 | 2.7  | 1158 | 1 | 1 | 0 | 570.2935  |
| 166282 | 3 | 3 | 2.7  | 3419 | 1 | 1 | 1 | 937.4264  |
| 166282 | 3 | 3 | 2.7  | 3626 | 1 | 1 | 1 | 652.6625  |
| 35965  | 2 | 2 | 9.9  | 2441 | 1 | 1 | 1 | 744.8614  |
| 35965  | 2 | 2 | 9.9  | 3634 | 1 | 1 | 1 | 980.4872  |
| 92163  | 2 | 2 | 2.6  | 1207 | 1 | 1 | 1 | 575.806   |
| 92163  | 2 | 2 | 2.6  | 1849 | 1 | 1 | 1 | 658.8658  |
| 25092  | 2 | 2 | 13.1 | 2614 | 1 | 1 | 1 | 781.3648  |
| 25092  | 2 | 2 | 13.1 | 2976 | 1 | 1 | 1 | 852.9484  |
| 49361  | 2 | 2 | 6.6  | 1270 | 1 | 1 | 1 | 582.3174  |
| 49361  | 2 | 2 | 6.6  | 3527 | 1 | 1 | 1 | 954.0045  |
| 52150  | 5 | 4 | 11.1 | 227  | 1 | 1 | 1 | 422.7682  |
| 52150  | 5 | 4 | 11.1 | 986  | 1 | 1 | 1 | 544.7921  |
| 52150  | 5 | 4 | 11.1 | 1586 | 1 | 1 | 1 | 621.8216  |
| 52150  | 5 | 4 | 11.1 | 5051 | 1 | 1 | 1 | 886.1279  |
| 86221  | 2 | 2 | 4.1  | 777  | 1 | 1 | 1 | 516.8135  |
| 86221  | 2 | 2 | 4.1  | 4697 | 1 | 1 | 1 | 1184.1989 |
| 54004  | 3 | 3 | 6    | 747  | 1 | 1 | 1 | 513.2927  |

|        |   |   |      |      |   |   |   |           |
|--------|---|---|------|------|---|---|---|-----------|
| 54004  | 3 | 3 | 6    | 1040 | 1 | 1 | 1 | 552.8116  |
| 54004  | 3 | 3 | 6    | 1215 | 1 | 1 | 1 | 576.8032  |
| 188232 | 2 | 2 | 1.9  | 1490 | 1 | 1 | 1 | 609.801   |
| 188232 | 2 | 2 | 1.9  | 3977 | 1 | 1 | 1 | 1060.5647 |
| 102646 | 2 | 2 | 2.3  | 766  | 1 | 1 | 1 | 515.3065  |
| 102646 | 2 | 2 | 2.3  | 1481 | 1 | 1 | 1 | 608.3327  |
| 276563 | 5 | 5 | 3.1  | 865  | 1 | 1 | 1 | 529.7956  |
| 276563 | 5 | 5 | 3.1  | 1101 | 1 | 1 | 1 | 561.319   |
| 276563 | 5 | 5 | 3.1  | 3224 | 1 | 1 | 1 | 899.4274  |
| 276563 | 5 | 5 | 3.1  | 4005 | 1 | 1 | 1 | 714.0598  |
| 276563 | 5 | 5 | 3.1  | 4109 | 1 | 1 | 1 | 728.6894  |
| 29708  | 3 | 3 | 16.1 | 823  | 1 | 1 | 0 | 523.242   |
| 29708  | 3 | 3 | 16.1 | 1187 | 1 | 1 | 1 | 573.3023  |
| 29708  | 3 | 3 | 16.1 | 5473 | 1 | 1 | 1 | 1442.2214 |
| 146592 | 3 | 3 | 3.7  | 1882 | 1 | 0 | 0 | 663.3387  |
| 146592 | 3 | 3 | 3.7  | 3208 | 1 | 0 | 0 | 897.5034  |
| 146592 | 3 | 3 | 3.7  | 4262 | 1 | 1 | 1 | 744.423   |
| 141519 | 2 | 2 | 2.2  | 1588 | 1 | 1 | 1 | 621.8868  |
| 141519 | 2 | 2 | 2.2  | 3015 | 1 | 1 | 1 | 859.4423  |
| 81995  | 3 | 3 | 5.1  | 1444 | 1 | 1 | 1 | 603.7933  |
| 81995  | 3 | 3 | 5.1  | 2339 | 1 | 1 | 1 | 484.6362  |
| 81995  | 3 | 3 | 5.1  | 2515 | 1 | 1 | 1 | 762.3418  |
| 32499  | 2 | 2 | 8.7  | 457  | 1 | 1 | 1 | 470.795   |
| 32499  | 2 | 2 | 8.7  | 3901 | 1 | 1 | 1 | 694.6497  |
| 124495 | 4 | 4 | 3.9  | 695  | 1 | 1 | 1 | 505.7745  |
| 124495 | 4 | 4 | 3.9  | 708  | 1 | 1 | 1 | 338.5585  |
| 124495 | 4 | 4 | 3.9  | 1781 | 1 | 1 | 1 | 648.8849  |
| 124495 | 4 | 4 | 3.9  | 3053 | 1 | 1 | 1 | 577.9958  |
| 67832  | 2 | 2 | 4    | 1886 | 1 | 1 | 1 | 663.8568  |
| 67832  | 2 | 2 | 4    | 2152 | 1 | 1 | 1 | 698.3883  |
| 64176  | 3 | 3 | 5.3  | 2647 | 1 | 1 | 1 | 787.9817  |
| 64176  | 3 | 3 | 5.3  | 2839 | 1 | 1 | 1 | 827.5003  |
| 64176  | 3 | 3 | 5.3  | 3387 | 1 | 1 | 1 | 620.7045  |
| 34706  | 3 | 2 | 9.1  | 922  | 1 | 1 | 1 | 537.3188  |
| 34706  | 3 | 2 | 9.1  | 3677 | 1 | 1 | 1 | 658.3824  |
| 30950  | 2 | 2 | 9.2  | 2127 | 1 | 1 | 1 | 695.343   |
| 30950  | 2 | 2 | 9.2  | 2840 | 1 | 1 | 1 | 828.4285  |
| 107161 | 2 | 2 | 3.3  | 2711 | 1 | 1 | 1 | 799.9416  |
| 107161 | 2 | 2 | 3.3  | 3988 | 1 | 1 | 1 | 709.6885  |
| 33703  | 2 | 2 | 14.8 | 2211 | 1 | 1 | 1 | 706.4241  |
| 33703  | 2 | 2 | 14.8 | 6233 | 1 | 1 | 1 | 1184.3096 |
| 105370 | 2 | 2 | 2.5  | 1289 | 1 | 1 | 1 | 584.3089  |
| 105370 | 2 | 2 | 2.5  | 2205 | 1 | 1 | 1 | 706.3199  |
| 60657  | 2 | 2 | 3.5  | 404  | 1 | 1 | 1 | 459.2295  |
| 60657  | 2 | 2 | 3.5  | 1647 | 1 | 1 | 1 | 630.3332  |
| 86361  | 3 | 3 | 4.3  | 186  | 1 | 1 | 1 | 412.2267  |
| 86361  | 3 | 3 | 4.3  | 1223 | 1 | 1 | 1 | 577.8483  |
| 86361  | 3 | 3 | 4.3  | 2834 | 1 | 1 | 1 | 826.0056  |
| 36651  | 2 | 2 | 7.6  | 1651 | 1 | 1 | 1 | 630.7778  |
| 36651  | 2 | 2 | 7.6  | 2823 | 1 | 1 | 1 | 550.2747  |
| 147050 | 2 | 2 | 1.9  | 3030 | 1 | 1 | 1 | 861.4872  |
| 86196  | 3 | 3 | 4.3  | 76   | 1 | 1 | 1 | 379.2319  |
| 86196  | 3 | 3 | 4.3  | 1523 | 1 | 1 | 1 | 613.823   |
| 86196  | 3 | 3 | 4.3  | 2492 | 1 | 1 | 1 | 504.6184  |
| 53639  | 2 | 2 | 7.4  | 1010 | 1 | 1 | 1 | 548.3016  |
| 53639  | 2 | 2 | 7.4  | 5480 | 1 | 1 | 1 | 963.1286  |
| 111275 | 2 | 2 | 2.1  | 764  | 1 | 1 | 1 | 515.2875  |
| 111275 | 2 | 2 | 2.1  | 1974 | 1 | 1 | 1 | 674.8478  |

|           |              |              |            |           |          |            |              |            |
|-----------|--------------|--------------|------------|-----------|----------|------------|--------------|------------|
| 60872     | 3            | 3            | 5.9        | 1039      | 1        | 1          | 1            | 552.777    |
| 60872     | 3            | 3            | 5.9        | 1614      | 1        | 1          | 1            | 624.8248   |
| 60872     | 3            | 3            | 5.9        | 1960      | 1        | 1          | 1            | 672.8565   |
| 22787     | 2            | 2            | 12.6       | 2318      | 1        | 1          | 1            | 723.3281   |
| 22787     | 2            | 2            | 12.6       | 2664      | 1        | 1          | 1            | 790.8846   |
| 15188     | 2            | 2            | 20         | 486       | 1        | 1          | 1            | 475.2895   |
| 15188     | 2            | 2            | 20         | 3751      | 1        | 1          | 1            | 1003.4886  |
| 93010     | 2            | 2            | 4.3        | 931       | 1        | 1          | 1            | 538.7877   |
| 93010     | 2            | 2            | 4.3        | 5435      | 1        | 1          | 1            | 954.1726   |
| 32983     | 2            | 2            | 6.2        | 487       | 1        | 1          | 1            | 475.7476   |
| 32983     | 2            | 2            | 6.2        | 861       | 1        | 1          | 1            | 529.3219   |
| 59093     | 3            | 3            | 7.5        | 1567      | 1        | 0          | 0            | 618.8135   |
| 59093     | 3            | 3            | 7.5        | 2045      | 1        | 0          | 0            | 685.3194   |
| 59093     | 3            | 3            | 7.5        | 3544      | 1        | 1          | 1            | 638.7228   |
| 14066     | 2            | 2            | 18.5       | 1252      | 1        | 1          | 1            | 580.817    |
| 14066     | 2            | 2            | 18.5       | 1281      | 1        | 1          | 0            | 583.8069   |
| 59922     | 2            | 2            | 5.4        | 2045      | 1        | 0          | 0            | 685.3194   |
| 59922     | 2            | 2            | 5.4        | 3628      | 1        | 1          | 1            | 652.7263   |
| 23079     | 2            | 2            | 17.2       | 836       | 1        | 1          | 1            | 524.2957   |
| 23079     | 2            | 2            | 17.2       | 5560      | 1        | 1          | 1            | 981.5093   |
| 14095     | 2            | 2            | 18.5       | 1191      | 1        | 1          | 1            | 573.8093   |
| 14095     | 2            | 2            | 18.5       | 1281      | 1        | 0          | 0            | 583.8069   |
| 92840     | 2            | 2            | 3.8        | 1946      | 1        | 1          | 1            | 671.3591   |
| 92840     | 2            | 2            | 3.8        | 3536      | 1        | 1          | 1            | 955.0232   |
| 24852     | 2            | 2            | 13         | 1629      | 1        | 1          | 1            | 627.3331   |
| 24852     | 2            | 2            | 13         | 3275      | 1        | 1          | 1            | 907.9928   |
| 29193     | 2            | 2            | 7.7        | 321       | 1        | 1          | 1            | 441.2949   |
| 29193     | 2            | 2            | 7.7        | 1798      | 1        | 1          | 1            | 651.8146   |
| 97570     | 3            | 3            | 5          | 667       | 1        | 1          | 1            | 502.7731   |
| 97570     | 3            | 3            | 5          | 4860      | 1        | 1          | 1            | 830.0875   |
| 40742     | 2            | 2            | 5.6        | 917       | 1        | 1          | 1            | 537.2488   |
| 40742     | 2            | 2            | 5.6        | 1487      | 1        | 1          | 1            | 609.3478   |
| 17142     | 3            | 3            | 21.2       | 195       | 1        | 1          | 1            | 415.2606   |
| 17142     | 3            | 3            | 21.2       | 2092      | 1        | 1          | 1            | 461.2888   |
| 17142     | 3            | 3            | 21.2       | 2133      | 1        | 1          | 1            | 696.8185   |
| 39776     | 2            | 2            | 6.3        | 1459      | 1        | 1          | 1            | 605.8273   |
| 39776     | 2            | 2            | 6.3        | 1578      | 1        | 1          | 1            | 620.8374   |
| 29898     | 2            | 2            | 7.7        | 470       | 1        | 1          | 1            | 472.7741   |
| 29898     | 2            | 2            | 7.7        | 2384      | 1        | 1          | 1            | 490.2938   |
| 28013     | 2            | 2            | 11.6       | 716       | 1        | 1          | 1            | 508.7697   |
| 28013     | 2            | 2            | 11.6       | 3742      | 1        | 1          | 1            | 668.3222   |
| 33803     | 2            | 2            | 6.6        | 1136      | 1        | 1          | 1            | 567.2619   |
| 33803     | 2            | 2            | 6.6        | 1579      | 1        | 1          | 1            | 620.8484   |
| 77766     | 2            | 2            | 5.1        | 903       | 1        | 1          | 1            | 534.8062   |
| 77766     | 2            | 2            | 5.1        | 4953      | 1        | 1          | 1            | 857.4619   |
| 86850     | 2            | 2            | 2.9        | 1298      | 1        | 1          | 1            | 585.7857   |
| 86850     | 2            | 2            | 2.9        | 1627      | 1        | 1          | 1            | 626.3196   |
| 15496     | 2            | 2            | 17.2       | 533       | 1        | 1          | 1            | 482.7275   |
| 15496     | 2            | 2            | 17.2       | 2951      | 1        | 1          | 1            | 566.0049   |
| 57702     | 2            | 2            | 9.3        | 2349      | 1        | 1          | 1            | 485.5835   |
| 57702     | 2            | 2            | 9.3        | 6318      | 1        | 1          | 1            | 1319.6928  |
| prot_mass | prot_matches | prot_sequenc | prot_cover | pep_query | pep_rank | pep_isbold | pep_isunique | pep_exp_mz |
| 50361     | 31           | 18           | 67.1       | 576       | 1        | 1          | 1            | 488.7421   |
| 50361     | 31           | 18           | 67.1       | 753       | 1        | 1          | 1            | 514.2822   |
| 50361     | 31           | 18           | 67.1       | 1145      | 1        | 1          | 0            | 570.3503   |
| 50361     | 31           | 18           | 67.1       | 1171      | 1        | 1          | 0            | 573.7982   |
| 50361     | 31           | 18           | 67.1       | 1459      | 1        | 1          | 0            | 608.2946   |
| 50361     | 31           | 18           | 67.1       | 1767      | 1        | 1          | 1            | 650.3141   |

|       |    |    |      |      |   |   |   |           |
|-------|----|----|------|------|---|---|---|-----------|
| 50361 | 31 | 18 | 67.1 | 2187 | 1 | 1 | 0 | 701.8318  |
| 50361 | 31 | 18 | 67.1 | 2747 | 1 | 1 | 0 | 811.9294  |
| 50361 | 31 | 18 | 67.1 | 2794 | 1 | 1 | 0 | 824.4074  |
| 50361 | 31 | 18 | 67.1 | 2908 | 1 | 1 | 0 | 848.9196  |
| 50361 | 31 | 18 | 67.1 | 3163 | 1 | 1 | 0 | 911.9646  |
| 50361 | 31 | 18 | 67.1 | 3400 | 1 | 1 | 0 | 976.4465  |
| 50361 | 31 | 18 | 67.1 | 3435 | 1 | 1 | 0 | 987.0013  |
| 50361 | 31 | 18 | 67.1 | 4269 | 1 | 1 | 1 | 1184.0677 |
| 50361 | 31 | 18 | 67.1 | 4615 | 1 | 1 | 1 | 922.1119  |
| 50361 | 31 | 18 | 67.1 | 4659 | 1 | 1 | 0 | 933.4512  |
| 50361 | 31 | 18 | 67.1 | 4913 | 1 | 1 | 1 | 1067.4949 |
| 50361 | 31 | 18 | 67.1 | 4956 | 1 | 1 | 1 | 1104.1748 |
| 51385 | 27 | 15 | 46   | 858  | 1 | 1 | 0 | 530.2678  |
| 51385 | 27 | 15 | 46   | 1145 | 1 | 0 | 0 | 570.3503  |
| 51385 | 27 | 15 | 46   | 1171 | 1 | 0 | 0 | 573.7982  |
| 51385 | 27 | 15 | 46   | 1459 | 1 | 0 | 0 | 608.2946  |
| 51385 | 27 | 15 | 46   | 1757 | 1 | 1 | 1 | 648.8068  |
| 51385 | 27 | 15 | 46   | 2114 | 1 | 1 | 0 | 692.8536  |
| 51385 | 27 | 15 | 46   | 2350 | 1 | 1 | 1 | 723.3273  |
| 51385 | 27 | 15 | 46   | 2354 | 1 | 1 | 0 | 723.8474  |
| 51385 | 27 | 15 | 46   | 2747 | 1 | 0 | 0 | 811.9294  |
| 51385 | 27 | 15 | 46   | 2794 | 1 | 0 | 0 | 824.4074  |
| 51385 | 27 | 15 | 46   | 2908 | 1 | 0 | 0 | 848.9196  |
| 51385 | 27 | 15 | 46   | 3163 | 1 | 0 | 0 | 911.9646  |
| 51385 | 27 | 15 | 46   | 3400 | 1 | 0 | 0 | 976.4465  |
| 51385 | 27 | 15 | 46   | 3435 | 1 | 0 | 0 | 987.0013  |
| 51385 | 27 | 15 | 46   | 4666 | 1 | 1 | 1 | 934.7709  |
| 71559 | 27 | 19 | 40.5 | 1461 | 1 | 1 | 0 | 608.3295  |
| 71559 | 27 | 19 | 40.5 | 1496 | 1 | 1 | 1 | 613.7988  |
| 71559 | 27 | 19 | 40.5 | 1507 | 1 | 1 | 0 | 614.8178  |
| 71559 | 27 | 19 | 40.5 | 1693 | 1 | 1 | 0 | 639.8182  |
| 71559 | 27 | 19 | 40.5 | 1754 | 1 | 1 | 1 | 648.3354  |
| 71559 | 27 | 19 | 40.5 | 1815 | 1 | 1 | 1 | 654.8559  |
| 71559 | 27 | 19 | 40.5 | 1999 | 1 | 1 | 0 | 679.811   |
| 71559 | 27 | 19 | 40.5 | 2122 | 1 | 1 | 0 | 693.8677  |
| 71559 | 27 | 19 | 40.5 | 2208 | 1 | 1 | 1 | 704.3851  |
| 71559 | 27 | 19 | 40.5 | 2297 | 1 | 1 | 1 | 716.3755  |
| 71559 | 27 | 19 | 40.5 | 2425 | 1 | 1 | 0 | 737.3458  |
| 71559 | 27 | 19 | 40.5 | 2556 | 1 | 1 | 1 | 508.2719  |
| 71559 | 27 | 19 | 40.5 | 2689 | 1 | 1 | 1 | 798.9132  |
| 71559 | 27 | 19 | 40.5 | 2823 | 1 | 1 | 1 | 831.4196  |
| 71559 | 27 | 19 | 40.5 | 2856 | 1 | 1 | 0 | 838.3683  |
| 71559 | 27 | 19 | 40.5 | 2874 | 1 | 1 | 0 | 840.9208  |
| 71559 | 27 | 19 | 40.5 | 4450 | 1 | 1 | 0 | 1287.6384 |
| 71559 | 27 | 19 | 40.5 | 4455 | 1 | 1 | 0 | 863.4107  |
| 71559 | 27 | 19 | 40.5 | 4492 | 1 | 1 | 0 | 1329.6381 |
| 51258 | 27 | 14 | 43.7 | 858  | 1 | 0 | 0 | 530.2678  |
| 51258 | 27 | 14 | 43.7 | 1145 | 1 | 0 | 0 | 570.3503  |
| 51258 | 27 | 14 | 43.7 | 1171 | 1 | 0 | 0 | 573.7982  |
| 51258 | 27 | 14 | 43.7 | 1459 | 1 | 0 | 0 | 608.2946  |
| 51258 | 27 | 14 | 43.7 | 2114 | 1 | 0 | 0 | 692.8536  |
| 51258 | 27 | 14 | 43.7 | 2296 | 1 | 1 | 0 | 716.3189  |
| 51258 | 27 | 14 | 43.7 | 2354 | 1 | 0 | 0 | 723.8474  |
| 51258 | 27 | 14 | 43.7 | 2747 | 1 | 0 | 0 | 811.9294  |
| 51258 | 27 | 14 | 43.7 | 2763 | 1 | 1 | 0 | 817.4001  |
| 51258 | 27 | 14 | 43.7 | 2908 | 1 | 0 | 0 | 848.9196  |
| 51258 | 27 | 14 | 43.7 | 3163 | 1 | 0 | 0 | 911.9646  |
| 51258 | 27 | 14 | 43.7 | 3400 | 1 | 0 | 0 | 976.4465  |

|       |    |    |      |      |   |   |   |           |
|-------|----|----|------|------|---|---|---|-----------|
| 51258 | 27 | 14 | 43.7 | 3435 | 1 | 0 | 0 | 987.0013  |
| 51258 | 27 | 14 | 43.7 | 4684 | 1 | 1 | 0 | 938.7836  |
| 71712 | 29 | 18 | 38.6 | 1461 | 1 | 0 | 0 | 608.3295  |
| 71712 | 29 | 18 | 38.6 | 1507 | 1 | 0 | 0 | 614.8178  |
| 71712 | 29 | 18 | 38.6 | 1512 | 1 | 1 | 1 | 615.7687  |
| 71712 | 29 | 18 | 38.6 | 1693 | 1 | 0 | 0 | 639.8182  |
| 71712 | 29 | 18 | 38.6 | 1827 | 1 | 1 | 0 | 657.3131  |
| 71712 | 29 | 18 | 38.6 | 1999 | 1 | 0 | 0 | 679.811   |
| 71712 | 29 | 18 | 38.6 | 2122 | 1 | 0 | 0 | 693.8677  |
| 71712 | 29 | 18 | 38.6 | 2284 | 1 | 1 | 1 | 713.8855  |
| 71712 | 29 | 18 | 38.6 | 2322 | 1 | 1 | 0 | 718.8799  |
| 71712 | 29 | 18 | 38.6 | 2425 | 1 | 0 | 0 | 737.3458  |
| 71712 | 29 | 18 | 38.6 | 2604 | 1 | 1 | 0 | 514.2573  |
| 71712 | 29 | 18 | 38.6 | 2653 | 1 | 1 | 1 | 783.9077  |
| 71712 | 29 | 18 | 38.6 | 2828 | 1 | 1 | 0 | 832.4083  |
| 71712 | 29 | 18 | 38.6 | 2856 | 1 | 0 | 0 | 838.3683  |
| 71712 | 29 | 18 | 38.6 | 2874 | 1 | 0 | 0 | 840.9208  |
| 71712 | 29 | 18 | 38.6 | 4434 | 1 | 1 | 1 | 1280.6289 |
| 71712 | 29 | 18 | 38.6 | 4455 | 1 | 0 | 0 | 863.4107  |
| 71712 | 29 | 18 | 38.6 | 4492 | 1 | 0 | 0 | 1329.6381 |
| 51341 | 27 | 14 | 42.3 | 858  | 1 | 0 | 0 | 530.2678  |
| 51341 | 27 | 14 | 42.3 | 1145 | 1 | 0 | 0 | 570.3503  |
| 51341 | 27 | 14 | 42.3 | 1171 | 1 | 0 | 0 | 573.7982  |
| 51341 | 27 | 14 | 42.3 | 1459 | 1 | 0 | 0 | 608.2946  |
| 51341 | 27 | 14 | 42.3 | 1810 | 1 | 1 | 1 | 654.8246  |
| 51341 | 27 | 14 | 42.3 | 2187 | 1 | 0 | 0 | 701.8318  |
| 51341 | 27 | 14 | 42.3 | 2296 | 1 | 0 | 0 | 716.3189  |
| 51341 | 27 | 14 | 42.3 | 2354 | 1 | 0 | 0 | 723.8474  |
| 51341 | 27 | 14 | 42.3 | 2747 | 1 | 0 | 0 | 811.9294  |
| 51341 | 27 | 14 | 42.3 | 2763 | 1 | 0 | 0 | 817.4001  |
| 51341 | 27 | 14 | 42.3 | 2908 | 1 | 0 | 0 | 848.9196  |
| 51341 | 27 | 14 | 42.3 | 3400 | 1 | 0 | 0 | 976.4465  |
| 51341 | 27 | 14 | 42.3 | 3435 | 1 | 0 | 0 | 987.0013  |
| 51341 | 27 | 14 | 42.3 | 4684 | 1 | 0 | 0 | 938.7836  |
| 50194 | 19 | 14 | 49.6 | 608  | 1 | 1 | 0 | 494.2772  |
| 50194 | 19 | 14 | 49.6 | 1647 | 1 | 1 | 0 | 634.2579  |
| 50194 | 19 | 14 | 49.6 | 2162 | 1 | 1 | 0 | 698.882   |
| 50194 | 19 | 14 | 49.6 | 2430 | 1 | 1 | 1 | 737.435   |
| 50194 | 19 | 14 | 49.6 | 2698 | 1 | 1 | 0 | 799.8873  |
| 50194 | 19 | 14 | 49.6 | 2829 | 1 | 1 | 1 | 832.4408  |
| 50194 | 19 | 14 | 49.6 | 2918 | 1 | 1 | 0 | 851.4559  |
| 50194 | 19 | 14 | 49.6 | 3092 | 1 | 1 | 1 | 896.967   |
| 50194 | 19 | 14 | 49.6 | 3234 | 1 | 1 | 1 | 929.4441  |
| 50194 | 19 | 14 | 49.6 | 3289 | 1 | 1 | 0 | 943.477   |
| 50194 | 19 | 14 | 49.6 | 3444 | 1 | 1 | 1 | 989.4445  |
| 50194 | 19 | 14 | 49.6 | 4204 | 1 | 1 | 0 | 777.3443  |
| 50194 | 19 | 14 | 49.6 | 4309 | 1 | 1 | 1 | 1198.0996 |
| 50194 | 19 | 14 | 49.6 | 4471 | 1 | 1 | 1 | 875.7481  |
| 46960 | 19 | 14 | 41   | 440  | 1 | 1 | 1 | 468.2633  |
| 46960 | 19 | 14 | 41   | 509  | 1 | 1 | 0 | 479.7638  |
| 46960 | 19 | 14 | 41   | 578  | 1 | 1 | 1 | 488.7822  |
| 46960 | 19 | 14 | 41   | 716  | 1 | 1 | 0 | 509.2767  |
| 46960 | 19 | 14 | 41   | 1050 | 1 | 1 | 0 | 557.8451  |
| 46960 | 19 | 14 | 41   | 1156 | 1 | 1 | 0 | 571.7898  |
| 46960 | 19 | 14 | 41   | 1289 | 1 | 1 | 0 | 587.3275  |
| 46960 | 19 | 14 | 41   | 2184 | 1 | 1 | 0 | 701.3696  |
| 46960 | 19 | 14 | 41   | 2517 | 1 | 1 | 0 | 751.9428  |
| 46960 | 19 | 14 | 41   | 2657 | 1 | 1 | 0 | 786.3575  |

|       |    |    |      |      |   |   |   |           |
|-------|----|----|------|------|---|---|---|-----------|
| 46960 | 19 | 14 | 41   | 3174 | 1 | 1 | 0 | 914.4726  |
| 46960 | 19 | 14 | 41   | 3347 | 1 | 1 | 0 | 961.0044  |
| 46960 | 19 | 14 | 41   | 3548 | 1 | 1 | 0 | 676.6358  |
| 46960 | 19 | 14 | 41   | 3630 | 1 | 1 | 0 | 1030.048  |
| 47075 | 18 | 13 | 39.8 | 509  | 1 | 0 | 0 | 479.7638  |
| 47075 | 18 | 13 | 39.8 | 716  | 1 | 0 | 0 | 509.2767  |
| 47075 | 18 | 13 | 39.8 | 1050 | 1 | 0 | 0 | 557.8451  |
| 47075 | 18 | 13 | 39.8 | 1156 | 1 | 0 | 0 | 571.7898  |
| 47075 | 18 | 13 | 39.8 | 1289 | 1 | 0 | 0 | 587.3275  |
| 47075 | 18 | 13 | 39.8 | 2184 | 1 | 0 | 0 | 701.3696  |
| 47075 | 18 | 13 | 39.8 | 2358 | 1 | 1 | 1 | 724.3851  |
| 47075 | 18 | 13 | 39.8 | 2517 | 1 | 0 | 0 | 751.9428  |
| 47075 | 18 | 13 | 39.8 | 2657 | 1 | 0 | 0 | 786.3575  |
| 47075 | 18 | 13 | 39.8 | 3174 | 1 | 0 | 0 | 914.4726  |
| 47075 | 18 | 13 | 39.8 | 3347 | 1 | 0 | 0 | 961.0044  |
| 47075 | 18 | 13 | 39.8 | 3548 | 1 | 0 | 0 | 676.6358  |
| 47075 | 18 | 13 | 39.8 | 3630 | 1 | 0 | 0 | 1030.048  |
| 71741 | 16 | 11 | 25.3 | 1389 | 1 | 1 | 1 | 599.3509  |
| 71741 | 16 | 11 | 25.3 | 1507 | 1 | 0 | 0 | 614.8178  |
| 71741 | 16 | 11 | 25.3 | 1693 | 1 | 0 | 0 | 639.8182  |
| 71741 | 16 | 11 | 25.3 | 1999 | 1 | 0 | 0 | 679.811   |
| 71741 | 16 | 11 | 25.3 | 2322 | 1 | 0 | 0 | 718.8799  |
| 71741 | 16 | 11 | 25.3 | 2425 | 1 | 0 | 0 | 737.3458  |
| 71741 | 16 | 11 | 25.3 | 2828 | 1 | 0 | 0 | 832.4083  |
| 71741 | 16 | 11 | 25.3 | 2856 | 1 | 0 | 0 | 838.3683  |
| 71741 | 16 | 11 | 25.3 | 2874 | 1 | 0 | 0 | 840.9208  |
| 71741 | 16 | 11 | 25.3 | 4450 | 1 | 0 | 0 | 1287.6384 |
| 71741 | 16 | 11 | 25.3 | 4455 | 1 | 0 | 0 | 863.4107  |
| 71456 | 20 | 13 | 26.8 | 1507 | 1 | 0 | 0 | 614.8178  |
| 71456 | 20 | 13 | 26.8 | 1519 | 1 | 1 | 1 | 616.3271  |
| 71456 | 20 | 13 | 26.8 | 1616 | 1 | 1 | 1 | 630.8448  |
| 71456 | 20 | 13 | 26.8 | 1693 | 1 | 0 | 0 | 639.8182  |
| 71456 | 20 | 13 | 26.8 | 1827 | 1 | 0 | 0 | 657.3131  |
| 71456 | 20 | 13 | 26.8 | 1999 | 1 | 0 | 0 | 679.811   |
| 71456 | 20 | 13 | 26.8 | 2322 | 1 | 0 | 0 | 718.8799  |
| 71456 | 20 | 13 | 26.8 | 2425 | 1 | 0 | 0 | 737.3458  |
| 71456 | 20 | 13 | 26.8 | 2604 | 1 | 0 | 0 | 514.2573  |
| 71456 | 20 | 13 | 26.8 | 2856 | 1 | 0 | 0 | 838.3683  |
| 71456 | 20 | 13 | 26.8 | 2874 | 1 | 0 | 0 | 840.9208  |
| 71456 | 20 | 13 | 26.8 | 4450 | 1 | 0 | 0 | 1287.6384 |
| 71456 | 20 | 13 | 26.8 | 4455 | 1 | 0 | 0 | 863.4107  |
| 58863 | 19 | 15 | 37.8 | 435  | 1 | 1 | 1 | 467.237   |
| 58863 | 19 | 15 | 37.8 | 502  | 1 | 1 | 1 | 478.2896  |
| 58863 | 19 | 15 | 37.8 | 986  | 1 | 1 | 1 | 546.3027  |
| 58863 | 19 | 15 | 37.8 | 1236 | 1 | 1 | 1 | 581.2936  |
| 58863 | 19 | 15 | 37.8 | 1248 | 1 | 1 | 1 | 582.3242  |
| 58863 | 19 | 15 | 37.8 | 1855 | 1 | 1 | 1 | 659.3651  |
| 58863 | 19 | 15 | 37.8 | 2102 | 1 | 1 | 1 | 691.7967  |
| 58863 | 19 | 15 | 37.8 | 2152 | 1 | 1 | 1 | 697.377   |
| 58863 | 19 | 15 | 37.8 | 2723 | 1 | 1 | 1 | 805.443   |
| 58863 | 19 | 15 | 37.8 | 2805 | 1 | 1 | 1 | 826.4133  |
| 58863 | 19 | 15 | 37.8 | 2919 | 1 | 1 | 1 | 851.8722  |
| 58863 | 19 | 15 | 37.8 | 2955 | 1 | 1 | 1 | 860.9398  |
| 58863 | 19 | 15 | 37.8 | 3434 | 1 | 1 | 1 | 986.0309  |
| 58863 | 19 | 15 | 37.8 | 3873 | 1 | 1 | 1 | 1099.0582 |
| 58863 | 19 | 15 | 37.8 | 4490 | 1 | 1 | 1 | 886.4542  |
| 51237 | 16 | 10 | 26.9 | 858  | 1 | 0 | 0 | 530.2678  |
| 51237 | 16 | 10 | 26.9 | 1145 | 1 | 0 | 0 | 570.3503  |

|       |    |    |      |      |   |   |   |           |
|-------|----|----|------|------|---|---|---|-----------|
| 51237 | 16 | 10 | 26.9 | 1171 | 1 | 0 | 0 | 573.7982  |
| 51237 | 16 | 10 | 26.9 | 1459 | 1 | 0 | 0 | 608.2946  |
| 51237 | 16 | 10 | 26.9 | 2114 | 1 | 0 | 0 | 692.8536  |
| 51237 | 16 | 10 | 26.9 | 2296 | 1 | 0 | 0 | 716.3189  |
| 51237 | 16 | 10 | 26.9 | 2354 | 1 | 0 | 0 | 723.8474  |
| 51237 | 16 | 10 | 26.9 | 2747 | 1 | 0 | 0 | 811.9294  |
| 51237 | 16 | 10 | 26.9 | 2908 | 1 | 0 | 0 | 848.9196  |
| 51237 | 16 | 10 | 26.9 | 3404 | 1 | 1 | 0 | 653.0054  |
| 10285 | 9  | 5  | 54.6 | 404  | 1 | 1 | 1 | 460.7471  |
| 10285 | 9  | 5  | 54.6 | 460  | 1 | 1 | 1 | 471.2578  |
| 10285 | 9  | 5  | 54.6 | 2330 | 1 | 1 | 1 | 720.3467  |
| 10285 | 9  | 5  | 54.6 | 2508 | 1 | 1 | 1 | 751.3593  |
| 10285 | 9  | 5  | 54.6 | 3797 | 1 | 1 | 1 | 1078.515  |
| 50250 | 13 | 9  | 28.4 | 608  | 1 | 0 | 0 | 494.2772  |
| 50250 | 13 | 9  | 28.4 | 1647 | 1 | 0 | 0 | 634.2579  |
| 50250 | 13 | 9  | 28.4 | 2162 | 1 | 0 | 0 | 698.882   |
| 50250 | 13 | 9  | 28.4 | 2585 | 1 | 1 | 1 | 766.4562  |
| 50250 | 13 | 9  | 28.4 | 2678 | 1 | 1 | 1 | 792.8796  |
| 50250 | 13 | 9  | 28.4 | 2918 | 1 | 0 | 0 | 851.4559  |
| 50250 | 13 | 9  | 28.4 | 3258 | 1 | 1 | 0 | 934.9525  |
| 50250 | 13 | 9  | 28.4 | 3289 | 1 | 0 | 0 | 943.477   |
| 50250 | 13 | 9  | 28.4 | 4204 | 1 | 0 | 0 | 777.3443  |
| 37004 | 10 | 8  | 37.3 | 189  | 1 | 1 | 1 | 417.2349  |
| 37004 | 10 | 8  | 37.3 | 2497 | 1 | 1 | 1 | 749.9275  |
| 37004 | 10 | 8  | 37.3 | 2859 | 1 | 1 | 1 | 559.6627  |
| 37004 | 10 | 8  | 37.3 | 2982 | 1 | 1 | 1 | 867.9108  |
| 37004 | 10 | 8  | 37.3 | 3024 | 1 | 1 | 1 | 881.3968  |
| 37004 | 10 | 8  | 37.3 | 3563 | 1 | 1 | 1 | 1017.0392 |
| 37004 | 10 | 8  | 37.3 | 3825 | 1 | 1 | 1 | 1086.5078 |
| 37004 | 10 | 8  | 37.3 | 4011 | 1 | 1 | 1 | 1125.5397 |
| 51883 | 15 | 11 | 31.1 | 166  | 1 | 1 | 1 | 412.2554  |
| 51883 | 15 | 11 | 31.1 | 1000 | 1 | 1 | 1 | 548.3264  |
| 51883 | 15 | 11 | 31.1 | 1103 | 1 | 1 | 1 | 565.3265  |
| 51883 | 15 | 11 | 31.1 | 1221 | 1 | 1 | 1 | 579.3291  |
| 51883 | 15 | 11 | 31.1 | 2132 | 1 | 1 | 1 | 695.3392  |
| 51883 | 15 | 11 | 31.1 | 2315 | 1 | 1 | 1 | 718.338   |
| 51883 | 15 | 11 | 31.1 | 2880 | 1 | 1 | 1 | 841.4781  |
| 51883 | 15 | 11 | 31.1 | 3058 | 1 | 1 | 0 | 590.2667  |
| 51883 | 15 | 11 | 31.1 | 3140 | 1 | 1 | 1 | 906.9896  |
| 51883 | 15 | 11 | 31.1 | 3354 | 1 | 1 | 1 | 962.0271  |
| 51883 | 15 | 11 | 31.1 | 3723 | 1 | 1 | 1 | 1057.5284 |
| 49813 | 17 | 12 | 37.4 | 389  | 1 | 1 | 1 | 457.7869  |
| 49813 | 17 | 12 | 37.4 | 679  | 1 | 1 | 1 | 336.5228  |
| 49813 | 17 | 12 | 37.4 | 742  | 1 | 1 | 1 | 513.3083  |
| 49813 | 17 | 12 | 37.4 | 744  | 1 | 1 | 1 | 513.7478  |
| 49813 | 17 | 12 | 37.4 | 1067 | 1 | 1 | 1 | 560.803   |
| 49813 | 17 | 12 | 37.4 | 1442 | 1 | 1 | 1 | 605.7918  |
| 49813 | 17 | 12 | 37.4 | 1765 | 1 | 1 | 1 | 649.8767  |
| 49813 | 17 | 12 | 37.4 | 2372 | 1 | 1 | 1 | 726.3399  |
| 49813 | 17 | 12 | 37.4 | 2764 | 1 | 1 | 1 | 545.6386  |
| 49813 | 17 | 12 | 37.4 | 4160 | 1 | 1 | 1 | 771.3799  |
| 49813 | 17 | 12 | 37.4 | 4406 | 1 | 1 | 1 | 1253.6677 |
| 49813 | 17 | 12 | 37.4 | 4806 | 1 | 1 | 1 | 986.4788  |
| 40001 | 12 | 8  | 27.2 | 1215 | 1 | 1 | 1 | 578.806   |
| 40001 | 12 | 8  | 27.2 | 1374 | 1 | 1 | 0 | 597.3351  |
| 40001 | 12 | 8  | 27.2 | 1466 | 1 | 1 | 0 | 609.3064  |
| 40001 | 12 | 8  | 27.2 | 1698 | 1 | 1 | 1 | 640.8181  |
| 40001 | 12 | 8  | 27.2 | 2271 | 1 | 1 | 0 | 712.3353  |

|        |    |   |      |      |   |   |   |           |
|--------|----|---|------|------|---|---|---|-----------|
| 40001  | 12 | 8 | 27.2 | 2464 | 1 | 1 | 1 | 742.4141  |
| 40001  | 12 | 8 | 27.2 | 2712 | 1 | 1 | 1 | 801.9391  |
| 40001  | 12 | 8 | 27.2 | 3119 | 1 | 1 | 1 | 902.4705  |
| 41112  | 9  | 8 | 23.5 | 121  | 1 | 1 | 1 | 397.2261  |
| 41112  | 9  | 8 | 23.5 | 154  | 1 | 1 | 0 | 408.7505  |
| 41112  | 9  | 8 | 23.5 | 1479 | 1 | 1 | 0 | 611.8192  |
| 41112  | 9  | 8 | 23.5 | 2453 | 1 | 1 | 0 | 740.3932  |
| 41112  | 9  | 8 | 23.5 | 2533 | 1 | 1 | 1 | 758.3614  |
| 41112  | 9  | 8 | 23.5 | 2881 | 1 | 1 | 1 | 842.4222  |
| 41112  | 9  | 8 | 23.5 | 3144 | 1 | 1 | 1 | 907.5044  |
| 41112  | 9  | 8 | 23.5 | 3219 | 1 | 1 | 1 | 923.9314  |
| 73174  | 10 | 9 | 16.3 | 250  | 1 | 1 | 1 | 429.2639  |
| 73174  | 10 | 9 | 16.3 | 1104 | 1 | 1 | 1 | 565.7881  |
| 73174  | 10 | 9 | 16.3 | 1359 | 1 | 1 | 1 | 595.8418  |
| 73174  | 10 | 9 | 16.3 | 1529 | 1 | 1 | 1 | 618.2907  |
| 73174  | 10 | 9 | 16.3 | 2252 | 1 | 1 | 1 | 709.3669  |
| 73174  | 10 | 9 | 16.3 | 2253 | 1 | 1 | 0 | 709.3711  |
| 73174  | 10 | 9 | 16.3 | 2621 | 1 | 1 | 0 | 775.9017  |
| 73174  | 10 | 9 | 16.3 | 2730 | 1 | 1 | 1 | 538.6295  |
| 73174  | 10 | 9 | 16.3 | 3161 | 1 | 1 | 1 | 911.4565  |
| 73315  | 10 | 9 | 16.4 | 363  | 1 | 1 | 1 | 453.2326  |
| 73315  | 10 | 9 | 16.4 | 1572 | 1 | 1 | 1 | 624.8454  |
| 73315  | 10 | 9 | 16.4 | 1574 | 1 | 1 | 1 | 625.2859  |
| 73315  | 10 | 9 | 16.4 | 1750 | 1 | 1 | 1 | 647.7941  |
| 73315  | 10 | 9 | 16.4 | 1887 | 1 | 1 | 1 | 664.3225  |
| 73315  | 10 | 9 | 16.4 | 2018 | 1 | 1 | 1 | 681.3738  |
| 73315  | 10 | 9 | 16.4 | 2253 | 1 | 0 | 0 | 709.3711  |
| 73315  | 10 | 9 | 16.4 | 2621 | 1 | 0 | 0 | 775.9017  |
| 73315  | 10 | 9 | 16.4 | 3141 | 1 | 1 | 1 | 907.4805  |
| 40949  | 8  | 7 | 21.9 | 154  | 1 | 0 | 0 | 408.7505  |
| 40949  | 8  | 7 | 21.9 | 1479 | 1 | 0 | 0 | 611.8192  |
| 40949  | 8  | 7 | 21.9 | 2453 | 1 | 0 | 0 | 740.3932  |
| 40949  | 8  | 7 | 21.9 | 2533 | 1 | 0 | 1 | 758.3614  |
| 40949  | 8  | 7 | 21.9 | 2968 | 1 | 1 | 1 | 863.8913  |
| 40949  | 8  | 7 | 21.9 | 3049 | 1 | 1 | 1 | 883.4599  |
| 40949  | 8  | 7 | 21.9 | 3111 | 1 | 1 | 1 | 900.972   |
| 136636 | 8  | 7 | 7.5  | 226  | 1 | 1 | 1 | 424.7528  |
| 136636 | 8  | 7 | 7.5  | 1657 | 1 | 1 | 1 | 635.3616  |
| 136636 | 8  | 7 | 7.5  | 1678 | 1 | 1 | 1 | 638.8283  |
| 136636 | 8  | 7 | 7.5  | 2412 | 1 | 1 | 1 | 734.8952  |
| 136636 | 8  | 7 | 7.5  | 2463 | 1 | 1 | 1 | 742.3843  |
| 136636 | 8  | 7 | 7.5  | 2655 | 1 | 1 | 1 | 784.9191  |
| 136636 | 8  | 7 | 7.5  | 3984 | 1 | 1 | 1 | 1121.1203 |
| 52347  | 4  | 4 | 14.3 | 1203 | 1 | 1 | 1 | 576.8604  |
| 52347  | 4  | 4 | 14.3 | 2910 | 1 | 1 | 1 | 849.3833  |
| 52347  | 4  | 4 | 14.3 | 3780 | 1 | 1 | 1 | 1075.5691 |
| 52347  | 4  | 4 | 14.3 | 4236 | 1 | 1 | 1 | 1174.0976 |
| 166282 | 7  | 7 | 6.8  | 1143 | 1 | 1 | 0 | 570.2942  |
| 166282 | 7  | 7 | 6.8  | 1836 | 1 | 1 | 1 | 658.3521  |
| 166282 | 7  | 7 | 6.8  | 2482 | 1 | 1 | 1 | 746.8749  |
| 166282 | 7  | 7 | 6.8  | 3264 | 1 | 1 | 1 | 937.426   |
| 166282 | 7  | 7 | 6.8  | 3403 | 1 | 1 | 1 | 652.662   |
| 166282 | 7  | 7 | 6.8  | 3461 | 1 | 1 | 1 | 993.9752  |
| 166282 | 7  | 7 | 6.8  | 3818 | 1 | 1 | 1 | 723.6675  |
| 41937  | 8  | 8 | 32.6 | 575  | 1 | 1 | 0 | 488.7278  |
| 41937  | 8  | 8 | 32.6 | 1164 | 1 | 1 | 0 | 572.7831  |
| 41937  | 8  | 8 | 32.6 | 1390 | 1 | 1 | 0 | 599.8563  |
| 41937  | 8  | 8 | 32.6 | 2435 | 1 | 1 | 1 | 738.3411  |

|        |   |   |      |      |   |   |   |           |
|--------|---|---|------|------|---|---|---|-----------|
| 41937  | 8 | 8 | 32.6 | 2535 | 1 | 1 | 0 | 758.378   |
| 41937  | 8 | 8 | 32.6 | 3233 | 1 | 1 | 1 | 928.4698  |
| 41937  | 8 | 8 | 32.6 | 3841 | 1 | 1 | 1 | 1092.0424 |
| 41937  | 8 | 8 | 32.6 | 4898 | 1 | 1 | 0 | 1051.2183 |
| 29784  | 5 | 3 | 19   | 1551 | 1 | 1 | 1 | 621.8286  |
| 29784  | 5 | 3 | 19   | 3371 | 1 | 1 | 1 | 968.0203  |
| 29784  | 5 | 3 | 19   | 4352 | 1 | 1 | 1 | 1216.1221 |
| 49607  | 6 | 5 | 17.4 | 1453 | 1 | 1 | 1 | 607.343   |
| 49607  | 6 | 5 | 17.4 | 2685 | 1 | 1 | 1 | 794.8992  |
| 49607  | 6 | 5 | 17.4 | 3058 | 1 | 0 | 0 | 590.2667  |
| 49607  | 6 | 5 | 17.4 | 3748 | 1 | 1 | 1 | 1065.0406 |
| 49607  | 6 | 5 | 17.4 | 3888 | 1 | 1 | 1 | 735.3964  |
| 36185  | 8 | 6 | 25.8 | 1715 | 1 | 1 | 1 | 642.3817  |
| 36185  | 8 | 6 | 25.8 | 1788 | 1 | 1 | 1 | 652.3788  |
| 36185  | 8 | 6 | 25.8 | 1883 | 1 | 1 | 1 | 663.8107  |
| 36185  | 8 | 6 | 25.8 | 2531 | 1 | 1 | 1 | 505.284   |
| 36185  | 8 | 6 | 25.8 | 3063 | 1 | 1 | 1 | 885.4291  |
| 36185  | 8 | 6 | 25.8 | 4179 | 1 | 1 | 1 | 774.4086  |
| 23090  | 6 | 4 | 23.2 | 640  | 1 | 1 | 0 | 499.7851  |
| 23090  | 6 | 4 | 23.2 | 1373 | 1 | 1 | 0 | 398.544   |
| 23090  | 6 | 4 | 23.2 | 2191 | 1 | 1 | 1 | 702.4025  |
| 23090  | 6 | 4 | 23.2 | 2756 | 1 | 1 | 0 | 816.4183  |
| 39964  | 6 | 6 | 22.9 | 1374 | 1 | 0 | 0 | 597.3351  |
| 39964  | 6 | 6 | 22.9 | 1466 | 1 | 0 | 0 | 609.3064  |
| 39964  | 6 | 6 | 22.9 | 2271 | 1 | 0 | 0 | 712.3353  |
| 39964  | 6 | 6 | 22.9 | 2416 | 1 | 1 | 1 | 735.4058  |
| 39964  | 6 | 6 | 22.9 | 2913 | 1 | 1 | 1 | 567.6447  |
| 39964  | 6 | 6 | 22.9 | 4039 | 1 | 1 | 1 | 1131.0426 |
| 94743  | 5 | 4 | 7.4  | 2375 | 1 | 1 | 1 | 726.8484  |
| 94743  | 5 | 4 | 7.4  | 2512 | 1 | 1 | 1 | 751.8427  |
| 94743  | 5 | 4 | 7.4  | 3108 | 1 | 1 | 1 | 900.4694  |
| 94743  | 5 | 4 | 7.4  | 4313 | 1 | 1 | 1 | 800.3922  |
| 49487  | 5 | 4 | 15.3 | 1732 | 1 | 1 | 1 | 644.3576  |
| 49487  | 5 | 4 | 15.3 | 3011 | 1 | 1 | 1 | 876.4355  |
| 49487  | 5 | 4 | 15.3 | 3770 | 1 | 1 | 1 | 1073.0566 |
| 49487  | 5 | 4 | 15.3 | 3887 | 1 | 1 | 1 | 1102.5702 |
| 105902 | 9 | 8 | 11.3 | 563  | 1 | 1 | 1 | 486.7769  |
| 105902 | 9 | 8 | 11.3 | 757  | 1 | 1 | 0 | 515.2881  |
| 105902 | 9 | 8 | 11.3 | 827  | 1 | 1 | 1 | 525.7699  |
| 105902 | 9 | 8 | 11.3 | 1227 | 1 | 1 | 0 | 580.3002  |
| 105902 | 9 | 8 | 11.3 | 2167 | 1 | 1 | 0 | 699.3726  |
| 105902 | 9 | 8 | 11.3 | 2445 | 1 | 1 | 0 | 738.8946  |
| 105902 | 9 | 8 | 11.3 | 3306 | 1 | 1 | 1 | 946.5283  |
| 105902 | 9 | 8 | 11.3 | 4407 | 1 | 1 | 0 | 836.7989  |
| 53612  | 7 | 6 | 19.6 | 791  | 1 | 1 | 1 | 520.3109  |
| 53612  | 7 | 6 | 19.6 | 1571 | 1 | 1 | 1 | 624.8201  |
| 53612  | 7 | 6 | 19.6 | 1872 | 1 | 1 | 1 | 662.3356  |
| 53612  | 7 | 6 | 19.6 | 2321 | 1 | 1 | 1 | 718.8236  |
| 53612  | 7 | 6 | 19.6 | 4489 | 1 | 1 | 1 | 884.8048  |
| 53612  | 7 | 6 | 19.6 | 4741 | 1 | 1 | 1 | 964.8345  |
| 59440  | 5 | 5 | 15.7 | 1749 | 1 | 1 | 1 | 647.3427  |
| 59440  | 5 | 5 | 15.7 | 2055 | 1 | 1 | 1 | 685.3194  |
| 59440  | 5 | 5 | 15.7 | 2847 | 1 | 1 | 1 | 835.418   |
| 59440  | 5 | 5 | 15.7 | 4374 | 1 | 1 | 1 | 1235.0927 |
| 59440  | 5 | 5 | 15.7 | 4393 | 1 | 1 | 1 | 831.7916  |
| 57763  | 5 | 4 | 13.1 | 1287 | 1 | 1 | 1 | 587.3     |
| 57763  | 5 | 4 | 13.1 | 2169 | 1 | 1 | 1 | 699.8432  |
| 57763  | 5 | 4 | 13.1 | 4077 | 1 | 1 | 1 | 1136.5866 |

|       |   |   |      |      |   |   |   |           |
|-------|---|---|------|------|---|---|---|-----------|
| 57763 | 5 | 4 | 13.1 | 4420 | 1 | 1 | 1 | 841.4651  |
| 32499 | 4 | 4 | 21.1 | 456  | 1 | 1 | 1 | 470.795   |
| 32499 | 4 | 4 | 21.1 | 3247 | 1 | 1 | 1 | 933.0282  |
| 32499 | 4 | 4 | 21.1 | 3668 | 1 | 1 | 1 | 694.6488  |
| 32499 | 4 | 4 | 21.1 | 3836 | 1 | 1 | 1 | 1089.0217 |
| 73869 | 5 | 5 | 10   | 1213 | 1 | 1 | 0 | 578.3274  |
| 73869 | 5 | 5 | 10   | 1759 | 1 | 1 | 0 | 648.8142  |
| 73869 | 5 | 5 | 10   | 2488 | 1 | 1 | 0 | 747.8647  |
| 73869 | 5 | 5 | 10   | 2648 | 1 | 1 | 0 | 782.9169  |
| 73869 | 5 | 5 | 10   | 3619 | 1 | 1 | 1 | 1027.0088 |
| 41563 | 7 | 7 | 18.6 | 91   | 1 | 1 | 0 | 386.2272  |
| 41563 | 7 | 7 | 18.6 | 396  | 1 | 1 | 0 | 459.2944  |
| 41563 | 7 | 7 | 18.6 | 884  | 1 | 1 | 1 | 533.7511  |
| 41563 | 7 | 7 | 18.6 | 2012 | 1 | 1 | 1 | 680.8597  |
| 41563 | 7 | 7 | 18.6 | 2211 | 1 | 1 | 1 | 470.2454  |
| 41563 | 7 | 7 | 18.6 | 2356 | 1 | 1 | 0 | 723.875   |
| 41563 | 7 | 7 | 18.6 | 3605 | 1 | 1 | 1 | 1024.512  |
| 42056 | 7 | 7 | 26.3 | 575  | 1 | 0 | 0 | 488.7278  |
| 42056 | 7 | 7 | 26.3 | 1110 | 1 | 1 | 1 | 566.7668  |
| 42056 | 7 | 7 | 26.3 | 1164 | 1 | 0 | 0 | 572.7831  |
| 42056 | 7 | 7 | 26.3 | 1390 | 1 | 0 | 0 | 599.8563  |
| 42056 | 7 | 7 | 26.3 | 2535 | 1 | 0 | 0 | 758.378   |
| 42056 | 7 | 7 | 26.3 | 3089 | 1 | 1 | 1 | 895.9489  |
| 42056 | 7 | 7 | 26.3 | 4898 | 1 | 0 | 0 | 1051.2183 |
| 41834 | 7 | 7 | 16.1 | 91   | 1 | 0 | 0 | 386.2272  |
| 41834 | 7 | 7 | 16.1 | 396  | 1 | 0 | 0 | 459.2944  |
| 41834 | 7 | 7 | 16.1 | 769  | 1 | 1 | 1 | 516.7592  |
| 41834 | 7 | 7 | 16.1 | 1505 | 1 | 1 | 1 | 614.8137  |
| 41834 | 7 | 7 | 16.1 | 2012 | 1 | 0 | 1 | 680.8597  |
| 41834 | 7 | 7 | 16.1 | 2188 | 1 | 1 | 1 | 468.2526  |
| 41834 | 7 | 7 | 16.1 | 2356 | 1 | 0 | 0 | 723.875   |
| 65547 | 6 | 6 | 12.2 | 1105 | 1 | 1 | 1 | 566.2387  |
| 65547 | 6 | 6 | 12.2 | 1226 | 1 | 1 | 1 | 580.2543  |
| 65547 | 6 | 6 | 12.2 | 1349 | 1 | 1 | 1 | 594.3551  |
| 65547 | 6 | 6 | 12.2 | 1621 | 1 | 1 | 1 | 631.3432  |
| 65547 | 6 | 6 | 12.2 | 2504 | 1 | 1 | 1 | 500.8996  |
| 65547 | 6 | 6 | 12.2 | 3147 | 1 | 1 | 1 | 908.4588  |
| 44356 | 4 | 4 | 16.6 | 9    | 1 | 1 | 1 | 355.7009  |
| 44356 | 4 | 4 | 16.6 | 1692 | 1 | 1 | 1 | 639.816   |
| 44356 | 4 | 4 | 16.6 | 3316 | 1 | 1 | 1 | 951.4755  |
| 44356 | 4 | 4 | 16.6 | 5022 | 1 | 1 | 1 | 1119.8656 |
| 73801 | 5 | 5 | 10   | 1213 | 1 | 0 | 0 | 578.3274  |
| 73801 | 5 | 5 | 10   | 1759 | 1 | 0 | 0 | 648.8142  |
| 73801 | 5 | 5 | 10   | 2488 | 1 | 0 | 0 | 747.8647  |
| 73801 | 5 | 5 | 10   | 2648 | 1 | 0 | 0 | 782.9169  |
| 73801 | 5 | 5 | 10   | 3526 | 1 | 1 | 1 | 1010.0175 |
| 29729 | 3 | 3 | 26.3 | 3114 | 1 | 1 | 1 | 901.3997  |
| 29729 | 3 | 3 | 26.3 | 4711 | 1 | 1 | 1 | 951.5054  |
| 29729 | 3 | 3 | 26.3 | 4805 | 1 | 1 | 1 | 986.1578  |
| 59765 | 4 | 4 | 9.2  | 574  | 1 | 1 | 1 | 488.2847  |
| 59765 | 4 | 4 | 9.2  | 2283 | 1 | 1 | 1 | 713.3907  |
| 59765 | 4 | 4 | 9.2  | 2388 | 1 | 1 | 1 | 729.4234  |
| 59765 | 4 | 4 | 9.2  | 2483 | 1 | 1 | 1 | 746.8911  |
| 61584 | 2 | 2 | 5.7  | 2528 | 1 | 1 | 0 | 754.8872  |
| 61584 | 2 | 2 | 5.7  | 3390 | 1 | 1 | 1 | 973.5328  |
| 43168 | 3 | 3 | 8.1  | 582  | 1 | 1 | 1 | 490.2401  |
| 43168 | 3 | 3 | 8.1  | 1432 | 1 | 1 | 1 | 603.8068  |
| 43168 | 3 | 3 | 8.1  | 2420 | 1 | 1 | 1 | 735.8698  |

|        |   |   |      |      |   |   |   |           |
|--------|---|---|------|------|---|---|---|-----------|
| 44960  | 5 | 5 | 20.6 | 1225 | 1 | 1 | 0 | 579.8288  |
| 44960  | 5 | 5 | 20.6 | 1667 | 1 | 1 | 1 | 637.3236  |
| 44960  | 5 | 5 | 20.6 | 1681 | 1 | 1 | 1 | 638.8488  |
| 44960  | 5 | 5 | 20.6 | 3375 | 1 | 1 | 1 | 968.9883  |
| 44960  | 5 | 5 | 20.6 | 4926 | 1 | 1 | 1 | 1082.1902 |
| 17591  | 2 | 2 | 21.1 | 1983 | 1 | 1 | 1 | 678.3342  |
| 17591  | 2 | 2 | 21.1 | 3676 | 1 | 1 | 1 | 1043.0364 |
| 187789 | 2 | 2 | 1.9  | 2891 | 1 | 1 | 1 | 844.4469  |
| 187789 | 2 | 2 | 1.9  | 3192 | 1 | 1 | 1 | 919.4569  |
| 77064  | 5 | 5 | 7.2  | 288  | 1 | 1 | 1 | 435.7739  |
| 77064  | 5 | 5 | 7.2  | 390  | 1 | 1 | 1 | 458.2476  |
| 77064  | 5 | 5 | 7.2  | 687  | 1 | 1 | 1 | 505.803   |
| 77064  | 5 | 5 | 7.2  | 2393 | 1 | 1 | 1 | 731.3885  |
| 77064  | 5 | 5 | 7.2  | 2668 | 1 | 1 | 1 | 790.4083  |
| 47236  | 4 | 4 | 14.4 | 1225 | 1 | 0 | 0 | 579.8288  |
| 47236  | 4 | 4 | 14.4 | 2790 | 1 | 1 | 0 | 822.9421  |
| 47236  | 4 | 4 | 14.4 | 3290 | 1 | 1 | 0 | 943.9547  |
| 47236  | 4 | 4 | 14.4 | 3429 | 1 | 1 | 1 | 984.4721  |
| 80376  | 4 | 4 | 7.4  | 1599 | 1 | 1 | 0 | 628.8512  |
| 80376  | 4 | 4 | 7.4  | 1742 | 1 | 1 | 0 | 646.321   |
| 80376  | 4 | 4 | 7.4  | 2571 | 1 | 1 | 1 | 764.4039  |
| 80376  | 4 | 4 | 7.4  | 2673 | 1 | 1 | 1 | 528.6017  |
| 27673  | 3 | 2 | 10   | 1735 | 1 | 1 | 1 | 644.8376  |
| 27673  | 3 | 2 | 10   | 2272 | 1 | 1 | 1 | 712.3376  |
| 148890 | 2 | 2 | 2.4  | 2565 | 1 | 1 | 1 | 763.4572  |
| 148890 | 2 | 2 | 2.4  | 3380 | 1 | 1 | 1 | 971.0334  |
| 40630  | 3 | 3 | 9.5  | 647  | 1 | 1 | 1 | 500.7921  |
| 40630  | 3 | 3 | 9.5  | 1719 | 1 | 1 | 1 | 643.3627  |
| 40630  | 3 | 3 | 9.5  | 2246 | 1 | 1 | 1 | 708.3852  |
| 22118  | 5 | 4 | 25.8 | 345  | 1 | 1 | 1 | 449.7531  |
| 22118  | 5 | 4 | 25.8 | 1278 | 1 | 1 | 1 | 585.8058  |
| 22118  | 5 | 4 | 25.8 | 2671 | 1 | 1 | 1 | 791.9308  |
| 22118  | 5 | 4 | 25.8 | 3091 | 1 | 1 | 1 | 598.3051  |
| 264216 | 4 | 4 | 2.3  | 2502 | 1 | 1 | 1 | 750.4215  |
| 264216 | 4 | 4 | 2.3  | 2639 | 1 | 1 | 1 | 779.9511  |
| 264216 | 4 | 4 | 2.3  | 2667 | 1 | 1 | 1 | 790.3558  |
| 264216 | 4 | 4 | 2.3  | 2940 | 1 | 1 | 1 | 857.9204  |
| 19009  | 2 | 2 | 14.6 | 1602 | 1 | 1 | 1 | 629.3738  |
| 19009  | 2 | 2 | 14.6 | 2115 | 1 | 1 | 1 | 692.8588  |
| 103283 | 3 | 3 | 4.3  | 727  | 1 | 1 | 1 | 510.2586  |
| 103283 | 3 | 3 | 4.3  | 2402 | 1 | 1 | 1 | 731.8879  |
| 103283 | 3 | 3 | 4.3  | 3190 | 1 | 1 | 1 | 918.9737  |
| 47389  | 4 | 4 | 12.9 | 1225 | 1 | 0 | 0 | 579.8288  |
| 47389  | 4 | 4 | 12.9 | 1879 | 1 | 1 | 1 | 663.3212  |
| 47389  | 4 | 4 | 12.9 | 2456 | 1 | 1 | 1 | 493.9588  |
| 47389  | 4 | 4 | 12.9 | 3351 | 1 | 1 | 1 | 961.9799  |
| 154652 | 2 | 2 | 2.4  | 2360 | 1 | 1 | 1 | 724.4127  |
| 154652 | 2 | 2 | 2.4  | 3301 | 1 | 1 | 1 | 945.9991  |
| 83408  | 2 | 2 | 3.5  | 1598 | 1 | 1 | 1 | 628.8297  |
| 83408  | 2 | 2 | 3.5  | 2837 | 1 | 1 | 1 | 833.4279  |
| 14066  | 2 | 2 | 18.5 | 1231 | 1 | 1 | 1 | 580.8172  |
| 14066  | 2 | 2 | 18.5 | 1258 | 1 | 1 | 0 | 583.8049  |
| 65730  | 2 | 2 | 5.7  | 2193 | 1 | 1 | 1 | 702.8332  |
| 65730  | 2 | 2 | 5.7  | 3930 | 1 | 1 | 1 | 1112.0938 |
| 30915  | 2 | 2 | 12.4 | 3216 | 1 | 1 | 1 | 923.5068  |
| 30915  | 2 | 2 | 12.4 | 3392 | 1 | 1 | 1 | 973.9813  |
| 47005  | 3 | 3 | 11.7 | 2619 | 1 | 1 | 1 | 774.9482  |
| 47005  | 3 | 3 | 11.7 | 3406 | 1 | 1 | 1 | 654.6636  |

|        |   |   |      |      |   |   |   |           |
|--------|---|---|------|------|---|---|---|-----------|
| 47005  | 3 | 3 | 11.7 | 3697 | 1 | 1 | 1 | 699.396   |
| 65220  | 2 | 2 | 6.9  | 2974 | 1 | 1 | 1 | 865.9236  |
| 65220  | 2 | 2 | 6.9  | 4485 | 1 | 1 | 1 | 881.7886  |
| 16304  | 2 | 2 | 16   | 837  | 1 | 1 | 1 | 527.7844  |
| 16304  | 2 | 2 | 16   | 2344 | 1 | 1 | 1 | 722.3691  |
| 20970  | 2 | 2 | 12.8 | 1320 | 1 | 1 | 1 | 591.3532  |
| 20970  | 2 | 2 | 12.8 | 2121 | 1 | 1 | 1 | 693.4032  |
| 98766  | 3 | 3 | 5.4  | 2192 | 1 | 1 | 1 | 702.4367  |
| 98766  | 3 | 3 | 5.4  | 2650 | 1 | 1 | 1 | 783.4576  |
| 98766  | 3 | 3 | 5.4  | 3721 | 1 | 1 | 1 | 1056.5283 |
| 64169  | 2 | 2 | 4    | 1398 | 1 | 1 | 1 | 600.3352  |
| 64169  | 2 | 2 | 4    | 1699 | 1 | 1 | 1 | 640.8873  |
| 194402 | 2 | 2 | 1.4  | 834  | 1 | 1 | 1 | 527.2763  |
| 194402 | 2 | 2 | 1.4  | 2319 | 1 | 1 | 1 | 718.3748  |
| 196643 | 2 | 2 | 1.9  | 1700 | 1 | 1 | 1 | 640.9005  |
| 196643 | 2 | 2 | 1.9  | 4217 | 1 | 1 | 1 | 1169.0843 |
| 30060  | 2 | 2 | 9.2  | 1451 | 1 | 1 | 1 | 607.2848  |
| 30060  | 2 | 2 | 9.2  | 2741 | 1 | 1 | 1 | 810.4484  |
| 28210  | 3 | 3 | 9.9  | 67   | 1 | 1 | 1 | 378.2602  |
| 28210  | 3 | 3 | 9.9  | 96   | 1 | 1 | 1 | 387.7655  |
| 28210  | 3 | 3 | 9.9  | 2526 | 1 | 1 | 1 | 753.8907  |
| 40331  | 2 | 2 | 6.9  | 1355 | 1 | 1 | 1 | 595.3239  |
| 40331  | 2 | 2 | 6.9  | 1977 | 1 | 1 | 1 | 676.8246  |
| 42230  | 2 | 2 | 8.9  | 1575 | 1 | 1 | 1 | 625.3127  |
| 42230  | 2 | 2 | 8.9  | 4366 | 1 | 1 | 1 | 815.4696  |
| 120769 | 3 | 3 | 4.2  | 1569 | 1 | 1 | 1 | 624.798   |
| 120769 | 3 | 3 | 4.2  | 2331 | 1 | 1 | 1 | 720.3583  |
| 120769 | 3 | 3 | 4.2  | 4390 | 1 | 1 | 1 | 830.4458  |
| 286993 | 2 | 2 | 1.1  | 2020 | 1 | 1 | 1 | 681.8761  |
| 286993 | 2 | 2 | 1.1  | 3610 | 1 | 1 | 1 | 1025.0566 |
| 52150  | 2 | 2 | 4.5  | 970  | 1 | 1 | 1 | 544.7927  |
| 52150  | 2 | 2 | 4.5  | 1550 | 1 | 1 | 1 | 621.8216  |
| 14095  | 3 | 2 | 18.5 | 1175 | 1 | 1 | 1 | 573.8093  |
| 14095  | 3 | 2 | 18.5 | 1258 | 1 | 0 | 0 | 583.8049  |
| 29708  | 4 | 3 | 9.3  | 508  | 1 | 1 | 1 | 479.2842  |
| 29708  | 4 | 3 | 9.3  | 804  | 1 | 1 | 0 | 523.2419  |
| 29708  | 4 | 3 | 9.3  | 1167 | 1 | 1 | 1 | 573.3022  |
| 123856 | 2 | 2 | 2    | 800  | 1 | 1 | 1 | 522.2855  |
| 123856 | 2 | 2 | 2    | 2027 | 1 | 1 | 1 | 682.4026  |
| 31671  | 2 | 2 | 8.4  | 1828 | 1 | 1 | 1 | 657.3256  |
| 31671  | 2 | 2 | 8.4  | 2408 | 1 | 1 | 1 | 733.3941  |
| 45894  | 2 | 2 | 7.6  | 1225 | 1 | 0 | 0 | 579.8288  |
| 45894  | 2 | 2 | 7.6  | 3551 | 1 | 1 | 1 | 1015.0332 |
| 64599  | 2 | 2 | 4.1  | 1280 | 1 | 1 | 1 | 586.2724  |
| 64599  | 2 | 2 | 4.1  | 2939 | 1 | 1 | 1 | 857.9054  |
| 29898  | 2 | 2 | 8.8  | 1653 | 1 | 1 | 1 | 634.8171  |
| 29898  | 2 | 2 | 8.8  | 2414 | 1 | 1 | 1 | 490.294   |

at Daemon interface and database TAIRplus (Van Leene et al., 2015). Proteins and peptides headers used in the table are listed be

$p < 0.01$ ); **prot\_cover**: percentage of protein sequence covered by assigned peptide matches; **pep\_query**: peptide query number; **pep\_delta**: difference between observed and calculated m/z value (precursor); **pep\_start**: start position of peptide in protein; **pep\_end**: end position of peptide in protein; **pep\_miss**: number of missed enzyme cleavage sites; **pep\_score**: peptide ions score; **pep\_ident**: peptide score identity threshold; **pep\_res\_after**: amino acid after peptide sequence; **pep\_var\_mod**: any variable modifications found in the peptide; **pep\_var\_mc**

| pep_exp_mr | pep_exp_z | pep_calc_mr | pep_delta | pep_start | pep_end | pep_miss | pep_score | pep_ident |
|------------|-----------|-------------|-----------|-----------|---------|----------|-----------|-----------|
| 1058.5214  | 2         | 1058.5219   | -0.0005   | 310       | 318     | 0        | 62.13     | 35        |
| 1138.6862  | 2         | 1138.6862   | -0.0001   | 253       | 262     | 0        | 60.11     | 28        |
| 1145.5828  | 2         | 1145.5829   | -0.0001   | 242       | 251     | 0        | 61.6      | 38        |
| 1230.5681  | 2         | 1230.5703   | -0.0022   | 381       | 390     | 0        | 70.79     | 34        |
| 1286.6522  | 2         | 1286.6541   | -0.0019   | 351       | 362     | 0        | 45.27     | 37        |
| 1295.5999  | 2         | 1295.5994   | 0.0005    | 36        | 46      | 0        | 89.28     | 36        |
| 1383.693   | 2         | 1383.6931   | -0.0001   | 163       | 174     | 0        | 79.8      | 37        |
| 1444.6409  | 2         | 1444.6405   | 0.0004    | 47        | 58      | 0        | 102.8     | 33        |
| 1445.6802  | 2         | 1445.682    | -0.0018   | 325       | 336     | 0        | 71        | 36        |
| 1637.8412  | 2         | 1637.8388   | 0.0024    | 263       | 276     | 0        | 93.19     | 37        |
| 1678.7887  | 2         | 1678.7906   | -0.0019   | 63        | 77      | 0        | 77.48     | 37        |
| 1695.8232  | 2         | 1695.8257   | -0.0024   | 337       | 350     | 0        | 71.85     | 38        |
| 1777.8558  | 2         | 1777.8557   | 0.0002    | 283       | 297     | 0        | 73.08     | 38        |
| 1821.9161  | 2         | 1821.9156   | 0.0006    | 3         | 19      | 0        | 119.17    | 38        |
| 1871.8597  | 2         | 1871.8625   | -0.0028   | 20        | 35      | 0        | 101.65    | 36        |
| 1950.881   | 2         | 1950.8815   | -0.0006   | 363       | 379     | 0        | 145.27    | 35        |
| 1971.989   | 2         | 1971.9902   | -0.0012   | 104       | 121     | 0        | 141.86    | 37        |
| 2100.0858  | 3         | 2100.0851   | 0.0006    | 104       | 122     | 1        | 65        | 36        |
| 2125.0502  | 3         | 2125.0521   | -0.0018   | 1         | 19      | 1        | 45.09     | 37        |
| 2766.3134  | 3         | 2766.3139   | -0.0005   | 217       | 241     | 0        | 64.24     | 36        |
| 2801.2931  | 3         | 2801.2946   | -0.0015   | 78        | 103     | 1        | 86.87     | 35        |
| 3398.4946  | 3         | 3398.5      | -0.0054   | 123       | 154     | 0        | 49.99     | 31        |
| 975.4695   | 2         | 975.4695    | 0         | 351       | 359     | 0        | 77.48     | 37        |
| 1026.5495  | 2         | 1026.5498   | -0.0003   | 310       | 318     | 0        | 78.35     | 34        |
| 1138.6862  | 2         | 1138.6862   | -0.0001   | 253       | 262     | 0        | 60.11     | 28        |
| 1145.5828  | 2         | 1145.5829   | -0.0001   | 242       | 251     | 0        | 61.6      | 38        |
| 1230.5681  | 2         | 1230.5703   | -0.0022   | 381       | 390     | 0        | 70.79     | 34        |
| 1298.6137  | 2         | 1298.6143   | -0.0006   | 47        | 58      | 0        | 91.27     | 35        |
| 1417.6443  | 2         | 1417.6444   | -0.0001   | 163       | 174     | 0        | 82.16     | 34        |
| 1493.6484  | 2         | 1493.649    | -0.0006   | 325       | 336     | 0        | 77.19     | 32        |
| 1637.8412  | 2         | 1637.8388   | 0.0024    | 263       | 276     | 0        | 93.19     | 37        |
| 1678.7887  | 2         | 1678.7906   | -0.0019   | 63        | 77      | 0        | 77.48     | 37        |
| 1695.8232  | 2         | 1695.8257   | -0.0024   | 337       | 350     | 0        | 71.85     | 38        |
| 1821.9161  | 2         | 1821.9156   | 0.0006    | 3         | 19      | 0        | 119.17    | 38        |
| 1950.881   | 2         | 1950.8815   | -0.0006   | 363       | 379     | 0        | 145.27    | 35        |
| 1971.989   | 2         | 1971.9902   | -0.0012   | 104       | 121     | 0        | 141.86    | 37        |
| 2100.0858  | 3         | 2100.0851   | 0.0006    | 104       | 122     | 1        | 65        | 36        |
| 2125.0502  | 3         | 2125.0521   | -0.0018   | 1         | 19      | 1        | 45.09     | 37        |
| 2366.1192  | 2         | 2366.1212   | -0.002    | 277       | 297     | 0        | 48.54     | 37        |
| 2763.3137  | 3         | 2763.3143   | -0.0005   | 217       | 241     | 0        | 81.66     | 37        |
| 2797.3339  | 3         | 2797.3361   | -0.0022   | 78        | 103     | 1        | 67.22     | 37        |
| 3199.4635  | 3         | 3199.4669   | -0.0035   | 20        | 46      | 0        | 93.67     | 35        |
| 1058.5214  | 2         | 1058.5219   | -0.0005   | 310       | 318     | 0        | 62.13     | 35        |
| 1138.6862  | 2         | 1138.6862   | -0.0001   | 253       | 262     | 0        | 60.11     | 28        |
| 1145.5828  | 2         | 1145.5829   | -0.0001   | 242       | 251     | 0        | 61.6      | 38        |
| 1230.5681  | 2         | 1230.5703   | -0.0022   | 381       | 390     | 0        | 70.79     | 34        |
| 1286.6522  | 2         | 1286.6541   | -0.0019   | 351       | 362     | 0        | 45.27     | 37        |
| 1383.693   | 2         | 1383.6931   | -0.0001   | 163       | 174     | 0        | 79.8      | 37        |

|           |   |           |         |     |     |   |        |    |
|-----------|---|-----------|---------|-----|-----|---|--------|----|
| 1430.624  | 2 | 1430.6248 | -0.0009 | 47  | 58  | 0 | 88.21  | 32 |
| 1445.6802 | 2 | 1445.682  | -0.0018 | 325 | 336 | 0 | 71     | 36 |
| 1637.8412 | 2 | 1637.8388 | 0.0024  | 263 | 276 | 0 | 93.19  | 37 |
| 1664.7731 | 2 | 1664.775  | -0.0019 | 63  | 77  | 0 | 72.11  | 36 |
| 1695.8232 | 2 | 1695.8257 | -0.0024 | 337 | 350 | 0 | 71.85  | 38 |
| 1821.9161 | 2 | 1821.9156 | 0.0006  | 3   | 19  | 0 | 119.17 | 38 |
| 1950.881  | 2 | 1950.8815 | -0.0006 | 363 | 379 | 0 | 145.27 | 35 |
| 1971.989  | 2 | 1971.9902 | -0.0012 | 104 | 121 | 0 | 141.86 | 37 |
| 2100.0858 | 3 | 2100.0851 | 0.0006  | 104 | 122 | 1 | 65     | 36 |
| 2125.0502 | 3 | 2125.0521 | -0.0018 | 1   | 19  | 1 | 45.09  | 37 |
| 2766.3134 | 3 | 2766.3139 | -0.0005 | 217 | 241 | 0 | 64.24  | 36 |
| 2813.3296 | 3 | 2813.331  | -0.0015 | 78  | 103 | 1 | 86.5   | 36 |
| 3398.4946 | 3 | 3398.5    | -0.0054 | 123 | 154 | 0 | 49.99  | 31 |
| 1058.5214 | 2 | 1058.5219 | -0.0005 | 310 | 318 | 0 | 62.13  | 35 |
| 1138.6862 | 2 | 1138.6862 | -0.0001 | 253 | 262 | 0 | 60.11  | 28 |
| 1145.5828 | 2 | 1145.5829 | -0.0001 | 242 | 251 | 0 | 61.6   | 38 |
| 1230.5681 | 2 | 1230.5703 | -0.0022 | 381 | 390 | 0 | 70.79  | 34 |
| 1286.6522 | 2 | 1286.6541 | -0.0019 | 351 | 362 | 0 | 45.27  | 37 |
| 1307.6344 | 2 | 1307.6357 | -0.0013 | 36  | 46  | 0 | 52.18  | 38 |
| 1417.6443 | 2 | 1417.6444 | -0.0001 | 163 | 174 | 0 | 82.16  | 34 |
| 1430.624  | 2 | 1430.6248 | -0.0009 | 47  | 58  | 0 | 88.21  | 32 |
| 1445.6802 | 2 | 1445.682  | -0.0018 | 325 | 336 | 0 | 71     | 36 |
| 1637.8412 | 2 | 1637.8388 | 0.0024  | 263 | 276 | 0 | 93.19  | 37 |
| 1664.7731 | 2 | 1664.775  | -0.0019 | 63  | 77  | 0 | 72.11  | 36 |
| 1695.8232 | 2 | 1695.8257 | -0.0024 | 337 | 350 | 0 | 71.85  | 38 |
| 1898.9268 | 2 | 1898.9275 | -0.0007 | 20  | 35  | 0 | 119.2  | 37 |
| 1950.881  | 2 | 1950.8815 | -0.0006 | 363 | 379 | 0 | 145.27 | 35 |
| 1971.989  | 2 | 1971.9902 | -0.0012 | 104 | 121 | 0 | 141.86 | 37 |
| 2100.0858 | 3 | 2100.0851 | 0.0006  | 104 | 122 | 1 | 65     | 36 |
| 2736.3018 | 3 | 2736.3034 | -0.0015 | 217 | 241 | 0 | 40.19  | 37 |
| 2813.3296 | 3 | 2813.331  | -0.0015 | 78  | 103 | 1 | 86.5   | 36 |
| 3398.4946 | 3 | 3398.5    | -0.0054 | 123 | 154 | 0 | 49.99  | 31 |
| 1001.5496 | 2 | 1001.5505 | -0.001  | 456 | 464 | 1 | 45.3   | 38 |
| 1214.6432 | 2 | 1214.6441 | -0.0009 | 164 | 175 | 0 | 80.8   | 37 |
| 1227.6204 | 2 | 1227.6207 | -0.0003 | 29  | 39  | 0 | 46.57  | 35 |
| 1293.6179 | 2 | 1293.6176 | 0.0003  | 243 | 252 | 0 | 45.32  | 37 |
| 1328.6068 | 2 | 1328.6071 | -0.0003 | 308 | 317 | 0 | 72.87  | 35 |
| 1357.6074 | 2 | 1357.6084 | -0.001  | 546 | 556 | 0 | 67.42  | 34 |
| 1385.7208 | 2 | 1385.7224 | -0.0016 | 604 | 615 | 0 | 57.7   | 37 |
| 1425.7568 | 2 | 1425.7576 | -0.0008 | 335 | 348 | 0 | 68.99  | 36 |
| 1435.7458 | 2 | 1435.746  | -0.0001 | 352 | 363 | 0 | 56.99  | 37 |
| 1472.6779 | 2 | 1472.6783 | -0.0004 | 40  | 52  | 0 | 67.58  | 35 |
| 1539.75   | 2 | 1539.7504 | -0.0004 | 306 | 317 | 1 | 62.39  | 37 |
| 1565.8018 | 2 | 1565.8011 | 0.0008  | 117 | 130 | 0 | 91     | 37 |
| 1662.803  | 2 | 1662.8036 | -0.0006 | 60  | 74  | 0 | 107.58 | 38 |
| 1674.7215 | 2 | 1674.7234 | -0.0019 | 227 | 242 | 0 | 93.87  | 32 |
| 1679.8254 | 2 | 1679.8267 | -0.0013 | 145 | 159 | 0 | 43.45  | 38 |
| 2559.2444 | 2 | 2559.2452 | -0.0008 | 368 | 393 | 0 | 137.6  | 37 |
| 2587.2104 | 3 | 2587.2126 | -0.0022 | 5   | 28  | 0 | 57.62  | 36 |
| 2657.2612 | 2 | 2657.2609 | 0.0003  | 431 | 453 | 0 | 102.9  | 37 |
| 2764.1305 | 3 | 2764.1341 | -0.0036 | 616 | 646 | 0 | 83.49  | 27 |
| 3025.4905 | 3 | 3024.4815 | 1.0089  | 279 | 305 | 0 | 53.72  | 36 |
| 3050.6908 | 3 | 3050.6937 | -0.003  | 394 | 422 | 0 | 29.47  | 28 |
| 949.4865  | 2 | 949.4869  | -0.0004 | 129 | 137 | 0 | 42.67  | 37 |
| 957.512   | 2 | 957.5131  | -0.0011 | 118 | 125 | 0 | 48.79  | 36 |
| 1016.5388 | 2 | 1016.539  | -0.0002 | 245 | 253 | 0 | 40.32  | 38 |
| 1113.6759 | 2 | 1113.6758 | 0.0002  | 331 | 340 | 0 | 78.91  | 31 |
| 1141.5658 | 2 | 1141.5663 | -0.0005 | 138 | 148 | 0 | 61.91  | 35 |

|           |   |           |         |     |     |   |        |    |
|-----------|---|-----------|---------|-----|-----|---|--------|----|
| 1172.6407 | 2 | 1172.6401 | 0.0006  | 244 | 253 | 1 | 53.88  | 37 |
| 1400.725  | 2 | 1400.726  | -0.0009 | 76  | 89  | 0 | 110.4  | 37 |
| 1446.7445 | 2 | 1446.7467 | -0.0022 | 376 | 388 | 0 | 89.76  | 38 |
| 1501.8715 | 2 | 1501.8729 | -0.0014 | 153 | 167 | 0 | 98.55  | 30 |
| 1574.8407 | 2 | 1574.8417 | -0.001  | 375 | 388 | 1 | 105.36 | 36 |
| 1586.6944 | 2 | 1586.6956 | -0.0012 | 184 | 196 | 0 | 96.88  | 33 |
| 1783.7522 | 3 | 1783.7544 | -0.0022 | 302 | 317 | 0 | 39.96  | 31 |
| 1826.9303 | 2 | 1826.9315 | -0.0012 | 53  | 68  | 1 | 105.81 | 37 |
| 1919.9944 | 2 | 1919.988  | 0.0064  | 396 | 412 | 0 | 68.53  | 37 |
| 2026.8861 | 3 | 2026.8875 | -0.0015 | 300 | 317 | 1 | 72.91  | 33 |
| 2058.081  | 2 | 2058.082  | -0.0009 | 213 | 231 | 0 | 110.23 | 36 |
| 2894.4922 | 3 | 2894.4927 | -0.0005 | 341 | 365 | 0 | 107.19 | 35 |
| 3136.6048 | 3 | 3136.6049 | -0.0002 | 90  | 117 | 0 | 57.86  | 35 |
| 902.4199  | 2 | 902.4208  | -0.0008 | 395 | 401 | 0 | 34.3   | 33 |
| 986.5392  | 2 | 986.5397  | -0.0005 | 327 | 336 | 0 | 70.01  | 37 |
| 1282.4969 | 2 | 1282.4967 | 0.0003  | 312 | 320 | 0 | 33.05  | 24 |
| 1472.857  | 2 | 1472.8562 | 0.0008  | 230 | 243 | 0 | 93.57  | 31 |
| 1597.7595 | 2 | 1597.7599 | -0.0004 | 340 | 352 | 0 | 67.05  | 37 |
| 1689.8784 | 2 | 1689.8798 | -0.0014 | 216 | 229 | 1 | 74.44  | 37 |
| 1700.8972 | 2 | 1700.8985 | -0.0013 | 65  | 79  | 0 | 90.55  | 37 |
| 1791.9217 | 2 | 1791.9229 | -0.0012 | 265 | 280 | 0 | 89.22  | 38 |
| 1856.8754 | 2 | 1856.8761 | -0.0006 | 374 | 390 | 0 | 104.15 | 37 |
| 1884.9377 | 2 | 1884.9404 | -0.0027 | 353 | 370 | 0 | 69.05  | 37 |
| 1976.8762 | 2 | 1976.8752 | 0.0009  | 41  | 60  | 0 | 125.64 | 34 |
| 2345.0034 | 3 | 2345.0059 | -0.0025 | 403 | 422 | 0 | 51.27  | 32 |
| 2384.1856 | 3 | 2384.1873 | -0.0016 | 85  | 105 | 1 | 79.51  | 37 |
| 2394.1842 | 2 | 2394.1856 | -0.0013 | 244 | 264 | 0 | 88.14  | 37 |
| 2640.2193 | 3 | 2640.22   | -0.0006 | 281 | 304 | 0 | 68.27  | 36 |
| 3192.6229 | 3 | 3192.6238 | -0.0009 | 125 | 156 | 0 | 80.96  | 35 |
| 902.4199  | 2 | 902.4208  | -0.0008 | 395 | 401 | 0 | 34.3   | 33 |
| 986.5392  | 2 | 986.5397  | -0.0005 | 327 | 336 | 0 | 70.01  | 37 |
| 1282.4969 | 2 | 1282.4967 | 0.0003  | 312 | 320 | 0 | 33.05  | 24 |
| 1472.857  | 2 | 1472.8562 | 0.0008  | 230 | 243 | 0 | 93.57  | 31 |
| 1597.7595 | 2 | 1597.7599 | -0.0004 | 340 | 352 | 0 | 67.05  | 37 |
| 1662.8629 | 2 | 1662.8689 | -0.006  | 216 | 229 | 1 | 47.44  | 38 |
| 1700.8972 | 2 | 1700.8985 | -0.0013 | 65  | 79  | 0 | 90.55  | 37 |
| 1791.9217 | 2 | 1791.9229 | -0.0012 | 265 | 280 | 0 | 89.22  | 38 |
| 1856.8754 | 2 | 1856.8761 | -0.0006 | 374 | 390 | 0 | 104.15 | 37 |
| 1884.9377 | 2 | 1884.9404 | -0.0027 | 353 | 370 | 0 | 69.05  | 37 |
| 1976.8762 | 2 | 1976.8752 | 0.0009  | 41  | 60  | 0 | 125.64 | 34 |
| 2345.0034 | 3 | 2345.0059 | -0.0025 | 403 | 422 | 0 | 51.27  | 32 |
| 2384.1856 | 3 | 2384.1873 | -0.0016 | 85  | 105 | 1 | 79.51  | 37 |
| 2394.1842 | 2 | 2394.1856 | -0.0013 | 244 | 264 | 0 | 88.14  | 37 |
| 2640.2193 | 3 | 2640.22   | -0.0006 | 281 | 304 | 0 | 68.27  | 36 |
| 3192.6229 | 3 | 3192.6238 | -0.0009 | 125 | 156 | 0 | 80.96  | 35 |
| 934.5121  | 2 | 934.5124  | -0.0003 | 129 | 137 | 0 | 55.37  | 35 |
| 957.512   | 2 | 957.5131  | -0.0011 | 118 | 125 | 0 | 48.79  | 36 |
| 975.5501  | 2 | 975.5502  | -0.0001 | 376 | 384 | 0 | 64.35  | 36 |
| 1016.5388 | 2 | 1016.539  | -0.0002 | 245 | 253 | 0 | 40.32  | 38 |
| 1103.6444 | 2 | 1103.6451 | -0.0007 | 375 | 384 | 1 | 46.85  | 33 |
| 1113.6759 | 2 | 1113.6758 | 0.0002  | 331 | 340 | 0 | 78.91  | 31 |
| 1141.5658 | 2 | 1141.5663 | -0.0005 | 138 | 148 | 0 | 61.91  | 35 |
| 1172.6407 | 2 | 1172.6401 | 0.0006  | 244 | 253 | 1 | 53.88  | 37 |
| 1400.725  | 2 | 1400.726  | -0.0009 | 76  | 89  | 0 | 110.4  | 37 |
| 1501.8715 | 2 | 1501.8729 | -0.0014 | 153 | 167 | 0 | 98.55  | 30 |
| 1586.6944 | 2 | 1586.6956 | -0.0012 | 184 | 196 | 0 | 96.88  | 33 |
| 1783.7522 | 3 | 1783.7544 | -0.0022 | 302 | 317 | 0 | 39.96  | 31 |
| 1826.9303 | 2 | 1826.9315 | -0.0012 | 53  | 68  | 1 | 105.81 | 37 |

|           |   |           |         |     |     |   |        |    |
|-----------|---|-----------|---------|-----|-----|---|--------|----|
| 1919.9944 | 2 | 1919.988  | 0.0064  | 396 | 412 | 0 | 68.53  | 37 |
| 2026.8861 | 3 | 2026.8875 | -0.0015 | 300 | 317 | 1 | 72.91  | 33 |
| 2058.081  | 2 | 2058.082  | -0.0009 | 213 | 231 | 0 | 110.23 | 36 |
| 2894.4922 | 3 | 2894.4927 | -0.0005 | 341 | 365 | 0 | 107.19 | 35 |
| 1001.5496 | 2 | 1001.5505 | -0.001  | 456 | 464 | 1 | 45.3   | 38 |
| 1214.6432 | 2 | 1214.6441 | -0.0009 | 164 | 175 | 0 | 80.8   | 37 |
| 1225.5833 | 2 | 1225.5827 | 0.0006  | 81  | 91  | 0 | 61.65  | 36 |
| 1227.6204 | 2 | 1227.6207 | -0.0003 | 29  | 39  | 0 | 46.57  | 35 |
| 1293.6179 | 2 | 1293.6176 | 0.0003  | 243 | 252 | 0 | 45.32  | 37 |
| 1294.6558 | 2 | 1294.6557 | 0       | 308 | 317 | 0 | 55.71  | 37 |
| 1307.6973 | 2 | 1307.6972 | 0       | 133 | 144 | 0 | 71.15  | 36 |
| 1357.6074 | 2 | 1357.6084 | -0.001  | 546 | 556 | 0 | 67.42  | 34 |
| 1385.7208 | 2 | 1385.7224 | -0.0016 | 604 | 615 | 0 | 57.7   | 37 |
| 1406.7557 | 2 | 1406.7558 | -0.0001 | 352 | 363 | 0 | 73.03  | 35 |
| 1430.7356 | 2 | 1430.7365 | -0.0009 | 335 | 348 | 0 | 110.3  | 37 |
| 1472.6779 | 2 | 1472.6783 | -0.0004 | 40  | 52  | 0 | 67.58  | 35 |
| 1521.7941 | 3 | 1521.7939 | 0.0002  | 306 | 317 | 1 | 50.44  | 37 |
| 1674.7215 | 2 | 1674.7234 | -0.0019 | 227 | 242 | 0 | 93.87  | 32 |
| 1676.817  | 2 | 1676.8192 | -0.0022 | 60  | 74  | 0 | 104.05 | 38 |
| 1679.8254 | 2 | 1679.8267 | -0.0013 | 145 | 159 | 0 | 43.45  | 38 |
| 2573.2578 | 2 | 2573.2609 | -0.003  | 368 | 393 | 0 | 114    | 37 |
| 2587.2104 | 3 | 2587.2126 | -0.0022 | 5   | 28  | 0 | 57.62  | 36 |
| 2657.2612 | 2 | 2657.2609 | 0.0003  | 431 | 453 | 0 | 102.9  | 37 |
| 2975.4764 | 2 | 2974.4812 | 0.9953  | 279 | 305 | 0 | 107.94 | 36 |
| 891.5066  | 2 | 891.5066  | 0.0001  | 508 | 515 | 0 | 35.54  | 34 |
| 932.4606  | 2 | 932.4603  | 0.0002  | 411 | 418 | 0 | 42.03  | 38 |
| 954.565   | 2 | 954.5651  | 0       | 461 | 468 | 0 | 35.16  | 31 |
| 1090.5905 | 2 | 1090.591  | -0.0005 | 496 | 504 | 0 | 59.47  | 36 |
| 1160.5728 | 2 | 1160.5727 | 0.0001  | 290 | 299 | 0 | 60.19  | 37 |
| 1162.634  | 2 | 1162.6346 | -0.0006 | 395 | 403 | 1 | 52.31  | 36 |
| 1198.6335 | 2 | 1198.6346 | -0.0011 | 280 | 289 | 0 | 41.35  | 35 |
| 1332.7108 | 2 | 1332.7112 | -0.0003 | 219 | 230 | 0 | 67.97  | 37 |
| 1381.5803 | 2 | 1381.5795 | 0.0008  | 354 | 364 | 0 | 63.92  | 32 |
| 1392.7397 | 2 | 1392.7402 | -0.0005 | 427 | 439 | 0 | 37.85  | 36 |
| 1608.8709 | 2 | 1608.8722 | -0.0013 | 310 | 324 | 0 | 72.92  | 35 |
| 1650.8105 | 2 | 1650.8114 | -0.0009 | 169 | 183 | 0 | 59.16  | 38 |
| 1701.7298 | 2 | 1701.7304 | -0.0006 | 258 | 273 | 0 | 113.51 | 31 |
| 1719.8673 | 2 | 1719.8679 | -0.0005 | 516 | 530 | 0 | 113.45 | 38 |
| 1970.0457 | 2 | 1970.0473 | -0.0015 | 478 | 495 | 0 | 68.61  | 35 |
| 2196.0994 | 2 | 2196.1022 | -0.0028 | 197 | 218 | 0 | 88.14  | 37 |
| 2640.3462 | 3 | 2640.3469 | -0.0007 | 365 | 386 | 0 | 90.09  | 36 |
| 2704.1905 | 3 | 2704.1906 | -0.0001 | 146 | 168 | 0 | 54.13  | 33 |
| 2782.3847 | 3 | 2782.3847 | -0.0001 | 326 | 353 | 0 | 60.94  | 37 |
| 3156.6139 | 3 | 3156.6125 | 0.0014  | 116 | 145 | 0 | 67.56  | 34 |
| 1003.4752 | 2 | 1003.4757 | -0.0004 | 351 | 359 | 0 | 42.11  | 36 |
| 1058.5214 | 2 | 1058.5219 | -0.0005 | 310 | 318 | 0 | 62.13  | 35 |
| 1138.6862 | 2 | 1138.6862 | -0.0001 | 253 | 262 | 0 | 60.11  | 28 |
| 1145.5828 | 2 | 1145.5829 | -0.0001 | 242 | 251 | 0 | 61.6   | 38 |
| 1230.5681 | 2 | 1230.5703 | -0.0022 | 381 | 390 | 0 | 70.79  | 34 |
| 1292.6348 | 2 | 1292.6361 | -0.0013 | 36  | 46  | 0 | 71.58  | 38 |
| 1383.693  | 2 | 1383.6931 | -0.0001 | 163 | 174 | 0 | 79.8   | 37 |
| 1430.624  | 2 | 1430.6248 | -0.0009 | 47  | 58  | 0 | 88.21  | 32 |
| 1445.6802 | 2 | 1445.682  | -0.0018 | 325 | 336 | 0 | 71     | 36 |
| 1637.8412 | 2 | 1637.8388 | 0.0024  | 263 | 276 | 0 | 93.19  | 37 |
| 1695.8232 | 2 | 1695.8257 | -0.0024 | 337 | 350 | 0 | 71.85  | 38 |
| 1955.9954 | 3 | 1955.9953 | 0.0001  | 104 | 121 | 0 | 58.48  | 37 |
| 2766.3134 | 3 | 2766.3139 | -0.0005 | 217 | 241 | 0 | 64.24  | 36 |
| 2827.3608 | 3 | 2827.3467 | 0.0141  | 78  | 103 | 1 | 38.73  | 37 |

|           |   |           |         |     |     |   |        |    |
|-----------|---|-----------|---------|-----|-----|---|--------|----|
| 3398.4946 | 3 | 3398.5    | -0.0054 | 123 | 154 | 0 | 49.99  | 31 |
| 1001.5496 | 2 | 1001.5505 | -0.001  | 456 | 464 | 1 | 45.3   | 38 |
| 1110.4932 | 2 | 1110.4942 | -0.001  | 81  | 90  | 0 | 57.44  | 34 |
| 1196.6875 | 2 | 1196.6877 | -0.0002 | 164 | 175 | 0 | 78.34  | 33 |
| 1227.6204 | 2 | 1227.6207 | -0.0003 | 29  | 39  | 0 | 46.57  | 35 |
| 1293.6179 | 2 | 1293.6176 | 0.0003  | 243 | 252 | 0 | 45.32  | 37 |
| 1357.6074 | 2 | 1357.6084 | -0.001  | 546 | 556 | 0 | 67.42  | 34 |
| 1435.7458 | 2 | 1435.746  | -0.0001 | 352 | 363 | 0 | 56.99  | 37 |
| 1472.6779 | 2 | 1472.6783 | -0.0004 | 40  | 52  | 0 | 67.58  | 35 |
| 1662.803  | 2 | 1662.8036 | -0.0006 | 60  | 74  | 0 | 107.58 | 38 |
| 1674.7215 | 2 | 1674.7234 | -0.0019 | 227 | 242 | 0 | 93.87  | 32 |
| 1679.8254 | 2 | 1679.8267 | -0.0013 | 145 | 159 | 0 | 43.45  | 38 |
| 2573.2578 | 2 | 2573.2609 | -0.003  | 368 | 393 | 0 | 114    | 37 |
| 2587.2104 | 3 | 2587.2126 | -0.0022 | 5   | 28  | 0 | 57.62  | 36 |
| 3149.4826 | 3 | 3148.4724 | 1.0102  | 575 | 601 | 1 | 49.01  | 36 |
| 761.443   | 2 | 761.4436  | -0.0005 | 170 | 175 | 0 | 35.88  | 35 |
| 934.5121  | 2 | 934.5124  | -0.0003 | 131 | 139 | 0 | 55.37  | 35 |
| 957.512   | 2 | 957.5131  | -0.0011 | 120 | 127 | 0 | 48.79  | 36 |
| 1016.5388 | 2 | 1016.539  | -0.0002 | 247 | 255 | 0 | 40.32  | 38 |
| 1113.6759 | 2 | 1113.6758 | 0.0002  | 333 | 342 | 0 | 78.91  | 31 |
| 1172.6407 | 2 | 1172.6401 | 0.0006  | 246 | 255 | 1 | 53.88  | 37 |
| 1400.725  | 2 | 1400.726  | -0.0009 | 78  | 91  | 0 | 110.4  | 37 |
| 1586.6944 | 2 | 1586.6956 | -0.0012 | 186 | 198 | 0 | 96.88  | 33 |
| 1783.7522 | 3 | 1783.7544 | -0.0022 | 304 | 319 | 0 | 39.96  | 31 |
| 1826.9303 | 2 | 1826.9315 | -0.0012 | 55  | 70  | 1 | 105.81 | 37 |
| 1919.9944 | 2 | 1919.988  | 0.0064  | 398 | 414 | 0 | 68.53  | 37 |
| 2026.8861 | 3 | 2026.8875 | -0.0015 | 302 | 319 | 1 | 72.91  | 33 |
| 2894.4922 | 3 | 2894.4927 | -0.0005 | 343 | 367 | 0 | 107.19 | 35 |
| 902.4199  | 2 | 902.4208  | -0.0008 | 395 | 401 | 0 | 34.3   | 33 |
| 986.5392  | 2 | 986.5397  | -0.0005 | 327 | 336 | 0 | 70.01  | 37 |
| 1282.4969 | 2 | 1282.4967 | 0.0003  | 312 | 320 | 0 | 33.05  | 24 |
| 1530.8985 | 2 | 1530.8981 | 0.0004  | 230 | 243 | 0 | 117.02 | 28 |
| 1583.7435 | 2 | 1583.7443 | -0.0008 | 340 | 352 | 0 | 80.01  | 36 |
| 1690.8613 | 2 | 1690.8638 | -0.0025 | 216 | 229 | 1 | 58.51  | 38 |
| 1700.8972 | 2 | 1700.8985 | -0.0013 | 65  | 79  | 0 | 90.55  | 37 |
| 1749.9117 | 3 | 1749.9124 | -0.0007 | 265 | 280 | 0 | 40.32  | 37 |
| 1883.8872 | 2 | 1883.887  | 0.0002  | 374 | 390 | 0 | 96.14  | 37 |
| 1884.9377 | 2 | 1884.9404 | -0.0027 | 353 | 370 | 0 | 69.05  | 37 |
| 2345.0034 | 3 | 2345.0059 | -0.0025 | 403 | 422 | 0 | 51.27  | 32 |
| 2384.1856 | 3 | 2384.1873 | -0.0016 | 85  | 105 | 1 | 79.51  | 37 |
| 2408.2008 | 2 | 2408.2012 | -0.0004 | 244 | 264 | 0 | 99.31  | 37 |
| 2694.2654 | 3 | 2694.2669 | -0.0015 | 281 | 304 | 0 | 49.78  | 36 |
| 3192.6229 | 3 | 3192.6238 | -0.0009 | 125 | 156 | 0 | 80.96  | 35 |
| 1247.6758 | 2 | 1247.6761 | -0.0004 | 393 | 403 | 0 | 70.72  | 36 |
| 1248.5575 | 2 | 1248.5582 | -0.0007 | 547 | 558 | 0 | 62.19  | 34 |
| 1255.6115 | 2 | 1255.6118 | -0.0003 | 173 | 183 | 1 | 54.59  | 36 |
| 1293.5734 | 2 | 1293.5758 | -0.0024 | 618 | 629 | 0 | 51.25  | 34 |
| 1326.6297 | 2 | 1326.6303 | -0.0006 | 581 | 592 | 0 | 71.32  | 36 |
| 1360.7344 | 2 | 1360.7351 | -0.0006 | 160 | 172 | 0 | 56.36  | 37 |
| 1432.7232 | 2 | 1432.7232 | 0       | 377 | 389 | 0 | 93.27  | 38 |
| 1476.7558 | 2 | 1476.7573 | -0.0015 | 107 | 120 | 0 | 96.67  | 38 |
| 1812.9477 | 2 | 1812.9469 | 0.0009  | 601 | 617 | 0 | 144.04 | 36 |
| 1821.8932 | 2 | 1821.8931 | 0.0001  | 218 | 234 | 0 | 78.45  | 38 |
| 1838.8824 | 2 | 1838.8833 | -0.0009 | 467 | 483 | 0 | 60.12  | 37 |
| 3077.4622 | 3 | 3077.4618 | 0.0004  | 264 | 290 | 1 | 51.47  | 36 |
| 773.4281  | 2 | 773.4283  | -0.0002 | 303 | 310 | 0 | 45.65  | 38 |
| 1118.5142 | 2 | 1118.5145 | -0.0003 | 51  | 59  | 0 | 36.6   | 35 |
| 1139.6367 | 2 | 1139.6373 | -0.0006 | 328 | 337 | 0 | 41.39  | 33 |

|           |   |           |         |      |      |   |        |    |
|-----------|---|-----------|---------|------|------|---|--------|----|
| 1433.7499 | 2 | 1433.7514 | -0.0015 | 205  | 219  | 0 | 71.01  | 38 |
| 1497.8403 | 2 | 1497.8403 | 0       | 239  | 252  | 0 | 122    | 34 |
| 1675.9657 | 3 | 1675.9661 | -0.0005 | 70   | 84   | 1 | 47.87  | 29 |
| 1760.7784 | 2 | 1760.7794 | -0.001  | 314  | 327  | 0 | 87.68  | 33 |
| 2032.0647 | 3 | 2032.0663 | -0.0017 | 172  | 190  | 0 | 66.97  | 37 |
| 2171.0008 | 2 | 2171.0019 | -0.001  | 276  | 295  | 0 | 136.15 | 36 |
| 2249.062  | 2 | 2249.0668 | -0.0047 | 146  | 166  | 0 | 106.63 | 37 |
| 847.4914  | 2 | 847.4916  | -0.0002 | 445  | 452  | 0 | 61.37  | 35 |
| 971.5283  | 2 | 971.5287  | -0.0005 | 41   | 48   | 0 | 44.07  | 36 |
| 987.5545  | 2 | 987.5535  | 0.0009  | 353  | 361  | 0 | 61.22  | 37 |
| 1151.5928 | 2 | 1151.5935 | -0.0007 | 1073 | 1082 | 0 | 39.58  | 37 |
| 1268.7092 | 2 | 1268.7088 | 0.0003  | 512  | 524  | 0 | 70.24  | 34 |
| 1275.6427 | 2 | 1275.6427 | -0.0001 | 230  | 240  | 0 | 73.87  | 38 |
| 1405.8029 | 3 | 1405.8041 | -0.0013 | 832  | 844  | 0 | 32.42  | 31 |
| 1467.7749 | 2 | 1467.7755 | -0.0007 | 599  | 611  | 0 | 53.34  | 36 |
| 1498.7492 | 2 | 1498.749  | 0.0002  | 389  | 400  | 0 | 81.69  | 37 |
| 1567.8252 | 2 | 1567.8246 | 0.0006  | 273  | 285  | 0 | 49.86  | 36 |
| 1964.014  | 2 | 1964.0136 | 0.0004  | 191  | 209  | 0 | 116.06 | 37 |
| 2240.2258 | 2 | 2240.2264 | -0.0005 | 49   | 70   | 0 | 131.5  | 32 |
| 792.4378  | 2 | 792.4382  | -0.0003 | 219  | 225  | 0 | 46.14  | 35 |
| 815.4863  | 2 | 815.4865  | -0.0002 | 121  | 127  | 0 | 40.72  | 35 |
| 1173.6067 | 2 | 1173.607  | -0.0003 | 191  | 200  | 0 | 73.56  | 38 |
| 1478.772  | 2 | 1478.7729 | -0.0009 | 147  | 158  | 1 | 72.03  | 37 |
| 1514.708  | 2 | 1514.7101 | -0.002  | 354  | 368  | 0 | 114.13 | 36 |
| 1681.8252 | 2 | 1681.8311 | -0.006  | 88   | 101  | 0 | 65.64  | 37 |
| 1828.9936 | 2 | 1828.9903 | 0.0033  | 312  | 328  | 0 | 143.5  | 35 |
| 1845.8476 | 2 | 1845.8493 | -0.0017 | 159  | 174  | 0 | 71.23  | 35 |
| 2157.0753 | 3 | 2156.0724 | 1.0029  | 129  | 146  | 1 | 37.7   | 37 |
| 799.5279  | 2 | 799.528   | 0       | 64   | 70   | 1 | 31.2   | 28 |
| 975.4405  | 2 | 975.441   | -0.0005 | 21   | 30   | 0 | 76.81  | 33 |
| 1162.5897 | 2 | 1162.5903 | -0.0006 | 318  | 328  | 0 | 38.75  | 38 |
| 1191.5216 | 2 | 1191.523  | -0.0015 | 199  | 208  | 0 | 63.71  | 33 |
| 1197.6977 | 2 | 1197.6982 | -0.0005 | 31   | 41   | 1 | 63.23  | 33 |
| 1474.6673 | 2 | 1474.6688 | -0.0015 | 362  | 374  | 0 | 81.3   | 34 |
| 1773.8881 | 2 | 1773.8897 | -0.0016 | 241  | 256  | 0 | 103.28 | 38 |
| 1854.9245 | 2 | 1854.9251 | -0.0006 | 218  | 233  | 0 | 102.35 | 37 |
| 2198.0658 | 2 | 2198.0678 | -0.0019 | 294  | 314  | 0 | 98.76  | 37 |
| 3150.6331 | 3 | 3150.635  | -0.0019 | 150  | 179  | 0 | 102.31 | 34 |
| 1094.6378 | 2 | 1094.6376 | 0.0003  | 382  | 390  | 0 | 39.47  | 31 |
| 1156.644  | 2 | 1156.6452 | -0.0012 | 316  | 326  | 0 | 101.72 | 36 |
| 1388.6627 | 2 | 1388.6646 | -0.0019 | 330  | 341  | 0 | 66.59  | 36 |
| 1434.6628 | 2 | 1434.6626 | 0.0001  | 113  | 124  | 1 | 76.55  | 36 |
| 1680.9401 | 2 | 1680.941  | -0.0009 | 342  | 357  | 0 | 108.74 | 32 |
| 1767.7799 | 3 | 1767.7787 | 0.0011  | 143  | 157  | 0 | 50.62  | 34 |
| 1827.9573 | 2 | 1827.9587 | -0.0013 | 441  | 456  | 0 | 64     | 36 |
| 1906.0435 | 2 | 1906.0445 | -0.001  | 93   | 112  | 0 | 64.25  | 33 |
| 2134.131  | 2 | 2134.131  | 0       | 283  | 301  | 0 | 72.23  | 35 |
| 797.5128  | 2 | 797.5123  | 0.0005  | 307  | 313  | 0 | 41.58  | 27 |
| 971.5381  | 2 | 971.54    | -0.0019 | 566  | 574  | 0 | 42.93  | 37 |
| 1028.5608 | 2 | 1028.5614 | -0.0007 | 330  | 339  | 0 | 49.41  | 36 |
| 1037.5204 | 2 | 1037.5216 | -0.0012 | 829  | 836  | 0 | 45.09  | 37 |
| 1049.5254 | 2 | 1049.5254 | 0       | 521  | 529  | 0 | 62.97  | 37 |
| 1115.5824 | 2 | 1115.5822 | 0.0002  | 862  | 870  | 0 | 40.52  | 37 |
| 1157.6279 | 2 | 1157.6292 | -0.0013 | 200  | 209  | 0 | 59.93  | 37 |
| 1158.5867 | 2 | 1158.588  | -0.0013 | 506  | 516  | 0 | 81.15  | 37 |
| 1396.7296 | 2 | 1396.731  | -0.0014 | 236  | 248  | 0 | 58.46  | 36 |
| 1410.6442 | 2 | 1410.6416 | 0.0027  | 875  | 887  | 0 | 38.98  | 36 |
| 1475.776  | 2 | 1475.7773 | -0.0013 | 183  | 196  | 0 | 63.19  | 38 |

|           |   |           |         |     |     |   |        |    |
|-----------|---|-----------|---------|-----|-----|---|--------|----|
| 1511.7172 | 2 | 1511.7177 | -0.0005 | 275 | 287 | 0 | 64.64  | 36 |
| 1891.0401 | 2 | 1891.0415 | -0.0014 | 454 | 470 | 0 | 104.96 | 33 |
| 2251.0958 | 3 | 2250.0916 | 1.0041  | 481 | 500 | 0 | 93.7   | 37 |
| 2507.3749 | 3 | 2507.3748 | 0.0002  | 136 | 160 | 0 | 68.93  | 31 |
| 919.4779  | 2 | 919.4797  | -0.0018 | 43  | 52  | 0 | 69.39  | 38 |
| 940.502   | 2 | 940.5018  | 0.0002  | 63  | 70  | 0 | 37.03  | 34 |
| 1438.6788 | 2 | 1438.6801 | -0.0012 | 27  | 42  | 0 | 123.17 | 37 |
| 1514.7202 | 2 | 1514.7212 | -0.001  | 76  | 89  | 0 | 132.45 | 36 |
| 2141.0008 | 2 | 2141.0025 | -0.0016 | 71  | 89  | 1 | 103.97 | 37 |
| 913.5594  | 2 | 913.5597  | -0.0003 | 419 | 427 | 0 | 55.98  | 33 |
| 1006.5444 | 3 | 1006.5447 | -0.0003 | 165 | 172 | 1 | 42.4   | 36 |
| 1024.6019 | 2 | 1024.603  | -0.0011 | 244 | 254 | 0 | 75.45  | 31 |
| 1025.4814 | 2 | 1025.4818 | -0.0004 | 205 | 212 | 0 | 37.11  | 35 |
| 1119.5913 | 2 | 1119.5924 | -0.0011 | 21  | 30  | 0 | 47.24  | 37 |
| 1297.7394 | 2 | 1297.7394 | 0       | 135 | 146 | 0 | 82.36  | 33 |
| 1450.6648 | 2 | 1450.6663 | -0.0015 | 85  | 96  | 0 | 62.99  | 35 |
| 1633.8932 | 3 | 1633.894  | -0.0009 | 6   | 20  | 0 | 49.25  | 34 |
| 2311.1205 | 3 | 2311.1228 | -0.0023 | 392 | 411 | 1 | 62.42  | 37 |
| 2538.3137 | 3 | 2537.3121 | 1.0016  | 255 | 278 | 1 | 61.29  | 36 |
| 2972.4141 | 3 | 2972.4107 | 0.0034  | 101 | 129 | 0 | 77.05  | 37 |
| 942.5019  | 2 | 942.5022  | -0.0003 | 191 | 198 | 1 | 51     | 34 |
| 1069.6388 | 2 | 1069.6383 | 0.0005  | 83  | 92  | 0 | 56.5   | 31 |
| 1302.743  | 2 | 1302.7435 | -0.0005 | 136 | 146 | 0 | 63.19  | 33 |
| 1309.6126 | 2 | 1309.6125 | 0.0001  | 270 | 280 | 0 | 84.73  | 36 |
| 1379.6382 | 2 | 1379.6391 | -0.0009 | 290 | 302 | 0 | 62.46  | 37 |
| 1512.8302 | 3 | 1512.83   | 0.0002  | 204 | 216 | 0 | 71.87  | 35 |
| 1752.8501 | 2 | 1752.8505 | -0.0003 | 147 | 161 | 0 | 81.02  | 37 |
| 2320.2059 | 3 | 2320.2063 | -0.0004 | 93  | 113 | 0 | 80.45  | 36 |
| 1241.6425 | 2 | 1241.6438 | -0.0013 | 80  | 90  | 0 | 46.08  | 35 |
| 1934.0238 | 2 | 1934.0262 | -0.0023 | 180 | 197 | 0 | 114.67 | 36 |
| 2430.2294 | 2 | 2430.2319 | -0.0024 | 249 | 271 | 0 | 95.74  | 37 |
| 2483.216  | 2 | 2483.2166 | -0.0006 | 91  | 113 | 0 | 129.4  | 37 |
| 2945.4693 | 3 | 2945.4692 | 0.0001  | 219 | 245 | 0 | 70.51  | 36 |
| 960.412   | 2 | 960.4124  | -0.0003 | 544 | 552 | 0 | 52.32  | 29 |
| 1130.4633 | 2 | 1130.4629 | 0.0004  | 584 | 594 | 0 | 73.61  | 28 |
| 1158.4945 | 2 | 1158.4942 | 0.0003  | 602 | 613 | 0 | 36.48  | 31 |
| 1186.6952 | 2 | 1186.6962 | -0.001  | 155 | 165 | 0 | 45.77  | 33 |
| 1213.5355 | 2 | 1213.5397 | -0.0042 | 482 | 493 | 0 | 41.4   | 33 |
| 1260.6711 | 2 | 1260.6714 | -0.0003 | 471 | 481 | 0 | 39.08  | 38 |
| 1499.6779 | 2 | 1499.6787 | -0.0008 | 375 | 387 | 0 | 68.24  | 35 |
| 1545.7769 | 2 | 1545.7787 | -0.0019 | 222 | 236 | 0 | 101.89 | 38 |
| 1597.8213 | 3 | 1597.8213 | 0       | 396 | 410 | 0 | 40.04  | 36 |
| 1814.9044 | 2 | 1814.905  | -0.0007 | 319 | 335 | 0 | 70.33  | 37 |
| 2409.1276 | 2 | 2409.1304 | -0.0028 | 200 | 221 | 0 | 60.78  | 36 |
| 2583.3366 | 3 | 2583.3392 | -0.0026 | 92  | 117 | 1 | 45.38  | 35 |
| 815.4863  | 2 | 815.4865  | -0.0002 | 121 | 127 | 0 | 40.72  | 35 |
| 1173.6067 | 2 | 1173.607  | -0.0003 | 191 | 200 | 0 | 73.56  | 38 |
| 1478.772  | 2 | 1478.7729 | -0.0009 | 147 | 158 | 1 | 72.03  | 37 |
| 1514.708  | 2 | 1514.7101 | -0.0021 | 354 | 368 | 0 | 114.13 | 36 |
| 1725.7677 | 2 | 1725.7702 | -0.0025 | 219 | 233 | 0 | 59.35  | 34 |
| 1799.9293 | 2 | 1799.9305 | -0.0012 | 46  | 63  | 0 | 76.65  | 37 |
| 2157.0753 | 3 | 2156.0724 | 1.0029  | 129 | 146 | 1 | 37.7   | 37 |
| 770.4399  | 2 | 770.4399  | 0       | 346 | 353 | 0 | 57.81  | 32 |
| 916.5745  | 2 | 916.5746  | -0.0001 | 367 | 374 | 0 | 49.35  | 26 |
| 1206.6245 | 2 | 1206.6245 | 0.0001  | 354 | 366 | 0 | 61.4   | 38 |
| 1359.7053 | 2 | 1359.7068 | -0.0015 | 106 | 116 | 0 | 66.65  | 38 |
| 1445.7343 | 2 | 1445.7343 | 0       | 154 | 165 | 0 | 74.52  | 38 |
| 2047.0088 | 2 | 2047.0085 | 0.0004  | 76  | 95  | 0 | 102.66 | 37 |

|           |   |           |         |      |      |   |        |    |
|-----------|---|-----------|---------|------|------|---|--------|----|
| 937.486   | 2 | 937.4869  | -0.0009 | 631  | 640  | 0 | 48.28  | 36 |
| 1138.5716 | 2 | 1138.5731 | -0.0015 | 973  | 981  | 0 | 76.36  | 36 |
| 1172.6651 | 2 | 1172.6652 | -0.0001 | 922  | 931  | 0 | 42.21  | 36 |
| 1174.6455 | 2 | 1174.6458 | -0.0003 | 1035 | 1043 | 0 | 50.55  | 37 |
| 1314.6911 | 2 | 1314.6892 | 0.0019  | 1259 | 1271 | 0 | 66.21  | 37 |
| 1353.6517 | 2 | 1353.6525 | -0.0007 | 1401 | 1414 | 0 | 74.77  | 37 |
| 1872.8386 | 2 | 1872.8391 | -0.0005 | 582  | 597  | 0 | 70.95  | 34 |
| 1955.9668 | 3 | 1954.965  | 1.0019  | 982  | 997  | 0 | 46.29  | 37 |
| 1985.9366 | 2 | 1985.9371 | -0.0005 | 614  | 630  | 0 | 49.71  | 36 |
| 2166.9748 | 3 | 2166.9777 | -0.0029 | 535  | 553  | 0 | 73.37  | 34 |
| 2377.2182 | 3 | 2376.2107 | 1.0075  | 953  | 972  | 0 | 49.86  | 37 |
| 856.5128  | 2 | 856.513   | -0.0002 | 545  | 551  | 0 | 40.86  | 35 |
| 946.4974  | 2 | 946.4971  | 0.0003  | 295  | 303  | 0 | 45.05  | 39 |
| 1129.5614 | 2 | 1129.5615 | -0.0001 | 613  | 622  | 0 | 53.12  | 35 |
| 1189.6713 | 2 | 1189.6707 | 0.0006  | 398  | 408  | 0 | 58.93  | 35 |
| 1234.5678 | 2 | 1234.5677 | 0.0001  | 552  | 563  | 0 | 70.53  | 36 |
| 1255.6115 | 2 | 1255.6118 | -0.0003 | 178  | 188  | 1 | 54.59  | 36 |
| 1416.719  | 2 | 1416.7209 | -0.0019 | 112  | 125  | 0 | 61.34  | 37 |
| 1432.7232 | 2 | 1432.7232 | 0       | 382  | 394  | 0 | 93.27  | 38 |
| 1612.8682 | 3 | 1612.8685 | -0.0003 | 352  | 364  | 1 | 53.02  | 35 |
| 1820.9012 | 2 | 1820.9017 | -0.0005 | 472  | 488  | 0 | 97.98  | 38 |
| 1192.6557 | 2 | 1192.6564 | -0.0007 | 138  | 147  | 0 | 59.88  | 35 |
| 1216.5982 | 2 | 1216.5989 | -0.0007 | 321  | 330  | 0 | 53.25  | 37 |
| 1279.623  | 2 | 1279.6231 | -0.0001 | 207  | 217  | 0 | 77.84  | 37 |
| 1422.6561 | 2 | 1422.6568 | -0.0007 | 183  | 193  | 0 | 81.71  | 36 |
| 1482.8069 | 2 | 1482.8155 | -0.0086 | 102  | 116  | 0 | 88.63  | 34 |
| 1585.8675 | 2 | 1585.8684 | -0.0009 | 306  | 320  | 0 | 63.2   | 36 |
| 2275.1658 | 2 | 2275.1671 | -0.0012 | 118  | 137  | 0 | 45.2   | 37 |
| 2485.2061 | 3 | 2484.202  | 1.0041  | 148  | 170  | 0 | 52.16  | 37 |
| 1157.6435 | 2 | 1157.6445 | -0.0009 | 206  | 217  | 0 | 49.17  | 37 |
| 1166.5305 | 2 | 1166.5316 | -0.0011 | 279  | 288  | 1 | 57.5   | 35 |
| 1194.5514 | 2 | 1194.5517 | -0.0003 | 371  | 381  | 0 | 53.27  | 36 |
| 1294.6348 | 2 | 1294.634  | 0.0008  | 223  | 234  | 0 | 43.89  | 37 |
| 1885.893  | 2 | 1885.8945 | -0.0015 | 140  | 155  | 0 | 49.01  | 37 |
| 1982.9228 | 2 | 1982.9255 | -0.0028 | 293  | 309  | 0 | 145.13 | 36 |
| 1696.7567 | 2 | 1696.754  | 0.0027  | 73   | 87   | 0 | 92.27  | 34 |
| 2149.123  | 2 | 2149.1242 | -0.0011 | 278  | 296  | 0 | 125.42 | 36 |
| 2346.1796 | 3 | 2346.1815 | -0.0019 | 410  | 432  | 0 | 77.85  | 37 |
| 2822.4453 | 3 | 2822.4491 | -0.0038 | 325  | 349  | 1 | 63.6   | 36 |
| 869.5328  | 2 | 869.5334  | -0.0007 | 236  | 243  | 0 | 50.18  | 29 |
| 914.4818  | 2 | 914.4821  | -0.0003 | 389  | 396  | 0 | 40.85  | 35 |
| 1009.5921 | 2 | 1009.592  | 0.0001  | 417  | 425  | 0 | 35.96  | 29 |
| 1380.6499 | 2 | 1380.6521 | -0.0022 | 608  | 619  | 0 | 58.44  | 37 |
| 1460.7631 | 2 | 1460.7623 | 0.0008  | 185  | 197  | 0 | 107.5  | 38 |
| 1578.8038 | 2 | 1578.8042 | -0.0004 | 133  | 146  | 0 | 56.31  | 38 |
| 1750.8871 | 2 | 1750.889  | -0.0018 | 244  | 259  | 0 | 105.26 | 38 |
| 1847.999  | 3 | 1847.9993 | -0.0003 | 400  | 416  | 1 | 40.9   | 35 |
| 799.5279  | 2 | 799.528   | 0       | 64   | 70   | 1 | 31.2   | 28 |
| 975.4405  | 2 | 975.441   | -0.0005 | 21   | 30   | 0 | 76.81  | 33 |
| 1162.5897 | 2 | 1162.5903 | -0.0006 | 318  | 328  | 0 | 38.75  | 38 |
| 1197.6977 | 2 | 1197.6982 | -0.0005 | 31   | 41   | 1 | 63.23  | 33 |
| 1789.8838 | 2 | 1789.8846 | -0.0008 | 241  | 256  | 0 | 82.44  | 38 |
| 1968.0778 | 3 | 1967.0727 | 1.005   | 98   | 115  | 0 | 42.09  | 33 |
| 3150.6331 | 3 | 3150.635  | -0.0019 | 150  | 179  | 0 | 102.31 | 34 |
| 1155.5351 | 2 | 1155.5342 | 0.0008  | 224  | 233  | 0 | 41.24  | 35 |
| 1266.6027 | 2 | 1266.6026 | 0.0001  | 660  | 669  | 0 | 50.08  | 37 |
| 1335.6675 | 2 | 1335.667  | 0.0005  | 157  | 168  | 0 | 63.2   | 38 |
| 1402.8589 | 2 | 1402.8588 | 0.0002  | 562  | 574  | 0 | 83.62  | 20 |

|           |   |           |         |     |     |   |        |    |
|-----------|---|-----------|---------|-----|-----|---|--------|----|
| 1715.028  | 2 | 1715.0273 | 0.0007  | 869 | 883 | 0 | 56.1   | 22 |
| 2053.0382 | 2 | 2053.0401 | -0.0019 | 115 | 133 | 0 | 70.58  | 37 |
| 2111.0452 | 3 | 2111.0436 | 0.0016  | 368 | 387 | 0 | 50.24  | 37 |
| 982.4913  | 2 | 982.4906  | 0.0007  | 197 | 205 | 0 | 54.5   | 35 |
| 1194.5764 | 2 | 1194.5768 | -0.0004 | 112 | 121 | 0 | 53.67  | 37 |
| 1312.6272 | 2 | 1312.6299 | -0.0027 | 78  | 89  | 0 | 50.99  | 36 |
| 1464.7715 | 2 | 1464.7725 | -0.001  | 95  | 106 | 0 | 88.83  | 37 |
| 1608.7982 | 2 | 1608.7995 | -0.0013 | 216 | 231 | 0 | 86.32  | 38 |
| 1948.9156 | 2 | 1948.9162 | -0.0006 | 232 | 247 | 0 | 79.38  | 36 |
| 1018.5044 | 2 | 1018.5043 | 0       | 805 | 815 | 0 | 96.54  | 38 |
| 1282.6154 | 2 | 1282.6162 | -0.0008 | 543 | 553 | 0 | 61.19  | 36 |
| 1461.7622 | 2 | 1461.7616 | 0.0006  | 683 | 694 | 0 | 78.64  | 38 |
| 1835.9326 | 2 | 1835.9339 | -0.0012 | 112 | 127 | 0 | 110.72 | 38 |
| 1232.6173 | 2 | 1232.6183 | -0.001  | 623 | 633 | 0 | 49.79  | 38 |
| 1257.6958 | 2 | 1257.6969 | -0.0011 | 875 | 886 | 0 | 46.21  | 36 |
| 1276.6662 | 2 | 1276.6663 | -0.0001 | 318 | 330 | 0 | 43.8   | 37 |
| 1280.6176 | 2 | 1280.6183 | -0.0007 | 331 | 341 | 0 | 57.46  | 37 |
| 1554.8617 | 2 | 1554.8617 | 0       | 763 | 777 | 0 | 98.89  | 34 |
| 1558.7616 | 2 | 1558.7587 | 0.0029  | 474 | 488 | 0 | 87.85  | 37 |
| 1287.6603 | 2 | 1287.6605 | -0.0002 | 95  | 106 | 0 | 66.08  | 38 |
| 1422.6549 | 2 | 1422.6627 | -0.0078 | 28  | 40  | 0 | 71.89  | 36 |
| 1941.9831 | 2 | 1941.9836 | -0.0005 | 11  | 27  | 0 | 119.16 | 37 |
| 1212.6713 | 2 | 1212.6714 | -0.0001 | 296 | 306 | 0 | 98.76  | 35 |
| 1587.7841 | 2 | 1587.7852 | -0.0011 | 228 | 243 | 0 | 92.23  | 37 |
| 1767.7799 | 3 | 1767.7787 | 0.0011  | 131 | 145 | 0 | 50.62  | 34 |
| 2128.0662 | 2 | 2128.0609 | 0.0053  | 193 | 210 | 0 | 58.7   | 37 |
| 1180.7187 | 2 | 1180.718  | 0.0008  | 174 | 184 | 0 | 80.93  | 26 |
| 1232.6881 | 2 | 1232.6877 | 0.0004  | 397 | 408 | 0 | 70.8   | 36 |
| 1881.0971 | 2 | 1881.0975 | -0.0004 | 147 | 164 | 0 | 103.88 | 27 |
| 1159.5815 | 2 | 1159.5833 | -0.0018 | 513 | 524 | 0 | 41.52  | 38 |
| 1198.6563 | 2 | 1198.6557 | 0.0005  | 286 | 296 | 0 | 67.09  | 35 |
| 1279.7599 | 2 | 1279.7612 | -0.0013 | 161 | 173 | 0 | 69.32  | 28 |
| 1699.891  | 2 | 1699.8927 | -0.0017 | 459 | 475 | 0 | 108.19 | 37 |
| 1899.0282 | 2 | 1899.0313 | -0.0031 | 426 | 444 | 0 | 60.42  | 35 |
| 1192.6557 | 2 | 1192.6564 | -0.0007 | 138 | 147 | 0 | 59.88  | 35 |
| 1216.5982 | 2 | 1216.5989 | -0.0007 | 321 | 330 | 0 | 53.25  | 37 |
| 1422.6561 | 2 | 1422.6568 | -0.0007 | 183 | 193 | 0 | 81.71  | 36 |
| 1468.7989 | 2 | 1468.7998 | -0.0009 | 102 | 116 | 0 | 83.43  | 35 |
| 2485.2061 | 3 | 2484.202  | 1.0041  | 148 | 170 | 0 | 52.16  | 37 |
| 1746.8883 | 2 | 1746.89   | -0.0017 | 32  | 48  | 0 | 138.86 | 38 |
| 1913.9578 | 2 | 1913.9597 | -0.0019 | 181 | 196 | 0 | 59.95  | 37 |
| 2460.2726 | 2 | 2460.2723 | 0.0004  | 6   | 26  | 0 | 66.8   | 36 |
| 997.5556  | 2 | 997.5556  | 0       | 140 | 148 | 0 | 44.7   | 33 |
| 1192.6101 | 3 | 1192.6102 | 0       | 48  | 58  | 0 | 49.49  | 38 |
| 1402.7931 | 2 | 1402.7932 | -0.0001 | 150 | 162 | 0 | 95.84  | 34 |
| 1630.8227 | 2 | 1630.8236 | -0.0009 | 171 | 185 | 0 | 112.56 | 38 |
| 939.5754  | 2 | 939.5753  | 0.0001  | 125 | 132 | 0 | 60.75  | 28 |
| 1864.0405 | 2 | 1864.0418 | -0.0013 | 68  | 84  | 0 | 124.75 | 31 |
| 2080.9256 | 3 | 2080.9273 | -0.0017 | 107 | 124 | 0 | 41.36  | 34 |
| 2192.0212 | 2 | 2192.0242 | -0.0029 | 140 | 159 | 0 | 60.28  | 36 |
| 1159.5815 | 2 | 1159.5833 | -0.0018 | 509 | 520 | 0 | 41.52  | 38 |
| 1228.6912 | 2 | 1228.6914 | -0.0002 | 282 | 292 | 0 | 56.66  | 36 |
| 1279.7599 | 2 | 1279.7612 | -0.0013 | 157 | 169 | 0 | 69.32  | 28 |
| 1699.891  | 2 | 1699.8927 | -0.0017 | 455 | 471 | 0 | 108.19 | 37 |
| 1899.0282 | 2 | 1899.0313 | -0.0031 | 422 | 440 | 0 | 60.42  | 35 |
| 1451.683  | 2 | 1451.6834 | -0.0004 | 244 | 255 | 0 | 57.99  | 37 |
| 1517.6633 | 2 | 1517.6668 | -0.0035 | 593 | 606 | 0 | 99.8   | 32 |
| 1798.9241 | 2 | 1798.9254 | -0.0013 | 771 | 786 | 0 | 56.78  | 37 |

|           |   |           |         |      |      |   |        |    |
|-----------|---|-----------|---------|------|------|---|--------|----|
| 2256.1944 | 2 | 2256.1961 | -0.0017 | 33   | 55   | 0 | 76.42  | 35 |
| 1158.4945 | 2 | 1158.4942 | 0.0003  | 596  | 607  | 0 | 36.48  | 31 |
| 1186.6952 | 2 | 1186.6962 | -0.001  | 167  | 177  | 0 | 45.77  | 33 |
| 1273.666  | 2 | 1273.6666 | -0.0006 | 483  | 493  | 0 | 43.44  | 38 |
| 1483.6836 | 3 | 1483.6838 | -0.0002 | 387  | 399  | 0 | 48.11  | 36 |
| 1536.8342 | 3 | 1536.8372 | -0.003  | 457  | 470  | 1 | 45.3   | 35 |
| 1795.7386 | 2 | 1795.7398 | -0.0012 | 569  | 588  | 0 | 96.33  | 28 |
| 2409.1276 | 2 | 2409.1304 | -0.0028 | 212  | 233  | 0 | 60.78  | 36 |
| 1495.8297 | 2 | 1495.8286 | 0.0011  | 705  | 717  | 0 | 96.18  | 32 |
| 1543.783  | 2 | 1543.7842 | -0.0012 | 1120 | 1133 | 0 | 79.94  | 37 |
| 1617.8425 | 2 | 1617.8403 | 0.0023  | 992  | 1006 | 0 | 54.88  | 37 |
| 1912.1393 | 2 | 1912.1397 | -0.0004 | 1025 | 1041 | 0 | 55.29  | 22 |
| 1236.6453 | 2 | 1236.6462 | -0.001  | 241  | 252  | 0 | 65.44  | 37 |
| 1750.8566 | 2 | 1750.856  | 0.0006  | 311  | 325  | 0 | 126.69 | 37 |
| 1300.6441 | 2 | 1300.6445 | -0.0004 | 97   | 108  | 0 | 61.88  | 36 |
| 1542.8294 | 3 | 1542.8307 | -0.0013 | 186  | 198  | 0 | 39.46  | 37 |
| 2044.0952 | 2 | 2044.0953 | 0       | 707  | 724  | 0 | 117.29 | 35 |
| 770.4399  | 2 | 770.4399  | 0       | 350  | 357  | 0 | 57.81  | 32 |
| 916.5745  | 2 | 916.5746  | -0.0001 | 371  | 378  | 0 | 49.35  | 26 |
| 950.4815  | 2 | 950.4821  | -0.0006 | 246  | 254  | 0 | 50.78  | 38 |
| 1227.6136 | 2 | 1227.6136 | 0       | 330  | 340  | 0 | 56.3   | 36 |
| 1359.7053 | 2 | 1359.7068 | -0.0015 | 110  | 120  | 0 | 66.65  | 38 |
| 1445.7343 | 2 | 1445.7343 | 0       | 158  | 169  | 0 | 74.52  | 38 |
| 897.4917  | 2 | 897.492   | -0.0003 | 24   | 31   | 0 | 52.01  | 33 |
| 1169.5964 | 2 | 1169.5968 | -0.0004 | 178  | 187  | 0 | 52.22  | 35 |
| 1581.8462 | 2 | 1581.8475 | -0.0013 | 75   | 89   | 0 | 63.94  | 35 |
| 1791.8932 | 3 | 1791.8944 | -0.0013 | 97   | 113  | 0 | 46.38  | 38 |
| 1864.9336 | 2 | 1864.934  | -0.0004 | 3    | 19   | 0 | 103.35 | 37 |
| 709.3872  | 2 | 709.3871  | 0.0001  | 171  | 176  | 0 | 38.56  | 32 |
| 884.4714  | 2 | 884.4716  | -0.0001 | 237  | 245  | 0 | 36.92  | 34 |
| 1277.618  | 2 | 1277.6187 | -0.0006 | 348  | 358  | 0 | 76.06  | 38 |
| 2201.0918 | 2 | 2201.0892 | 0.0026  | 314  | 332  | 0 | 91.18  | 37 |
| 3372.5701 | 3 | 3372.5721 | -0.0021 | 193  | 222  | 0 | 66.42  | 35 |
| 1424.7668 | 2 | 1424.7664 | 0.0004  | 309  | 321  | 0 | 73.35  | 35 |
| 1491.7665 | 2 | 1491.7681 | -0.0017 | 338  | 351  | 0 | 110.68 | 38 |
| 1863.9366 | 2 | 1863.9367 | 0       | 322  | 337  | 0 | 71.31  | 38 |
| 1025.5875 | 2 | 1025.5869 | 0.0006  | 424  | 433  | 0 | 32.62  | 32 |
| 1249.6302 | 2 | 1249.6302 | 0       | 277  | 287  | 0 | 61.83  | 38 |
| 2307.1472 | 2 | 2307.1495 | -0.0023 | 672  | 693  | 0 | 150.51 | 38 |
| 1770.0259 | 2 | 1770.0251 | 0.0008  | 296  | 312  | 0 | 105.45 | 28 |
| 1924.0191 | 2 | 1924.0193 | -0.0002 | 221  | 236  | 0 | 98.37  | 35 |
| 1038.6081 | 2 | 1038.6073 | 0.0008  | 64   | 72   | 0 | 38.14  | 29 |
| 1247.6256 | 2 | 1247.6258 | -0.0003 | 73   | 83   | 0 | 47.46  | 39 |
| 1322.6568 | 2 | 1322.6605 | -0.0038 | 429  | 439  | 0 | 66.36  | 38 |
| 2319.1918 | 2 | 2319.1933 | -0.0014 | 245  | 265  | 0 | 37.12  | 36 |
| 2652.3997 | 3 | 2651.3919 | 1.0078  | 319  | 341  | 0 | 99.23  | 34 |
| 1419.7724 | 2 | 1419.7722 | 0.0003  | 2674 | 2686 | 0 | 85.11  | 36 |
| 1540.8404 | 2 | 1540.8395 | 0.0009  | 4372 | 4384 | 0 | 43.08  | 34 |
| 1618.8927 | 2 | 1618.893  | -0.0004 | 3071 | 3085 | 0 | 79.99  | 34 |
| 2053.0036 | 2 | 2053.0019 | 0.0017  | 5353 | 5368 | 0 | 38.59  | 38 |
| 2790.3814 | 3 | 2790.3824 | -0.001  | 2150 | 2173 | 0 | 37.56  | 37 |
| 977.5178  | 2 | 977.5182  | -0.0004 | 37   | 44   | 0 | 54.88  | 37 |
| 1530.7175 | 2 | 1530.7161 | 0.0014  | 86   | 99   | 0 | 129.48 | 36 |
| 3108.5146 | 3 | 3107.5155 | 0.9991  | 45   | 72   | 0 | 50.54  | 37 |
| 999.5698  | 2 | 999.5713  | -0.0015 | 268  | 276  | 0 | 46.79  | 36 |
| 1270.6985 | 2 | 1270.6993 | -0.0008 | 93   | 104  | 0 | 66.9   | 36 |
| 1284.7111 | 2 | 1284.7112 | -0.0001 | 177  | 188  | 0 | 49.89  | 35 |
| 1397.6681 | 3 | 1397.6688 | -0.0007 | 165  | 176  | 0 | 43.86  | 36 |

|           |   |           |         |      |      |   |        |    |
|-----------|---|-----------|---------|------|------|---|--------|----|
| 1414.7559 | 2 | 1414.7569 | -0.0009 | 254  | 267  | 0 | 97.59  | 37 |
| 1559.804  | 2 | 1559.8042 | -0.0002 | 124  | 138  | 0 | 102.96 | 38 |
| 2375.1078 | 2 | 2375.107  | 0.0008  | 139  | 160  | 0 | 96.19  | 36 |
| 1157.6435 | 2 | 1157.6445 | -0.0009 | 175  | 186  | 0 | 49.17  | 37 |
| 1161.579  | 2 | 1161.5778 | 0.0012  | 340  | 350  | 0 | 74.65  | 38 |
| 1275.6834 | 2 | 1275.6823 | 0.0011  | 192  | 203  | 0 | 51.1   | 37 |
| 1397.6414 | 2 | 1397.6431 | -0.0018 | 351  | 362  | 0 | 49.48  | 35 |
| 2222.2021 | 3 | 2222.2019 | 0.0003  | 55   | 74   | 1 | 76.47  | 33 |
| 1048.5194 | 2 | 1048.5189 | 0.0005  | 314  | 322  | 0 | 43.18  | 38 |
| 1173.6273 | 2 | 1173.6354 | -0.0081 | 379  | 389  | 0 | 67.37  | 38 |
| 1225.7027 | 2 | 1225.703  | -0.0003 | 469  | 480  | 0 | 63.72  | 32 |
| 1367.6208 | 2 | 1367.6214 | -0.0005 | 323  | 333  | 0 | 40.64  | 35 |
| 1752.9556 | 2 | 1752.9563 | -0.0007 | 363  | 378  | 0 | 73.53  | 33 |
| 1410.8332 | 2 | 1410.8334 | -0.0002 | 152  | 164  | 0 | 59.05  | 30 |
| 2989.6577 | 3 | 2989.66   | -0.0023 | 67   | 94   | 0 | 50.99  | 28 |
| 3173.6371 | 3 | 3173.6391 | -0.002  | 17   | 44   | 0 | 71.09  | 34 |
| 3549.9073 | 3 | 3549.9083 | -0.0011 | 115  | 148  | 0 | 43.26  | 30 |
| 1560.7162 | 2 | 1560.7168 | -0.0006 | 168  | 181  | 0 | 46.06  | 35 |
| 1656.7359 | 2 | 1656.738  | -0.002  | 61   | 75   | 0 | 58.08  | 34 |
| 1703.8829 | 2 | 1703.8842 | -0.0014 | 79   | 93   | 0 | 113.52 | 38 |
| 1188.6346 | 2 | 1188.635  | -0.0004 | 182  | 194  | 0 | 105.78 | 38 |
| 1351.6351 | 2 | 1351.6368 | -0.0017 | 331  | 342  | 0 | 70.38  | 37 |
| 1822.9434 | 2 | 1822.9465 | -0.0031 | 43   | 59   | 0 | 50.81  | 37 |
| 1361.7381 | 2 | 1361.7377 | 0.0004  | 1194 | 1205 | 0 | 61.81  | 36 |
| 1760.9491 | 2 | 1760.9495 | -0.0004 | 1939 | 1953 | 0 | 38.87  | 35 |
| 2048.0976 | 2 | 2048.0983 | -0.0006 | 957  | 974  | 0 | 73.54  | 35 |
| 2193.2256 | 2 | 2193.2256 | 0       | 440  | 459  | 0 | 40.76  | 30 |
| 2239.1672 | 3 | 2239.1696 | -0.0024 | 2495 | 2515 | 0 | 50.05  | 36 |
| 713.4434  | 2 | 713.4435  | -0.0001 | 430  | 435  | 0 | 31.76  | 30 |
| 1255.6882 | 2 | 1255.6884 | -0.0002 | 88   | 99   | 0 | 58.77  | 35 |
| 1290.6351 | 2 | 1290.6303 | 0.0048  | 34   | 45   | 0 | 51.61  | 38 |
| 1526.7921 | 2 | 1526.794  | -0.0019 | 358  | 371  | 0 | 84.63  | 36 |
| 1582.7832 | 3 | 1582.7839 | -0.0006 | 441  | 454  | 1 | 57.32  | 37 |
| 989.5546  | 2 | 989.5546  | 0       | 693  | 700  | 0 | 55.33  | 36 |
| 1041.4869 | 2 | 1041.488  | -0.001  | 364  | 372  | 0 | 37.09  | 34 |
| 1255.6446 | 2 | 1255.6448 | -0.0002 | 589  | 598  | 0 | 68.2   | 35 |
| 1664.8422 | 2 | 1664.841  | 0.0013  | 677  | 692  | 0 | 85.21  | 37 |
| 794.4285  | 2 | 794.4286  | -0.0001 | 263  | 269  | 0 | 46.29  | 34 |
| 936.5505  | 2 | 936.5505  | 0       | 162  | 169  | 0 | 45.48  | 30 |
| 982.5333  | 2 | 982.5349  | -0.0015 | 11   | 19   | 0 | 41.29  | 34 |
| 1032.5572 | 2 | 1032.5564 | 0.0008  | 344  | 352  | 0 | 50.1   | 37 |
| 1251.5808 | 2 | 1251.5812 | -0.0004 | 195  | 204  | 0 | 44.29  | 36 |
| 1319.662  | 2 | 1319.6622 | -0.0002 | 362  | 373  | 0 | 69.04  | 38 |
| 1595.6885 | 3 | 1595.6886 | -0.0001 | 291  | 304  | 0 | 43.19  | 33 |
| 815.4862  | 2 | 815.4865  | -0.0003 | 105  | 111  | 0 | 39.52  | 35 |
| 1157.6435 | 2 | 1157.6445 | -0.0009 | 191  | 202  | 0 | 49.17  | 37 |
| 2012.9743 | 3 | 2012.9771 | -0.0028 | 360  | 378  | 0 | 47.79  | 37 |
| 2028.0542 | 2 | 2028.0527 | 0.0015  | 246  | 264  | 0 | 58.87  | 36 |
| 1378.7086 | 2 | 1378.7092 | -0.0006 | 376  | 389  | 0 | 97.71  | 38 |
| 2156.9906 | 2 | 2156.9862 | 0.0044  | 356  | 375  | 0 | 78.23  | 36 |
| 1425.7531 | 2 | 1425.7576 | -0.0045 | 132  | 144  | 0 | 65.87  | 36 |
| 1759.8941 | 2 | 1759.8952 | -0.0011 | 9    | 25   | 0 | 108.12 | 37 |
| 948.5381  | 2 | 948.5392  | -0.0012 | 197  | 205  | 0 | 67.18  | 35 |
| 1218.6491 | 2 | 1218.6496 | -0.0004 | 112  | 121  | 0 | 53.71  | 37 |
| 1407.7507 | 2 | 1407.7511 | -0.0004 | 95   | 106  | 0 | 90.7   | 36 |
| 1196.5819 | 2 | 1196.5826 | -0.0007 | 138  | 148  | 0 | 74.01  | 36 |
| 1534.7214 | 2 | 1534.7223 | -0.0009 | 469  | 483  | 0 | 101.27 | 37 |
| 1729.8299 | 2 | 1729.8271 | 0.0028  | 517  | 532  | 0 | 63.95  | 37 |

|           |   |           |         |      |      |   |        |    |
|-----------|---|-----------|---------|------|------|---|--------|----|
| 2165.0919 | 3 | 2165.0926 | -0.0007 | 427  | 446  | 0 | 42.67  | 37 |
| 2641.3365 | 3 | 2641.3347 | 0.0017  | 131  | 154  | 0 | 65.01  | 37 |
| 904.4432  | 2 | 904.4436  | -0.0004 | 290  | 297  | 0 | 49.35  | 37 |
| 1033.522  | 2 | 1033.5226 | -0.0006 | 344  | 352  | 0 | 55.05  | 39 |
| 1443.6504 | 3 | 1443.6491 | 0.0013  | 63   | 76   | 0 | 41.2   | 34 |
| 1928.7969 | 2 | 1928.7986 | -0.0017 | 385  | 400  | 0 | 86.1   | 29 |
| 1212.5545 | 2 | 1212.5557 | -0.0012 | 153  | 162  | 0 | 70.86  | 35 |
| 1618.8839 | 2 | 1618.8831 | 0.0008  | 200  | 213  | 0 | 80.97  | 35 |
| 2056.9606 | 2 | 2056.9623 | -0.0016 | 244  | 262  | 1 | 46.01  | 36 |
| 1038.5773 | 2 | 1038.5783 | -0.001  | 26   | 34   | 0 | 40.26  | 33 |
| 1059.5503 | 2 | 1059.5502 | 0.0001  | 79   | 86   | 0 | 39.6   | 38 |
| 2100.0506 | 2 | 2100.0521 | -0.0014 | 56   | 75   | 0 | 94.49  | 37 |
| 992.5467  | 2 | 992.5477  | -0.001  | 319  | 327  | 0 | 59.44  | 36 |
| 1576.7844 | 2 | 1576.7847 | -0.0003 | 248  | 260  | 0 | 87.81  | 38 |
| 1014.5333 | 2 | 1014.5346 | -0.0013 | 998  | 1007 | 0 | 43.9   | 35 |
| 1434.7342 | 2 | 1434.7354 | -0.0012 | 1132 | 1144 | 0 | 85.84  | 38 |
| 2039.1092 | 2 | 2039.1092 | 0.0001  | 520  | 536  | 0 | 42.9   | 34 |
| 2660.4327 | 3 | 2660.4326 | 0       | 414  | 437  | 0 | 44.15  | 32 |
| 1264.5776 | 2 | 1264.5791 | -0.0015 | 174  | 184  | 0 | 38.02  | 36 |
| 1944.032  | 2 | 1944.0316 | 0.0004  | 2070 | 2087 | 0 | 114.71 | 36 |
| 1180.692  | 2 | 1180.6928 | -0.0007 | 129  | 139  | 0 | 65.64  | 30 |
| 1549.7548 | 2 | 1549.7559 | -0.001  | 115  | 128  | 0 | 87.69  | 38 |
| 1157.6435 | 2 | 1157.6445 | -0.0009 | 197  | 208  | 0 | 49.17  | 37 |
| 1478.8566 | 3 | 1478.8569 | -0.0003 | 311  | 323  | 1 | 34.82  | 30 |
| 1937.9356 | 2 | 1937.9404 | -0.0048 | 285  | 301  | 0 | 92.36  | 37 |
| 2086.9971 | 3 | 2086.9993 | -0.0022 | 252  | 270  | 0 | 39.81  | 37 |
| 1088.6229 | 2 | 1088.623  | -0.0001 | 118  | 127  | 0 | 62.92  | 34 |
| 1102.6053 | 2 | 1102.6056 | -0.0003 | 20   | 30   | 0 | 51.97  | 38 |
| 2106.0856 | 3 | 2105.0827 | 1.0029  | 110  | 127  | 1 | 68.74  | 37 |
| 1256.7324 | 2 | 1256.734  | -0.0016 | 84   | 95   | 0 | 88.51  | 33 |
| 1383.7036 | 2 | 1383.7034 | 0.0002  | 26   | 37   | 0 | 56.71  | 36 |
| 1259.676  | 2 | 1259.6761 | -0.0001 | 468  | 478  | 0 | 59.44  | 37 |
| 1329.707  | 2 | 1329.7075 | -0.0004 | 234  | 246  | 0 | 91.73  | 38 |
| 980.5109  | 2 | 980.5113  | -0.0005 | 67   | 74   | 0 | 49.91  | 35 |
| 1357.7191 | 2 | 1357.7201 | -0.001  | 19   | 31   | 0 | 53.49  | 38 |
| 1531.8227 | 2 | 1531.8246 | -0.0019 | 38   | 51   | 0 | 74.5   | 37 |
| 1448.7005 | 3 | 1448.7008 | -0.0003 | 221  | 233  | 0 | 47.41  | 38 |
| 2127.0212 | 2 | 2126.0168 | 1.0045  | 17   | 36   | 0 | 90.28  | 37 |
| 1340.7565 | 2 | 1340.7565 | 0.0001  | 511  | 523  | 0 | 76.49  | 34 |
| 1630.8684 | 2 | 1630.8679 | 0.0005  | 227  | 242  | 0 | 61.55  | 36 |
| 1673.8921 | 3 | 1673.893  | -0.0009 | 21   | 33   | 0 | 52.19  | 37 |
| 2480.328  | 3 | 2480.3274 | 0.0006  | 88   | 110  | 0 | 66.37  | 33 |
| 1266.5685 | 2 | 1266.5696 | -0.0012 | 136  | 147  | 0 | 56.87  | 35 |
| 2499.3674 | 2 | 2499.3684 | -0.0009 | 533  | 557  | 0 | 71.14  | 31 |
| 1154.6399 | 2 | 1154.6408 | -0.0008 | 192  | 203  | 0 | 55.89  | 33 |
| 1255.6115 | 2 | 1255.6118 | -0.0003 | 159  | 169  | 1 | 54.59  | 36 |
| 1493.7148 | 2 | 1493.7151 | -0.0002 | 68   | 80   | 0 | 60.56  | 37 |
| 961.5229  | 2 | 961.5233  | -0.0004 | 322  | 329  | 0 | 71.37  | 38 |
| 1422.6083 | 3 | 1422.6099 | -0.0016 | 231  | 241  | 0 | 42.36  | 31 |
| 2390.2337 | 3 | 2389.2278 | 1.0059  | 61   | 83   | 0 | 53.83  | 36 |
| 905.4974  | 2 | 905.4971  | 0.0003  | 522  | 529  | 0 | 40.9   | 37 |
| 1703.9814 | 2 | 1703.9821 | -0.0007 | 322  | 336  | 0 | 94.98  | 29 |
| 764.4179  | 2 | 764.4181  | -0.0002 | 281  | 287  | 0 | 36.59  | 34 |
| 1205.5994 | 2 | 1205.604  | -0.0046 | 61   | 70   | 0 | 53     | 38 |
| 1452.7466 | 2 | 1452.7474 | -0.0008 | 238  | 252  | 0 | 81.92  | 37 |
| 1159.6196 | 2 | 1159.6197 | -0.0001 | 50   | 61   | 0 | 74.53  | 38 |
| 1165.5967 | 2 | 1165.5979 | -0.0012 | 66   | 76   | 0 | 64.6   | 37 |
| 1089.566  | 2 | 1089.5666 | -0.0006 | 172  | 181  | 0 | 53.67  | 39 |

|           |   |           |         |     |     |   |       |    |
|-----------|---|-----------|---------|-----|-----|---|-------|----|
| 1705.7753 | 3 | 1705.7768 | -0.0016 | 493 | 507 | 0 | 81.45 | 35 |
| 747.4281  | 2 | 747.4279  | 0.0002  | 363 | 368 | 0 | 40.87 | 36 |
| 1736.8393 | 2 | 1736.8403 | -0.001  | 291 | 305 | 0 | 95.45 | 37 |
| 1165.5985 | 2 | 1165.5979 | 0.0006  | 40  | 50  | 0 | 90.86 | 37 |
| 3196.6105 | 3 | 3196.6099 | 0.0006  | 236 | 265 | 0 | 42.89 | 36 |
| 943.534   | 2 | 943.5338  | 0.0002  | 246 | 253 | 0 | 42.7  | 37 |
| 1224.7257 | 2 | 1224.7264 | -0.0007 | 40  | 49  | 0 | 31.56 | 31 |
| 1365.6704 | 2 | 1365.6711 | -0.0008 | 175 | 187 | 0 | 74.8  | 38 |
| 1467.8591 | 3 | 1467.8595 | -0.0004 | 38  | 49  | 1 | 43.95 | 29 |
| 1180.5724 | 2 | 1180.5724 | 0       | 410 | 420 | 0 | 75.26 | 37 |
| 1287.7074 | 2 | 1287.7074 | 0       | 437 | 447 | 0 | 50.59 | 37 |
| 1535.9537 | 2 | 1535.9538 | -0.0001 | 559 | 572 | 0 | 35.12 | 20 |
| 922.4984  | 2 | 922.4984  | 0       | 204 | 211 | 0 | 41.61 | 35 |
| 1518.7834 | 2 | 1518.7831 | 0.0004  | 240 | 252 | 0 | 90.47 | 38 |
| 956.5538  | 2 | 956.5542  | -0.0005 | 126 | 133 | 0 | 38.17 | 34 |
| 1144.5901 | 2 | 1144.591  | -0.0009 | 134 | 142 | 0 | 58.46 | 37 |
| 2882.4284 | 2 | 2882.4284 | 0       | 94  | 120 | 0 | 66.03 | 37 |
| 1003.5815 | 2 | 1003.5814 | 0.0001  | 471 | 479 | 0 | 62.2  | 34 |
| 1880.9336 | 2 | 1880.9342 | -0.0006 | 445 | 460 | 0 | 64.25 | 37 |
| 1682.9451 | 2 | 1682.9454 | -0.0003 | 133 | 147 | 0 | 80.64 | 32 |
| 2322.2789 | 3 | 2322.2795 | -0.0006 | 133 | 153 | 1 | 42.83 | 31 |
| 1176.6134 | 2 | 1176.6139 | -0.0005 | 812 | 821 | 0 | 63.01 | 38 |
| 1483.9014 | 2 | 1483.9014 | 0       | 433 | 446 | 0 | 47.38 | 25 |
| 1857.9285 | 3 | 1857.9295 | -0.001  | 540 | 555 | 0 | 42.59 | 37 |
| 939.5393  | 2 | 939.5389  | 0.0004  | 286 | 293 | 0 | 37    | 30 |
| 1267.604  | 2 | 1267.6044 | -0.0005 | 51  | 61  | 0 | 49.11 | 37 |
| 1308.7432 | 2 | 1308.7442 | -0.001  | 146 | 157 | 0 | 57.98 | 32 |
| 1948.8583 | 2 | 1948.8578 | 0.0005  | 396 | 411 | 0 | 34.04 | 33 |
| 1294.8336 | 2 | 1294.8336 | 0       | 618 | 629 | 0 | 73.12 | 20 |
| 1942.0889 | 3 | 1942.0887 | 0.0001  | 225 | 241 | 1 | 40.87 | 32 |
| 1056.6295 | 2 | 1056.6292 | 0.0003  | 57  | 67  | 0 | 78.46 | 34 |
| 1253.687  | 2 | 1253.688  | -0.001  | 174 | 185 | 0 | 40.08 | 34 |
| 1239.6241 | 2 | 1239.6248 | -0.0006 | 206 | 215 | 0 | 66.89 | 37 |
| 1943.9794 | 2 | 1943.9808 | -0.0014 | 292 | 310 | 0 | 45.53 | 37 |
| 949.5224  | 2 | 949.5233  | -0.0009 | 406 | 413 | 0 | 38.72 | 35 |
| 1547.8809 | 2 | 1547.881  | -0.0002 | 139 | 152 | 0 | 68.52 | 31 |
| 1960.9664 | 3 | 1960.9676 | -0.0013 | 318 | 333 | 0 | 39.34 | 38 |
| 1067.4954 | 2 | 1067.4957 | -0.0004 | 112 | 120 | 0 | 43.63 | 35 |
| 2851.4931 | 3 | 2851.4967 | -0.0037 | 227 | 253 | 0 | 69.1  | 34 |
| 1064.5907 | 2 | 1064.5906 | 0.0001  | 15  | 23  | 0 | 55.16 | 34 |
| 3020.2783 | 3 | 3020.2785 | -0.0002 | 81  | 111 | 0 | 51.79 | 30 |
| 1042.5549 | 2 | 1042.556  | -0.001  | 668 | 676 | 0 | 45.27 | 35 |
| 1340.6612 | 2 | 1340.6612 | 0       | 164 | 174 | 0 | 67.22 | 36 |
| 1368.6231 | 2 | 1368.6245 | -0.0013 | 220 | 230 | 0 | 38.8  | 35 |
| 1613.9063 | 2 | 1613.9062 | 0.0001  | 428 | 441 | 0 | 67.66 | 33 |
| 1064.5907 | 2 | 1064.5906 | 0.0001  | 15  | 23  | 0 | 55.16 | 34 |
| 1323.6898 | 2 | 1323.6922 | -0.0024 | 128 | 139 | 0 | 52.77 | 36 |
| 1194.6386 | 2 | 1194.6397 | -0.0011 | 302 | 312 | 0 | 41.36 | 35 |
| 1855.0551 | 2 | 1854.0502 | 1.0049  | 437 | 453 | 0 | 46.77 | 30 |
| 3201.6493 | 3 | 3201.6517 | -0.0025 | 405 | 436 | 0 | 44.54 | 35 |
| 1145.603  | 2 | 1145.604  | -0.0011 | 50  | 61  | 0 | 47.81 | 38 |
| 1165.5967 | 2 | 1165.5979 | -0.0012 | 66  | 76  | 0 | 64.6  | 37 |
| 1053.5583 | 2 | 1053.5567 | 0.0016  | 106 | 116 | 0 | 57.58 | 35 |
| 1442.7242 | 2 | 1442.7253 | -0.0011 | 128 | 140 | 0 | 49.17 | 37 |
| 754.5063  | 2 | 754.5065  | -0.0002 | 102 | 107 | 0 | 46.55 | 20 |
| 773.5165  | 2 | 773.5163  | 0.0002  | 83  | 88  | 0 | 41.74 | 22 |
| 1382.6868 | 2 | 1382.6864 | 0.0004  | 628 | 640 | 0 | 54.77 | 37 |
| 2217.2995 | 3 | 2216.3031 | 0.9964  | 378 | 398 | 0 | 39.52 | 24 |

|            |           |             |           |           |         |          |           |           |
|------------|-----------|-------------|-----------|-----------|---------|----------|-----------|-----------|
| 822.439    | 2         | 822.4388    | 0.0002    | 730       | 736     | 0        | 42.16     | 36        |
| 1649.9963  | 2         | 1649.9967   | -0.0004   | 21        | 35      | 0        | 49.6      | 22        |
| 1031.6124  | 2         | 1031.6128   | -0.0004   | 482       | 490     | 0        | 38.75     | 32        |
| 1533.855   | 2         | 1533.8555   | -0.0005   | 542       | 554     | 0        | 50.88     | 34        |
| 1071.6435  | 2         | 1071.6441   | -0.0005   | 934       | 943     | 0        | 48.02     | 34        |
| 1612.8563  | 3         | 1612.8573   | -0.001    | 646       | 659     | 0        | 39.52     | 36        |
| 1012.5667  | 2         | 1012.5665   | 0.0002    | 761       | 770     | 0        | 48.93     | 33        |
| 1703.9142  | 2         | 1703.9128   | 0.0015    | 549       | 564     | 0        | 38.49     | 36        |
| 1292.6615  | 2         | 1292.6612   | 0.0003    | 247       | 257     | 0        | 44.04     | 38        |
| 1367.6208  | 2         | 1367.6214   | -0.0006   | 258       | 268     | 0        | 40.64     | 35        |
| 1132.5077  | 2         | 1132.5084   | -0.0007   | 300       | 309     | 0        | 35        | 33        |
| 1239.6824  | 2         | 1239.6823   | 0.0001    | 203       | 213     | 0        | 44.19     | 34        |
| 949.5223   | 2         | 949.5233    | -0.001    | 92        | 99      | 0        | 39.87     | 35        |
| 1062.6227  | 2         | 1062.6226   | 0.0001    | 60        | 68      | 0        | 34.25     | 32        |
| 1074.5664  | 2         | 1074.5669   | -0.0005   | 181       | 190     | 1        | 42.13     | 39        |
| 1352.8276  | 2         | 1352.8279   | -0.0002   | 226       | 237     | 0        | 30.12     | 26        |
| pep_exp_mr | pep_exp_z | pep_calc_mr | pep_delta | pep_start | pep_end | pep_miss | pep_score | pep_ident |
| 975.4683   | 2         | 975.4695    | -0.0012   | 351       | 359     | 0        | 77.42     | 37        |
| 1026.5496  | 2         | 1026.5498   | -0.0002   | 310       | 318     | 0        | 78.05     | 34        |
| 1076.5257  | 3         | 1076.525    | 0.0007    | 155       | 162     | 1        | 39.09     | 38        |
| 1138.686   | 2         | 1138.6862   | -0.0002   | 253       | 262     | 0        | 63.43     | 28        |
| 1145.5827  | 2         | 1145.5829   | -0.0002   | 242       | 251     | 0        | 68.26     | 38        |
| 1214.5771  | 2         | 1214.5754   | 0.0017    | 381       | 390     | 0        | 75.4      | 35        |
| 1266.7794  | 2         | 1266.7812   | -0.0018   | 252       | 262     | 1        | 47.16     | 26        |
| 1298.6145  | 2         | 1298.6143   | 0.0003    | 47        | 58      | 0        | 70.2      | 36        |
| 1401.6498  | 2         | 1401.6495   | 0.0003    | 163       | 174     | 0        | 90.05     | 35        |
| 1637.8394  | 2         | 1637.8388   | 0.0006    | 263       | 276     | 0        | 95.76     | 37        |
| 1678.7882  | 2         | 1678.7906   | -0.0024   | 63        | 77      | 0        | 67.01     | 37        |
| 1695.8238  | 2         | 1695.8257   | -0.0019   | 337       | 350     | 0        | 77.72     | 37        |
| 1821.9147  | 2         | 1821.9156   | -0.0009   | 3         | 19      | 0        | 95.95     | 38        |
| 1950.8803  | 2         | 1950.8815   | -0.0013   | 363       | 379     | 0        | 146.15    | 35        |
| 1971.9875  | 2         | 1971.9902   | -0.0026   | 104       | 121     | 0        | 161.7     | 37        |
| 2100.0837  | 3         | 2100.0851   | -0.0015   | 104       | 122     | 1        | 71.63     | 37        |
| 2125.0505  | 3         | 2125.0521   | -0.0016   | 1         | 19      | 1        | 42.32     | 37        |
| 2366.1186  | 2         | 2366.1212   | -0.0026   | 277       | 297     | 0        | 76.95     | 36        |
| 2763.3142  | 3         | 2763.3143   | 0         | 217       | 241     | 0        | 107.1     | 37        |
| 2797.3393  | 3         | 2797.3361   | 0.0032    | 78        | 103     | 1        | 57.55     | 37        |
| 3199.4647  | 4         | 3199.4669   | -0.0022   | 20        | 46      | 0        | 49.75     | 35        |
| 3325.4983  | 3         | 3325.5014   | -0.0031   | 123       | 154     | 0        | 63.29     | 34        |
| 1058.5216  | 2         | 1058.5219   | -0.0003   | 310       | 318     | 0        | 57.26     | 35        |
| 1076.5257  | 3         | 1076.525    | 0.0007    | 155       | 162     | 1        | 39.09     | 38        |
| 1138.686   | 2         | 1138.6862   | -0.0002   | 253       | 262     | 0        | 63.43     | 28        |
| 1145.5827  | 2         | 1145.5829   | -0.0002   | 242       | 251     | 0        | 68.26     | 38        |
| 1214.5771  | 2         | 1214.5754   | 0.0017    | 381       | 390     | 0        | 75.4      | 35        |
| 1266.7794  | 2         | 1266.7812   | -0.0018   | 252       | 262     | 1        | 47.16     | 26        |
| 1286.6513  | 2         | 1286.6541   | -0.0027   | 351       | 362     | 0        | 52.13     | 37        |
| 1295.5995  | 2         | 1295.5994   | 0.0002    | 36        | 46      | 0        | 89.3      | 36        |
| 1415.6827  | 2         | 1415.6829   | -0.0002   | 163       | 174     | 0        | 81.16     | 36        |
| 1444.6386  | 2         | 1444.6405   | -0.0019   | 47        | 58      | 0        | 102.66    | 33        |
| 1461.676   | 2         | 1461.6769   | -0.0009   | 325       | 336     | 0        | 79.58     | 36        |
| 1637.8394  | 2         | 1637.8388   | 0.0006    | 263       | 276     | 0        | 95.76     | 37        |
| 1678.7882  | 2         | 1678.7906   | -0.0024   | 63        | 77      | 0        | 67.01     | 37        |
| 1695.8238  | 2         | 1695.8257   | -0.0019   | 337       | 350     | 0        | 77.72     | 37        |
| 1777.8546  | 2         | 1777.8557   | -0.001    | 283       | 297     | 0        | 55.34     | 38        |
| 1821.9147  | 2         | 1821.9156   | -0.0009   | 3         | 19      | 0        | 95.95     | 38        |
| 1871.8621  | 2         | 1871.8625   | -0.0004   | 20        | 35      | 0        | 65.58     | 36        |
| 1950.8803  | 2         | 1950.8815   | -0.0013   | 363       | 379     | 0        | 146.15    | 35        |
| 1971.9875  | 2         | 1971.9902   | -0.0026   | 104       | 121     | 0        | 161.7     | 37        |

|           |   |           |         |     |     |   |        |    |
|-----------|---|-----------|---------|-----|-----|---|--------|----|
| 2100.0837 | 3 | 2100.0851 | -0.0015 | 104 | 122 | 1 | 71.63  | 37 |
| 2125.0505 | 3 | 2125.0521 | -0.0016 | 1   | 19  | 1 | 42.32  | 37 |
| 2766.3114 | 3 | 2766.3139 | -0.0025 | 217 | 241 | 0 | 62.67  | 36 |
| 2801.2921 | 3 | 2801.2946 | -0.0025 | 78  | 103 | 1 | 78.69  | 35 |
| 1058.5216 | 2 | 1058.5219 | -0.0003 | 310 | 318 | 0 | 57.26  | 35 |
| 1076.5257 | 3 | 1076.525  | 0.0007  | 155 | 162 | 1 | 39.09  | 38 |
| 1138.686  | 2 | 1138.6862 | -0.0002 | 253 | 262 | 0 | 63.43  | 28 |
| 1145.5827 | 2 | 1145.5829 | -0.0002 | 242 | 251 | 0 | 68.26  | 38 |
| 1214.5771 | 2 | 1214.5754 | 0.0017  | 381 | 390 | 0 | 75.4   | 35 |
| 1266.7794 | 2 | 1266.7812 | -0.0018 | 252 | 262 | 1 | 47.16  | 26 |
| 1286.6513 | 2 | 1286.6541 | -0.0027 | 351 | 362 | 0 | 52.13  | 37 |
| 1307.6342 | 2 | 1307.6357 | -0.0016 | 36  | 46  | 0 | 72.19  | 38 |
| 1401.6498 | 2 | 1401.6495 | 0.0003  | 163 | 174 | 0 | 90.05  | 35 |
| 1430.6243 | 2 | 1430.6248 | -0.0006 | 47  | 58  | 0 | 81.01  | 32 |
| 1461.676  | 2 | 1461.6769 | -0.0009 | 325 | 336 | 0 | 79.58  | 36 |
| 1637.8394 | 2 | 1637.8388 | 0.0006  | 263 | 276 | 0 | 95.76  | 37 |
| 1664.7729 | 2 | 1664.775  | -0.002  | 63  | 77  | 0 | 68.28  | 37 |
| 1695.8238 | 2 | 1695.8257 | -0.0019 | 337 | 350 | 0 | 77.72  | 37 |
| 1788.8722 | 2 | 1788.8716 | 0.0005  | 283 | 297 | 0 | 56.73  | 38 |
| 1898.9273 | 2 | 1898.9275 | -0.0002 | 20  | 35  | 0 | 115.29 | 37 |
| 1950.8803 | 2 | 1950.8815 | -0.0013 | 363 | 379 | 0 | 146.15 | 35 |
| 1971.9875 | 2 | 1971.9902 | -0.0026 | 104 | 121 | 0 | 161.7  | 37 |
| 2100.0837 | 3 | 2100.0851 | -0.0015 | 104 | 122 | 1 | 71.63  | 37 |
| 2736.3031 | 3 | 2736.3034 | -0.0002 | 217 | 241 | 0 | 54.75  | 37 |
| 2813.327  | 3 | 2813.331  | -0.004  | 78  | 103 | 1 | 101.02 | 36 |
| 1026.5496 | 2 | 1026.5498 | -0.0002 | 310 | 318 | 0 | 78.05  | 34 |
| 1076.5257 | 3 | 1076.525  | 0.0007  | 155 | 162 | 1 | 39.09  | 38 |
| 1138.686  | 2 | 1138.6862 | -0.0002 | 253 | 262 | 0 | 63.43  | 28 |
| 1145.5827 | 2 | 1145.5829 | -0.0002 | 242 | 251 | 0 | 68.26  | 38 |
| 1214.5771 | 2 | 1214.5754 | 0.0017  | 381 | 390 | 0 | 75.4   | 35 |
| 1266.7794 | 2 | 1266.7812 | -0.0018 | 252 | 262 | 1 | 47.16  | 26 |
| 1297.6297 | 2 | 1297.6302 | -0.0005 | 47  | 58  | 0 | 54.33  | 36 |
| 1401.6498 | 2 | 1401.6495 | 0.0003  | 163 | 174 | 0 | 90.05  | 35 |
| 1637.8394 | 2 | 1637.8388 | 0.0006  | 263 | 276 | 0 | 95.76  | 37 |
| 1678.7882 | 2 | 1678.7906 | -0.0024 | 63  | 77  | 0 | 67.01  | 37 |
| 1695.8238 | 2 | 1695.8257 | -0.0019 | 337 | 350 | 0 | 77.72  | 37 |
| 1821.9147 | 2 | 1821.9156 | -0.0009 | 3   | 19  | 0 | 95.95  | 38 |
| 1950.8803 | 2 | 1950.8815 | -0.0013 | 363 | 379 | 0 | 146.15 | 35 |
| 1971.9875 | 2 | 1971.9902 | -0.0026 | 104 | 121 | 0 | 161.7  | 37 |
| 2100.0837 | 3 | 2100.0851 | -0.0015 | 104 | 122 | 1 | 71.63  | 37 |
| 2125.0505 | 3 | 2125.0521 | -0.0016 | 1   | 19  | 1 | 42.32  | 37 |
| 2366.1186 | 2 | 2366.1212 | -0.0026 | 277 | 297 | 0 | 76.95  | 36 |
| 2763.3142 | 3 | 2763.3143 | 0       | 217 | 241 | 0 | 107.1  | 37 |
| 2797.3393 | 3 | 2797.3361 | 0.0032  | 78  | 103 | 1 | 57.55  | 37 |
| 902.4203  | 2 | 902.4208  | -0.0004 | 395 | 401 | 0 | 37.75  | 33 |
| 986.5402  | 2 | 986.5397  | 0.0005  | 327 | 336 | 0 | 65.58  | 37 |
| 1131.5592 | 2 | 1131.5594 | -0.0002 | 113 | 121 | 0 | 40.62  | 37 |
| 1282.4963 | 2 | 1282.4967 | -0.0003 | 312 | 320 | 0 | 45.17  | 24 |
| 1395.6859 | 2 | 1395.6857 | 0.0003  | 391 | 401 | 1 | 41.06  | 37 |
| 1395.7505 | 3 | 1395.751  | -0.0005 | 85  | 96  | 0 | 38.04  | 35 |
| 1472.8563 | 2 | 1472.8562 | 0.0001  | 230 | 243 | 0 | 94.16  | 30 |
| 1597.7591 | 2 | 1597.7599 | -0.0008 | 340 | 352 | 0 | 87.96  | 37 |
| 1662.8664 | 2 | 1662.8689 | -0.0025 | 216 | 229 | 1 | 70.26  | 37 |
| 1700.8967 | 2 | 1700.8985 | -0.0018 | 65  | 79  | 0 | 91.09  | 37 |
| 1791.9206 | 2 | 1791.9229 | -0.0023 | 265 | 280 | 0 | 107.65 | 38 |
| 1856.8747 | 2 | 1856.8761 | -0.0014 | 374 | 390 | 0 | 115.04 | 37 |
| 1884.9378 | 2 | 1884.9404 | -0.0026 | 353 | 370 | 0 | 73.31  | 37 |
| 1976.8742 | 2 | 1976.8752 | -0.0011 | 41  | 60  | 0 | 115.48 | 33 |

|           |   |           |         |     |     |   |        |    |
|-----------|---|-----------|---------|-----|-----|---|--------|----|
| 2345.0006 | 2 | 2345.0059 | -0.0052 | 403 | 422 | 0 | 64.29  | 31 |
| 2384.1867 | 3 | 2384.1873 | -0.0006 | 85  | 105 | 1 | 82.13  | 37 |
| 2394.1838 | 2 | 2394.1856 | -0.0017 | 244 | 264 | 0 | 128.06 | 38 |
| 2640.2176 | 2 | 2640.22   | -0.0023 | 281 | 304 | 0 | 84.91  | 36 |
| 3320.7187 | 3 | 3320.7187 | -0.0001 | 124 | 156 | 1 | 118.55 | 34 |
| 5377.6621 | 4 | 5377.6704 | -0.0083 | 167 | 214 | 0 | 44.04  | 31 |
| 902.4203  | 2 | 902.4208  | -0.0004 | 395 | 401 | 0 | 37.75  | 33 |
| 986.5402  | 2 | 986.5397  | 0.0005  | 327 | 336 | 0 | 65.58  | 37 |
| 1131.5592 | 2 | 1131.5594 | -0.0002 | 113 | 121 | 0 | 40.62  | 37 |
| 1282.4963 | 2 | 1282.4967 | -0.0003 | 312 | 320 | 0 | 45.17  | 24 |
| 1395.6859 | 2 | 1395.6857 | 0.0003  | 391 | 401 | 1 | 41.06  | 37 |
| 1395.7505 | 3 | 1395.751  | -0.0005 | 85  | 96  | 0 | 38.04  | 35 |
| 1472.8563 | 2 | 1472.8562 | 0.0001  | 230 | 243 | 0 | 94.16  | 30 |
| 1597.7591 | 2 | 1597.7599 | -0.0008 | 340 | 352 | 0 | 87.96  | 37 |
| 1689.876  | 2 | 1689.8798 | -0.0038 | 216 | 229 | 1 | 71.61  | 37 |
| 1700.8967 | 2 | 1700.8985 | -0.0018 | 65  | 79  | 0 | 91.09  | 37 |
| 1791.9206 | 2 | 1791.9229 | -0.0023 | 265 | 280 | 0 | 107.65 | 38 |
| 1856.8747 | 2 | 1856.8761 | -0.0014 | 374 | 390 | 0 | 115.04 | 37 |
| 1884.9378 | 2 | 1884.9404 | -0.0026 | 353 | 370 | 0 | 73.31  | 37 |
| 1976.8742 | 2 | 1976.8752 | -0.0011 | 41  | 60  | 0 | 115.48 | 33 |
| 2345.0006 | 2 | 2345.0059 | -0.0052 | 403 | 422 | 0 | 64.29  | 31 |
| 2384.1867 | 3 | 2384.1873 | -0.0006 | 85  | 105 | 1 | 82.13  | 37 |
| 2394.1838 | 2 | 2394.1856 | -0.0017 | 244 | 264 | 0 | 128.06 | 38 |
| 2640.2176 | 2 | 2640.22   | -0.0023 | 281 | 304 | 0 | 84.91  | 36 |
| 3320.7187 | 3 | 3320.7187 | -0.0001 | 124 | 156 | 1 | 118.55 | 34 |
| 5377.6621 | 4 | 5377.6704 | -0.0083 | 167 | 214 | 0 | 44.04  | 31 |
| 949.4863  | 2 | 949.4869  | -0.0006 | 129 | 137 | 0 | 44.68  | 37 |
| 957.5128  | 2 | 957.5131  | -0.0002 | 118 | 125 | 0 | 59.11  | 35 |
| 1003.5345 | 2 | 1003.5338 | 0.0007  | 290 | 297 | 1 | 43.74  | 38 |
| 1016.5388 | 2 | 1016.539  | -0.0002 | 245 | 253 | 0 | 50.57  | 38 |
| 1046.5076 | 2 | 1046.5073 | 0.0004  | 53  | 61  | 0 | 40.23  | 37 |
| 1113.6757 | 2 | 1113.6758 | -0.0001 | 331 | 340 | 0 | 80.17  | 31 |
| 1141.5657 | 2 | 1141.5663 | -0.0006 | 138 | 148 | 0 | 62.07  | 35 |
| 1172.6401 | 2 | 1172.6401 | 0       | 244 | 253 | 1 | 58.44  | 38 |
| 1400.7246 | 2 | 1400.726  | -0.0014 | 76  | 89  | 0 | 113.04 | 37 |
| 1446.744  | 2 | 1446.7467 | -0.0027 | 376 | 388 | 0 | 93.79  | 38 |
| 1501.8695 | 2 | 1501.8729 | -0.0035 | 153 | 167 | 0 | 107.66 | 31 |
| 1574.8399 | 2 | 1574.8417 | -0.0017 | 375 | 388 | 1 | 124.57 | 37 |
| 1586.6943 | 2 | 1586.6956 | -0.0013 | 184 | 196 | 0 | 105.64 | 33 |
| 1588.8505 | 2 | 1588.8501 | 0.0004  | 200 | 212 | 0 | 54.43  | 36 |
| 1826.9299 | 2 | 1826.9315 | -0.0016 | 53  | 68  | 1 | 112.17 | 37 |
| 1919.9959 | 2 | 1919.988  | 0.0079  | 396 | 412 | 0 | 54.79  | 37 |
| 1921.0328 | 2 | 1921.0349 | -0.0021 | 197 | 212 | 1 | 56.1   | 35 |
| 2074.076  | 2 | 2074.0769 | -0.0008 | 213 | 231 | 0 | 112.02 | 37 |
| 2698.3882 | 2 | 2698.3888 | -0.0005 | 266 | 288 | 0 | 96.87  | 35 |
| 2894.4936 | 2 | 2894.4927 | 0.001   | 341 | 365 | 0 | 86.39  | 35 |
| 3136.6072 | 2 | 3136.6049 | 0.0023  | 90  | 117 | 0 | 88.86  | 35 |
| 934.5115  | 2 | 934.5124  | -0.0009 | 129 | 137 | 0 | 58.86  | 35 |
| 957.5128  | 2 | 957.5131  | -0.0002 | 118 | 125 | 0 | 59.11  | 35 |
| 975.5478  | 2 | 975.5502  | -0.0023 | 376 | 384 | 0 | 61.73  | 36 |
| 1003.5345 | 2 | 1003.5338 | 0.0007  | 290 | 297 | 1 | 43.74  | 38 |
| 1016.5388 | 2 | 1016.539  | -0.0002 | 245 | 253 | 0 | 50.57  | 38 |
| 1046.5076 | 2 | 1046.5073 | 0.0004  | 53  | 61  | 0 | 40.23  | 37 |
| 1103.6447 | 2 | 1103.6451 | -0.0005 | 375 | 384 | 1 | 45.52  | 33 |
| 1113.6757 | 2 | 1113.6758 | -0.0001 | 331 | 340 | 0 | 80.17  | 31 |
| 1141.5657 | 2 | 1141.5663 | -0.0006 | 138 | 148 | 0 | 62.07  | 35 |
| 1172.6401 | 2 | 1172.6401 | 0       | 244 | 253 | 1 | 58.44  | 38 |
| 1400.7246 | 2 | 1400.726  | -0.0014 | 76  | 89  | 0 | 113.04 | 37 |

|           |   |           |         |      |      |   |        |    |
|-----------|---|-----------|---------|------|------|---|--------|----|
| 1501.8695 | 2 | 1501.8729 | -0.0035 | 153  | 167  | 0 | 107.66 | 31 |
| 1586.6943 | 2 | 1586.6956 | -0.0013 | 184  | 196  | 0 | 105.64 | 33 |
| 1588.8505 | 2 | 1588.8501 | 0.0004  | 200  | 212  | 0 | 54.43  | 36 |
| 1826.9299 | 2 | 1826.9315 | -0.0016 | 53   | 68   | 1 | 112.17 | 37 |
| 1919.9959 | 2 | 1919.988  | 0.0079  | 396  | 412  | 0 | 54.79  | 37 |
| 1921.0328 | 2 | 1921.0349 | -0.0021 | 197  | 212  | 1 | 56.1   | 35 |
| 2074.076  | 2 | 2074.0769 | -0.0008 | 213  | 231  | 0 | 112.02 | 37 |
| 2698.3882 | 2 | 2698.3888 | -0.0005 | 266  | 288  | 0 | 96.87  | 35 |
| 2894.4936 | 2 | 2894.4927 | 0.001   | 341  | 365  | 0 | 86.39  | 35 |
| 3918.7588 | 3 | 3917.7942 | 0.9646  | 20   | 52   | 0 | 45.16  | 32 |
| 1227.6194 | 2 | 1227.6207 | -0.0013 | 29   | 39   | 0 | 73.88  | 36 |
| 1230.6384 | 2 | 1230.6391 | -0.0006 | 164  | 175  | 0 | 68.57  | 38 |
| 1293.6173 | 2 | 1293.6176 | -0.0003 | 243  | 252  | 0 | 42.59  | 37 |
| 1305.7175 | 2 | 1305.718  | -0.0005 | 133  | 144  | 0 | 61.42  | 35 |
| 1328.6062 | 2 | 1328.6071 | -0.0009 | 308  | 317  | 0 | 65.49  | 35 |
| 1373.6017 | 2 | 1373.6033 | -0.0016 | 546  | 556  | 0 | 66.77  | 32 |
| 1385.7219 | 2 | 1385.7224 | -0.0005 | 604  | 615  | 0 | 54.58  | 37 |
| 1425.7568 | 2 | 1425.7576 | -0.0008 | 335  | 348  | 0 | 77.38  | 36 |
| 1435.7455 | 2 | 1435.746  | -0.0005 | 352  | 363  | 0 | 88     | 37 |
| 1472.6777 | 2 | 1472.6783 | -0.0006 | 40   | 52   | 0 | 73.97  | 35 |
| 1555.7451 | 3 | 1555.7453 | -0.0002 | 306  | 317  | 1 | 39.01  | 37 |
| 1565.8007 | 2 | 1565.8011 | -0.0003 | 117  | 130  | 0 | 85.6   | 37 |
| 1662.803  | 2 | 1662.8036 | -0.0006 | 60   | 74   | 0 | 107.4  | 38 |
| 1674.722  | 2 | 1674.7234 | -0.0014 | 227  | 242  | 0 | 93.76  | 32 |
| 1679.8246 | 2 | 1679.8267 | -0.0021 | 145  | 159  | 0 | 42.35  | 38 |
| 2559.2448 | 2 | 2559.2452 | -0.0004 | 368  | 393  | 0 | 117.52 | 37 |
| 2587.2102 | 3 | 2587.2126 | -0.0024 | 5    | 28   | 0 | 54.09  | 36 |
| 2657.2566 | 2 | 2657.2609 | -0.0043 | 431  | 453  | 0 | 100.3  | 36 |
| 3019.3945 | 3 | 3019.3934 | 0.0011  | 576  | 601  | 0 | 53.26  | 35 |
| 3024.4786 | 3 | 3024.4815 | -0.003  | 279  | 305  | 0 | 53.04  | 36 |
| 3050.6922 | 2 | 3050.6937 | -0.0015 | 394  | 422  | 0 | 38.43  | 28 |
| 3147.4882 | 3 | 3147.4884 | -0.0002 | 575  | 601  | 1 | 90.03  | 36 |
| 832.5056  | 2 | 832.5058  | -0.0002 | 4069 | 4075 | 0 | 34.2   | 30 |
| 914.5799  | 2 | 914.58    | -0.0001 | 1793 | 1801 | 0 | 53.34  | 29 |
| 1034.5761 | 2 | 1034.576  | 0.0001  | 11   | 19   | 0 | 42.28  | 35 |
| 1248.6897 | 2 | 1248.69   | -0.0003 | 3736 | 3746 | 0 | 82.48  | 35 |
| 1263.6481 | 2 | 1263.6499 | -0.0018 | 4098 | 4108 | 0 | 41.32  | 38 |
| 1419.772  | 2 | 1419.7722 | -0.0001 | 2674 | 2686 | 0 | 98.93  | 36 |
| 1439.748  | 2 | 1439.7483 | -0.0003 | 23   | 35   | 0 | 53.14  | 36 |
| 1477.6731 | 2 | 1477.6732 | -0.0002 | 1896 | 1909 | 0 | 94.1   | 35 |
| 1540.8385 | 2 | 1540.8395 | -0.001  | 4372 | 4384 | 0 | 62.1   | 34 |
| 1618.8925 | 2 | 1618.893  | -0.0005 | 3071 | 3085 | 0 | 97.62  | 34 |
| 1706.9243 | 2 | 1706.9243 | 0.0001  | 4396 | 4410 | 0 | 106.61 | 35 |
| 1727.9391 | 2 | 1727.9393 | -0.0002 | 227  | 241  | 0 | 74.69  | 35 |
| 1885.0929 | 2 | 1885.0924 | 0.0005  | 4280 | 4296 | 0 | 44.68  | 27 |
| 1928.9619 | 3 | 1928.9626 | -0.0007 | 3156 | 3173 | 0 | 58.08  | 37 |
| 2029.084  | 2 | 2029.0844 | -0.0003 | 5284 | 5302 | 0 | 89.54  | 35 |
| 2053.0026 | 2 | 2053.0019 | 0.0007  | 5353 | 5368 | 0 | 67.05  | 38 |
| 2066.0846 | 3 | 2066.0836 | 0.0009  | 135  | 152  | 0 | 63.44  | 36 |
| 2092.0862 | 2 | 2092.0874 | -0.0012 | 4244 | 4261 | 0 | 120.99 | 36 |
| 2109.174  | 2 | 2109.1721 | 0.0019  | 3757 | 3775 | 0 | 34.58  | 31 |
| 2164.037  | 2 | 2164.0378 | -0.0007 | 1614 | 1630 | 0 | 83.11  | 37 |
| 2198.06   | 2 | 2198.0605 | -0.0005 | 995  | 1014 | 0 | 100.04 | 37 |
| 2530.3182 | 3 | 2530.318  | 0.0002  | 1139 | 1161 | 0 | 46.13  | 36 |
| 1225.5824 | 2 | 1225.5827 | -0.0003 | 81   | 91   | 0 | 71.67  | 35 |
| 1227.6194 | 2 | 1227.6207 | -0.0013 | 29   | 39   | 0 | 73.88  | 36 |
| 1230.6384 | 2 | 1230.6391 | -0.0006 | 164  | 175  | 0 | 68.57  | 38 |
| 1293.6173 | 2 | 1293.6176 | -0.0003 | 243  | 252  | 0 | 42.59  | 37 |

|           |   |           |         |      |      |   |        |    |
|-----------|---|-----------|---------|------|------|---|--------|----|
| 1294.6561 | 2 | 1294.6557 | 0.0004  | 308  | 317  | 0 | 56.65  | 37 |
| 1307.6972 | 2 | 1307.6972 | 0       | 133  | 144  | 0 | 58.13  | 36 |
| 1373.6017 | 2 | 1373.6033 | -0.0016 | 546  | 556  | 0 | 66.77  | 32 |
| 1385.7219 | 2 | 1385.7224 | -0.0005 | 604  | 615  | 0 | 54.58  | 37 |
| 1406.7557 | 2 | 1406.7558 | -0.0001 | 352  | 363  | 0 | 105.13 | 35 |
| 1430.7374 | 2 | 1430.7365 | 0.0009  | 335  | 348  | 0 | 89.84  | 37 |
| 1472.6777 | 2 | 1472.6783 | -0.0006 | 40   | 52   | 0 | 73.97  | 35 |
| 1521.7939 | 2 | 1521.7939 | 0       | 306  | 317  | 1 | 51.31  | 37 |
| 1674.722  | 2 | 1674.7234 | -0.0014 | 227  | 242  | 0 | 93.76  | 32 |
| 1676.8173 | 2 | 1676.8192 | -0.0019 | 60   | 74   | 0 | 104.93 | 38 |
| 1679.8246 | 2 | 1679.8267 | -0.0021 | 145  | 159  | 0 | 42.35  | 38 |
| 2573.2572 | 2 | 2573.2609 | -0.0036 | 368  | 393  | 0 | 150.66 | 37 |
| 2587.2102 | 3 | 2587.2126 | -0.0024 | 5    | 28   | 0 | 54.09  | 36 |
| 2657.2566 | 2 | 2657.2609 | -0.0043 | 431  | 453  | 0 | 100.3  | 36 |
| 3064.7296 | 3 | 3063.7254 | 1.0042  | 394  | 422  | 0 | 36.74  | 25 |
| 3194.4595 | 3 | 3194.4601 | -0.0006 | 575  | 601  | 1 | 79.89  | 35 |
| 1003.4762 | 2 | 1003.4757 | 0.0005  | 351  | 359  | 0 | 46.11  | 36 |
| 1058.5216 | 2 | 1058.5219 | -0.0003 | 310  | 318  | 0 | 57.26  | 35 |
| 1076.5257 | 3 | 1076.525  | 0.0007  | 155  | 162  | 1 | 39.09  | 38 |
| 1138.686  | 2 | 1138.6862 | -0.0002 | 253  | 262  | 0 | 63.43  | 28 |
| 1145.5827 | 2 | 1145.5829 | -0.0002 | 242  | 251  | 0 | 68.26  | 38 |
| 1214.5771 | 2 | 1214.5754 | 0.0017  | 381  | 390  | 0 | 75.4   | 35 |
| 1266.7794 | 2 | 1266.7812 | -0.0018 | 252  | 262  | 1 | 47.16  | 26 |
| 1292.6362 | 2 | 1292.6361 | 0.0001  | 36   | 46   | 0 | 81.65  | 38 |
| 1415.6827 | 2 | 1415.6829 | -0.0002 | 163  | 174  | 0 | 81.16  | 36 |
| 1430.6243 | 2 | 1430.6248 | -0.0006 | 47   | 58   | 0 | 81.01  | 32 |
| 1461.676  | 2 | 1461.6769 | -0.0009 | 325  | 336  | 0 | 79.58  | 36 |
| 1637.8394 | 2 | 1637.8388 | 0.0006  | 263  | 276  | 0 | 95.76  | 37 |
| 1695.8238 | 2 | 1695.8257 | -0.0019 | 337  | 350  | 0 | 77.72  | 37 |
| 1955.9915 | 2 | 1955.9953 | -0.0038 | 104  | 121  | 0 | 157.53 | 37 |
| 2766.3114 | 3 | 2766.3139 | -0.0025 | 217  | 241  | 0 | 62.67  | 36 |
| 2827.3449 | 3 | 2827.3467 | -0.0018 | 78   | 103  | 1 | 66.38  | 36 |
| 955.5019  | 2 | 955.5015  | 0.0004  | 1696 | 1703 | 0 | 59.68  | 34 |
| 1070.5363 | 2 | 1070.5356 | 0.0007  | 1206 | 1215 | 0 | 36.6   | 35 |
| 1204.816  | 2 | 1204.8159 | 0.0001  | 1902 | 1912 | 0 | 53.83  | 20 |
| 1359.7511 | 2 | 1359.751  | 0.0001  | 391  | 403  | 0 | 95.55  | 36 |
| 1361.7377 | 2 | 1361.7377 | 0       | 1194 | 1205 | 0 | 81.22  | 36 |
| 1444.7924 | 2 | 1444.7926 | -0.0001 | 882  | 895  | 0 | 97.99  | 36 |
| 1447.7914 | 2 | 1447.7922 | -0.0008 | 1775 | 1787 | 0 | 88.45  | 35 |
| 1594.9433 | 2 | 1594.9446 | -0.0013 | 283  | 296  | 0 | 38.85  | 28 |
| 1760.9493 | 2 | 1760.9495 | -0.0002 | 1939 | 1953 | 0 | 91.41  | 35 |
| 2048.0984 | 2 | 2048.0983 | 0.0002  | 957  | 974  | 0 | 107.81 | 35 |
| 2097.1814 | 2 | 2097.182  | -0.0006 | 2083 | 2101 | 0 | 128.19 | 30 |
| 2193.2254 | 2 | 2193.2256 | -0.0002 | 440  | 459  | 0 | 58.05  | 30 |
| 2237.3144 | 3 | 2237.3147 | -0.0003 | 2208 | 2228 | 1 | 42.91  | 20 |
| 2239.167  | 2 | 2239.1696 | -0.0026 | 2495 | 2515 | 0 | 106.87 | 36 |
| 2555.3474 | 2 | 2555.3483 | -0.0008 | 1514 | 1536 | 0 | 81.11  | 34 |
| 3139.7381 | 4 | 3139.7394 | -0.0013 | 1537 | 1565 | 0 | 47.37  | 28 |
| 1058.5216 | 2 | 1058.5219 | -0.0003 | 311  | 319  | 0 | 57.26  | 35 |
| 1076.5257 | 3 | 1076.525  | 0.0007  | 156  | 163  | 1 | 39.09  | 38 |
| 1138.686  | 2 | 1138.6862 | -0.0002 | 254  | 263  | 0 | 63.43  | 28 |
| 1145.5827 | 2 | 1145.5829 | -0.0002 | 243  | 252  | 0 | 68.26  | 38 |
| 1214.5771 | 2 | 1214.5754 | 0.0017  | 382  | 391  | 0 | 75.4   | 35 |
| 1266.7794 | 2 | 1266.7812 | -0.0018 | 253  | 263  | 1 | 47.16  | 26 |
| 1379.6334 | 2 | 1379.6317 | 0.0017  | 36   | 47   | 0 | 71.02  | 36 |
| 1415.6827 | 2 | 1415.6829 | -0.0002 | 164  | 175  | 0 | 81.16  | 36 |
| 1637.8394 | 2 | 1637.8388 | 0.0006  | 264  | 277  | 0 | 95.76  | 37 |
| 1678.7882 | 2 | 1678.7906 | -0.0024 | 64   | 78   | 0 | 67.01  | 37 |

|           |   |           |         |      |      |   |        |    |
|-----------|---|-----------|---------|------|------|---|--------|----|
| 1695.8238 | 2 | 1695.8257 | -0.0019 | 338  | 351  | 0 | 77.72  | 37 |
| 1955.9915 | 2 | 1955.9953 | -0.0038 | 105  | 122  | 0 | 157.53 | 37 |
| 2813.327  | 3 | 2813.331  | -0.004  | 79   | 104  | 1 | 101.02 | 36 |
| 847.4912  | 2 | 847.4916  | -0.0003 | 445  | 452  | 0 | 59.61  | 35 |
| 950.4821  | 2 | 950.4821  | 0       | 974  | 982  | 0 | 44.09  | 37 |
| 971.5288  | 2 | 971.5287  | 0       | 41   | 48   | 0 | 53.79  | 35 |
| 987.5536  | 2 | 987.5535  | 0.0001  | 353  | 361  | 0 | 65.39  | 37 |
| 1080.6906 | 2 | 1080.6907 | -0.0001 | 730  | 739  | 0 | 36.74  | 21 |
| 1151.5933 | 2 | 1151.5935 | -0.0002 | 1073 | 1082 | 0 | 59.35  | 37 |
| 1268.7084 | 2 | 1268.7088 | -0.0004 | 512  | 524  | 0 | 67.11  | 34 |
| 1291.6374 | 2 | 1291.6377 | -0.0002 | 230  | 240  | 0 | 63.07  | 38 |
| 1467.7753 | 2 | 1467.7755 | -0.0003 | 599  | 611  | 0 | 55.44  | 36 |
| 1482.7542 | 2 | 1482.7541 | 0.0001  | 389  | 400  | 0 | 94.48  | 37 |
| 1567.8252 | 2 | 1567.8246 | 0.0006  | 273  | 285  | 0 | 78.34  | 36 |
| 1926.0733 | 3 | 1926.0721 | 0.0013  | 172  | 188  | 0 | 56.61  | 32 |
| 1947.0493 | 3 | 1947.0499 | -0.0007 | 1135 | 1152 | 0 | 67.59  | 35 |
| 1964.0135 | 2 | 1964.0136 | -0.0001 | 191  | 209  | 0 | 129.65 | 37 |
| 2006.1166 | 2 | 2006.1162 | 0.0005  | 1000 | 1016 | 0 | 70.65  | 31 |
| 2240.2254 | 2 | 2240.2264 | -0.0009 | 49   | 70   | 0 | 132.06 | 32 |
| 2500.3341 | 3 | 2500.336  | -0.0019 | 453  | 475  | 0 | 40.1   | 34 |
| 2659.3374 | 3 | 2659.3381 | -0.0007 | 847  | 870  | 0 | 61.51  | 37 |
| 3336.6946 | 3 | 3336.699  | -0.0044 | 871  | 901  | 0 | 53.37  | 35 |
| 1094.6374 | 2 | 1094.6376 | -0.0001 | 382  | 390  | 0 | 51.85  | 31 |
| 1128.6387 | 2 | 1128.6391 | -0.0003 | 465  | 476  | 0 | 51.62  | 35 |
| 1156.6437 | 2 | 1156.6452 | -0.0015 | 316  | 326  | 0 | 101.83 | 36 |
| 1388.6649 | 2 | 1388.6646 | 0.0003  | 330  | 341  | 0 | 74.4   | 36 |
| 1680.9409 | 2 | 1680.941  | -0.0001 | 342  | 357  | 0 | 115.01 | 32 |
| 1767.7786 | 3 | 1767.7787 | -0.0002 | 143  | 157  | 0 | 59.44  | 34 |
| 1809.8719 | 2 | 1809.8745 | -0.0026 | 127  | 142  | 0 | 111    | 37 |
| 1827.9563 | 3 | 1827.9587 | -0.0024 | 441  | 456  | 0 | 53.41  | 36 |
| 1906.0435 | 2 | 1906.0445 | -0.001  | 93   | 112  | 0 | 81.54  | 33 |
| 2066.0004 | 2 | 2066.003  | -0.0026 | 266  | 282  | 0 | 94.5   | 37 |
| 2113.0424 | 2 | 2113.0426 | -0.0002 | 205  | 222  | 0 | 130.49 | 37 |
| 2134.1308 | 2 | 2134.131  | -0.0002 | 283  | 301  | 0 | 112.04 | 35 |
| 2578.2786 | 3 | 2578.2777 | 0.0008  | 262  | 282  | 1 | 62.1   | 37 |
| 3434.734  | 3 | 3434.7344 | -0.0004 | 223  | 254  | 0 | 37.78  | 35 |
| 902.4203  | 2 | 902.4208  | -0.0004 | 395  | 401  | 0 | 37.75  | 33 |
| 986.5402  | 2 | 986.5397  | 0.0005  | 327  | 336  | 0 | 65.58  | 37 |
| 1131.5592 | 2 | 1131.5594 | -0.0002 | 113  | 121  | 0 | 40.62  | 37 |
| 1282.4963 | 2 | 1282.4967 | -0.0003 | 312  | 320  | 0 | 45.17  | 24 |
| 1395.6859 | 2 | 1395.6857 | 0.0003  | 391  | 401  | 1 | 41.06  | 37 |
| 1395.7505 | 3 | 1395.751  | -0.0005 | 85   | 96   | 0 | 38.04  | 35 |
| 1530.8972 | 2 | 1530.8981 | -0.0009 | 230  | 243  | 0 | 112.63 | 28 |
| 1583.744  | 2 | 1583.7443 | -0.0003 | 340  | 352  | 0 | 73.14  | 36 |
| 1690.8617 | 2 | 1690.8638 | -0.0021 | 216  | 229  | 1 | 61.44  | 38 |
| 1700.8967 | 2 | 1700.8985 | -0.0018 | 65   | 79   | 0 | 91.09  | 37 |
| 1749.9139 | 2 | 1749.9124 | 0.0015  | 265  | 280  | 0 | 94.92  | 37 |
| 1884.9378 | 2 | 1884.9404 | -0.0026 | 353  | 370  | 0 | 73.31  | 37 |
| 2345.0006 | 2 | 2345.0059 | -0.0052 | 403  | 422  | 0 | 64.29  | 31 |
| 2384.1867 | 3 | 2384.1873 | -0.0006 | 85   | 105  | 1 | 82.13  | 37 |
| 2408.196  | 2 | 2408.2012 | -0.0052 | 244  | 264  | 0 | 112.41 | 38 |
| 3320.7187 | 3 | 3320.7187 | -0.0001 | 124  | 156  | 1 | 118.55 | 34 |
| 1036.5241 | 2 | 1036.5223 | 0.0018  | 686  | 694  | 0 | 51.34  | 37 |
| 1155.5339 | 2 | 1155.5342 | -0.0003 | 224  | 233  | 0 | 38.98  | 35 |
| 1254.6677 | 2 | 1254.6681 | -0.0004 | 828  | 840  | 0 | 82.05  | 35 |
| 1266.602  | 2 | 1266.6026 | -0.0006 | 660  | 669  | 0 | 52.36  | 37 |
| 1276.6141 | 2 | 1276.6147 | -0.0005 | 575  | 586  | 0 | 66.6   | 37 |
| 1335.6665 | 2 | 1335.667  | -0.0005 | 157  | 168  | 0 | 66.88  | 38 |

|           |   |           |         |     |     |   |        |    |
|-----------|---|-----------|---------|-----|-----|---|--------|----|
| 1402.8586 | 2 | 1402.8588 | -0.0001 | 562 | 574 | 0 | 86.97  | 20 |
| 1507.6968 | 3 | 1507.6977 | -0.0009 | 102 | 114 | 1 | 49.25  | 36 |
| 1564.9005 | 2 | 1564.9011 | -0.0006 | 671 | 685 | 0 | 76.86  | 29 |
| 1715.0272 | 2 | 1715.0273 | -0.0001 | 869 | 883 | 0 | 38.64  | 22 |
| 1974.0351 | 3 | 1973.0326 | 1.0026  | 811 | 827 | 1 | 40.34  | 36 |
| 2053.0382 | 2 | 2053.0401 | -0.0019 | 115 | 133 | 0 | 93.25  | 37 |
| 2111.0444 | 2 | 2111.0436 | 0.0008  | 368 | 387 | 0 | 122.99 | 37 |
| 2443.3969 | 3 | 2443.3978 | -0.0008 | 862 | 883 | 1 | 45.46  | 26 |
| 2465.1369 | 3 | 2465.138  | -0.0011 | 462 | 483 | 1 | 74.52  | 36 |
| 2676.2766 | 3 | 2676.2775 | -0.0009 | 170 | 192 | 0 | 38.69  | 37 |
| 2991.4388 | 3 | 2991.4383 | 0.0005  | 193 | 218 | 0 | 85.09  | 36 |
| 832.4565  | 2 | 832.4555  | 0.001   | 8   | 15  | 0 | 48.32  | 38 |
| 1037.5389 | 2 | 1037.5393 | -0.0004 | 256 | 264 | 1 | 42.65  | 36 |
| 1139.6371 | 2 | 1139.6373 | -0.0002 | 328 | 337 | 0 | 68.2   | 33 |
| 1433.7509 | 2 | 1433.7514 | -0.0005 | 205 | 219 | 0 | 38.81  | 38 |
| 1497.8394 | 2 | 1497.8403 | -0.0009 | 239 | 252 | 0 | 117.56 | 34 |
| 1675.9661 | 3 | 1675.9661 | 0       | 70  | 84  | 1 | 56.58  | 29 |
| 1749.8028 | 2 | 1749.8032 | -0.0005 | 131 | 145 | 0 | 56.72  | 36 |
| 1760.7803 | 2 | 1760.7794 | 0.0009  | 314 | 327 | 0 | 75.81  | 33 |
| 2032.064  | 2 | 2032.0663 | -0.0023 | 172 | 190 | 0 | 129.29 | 37 |
| 2171      | 2 | 2171.0019 | -0.0018 | 276 | 295 | 0 | 147.08 | 36 |
| 2249.0654 | 2 | 2249.0668 | -0.0013 | 146 | 166 | 0 | 151.52 | 37 |
| 2922.3549 | 3 | 2922.356  | -0.0011 | 85  | 111 | 1 | 47.48  | 35 |
| 779.4056  | 2 | 779.4065  | -0.0009 | 167 | 172 | 0 | 37.9   | 37 |
| 913.5592  | 2 | 913.5597  | -0.0004 | 419 | 427 | 0 | 57.74  | 33 |
| 1024.6017 | 2 | 1024.603  | -0.0013 | 244 | 254 | 0 | 70.5   | 31 |
| 1025.4815 | 2 | 1025.4818 | -0.0003 | 205 | 212 | 0 | 45.01  | 35 |
| 1119.5911 | 2 | 1119.5924 | -0.0013 | 21  | 30  | 0 | 52.22  | 37 |
| 1297.7397 | 2 | 1297.7394 | 0.0003  | 135 | 146 | 0 | 104.26 | 33 |
| 1450.6652 | 2 | 1450.6663 | -0.0011 | 85  | 96  | 0 | 77.53  | 36 |
| 1633.8927 | 3 | 1633.894  | -0.0013 | 6   | 20  | 0 | 56.51  | 34 |
| 1636.867  | 2 | 1636.8672 | -0.0001 | 213 | 227 | 0 | 86.01  | 36 |
| 1762.9156 | 2 | 1762.9176 | -0.002  | 262 | 278 | 0 | 57.15  | 37 |
| 2311.1206 | 3 | 2311.1228 | -0.0022 | 392 | 411 | 1 | 62.32  | 37 |
| 2505.32   | 3 | 2505.3223 | -0.0023 | 255 | 278 | 1 | 59.31  | 35 |
| 2972.4074 | 2 | 2972.4107 | -0.0033 | 101 | 129 | 0 | 132.85 | 36 |
| 934.5115  | 2 | 934.5124  | -0.0009 | 131 | 139 | 0 | 58.86  | 35 |
| 957.5128  | 2 | 957.5131  | -0.0002 | 120 | 127 | 0 | 59.11  | 35 |
| 1003.5345 | 2 | 1003.5338 | 0.0007  | 292 | 299 | 1 | 43.74  | 38 |
| 1016.5388 | 2 | 1016.539  | -0.0002 | 247 | 255 | 0 | 50.57  | 38 |
| 1046.5076 | 2 | 1046.5073 | 0.0004  | 55  | 63  | 0 | 40.23  | 37 |
| 1113.6757 | 2 | 1113.6758 | -0.0001 | 333 | 342 | 0 | 80.17  | 31 |
| 1172.6401 | 2 | 1172.6401 | 0       | 246 | 255 | 1 | 58.44  | 38 |
| 1400.7246 | 2 | 1400.726  | -0.0014 | 78  | 91  | 0 | 113.04 | 37 |
| 1586.6943 | 2 | 1586.6956 | -0.0013 | 186 | 198 | 0 | 105.64 | 33 |
| 1826.9299 | 2 | 1826.9315 | -0.0016 | 55  | 70  | 1 | 112.17 | 37 |
| 1919.9959 | 2 | 1919.988  | 0.0079  | 398 | 414 | 0 | 54.79  | 37 |
| 2060.0592 | 2 | 2060.0612 | -0.002  | 215 | 233 | 0 | 97.09  | 37 |
| 2698.3882 | 2 | 2698.3888 | -0.0005 | 268 | 290 | 0 | 96.87  | 35 |
| 2894.4936 | 2 | 2894.4927 | 0.001   | 343 | 367 | 0 | 86.39  | 35 |
| 765.4862  | 2 | 765.4861  | 0.0001  | 200 | 206 | 1 | 24.65  | 23 |
| 865.5134  | 2 | 865.5134  | 0       | 350 | 356 | 0 | 36.15  | 30 |
| 1129.5795 | 2 | 1129.5801 | -0.0007 | 320 | 329 | 0 | 37.12  | 36 |
| 1157.6439 | 2 | 1157.6445 | -0.0005 | 207 | 218 | 0 | 43.33  | 37 |
| 1194.5516 | 2 | 1194.5517 | -0.0001 | 372 | 382 | 0 | 63.69  | 36 |
| 1294.6351 | 2 | 1294.634  | 0.0012  | 224 | 235 | 0 | 63.34  | 37 |
| 1304.6575 | 2 | 1304.6581 | -0.0005 | 383 | 394 | 0 | 74.08  | 38 |
| 1643.8692 | 2 | 1643.8705 | -0.0013 | 236 | 251 | 0 | 67.14  | 37 |

|           |   |           |         |     |     |   |        |    |
|-----------|---|-----------|---------|-----|-----|---|--------|----|
| 1864.0138 | 3 | 1864.0128 | 0.001   | 179 | 194 | 0 | 52.71  | 34 |
| 1885.8933 | 2 | 1885.8945 | -0.0012 | 141 | 156 | 0 | 77.02  | 37 |
| 1982.9245 | 2 | 1982.9255 | -0.001  | 294 | 310 | 0 | 147.29 | 37 |
| 2032.0538 | 3 | 2032.0551 | -0.0012 | 262 | 279 | 1 | 73.76  | 37 |
| 2256.06   | 3 | 2256.0658 | -0.0058 | 396 | 415 | 0 | 72.97  | 36 |
| 2268.0083 | 3 | 2268.0103 | -0.002  | 159 | 178 | 1 | 71.28  | 34 |
| 2719.5167 | 3 | 2719.5161 | 0.0006  | 115 | 140 | 1 | 69.56  | 28 |
| 3830.7808 | 3 | 3829.784  | 0.9968  | 69  | 102 | 0 | 67.09  | 34 |
| 1227.6194 | 2 | 1227.6207 | -0.0013 | 29  | 39  | 0 | 73.88  | 36 |
| 1293.6173 | 2 | 1293.6176 | -0.0003 | 243 | 252 | 0 | 42.59  | 37 |
| 1328.6062 | 2 | 1328.6071 | -0.0009 | 308 | 317 | 0 | 65.49  | 35 |
| 1373.6017 | 2 | 1373.6033 | -0.0016 | 546 | 556 | 0 | 66.77  | 32 |
| 1435.7455 | 2 | 1435.746  | -0.0005 | 352 | 363 | 0 | 88     | 37 |
| 1472.6777 | 2 | 1472.6783 | -0.0006 | 40  | 52  | 0 | 73.97  | 35 |
| 1555.7451 | 3 | 1555.7453 | -0.0002 | 306 | 317 | 1 | 39.01  | 37 |
| 1664.781  | 2 | 1664.7828 | -0.0018 | 60  | 74  | 0 | 100.45 | 37 |
| 1674.722  | 2 | 1674.7234 | -0.0014 | 227 | 242 | 0 | 93.76  | 32 |
| 1679.8246 | 2 | 1679.8267 | -0.0021 | 145 | 159 | 0 | 42.35  | 38 |
| 2573.2572 | 2 | 2573.2609 | -0.0036 | 368 | 393 | 0 | 150.66 | 37 |
| 2587.2102 | 3 | 2587.2126 | -0.0024 | 5   | 28  | 0 | 54.09  | 36 |
| 1196.6869 | 2 | 1196.6877 | -0.0008 | 164 | 175 | 0 | 67.79  | 33 |
| 1227.6194 | 2 | 1227.6207 | -0.0013 | 29  | 39  | 0 | 73.88  | 36 |
| 1277.6868 | 2 | 1277.6867 | 0.0001  | 133 | 144 | 0 | 57.89  | 36 |
| 1293.6173 | 2 | 1293.6176 | -0.0003 | 243 | 252 | 0 | 42.59  | 37 |
| 1373.6017 | 2 | 1373.6033 | -0.0016 | 546 | 556 | 0 | 66.77  | 32 |
| 1435.7455 | 2 | 1435.746  | -0.0005 | 352 | 363 | 0 | 88     | 37 |
| 1472.6777 | 2 | 1472.6783 | -0.0006 | 40  | 52  | 0 | 73.97  | 35 |
| 1662.803  | 2 | 1662.8036 | -0.0006 | 60  | 74  | 0 | 107.4  | 38 |
| 1674.722  | 2 | 1674.7234 | -0.0014 | 227 | 242 | 0 | 93.76  | 32 |
| 1679.8246 | 2 | 1679.8267 | -0.0021 | 145 | 159 | 0 | 42.35  | 38 |
| 2573.2572 | 2 | 2573.2609 | -0.0036 | 368 | 393 | 0 | 150.66 | 37 |
| 2587.2102 | 3 | 2587.2126 | -0.0024 | 5   | 28  | 0 | 54.09  | 36 |
| 792.4384  | 2 | 792.4382  | 0.0002  | 219 | 225 | 0 | 43.52  | 35 |
| 815.4865  | 2 | 815.4865  | 0.0001  | 121 | 127 | 0 | 40.64  | 37 |
| 1173.6064 | 2 | 1173.607  | -0.0006 | 191 | 200 | 0 | 73.91  | 38 |
| 1221.6233 | 2 | 1221.6241 | -0.0008 | 149 | 158 | 0 | 58.8   | 37 |
| 1478.7711 | 2 | 1478.7729 | -0.0018 | 147 | 158 | 1 | 72.24  | 37 |
| 1514.7101 | 2 | 1514.7101 | 0       | 354 | 368 | 0 | 122.3  | 36 |
| 1681.8266 | 2 | 1681.8311 | -0.0045 | 88  | 101 | 0 | 88.07  | 37 |
| 1828.9904 | 2 | 1828.9903 | 0.0001  | 312 | 328 | 0 | 148.63 | 35 |
| 1845.8484 | 2 | 1845.8493 | -0.0009 | 159 | 174 | 0 | 48.6   | 35 |
| 2156.0709 | 3 | 2156.0724 | -0.0015 | 129 | 146 | 1 | 46.05  | 37 |
| 2212.1076 | 2 | 2212.1124 | -0.0047 | 332 | 351 | 0 | 101.38 | 37 |
| 766.3868  | 2 | 766.3861  | 0.0007  | 326 | 332 | 0 | 52.94  | 36 |
| 770.44    | 2 | 770.4399  | 0.0002  | 346 | 353 | 0 | 64.99  | 32 |
| 916.5749  | 2 | 916.5746  | 0.0004  | 367 | 374 | 0 | 51.69  | 26 |
| 1206.6238 | 2 | 1206.6245 | -0.0006 | 354 | 366 | 0 | 92.11  | 38 |
| 1210.5998 | 2 | 1210.5983 | 0.0015  | 228 | 237 | 0 | 81.93  | 37 |
| 1359.7045 | 2 | 1359.7068 | -0.0022 | 106 | 116 | 0 | 73.33  | 38 |
| 1407.7135 | 3 | 1407.7147 | -0.0011 | 134 | 145 | 1 | 45.87  | 38 |
| 1445.7338 | 2 | 1445.7343 | -0.0005 | 154 | 165 | 0 | 80.89  | 38 |
| 2047.0124 | 2 | 2047.0085 | 0.004   | 76  | 95  | 0 | 102.9  | 37 |
| 2763.3638 | 2 | 2763.3656 | -0.0018 | 184 | 210 | 0 | 146.13 | 37 |
| 770.44    | 2 | 770.4399  | 0.0002  | 350 | 357 | 0 | 64.99  | 32 |
| 916.5749  | 2 | 916.5746  | 0.0004  | 371 | 378 | 0 | 51.69  | 26 |
| 950.4817  | 2 | 950.4821  | -0.0004 | 246 | 254 | 0 | 43.74  | 38 |
| 1031.5046 | 2 | 1031.5036 | 0.001   | 141 | 149 | 0 | 54.4   | 37 |
| 1181.6074 | 2 | 1181.6081 | -0.0007 | 232 | 241 | 0 | 55.95  | 36 |

|           |   |           |         |     |     |   |        |    |
|-----------|---|-----------|---------|-----|-----|---|--------|----|
| 1190.6278 | 2 | 1190.6295 | -0.0018 | 358 | 370 | 0 | 86.18  | 37 |
| 1227.6128 | 2 | 1227.6136 | -0.0007 | 330 | 340 | 0 | 59.39  | 36 |
| 1359.7045 | 2 | 1359.7068 | -0.0022 | 110 | 120 | 0 | 73.33  | 38 |
| 1401.735  | 2 | 1401.7365 | -0.0015 | 138 | 149 | 1 | 42     | 38 |
| 1445.7338 | 2 | 1445.7343 | -0.0005 | 158 | 169 | 0 | 80.89  | 38 |
| 1468.7487 | 2 | 1468.7497 | -0.0009 | 255 | 267 | 0 | 82.88  | 37 |
| 2049.9822 | 2 | 2048.97   | 1.0123  | 80  | 99  | 0 | 115.27 | 37 |
| 2763.3638 | 2 | 2763.3656 | -0.0018 | 188 | 214 | 0 | 146.13 | 37 |
| 799.529   | 2 | 799.528   | 0.0011  | 64  | 70  | 1 | 31.58  | 29 |
| 975.4407  | 2 | 975.441   | -0.0003 | 21  | 30  | 0 | 80.61  | 33 |
| 1162.59   | 2 | 1162.5903 | -0.0003 | 318 | 328 | 0 | 39.15  | 38 |
| 1191.5222 | 2 | 1191.523  | -0.0008 | 199 | 208 | 0 | 60.65  | 33 |
| 1474.668  | 2 | 1474.6688 | -0.0008 | 362 | 374 | 0 | 71.03  | 34 |
| 1514.7409 | 2 | 1514.7419 | -0.0009 | 87  | 97  | 0 | 52.47  | 37 |
| 1773.8891 | 2 | 1773.8897 | -0.0006 | 241 | 256 | 0 | 115.28 | 38 |
| 1854.9235 | 2 | 1854.9251 | -0.0015 | 218 | 233 | 0 | 120.18 | 37 |
| 1947.8654 | 2 | 1947.8673 | -0.0018 | 71  | 86  | 0 | 72.27  | 33 |
| 1953.0553 | 2 | 1953.0571 | -0.0018 | 98  | 115 | 0 | 84.37  | 34 |
| 2198.0662 | 2 | 2198.0678 | -0.0015 | 294 | 314 | 0 | 121.1  | 37 |
| 3150.634  | 3 | 3150.635  | -0.001  | 150 | 179 | 0 | 84.45  | 34 |
| 3193.5091 | 3 | 3193.5134 | -0.0043 | 259 | 286 | 0 | 58.67  | 36 |
| 856.4766  | 2 | 856.4767  | 0       | 51  | 57  | 0 | 34.76  | 33 |
| 870.4936  | 2 | 870.4923  | 0.0013  | 208 | 215 | 0 | 47.37  | 34 |
| 982.4902  | 2 | 982.4906  | -0.0004 | 197 | 205 | 0 | 65.83  | 35 |
| 1194.5757 | 2 | 1194.5768 | -0.0012 | 112 | 121 | 0 | 74.33  | 37 |
| 1312.6268 | 2 | 1312.6299 | -0.0031 | 78  | 89  | 0 | 69.32  | 36 |
| 1436.7526 | 2 | 1436.7525 | 0.0001  | 255 | 268 | 0 | 64.11  | 36 |
| 1464.7718 | 2 | 1464.7725 | -0.0007 | 95  | 106 | 0 | 84.94  | 37 |
| 1608.7985 | 2 | 1608.7995 | -0.001  | 216 | 231 | 0 | 107.55 | 38 |
| 1916.9259 | 2 | 1916.9264 | -0.0005 | 232 | 247 | 0 | 141.41 | 37 |
| 2772.3867 | 4 | 2771.384  | 1.0027  | 135 | 158 | 0 | 58.14  | 36 |
| 942.5017  | 2 | 942.5022  | -0.0005 | 191 | 198 | 1 | 56.54  | 35 |
| 1069.6387 | 2 | 1069.6383 | 0.0004  | 83  | 92  | 0 | 83.97  | 31 |
| 1247.6868 | 3 | 1247.6874 | -0.0006 | 66  | 77  | 0 | 57.27  | 36 |
| 1299.6823 | 2 | 1299.6823 | 0.0001  | 46  | 56  | 1 | 53.68  | 36 |
| 1302.7431 | 2 | 1302.7435 | -0.0004 | 136 | 146 | 0 | 71.99  | 33 |
| 1309.6128 | 2 | 1309.6125 | 0.0003  | 270 | 280 | 0 | 77.13  | 37 |
| 1379.6386 | 2 | 1379.6391 | -0.0005 | 290 | 302 | 0 | 81.15  | 37 |
| 1493.7467 | 2 | 1493.7474 | -0.0007 | 14  | 26  | 0 | 84.72  | 38 |
| 1512.8287 | 3 | 1512.83   | -0.0013 | 204 | 216 | 0 | 74.47  | 35 |
| 1534.944  | 3 | 1534.9447 | -0.0007 | 162 | 175 | 1 | 43.86  | 20 |
| 1768.8443 | 2 | 1768.8454 | -0.0011 | 147 | 161 | 0 | 63.48  | 37 |
| 2150.1721 | 3 | 2150.1736 | -0.0014 | 57  | 77  | 1 | 59.66  | 32 |
| 2320.2026 | 2 | 2320.2063 | -0.0037 | 93  | 113 | 0 | 114.44 | 36 |
| 797.5135  | 2 | 797.5123  | 0.0012  | 307 | 313 | 0 | 41.94  | 27 |
| 971.5398  | 2 | 971.54    | -0.0002 | 566 | 574 | 0 | 47.75  | 37 |
| 1028.5609 | 2 | 1028.5614 | -0.0005 | 330 | 339 | 0 | 48.46  | 36 |
| 1037.5208 | 2 | 1037.5216 | -0.0007 | 829 | 836 | 0 | 45.77  | 37 |
| 1049.5259 | 2 | 1049.5254 | 0.0005  | 521 | 529 | 0 | 63.24  | 37 |
| 1115.5818 | 2 | 1115.5822 | -0.0004 | 862 | 870 | 0 | 38.97  | 37 |
| 1157.6285 | 2 | 1157.6292 | -0.0006 | 200 | 209 | 0 | 58.28  | 37 |
| 1158.5863 | 2 | 1158.588  | -0.0017 | 506 | 516 | 0 | 95.13  | 37 |
| 1381.7561 | 2 | 1381.7565 | -0.0004 | 288 | 300 | 1 | 70.96  | 34 |
| 1396.73   | 2 | 1396.731  | -0.001  | 236 | 248 | 0 | 55.84  | 36 |
| 1475.7753 | 2 | 1475.7773 | -0.002  | 183 | 196 | 0 | 65.97  | 38 |
| 1511.7162 | 2 | 1511.7177 | -0.0016 | 275 | 287 | 0 | 75.43  | 37 |
| 1891.0386 | 2 | 1891.0415 | -0.0028 | 454 | 470 | 0 | 113.26 | 33 |
| 1958.0367 | 3 | 1958.0374 | -0.0007 | 654 | 672 | 1 | 42.46  | 36 |

|           |   |           |         |      |      |   |        |    |
|-----------|---|-----------|---------|------|------|---|--------|----|
| 1984.9495 | 2 | 1984.9499 | -0.0004 | 743  | 759  | 0 | 100.72 | 37 |
| 2032.1191 | 3 | 2032.1218 | -0.0027 | 210  | 227  | 0 | 51.59  | 32 |
| 2507.3751 | 3 | 2507.3748 | 0.0003  | 136  | 160  | 0 | 88.48  | 31 |
| 3815.0467 | 4 | 3815.0468 | -0.0002 | 385  | 421  | 1 | 28.78  | 28 |
| 865.5134  | 2 | 865.5134  | 0       | 349  | 355  | 0 | 36.15  | 30 |
| 1129.5795 | 2 | 1129.5801 | -0.0007 | 319  | 328  | 0 | 37.12  | 36 |
| 1157.6439 | 2 | 1157.6445 | -0.0005 | 206  | 217  | 0 | 43.33  | 37 |
| 1194.5516 | 2 | 1194.5517 | -0.0001 | 371  | 381  | 0 | 63.69  | 36 |
| 1294.6351 | 2 | 1294.634  | 0.0012  | 223  | 234  | 0 | 63.34  | 37 |
| 1304.6575 | 2 | 1304.6581 | -0.0005 | 382  | 393  | 0 | 74.08  | 38 |
| 1643.8692 | 2 | 1643.8705 | -0.0013 | 235  | 250  | 0 | 67.14  | 37 |
| 1864.0138 | 3 | 1864.0128 | 0.001   | 178  | 193  | 0 | 52.71  | 34 |
| 1885.8933 | 2 | 1885.8945 | -0.0012 | 140  | 155  | 0 | 77.02  | 37 |
| 1982.9245 | 2 | 1982.9255 | -0.001  | 293  | 309  | 0 | 147.29 | 37 |
| 2256.06   | 3 | 2256.0658 | -0.0058 | 395  | 414  | 0 | 72.97  | 36 |
| 2268.0083 | 3 | 2268.0103 | -0.002  | 158  | 177  | 1 | 71.28  | 34 |
| 3831.796  | 3 | 3830.8044 | 0.9916  | 68   | 101  | 0 | 52.04  | 34 |
| 792.4502  | 2 | 792.4494  | 0.0008  | 365  | 371  | 0 | 43.45  | 34 |
| 1130.4635 | 2 | 1130.4629 | 0.0006  | 584  | 594  | 0 | 35.72  | 28 |
| 1158.4947 | 2 | 1158.4942 | 0.0005  | 602  | 613  | 0 | 43.2   | 31 |
| 1186.6957 | 2 | 1186.6962 | -0.0004 | 155  | 165  | 0 | 45.41  | 33 |
| 1213.5401 | 2 | 1213.5397 | 0.0004  | 482  | 493  | 0 | 65.79  | 34 |
| 1260.6699 | 2 | 1260.6714 | -0.0015 | 471  | 481  | 0 | 42.07  | 38 |
| 1499.6773 | 2 | 1499.6787 | -0.0014 | 375  | 387  | 0 | 101.77 | 35 |
| 1597.8201 | 3 | 1597.8213 | -0.0011 | 396  | 410  | 0 | 42.04  | 36 |
| 1719.7403 | 2 | 1719.7419 | -0.0016 | 283  | 296  | 0 | 56.49  | 32 |
| 1814.9051 | 2 | 1814.905  | 0.0001  | 319  | 335  | 0 | 89.32  | 37 |
| 1889.9351 | 2 | 1889.9371 | -0.002  | 302  | 318  | 0 | 130.75 | 38 |
| 2409.1274 | 2 | 2409.1304 | -0.003  | 200  | 221  | 0 | 77.09  | 36 |
| 2427.2338 | 2 | 2427.2381 | -0.0042 | 93   | 117  | 0 | 86.34  | 37 |
| 2583.3372 | 3 | 2583.3392 | -0.002  | 92   | 117  | 1 | 57.71  | 35 |
| 832.4809  | 2 | 832.4807  | 0.0002  | 1742 | 1749 | 0 | 52.98  | 37 |
| 1005.5468 | 2 | 1005.5495 | -0.0026 | 616  | 624  | 0 | 36.02  | 35 |
| 1070.5216 | 2 | 1070.5219 | -0.0003 | 1508 | 1515 | 0 | 42.41  | 35 |
| 1101.5923 | 2 | 1101.5931 | -0.0008 | 629  | 638  | 0 | 64.34  | 38 |
| 1279.7854 | 2 | 1279.7864 | -0.001  | 802  | 814  | 0 | 90.91  | 25 |
| 1316.7085 | 2 | 1316.7122 | -0.0038 | 539  | 550  | 0 | 46.38  | 37 |
| 1432.7145 | 2 | 1432.7158 | -0.0012 | 71   | 84   | 0 | 123.04 | 38 |
| 1704.8498 | 2 | 1704.8505 | -0.0007 | 1271 | 1284 | 0 | 120.9  | 38 |
| 2336.1514 | 2 | 2336.1536 | -0.0021 | 1401 | 1421 | 0 | 131.09 | 37 |
| 2411.2056 | 2 | 2411.193  | 0.0126  | 1008 | 1029 | 0 | 97.16  | 37 |
| 3381.5092 | 3 | 3381.5116 | -0.0024 | 753  | 781  | 0 | 48.15  | 32 |
| 1151.7065 | 2 | 1151.7067 | -0.0002 | 157  | 167  | 0 | 74.04  | 24 |
| 1696.7544 | 2 | 1696.754  | 0.0004  | 73   | 87   | 0 | 99.93  | 34 |
| 1795.7963 | 2 | 1795.7975 | -0.0012 | 378  | 392  | 0 | 61.42  | 34 |
| 2149.1232 | 2 | 2149.1242 | -0.0009 | 278  | 296  | 0 | 142.92 | 36 |
| 2346.1794 | 2 | 2346.1815 | -0.0021 | 410  | 432  | 0 | 161.67 | 37 |
| 2822.444  | 3 | 2822.4491 | -0.0051 | 325  | 349  | 1 | 89.9   | 36 |
| 1018.5031 | 2 | 1018.5043 | -0.0013 | 805  | 815  | 0 | 81.41  | 39 |
| 1047.5355 | 2 | 1047.5349 | 0.0006  | 469  | 477  | 1 | 45.78  | 38 |
| 1186.6301 | 2 | 1186.6306 | -0.0005 | 575  | 585  | 0 | 68.24  | 38 |
| 1276.7016 | 2 | 1276.7027 | -0.0011 | 779  | 789  | 0 | 60.5   | 36 |
| 1282.6156 | 2 | 1282.6162 | -0.0006 | 543  | 553  | 0 | 65.12  | 36 |
| 1302.7082 | 2 | 1302.7085 | -0.0003 | 352  | 362  | 0 | 89.16  | 37 |
| 1423.7565 | 2 | 1423.7567 | -0.0002 | 478  | 489  | 0 | 59.66  | 35 |
| 1442.7748 | 2 | 1442.7769 | -0.0022 | 261  | 272  | 0 | 68.68  | 36 |
| 1461.7609 | 2 | 1461.7616 | -0.0007 | 683  | 694  | 0 | 92.59  | 38 |
| 1643.935  | 2 | 1643.9354 | -0.0004 | 310  | 323  | 0 | 76.56  | 31 |

|           |   |           |         |     |     |   |        |    |
|-----------|---|-----------|---------|-----|-----|---|--------|----|
| 1835.9332 | 2 | 1835.9339 | -0.0007 | 112 | 127 | 0 | 86.09  | 38 |
| 2484.2101 | 3 | 2484.2107 | -0.0006 | 385 | 404 | 1 | 97.14  | 37 |
| 971.5655  | 2 | 971.5651  | 0.0003  | 253 | 261 | 0 | 47.9   | 36 |
| 1189.6334 | 2 | 1189.6343 | -0.0009 | 224 | 235 | 0 | 38.34  | 37 |
| 1236.645  | 2 | 1236.6462 | -0.0012 | 241 | 252 | 0 | 62.86  | 37 |
| 1286.7001 | 2 | 1286.7016 | -0.0015 | 400 | 411 | 0 | 59.01  | 37 |
| 1750.8556 | 2 | 1750.856  | -0.0004 | 311 | 325 | 0 | 131.12 | 38 |
| 2142.0299 | 3 | 2142.0303 | -0.0004 | 71  | 87  | 1 | 64.09  | 37 |
| 2144.099  | 2 | 2144.1001 | -0.001  | 182 | 201 | 0 | 125.32 | 37 |
| 2189.1302 | 2 | 2189.1324 | -0.0021 | 159 | 178 | 0 | 81.86  | 36 |
| 2203.129  | 2 | 2203.126  | 0.003   | 276 | 296 | 0 | 96.81  | 37 |
| 1028.5609 | 2 | 1028.5614 | -0.0005 | 309 | 318 | 0 | 48.46  | 36 |
| 1037.5208 | 2 | 1037.5216 | -0.0007 | 808 | 815 | 0 | 45.77  | 37 |
| 1115.5818 | 2 | 1115.5822 | -0.0004 | 841 | 849 | 0 | 38.97  | 37 |
| 1157.6285 | 2 | 1157.6292 | -0.0006 | 180 | 189 | 0 | 58.28  | 37 |
| 1158.5863 | 2 | 1158.588  | -0.0017 | 485 | 495 | 0 | 95.13  | 37 |
| 1381.7561 | 2 | 1381.7565 | -0.0004 | 267 | 279 | 1 | 70.96  | 34 |
| 1396.73   | 2 | 1396.731  | -0.001  | 216 | 228 | 0 | 55.84  | 36 |
| 1425.6529 | 2 | 1425.6525 | 0.0004  | 854 | 866 | 0 | 62.69  | 36 |
| 1475.7753 | 2 | 1475.7773 | -0.002  | 163 | 176 | 0 | 65.97  | 38 |
| 1511.7162 | 2 | 1511.7177 | -0.0016 | 254 | 266 | 0 | 75.43  | 37 |
| 1958.0367 | 3 | 1958.0374 | -0.0007 | 633 | 651 | 1 | 42.46  | 36 |
| 1984.9495 | 2 | 1984.9499 | -0.0004 | 722 | 738 | 0 | 100.72 | 37 |
| 2032.1191 | 3 | 2032.1218 | -0.0027 | 190 | 207 | 0 | 51.59  | 32 |
| 2507.3751 | 3 | 2507.3748 | 0.0003  | 116 | 140 | 0 | 88.48  | 31 |
| 3815.0467 | 4 | 3815.0468 | -0.0002 | 364 | 400 | 1 | 28.78  | 28 |
| 932.461   | 2 | 932.4603  | 0.0007  | 411 | 418 | 0 | 39.67  | 38 |
| 1090.5912 | 2 | 1090.591  | 0.0001  | 496 | 504 | 0 | 39.43  | 36 |
| 1160.5725 | 2 | 1160.5727 | -0.0002 | 290 | 299 | 0 | 50.6   | 37 |
| 1162.634  | 2 | 1162.6346 | -0.0006 | 395 | 403 | 1 | 39.17  | 36 |
| 1198.6339 | 2 | 1198.6346 | -0.0007 | 280 | 289 | 0 | 48.69  | 35 |
| 1332.7105 | 2 | 1332.7112 | -0.0006 | 219 | 230 | 0 | 59.37  | 37 |
| 1608.8708 | 2 | 1608.8722 | -0.0014 | 310 | 324 | 0 | 67.77  | 35 |
| 1701.7291 | 2 | 1701.7304 | -0.0013 | 258 | 273 | 0 | 103.23 | 31 |
| 1719.8654 | 2 | 1719.8679 | -0.0024 | 516 | 530 | 0 | 117.35 | 38 |
| 1970.0458 | 3 | 1970.0473 | -0.0015 | 478 | 495 | 0 | 52.31  | 35 |
| 2196.1002 | 2 | 2196.1022 | -0.002  | 197 | 218 | 0 | 100.66 | 37 |
| 2656.3417 | 3 | 2656.3418 | -0.0001 | 365 | 386 | 0 | 69.27  | 37 |
| 2782.3846 | 3 | 2782.3847 | -0.0001 | 326 | 353 | 0 | 74.25  | 37 |
| 2910.4793 | 3 | 2910.4797 | -0.0004 | 325 | 353 | 1 | 47.62  | 36 |
| 983.5645  | 2 | 983.5651  | -0.0006 | 96  | 105 | 0 | 49.11  | 32 |
| 1247.6756 | 2 | 1247.6761 | -0.0006 | 393 | 403 | 0 | 79.1   | 36 |
| 1248.5573 | 2 | 1248.5582 | -0.0009 | 547 | 558 | 0 | 49.76  | 34 |
| 1255.6107 | 2 | 1255.6118 | -0.0011 | 173 | 183 | 1 | 62.72  | 36 |
| 1293.5753 | 2 | 1293.5758 | -0.0005 | 618 | 629 | 0 | 52.64  | 34 |
| 1360.7351 | 2 | 1360.7351 | 0       | 160 | 172 | 0 | 60.43  | 37 |
| 1432.7226 | 2 | 1432.7232 | -0.0006 | 377 | 389 | 0 | 75.39  | 38 |
| 1476.7554 | 2 | 1476.7573 | -0.0018 | 107 | 120 | 0 | 76.06  | 38 |
| 1812.9469 | 2 | 1812.9469 | 0       | 601 | 617 | 0 | 122.26 | 36 |
| 1821.8923 | 2 | 1821.8931 | -0.0007 | 218 | 234 | 0 | 76.91  | 38 |
| 1838.8845 | 2 | 1838.8833 | 0.0012  | 467 | 483 | 0 | 79.22  | 37 |
| 743.3751  | 2 | 743.3755  | -0.0004 | 392 | 397 | 0 | 35.21  | 33 |
| 764.4068  | 2 | 764.4069  | -0.0001 | 233 | 239 | 0 | 36.11  | 36 |
| 905.4609  | 2 | 905.4607  | 0.0002  | 558 | 565 | 0 | 40.4   | 38 |
| 1038.6541 | 2 | 1038.655  | -0.0008 | 151 | 159 | 1 | 29.12  | 24 |
| 1248.7176 | 2 | 1248.719  | -0.0014 | 712 | 722 | 1 | 36     | 32 |
| 1451.6831 | 2 | 1451.6834 | -0.0003 | 244 | 255 | 0 | 73.23  | 37 |
| 1517.6656 | 2 | 1517.6668 | -0.0011 | 593 | 606 | 0 | 107.56 | 32 |

|           |   |           |         |      |      |   |        |    |
|-----------|---|-----------|---------|------|------|---|--------|----|
| 1566.7236 | 2 | 1566.7236 | 0.0001  | 544  | 557  | 0 | 76.49  | 36 |
| 1798.9198 | 2 | 1798.9254 | -0.0056 | 771  | 786  | 0 | 59.37  | 37 |
| 2256.1954 | 2 | 2256.1961 | -0.0007 | 33   | 55   | 0 | 115.47 | 35 |
| 2398.1526 | 3 | 2398.1553 | -0.0026 | 349  | 368  | 1 | 41.25  | 37 |
| 2931.4244 | 3 | 2931.425  | -0.0006 | 94   | 120  | 0 | 118.48 | 37 |
| 1251.7544 | 2 | 1251.7551 | -0.0007 | 277  | 288  | 0 | 80.89  | 27 |
| 1368.624  | 2 | 1368.6245 | -0.0005 | 220  | 230  | 0 | 47.83  | 35 |
| 1548.85   | 2 | 1548.8512 | -0.0011 | 105  | 119  | 0 | 98.7   | 34 |
| 1613.9068 | 2 | 1613.9062 | 0.0006  | 428  | 441  | 0 | 108.33 | 33 |
| 1668.821  | 2 | 1668.822  | -0.001  | 176  | 191  | 0 | 136.24 | 37 |
| 2006.2038 | 3 | 2006.204  | -0.0003 | 289  | 306  | 0 | 68.36  | 22 |
| 3066.3748 | 3 | 3066.3764 | -0.0016 | 250  | 276  | 0 | 58.68  | 33 |
| 1171.5891 | 2 | 1171.5907 | -0.0016 | 81   | 90   | 0 | 37.99  | 35 |
| 1192.6554 | 2 | 1192.6564 | -0.001  | 138  | 147  | 0 | 58.62  | 35 |
| 1216.5975 | 2 | 1216.5989 | -0.0014 | 321  | 330  | 0 | 53.61  | 36 |
| 1279.623  | 2 | 1279.6231 | 0       | 207  | 217  | 0 | 78.36  | 37 |
| 1422.6565 | 2 | 1422.6568 | -0.0002 | 183  | 193  | 0 | 74.74  | 36 |
| 1482.8142 | 2 | 1482.8155 | -0.0013 | 102  | 116  | 0 | 107.84 | 34 |
| 1585.8677 | 2 | 1585.8684 | -0.0007 | 306  | 320  | 0 | 59.91  | 36 |
| 1802.9248 | 2 | 1802.9262 | -0.0014 | 348  | 365  | 0 | 62.06  | 37 |
| 2032.0659 | 3 | 2032.0688 | -0.003  | 346  | 365  | 1 | 47.71  | 37 |
| 2275.168  | 2 | 2275.1671 | 0.001   | 118  | 137  | 0 | 76.42  | 37 |
| 1241.6423 | 2 | 1241.6438 | -0.0015 | 80   | 90   | 0 | 56.41  | 35 |
| 1934.0261 | 2 | 1934.0262 | 0       | 180  | 197  | 0 | 114.26 | 36 |
| 2430.232  | 2 | 2430.2319 | 0.0002  | 249  | 271  | 0 | 100.28 | 37 |
| 2483.216  | 2 | 2483.2166 | -0.0006 | 91   | 113  | 0 | 126.7  | 37 |
| 2812.4985 | 3 | 2812.5011 | -0.0025 | 246  | 271  | 1 | 54.96  | 33 |
| 2945.4675 | 3 | 2945.4692 | -0.0017 | 219  | 245  | 0 | 98.86  | 36 |
| 4101.0821 | 4 | 4101.0866 | -0.0045 | 124  | 164  | 1 | 33.86  | 33 |
| 919.479   | 2 | 919.4797  | -0.0007 | 43   | 52   | 0 | 51.29  | 38 |
| 940.5019  | 2 | 940.5018  | 0.0001  | 63   | 70   | 0 | 41.23  | 34 |
| 1438.6787 | 2 | 1438.6801 | -0.0013 | 27   | 42   | 0 | 118.74 | 37 |
| 1514.7201 | 2 | 1514.7212 | -0.0011 | 76   | 89   | 0 | 137.56 | 36 |
| 2155.0158 | 2 | 2155.0181 | -0.0023 | 71   | 89   | 1 | 94.69  | 37 |
| 1099.6601 | 2 | 1099.6601 | 0.0001  | 721  | 731  | 0 | 62.22  | 33 |
| 1232.6173 | 2 | 1232.6183 | -0.001  | 623  | 633  | 0 | 55.36  | 38 |
| 1247.5814 | 2 | 1247.5816 | -0.0001 | 579  | 589  | 0 | 55.89  | 36 |
| 1257.6962 | 2 | 1257.6969 | -0.0007 | 875  | 886  | 0 | 39.61  | 36 |
| 1276.6657 | 2 | 1276.6663 | -0.0006 | 318  | 330  | 0 | 67.23  | 37 |
| 1280.6179 | 2 | 1280.6183 | -0.0004 | 331  | 341  | 0 | 65.34  | 37 |
| 1363.672  | 2 | 1363.6732 | -0.0011 | 1007 | 1019 | 0 | 77.1   | 38 |
| 1405.5694 | 2 | 1405.5708 | -0.0014 | 534  | 545  | 0 | 33.66  | 27 |
| 1554.8605 | 2 | 1554.8617 | -0.0012 | 763  | 777  | 0 | 96.14  | 33 |
| 2202.1314 | 3 | 2201.1289 | 1.0025  | 740  | 759  | 0 | 70.04  | 37 |
| 2488.3173 | 3 | 2488.3173 | 0       | 385  | 407  | 0 | 80.49  | 34 |
| 974.5543  | 2 | 974.5549  | -0.0006 | 227  | 237  | 0 | 42.36  | 36 |
| 1172.655  | 2 | 1172.6554 | -0.0004 | 214  | 223  | 0 | 42.91  | 37 |
| 1277.6285 | 2 | 1277.6286 | 0       | 135  | 146  | 0 | 56.21  | 38 |
| 1392.8079 | 2 | 1392.8089 | -0.001  | 150  | 163  | 0 | 44.76  | 28 |
| 1424.7664 | 2 | 1424.7664 | 0       | 309  | 321  | 0 | 104.32 | 35 |
| 1456.8326 | 2 | 1456.8323 | 0.0003  | 238  | 250  | 0 | 83.24  | 33 |
| 1491.767  | 2 | 1491.7681 | -0.0011 | 338  | 351  | 0 | 122.1  | 38 |
| 1863.9361 | 2 | 1863.9367 | -0.0006 | 322  | 337  | 0 | 86.93  | 38 |
| 2687.3679 | 3 | 2687.3687 | -0.0008 | 460  | 483  | 1 | 55.65  | 36 |
| 856.4766  | 2 | 856.4767  | 0       | 51   | 57   | 0 | 34.76  | 33 |
| 870.4936  | 2 | 870.4923  | 0.0013  | 208  | 215  | 0 | 47.37  | 34 |
| 948.5392  | 2 | 948.5392  | 0       | 197  | 205  | 0 | 78.23  | 35 |
| 1073.5345 | 2 | 1073.5353 | -0.0007 | 276  | 286  | 0 | 54.63  | 37 |

|           |   |           |         |     |     |   |        |    |
|-----------|---|-----------|---------|-----|-----|---|--------|----|
| 1218.6476 | 2 | 1218.6496 | -0.002  | 112 | 121 | 0 | 66.88  | 38 |
| 1393.745  | 2 | 1393.7466 | -0.0017 | 255 | 268 | 0 | 47.7   | 36 |
| 1407.7507 | 2 | 1407.7511 | -0.0003 | 95  | 106 | 0 | 107.46 | 36 |
| 1574.83   | 2 | 1574.8304 | -0.0005 | 216 | 231 | 0 | 76.53  | 37 |
| 1966.8723 | 2 | 1966.8727 | -0.0004 | 232 | 247 | 0 | 88.54  | 34 |
| 2735.3338 | 3 | 2735.3364 | -0.0026 | 135 | 158 | 0 | 66.12  | 37 |
| 718.4378  | 2 | 718.4377  | 0.0001  | 377 | 383 | 0 | 34.83  | 30 |
| 896.5694  | 2 | 896.5695  | 0       | 348 | 356 | 0 | 30.86  | 26 |
| 1158.4947 | 2 | 1158.4942 | 0.0005  | 596 | 607 | 0 | 43.2   | 31 |
| 1183.5292 | 2 | 1183.5292 | 0       | 494 | 505 | 0 | 87.24  | 34 |
| 1186.6957 | 2 | 1186.6962 | -0.0004 | 167 | 177 | 0 | 45.41  | 33 |
| 1483.6827 | 3 | 1483.6838 | -0.001  | 387 | 399 | 0 | 61.09  | 36 |
| 1536.8355 | 3 | 1536.8372 | -0.0017 | 457 | 470 | 1 | 47.6   | 35 |
| 1547.794  | 2 | 1547.7944 | -0.0004 | 408 | 422 | 0 | 95.5   | 38 |
| 1719.7403 | 2 | 1719.7419 | -0.0016 | 295 | 308 | 0 | 56.49  | 32 |
| 1795.7387 | 2 | 1795.7398 | -0.0011 | 569 | 588 | 0 | 89.33  | 28 |
| 1903.9505 | 2 | 1903.9527 | -0.0022 | 314 | 330 | 0 | 55.44  | 38 |
| 2409.1274 | 2 | 2409.1304 | -0.003  | 212 | 233 | 0 | 77.09  | 36 |
| 1290.7433 | 2 | 1290.7435 | -0.0001 | 285 | 295 | 0 | 80.5   | 31 |
| 1442.7975 | 2 | 1442.7981 | -0.0005 | 621 | 633 | 0 | 69.96  | 35 |
| 1770.0252 | 2 | 1770.0251 | 0.0001  | 296 | 312 | 0 | 139.02 | 29 |
| 1892.9189 | 2 | 1892.919  | -0.0001 | 492 | 507 | 0 | 91.23  | 38 |
| 1924.0186 | 2 | 1924.0193 | -0.0007 | 221 | 236 | 0 | 116.46 | 35 |
| 2526.147  | 3 | 2526.1481 | -0.0012 | 349 | 370 | 0 | 53.32  | 35 |
| 959.5802  | 2 | 959.5804  | -0.0002 | 711 | 718 | 0 | 45.47  | 32 |
| 1005.5619 | 2 | 1005.5607 | 0.0011  | 927 | 935 | 0 | 49.73  | 36 |
| 1035.5494 | 2 | 1035.5502 | -0.0008 | 771 | 779 | 0 | 55.09  | 36 |
| 1132.6488 | 2 | 1132.6492 | -0.0004 | 729 | 738 | 0 | 62.23  | 33 |
| 1485.8398 | 2 | 1485.8402 | -0.0005 | 109 | 122 | 0 | 102.34 | 34 |
| 1746.8877 | 2 | 1746.89   | -0.0023 | 32  | 48  | 0 | 105.24 | 38 |
| 1913.96   | 2 | 1913.9597 | 0.0003  | 181 | 196 | 0 | 89.47  | 37 |
| 2460.2712 | 2 | 2460.2723 | -0.001  | 6   | 26  | 0 | 98.96  | 36 |
| 1023.472  | 2 | 1023.4729 | -0.0009 | 185 | 192 | 0 | 40.01  | 36 |
| 1076.5168 | 2 | 1076.5172 | -0.0004 | 246 | 255 | 0 | 55.24  | 37 |
| 1277.6177 | 2 | 1277.6187 | -0.0009 | 348 | 358 | 0 | 84.47  | 38 |
| 1932.925  | 2 | 1932.9285 | -0.0034 | 268 | 285 | 0 | 122.24 | 37 |
| 2201.0886 | 2 | 2201.0892 | -0.0006 | 314 | 332 | 0 | 141.56 | 37 |
| 3373.5715 | 3 | 3372.5721 | 0.9993  | 193 | 222 | 0 | 72.77  | 35 |
| 989.5538  | 2 | 989.5546  | -0.0008 | 693 | 700 | 0 | 57.47  | 36 |
| 1041.4875 | 2 | 1041.488  | -0.0005 | 364 | 372 | 0 | 43.08  | 34 |
| 1235.634  | 2 | 1235.6333 | 0.0007  | 388 | 397 | 0 | 60.62  | 38 |
| 1255.6444 | 2 | 1255.6448 | -0.0004 | 589 | 598 | 0 | 66.5   | 35 |
| 1324.6733 | 3 | 1324.6735 | -0.0002 | 412 | 422 | 1 | 50.67  | 37 |
| 1469.7869 | 2 | 1469.7878 | -0.0009 | 143 | 156 | 0 | 72.83  | 36 |
| 1644.8247 | 2 | 1644.8253 | -0.0007 | 442 | 459 | 0 | 97.66  | 38 |
| 1648.787  | 2 | 1648.7879 | -0.0008 | 258 | 272 | 0 | 89.4   | 37 |
| 1664.8403 | 2 | 1664.841  | -0.0006 | 677 | 692 | 0 | 109.36 | 38 |
| 1715.9179 | 3 | 1715.9206 | -0.0027 | 320 | 334 | 0 | 43.72  | 36 |
| 1145.5928 | 2 | 1145.5928 | 0       | 119 | 130 | 0 | 59.71  | 38 |
| 1237.5753 | 2 | 1237.5761 | -0.0009 | 544 | 554 | 0 | 46.74  | 37 |
| 1656.8131 | 2 | 1656.8141 | -0.001  | 181 | 195 | 0 | 70.7   | 37 |
| 1729.8259 | 2 | 1729.8271 | -0.0013 | 517 | 532 | 0 | 100.29 | 37 |
| 2165.0904 | 2 | 2165.0926 | -0.0021 | 427 | 446 | 0 | 114.55 | 37 |
| 2679.3395 | 3 | 2679.3405 | -0.0011 | 486 | 510 | 0 | 71.3   | 37 |
| 1378.7092 | 2 | 1378.7092 | 0       | 376 | 389 | 0 | 102.85 | 38 |
| 1400.7219 | 2 | 1400.7259 | -0.004  | 285 | 299 | 0 | 54.21  | 37 |
| 1545.7809 | 2 | 1545.7821 | -0.0012 | 319 | 332 | 0 | 111.94 | 38 |
| 1617.8544 | 2 | 1617.8548 | -0.0005 | 408 | 422 | 0 | 50.85  | 37 |

|           |   |           |         |      |      |   |        |    |
|-----------|---|-----------|---------|------|------|---|--------|----|
| 2156.9842 | 2 | 2156.9862 | -0.002  | 356  | 375  | 0 | 136.26 | 35 |
| 3039.4885 | 3 | 3038.4873 | 1.0012  | 164  | 191  | 1 | 71.76  | 36 |
| 815.4865  | 2 | 815.4865  | 0.0001  | 121  | 127  | 0 | 40.64  | 37 |
| 1173.6064 | 2 | 1173.607  | -0.0006 | 191  | 200  | 0 | 73.91  | 38 |
| 1221.6233 | 2 | 1221.6241 | -0.0008 | 149  | 158  | 0 | 58.8   | 37 |
| 1478.7711 | 2 | 1478.7729 | -0.0018 | 147  | 158  | 1 | 72.24  | 37 |
| 1514.7101 | 2 | 1514.7101 | 0       | 354  | 368  | 0 | 122.3  | 36 |
| 1799.9296 | 2 | 1799.9305 | -0.001  | 46   | 63   | 0 | 68.6   | 37 |
| 1821.9571 | 3 | 1821.9584 | -0.0013 | 335  | 351  | 0 | 41.03  | 36 |
| 2156.0709 | 3 | 2156.0724 | -0.0015 | 129  | 146  | 1 | 46.05  | 37 |
| 1088.6214 | 2 | 1088.623  | -0.0016 | 118  | 127  | 0 | 82.65  | 34 |
| 1102.605  | 2 | 1102.6056 | -0.0007 | 20   | 30   | 0 | 67.51  | 38 |
| 1564.7522 | 2 | 1564.7522 | 0       | 60   | 73   | 0 | 109.83 | 38 |
| 1645.7611 | 2 | 1645.7617 | -0.0006 | 128  | 142  | 0 | 89.25  | 36 |
| 2105.0823 | 3 | 2105.0827 | -0.0003 | 110  | 127  | 1 | 62.42  | 37 |
| 2152.0323 | 3 | 2152.0338 | -0.0015 | 80   | 97   | 0 | 79.56  | 37 |
| 2322.2334 | 2 | 2322.2359 | -0.0024 | 39   | 59   | 0 | 66.32  | 35 |
| 737.4798  | 2 | 737.48    | -0.0001 | 168  | 174  | 1 | 28.34  | 24 |
| 930.5384  | 2 | 930.5386  | -0.0002 | 204  | 212  | 0 | 42     | 36 |
| 1157.6439 | 2 | 1157.6445 | -0.0005 | 175  | 186  | 0 | 43.33  | 37 |
| 1272.6346 | 2 | 1272.635  | -0.0004 | 329  | 339  | 0 | 63.12  | 37 |
| 1275.6832 | 2 | 1275.6823 | 0.0009  | 192  | 203  | 0 | 53.6   | 37 |
| 1311.5785 | 2 | 1311.5805 | -0.002  | 366  | 375  | 0 | 38.33  | 34 |
| 1391.7508 | 2 | 1391.7516 | -0.0009 | 104  | 115  | 0 | 84.33  | 36 |
| 1397.6426 | 2 | 1397.6431 | -0.0006 | 351  | 362  | 0 | 70.08  | 35 |
| 1935.9605 | 2 | 1935.9612 | -0.0007 | 262  | 278  | 0 | 97.21  | 38 |
| 2222.2021 | 3 | 2222.2019 | 0.0002  | 55   | 74   | 1 | 69.97  | 33 |
| 960.528   | 2 | 960.528   | 0       | 94   | 102  | 0 | 67.46  | 37 |
| 1239.6246 | 2 | 1239.6248 | -0.0001 | 206  | 215  | 0 | 54.72  | 37 |
| 1395.7294 | 3 | 1395.7299 | -0.0005 | 351  | 362  | 0 | 37.43  | 36 |
| 1402.7099 | 2 | 1402.7126 | -0.0027 | 324  | 336  | 0 | 80.23  | 37 |
| 1601.7015 | 2 | 1601.7032 | -0.0017 | 385  | 399  | 0 | 74.34  | 32 |
| 1716.8851 | 2 | 1716.8869 | -0.0018 | 113  | 126  | 0 | 102.64 | 38 |
| 1927.9847 | 2 | 1927.9859 | -0.0012 | 292  | 310  | 0 | 93.04  | 37 |
| 2931.4203 | 3 | 2931.418  | 0.0023  | 167  | 191  | 1 | 46.65  | 37 |
| 799.529   | 2 | 799.528   | 0.0011  | 64   | 70   | 1 | 31.58  | 29 |
| 975.4407  | 2 | 975.441   | -0.0003 | 21   | 30   | 0 | 80.61  | 33 |
| 1013.4738 | 2 | 1013.4739 | -0.0001 | 186  | 193  | 0 | 42.11  | 34 |
| 1162.59   | 2 | 1162.5903 | -0.0003 | 318  | 328  | 0 | 39.15  | 38 |
| 1514.7409 | 2 | 1514.7419 | -0.0009 | 87   | 97   | 0 | 52.47  | 37 |
| 1947.8654 | 2 | 1947.8673 | -0.0018 | 71   | 86   | 0 | 72.27  | 33 |
| 1953.0553 | 2 | 1953.0571 | -0.0018 | 98   | 115  | 0 | 84.37  | 34 |
| 2212.0816 | 2 | 2212.0834 | -0.0018 | 294  | 314  | 0 | 107.96 | 37 |
| 3150.634  | 3 | 3150.635  | -0.001  | 150  | 179  | 0 | 84.45  | 34 |
| 996.6331  | 2 | 996.6331  | 0       | 509  | 517  | 0 | 35.23  | 25 |
| 1165.5977 | 2 | 1165.5979 | -0.0002 | 40   | 50   | 0 | 59.83  | 37 |
| 1301.7937 | 2 | 1301.7959 | -0.0022 | 1057 | 1068 | 0 | 49.52  | 24 |
| 2169.1866 | 2 | 2169.1874 | -0.0008 | 705  | 723  | 0 | 53.93  | 33 |
| 2176.1296 | 2 | 2176.131  | -0.0014 | 204  | 223  | 0 | 96.72  | 36 |
| 2198.0995 | 3 | 2197.095  | 1.0045  | 416  | 434  | 0 | 39.87  | 37 |
| 2379.1238 | 2 | 2379.1246 | -0.0007 | 874  | 893  | 0 | 43.57  | 37 |
| 2503.2458 | 2 | 2503.2476 | -0.0017 | 270  | 292  | 0 | 77.02  | 37 |
| 2590.2312 | 3 | 2590.2333 | -0.0021 | 518  | 541  | 0 | 59.67  | 37 |
| 2783.3719 | 4 | 2783.3739 | -0.002  | 437  | 461  | 0 | 40.84  | 37 |
| 2798.5226 | 3 | 2798.5218 | 0.0008  | 159  | 183  | 0 | 52.12  | 31 |
| 897.4921  | 2 | 897.492   | 0.0001  | 24   | 31   | 0 | 52.09  | 33 |
| 1169.5958 | 2 | 1169.5968 | -0.001  | 178  | 187  | 0 | 57.22  | 35 |
| 1239.6971 | 2 | 1239.6975 | -0.0005 | 40   | 49   | 0 | 44.79  | 33 |

|           |   |           |         |      |      |   |        |    |
|-----------|---|-----------|---------|------|------|---|--------|----|
| 1374.7531 | 2 | 1374.7541 | -0.0009 | 128  | 139  | 1 | 78.53  | 36 |
| 1581.8469 | 2 | 1581.8475 | -0.0006 | 75   | 89   | 0 | 78.98  | 35 |
| 1791.8936 | 3 | 1791.8944 | -0.0008 | 97   | 113  | 0 | 42.57  | 37 |
| 1864.933  | 2 | 1864.934  | -0.001  | 3    | 19   | 0 | 114.42 | 37 |
| 1866.9832 | 3 | 1866.9839 | -0.0008 | 40   | 55   | 1 | 38.21  | 36 |
| 1914.01   | 3 | 1913.0106 | 0.9995  | 143  | 159  | 1 | 69.24  | 36 |
| 1159.6518 | 2 | 1159.6522 | -0.0005 | 282  | 291  | 0 | 67.92  | 35 |
| 1182.6238 | 2 | 1182.6244 | -0.0007 | 433  | 443  | 0 | 82.74  | 35 |
| 1206.6605 | 2 | 1206.6608 | -0.0003 | 373  | 383  | 0 | 85.6   | 36 |
| 1259.6759 | 2 | 1259.6761 | -0.0002 | 468  | 478  | 0 | 82.68  | 37 |
| 1329.7054 | 2 | 1329.7075 | -0.0021 | 234  | 246  | 0 | 93.5   | 38 |
| 1527.8496 | 2 | 1527.8508 | -0.0012 | 135  | 150  | 0 | 53.82  | 34 |
| 3610.7128 | 3 | 3610.7131 | -0.0003 | 309  | 341  | 1 | 50.96  | 36 |
| 856.512   | 2 | 856.513   | -0.0011 | 545  | 551  | 0 | 36.42  | 33 |
| 983.5645  | 2 | 983.5651  | -0.0006 | 101  | 110  | 0 | 49.11  | 32 |
| 1129.5607 | 2 | 1129.5615 | -0.0008 | 613  | 622  | 0 | 57.04  | 35 |
| 1189.6704 | 2 | 1189.6707 | -0.0003 | 398  | 408  | 0 | 75.9   | 35 |
| 1234.5669 | 2 | 1234.5677 | -0.0008 | 552  | 563  | 0 | 69.96  | 36 |
| 1255.6107 | 2 | 1255.6118 | -0.0011 | 178  | 188  | 1 | 62.72  | 36 |
| 1416.7196 | 2 | 1416.7209 | -0.0013 | 112  | 125  | 0 | 61.41  | 37 |
| 1432.7226 | 2 | 1432.7232 | -0.0006 | 382  | 394  | 0 | 75.39  | 38 |
| 1612.8656 | 3 | 1612.8685 | -0.003  | 352  | 364  | 1 | 56.31  | 35 |
| 2455.3926 | 2 | 2455.3938 | -0.0011 | 437  | 459  | 0 | 73.38  | 27 |
| 1122.5718 | 2 | 1122.5743 | -0.0025 | 200  | 209  | 0 | 40.97  | 37 |
| 1262.6368 | 3 | 1262.6367 | 0       | 361  | 371  | 0 | 46.03  | 38 |
| 1315.6617 | 2 | 1315.6619 | -0.0002 | 181  | 194  | 0 | 69.4   | 37 |
| 1559.8023 | 2 | 1559.8042 | -0.002  | 124  | 138  | 0 | 96.08  | 38 |
| 2115.0064 | 2 | 2115.0062 | 0.0003  | 41   | 60   | 0 | 95.52  | 37 |
| 2375.1066 | 2 | 2375.107  | -0.0004 | 139  | 160  | 0 | 128.33 | 36 |
| 2449.1529 | 3 | 2448.1526 | 1.0003  | 334  | 356  | 0 | 53.64  | 37 |
| 799.529   | 2 | 799.528   | 0.0011  | 64   | 70   | 1 | 31.58  | 29 |
| 975.4407  | 2 | 975.441   | -0.0003 | 21   | 30   | 0 | 80.61  | 33 |
| 1131.5194 | 2 | 1131.5197 | -0.0003 | 199  | 208  | 0 | 51.64  | 34 |
| 1162.59   | 2 | 1162.5903 | -0.0003 | 318  | 328  | 0 | 39.15  | 38 |
| 1514.7409 | 2 | 1514.7419 | -0.0009 | 87   | 97   | 0 | 52.47  | 37 |
| 1789.881  | 2 | 1789.8846 | -0.0036 | 241  | 256  | 0 | 107.03 | 38 |
| 1968.0739 | 3 | 1967.0727 | 1.0012  | 98   | 115  | 0 | 35.21  | 34 |
| 1974.8756 | 3 | 1974.8782 | -0.0026 | 71   | 86   | 0 | 35.39  | 34 |
| 2212.0816 | 2 | 2212.0834 | -0.0018 | 294  | 314  | 0 | 107.96 | 37 |
| 3150.634  | 3 | 3150.635  | -0.001  | 150  | 179  | 0 | 84.45  | 34 |
| 987.477   | 2 | 987.4774  | -0.0004 | 198  | 205  | 0 | 38.58  | 34 |
| 1034.5512 | 2 | 1034.5509 | 0.0003  | 413  | 423  | 0 | 38.99  | 37 |
| 1204.5471 | 2 | 1204.5473 | -0.0002 | 981  | 991  | 0 | 43.87  | 35 |
| 1248.6103 | 2 | 1248.6098 | 0.0004  | 816  | 827  | 0 | 40.17  | 38 |
| 1382.7441 | 2 | 1382.7445 | -0.0004 | 591  | 602  | 0 | 69.45  | 35 |
| 1495.8294 | 2 | 1495.8286 | 0.0008  | 705  | 717  | 0 | 108.53 | 33 |
| 1617.8409 | 2 | 1617.8403 | 0.0007  | 992  | 1006 | 0 | 87.25  | 37 |
| 1912.1402 | 2 | 1912.1397 | 0.0005  | 1025 | 1041 | 0 | 93.89  | 22 |
| 939.5385  | 2 | 939.5389  | -0.0004 | 286  | 293  | 0 | 36.35  | 30 |
| 1267.6035 | 2 | 1267.6044 | -0.0009 | 51   | 61   | 0 | 47.17  | 37 |
| 1308.7441 | 2 | 1308.7442 | -0.0001 | 146  | 157  | 0 | 81.7   | 32 |
| 1358.7812 | 2 | 1358.7809 | 0.0003  | 101  | 112  | 0 | 35.71  | 32 |
| 1371.7443 | 2 | 1371.7439 | 0.0005  | 179  | 190  | 0 | 67.82  | 37 |
| 1652.805  | 2 | 1652.8046 | 0.0004  | 131  | 143  | 0 | 81.4   | 37 |
| 1675.8141 | 2 | 1675.8152 | -0.0011 | 264  | 278  | 0 | 56.53  | 38 |
| 1905.0092 | 2 | 1905.0095 | -0.0003 | 191  | 206  | 0 | 94.43  | 36 |
| 1948.8598 | 2 | 1948.8578 | 0.0021  | 396  | 411  | 0 | 88.14  | 33 |
| 838.459   | 2 | 838.4589  | 0.0001  | 54   | 60   | 0 | 53.24  | 33 |

|           |   |           |         |     |     |   |        |    |
|-----------|---|-----------|---------|-----|-----|---|--------|----|
| 1180.5727 | 2 | 1180.5724 | 0.0003  | 410 | 420 | 0 | 49.67  | 37 |
| 1287.7028 | 2 | 1287.7074 | -0.0046 | 437 | 447 | 0 | 49.78  | 37 |
| 1408.6901 | 2 | 1408.6908 | -0.0007 | 82  | 93  | 0 | 55.73  | 38 |
| 1528.8072 | 2 | 1528.8079 | -0.0006 | 278 | 291 | 0 | 64.14  | 37 |
| 1535.9538 | 3 | 1535.9538 | 0       | 559 | 572 | 0 | 79.82  | 20 |
| 1593.8626 | 3 | 1593.8627 | -0.0001 | 384 | 398 | 0 | 45.1   | 34 |
| 1819.9073 | 2 | 1819.9098 | -0.0025 | 185 | 202 | 0 | 117.42 | 38 |
| 910.4896  | 2 | 910.4913  | -0.0016 | 125 | 131 | 0 | 39.36  | 34 |
| 1266.7282 | 2 | 1266.7296 | -0.0014 | 282 | 293 | 0 | 49.15  | 31 |
| 1368.624  | 2 | 1368.6245 | -0.0005 | 225 | 235 | 0 | 47.83  | 35 |
| 1576.8456 | 3 | 1576.8461 | -0.0005 | 110 | 124 | 0 | 39.1   | 36 |
| 1613.9068 | 2 | 1613.9062 | 0.0006  | 433 | 446 | 0 | 108.33 | 33 |
| 1668.821  | 2 | 1668.822  | -0.001  | 181 | 196 | 0 | 136.24 | 37 |
| 2228.2521 | 3 | 2228.2528 | -0.0007 | 199 | 219 | 0 | 37.79  | 30 |
| 2491.3427 | 3 | 2491.3435 | -0.0008 | 158 | 180 | 0 | 72.95  | 33 |
| 1181.7021 | 2 | 1181.702  | 0.0002  | 78  | 89  | 0 | 60.29  | 30 |
| 1198.6557 | 2 | 1198.6557 | 0       | 286 | 296 | 0 | 67.81  | 35 |
| 1279.7603 | 2 | 1279.7612 | -0.0009 | 161 | 173 | 0 | 79.81  | 28 |
| 1551.7472 | 2 | 1551.749  | -0.0019 | 542 | 555 | 0 | 73.44  | 38 |
| 2568.4062 | 2 | 2568.405  | 0.0012  | 297 | 320 | 0 | 128.47 | 31 |
| 754.4342  | 2 | 754.4337  | 0.0005  | 405 | 411 | 0 | 31.91  | 31 |
| 1025.587  | 2 | 1025.5869 | 0.0001  | 424 | 433 | 0 | 48.6   | 32 |
| 1042.5665 | 2 | 1042.5659 | 0.0006  | 363 | 373 | 0 | 44.33  | 35 |
| 1215.6174 | 2 | 1215.6169 | 0.0004  | 379 | 390 | 0 | 50.24  | 37 |
| 1241.607  | 3 | 1241.6074 | -0.0004 | 413 | 423 | 0 | 42.13  | 36 |
| 1249.6297 | 2 | 1249.6302 | -0.0005 | 277 | 287 | 0 | 66.87  | 38 |
| 1329.7499 | 2 | 1329.7504 | -0.0005 | 448 | 459 | 0 | 74.17  | 35 |
| 2307.1486 | 2 | 2307.1495 | -0.0009 | 672 | 693 | 0 | 151.72 | 38 |
| 949.5239  | 2 | 949.5233  | 0.0006  | 406 | 413 | 0 | 48.5   | 35 |
| 1216.7324 | 3 | 1216.7332 | -0.0008 | 70  | 79  | 1 | 43.6   | 28 |
| 1291.652  | 3 | 1291.6521 | 0       | 307 | 317 | 0 | 44.38  | 38 |
| 1492.7226 | 2 | 1492.7232 | -0.0006 | 271 | 284 | 0 | 68.74  | 38 |
| 1547.8812 | 2 | 1547.881  | 0.0002  | 139 | 152 | 0 | 102.78 | 31 |
| 1960.9654 | 3 | 1960.9676 | -0.0022 | 318 | 333 | 0 | 39.09  | 37 |
| 2095.1654 | 3 | 2095.1677 | -0.0023 | 341 | 359 | 0 | 82.48  | 31 |
| 2317.0328 | 2 | 2317.0328 | 0.0001  | 223 | 242 | 0 | 107.44 | 34 |
| 784.5062  | 2 | 784.5058  | 0.0004  | 267 | 273 | 0 | 45.02  | 31 |
| 825.4954  | 2 | 825.496   | -0.0006 | 523 | 530 | 0 | 35.63  | 29 |
| 1015.5184 | 2 | 1015.5186 | -0.0001 | 50  | 59  | 0 | 39.45  | 36 |
| 1195.7286 | 2 | 1195.7288 | -0.0002 | 469 | 479 | 0 | 58.62  | 28 |
| 1266.5685 | 2 | 1266.5696 | -0.0012 | 137 | 148 | 0 | 87.26  | 35 |
| 1414.7759 | 2 | 1414.778  | -0.0021 | 153 | 165 | 0 | 68.77  | 36 |
| 1523.7534 | 2 | 1523.7541 | -0.0007 | 213 | 225 | 0 | 71.88  | 37 |
| 1660.7949 | 2 | 1660.7944 | 0.0005  | 500 | 514 | 0 | 89.94  | 37 |
| 2616.4135 | 3 | 2616.411  | 0.0026  | 534 | 559 | 0 | 74.48  | 32 |
| 839.5115  | 2 | 839.5116  | -0.0001 | 353 | 360 | 0 | 40.99  | 28 |
| 1064.5905 | 2 | 1064.5906 | -0.0001 | 15  | 23  | 0 | 52.56  | 34 |
| 1369.6799 | 2 | 1369.6799 | 0       | 127 | 138 | 0 | 73.13  | 37 |
| 1418.7    | 2 | 1418.7041 | -0.0042 | 303 | 315 | 1 | 43.29  | 38 |
| 1442.6546 | 2 | 1442.6565 | -0.0019 | 69  | 80  | 0 | 67.64  | 34 |
| 2160.9136 | 3 | 2160.9173 | -0.0037 | 178 | 195 | 0 | 35.61  | 30 |
| 2720.3548 | 3 | 2720.3545 | 0.0003  | 236 | 260 | 0 | 83.21  | 37 |
| 3020.2786 | 3 | 3020.2785 | 0.0001  | 81  | 111 | 0 | 94.56  | 29 |
| 3431.7165 | 4 | 3431.7184 | -0.0019 | 268 | 297 | 1 | 69.43  | 36 |
| 764.4179  | 2 | 764.4181  | -0.0002 | 281 | 287 | 0 | 37.17  | 34 |
| 872.509   | 2 | 872.508   | 0.001   | 292 | 300 | 0 | 41.47  | 38 |
| 978.466   | 2 | 978.4672  | -0.0012 | 365 | 373 | 0 | 38.96  | 36 |
| 1205.5991 | 2 | 1205.604  | -0.0049 | 61  | 70  | 0 | 73.16  | 38 |

|           |   |           |         |      |      |   |        |    |
|-----------|---|-----------|---------|------|------|---|--------|----|
| 1295.7699 | 3 | 1295.77   | -0.0001 | 328  | 338  | 1 | 35.94  | 29 |
| 1452.7465 | 2 | 1452.7474 | -0.0009 | 238  | 252  | 0 | 89.72  | 37 |
| 1501.7136 | 2 | 1501.7157 | -0.0021 | 48   | 60   | 0 | 46.5   | 36 |
| 1661.8307 | 2 | 1661.8301 | 0.0006  | 374  | 387  | 1 | 61.66  | 38 |
| 1808.8227 | 2 | 1808.8251 | -0.0023 | 75   | 91   | 0 | 90.37  | 36 |
| 2382.2639 | 3 | 2382.2656 | -0.0017 | 92   | 113  | 0 | 38.81  | 34 |
| 2648.3283 | 3 | 2648.3293 | -0.001  | 188  | 211  | 0 | 69.88  | 36 |
| 1157.6439 | 2 | 1157.6445 | -0.0005 | 197  | 208  | 0 | 43.33  | 37 |
| 1340.6217 | 2 | 1340.6217 | 0.0001  | 374  | 385  | 0 | 65.83  | 36 |
| 1478.8561 | 3 | 1478.8569 | -0.0008 | 311  | 323  | 1 | 34.23  | 30 |
| 1774.8658 | 3 | 1774.8672 | -0.0014 | 388  | 402  | 1 | 42.08  | 38 |
| 1894.8979 | 2 | 1894.8983 | -0.0003 | 155  | 171  | 0 | 79.36  | 37 |
| 1938.946  | 2 | 1937.9404 | 1.0056  | 285  | 301  | 0 | 116.45 | 37 |
| 2432.2588 | 3 | 2432.2621 | -0.0033 | 70   | 90   | 1 | 57.51  | 36 |
| 928.5706  | 2 | 928.5705  | 0.0001  | 277  | 285  | 0 | 50.46  | 33 |
| 1337.7233 | 2 | 1337.7231 | 0.0002  | 262  | 273  | 0 | 68.19  | 35 |
| 1382.6851 | 2 | 1382.6864 | -0.0013 | 628  | 640  | 0 | 114.42 | 37 |
| 2216.304  | 3 | 2216.3031 | 0.0009  | 378  | 398  | 0 | 71.47  | 23 |
| 2302.1828 | 2 | 2302.1845 | -0.0017 | 399  | 420  | 0 | 137.2  | 36 |
| 1042.5563 | 2 | 1042.556  | 0.0004  | 668  | 676  | 0 | 48.54  | 36 |
| 1340.6611 | 2 | 1340.6612 | -0.0001 | 164  | 174  | 0 | 72.04  | 36 |
| 1362.7908 | 2 | 1362.7911 | -0.0003 | 68   | 79   | 0 | 100.95 | 29 |
| 1670.9272 | 2 | 1670.9276 | -0.0004 | 891  | 905  | 0 | 103.16 | 34 |
| 2449.2748 | 2 | 2449.2741 | 0.0008  | 8    | 31   | 0 | 62.72  | 35 |
| 2719.4615 | 3 | 2718.4593 | 1.0023  | 6    | 31   | 1 | 67.06  | 33 |
| 1194.6384 | 2 | 1194.6397 | -0.0013 | 302  | 312  | 0 | 51.49  | 35 |
| 1799.9848 | 2 | 1799.9881 | -0.0033 | 88   | 105  | 0 | 93.86  | 35 |
| 1854.0512 | 2 | 1854.0502 | 0.001   | 437  | 453  | 0 | 98.45  | 30 |
| 2222.1828 | 2 | 2222.1835 | -0.0006 | 163  | 183  | 0 | 115.37 | 34 |
| 3201.6505 | 3 | 3201.6517 | -0.0013 | 405  | 436  | 0 | 48.65  | 34 |
| 799.529   | 2 | 799.528   | 0.0011  | 64   | 70   | 1 | 31.58  | 29 |
| 975.4407  | 2 | 975.441   | -0.0003 | 21   | 30   | 0 | 80.61  | 33 |
| 1013.4738 | 2 | 1013.4739 | -0.0001 | 186  | 193  | 0 | 42.11  | 34 |
| 1162.59   | 2 | 1162.5903 | -0.0003 | 318  | 328  | 0 | 39.15  | 38 |
| 1191.5222 | 2 | 1191.523  | -0.0008 | 199  | 208  | 0 | 60.65  | 33 |
| 1514.7409 | 2 | 1514.7419 | -0.0009 | 87   | 97   | 0 | 52.47  | 37 |
| 1773.8891 | 2 | 1773.8897 | -0.0006 | 241  | 256  | 0 | 115.28 | 38 |
| 1933.8481 | 3 | 1933.8516 | -0.0035 | 71   | 86   | 0 | 37.74  | 33 |
| 1290.6821 | 2 | 1290.682  | 0.0001  | 1272 | 1283 | 0 | 76.12  | 37 |
| 1294.8338 | 2 | 1294.8336 | 0.0001  | 618  | 629  | 0 | 95.94  | 20 |
| 1374.8122 | 2 | 1374.8122 | 0       | 225  | 236  | 0 | 79.24  | 28 |
| 1942.0884 | 3 | 1942.0887 | -0.0003 | 225  | 241  | 1 | 44.72  | 32 |
| 2028.1254 | 2 | 2028.1255 | -0.0001 | 839  | 856  | 0 | 48.81  | 32 |
| 2073.1194 | 2 | 2073.1218 | -0.0024 | 694  | 713  | 0 | 89.34  | 34 |
| 2634.3939 | 3 | 2634.3945 | -0.0005 | 93   | 115  | 0 | 36.06  | 34 |
| 1188.6341 | 2 | 1188.635  | -0.0009 | 182  | 194  | 0 | 87.04  | 38 |
| 1342.7086 | 2 | 1342.7092 | -0.0006 | 195  | 209  | 0 | 79.97  | 37 |
| 1407.6667 | 2 | 1407.6671 | -0.0003 | 293  | 305  | 0 | 57.34  | 37 |
| 1822.9454 | 2 | 1822.9465 | -0.0011 | 43   | 59   | 0 | 111.17 | 36 |
| 2479.0672 | 2 | 2479.0697 | -0.0024 | 106  | 127  | 0 | 98.54  | 31 |
| 977.5188  | 2 | 977.5182  | 0.0006  | 37   | 44   | 0 | 46.9   | 36 |
| 1020.5598 | 2 | 1020.5604 | -0.0006 | 361  | 369  | 0 | 37.06  | 36 |
| 1352.7907 | 2 | 1352.7915 | -0.0009 | 238  | 250  | 0 | 37.04  | 30 |
| 1530.7148 | 2 | 1530.7161 | -0.0013 | 86   | 99   | 0 | 127.5  | 36 |
| 1681.83   | 2 | 1681.8312 | -0.0012 | 320  | 334  | 0 | 94.01  | 38 |
| 3107.5153 | 3 | 3107.5155 | -0.0002 | 45   | 72   | 0 | 70.96  | 37 |
| 1108.5333 | 2 | 1108.5335 | -0.0002 | 456  | 464  | 0 | 40.72  | 37 |
| 1147.588  | 2 | 1147.5873 | 0.0007  | 468  | 477  | 0 | 43.86  | 38 |

|           |   |           |         |      |      |   |        |    |
|-----------|---|-----------|---------|------|------|---|--------|----|
| 1300.6427 | 2 | 1300.6445 | -0.0018 | 97   | 108  | 0 | 36.69  | 36 |
| 1491.7921 | 2 | 1491.7933 | -0.0012 | 544  | 557  | 0 | 75.9   | 37 |
| 1542.8306 | 3 | 1542.8307 | -0.0001 | 186  | 198  | 0 | 46.4   | 37 |
| 2044.0958 | 2 | 2044.0953 | 0.0006  | 707  | 724  | 0 | 116.35 | 35 |
| 2510.0242 | 3 | 2510.0259 | -0.0017 | 353  | 373  | 0 | 44.1   | 26 |
| 2885.5102 | 3 | 2884.5078 | 1.0024  | 375  | 401  | 0 | 35.92  | 34 |
| 3112.6351 | 4 | 3112.6379 | -0.0028 | 159  | 185  | 1 | 54.44  | 33 |
| 1036.5241 | 2 | 1036.5223 | 0.0018  | 686  | 694  | 0 | 51.34  | 37 |
| 1254.6677 | 2 | 1254.6681 | -0.0004 | 828  | 840  | 0 | 82.05  | 35 |
| 1276.6141 | 2 | 1276.6147 | -0.0005 | 575  | 586  | 0 | 66.6   | 37 |
| 1402.8586 | 2 | 1402.8588 | -0.0001 | 562  | 574  | 0 | 86.97  | 20 |
| 1564.9005 | 2 | 1564.9011 | -0.0006 | 671  | 685  | 0 | 76.86  | 29 |
| 1701.012  | 2 | 1701.0117 | 0.0004  | 869  | 883  | 0 | 48.91  | 24 |
| 711.4281  | 2 | 711.4279  | 0.0002  | 219  | 225  | 0 | 30.68  | 28 |
| 1172.5859 | 2 | 1172.586  | 0       | 512  | 521  | 0 | 62.57  | 36 |
| 1319.621  | 3 | 1319.6218 | -0.0008 | 372  | 383  | 0 | 48.69  | 37 |
| 1397.6713 | 2 | 1397.6715 | -0.0002 | 206  | 217  | 0 | 63.28  | 37 |
| 1525.7666 | 2 | 1525.7664 | 0.0001  | 206  | 218  | 1 | 50.64  | 37 |
| 1927.9405 | 3 | 1927.9422 | -0.0017 | 384  | 400  | 0 | 65.35  | 37 |
| 2271.159  | 2 | 2271.1595 | -0.0004 | 85   | 106  | 0 | 87.15  | 37 |
| 2521.3746 | 3 | 2521.3751 | -0.0005 | 437  | 461  | 0 | 68.85  | 31 |
| 3319.6366 | 3 | 3319.6401 | -0.0035 | 289  | 317  | 0 | 40.42  | 36 |
| 1101.6552 | 2 | 1101.6546 | 0.0006  | 73   | 82   | 0 | 97.13  | 32 |
| 1310.781  | 2 | 1310.7809 | 0.0001  | 1205 | 1215 | 0 | 79.62  | 29 |
| 1543.7911 | 2 | 1543.7916 | -0.0005 | 397  | 410  | 0 | 87.53  | 37 |
| 1724.8415 | 2 | 1723.8529 | 0.9886  | 1809 | 1823 | 0 | 92.11  | 37 |
| 2332.2633 | 3 | 2332.2638 | -0.0005 | 657  | 677  | 0 | 40.23  | 33 |
| 784.5062  | 2 | 784.5058  | 0.0004  | 266  | 272  | 0 | 45.02  | 31 |
| 825.4954  | 2 | 825.496   | -0.0006 | 522  | 529  | 0 | 35.63  | 29 |
| 1015.5184 | 2 | 1015.5186 | -0.0001 | 49   | 58   | 0 | 39.45  | 36 |
| 1195.7286 | 2 | 1195.7288 | -0.0002 | 468  | 478  | 0 | 58.62  | 28 |
| 1266.5685 | 2 | 1266.5696 | -0.0012 | 136  | 147  | 0 | 87.26  | 35 |
| 1417.6863 | 2 | 1417.6878 | -0.0015 | 228  | 239  | 0 | 59.48  | 37 |
| 1523.7534 | 2 | 1523.7541 | -0.0007 | 212  | 224  | 0 | 71.88  | 37 |
| 1660.7949 | 2 | 1660.7944 | 0.0005  | 499  | 513  | 0 | 89.94  | 37 |
| 1192.6554 | 2 | 1192.6564 | -0.001  | 138  | 147  | 0 | 58.62  | 35 |
| 1216.5975 | 2 | 1216.5989 | -0.0014 | 321  | 330  | 0 | 53.61  | 36 |
| 1422.6565 | 2 | 1422.6568 | -0.0002 | 183  | 193  | 0 | 74.74  | 36 |
| 1468.7985 | 2 | 1468.7998 | -0.0013 | 102  | 116  | 0 | 105.11 | 35 |
| 2235.1356 | 2 | 2235.1358 | -0.0001 | 118  | 137  | 0 | 81.64  | 37 |
| 840.5179  | 2 | 840.5181  | -0.0002 | 269  | 276  | 0 | 45.56  | 30 |
| 1323.7762 | 2 | 1323.7762 | 0       | 139  | 151  | 0 | 59.89  | 28 |
| 1598.8068 | 2 | 1598.8086 | -0.0018 | 161  | 174  | 0 | 86.41  | 37 |
| 1677.8197 | 2 | 1677.8243 | -0.0046 | 239  | 253  | 0 | 91.95  | 38 |
| 3301.6891 | 3 | 3300.6878 | 1.0013  | 7    | 39   | 0 | 89.49  | 35 |
| 1182.5915 | 2 | 1182.5921 | -0.0006 | 747  | 756  | 0 | 48.77  | 36 |
| 1196.5818 | 2 | 1196.5826 | -0.0008 | 138  | 148  | 0 | 60.27  | 36 |
| 1309.6364 | 2 | 1309.6375 | -0.0011 | 163  | 174  | 0 | 46.38  | 37 |
| 1490.7989 | 2 | 1490.798  | 0.0009  | 699  | 712  | 0 | 101.97 | 37 |
| 1534.7204 | 2 | 1534.7223 | -0.0019 | 469  | 483  | 0 | 109.83 | 37 |
| 2406.2456 | 2 | 2406.2471 | -0.0015 | 75   | 97   | 0 | 41.61  | 36 |
| 940.5454  | 2 | 940.5454  | 0.0001  | 190  | 198  | 1 | 33.81  | 30 |
| 1033.5229 | 2 | 1033.5226 | 0.0004  | 344  | 352  | 0 | 58.74  | 38 |
| 1443.6492 | 3 | 1443.6491 | 0       | 63   | 76   | 0 | 40.91  | 34 |
| 1571.7435 | 3 | 1571.7441 | -0.0006 | 62   | 76   | 1 | 79.14  | 36 |
| 1612.7964 | 2 | 1612.7984 | -0.002  | 266  | 279  | 1 | 58.43  | 37 |
| 1928.7984 | 2 | 1928.7986 | -0.0002 | 385  | 400  | 0 | 90.96  | 29 |
| 2171.063  | 2 | 2171.0667 | -0.0037 | 149  | 168  | 0 | 55.68  | 37 |

|           |   |           |         |     |     |   |        |    |
|-----------|---|-----------|---------|-----|-----|---|--------|----|
| 991.5337  | 2 | 991.5339  | -0.0002 | 220 | 228 | 0 | 57.69  | 36 |
| 1157.6439 | 2 | 1157.6445 | -0.0005 | 191 | 202 | 0 | 43.33  | 37 |
| 1270.6785 | 3 | 1270.6782 | 0.0003  | 208 | 219 | 0 | 40.18  | 36 |
| 1288.5965 | 2 | 1288.5976 | -0.001  | 399 | 408 | 1 | 40.79  | 35 |
| 1419.82   | 3 | 1419.8198 | 0.0002  | 112 | 124 | 1 | 51.38  | 30 |
| 2028.0518 | 2 | 2028.0527 | -0.0009 | 246 | 264 | 0 | 101.05 | 37 |
| 2068.9246 | 2 | 2068.9259 | -0.0012 | 15  | 33  | 0 | 100.8  | 34 |
| 1255.6887 | 2 | 1255.6884 | 0.0003  | 88  | 99  | 0 | 50.66  | 35 |
| 1290.6305 | 2 | 1290.6303 | 0.0002  | 34  | 45  | 0 | 52.22  | 38 |
| 1319.6509 | 2 | 1319.651  | -0.0001 | 299 | 309 | 0 | 46.09  | 38 |
| 1526.7933 | 2 | 1526.794  | -0.0007 | 358 | 371 | 0 | 82.13  | 36 |
| 1582.7837 | 3 | 1582.7839 | -0.0002 | 441 | 454 | 1 | 39.73  | 37 |
| 2239.1438 | 2 | 2239.1446 | -0.0007 | 486 | 505 | 0 | 116.47 | 37 |
| 868.4917  | 2 | 868.4919  | -0.0002 | 232 | 239 | 0 | 36.98  | 32 |
| 992.5481  | 2 | 992.5477  | 0.0003  | 319 | 327 | 0 | 61.35  | 35 |
| 1099.5017 | 2 | 1099.5015 | 0.0002  | 151 | 158 | 0 | 38.39  | 33 |
| 1576.7844 | 2 | 1576.7847 | -0.0003 | 248 | 260 | 0 | 86.66  | 38 |
| 2137.1762 | 2 | 2137.1783 | -0.0021 | 352 | 374 | 0 | 75.35  | 32 |
| 1044.5817 | 2 | 1044.5815 | 0.0002  | 169 | 179 | 0 | 57.12  | 37 |
| 1410.8321 | 2 | 1410.8334 | -0.0012 | 152 | 164 | 0 | 53.63  | 30 |
| 2989.657  | 3 | 2989.66   | -0.003  | 67  | 94  | 0 | 145.47 | 28 |
| 968.6011  | 2 | 968.6019  | -0.0007 | 143 | 151 | 0 | 72.09  | 28 |
| 1697.9568 | 2 | 1697.9563 | 0.0004  | 59  | 75  | 0 | 144.4  | 32 |
| 1154.6405 | 2 | 1154.6408 | -0.0003 | 192 | 203 | 0 | 65.82  | 34 |
| 1255.6107 | 2 | 1255.6118 | -0.0011 | 159 | 169 | 1 | 62.72  | 36 |
| 1360.6327 | 2 | 1360.6333 | -0.0006 | 571 | 581 | 0 | 53.34  | 35 |
| 1493.7148 | 2 | 1493.7151 | -0.0002 | 68  | 80  | 0 | 60.53  | 37 |
| 2052.0046 | 2 | 2052.0052 | -0.0005 | 313 | 330 | 0 | 116.91 | 38 |
| 1287.6609 | 2 | 1287.6605 | 0.0004  | 95  | 106 | 0 | 81.56  | 37 |
| 1422.6625 | 2 | 1422.6627 | -0.0002 | 28  | 40  | 0 | 83     | 36 |
| 1941.9825 | 2 | 1941.9836 | -0.0011 | 11  | 27  | 0 | 131.16 | 37 |
| 940.5454  | 2 | 940.5454  | 0.0001  | 191 | 199 | 1 | 33.81  | 30 |
| 1443.6492 | 3 | 1443.6491 | 0       | 64  | 77  | 0 | 40.91  | 34 |
| 1571.7435 | 3 | 1571.7441 | -0.0006 | 63  | 77  | 1 | 79.14  | 36 |
| 1612.7964 | 2 | 1612.7984 | -0.002  | 267 | 280 | 1 | 58.43  | 37 |
| 1653.8923 | 2 | 1653.8937 | -0.0014 | 299 | 313 | 0 | 102.14 | 35 |
| 2171.063  | 2 | 2171.0667 | -0.0037 | 150 | 169 | 0 | 55.68  | 37 |
| 1112.6439 | 2 | 1112.6441 | -0.0002 | 821 | 831 | 0 | 95.57  | 33 |
| 1441.8293 | 2 | 1441.8293 | 0       | 285 | 298 | 0 | 97.43  | 33 |
| 1814.9333 | 2 | 1814.9342 | -0.0009 | 299 | 313 | 0 | 99.52  | 37 |
| 1125.7004 | 2 | 1125.7009 | -0.0005 | 280 | 289 | 0 | 83.31  | 26 |
| 1235.6866 | 2 | 1235.6874 | -0.0008 | 431 | 441 | 0 | 50.05  | 34 |
| 1325.6978 | 2 | 1325.6979 | -0.0002 | 371 | 381 | 0 | 67.36  | 35 |
| 1407.776  | 2 | 1407.7762 | -0.0002 | 398 | 410 | 0 | 111.61 | 34 |
| 964.4864  | 2 | 964.4865  | -0.0002 | 196 | 204 | 0 | 51.52  | 37 |
| 1244.6745 | 2 | 1244.6765 | -0.002  | 100 | 111 | 0 | 63.63  | 37 |
| 1560.7154 | 2 | 1560.7168 | -0.0015 | 168 | 181 | 0 | 68.49  | 35 |
| 1656.7367 | 2 | 1656.738  | -0.0013 | 61  | 75  | 0 | 54.65  | 34 |
| 1703.8821 | 2 | 1703.8842 | -0.0021 | 79  | 93  | 0 | 104.98 | 37 |
| 881.408   | 2 | 881.4065  | 0.0014  | 226 | 232 | 0 | 46.32  | 35 |
| 1240.6458 | 2 | 1240.6551 | -0.0093 | 17  | 27  | 0 | 52.44  | 35 |
| 1265.6648 | 2 | 1265.6656 | -0.0007 | 28  | 39  | 0 | 50.17  | 36 |
| 1406.6046 | 2 | 1406.6063 | -0.0016 | 278 | 290 | 0 | 82.47  | 32 |
| 1736.8396 | 2 | 1736.8403 | -0.0007 | 291 | 305 | 0 | 118.65 | 37 |
| 1217.665  | 2 | 1217.6656 | -0.0006 | 350 | 359 | 0 | 52.09  | 37 |
| 1371.7801 | 2 | 1371.7802 | -0.0001 | 70  | 80  | 0 | 58.43  | 34 |
| 1614.8982 | 2 | 1614.8981 | 0.0001  | 81  | 95  | 0 | 112.62 | 35 |
| 2326.2605 | 3 | 2326.2606 | -0.0001 | 284 | 304 | 0 | 50.05  | 33 |

|           |   |           |         |      |      |   |        |    |
|-----------|---|-----------|---------|------|------|---|--------|----|
| 2521.2939 | 3 | 2520.2934 | 1.0005  | 208  | 229  | 0 | 59.83  | 36 |
| 1233.5588 | 2 | 1233.5587 | 0.0001  | 211  | 220  | 0 | 39.82  | 35 |
| 2034.9742 | 2 | 2034.9779 | -0.0037 | 104  | 122  | 0 | 93.45  | 37 |
| 2677.2518 | 2 | 2677.2541 | -0.0023 | 501  | 524  | 0 | 107.32 | 36 |
| 1181.7021 | 2 | 1181.702  | 0.0002  | 74   | 85   | 0 | 60.29  | 30 |
| 1228.6913 | 2 | 1228.6914 | -0.0001 | 282  | 292  | 0 | 83.6   | 36 |
| 1279.7603 | 2 | 1279.7612 | -0.0009 | 157  | 169  | 0 | 79.81  | 28 |
| 1551.7472 | 2 | 1551.749  | -0.0019 | 538  | 551  | 0 | 73.44  | 38 |
| 2594.417  | 3 | 2594.4207 | -0.0037 | 293  | 316  | 0 | 31.12  | 30 |
| 1407.7588 | 2 | 1407.7584 | 0.0004  | 318  | 329  | 0 | 54.81  | 35 |
| 1852.0557 | 2 | 1852.0557 | 0       | 348  | 364  | 0 | 140.17 | 30 |
| 1542.7605 | 2 | 1542.7606 | -0.0001 | 356  | 368  | 0 | 104.6  | 37 |
| 1682.946  | 2 | 1682.9454 | 0.0006  | 133  | 147  | 0 | 111.67 | 32 |
| 1217.665  | 2 | 1217.6656 | -0.0006 | 350  | 359  | 0 | 52.09  | 37 |
| 1371.7801 | 2 | 1371.7802 | -0.0001 | 70   | 80   | 0 | 58.43  | 34 |
| 1614.8982 | 2 | 1614.8981 | 0.0001  | 81   | 95   | 0 | 112.62 | 35 |
| 1865.1028 | 2 | 1865.1026 | 0.0002  | 852  | 869  | 0 | 45.93  | 23 |
| 2326.2605 | 3 | 2326.2606 | -0.0001 | 284  | 304  | 0 | 50.05  | 33 |
| 905.4971  | 2 | 905.4971  | 0.0001  | 518  | 525  | 0 | 55.38  | 37 |
| 1254.7011 | 2 | 1254.7013 | -0.0002 | 409  | 418  | 0 | 54.71  | 33 |
| 1703.9824 | 2 | 1703.9821 | 0.0003  | 318  | 332  | 0 | 119.9  | 27 |
| 2186.1609 | 3 | 2186.1623 | -0.0014 | 533  | 550  | 1 | 47.15  | 35 |
| 2919.6038 | 3 | 2919.6045 | -0.0007 | 844  | 870  | 0 | 42.86  | 30 |
| 2280.1544 | 3 | 2279.1533 | 1.0011  | 88   | 109  | 0 | 75.16  | 37 |
| 2315.2036 | 3 | 2315.2042 | -0.0006 | 506  | 527  | 0 | 80.78  | 36 |
| 3134.5366 | 3 | 3134.5442 | -0.0076 | 325  | 354  | 0 | 50.45  | 36 |
| 1264.5773 | 2 | 1264.5791 | -0.0019 | 174  | 184  | 0 | 53.04  | 36 |
| 1407.6793 | 2 | 1407.6783 | 0.001   | 1973 | 1984 | 0 | 82.4   | 38 |
| 1944.0308 | 2 | 1944.0316 | -0.0008 | 2070 | 2087 | 0 | 78.92  | 36 |
| 2333.2368 | 3 | 2333.2379 | -0.0011 | 265  | 287  | 0 | 61.92  | 35 |
| 879.446   | 2 | 879.445   | 0.001   | 228  | 235  | 0 | 40.93  | 37 |
| 936.5503  | 2 | 936.5505  | -0.0001 | 162  | 169  | 0 | 46.99  | 30 |
| 982.5351  | 2 | 982.5349  | 0.0003  | 11   | 19   | 0 | 59.53  | 35 |
| 1032.557  | 2 | 1032.5564 | 0.0007  | 344  | 352  | 0 | 46.33  | 37 |
| 1248.6273 | 2 | 1248.6272 | 0.0001  | 215  | 225  | 0 | 44.1   | 38 |
| 1251.5808 | 2 | 1251.5812 | -0.0004 | 195  | 204  | 0 | 45.64  | 36 |
| 1319.6587 | 2 | 1319.6622 | -0.0035 | 362  | 373  | 0 | 59.22  | 38 |
| 1595.6874 | 2 | 1595.6886 | -0.0012 | 291  | 304  | 0 | 68.3   | 32 |
| 1767.8897 | 3 | 1767.8904 | -0.0007 | 101  | 115  | 0 | 38.75  | 37 |
| 961.5233  | 2 | 961.5233  | 0.0001  | 322  | 329  | 0 | 71.34  | 37 |
| 1038.6066 | 2 | 1038.6073 | -0.0007 | 290  | 298  | 0 | 38.51  | 29 |
| 1380.7126 | 2 | 1380.7136 | -0.001  | 30   | 42   | 0 | 63.73  | 37 |
| 1548.8417 | 3 | 1548.8412 | 0.0005  | 309  | 321  | 1 | 44.29  | 35 |
| 2161.9041 | 3 | 2161.907  | -0.0029 | 91   | 111  | 0 | 50.46  | 28 |
| 2389.2278 | 3 | 2389.2278 | 0       | 61   | 83   | 0 | 79.52  | 37 |
| 1384.7921 | 2 | 1384.7926 | -0.0005 | 415  | 427  | 0 | 77.41  | 34 |
| 2066.092  | 2 | 2066.0936 | -0.0015 | 648  | 666  | 0 | 117.08 | 35 |
| 1070.6333 | 2 | 1070.6336 | -0.0002 | 11   | 21   | 0 | 68.33  | 34 |
| 1315.6525 | 2 | 1315.6521 | 0.0005  | 59   | 69   | 0 | 61.34  | 37 |
| 1707.8722 | 2 | 1707.8719 | 0.0003  | 138  | 153  | 0 | 42.15  | 37 |
| 2154.9994 | 2 | 2154.9997 | -0.0003 | 28   | 46   | 0 | 120.05 | 36 |
| 1130.6335 | 2 | 1130.6335 | 0       | 239  | 249  | 0 | 73.56  | 36 |
| 1190.6903 | 2 | 1190.6911 | -0.0008 | 211  | 220  | 0 | 48.94  | 30 |
| 1264.6399 | 2 | 1264.6412 | -0.0013 | 152  | 163  | 0 | 54.82  | 38 |
| 1872.9306 | 2 | 1872.933  | -0.0024 | 221  | 238  | 0 | 89.82  | 37 |
| 3213.7267 | 3 | 3213.7285 | -0.0018 | 250  | 277  | 0 | 42.8   | 31 |
| 1022.5844 | 2 | 1022.5834 | 0.001   | 26   | 34   | 0 | 55.34  | 32 |
| 1059.5497 | 2 | 1059.5502 | -0.0005 | 79   | 86   | 0 | 39.22  | 38 |

|           |   |           |         |      |      |   |        |    |
|-----------|---|-----------|---------|------|------|---|--------|----|
| 2100.0498 | 2 | 2100.0521 | -0.0022 | 56   | 75   | 0 | 112.07 | 37 |
| 1192.6106 | 3 | 1192.6102 | 0.0005  | 48   | 58   | 0 | 58.32  | 38 |
| 1403.7902 | 2 | 1402.7932 | 0.997   | 150  | 162  | 0 | 69.01  | 34 |
| 1630.8238 | 2 | 1630.8236 | 0.0003  | 171  | 185  | 0 | 116.63 | 38 |
| 880.5749  | 2 | 880.5746  | 0.0004  | 266  | 274  | 1 | 32.06  | 20 |
| 1301.6144 | 2 | 1301.614  | 0.0004  | 247  | 258  | 0 | 57.9   | 35 |
| 1333.7233 | 2 | 1333.7242 | -0.0008 | 49   | 61   | 0 | 90.31  | 37 |
| 2191.1244 | 2 | 2191.126  | -0.0016 | 71   | 91   | 0 | 94.89  | 37 |
| 1212.6717 | 2 | 1212.6714 | 0.0003  | 296  | 306  | 0 | 82.57  | 35 |
| 1587.7841 | 2 | 1587.7852 | -0.0012 | 228  | 243  | 0 | 98.02  | 37 |
| 1767.7786 | 3 | 1767.7787 | -0.0002 | 131  | 145  | 0 | 59.44  | 34 |
| 1372.6773 | 2 | 1372.6769 | 0.0004  | 133  | 144  | 0 | 73.53  | 37 |
| 1393.6487 | 2 | 1393.6489 | -0.0002 | 264  | 274  | 0 | 40.91  | 37 |
| 1420.5996 | 2 | 1420.6003 | -0.0007 | 243  | 254  | 0 | 47.17  | 31 |
| 1672.8893 | 2 | 1671.8831 | 1.0062  | 94   | 108  | 1 | 63.83  | 37 |
| 1747.9105 | 2 | 1747.9138 | -0.0033 | 42   | 58   | 0 | 82.62  | 37 |
| 1357.7706 | 2 | 1357.7704 | 0.0002  | 448  | 459  | 0 | 90.12  | 34 |
| 2206.174  | 2 | 2206.1732 | 0.0008  | 815  | 834  | 0 | 88.59  | 35 |
| 1302.6668 | 2 | 1302.668  | -0.0013 | 1248 | 1259 | 0 | 57.97  | 38 |
| 1434.7358 | 2 | 1434.7354 | 0.0004  | 1132 | 1144 | 0 | 67.73  | 38 |
| 2039.1102 | 2 | 2039.1092 | 0.0011  | 520  | 536  | 0 | 63.54  | 34 |
| 2660.433  | 3 | 2660.4326 | 0.0004  | 414  | 437  | 0 | 65.49  | 32 |
| 1243.7749 | 2 | 1243.7751 | -0.0002 | 344  | 355  | 0 | 89.37  | 23 |
| 1293.7111 | 2 | 1293.7115 | -0.0004 | 401  | 411  | 0 | 62.1   | 34 |
| 1884.0717 | 2 | 1884.072  | -0.0003 | 289  | 305  | 0 | 76.57  | 30 |
| 912.5546  | 2 | 912.5545  | 0.0001  | 379  | 385  | 0 | 40.87  | 31 |
| 1673.8918 | 3 | 1673.893  | -0.0012 | 21   | 33   | 0 | 73.73  | 37 |
| 1819.8018 | 3 | 1819.8047 | -0.0028 | 64   | 78   | 0 | 40.44  | 34 |
| 2307.1114 | 3 | 2307.1131 | -0.0017 | 327  | 346  | 1 | 38.01  | 37 |
| 2480.3242 | 2 | 2480.3274 | -0.0032 | 88   | 110  | 0 | 76.01  | 33 |
| 1308.7441 | 2 | 1308.7442 | -0.0001 | 146  | 157  | 0 | 81.7   | 32 |
| 1358.7812 | 2 | 1358.7809 | 0.0003  | 101  | 112  | 0 | 35.71  | 32 |
| 1652.805  | 2 | 1652.8046 | 0.0004  | 131  | 143  | 0 | 81.4   | 37 |
| 2235.1227 | 3 | 2235.1212 | 0.0016  | 365  | 382  | 0 | 43.12  | 37 |
| 2607.3154 | 3 | 2607.3156 | -0.0001 | 286  | 308  | 0 | 57.45  | 37 |
| 1731.8839 | 2 | 1731.8832 | 0.0008  | 41   | 56   | 0 | 72.22  | 37 |
| 1945.9477 | 2 | 1945.9495 | -0.0019 | 165  | 181  | 0 | 98.15  | 37 |
| 2187.2477 | 3 | 2187.2487 | -0.001  | 97   | 115  | 1 | 58.54  | 27 |
| 869.5334  | 2 | 869.5334  | -0.0001 | 236  | 243  | 0 | 59.29  | 30 |
| 1164.6178 | 2 | 1164.6179 | -0.0001 | 307  | 316  | 0 | 52.87  | 37 |
| 1380.6507 | 2 | 1380.6521 | -0.0014 | 608  | 619  | 0 | 57.03  | 37 |
| 1460.7616 | 2 | 1460.7623 | -0.0007 | 185  | 197  | 0 | 89.49  | 38 |
| 754.5067  | 2 | 754.5065  | 0.0002  | 102  | 107  | 0 | 42.9   | 20 |
| 773.5167  | 2 | 773.5163  | 0.0004  | 83   | 88   | 0 | 43.35  | 22 |
| 1505.7663 | 2 | 1505.7667 | -0.0004 | 197  | 208  | 0 | 58.14  | 38 |
| 1556.8382 | 2 | 1556.841  | -0.0028 | 161  | 175  | 0 | 109.33 | 36 |
| 914.5072  | 2 | 914.5073  | -0.0001 | 372  | 379  | 0 | 45.33  | 35 |
| 1250.6661 | 2 | 1250.6659 | 0.0002  | 444  | 453  | 0 | 69.56  | 36 |
| 1888.9271 | 2 | 1888.924  | 0.0031  | 109  | 125  | 0 | 102.95 | 38 |
| 3191.551  | 3 | 3191.551  | -0.0001 | 220  | 248  | 0 | 39.17  | 37 |
| 1367.7772 | 2 | 1367.7773 | -0.0001 | 24   | 35   | 0 | 81.81  | 32 |
| 1370.7768 | 2 | 1370.7769 | -0.0001 | 53   | 64   | 0 | 115.27 | 35 |
| 1201.682  | 2 | 1201.6819 | 0.0001  | 375  | 385  | 0 | 58     | 36 |
| 1534.9449 | 2 | 1534.9447 | 0.0003  | 810  | 823  | 0 | 80.16  | 20 |
| 2058.1172 | 2 | 2058.1183 | -0.0011 | 1687 | 1706 | 0 | 76.07  | 34 |
| 1056.6286 | 2 | 1056.6292 | -0.0005 | 57   | 67   | 0 | 66.81  | 34 |
| 1070.5972 | 2 | 1070.5972 | 0.0001  | 44   | 54   | 0 | 43.28  | 34 |
| 1253.6875 | 2 | 1253.688  | -0.0005 | 174  | 185  | 0 | 54.92  | 34 |

|           |   |           |         |      |      |   |        |    |
|-----------|---|-----------|---------|------|------|---|--------|----|
| 1413.7251 | 2 | 1413.7252 | -0.0001 | 156  | 168  | 0 | 87.59  | 36 |
| 869.4717  | 2 | 869.4719  | -0.0002 | 1417 | 1424 | 0 | 52.3   | 33 |
| 1401.7477 | 2 | 1401.7504 | -0.0027 | 360  | 371  | 0 | 66.92  | 38 |
| 1781.0047 | 2 | 1781.0047 | 0       | 1464 | 1479 | 0 | 54.01  | 31 |
| 2407.2914 | 3 | 2407.292  | -0.0006 | 2201 | 2222 | 0 | 57.02  | 33 |
| 1212.5548 | 2 | 1212.5557 | -0.0009 | 153  | 162  | 0 | 49.45  | 35 |
| 1618.8814 | 2 | 1618.8831 | -0.0017 | 200  | 213  | 0 | 81.23  | 35 |
| 1749.7869 | 3 | 1749.788  | -0.0011 | 228  | 243  | 0 | 59.65  | 35 |
| 2056.9582 | 2 | 2056.9623 | -0.004  | 244  | 262  | 1 | 70.36  | 36 |
| 927.539   | 2 | 927.5389  | 0.0001  | 239  | 246  | 0 | 48.84  | 33 |
| 1071.6692 | 2 | 1071.6692 | 0       | 153  | 162  | 0 | 31.68  | 28 |
| 1084.6396 | 2 | 1084.6393 | 0.0003  | 548  | 556  | 0 | 52.57  | 34 |
| 1256.6361 | 2 | 1256.6401 | -0.004  | 569  | 579  | 0 | 49.58  | 36 |
| 1335.7647 | 2 | 1335.765  | -0.0002 | 339  | 350  | 0 | 65.79  | 30 |
| 2153.0862 | 3 | 2153.0865 | -0.0003 | 519  | 540  | 0 | 63.89  | 37 |
| 1437.8565 | 2 | 1437.8555 | 0.001   | 117  | 130  | 0 | 36.43  | 27 |
| 1643.8516 | 2 | 1643.8519 | -0.0003 | 165  | 178  | 0 | 94.88  | 37 |
| 1666.7724 | 2 | 1666.772  | 0.0005  | 140  | 154  | 0 | 92.69  | 37 |
| 1209.6752 | 2 | 1209.6717 | 0.0035  | 5    | 15   | 0 | 36.92  | 33 |
| 1265.6971 | 2 | 1265.6979 | -0.0009 | 299  | 310  | 0 | 41.59  | 34 |
| 2276.3052 | 2 | 2276.3104 | -0.0051 | 506  | 526  | 0 | 58.76  | 26 |
| 2390.2502 | 2 | 2390.2515 | -0.0013 | 163  | 183  | 0 | 104.52 | 36 |
| 755.4533  | 2 | 755.4541  | -0.0008 | 2    | 9    | 0 | 34.89  | 30 |
| 1161.6385 | 2 | 1161.6394 | -0.0008 | 12   | 22   | 0 | 67.59  | 35 |
| 1315.6525 | 2 | 1315.6521 | 0.0005  | 60   | 70   | 0 | 61.34  | 37 |
| 1479.7576 | 2 | 1479.7569 | 0.0007  | 81   | 94   | 0 | 95.8   | 38 |
| 1070.6333 | 2 | 1070.6336 | -0.0002 | 18   | 28   | 0 | 68.33  | 34 |
| 1163.5814 | 2 | 1163.5822 | -0.0009 | 144  | 154  | 0 | 42.76  | 38 |
| 1315.6525 | 2 | 1315.6521 | 0.0005  | 66   | 76   | 0 | 61.34  | 37 |
| 1609.8351 | 2 | 1609.8352 | -0.0001 | 162  | 175  | 0 | 86.09  | 37 |
| 1161.6134 | 2 | 1161.6142 | -0.0008 | 161  | 171  | 0 | 78.13  | 38 |
| 1904.9932 | 2 | 1904.9918 | 0.0015  | 198  | 215  | 0 | 111.74 | 37 |
| 842.4862  | 2 | 842.4862  | 0.0001  | 2    | 10   | 0 | 54.23  | 34 |
| 1180.6927 | 2 | 1180.6928 | -0.0001 | 129  | 139  | 0 | 82.26  | 30 |
| 1549.7545 | 2 | 1549.7559 | -0.0013 | 115  | 128  | 0 | 84.08  | 38 |
| 759.4283  | 2 | 759.4279  | 0.0004  | 23   | 30   | 0 | 40.89  | 40 |
| 943.5337  | 2 | 943.5338  | -0.0001 | 246  | 253  | 0 | 41.25  | 37 |
| 963.5391  | 2 | 963.5389  | 0.0002  | 222  | 230  | 0 | 54.3   | 34 |
| 1224.727  | 2 | 1224.7264 | 0.0006  | 40   | 49   | 0 | 35.28  | 31 |
| 1365.6704 | 2 | 1365.6711 | -0.0007 | 175  | 187  | 0 | 85.32  | 38 |
| 1614.8398 | 2 | 1614.8399 | -0.0001 | 26   | 40   | 0 | 99.35  | 37 |
| 1775.8694 | 2 | 1775.8724 | -0.003  | 41   | 57   | 0 | 85.51  | 38 |
| 999.5701  | 2 | 999.5713  | -0.0012 | 268  | 276  | 0 | 43.27  | 36 |
| 1270.6978 | 2 | 1270.6993 | -0.0015 | 93   | 104  | 0 | 65.52  | 36 |
| 1284.7111 | 2 | 1284.7112 | 0       | 177  | 188  | 0 | 49.76  | 35 |
| 1414.7557 | 2 | 1414.7569 | -0.0012 | 254  | 267  | 0 | 99.18  | 37 |
| 1087.5696 | 2 | 1087.5696 | 0.0001  | 377  | 386  | 0 | 42.58  | 38 |
| 1241.6287 | 2 | 1241.6292 | -0.0005 | 412  | 422  | 0 | 72.71  | 36 |
| 1481.8608 | 2 | 1481.8606 | 0.0002  | 278  | 291  | 0 | 85.61  | 29 |
| 1690.8195 | 3 | 1690.8209 | -0.0014 | 254  | 268  | 0 | 43.6   | 38 |
| 1085.5863 | 2 | 1085.5869 | -0.0006 | 877  | 885  | 0 | 41.04  | 36 |
| 1524.8985 | 2 | 1524.8988 | -0.0002 | 1069 | 1083 | 0 | 84.91  | 29 |
| 1940.051  | 2 | 1940.052  | -0.001  | 810  | 827  | 0 | 85.61  | 34 |
| 1465.7559 | 2 | 1465.7565 | -0.0006 | 97   | 108  | 0 | 71.86  | 37 |
| 1567.7165 | 2 | 1567.7154 | 0.0011  | 83   | 96   | 0 | 61.4   | 35 |
| 1986.979  | 2 | 1986.9795 | -0.0005 | 234  | 249  | 0 | 80.7   | 37 |
| 1757.9779 | 2 | 1757.9774 | 0.0005  | 73   | 88   | 0 | 117.98 | 34 |
| 2010.1446 | 3 | 2010.1441 | 0.0005  | 56   | 72   | 0 | 49.6   | 30 |

|           |   |           |         |     |     |   |        |    |
|-----------|---|-----------|---------|-----|-----|---|--------|----|
| 943.4761  | 2 | 943.4763  | -0.0002 | 77  | 84  | 0 | 40.15  | 34 |
| 1042.6022 | 2 | 1042.6023 | -0.0001 | 16  | 26  | 0 | 38.71  | 35 |
| 1079.5611 | 2 | 1079.5611 | -0.0001 | 44  | 53  | 0 | 57.83  | 37 |
| 1209.6348 | 2 | 1209.6353 | -0.0006 | 132 | 142 | 0 | 65.88  | 36 |
| 1332.7445 | 2 | 1332.7402 | 0.0043  | 85  | 97  | 0 | 84.84  | 34 |
| 1044.5267 | 2 | 1044.5274 | -0.0007 | 375 | 383 | 0 | 45.49  | 37 |
| 1061.5406 | 2 | 1061.5393 | 0.0013  | 285 | 293 | 0 | 41.49  | 38 |
| 1087.639  | 2 | 1087.639  | 0       | 150 | 158 | 0 | 61.47  | 33 |
| 1688.8004 | 2 | 1688.8005 | -0.0001 | 403 | 417 | 0 | 84.07  | 36 |
| 2199.061  | 2 | 2199.0616 | -0.0006 | 194 | 213 | 0 | 56.33  | 37 |
| 1265.7346 | 2 | 1265.7343 | 0.0003  | 343 | 353 | 0 | 44.37  | 30 |
| 1512.8147 | 2 | 1512.8147 | -0.0001 | 259 | 272 | 0 | 121.91 | 35 |
| 1702.8324 | 2 | 1702.8348 | -0.0024 | 327 | 342 | 0 | 39.3   | 37 |
| 1243.7122 | 2 | 1243.7136 | -0.0013 | 691 | 702 | 0 | 63.7   | 35 |
| 1483.9014 | 2 | 1483.9014 | 0.0001  | 433 | 446 | 0 | 42.55  | 25 |
| 1857.9297 | 3 | 1857.9295 | 0.0003  | 540 | 555 | 0 | 46.49  | 37 |
| 1975.9391 | 2 | 1975.9374 | 0.0017  | 84  | 100 | 0 | 78.65  | 37 |
| 951.5009  | 2 | 951.5025  | -0.0016 | 76  | 84  | 0 | 44.4   | 35 |
| 1425.7563 | 2 | 1425.7576 | -0.0012 | 132 | 144 | 0 | 66.21  | 36 |
| 1759.8934 | 2 | 1759.8952 | -0.0017 | 9   | 25  | 0 | 95.64  | 37 |
| 871.4763  | 2 | 871.4763  | 0       | 608 | 615 | 0 | 43.25  | 35 |
| 1518.7833 | 2 | 1518.7831 | 0.0003  | 240 | 252 | 0 | 80.39  | 38 |
| 1551.8253 | 3 | 1551.8257 | -0.0003 | 24  | 37  | 0 | 40.51  | 35 |
| 2089.0501 | 3 | 2088.0487 | 1.0014  | 217 | 234 | 1 | 72.54  | 37 |
| 2216.0816 | 4 | 2215.0804 | 1.0012  | 69  | 87  | 1 | 49.68  | 37 |
| 2585.2742 | 2 | 2585.2749 | -0.0006 | 88  | 111 | 0 | 124.58 | 37 |
| 980.5698  | 2 | 980.5695  | 0.0003  | 100 | 107 | 0 | 36.89  | 31 |
| 1064.5497 | 2 | 1064.5502 | -0.0005 | 55  | 63  | 0 | 61.05  | 37 |
| 1066.6127 | 2 | 1066.6135 | -0.0008 | 64  | 72  | 0 | 63.15  | 33 |
| 1762.8803 | 2 | 1762.8836 | -0.0033 | 12  | 27  | 0 | 77.44  | 38 |
| 754.5067  | 2 | 754.5065  | 0.0002  | 102 | 107 | 0 | 42.9   | 20 |
| 773.5167  | 2 | 773.5163  | 0.0004  | 83  | 88  | 0 | 43.35  | 22 |
| 1146.6033 | 2 | 1146.6033 | 0       | 231 | 239 | 0 | 56.41  | 39 |
| 1505.7663 | 2 | 1505.7667 | -0.0004 | 197 | 208 | 0 | 58.14  | 38 |
| 2428.256  | 4 | 2428.2573 | -0.0013 | 176 | 196 | 0 | 52.1   | 36 |
| 1340.7553 | 2 | 1340.7565 | -0.0011 | 511 | 523 | 0 | 78.53  | 34 |
| 1630.8684 | 2 | 1630.8679 | 0.0006  | 227 | 242 | 0 | 92.16  | 36 |
| 1228.5714 | 2 | 1228.5724 | -0.001  | 499 | 509 | 0 | 45.78  | 35 |
| 1228.7174 | 2 | 1228.718  | -0.0006 | 593 | 603 | 0 | 43.09  | 34 |
| 1395.7244 | 2 | 1395.7245 | -0.0001 | 604 | 616 | 0 | 50.61  | 37 |
| 1885.9156 | 2 | 1885.917  | -0.0014 | 709 | 725 | 0 | 72.85  | 37 |
| 1982.0208 | 3 | 1982.0208 | 0.0001  | 405 | 423 | 0 | 50.86  | 36 |
| 1256.6976 | 2 | 1256.6976 | 0       | 167 | 177 | 0 | 58.62  | 36 |
| 1289.6094 | 2 | 1289.6099 | -0.0005 | 425 | 436 | 0 | 71.03  | 36 |
| 2249.2868 | 2 | 2249.2882 | -0.0014 | 289 | 310 | 0 | 53.21  | 27 |
| 1847.9612 | 2 | 1847.9629 | -0.0017 | 59  | 75  | 0 | 109.53 | 37 |
| 1879.7479 | 3 | 1879.7499 | -0.002  | 206 | 222 | 0 | 27.67  | 25 |
| 3139.6261 | 3 | 3138.6231 | 1.003   | 159 | 187 | 0 | 40.34  | 34 |
| 939.5758  | 2 | 939.5753  | 0.0005  | 125 | 132 | 0 | 51.68  | 28 |
| 2080.9262 | 3 | 2080.9273 | -0.0011 | 107 | 124 | 0 | 49.59  | 34 |
| 2192.0208 | 2 | 2192.0242 | -0.0033 | 140 | 159 | 0 | 88.13  | 36 |
| 1056.654  | 2 | 1056.6543 | -0.0003 | 282 | 291 | 0 | 72.5   | 29 |
| 1088.5438 | 2 | 1088.5462 | -0.0024 | 292 | 302 | 0 | 50.37  | 38 |
| 1127.594  | 2 | 1127.5934 | 0.0005  | 265 | 275 | 0 | 61.76  | 35 |
| 1130.5561 | 2 | 1130.5567 | -0.0007 | 227 | 236 | 0 | 44.56  | 36 |
| 1053.5553 | 2 | 1053.5567 | -0.0014 | 106 | 116 | 0 | 74.17  | 35 |
| 1153.6446 | 2 | 1153.6455 | -0.0009 | 11  | 21  | 0 | 56.1   | 32 |
| 1442.7225 | 2 | 1442.7253 | -0.0027 | 128 | 140 | 0 | 67.91  | 37 |

|           |   |           |         |      |      |   |        |    |
|-----------|---|-----------|---------|------|------|---|--------|----|
| 899.5072  | 2 | 899.5076  | -0.0004 | 114  | 123  | 0 | 39.32  | 34 |
| 2004.9606 | 2 | 2004.9609 | -0.0002 | 16   | 35   | 0 | 126.7  | 37 |
| 1003.5817 | 2 | 1003.5814 | 0.0003  | 471  | 479  | 0 | 62.01  | 34 |
| 1880.9327 | 2 | 1880.9342 | -0.0015 | 445  | 460  | 0 | 102.39 | 37 |
| 1319.6185 | 2 | 1319.6205 | -0.0019 | 880  | 893  | 0 | 106.47 | 36 |
| 2358.2476 | 3 | 2358.2471 | 0.0005  | 946  | 966  | 1 | 50.56  | 35 |
| 1510.8358 | 3 | 1510.8355 | 0.0003  | 174  | 188  | 0 | 55.96  | 34 |
| 2627.3097 | 3 | 2626.3027 | 1.007   | 120  | 143  | 0 | 104.97 | 37 |
| 1109.498  | 2 | 1109.4989 | -0.0009 | 690  | 699  | 0 | 57.14  | 35 |
| 1155.6212 | 2 | 1155.6248 | -0.0036 | 942  | 953  | 0 | 38.32  | 34 |
| 1234.6305 | 2 | 1234.6306 | -0.0001 | 1077 | 1087 | 0 | 39.99  | 39 |
| 1324.6627 | 2 | 1324.6623 | 0.0004  | 1041 | 1052 | 0 | 55.26  | 37 |
| 1640.7506 | 3 | 1640.7503 | 0.0003  | 771  | 784  | 1 | 37.33  | 35 |
| 3064.6714 | 3 | 3063.6564 | 1.015   | 1171 | 1203 | 0 | 50.07  | 29 |
| 839.5115  | 2 | 839.5116  | -0.0001 | 354  | 361  | 0 | 40.99  | 28 |
| 1064.5905 | 2 | 1064.5906 | -0.0001 | 15   | 23   | 0 | 52.56  | 34 |
| 1442.6546 | 2 | 1442.6565 | -0.0019 | 69   | 80   | 0 | 67.64  | 34 |
| 3347.6907 | 4 | 3346.6908 | 0.9999  | 269  | 297  | 1 | 55.02  | 35 |
| 1138.7072 | 2 | 1138.7074 | -0.0002 | 831  | 840  | 0 | 68.19  | 26 |
| 1414.7826 | 2 | 1414.782  | 0.0006  | 718  | 729  | 0 | 88.7   | 35 |
| 2626.0497 | 3 | 2626.053  | -0.0033 | 42   | 65   | 0 | 73.82  | 25 |
| 2901.2148 | 3 | 2901.2164 | -0.0015 | 40   | 65   | 1 | 68.02  | 29 |
| 1105.7585 | 2 | 1105.7587 | -0.0002 | 381  | 390  | 0 | 48.89  | 20 |
| 1752.9669 | 2 | 1752.9662 | 0.0007  | 454  | 469  | 0 | 101.47 | 33 |
| 1255.7499 | 2 | 1255.75   | 0       | 4357 | 4368 | 0 | 91.61  | 32 |
| 1998.1158 | 3 | 1998.115  | 0.0008  | 1319 | 1336 | 0 | 54.32  | 31 |
| 1202.6758 | 2 | 1202.6772 | -0.0013 | 305  | 315  | 0 | 68.51  | 35 |
| 1626.808  | 2 | 1626.8076 | 0.0004  | 330  | 343  | 0 | 91.85  | 37 |
| 953.5913  | 2 | 953.591   | 0.0004  | 389  | 397  | 0 | 32.63  | 29 |
| 1205.5715 | 2 | 1205.5717 | -0.0002 | 435  | 444  | 0 | 54.53  | 37 |
| 2220.0588 | 2 | 2220.06   | -0.0012 | 300  | 322  | 0 | 94.73  | 37 |
| 1242.7174 | 2 | 1242.7183 | -0.001  | 194  | 205  | 0 | 73.59  | 34 |
| 1391.6534 | 2 | 1391.6537 | -0.0003 | 43   | 54   | 0 | 82.45  | 36 |
| 1403.6524 | 2 | 1403.6528 | -0.0004 | 441  | 453  | 0 | 89.02  | 35 |
| 1411.7418 | 2 | 1411.7419 | -0.0001 | 467  | 480  | 0 | 66.08  | 36 |
| 939.6114  | 2 | 939.6117  | -0.0002 | 861  | 868  | 0 | 49.9   | 22 |
| 2139.1567 | 3 | 2139.1576 | -0.0008 | 1496 | 1515 | 0 | 82.41  | 34 |
| 1091.5983 | 2 | 1091.5975 | 0.0008  | 6    | 15   | 0 | 46.8   | 36 |
| 3074.5585 | 3 | 3074.5594 | -0.0009 | 194  | 222  | 0 | 107.96 | 36 |
| 1284.7702 | 2 | 1284.7693 | 0.0008  | 2912 | 2922 | 0 | 51.82  | 30 |
| 1550.9068 | 2 | 1550.9072 | -0.0004 | 1927 | 1940 | 0 | 94.3   | 27 |
| 1194.6397 | 2 | 1194.6397 | 0       | 341  | 351  | 0 | 95.89  | 36 |
| 2503.2335 | 3 | 2503.2329 | 0.0005  | 725  | 747  | 0 | 55.66  | 37 |
| 996.608   | 2 | 996.608   | 0       | 10   | 18   | 0 | 41.49  | 28 |
| 2162.1112 | 2 | 2162.1106 | 0.0006  | 198  | 216  | 0 | 56.21  | 36 |
| 2579.3002 | 2 | 2579.3006 | -0.0004 | 152  | 173  | 0 | 57.28  | 37 |
| 1122.5609 | 2 | 1122.5591 | 0.0019  | 610  | 620  | 0 | 41.45  | 37 |
| 1232.6881 | 2 | 1232.6877 | 0.0004  | 397  | 408  | 0 | 52.63  | 36 |
| 1881.0978 | 2 | 1881.0975 | 0.0003  | 147  | 164  | 0 | 69.34  | 27 |
| 1268.7703 | 2 | 1268.7704 | -0.0001 | 155  | 165  | 0 | 69.76  | 29 |
| 1395.6914 | 2 | 1395.6922 | -0.0008 | 375  | 386  | 0 | 79.39  | 37 |
| 980.5093  | 2 | 980.5113  | -0.0021 | 67   | 74   | 0 | 42.75  | 37 |
| 1104.5844 | 2 | 1104.5849 | -0.0005 | 78   | 87   | 0 | 44.96  | 38 |
| 1531.8229 | 2 | 1531.8246 | -0.0017 | 38   | 51   | 0 | 94.8   | 37 |
| 1426.7917 | 2 | 1426.7919 | -0.0002 | 260  | 272  | 0 | 105.81 | 35 |
| 1578.8009 | 2 | 1578.7963 | 0.0046  | 362  | 376  | 0 | 41.02  | 38 |
| 3201.6715 | 3 | 3201.6731 | -0.0016 | 54   | 84   | 0 | 37.87  | 33 |
| 1153.7179 | 2 | 1153.7183 | -0.0004 | 129  | 139  | 0 | 76.7   | 27 |

|           |   |           |         |     |     |   |       |    |
|-----------|---|-----------|---------|-----|-----|---|-------|----|
| 1274.6103 | 2 | 1274.6102 | 0.0001  | 58  | 69  | 0 | 70.05 | 37 |
| 1471.7792 | 2 | 1471.7783 | 0.0009  | 28  | 40  | 0 | 84.28 | 37 |
| 2406.2938 | 3 | 2406.2934 | 0.0004  | 46  | 65  | 1 | 58.13 | 33 |
| 1158.7376 | 2 | 1158.7376 | 0       | 442 | 452 | 0 | 89.21 | 20 |
| 1381.7695 | 2 | 1381.7678 | 0.0018  | 118 | 132 | 0 | 49.52 | 33 |
| 1488.8192 | 2 | 1488.8188 | 0.0004  | 26  | 38  | 0 | 92.79 | 36 |
| 2123.1436 | 2 | 2123.1449 | -0.0012 | 177 | 194 | 0 | 48.24 | 34 |
| 1055.5977 | 2 | 1055.5975 | 0.0003  | 188 | 197 | 0 | 45.14 | 33 |
| 1739.9583 | 2 | 1739.957  | 0.0013  | 320 | 336 | 0 | 97.23 | 33 |
| 979.5336  | 2 | 979.5338  | -0.0002 | 383 | 391 | 0 | 42.3  | 35 |
| 1293.6532 | 2 | 1293.6466 | 0.0066  | 132 | 144 | 0 | 60.13 | 38 |
| 1987.9575 | 3 | 1987.9581 | -0.0006 | 116 | 131 | 0 | 50.64 | 37 |
| 2841.4806 | 3 | 2841.4813 | -0.0007 | 485 | 510 | 0 | 50.87 | 35 |
| 1072.6235 | 2 | 1072.6241 | -0.0005 | 42  | 52  | 0 | 52.07 | 35 |
| 1334.7667 | 2 | 1334.767  | -0.0003 | 276 | 287 | 0 | 69.05 | 31 |
| 1972.1259 | 4 | 1972.1258 | 0       | 17  | 33  | 0 | 32.3  | 29 |
| 3286.7715 | 4 | 3286.7714 | 0.0001  | 108 | 136 | 1 | 41.83 | 31 |
| 1235.7278 | 2 | 1235.7278 | 0       | 229 | 239 | 0 | 67.57 | 28 |
| 1239.6826 | 2 | 1239.6823 | 0.0003  | 192 | 202 | 0 | 46.21 | 34 |
| 1906.1033 | 3 | 1906.104  | -0.0007 | 128 | 146 | 1 | 49.2  | 26 |
| 1297.7486 | 2 | 1297.7493 | -0.0007 | 617 | 628 | 0 | 49.72 | 32 |
| 1424.8025 | 2 | 1424.8027 | -0.0002 | 661 | 672 | 0 | 72.07 | 33 |
| 2319.2024 | 3 | 2319.1998 | 0.0025  | 581 | 600 | 0 | 45.54 | 36 |
| 1159.619  | 2 | 1159.6197 | -0.0007 | 50  | 61  | 0 | 78.3  | 38 |
| 1165.5981 | 2 | 1165.5979 | 0.0002  | 66  | 76  | 0 | 65.53 | 37 |
| 958.5346  | 2 | 958.5335  | 0.0011  | 519 | 527 | 0 | 43.66 | 37 |
| 1562.7143 | 2 | 1561.7123 | 1.002   | 355 | 367 | 0 | 96.28 | 36 |
| 1331.6496 | 2 | 1331.6503 | -0.0007 | 27  | 37  | 0 | 42.11 | 37 |
| 1449.7531 | 2 | 1449.7537 | -0.0006 | 74  | 85  | 0 | 98.03 | 38 |
| 1788.0285 | 2 | 1788.0284 | 0.0001  | 760 | 775 | 0 | 80.67 | 29 |
| 2204.2875 | 3 | 2204.2892 | -0.0018 | 376 | 395 | 1 | 29.6  | 24 |
| 1225.7021 | 2 | 1225.703  | -0.0009 | 469 | 480 | 0 | 77.17 | 33 |
| 1367.6201 | 2 | 1367.6214 | -0.0012 | 323 | 333 | 0 | 52.98 | 36 |
| 1138.572  | 2 | 1138.5731 | -0.0011 | 973 | 981 | 0 | 54.62 | 36 |
| 1172.6653 | 2 | 1172.6652 | 0.0001  | 922 | 931 | 0 | 58.01 | 36 |
| 1872.8406 | 2 | 1872.8391 | 0.0015  | 582 | 597 | 0 | 48.15 | 34 |
| 1583.8071 | 2 | 1583.8083 | -0.0012 | 226 | 239 | 0 | 50.84 | 37 |
| 1598.8874 | 2 | 1598.8879 | -0.0006 | 351 | 365 | 0 | 78.71 | 34 |
| 1463.7087 | 2 | 1463.7085 | 0.0002  | 605 | 615 | 0 | 57.38 | 37 |
| 2371.142  | 3 | 2371.1406 | 0.0014  | 630 | 650 | 0 | 50.64 | 37 |
| 1210.7274 | 2 | 1210.7285 | -0.0011 | 662 | 672 | 0 | 49.7  | 29 |
| 1282.6302 | 2 | 1282.6306 | -0.0004 | 378 | 389 | 0 | 60.17 | 37 |
| 1629.8801 | 2 | 1629.8807 | -0.0005 | 614 | 626 | 0 | 45.9  | 36 |
| 2362.26   | 2 | 2362.2607 | -0.0006 | 86  | 106 | 0 | 55.91 | 34 |
| 2561.3913 | 3 | 2561.3927 | -0.0015 | 84  | 106 | 1 | 51.18 | 32 |
| 1074.5669 | 2 | 1074.5669 | 0       | 181 | 190 | 1 | 68.33 | 38 |
| 1352.8279 | 2 | 1352.8279 | 0.0001  | 226 | 237 | 0 | 56.09 | 26 |
| 1159.6712 | 2 | 1159.6713 | -0.0001 | 148 | 158 | 0 | 86.77 | 34 |
| 2940.5295 | 3 | 2940.5307 | -0.0011 | 321 | 348 | 0 | 35.42 | 34 |
| 974.5543  | 2 | 974.5549  | -0.0006 | 168 | 178 | 0 | 42.36 | 36 |
| 1948.991  | 2 | 1948.9894 | 0.0015  | 262 | 277 | 0 | 79.89 | 37 |
| 1128.6292 | 2 | 1128.6291 | 0       | 314 | 323 | 0 | 45.25 | 36 |
| 1506.7464 | 2 | 1506.7487 | -0.0023 | 167 | 179 | 0 | 67.33 | 38 |
| 1441.7485 | 3 | 1441.7486 | -0.0001 | 311 | 322 | 0 | 43.63 | 36 |
| 2135.0682 | 2 | 2135.0674 | 0.0009  | 180 | 198 | 0 | 64.11 | 37 |
| 1067.4957 | 2 | 1067.4957 | 0       | 112 | 120 | 0 | 44.76 | 35 |
| 2851.4923 | 3 | 2851.4967 | -0.0044 | 227 | 253 | 0 | 76.46 | 34 |
| 1038.6074 | 2 | 1038.6073 | 0.0001  | 64  | 72  | 0 | 37.41 | 29 |

|           |   |           |         |     |     |   |       |    |
|-----------|---|-----------|---------|-----|-----|---|-------|----|
| 1322.6543 | 2 | 1322.6605 | -0.0063 | 429 | 439 | 0 | 66.65 | 38 |
| 2319.1925 | 3 | 2319.1933 | -0.0008 | 245 | 265 | 0 | 42.67 | 36 |
| 1086.5682 | 2 | 1086.5709 | -0.0027 | 47  | 55  | 0 | 40    | 36 |
| 1132.649  | 2 | 1132.6492 | -0.0002 | 88  | 97  | 0 | 71.25 | 33 |
| 1102.5486 | 2 | 1102.5506 | -0.002  | 15  | 23  | 1 | 51.38 | 37 |
| 1825.0394 | 2 | 1825.0383 | 0.0011  | 101 | 117 | 0 | 71.9  | 31 |
| 981.5649  | 2 | 981.5648  | 0.0002  | 560 | 567 | 0 | 58.72 | 32 |
| 1295.7551 | 2 | 1295.7561 | -0.0011 | 632 | 643 | 0 | 59.19 | 31 |
| 1357.7028 | 2 | 1357.7024 | 0.0004  | 130 | 141 | 0 | 70.71 | 37 |
| 1697.7678 | 2 | 1697.7685 | -0.0007 | 432 | 445 | 0 | 45.65 | 35 |
| 1140.5553 | 2 | 1140.5539 | 0.0014  | 151 | 159 | 0 | 42.48 | 35 |
| 1151.5886 | 2 | 1151.5896 | -0.001  | 162 | 171 | 0 | 68.78 | 36 |
| 1200.6235 | 2 | 1200.6237 | -0.0003 | 111 | 121 | 0 | 45.23 | 37 |
| 1406.7282 | 2 | 1406.7293 | -0.0011 | 90  | 102 | 0 | 77.49 | 38 |
| 1441.7485 | 3 | 1441.7486 | -0.0001 | 311 | 322 | 0 | 43.63 | 36 |
| 1239.6826 | 2 | 1239.6823 | 0.0003  | 203 | 213 | 0 | 46.21 | 34 |
| 1251.7225 | 2 | 1251.7227 | -0.0002 | 240 | 250 | 0 | 43.61 | 30 |
| 1906.1033 | 3 | 1906.104  | -0.0007 | 139 | 157 | 1 | 49.2  | 26 |
| 1369.7196 | 3 | 1369.7202 | -0.0006 | 209 | 221 | 1 | 36.8  | 36 |
| 3113.665  | 3 | 3113.6648 | 0.0002  | 450 | 478 | 0 | 40.69 | 32 |
| 3448.9045 | 3 | 3448.9069 | -0.0024 | 171 | 202 | 1 | 45.34 | 27 |
| 1012.5678 | 2 | 1012.5665 | 0.0013  | 43  | 51  | 0 | 38.19 | 33 |
| 1697.8151 | 2 | 1697.8148 | 0.0003  | 52  | 66  | 0 | 71.85 | 37 |
| 1145.6047 | 2 | 1145.604  | 0.0006  | 50  | 61  | 0 | 53    | 38 |
| 1165.5981 | 2 | 1165.5979 | 0.0002  | 66  | 76  | 0 | 65.53 | 37 |
| 1100.6077 | 2 | 1100.6077 | 0       | 200 | 209 | 0 | 75.42 | 36 |
| 2079.8506 | 3 | 2079.852  | -0.0014 | 224 | 241 | 0 | 34.74 | 28 |
| 1037.5611 | 2 | 1037.5618 | -0.0006 | 405 | 414 | 0 | 37.58 | 35 |
| 1094.5894 | 2 | 1094.5873 | 0.0021  | 32  | 40  | 0 | 49.41 | 36 |
| 2627.1676 | 3 | 2626.1783 | 0.9892  | 54  | 80  | 0 | 42.69 | 34 |
| 2886.3606 | 3 | 2886.3613 | -0.0007 | 456 | 482 | 0 | 37.73 | 36 |
| 1380.8454 | 3 | 1380.8453 | 0.0001  | 43  | 55  | 1 | 44.52 | 25 |
| 1391.6236 | 2 | 1391.6239 | -0.0002 | 28  | 39  | 0 | 36.35 | 34 |
| 1915.0202 | 3 | 1915.0203 | -0.0001 | 77  | 93  | 0 | 54.42 | 36 |
| 1252.6608 | 2 | 1252.6663 | -0.0055 | 58  | 69  | 0 | 45.14 | 36 |
| 1577.7422 | 2 | 1577.7436 | -0.0014 | 41  | 52  | 0 | 61.73 | 36 |
| 934.5122  | 2 | 934.5124  | -0.0001 | 242 | 249 | 0 | 38.53 | 35 |
| 1128.5711 | 2 | 1128.5717 | -0.0006 | 255 | 264 | 0 | 67.8  | 35 |
| 1448.7002 | 3 | 1448.7008 | -0.0007 | 221 | 233 | 0 | 39.75 | 37 |
| 1803.9518 | 2 | 1803.9519 | -0.0001 | 176 | 190 | 0 | 70.46 | 37 |
| 1216.63   | 2 | 1216.6299 | 0       | 149 | 160 | 0 | 64.86 | 38 |
| 3073.7413 | 3 | 3073.7427 | -0.0014 | 120 | 148 | 0 | 38.04 | 23 |
| 1114.6595 | 2 | 1114.6598 | -0.0002 | 838 | 848 | 0 | 50.13 | 33 |
| 1227.6722 | 3 | 1227.6724 | -0.0002 | 411 | 422 | 0 | 37.06 | 36 |
| 1612.8526 | 3 | 1612.8573 | -0.0047 | 646 | 659 | 0 | 45.7  | 36 |
| 1090.6024 | 2 | 1090.6022 | 0.0002  | 17  | 25  | 0 | 40.11 | 35 |
| 1402.7819 | 2 | 1402.782  | -0.0001 | 144 | 155 | 0 | 64.31 | 35 |
| 1211.6863 | 2 | 1211.6874 | -0.0011 | 453 | 464 | 0 | 48.77 | 33 |
| 1367.6201 | 2 | 1367.6214 | -0.0012 | 316 | 326 | 0 | 52.98 | 36 |
| 1266.7904 | 2 | 1266.7911 | -0.0007 | 72  | 84  | 0 | 54.16 | 23 |
| 1686.796  | 3 | 1686.7962 | -0.0002 | 101 | 115 | 0 | 46.45 | 37 |
| 1383.7708 | 2 | 1383.7722 | -0.0013 | 264 | 278 | 0 | 39.57 | 34 |
| 1455.7725 | 2 | 1455.7722 | 0.0003  | 387 | 399 | 0 | 64.97 | 36 |
| 943.4761  | 2 | 943.4763  | -0.0002 | 76  | 83  | 0 | 40.15 | 34 |
| 1079.5611 | 2 | 1079.5611 | -0.0001 | 43  | 52  | 0 | 57.83 | 37 |
| 1731.9564 | 3 | 1731.9559 | 0.0005  | 165 | 179 | 0 | 44.04 | 34 |
| 994.6795  | 2 | 994.679   | 0.0005  | 198 | 206 | 0 | 41.01 | 20 |
| 2730.4019 | 3 | 2730.4004 | 0.0015  | 93  | 117 | 0 | 54.93 | 36 |

|            |           |             |           |           |         |          |           |           |
|------------|-----------|-------------|-----------|-----------|---------|----------|-----------|-----------|
| 1330.6798  | 2         | 1330.6803   | -0.0004   | 223       | 234     | 0        | 61.36     | 38        |
| 1717.0753  | 3         | 1717.0753   | 0         | 316       | 331     | 0        | 39.16     | 20        |
| 957.5246   | 2         | 957.5243    | 0.0003    | 6         | 13      | 1        | 50.25     | 36        |
| 1075.56    | 2         | 1075.5622   | -0.0022   | 260       | 270     | 0        | 55.87     | 39        |
| 1046.5759  | 2         | 1046.576    | -0.0001   | 72        | 80      | 0        | 51.82     | 37        |
| 1318.7068  | 2         | 1318.7067   | 0         | 141       | 151     | 0        | 39.4      | 37        |
| 2941.5059  | 3         | 2941.5073   | -0.0014   | 85        | 109     | 1        | 43.15     | 35        |
| 1201.682   | 2         | 1201.6819   | 0.0001    | 387       | 397     | 0        | 58        | 36        |
| 1729.909   | 2         | 1729.908    | 0.0011    | 1392      | 1405    | 0        | 39.14     | 37        |
| 1071.6442  | 2         | 1071.6441   | 0.0002    | 934       | 943     | 0        | 48.23     | 34        |
| 1227.6722  | 3         | 1227.6724   | -0.0002   | 411       | 422     | 0        | 37.06     | 36        |
| 1612.8526  | 3         | 1612.8573   | -0.0047   | 646       | 659     | 0        | 45.7      | 36        |
| 1084.6125  | 2         | 1084.6128   | -0.0003   | 278       | 287     | 0        | 51.55     | 34        |
| 1259.5414  | 2         | 1259.5419   | -0.0004   | 304       | 315     | 0        | 48.34     | 31        |
| 956.5537   | 2         | 956.5542    | -0.0006   | 126       | 133     | 0        | 45.34     | 34        |
| 1144.5907  | 2         | 1144.591    | -0.0003   | 134       | 142     | 0        | 47.66     | 37        |
| 2882.4256  | 2         | 2882.4284   | -0.0028   | 94        | 120     | 0        | 37.55     | 37        |
| 804.4502   | 2         | 804.4494    | 0.0008    | 309       | 315     | 0        | 42.06     | 37        |
| 1072.4832  | 2         | 1072.4825   | 0.0007    | 280       | 288     | 0        | 45.91     | 32        |
| 1216.6813  | 2         | 1216.6815   | -0.0003   | 183       | 193     | 0        | 41.44     | 36        |
| 1678.9405  | 3         | 1678.9406   | -0.0001   | 61        | 76      | 0        | 36.58     | 32        |
| 2417.2056  | 3         | 2417.2061   | -0.0005   | 745       | 767     | 0        | 44.87     | 37        |
| 2573.3073  | 3         | 2573.3072   | 0.0001    | 745       | 768     | 1        | 48.65     | 36        |
| 1533.8549  | 2         | 1533.8555   | -0.0006   | 542       | 554     | 0        | 60.15     | 34        |
| 2366.3816  | 3         | 2366.3824   | -0.0008   | 329       | 352     | 0        | 31.06     | 21        |
| 970.581    | 2         | 970.5811    | -0.0001   | 98        | 106     | 0        | 38.36     | 34        |
| 1230.6116  | 2         | 1230.6139   | -0.0023   | 33        | 42      | 0        | 59.08     | 37        |
| 1292.6598  | 2         | 1292.6612   | -0.0014   | 247       | 257     | 0        | 41.75     | 38        |
| 1367.6201  | 2         | 1367.6214   | -0.0013   | 258       | 268     | 0        | 52.98     | 36        |
| 1361.6976  | 2         | 1361.698    | -0.0004   | 169       | 179     | 0        | 40.07     | 38        |
| 1387.6914  | 2         | 1387.6943   | -0.0029   | 123       | 135     | 0        | 53.12     | 37        |
| 916.444    | 2         | 916.4443    | -0.0003   | 490       | 496     | 0        | 48.19     | 35        |
| 1258.6518  | 2         | 1258.6517   | 0.0001    | 335       | 345     | 0        | 44.32     | 38        |
| 1499.8957  | 2         | 1499.8963   | -0.0006   | 131       | 144     | 0        | 40.44     | 27        |
| 1857.9297  | 3         | 1857.9295   | 0.0003    | 238       | 253     | 0        | 46.49     | 37        |
| 1109.6273  | 2         | 1109.6273   | 0         | 507       | 515     | 0        | 36.39     | 32        |
| 1279.6811  | 2         | 1279.6812   | -0.0001   | 192       | 203     | 0        | 47.43     | 36        |
| 868.5488   | 2         | 868.5494    | -0.0006   | 10        | 17      | 0        | 30.45     | 25        |
| 1173.6239  | 2         | 1173.6241   | -0.0002   | 93        | 103     | 0        | 53.8      | 38        |
| 1181.6449  | 2         | 1181.6444   | 0.0004    | 23        | 32      | 0        | 36.21     | 35        |
| 3078.5245  | 3         | 3078.5294   | -0.0049   | 134       | 161     | 1        | 49.64     | 37        |
| 770.4535   | 2         | 770.4538    | -0.0002   | 51        | 57      | 0        | 35.16     | 33        |
| 1522.7184  | 3         | 1522.7198   | -0.0014   | 92        | 104     | 0        | 50.49     | 37        |
| 949.5231   | 2         | 949.5233    | -0.0002   | 92        | 99      | 0        | 37.45     | 35        |
| 2372.193   | 3         | 2372.1934   | -0.0004   | 118       | 139     | 0        | 39.54     | 37        |
| 2774.5106  | 3         | 2774.5113   | -0.0007   | 342       | 367     | 0        | 33.06     | 31        |
| 770.4535   | 2         | 770.4538    | -0.0002   | 51        | 57      | 0        | 35.16     | 33        |
| 1506.7235  | 3         | 1506.7249   | -0.0014   | 92        | 104     | 0        | 41.23     | 37        |
| 997.58     | 2         | 997.5808    | -0.0008   | 394       | 402     | 1        | 31.46     | 30        |
| 1642.9542  | 2         | 1642.9545   | -0.0004   | 828       | 842     | 0        | 31.39     | 29        |
| pep_exp_mr | pep_exp_z | pep_calc_mr | pep_delta | pep_start | pep_end | pep_miss | pep_score | pep_ident |
| 975.4689   | 2         | 975.4695    | -0.0007   | 351       | 359     | 0        | 77.66     | 37        |
| 1026.5479  | 2         | 1026.5498   | -0.0019   | 310       | 318     | 0        | 71.82     | 34        |
| 1064.4188  | 2         | 1064.4201   | -0.0013   | 298       | 306     | 0        | 33.07     | 26        |
| 1138.6858  | 2         | 1138.6862   | -0.0004   | 253       | 262     | 0        | 73.82     | 28        |
| 1145.5818  | 2         | 1145.5829   | -0.0011   | 242       | 251     | 0        | 44.4      | 38        |
| 1230.5696  | 2         | 1230.5703   | -0.0007   | 381       | 390     | 0        | 71.7      | 35        |
| 1273.6776  | 2         | 1273.6779   | -0.0003   | 242       | 252     | 1        | 44.7      | 38        |

|           |   |           |         |     |     |   |        |    |
|-----------|---|-----------|---------|-----|-----|---|--------|----|
| 1370.6757 | 2 | 1370.6765 | -0.0008 | 380 | 390 | 1 | 52.99  | 36 |
| 1433.6391 | 2 | 1433.6393 | -0.0003 | 163 | 174 | 0 | 95.58  | 34 |
| 1477.653  | 2 | 1477.6541 | -0.001  | 325 | 336 | 0 | 73.42  | 34 |
| 1621.844  | 2 | 1621.8439 | 0.0001  | 263 | 276 | 0 | 89.78  | 37 |
| 1678.789  | 2 | 1678.7906 | -0.0016 | 63  | 77  | 0 | 72.6   | 37 |
| 1695.826  | 2 | 1695.8257 | 0.0004  | 337 | 350 | 0 | 80.01  | 37 |
| 1813.8994 | 2 | 1813.8999 | -0.0005 | 47  | 62  | 1 | 81.3   | 37 |
| 1821.9157 | 2 | 1821.9156 | 0.0001  | 3   | 19  | 0 | 110.72 | 38 |
| 1950.8802 | 2 | 1950.8815 | -0.0013 | 363 | 379 | 0 | 119.49 | 35 |
| 1971.9883 | 2 | 1971.9902 | -0.0019 | 104 | 121 | 0 | 161.16 | 37 |
| 2100.0824 | 2 | 2100.0851 | -0.0027 | 104 | 122 | 1 | 136.44 | 37 |
| 2110.0562 | 3 | 2109.0571 | 0.9991  | 1   | 19  | 1 | 59.63  | 37 |
| 2366.118  | 2 | 2366.1212 | -0.0032 | 277 | 297 | 0 | 67.55  | 36 |
| 2763.3128 | 3 | 2763.3143 | -0.0014 | 217 | 241 | 0 | 106.25 | 37 |
| 2797.3283 | 3 | 2797.3361 | -0.0078 | 78  | 103 | 1 | 77.35  | 36 |
| 3200.4665 | 4 | 3199.4669 | 0.9995  | 20  | 46  | 0 | 39.48  | 35 |
| 3325.498  | 3 | 3325.5014 | -0.0034 | 123 | 154 | 0 | 55.03  | 34 |
| 4573.1092 | 3 | 4572.1135 | 0.9957  | 175 | 213 | 0 | 37.76  | 33 |
| 1026.5479 | 2 | 1026.5498 | -0.0019 | 310 | 318 | 0 | 71.82  | 34 |
| 1064.4188 | 2 | 1064.4201 | -0.0013 | 298 | 306 | 0 | 33.07  | 26 |
| 1138.6858 | 2 | 1138.6862 | -0.0004 | 253 | 262 | 0 | 73.82  | 28 |
| 1145.5818 | 2 | 1145.5829 | -0.0011 | 242 | 251 | 0 | 44.4   | 38 |
| 1230.5696 | 2 | 1230.5703 | -0.0007 | 381 | 390 | 0 | 71.7   | 35 |
| 1273.6776 | 2 | 1273.6779 | -0.0003 | 242 | 252 | 1 | 44.7   | 38 |
| 1297.6297 | 2 | 1297.6302 | -0.0006 | 47  | 58  | 0 | 54.04  | 36 |
| 1370.6757 | 2 | 1370.6765 | -0.0008 | 380 | 390 | 1 | 52.99  | 36 |
| 1433.6391 | 2 | 1433.6393 | -0.0003 | 163 | 174 | 0 | 95.58  | 34 |
| 1621.844  | 2 | 1621.8439 | 0.0001  | 263 | 276 | 0 | 89.78  | 37 |
| 1678.789  | 2 | 1678.7906 | -0.0016 | 63  | 77  | 0 | 72.6   | 37 |
| 1695.826  | 2 | 1695.8257 | 0.0004  | 337 | 350 | 0 | 80.01  | 37 |
| 1821.9157 | 2 | 1821.9156 | 0.0001  | 3   | 19  | 0 | 110.72 | 38 |
| 1950.8802 | 2 | 1950.8815 | -0.0013 | 363 | 379 | 0 | 119.49 | 35 |
| 1971.9883 | 2 | 1971.9902 | -0.0019 | 104 | 121 | 0 | 161.16 | 37 |
| 2100.0824 | 2 | 2100.0851 | -0.0027 | 104 | 122 | 1 | 136.44 | 37 |
| 2110.0562 | 3 | 2109.0571 | 0.9991  | 1   | 19  | 1 | 59.63  | 37 |
| 2366.118  | 2 | 2366.1212 | -0.0032 | 277 | 297 | 0 | 67.55  | 36 |
| 2763.3128 | 3 | 2763.3143 | -0.0014 | 217 | 241 | 0 | 106.25 | 37 |
| 2797.3283 | 3 | 2797.3361 | -0.0078 | 78  | 103 | 1 | 77.35  | 36 |
| 3150.3817 | 3 | 3149.3819 | 0.9998  | 20  | 46  | 0 | 102.02 | 32 |
| 3398.4952 | 3 | 3398.5    | -0.0048 | 123 | 154 | 0 | 71.48  | 31 |
| 4573.1092 | 3 | 4572.1135 | 0.9957  | 175 | 213 | 0 | 37.76  | 33 |
| 1064.4188 | 2 | 1064.4201 | -0.0013 | 298 | 306 | 0 | 33.07  | 26 |
| 1138.6858 | 2 | 1138.6862 | -0.0004 | 253 | 262 | 0 | 73.82  | 28 |
| 1145.5818 | 2 | 1145.5829 | -0.0011 | 242 | 251 | 0 | 44.4   | 38 |
| 1230.5696 | 2 | 1230.5703 | -0.0007 | 381 | 390 | 0 | 71.7   | 35 |
| 1273.6776 | 2 | 1273.6779 | -0.0003 | 242 | 252 | 1 | 44.7   | 38 |
| 1286.6536 | 2 | 1286.6541 | -0.0005 | 351 | 362 | 0 | 43.73  | 37 |
| 1295.6005 | 2 | 1295.5994 | 0.0012  | 36  | 46  | 0 | 80.86  | 36 |
| 1370.6757 | 2 | 1370.6765 | -0.0008 | 380 | 390 | 1 | 52.99  | 36 |
| 1383.6944 | 2 | 1383.6931 | 0.0014  | 163 | 174 | 0 | 81.19  | 37 |
| 1444.6407 | 2 | 1444.6405 | 0.0002  | 47  | 58  | 0 | 102.65 | 33 |
| 1445.6811 | 2 | 1445.682  | -0.001  | 325 | 336 | 0 | 82.73  | 36 |
| 1621.844  | 2 | 1621.8439 | 0.0001  | 263 | 276 | 0 | 89.78  | 37 |
| 1678.789  | 2 | 1678.7906 | -0.0016 | 63  | 77  | 0 | 72.6   | 37 |
| 1695.826  | 2 | 1695.8257 | 0.0004  | 337 | 350 | 0 | 80.01  | 37 |
| 1777.856  | 2 | 1777.8557 | 0.0003  | 283 | 297 | 0 | 82.48  | 38 |
| 1821.9157 | 2 | 1821.9156 | 0.0001  | 3   | 19  | 0 | 110.72 | 38 |
| 1871.8616 | 2 | 1871.8625 | -0.0009 | 20  | 35  | 0 | 86.04  | 36 |

|           |   |           |         |     |     |   |        |    |
|-----------|---|-----------|---------|-----|-----|---|--------|----|
| 1950.8802 | 2 | 1950.8815 | -0.0013 | 363 | 379 | 0 | 119.49 | 35 |
| 1971.9883 | 2 | 1971.9902 | -0.0019 | 104 | 121 | 0 | 161.16 | 37 |
| 2100.0824 | 2 | 2100.0851 | -0.0027 | 104 | 122 | 1 | 136.44 | 37 |
| 2110.0562 | 3 | 2109.0571 | 0.9991  | 1   | 19  | 1 | 59.63  | 37 |
| 2750.3174 | 3 | 2750.319  | -0.0017 | 217 | 241 | 0 | 59.81  | 37 |
| 2801.2925 | 3 | 2801.2946 | -0.0022 | 78  | 103 | 1 | 95.57  | 35 |
| 3398.4952 | 3 | 3398.5    | -0.0048 | 123 | 154 | 0 | 71.48  | 31 |
| 4573.1092 | 3 | 4572.1135 | 0.9957  | 175 | 213 | 0 | 37.76  | 33 |
| 1064.4188 | 2 | 1064.4201 | -0.0013 | 298 | 306 | 0 | 33.07  | 26 |
| 1138.6858 | 2 | 1138.6862 | -0.0004 | 253 | 262 | 0 | 73.82  | 28 |
| 1145.5818 | 2 | 1145.5829 | -0.0011 | 242 | 251 | 0 | 44.4   | 38 |
| 1230.5696 | 2 | 1230.5703 | -0.0007 | 381 | 390 | 0 | 71.7   | 35 |
| 1273.6776 | 2 | 1273.6779 | -0.0003 | 242 | 252 | 1 | 44.7   | 38 |
| 1286.6536 | 2 | 1286.6541 | -0.0005 | 351 | 362 | 0 | 43.73  | 37 |
| 1307.6351 | 2 | 1307.6357 | -0.0006 | 36  | 46  | 0 | 74.91  | 38 |
| 1370.6757 | 2 | 1370.6765 | -0.0008 | 380 | 390 | 1 | 52.99  | 36 |
| 1430.6242 | 2 | 1430.6248 | -0.0006 | 47  | 58  | 0 | 88.53  | 32 |
| 1433.6391 | 2 | 1433.6393 | -0.0003 | 163 | 174 | 0 | 95.58  | 34 |
| 1445.6811 | 2 | 1445.682  | -0.001  | 325 | 336 | 0 | 82.73  | 36 |
| 1621.844  | 2 | 1621.8439 | 0.0001  | 263 | 276 | 0 | 89.78  | 37 |
| 1632.7854 | 2 | 1632.7851 | 0.0003  | 63  | 77  | 0 | 66.07  | 37 |
| 1695.826  | 2 | 1695.8257 | 0.0004  | 337 | 350 | 0 | 80.01  | 37 |
| 1772.8785 | 2 | 1772.8767 | 0.0018  | 283 | 297 | 0 | 38.68  | 38 |
| 1898.9269 | 2 | 1898.9275 | -0.0006 | 20  | 35  | 0 | 111.98 | 37 |
| 1950.8802 | 2 | 1950.8815 | -0.0013 | 363 | 379 | 0 | 119.49 | 35 |
| 1971.9883 | 2 | 1971.9902 | -0.0019 | 104 | 121 | 0 | 161.16 | 37 |
| 2100.0824 | 2 | 2100.0851 | -0.0027 | 104 | 122 | 1 | 136.44 | 37 |
| 2736.303  | 3 | 2736.3034 | -0.0004 | 217 | 241 | 0 | 63.4   | 37 |
| 2813.3283 | 3 | 2813.331  | -0.0027 | 78  | 103 | 1 | 97.05  | 36 |
| 3398.4952 | 3 | 3398.5    | -0.0048 | 123 | 154 | 0 | 71.48  | 31 |
| 4573.1092 | 3 | 4572.1135 | 0.9957  | 175 | 213 | 0 | 37.76  | 33 |
| 1064.4188 | 2 | 1064.4201 | -0.0013 | 298 | 306 | 0 | 33.07  | 26 |
| 1138.6858 | 2 | 1138.6862 | -0.0004 | 253 | 262 | 0 | 73.82  | 28 |
| 1145.5818 | 2 | 1145.5829 | -0.0011 | 242 | 251 | 0 | 44.4   | 38 |
| 1230.5696 | 2 | 1230.5703 | -0.0007 | 381 | 390 | 0 | 71.7   | 35 |
| 1273.6776 | 2 | 1273.6779 | -0.0003 | 242 | 252 | 1 | 44.7   | 38 |
| 1286.6536 | 2 | 1286.6541 | -0.0005 | 351 | 362 | 0 | 43.73  | 37 |
| 1363.6365 | 2 | 1363.6368 | -0.0002 | 36  | 46  | 0 | 57.24  | 37 |
| 1370.6757 | 2 | 1370.6765 | -0.0008 | 380 | 390 | 1 | 52.99  | 36 |
| 1383.6944 | 2 | 1383.6931 | 0.0014  | 163 | 174 | 0 | 81.19  | 37 |
| 1430.6242 | 2 | 1430.6248 | -0.0006 | 47  | 58  | 0 | 88.53  | 32 |
| 1445.6811 | 2 | 1445.682  | -0.001  | 325 | 336 | 0 | 82.73  | 36 |
| 1621.844  | 2 | 1621.8439 | 0.0001  | 263 | 276 | 0 | 89.78  | 37 |
| 1632.7854 | 2 | 1632.7851 | 0.0003  | 63  | 77  | 0 | 66.07  | 37 |
| 1695.826  | 2 | 1695.8257 | 0.0004  | 337 | 350 | 0 | 80.01  | 37 |
| 1821.9157 | 2 | 1821.9156 | 0.0001  | 3   | 19  | 0 | 110.72 | 38 |
| 1950.8802 | 2 | 1950.8815 | -0.0013 | 363 | 379 | 0 | 119.49 | 35 |
| 1971.9883 | 2 | 1971.9902 | -0.0019 | 104 | 121 | 0 | 161.16 | 37 |
| 2100.0824 | 2 | 2100.0851 | -0.0027 | 104 | 122 | 1 | 136.44 | 37 |
| 2110.0562 | 3 | 2109.0571 | 0.9991  | 1   | 19  | 1 | 59.63  | 37 |
| 2750.3174 | 3 | 2750.319  | -0.0017 | 217 | 241 | 0 | 59.81  | 37 |
| 2813.3283 | 3 | 2813.331  | -0.0027 | 78  | 103 | 1 | 97.05  | 36 |
| 3398.4952 | 3 | 3398.5    | -0.0048 | 123 | 154 | 0 | 71.48  | 31 |
| 4573.1092 | 3 | 4572.1135 | 0.9957  | 175 | 213 | 0 | 37.76  | 33 |
| 908.4956  | 2 | 908.4967  | -0.0011 | 157 | 164 | 1 | 46.2   | 33 |
| 986.5397  | 2 | 986.5397  | 0.0001  | 327 | 336 | 0 | 44.67  | 37 |
| 1282.4962 | 2 | 1282.4967 | -0.0005 | 312 | 320 | 0 | 53.32  | 24 |
| 1379.6899 | 3 | 1379.6907 | -0.0008 | 391 | 401 | 1 | 41.64  | 38 |

|           |   |           |         |     |     |   |        |    |
|-----------|---|-----------|---------|-----|-----|---|--------|----|
| 1472.8563 | 2 | 1472.8562 | 0       | 230 | 243 | 0 | 98.59  | 30 |
| 1597.7599 | 2 | 1597.7599 | -0.0001 | 340 | 352 | 0 | 80.05  | 37 |
| 1689.8787 | 2 | 1689.8798 | -0.0011 | 216 | 229 | 1 | 47.46  | 37 |
| 1714.9134 | 2 | 1714.9142 | -0.0008 | 65  | 79  | 0 | 90.85  | 36 |
| 1791.9213 | 2 | 1791.9229 | -0.0016 | 265 | 280 | 0 | 102.14 | 38 |
| 1856.8744 | 2 | 1856.8761 | -0.0016 | 374 | 390 | 0 | 121.23 | 37 |
| 1884.9388 | 2 | 1884.9404 | -0.0016 | 353 | 370 | 0 | 65.51  | 37 |
| 1887.95   | 3 | 1887.9513 | -0.0013 | 106 | 121 | 1 | 56.5   | 37 |
| 1976.8742 | 2 | 1976.8752 | -0.001  | 41  | 60  | 0 | 117.83 | 33 |
| 2279.1778 | 3 | 2279.1798 | -0.0019 | 65  | 84  | 1 | 36.93  | 36 |
| 2345.004  | 3 | 2345.0059 | -0.0019 | 403 | 422 | 0 | 55.38  | 32 |
| 2384.1854 | 2 | 2384.1873 | -0.0018 | 85  | 105 | 1 | 96.16  | 37 |
| 2394.1838 | 2 | 2394.1856 | -0.0017 | 244 | 264 | 0 | 125.3  | 38 |
| 2501.1031 | 3 | 2501.107  | -0.0039 | 402 | 422 | 1 | 114.63 | 33 |
| 2640.2217 | 3 | 2640.22   | 0.0018  | 281 | 304 | 0 | 72.04  | 36 |
| 3192.6214 | 3 | 3192.6238 | -0.0024 | 125 | 156 | 0 | 98.9   | 35 |
| 3320.7196 | 3 | 3320.7187 | 0.0008  | 124 | 156 | 1 | 120.75 | 34 |
| 908.4956  | 2 | 908.4967  | -0.0011 | 157 | 164 | 1 | 46.2   | 33 |
| 986.5397  | 2 | 986.5397  | 0.0001  | 327 | 336 | 0 | 44.67  | 37 |
| 1282.4962 | 2 | 1282.4967 | -0.0005 | 312 | 320 | 0 | 53.32  | 24 |
| 1379.6899 | 3 | 1379.6907 | -0.0008 | 391 | 401 | 1 | 41.64  | 38 |
| 1472.8563 | 2 | 1472.8562 | 0       | 230 | 243 | 0 | 98.59  | 30 |
| 1597.7599 | 2 | 1597.7599 | -0.0001 | 340 | 352 | 0 | 80.05  | 37 |
| 1662.866  | 2 | 1662.8689 | -0.0029 | 216 | 229 | 1 | 40.28  | 37 |
| 1714.9134 | 2 | 1714.9142 | -0.0008 | 65  | 79  | 0 | 90.85  | 36 |
| 1791.9213 | 2 | 1791.9229 | -0.0016 | 265 | 280 | 0 | 102.14 | 38 |
| 1856.8744 | 2 | 1856.8761 | -0.0016 | 374 | 390 | 0 | 121.23 | 37 |
| 1884.9388 | 2 | 1884.9404 | -0.0016 | 353 | 370 | 0 | 65.51  | 37 |
| 1887.95   | 3 | 1887.9513 | -0.0013 | 106 | 121 | 1 | 56.5   | 37 |
| 1976.8742 | 2 | 1976.8752 | -0.001  | 41  | 60  | 0 | 117.83 | 33 |
| 2279.1778 | 3 | 2279.1798 | -0.0019 | 65  | 84  | 1 | 36.93  | 36 |
| 2345.004  | 3 | 2345.0059 | -0.0019 | 403 | 422 | 0 | 55.38  | 32 |
| 2384.1854 | 2 | 2384.1873 | -0.0018 | 85  | 105 | 1 | 96.16  | 37 |
| 2394.1838 | 2 | 2394.1856 | -0.0017 | 244 | 264 | 0 | 125.3  | 38 |
| 2501.1031 | 3 | 2501.107  | -0.0039 | 402 | 422 | 1 | 114.63 | 33 |
| 2640.2217 | 3 | 2640.22   | 0.0018  | 281 | 304 | 0 | 72.04  | 36 |
| 3192.6214 | 3 | 3192.6238 | -0.0024 | 125 | 156 | 0 | 98.9   | 35 |
| 3320.7196 | 3 | 3320.7187 | 0.0008  | 124 | 156 | 1 | 120.75 | 34 |
| 893.4678  | 2 | 893.4681  | -0.0003 | 389 | 395 | 0 | 40.8   | 37 |
| 957.5133  | 2 | 957.5131  | 0.0002  | 118 | 125 | 0 | 48.42  | 36 |
| 1113.6758 | 2 | 1113.6758 | 0       | 331 | 340 | 0 | 73.29  | 31 |
| 1141.5652 | 2 | 1141.5663 | -0.001  | 138 | 148 | 0 | 58.79  | 35 |
| 1335.6043 | 2 | 1335.6055 | -0.0012 | 2   | 14  | 0 | 42.03  | 35 |
| 1400.7251 | 2 | 1400.726  | -0.0009 | 76  | 89  | 0 | 101.75 | 37 |
| 1446.7438 | 2 | 1446.7467 | -0.0029 | 376 | 388 | 0 | 101.46 | 38 |
| 1501.8713 | 2 | 1501.8729 | -0.0016 | 153 | 167 | 0 | 92.86  | 30 |
| 1574.8418 | 2 | 1574.8417 | 0.0001  | 375 | 388 | 1 | 110.34 | 37 |
| 1586.6945 | 2 | 1586.6956 | -0.0011 | 184 | 196 | 0 | 105.88 | 33 |
| 1826.9299 | 2 | 1826.9315 | -0.0016 | 53  | 68  | 1 | 101.14 | 37 |
| 1919.9974 | 2 | 1919.988  | 0.0094  | 396 | 412 | 0 | 68.6   | 37 |
| 2026.8867 | 3 | 2026.8875 | -0.0008 | 300 | 317 | 1 | 100.1  | 33 |
| 2074.0756 | 2 | 2074.0769 | -0.0012 | 213 | 231 | 0 | 108.68 | 37 |
| 2698.389  | 2 | 2698.3888 | 0.0003  | 266 | 288 | 0 | 86.29  | 35 |
| 2894.4912 | 3 | 2894.4927 | -0.0014 | 341 | 365 | 0 | 127.63 | 35 |
| 3136.6036 | 2 | 3136.6049 | -0.0013 | 90  | 117 | 0 | 36.72  | 35 |
| 893.4678  | 2 | 893.4681  | -0.0003 | 389 | 395 | 0 | 40.8   | 37 |
| 934.5118  | 2 | 934.5124  | -0.0006 | 129 | 137 | 0 | 43.34  | 35 |
| 957.5133  | 2 | 957.5131  | 0.0002  | 118 | 125 | 0 | 48.42  | 36 |

|           |   |           |         |     |     |   |        |    |
|-----------|---|-----------|---------|-----|-----|---|--------|----|
| 975.5502  | 2 | 975.5502  | 0       | 376 | 384 | 0 | 69.86  | 36 |
| 1103.6446 | 2 | 1103.6451 | -0.0006 | 375 | 384 | 1 | 50.61  | 33 |
| 1113.6758 | 2 | 1113.6758 | 0       | 331 | 340 | 0 | 73.29  | 31 |
| 1141.5652 | 2 | 1141.5663 | -0.001  | 138 | 148 | 0 | 58.79  | 35 |
| 1400.7251 | 2 | 1400.726  | -0.0009 | 76  | 89  | 0 | 101.75 | 37 |
| 1501.8713 | 2 | 1501.8729 | -0.0016 | 153 | 167 | 0 | 92.86  | 30 |
| 1586.6945 | 2 | 1586.6956 | -0.0011 | 184 | 196 | 0 | 105.88 | 33 |
| 1826.9299 | 2 | 1826.9315 | -0.0016 | 53  | 68  | 1 | 101.14 | 37 |
| 1919.9974 | 2 | 1919.988  | 0.0094  | 396 | 412 | 0 | 68.6   | 37 |
| 2026.8867 | 3 | 2026.8875 | -0.0008 | 300 | 317 | 1 | 100.1  | 33 |
| 2074.0756 | 2 | 2074.0769 | -0.0012 | 213 | 231 | 0 | 108.68 | 37 |
| 2698.389  | 2 | 2698.3888 | 0.0003  | 266 | 288 | 0 | 86.29  | 35 |
| 2894.4912 | 3 | 2894.4927 | -0.0014 | 341 | 365 | 0 | 127.63 | 35 |
| 3875.7475 | 3 | 3875.7472 | 0.0002  | 20  | 52  | 0 | 79.67  | 33 |
| 908.4956  | 2 | 908.4967  | -0.0011 | 157 | 164 | 1 | 46.2   | 33 |
| 986.5397  | 2 | 986.5397  | 0.0001  | 327 | 336 | 0 | 44.67  | 37 |
| 1282.4962 | 2 | 1282.4967 | -0.0005 | 312 | 320 | 0 | 53.32  | 24 |
| 1379.6899 | 3 | 1379.6907 | -0.0008 | 391 | 401 | 1 | 41.64  | 38 |
| 1530.8982 | 2 | 1530.8981 | 0.0001  | 230 | 243 | 0 | 116.73 | 28 |
| 1583.7439 | 2 | 1583.7443 | -0.0004 | 340 | 352 | 0 | 79.54  | 36 |
| 1690.8624 | 2 | 1690.8638 | -0.0014 | 216 | 229 | 1 | 56.66  | 38 |
| 1714.9134 | 2 | 1714.9142 | -0.0008 | 65  | 79  | 0 | 90.85  | 36 |
| 1733.9168 | 2 | 1733.9174 | -0.0007 | 265 | 280 | 0 | 79.69  | 37 |
| 1867.889  | 2 | 1867.892  | -0.003  | 374 | 390 | 0 | 117.78 | 37 |
| 1884.9388 | 2 | 1884.9404 | -0.0016 | 353 | 370 | 0 | 65.51  | 37 |
| 2279.1778 | 3 | 2279.1798 | -0.0019 | 65  | 84  | 1 | 36.93  | 36 |
| 2345.004  | 3 | 2345.0059 | -0.0019 | 403 | 422 | 0 | 55.38  | 32 |
| 2384.1854 | 2 | 2384.1873 | -0.0018 | 85  | 105 | 1 | 96.16  | 37 |
| 2501.1031 | 3 | 2501.107  | -0.0039 | 402 | 422 | 1 | 114.63 | 33 |
| 2694.2665 | 3 | 2694.2669 | -0.0004 | 281 | 304 | 0 | 43.44  | 36 |
| 3192.6214 | 3 | 3192.6238 | -0.0024 | 125 | 156 | 0 | 98.9   | 35 |
| 3320.7196 | 3 | 3320.7187 | 0.0008  | 124 | 156 | 1 | 120.75 | 34 |
| 1094.6379 | 2 | 1094.6376 | 0.0003  | 382 | 390 | 0 | 42.26  | 31 |
| 1128.6384 | 2 | 1128.6391 | -0.0006 | 465 | 476 | 0 | 62.31  | 35 |
| 1156.6417 | 2 | 1156.6452 | -0.0035 | 316 | 326 | 0 | 98.31  | 36 |
| 1388.6628 | 2 | 1388.6646 | -0.0018 | 330 | 341 | 0 | 70.23  | 36 |
| 1434.6616 | 2 | 1434.6626 | -0.001  | 113 | 124 | 1 | 79.8   | 36 |
| 1680.9381 | 2 | 1680.941  | -0.0029 | 342 | 357 | 0 | 105.45 | 32 |
| 1767.7778 | 3 | 1767.7787 | -0.001  | 143 | 157 | 0 | 59.85  | 33 |
| 1809.8719 | 2 | 1809.8745 | -0.0025 | 127 | 142 | 0 | 114.61 | 37 |
| 1811.9643 | 2 | 1811.9638 | 0.0005  | 441 | 456 | 0 | 74.93  | 36 |
| 1922.0396 | 2 | 1922.0394 | 0.0002  | 93  | 112 | 0 | 130.56 | 34 |
| 2113.0424 | 2 | 2113.0426 | -0.0002 | 205 | 222 | 0 | 134.71 | 37 |
| 2148.146  | 2 | 2148.1467 | -0.0006 | 283 | 301 | 0 | 106.09 | 35 |
| 3051.5959 | 3 | 3051.5951 | 0.0008  | 330 | 357 | 1 | 67.19  | 34 |
| 3434.7324 | 2 | 3434.7344 | -0.002  | 223 | 254 | 0 | 69.57  | 35 |
| 797.5124  | 2 | 797.5123  | 0.0001  | 307 | 313 | 0 | 52.18  | 26 |
| 971.5401  | 2 | 971.54    | 0.0001  | 566 | 574 | 0 | 54.76  | 36 |
| 1037.5214 | 2 | 1037.5216 | -0.0002 | 829 | 836 | 0 | 49.18  | 37 |
| 1049.525  | 2 | 1049.5254 | -0.0004 | 521 | 529 | 0 | 58.81  | 37 |
| 1115.5835 | 2 | 1115.5822 | 0.0013  | 862 | 870 | 0 | 44.47  | 37 |
| 1157.6287 | 2 | 1157.6292 | -0.0005 | 200 | 209 | 0 | 66.17  | 37 |
| 1158.5866 | 2 | 1158.588  | -0.0014 | 506 | 516 | 0 | 80.95  | 37 |
| 1172.4843 | 2 | 1172.4842 | 0.0001  | 693 | 701 | 0 | 55.48  | 29 |
| 1206.6353 | 3 | 1206.6357 | -0.0004 | 438 | 447 | 1 | 52.04  | 37 |
| 1263.528  | 2 | 1263.5302 | -0.0022 | 548 | 558 | 0 | 48.92  | 30 |
| 1313.7289 | 2 | 1313.7303 | -0.0014 | 199 | 209 | 1 | 36.93  | 36 |
| 1318.7109 | 3 | 1318.7105 | 0.0003  | 519 | 529 | 1 | 37.85  | 37 |

|           |   |           |         |     |     |   |        |    |
|-----------|---|-----------|---------|-----|-----|---|--------|----|
| 1381.7552 | 2 | 1381.7565 | -0.0013 | 288 | 300 | 1 | 74.08  | 34 |
| 1396.73   | 2 | 1396.731  | -0.001  | 236 | 248 | 0 | 58.23  | 36 |
| 1410.6414 | 2 | 1410.6416 | -0.0002 | 875 | 887 | 0 | 59.04  | 35 |
| 1475.7759 | 2 | 1475.7773 | -0.0014 | 183 | 196 | 0 | 72.21  | 38 |
| 1495.7225 | 2 | 1495.7228 | -0.0003 | 275 | 287 | 0 | 74.41  | 37 |
| 1690.8029 | 2 | 1690.8024 | 0.0005  | 678 | 692 | 0 | 71.91  | 37 |
| 1891.0402 | 2 | 1891.0415 | -0.0012 | 454 | 470 | 0 | 109.53 | 33 |
| 1984.9494 | 3 | 1984.9499 | -0.0005 | 743 | 759 | 0 | 42.36  | 37 |
| 2032.1222 | 2 | 2032.1218 | 0.0005  | 210 | 227 | 0 | 79.09  | 32 |
| 2250.0899 | 3 | 2250.0916 | -0.0017 | 481 | 500 | 0 | 71.72  | 37 |
| 2263.1432 | 2 | 2263.1485 | -0.0052 | 707 | 728 | 0 | 115    | 37 |
| 2396.273  | 3 | 2395.2669 | 1.0062  | 767 | 788 | 1 | 59.51  | 34 |
| 2490.3829 | 3 | 2490.3846 | -0.0017 | 449 | 470 | 1 | 31.62  | 29 |
| 2507.3745 | 3 | 2507.3748 | -0.0003 | 136 | 160 | 0 | 94.13  | 31 |
| 2663.4742 | 4 | 2663.4759 | -0.0017 | 135 | 160 | 1 | 51.42  | 29 |
| 3307.5964 | 3 | 3306.5892 | 1.0072  | 581 | 611 | 0 | 58.96  | 36 |
| 3816.0484 | 3 | 3815.0468 | 1.0015  | 385 | 421 | 1 | 34.68  | 29 |
| 1003.4755 | 2 | 1003.4757 | -0.0002 | 351 | 359 | 0 | 50.79  | 36 |
| 1064.4188 | 2 | 1064.4201 | -0.0013 | 298 | 306 | 0 | 33.07  | 26 |
| 1138.6858 | 2 | 1138.6862 | -0.0004 | 253 | 262 | 0 | 73.82  | 28 |
| 1145.5818 | 2 | 1145.5829 | -0.0011 | 242 | 251 | 0 | 44.4   | 38 |
| 1230.5696 | 2 | 1230.5703 | -0.0007 | 381 | 390 | 0 | 71.7   | 35 |
| 1273.6776 | 2 | 1273.6779 | -0.0003 | 242 | 252 | 1 | 44.7   | 38 |
| 1292.6363 | 2 | 1292.6361 | 0.0003  | 36  | 46  | 0 | 71.09  | 38 |
| 1370.6757 | 2 | 1370.6765 | -0.0008 | 380 | 390 | 1 | 52.99  | 36 |
| 1383.6944 | 2 | 1383.6931 | 0.0014  | 163 | 174 | 0 | 81.19  | 37 |
| 1430.6242 | 2 | 1430.6248 | -0.0006 | 47  | 58  | 0 | 88.53  | 32 |
| 1445.6811 | 2 | 1445.682  | -0.001  | 325 | 336 | 0 | 82.73  | 36 |
| 1621.844  | 2 | 1621.8439 | 0.0001  | 263 | 276 | 0 | 89.78  | 37 |
| 1695.826  | 2 | 1695.8257 | 0.0004  | 337 | 350 | 0 | 80.01  | 37 |
| 1955.9959 | 2 | 1955.9953 | 0.0006  | 104 | 121 | 0 | 127.56 | 37 |
| 2084.0898 | 3 | 2084.0902 | -0.0005 | 104 | 122 | 1 | 75.31  | 36 |
| 2750.3174 | 3 | 2750.319  | -0.0017 | 217 | 241 | 0 | 59.81  | 37 |
| 2827.3415 | 3 | 2827.3467 | -0.0052 | 78  | 103 | 1 | 75.16  | 36 |
| 3398.4952 | 3 | 3398.5    | -0.0048 | 123 | 154 | 0 | 71.48  | 31 |
| 4573.1092 | 3 | 4572.1135 | 0.9957  | 175 | 213 | 0 | 37.76  | 33 |
| 1214.6444 | 2 | 1214.6441 | 0.0003  | 164 | 175 | 0 | 74.12  | 37 |
| 1227.6195 | 2 | 1227.6207 | -0.0013 | 29  | 39  | 0 | 56.17  | 36 |
| 1229.5223 | 2 | 1229.5234 | -0.0011 | 81  | 91  | 0 | 72.83  | 30 |
| 1277.6219 | 2 | 1277.6227 | -0.0008 | 243 | 252 | 0 | 50.39  | 38 |
| 1312.6121 | 2 | 1312.6122 | 0       | 308 | 317 | 0 | 42.09  | 36 |
| 1357.6077 | 2 | 1357.6084 | -0.0007 | 546 | 556 | 0 | 64.67  | 34 |
| 1385.7248 | 2 | 1385.7224 | 0.0024  | 604 | 615 | 0 | 46.93  | 37 |
| 1425.7566 | 2 | 1425.7576 | -0.001  | 335 | 348 | 0 | 58.84  | 36 |
| 1472.6778 | 2 | 1472.6783 | -0.0006 | 40  | 52  | 0 | 80.67  | 35 |
| 1539.7495 | 2 | 1539.7504 | -0.0009 | 306 | 317 | 1 | 58.41  | 37 |
| 1658.8871 | 2 | 1658.8879 | -0.0008 | 176 | 191 | 0 | 88.34  | 37 |
| 1662.8008 | 2 | 1662.8036 | -0.0027 | 60  | 74  | 0 | 82.47  | 38 |
| 1674.7213 | 2 | 1674.7234 | -0.0021 | 227 | 242 | 0 | 93.85  | 32 |
| 1679.826  | 2 | 1679.8267 | -0.0007 | 145 | 159 | 0 | 48.97  | 38 |
| 1786.9819 | 2 | 1786.9828 | -0.001  | 176 | 192 | 1 | 54.57  | 34 |
| 1965.9973 | 2 | 1965.9982 | -0.0009 | 352 | 367 | 1 | 83.92  | 37 |
| 2559.2462 | 2 | 2559.2452 | 0.001   | 368 | 393 | 0 | 137.6  | 37 |
| 2657.2592 | 2 | 2657.2609 | -0.0017 | 431 | 453 | 0 | 102.91 | 36 |
| 3025.4881 | 3 | 3024.4815 | 1.0065  | 279 | 305 | 0 | 43.83  | 36 |
| 3034.6993 | 3 | 3034.6988 | 0.0004  | 394 | 422 | 0 | 47.8   | 26 |
| 1064.4188 | 2 | 1064.4201 | -0.0013 | 299 | 307 | 0 | 33.07  | 26 |
| 1138.6858 | 2 | 1138.6862 | -0.0004 | 254 | 263 | 0 | 73.82  | 28 |

|           |   |           |         |      |      |   |        |    |
|-----------|---|-----------|---------|------|------|---|--------|----|
| 1145.5818 | 2 | 1145.5829 | -0.0011 | 243  | 252  | 0 | 44.4   | 38 |
| 1230.5696 | 2 | 1230.5703 | -0.0007 | 382  | 391  | 0 | 71.7   | 35 |
| 1273.6776 | 2 | 1273.6779 | -0.0003 | 243  | 253  | 1 | 44.7   | 38 |
| 1370.6757 | 2 | 1370.6765 | -0.0008 | 381  | 391  | 1 | 52.99  | 36 |
| 1379.6334 | 2 | 1379.6317 | 0.0017  | 36   | 47   | 0 | 84.46  | 36 |
| 1383.6944 | 2 | 1383.6931 | 0.0014  | 164  | 175  | 0 | 81.19  | 37 |
| 1621.844  | 2 | 1621.8439 | 0.0001  | 264  | 277  | 0 | 89.78  | 37 |
| 1678.789  | 2 | 1678.7906 | -0.0016 | 64   | 78   | 0 | 72.6   | 37 |
| 1695.826  | 2 | 1695.8257 | 0.0004  | 338  | 351  | 0 | 80.01  | 37 |
| 1955.9959 | 2 | 1955.9953 | 0.0006  | 105  | 122  | 0 | 127.56 | 37 |
| 2084.0898 | 3 | 2084.0902 | -0.0005 | 105  | 123  | 1 | 75.31  | 36 |
| 2813.3283 | 3 | 2813.331  | -0.0027 | 79   | 104  | 1 | 97.05  | 36 |
| 3398.4952 | 3 | 3398.5    | -0.0048 | 124  | 155  | 0 | 71.48  | 31 |
| 4573.1092 | 3 | 4572.1135 | 0.9957  | 176  | 214  | 0 | 37.76  | 33 |
| 1214.6444 | 2 | 1214.6441 | 0.0003  | 164  | 175  | 0 | 74.12  | 37 |
| 1227.6195 | 2 | 1227.6207 | -0.0013 | 29   | 39   | 0 | 56.17  | 36 |
| 1277.6219 | 2 | 1277.6227 | -0.0008 | 243  | 252  | 0 | 50.39  | 38 |
| 1307.6968 | 2 | 1307.6972 | -0.0005 | 133  | 144  | 0 | 61.71  | 36 |
| 1357.6077 | 2 | 1357.6084 | -0.0007 | 546  | 556  | 0 | 64.67  | 34 |
| 1385.7248 | 2 | 1385.7224 | 0.0024  | 604  | 615  | 0 | 46.93  | 37 |
| 1406.755  | 2 | 1406.7558 | -0.0008 | 352  | 363  | 0 | 87.45  | 35 |
| 1430.7361 | 2 | 1430.7365 | -0.0004 | 335  | 348  | 0 | 86.58  | 37 |
| 1472.6778 | 2 | 1472.6783 | -0.0006 | 40   | 52   | 0 | 80.67  | 35 |
| 1521.7923 | 2 | 1521.7939 | -0.0017 | 306  | 317  | 1 | 53.08  | 37 |
| 1658.8871 | 2 | 1658.8879 | -0.0008 | 176  | 191  | 0 | 88.34  | 37 |
| 1674.7213 | 2 | 1674.7234 | -0.0021 | 227  | 242  | 0 | 93.85  | 32 |
| 1676.8178 | 2 | 1676.8192 | -0.0014 | 60   | 74   | 0 | 83.87  | 38 |
| 1679.826  | 2 | 1679.8267 | -0.0007 | 145  | 159  | 0 | 48.97  | 38 |
| 1786.9819 | 2 | 1786.9828 | -0.001  | 176  | 192  | 1 | 54.57  | 34 |
| 2111.091  | 3 | 2111.0939 | -0.0029 | 81   | 98   | 1 | 45.21  | 36 |
| 2573.259  | 2 | 2573.2609 | -0.0018 | 368  | 393  | 0 | 129.61 | 37 |
| 2657.2592 | 2 | 2657.2609 | -0.0017 | 431  | 453  | 0 | 102.91 | 36 |
| 847.4912  | 2 | 847.4916  | -0.0003 | 445  | 452  | 0 | 58.94  | 35 |
| 950.4812  | 2 | 950.4821  | -0.0009 | 974  | 982  | 0 | 44.99  | 38 |
| 971.5288  | 2 | 971.5287  | 0       | 41   | 48   | 0 | 50.89  | 35 |
| 987.5518  | 2 | 987.5535  | -0.0018 | 353  | 361  | 0 | 54.71  | 38 |
| 1151.5939 | 2 | 1151.5935 | 0.0004  | 1073 | 1082 | 0 | 46.09  | 37 |
| 1234.5977 | 2 | 1234.5976 | 0.0002  | 717  | 727  | 0 | 44.33  | 38 |
| 1268.7084 | 2 | 1268.7088 | -0.0004 | 512  | 524  | 0 | 58.51  | 34 |
| 1275.6419 | 2 | 1275.6427 | -0.0008 | 230  | 240  | 0 | 88.11  | 38 |
| 1405.8025 | 2 | 1405.8041 | -0.0016 | 832  | 844  | 0 | 58.52  | 31 |
| 1467.7757 | 2 | 1467.7755 | 0.0002  | 599  | 611  | 0 | 66.16  | 36 |
| 1482.754  | 2 | 1482.7541 | 0       | 389  | 400  | 0 | 102.59 | 37 |
| 1567.8223 | 2 | 1567.8246 | -0.0023 | 273  | 285  | 0 | 60.65  | 36 |
| 1930.0661 | 3 | 1930.0676 | -0.0015 | 1025 | 1042 | 1 | 37.31  | 33 |
| 1964.0145 | 2 | 1964.0136 | 0.0009  | 191  | 209  | 0 | 106.03 | 36 |
| 2099.0444 | 3 | 2098.0405 | 1.0039  | 384  | 400  | 1 | 63.98  | 37 |
| 2240.2258 | 2 | 2240.2264 | -0.0005 | 49   | 70   | 0 | 140.85 | 32 |
| 2500.3358 | 2 | 2500.336  | -0.0001 | 453  | 475  | 0 | 82.73  | 34 |
| 4585.2433 | 4 | 4585.2435 | -0.0002 | 246  | 285  | 1 | 37.42  | 33 |
| 783.4973  | 2 | 783.4967  | 0.0007  | 286  | 292  | 0 | 36.71  | 29 |
| 1037.5214 | 2 | 1037.5216 | -0.0002 | 808  | 815  | 0 | 49.18  | 37 |
| 1115.5835 | 2 | 1115.5822 | 0.0013  | 841  | 849  | 0 | 44.47  | 37 |
| 1157.6287 | 2 | 1157.6292 | -0.0005 | 180  | 189  | 0 | 66.17  | 37 |
| 1158.5866 | 2 | 1158.588  | -0.0014 | 485  | 495  | 0 | 80.95  | 37 |
| 1172.4843 | 2 | 1172.4842 | 0.0001  | 672  | 680  | 0 | 55.48  | 29 |
| 1206.6353 | 3 | 1206.6357 | -0.0004 | 417  | 426  | 1 | 52.04  | 37 |
| 1313.7289 | 2 | 1313.7303 | -0.0014 | 179  | 189  | 1 | 36.93  | 36 |

|           |   |           |         |     |     |   |        |    |
|-----------|---|-----------|---------|-----|-----|---|--------|----|
| 1381.7552 | 2 | 1381.7565 | -0.0013 | 267 | 279 | 1 | 74.08  | 34 |
| 1396.73   | 2 | 1396.731  | -0.001  | 216 | 228 | 0 | 58.23  | 36 |
| 1425.6517 | 2 | 1425.6525 | -0.0007 | 854 | 866 | 0 | 65.54  | 35 |
| 1475.7759 | 2 | 1475.7773 | -0.0014 | 163 | 176 | 0 | 72.21  | 38 |
| 1495.7225 | 2 | 1495.7228 | -0.0003 | 254 | 266 | 0 | 74.41  | 37 |
| 1690.8029 | 2 | 1690.8024 | 0.0005  | 657 | 671 | 0 | 71.91  | 37 |
| 1984.9494 | 3 | 1984.9499 | -0.0005 | 722 | 738 | 0 | 42.36  | 37 |
| 2032.1222 | 2 | 2032.1218 | 0.0005  | 190 | 207 | 0 | 79.09  | 32 |
| 2263.1432 | 2 | 2263.1485 | -0.0052 | 686 | 707 | 0 | 115    | 37 |
| 2396.273  | 3 | 2395.2669 | 1.0062  | 746 | 767 | 1 | 59.51  | 34 |
| 2507.3745 | 3 | 2507.3748 | -0.0003 | 116 | 140 | 0 | 94.13  | 31 |
| 2663.4742 | 4 | 2663.4759 | -0.0017 | 115 | 140 | 1 | 51.42  | 29 |
| 3816.0484 | 3 | 3815.0468 | 1.0015  | 364 | 400 | 1 | 34.68  | 29 |
| 1020.5281 | 2 | 1020.5274 | 0.0008  | 686 | 694 | 0 | 50.98  | 38 |
| 1155.5338 | 2 | 1155.5342 | -0.0004 | 224 | 233 | 0 | 48.58  | 35 |
| 1162.5974 | 2 | 1162.5982 | -0.0008 | 48  | 56  | 0 | 50.54  | 38 |
| 1166.5912 | 2 | 1166.5931 | -0.0019 | 57  | 66  | 0 | 45.13  | 37 |
| 1266.6014 | 2 | 1266.6026 | -0.0012 | 660 | 669 | 0 | 57.65  | 37 |
| 1335.6664 | 2 | 1335.667  | -0.0006 | 157 | 168 | 0 | 63.86  | 38 |
| 1402.8589 | 2 | 1402.8588 | 0.0001  | 562 | 574 | 0 | 90.82  | 20 |
| 1479.815  | 2 | 1479.8158 | -0.0008 | 828 | 842 | 1 | 78.81  | 34 |
| 1564.9018 | 2 | 1564.9011 | 0.0007  | 671 | 685 | 0 | 74.71  | 29 |
| 1998.0502 | 2 | 1998.0535 | -0.0032 | 843 | 861 | 0 | 128.11 | 36 |
| 2053.0388 | 2 | 2053.0401 | -0.0013 | 115 | 133 | 0 | 90.17  | 37 |
| 2111.0448 | 2 | 2111.0436 | 0.0012  | 368 | 387 | 0 | 102.6  | 37 |
| 2538.3011 | 3 | 2538.2999 | 0.0012  | 115 | 137 | 1 | 64.91  | 36 |
| 2660.2807 | 3 | 2660.2826 | -0.0019 | 170 | 192 | 0 | 41.93  | 37 |
| 2662.4743 | 3 | 2661.4629 | 1.0114  | 562 | 586 | 1 | 45.21  | 29 |
| 913.5594  | 2 | 913.5597  | -0.0002 | 419 | 427 | 0 | 41.98  | 33 |
| 952.5223  | 2 | 952.5229  | -0.0006 | 173 | 180 | 1 | 34.71  | 34 |
| 1024.6019 | 2 | 1024.603  | -0.0011 | 244 | 254 | 0 | 84.81  | 31 |
| 1119.5913 | 2 | 1119.5924 | -0.0011 | 21  | 30  | 0 | 44.02  | 37 |
| 1297.7393 | 2 | 1297.7394 | -0.0001 | 135 | 146 | 0 | 83.89  | 33 |
| 1450.6655 | 2 | 1450.6663 | -0.0008 | 85  | 96  | 0 | 59.47  | 36 |
| 1585.8237 | 2 | 1585.8239 | -0.0002 | 167 | 179 | 1 | 61.94  | 37 |
| 1633.892  | 3 | 1633.894  | -0.0021 | 6   | 20  | 0 | 57.7   | 35 |
| 2295.1254 | 2 | 2295.1279 | -0.0025 | 392 | 411 | 1 | 95.38  | 37 |
| 2521.3156 | 2 | 2521.3172 | -0.0016 | 255 | 278 | 1 | 79.79  | 35 |
| 2972.4186 | 3 | 2972.4107 | 0.0078  | 101 | 129 | 0 | 72.87  | 37 |
| 1196.6871 | 2 | 1196.6877 | -0.0006 | 164 | 175 | 0 | 84.93  | 33 |
| 1227.6195 | 2 | 1227.6207 | -0.0013 | 29  | 39  | 0 | 56.17  | 36 |
| 1277.6219 | 2 | 1277.6227 | -0.0008 | 243 | 252 | 0 | 50.39  | 38 |
| 1357.6077 | 2 | 1357.6084 | -0.0007 | 546 | 556 | 0 | 64.67  | 34 |
| 1472.6778 | 2 | 1472.6783 | -0.0006 | 40  | 52  | 0 | 80.67  | 35 |
| 1658.8871 | 2 | 1658.8879 | -0.0008 | 176 | 191 | 0 | 88.34  | 37 |
| 1662.8008 | 2 | 1662.8036 | -0.0027 | 60  | 74  | 0 | 82.47  | 38 |
| 1674.7213 | 2 | 1674.7234 | -0.0021 | 227 | 242 | 0 | 93.85  | 32 |
| 1679.826  | 2 | 1679.8267 | -0.0007 | 145 | 159 | 0 | 48.97  | 38 |
| 1786.9819 | 2 | 1786.9828 | -0.001  | 176 | 192 | 1 | 54.57  | 34 |
| 1965.9973 | 2 | 1965.9982 | -0.0009 | 352 | 367 | 1 | 83.92  | 37 |
| 2573.259  | 2 | 2573.2609 | -0.0018 | 368 | 393 | 0 | 129.61 | 37 |
| 3149.497  | 3 | 3148.4724 | 1.0246  | 575 | 601 | 1 | 41.23  | 36 |
| 792.4385  | 2 | 792.4382  | 0.0004  | 219 | 225 | 0 | 46.55  | 35 |
| 815.4865  | 2 | 815.4865  | 0       | 121 | 127 | 0 | 41.33  | 37 |
| 943.5812  | 2 | 943.5814  | -0.0002 | 121 | 128 | 1 | 33.84  | 33 |
| 1173.606  | 2 | 1173.607  | -0.001  | 191 | 200 | 0 | 73.98  | 38 |
| 1221.6222 | 2 | 1221.6241 | -0.0019 | 149 | 158 | 0 | 50.3   | 38 |
| 1478.7726 | 2 | 1478.7729 | -0.0003 | 147 | 158 | 1 | 81.19  | 37 |

|           |   |           |         |      |      |   |        |    |
|-----------|---|-----------|---------|------|------|---|--------|----|
| 1514.7087 | 2 | 1514.7101 | -0.0013 | 354  | 368  | 0 | 119.1  | 36 |
| 1681.8262 | 2 | 1681.8311 | -0.0049 | 88   | 101  | 0 | 71.78  | 37 |
| 1828.9904 | 2 | 1828.9903 | 0.0002  | 312  | 328  | 0 | 133.37 | 35 |
| 1845.8478 | 2 | 1845.8493 | -0.0015 | 159  | 174  | 0 | 86.38  | 35 |
| 2156.0706 | 2 | 2156.0724 | -0.0018 | 129  | 146  | 1 | 51.58  | 37 |
| 1227.6195 | 2 | 1227.6207 | -0.0013 | 29   | 39   | 0 | 56.17  | 36 |
| 1230.6398 | 2 | 1230.6391 | 0.0008  | 164  | 175  | 0 | 70.55  | 38 |
| 1277.6219 | 2 | 1277.6227 | -0.0008 | 243  | 252  | 0 | 50.39  | 38 |
| 1312.6121 | 2 | 1312.6122 | 0       | 308  | 317  | 0 | 42.09  | 36 |
| 1357.6077 | 2 | 1357.6084 | -0.0007 | 546  | 556  | 0 | 64.67  | 34 |
| 1411.7409 | 2 | 1411.742  | -0.0011 | 335  | 348  | 0 | 74.23  | 36 |
| 1472.6778 | 2 | 1472.6783 | -0.0006 | 40   | 52   | 0 | 80.67  | 35 |
| 1539.7495 | 2 | 1539.7504 | -0.0009 | 306  | 317  | 1 | 58.41  | 37 |
| 1580.812  | 2 | 1580.812  | 0       | 117  | 130  | 0 | 50.7   | 37 |
| 1658.8871 | 2 | 1658.8879 | -0.0008 | 176  | 191  | 0 | 88.34  | 37 |
| 1664.7809 | 2 | 1664.7828 | -0.0019 | 60   | 74   | 0 | 63.77  | 37 |
| 1674.7213 | 2 | 1674.7234 | -0.0021 | 227  | 242  | 0 | 93.85  | 32 |
| 1679.826  | 2 | 1679.8267 | -0.0007 | 145  | 159  | 0 | 48.97  | 38 |
| 1786.9819 | 2 | 1786.9828 | -0.001  | 176  | 192  | 1 | 54.57  | 34 |
| 1965.9973 | 2 | 1965.9982 | -0.0009 | 352  | 367  | 1 | 83.92  | 37 |
| 2573.259  | 2 | 2573.2609 | -0.0018 | 368  | 393  | 0 | 129.61 | 37 |
| 914.5798  | 2 | 914.58    | -0.0002 | 1793 | 1801 | 0 | 52.38  | 29 |
| 954.5865  | 2 | 954.5862  | 0.0003  | 858  | 866  | 0 | 40.04  | 30 |
| 1034.5758 | 2 | 1034.576  | -0.0003 | 11   | 19   | 0 | 50.28  | 35 |
| 1112.5498 | 2 | 1112.5502 | -0.0004 | 1291 | 1299 | 0 | 54.78  | 35 |
| 1379.7553 | 2 | 1378.7497 | 1.0057  | 4357 | 4368 | 0 | 60.46  | 34 |
| 1419.7721 | 2 | 1419.7722 | -0.0001 | 2674 | 2686 | 0 | 93.7   | 36 |
| 1477.6713 | 2 | 1477.6732 | -0.0019 | 1896 | 1909 | 0 | 53.16  | 35 |
| 1501.7164 | 2 | 1501.7195 | -0.0031 | 4262 | 4275 | 0 | 58.56  | 36 |
| 1540.8403 | 2 | 1540.8395 | 0.0008  | 4372 | 4384 | 0 | 45.91  | 35 |
| 1618.893  | 2 | 1618.893  | 0       | 3071 | 3085 | 0 | 103.39 | 34 |
| 1885.0912 | 2 | 1885.0924 | -0.0012 | 4280 | 4296 | 0 | 51.63  | 27 |
| 1944.9821 | 2 | 1944.9833 | -0.0011 | 1587 | 1602 | 0 | 43.18  | 37 |
| 2066.0842 | 3 | 2066.0836 | 0.0006  | 135  | 152  | 0 | 47.15  | 36 |
| 2092.0872 | 2 | 2092.0874 | -0.0002 | 4244 | 4261 | 0 | 103.64 | 36 |
| 2198.0586 | 2 | 2198.0605 | -0.0019 | 995  | 1014 | 0 | 109.13 | 37 |
| 2526.1382 | 3 | 2526.1412 | -0.003  | 2688 | 2708 | 0 | 40.98  | 34 |
| 1204.8159 | 2 | 1204.8159 | 0.0001  | 1902 | 1912 | 0 | 51.56  | 20 |
| 1233.6025 | 2 | 1233.6023 | 0.0001  | 1954 | 1964 | 0 | 46.71  | 38 |
| 1361.7389 | 2 | 1361.7377 | 0.0012  | 1194 | 1205 | 0 | 67.47  | 36 |
| 1373.7589 | 2 | 1373.7588 | 0.0001  | 1301 | 1313 | 0 | 69.13  | 36 |
| 1760.9493 | 2 | 1760.9495 | -0.0001 | 1939 | 1953 | 0 | 94.71  | 35 |
| 2048.0982 | 2 | 2048.0983 | 0       | 957  | 974  | 0 | 113.82 | 35 |
| 2193.225  | 2 | 2193.2256 | -0.0006 | 440  | 459  | 0 | 112.67 | 30 |
| 2239.1692 | 3 | 2239.1696 | -0.0004 | 2495 | 2515 | 0 | 90.47  | 36 |
| 2735.5257 | 3 | 2735.5255 | 0.0002  | 436  | 459  | 1 | 67.07  | 27 |
| 3140.7538 | 3 | 3139.7394 | 1.0144  | 1537 | 1565 | 0 | 51.47  | 26 |
| 1157.6441 | 2 | 1157.6445 | -0.0004 | 175  | 186  | 0 | 39.64  | 37 |
| 1161.5795 | 2 | 1161.5778 | 0.0017  | 340  | 350  | 0 | 75.18  | 38 |
| 1272.6374 | 2 | 1272.635  | 0.0024  | 329  | 339  | 0 | 69.83  | 37 |
| 1275.6822 | 2 | 1275.6823 | 0       | 192  | 203  | 0 | 64.91  | 37 |
| 1381.6488 | 2 | 1381.6482 | 0.0006  | 351  | 362  | 0 | 62.71  | 37 |
| 1391.7518 | 2 | 1391.7516 | 0.0002  | 104  | 115  | 0 | 84.77  | 36 |
| 1706.9193 | 3 | 1706.9203 | -0.001  | 204  | 219  | 1 | 51.13  | 36 |
| 1799.9458 | 2 | 1799.9491 | -0.0033 | 153  | 167  | 0 | 71.86  | 36 |
| 1936.9559 | 2 | 1935.9612 | 0.9947  | 262  | 278  | 0 | 93.5   | 38 |
| 2223.205  | 3 | 2222.2019 | 1.0031  | 55   | 74   | 1 | 63.95  | 32 |
| 3243.5476 | 3 | 3243.5506 | -0.0031 | 120  | 149  | 0 | 75.78  | 36 |

|           |   |           |         |      |      |   |        |    |
|-----------|---|-----------|---------|------|------|---|--------|----|
| 1151.7063 | 2 | 1151.7067 | -0.0004 | 157  | 167  | 0 | 52.9   | 24 |
| 1227.5615 | 2 | 1227.5628 | -0.0012 | 172  | 181  | 0 | 44.64  | 34 |
| 1696.7546 | 2 | 1696.754  | 0.0006  | 73   | 87   | 0 | 100.03 | 34 |
| 1727.7411 | 2 | 1727.743  | -0.0019 | 222  | 236  | 0 | 50.83  | 31 |
| 1779.8017 | 2 | 1779.8025 | -0.0008 | 378  | 392  | 0 | 57.87  | 35 |
| 2149.124  | 2 | 2149.1242 | -0.0001 | 278  | 296  | 0 | 143.82 | 36 |
| 2192.3088 | 3 | 2192.3085 | 0.0002  | 148  | 167  | 1 | 51.79  | 21 |
| 2346.179  | 2 | 2346.1815 | -0.0025 | 410  | 432  | 0 | 157.26 | 37 |
| 843.4993  | 2 | 843.5     | -0.0007 | 75   | 82   | 0 | 58.11  | 37 |
| 1034.482  | 2 | 1034.4821 | -0.0001 | 88   | 95   | 0 | 48.52  | 36 |
| 1062.5906 | 2 | 1062.5921 | -0.0014 | 96   | 105  | 0 | 45.79  | 36 |
| 1165.5976 | 2 | 1165.5979 | -0.0003 | 40   | 50   | 0 | 80.29  | 37 |
| 1235.7349 | 2 | 1235.735  | -0.0001 | 970  | 980  | 0 | 41.85  | 28 |
| 1708.7894 | 2 | 1708.7913 | -0.0018 | 902  | 915  | 0 | 76.87  | 36 |
| 1727.8647 | 2 | 1727.8665 | -0.0017 | 462  | 477  | 0 | 61.63  | 37 |
| 2379.1236 | 2 | 2379.1246 | -0.0009 | 874  | 893  | 0 | 82.32  | 37 |
| 2503.2466 | 2 | 2503.2476 | -0.0009 | 270  | 292  | 0 | 120.38 | 37 |
| 2783.3739 | 4 | 2783.3739 | 0       | 437  | 461  | 0 | 39.82  | 37 |
| 2883.4308 | 3 | 2883.4324 | -0.0016 | 1004 | 1029 | 0 | 41.68  | 37 |
| 3196.6117 | 3 | 3196.6099 | 0.0018  | 236  | 265  | 0 | 41.31  | 36 |
| 3316.6552 | 3 | 3315.6445 | 1.0106  | 478  | 508  | 0 | 67.55  | 36 |
| 865.5136  | 2 | 865.5134  | 0.0003  | 349  | 355  | 0 | 44.82  | 30 |
| 1157.6441 | 2 | 1157.6445 | -0.0004 | 206  | 217  | 0 | 39.64  | 37 |
| 1166.5312 | 2 | 1166.5316 | -0.0004 | 279  | 288  | 1 | 60.96  | 35 |
| 1194.5506 | 2 | 1194.5517 | -0.0011 | 371  | 381  | 0 | 91.99  | 35 |
| 1294.6339 | 2 | 1294.634  | -0.0001 | 223  | 234  | 0 | 47.65  | 37 |
| 1644.8836 | 2 | 1643.8705 | 1.0131  | 235  | 250  | 0 | 78.79  | 36 |
| 1966.9303 | 2 | 1966.9306 | -0.0003 | 293  | 309  | 0 | 151.24 | 37 |
| 2257.0724 | 3 | 2256.0658 | 1.0066  | 395  | 414  | 0 | 50.6   | 37 |
| 3831.7942 | 3 | 3830.8044 | 0.9898  | 68   | 101  | 0 | 58.16  | 34 |
| 1247.6756 | 2 | 1247.6761 | -0.0006 | 393  | 403  | 0 | 69.07  | 36 |
| 1248.5577 | 2 | 1248.5582 | -0.0005 | 547  | 558  | 0 | 50.58  | 34 |
| 1326.6296 | 2 | 1326.6303 | -0.0007 | 581  | 592  | 0 | 80.29  | 36 |
| 1360.737  | 2 | 1360.7351 | 0.0019  | 160  | 172  | 0 | 54.27  | 37 |
| 1416.727  | 2 | 1416.7283 | -0.0013 | 377  | 389  | 0 | 94.8   | 38 |
| 1476.757  | 2 | 1476.7573 | -0.0002 | 107  | 120  | 0 | 48.92  | 38 |
| 1812.9462 | 2 | 1812.9469 | -0.0007 | 601  | 617  | 0 | 125.35 | 36 |
| 1938.9996 | 2 | 1937.9993 | 1.0003  | 408  | 427  | 0 | 55.49  | 36 |
| 2070.0847 | 3 | 2070.0844 | 0.0003  | 599  | 617  | 1 | 56.38  | 36 |
| 2824.6208 | 3 | 2824.6202 | 0.0007  | 428  | 454  | 1 | 65.07  | 23 |
| 3077.4619 | 3 | 3077.4618 | 0.0001  | 264  | 290  | 1 | 73.48  | 36 |
| 815.4865  | 2 | 815.4865  | 0       | 121  | 127  | 0 | 41.33  | 37 |
| 943.5812  | 2 | 943.5814  | -0.0002 | 121  | 128  | 1 | 33.84  | 33 |
| 1173.606  | 2 | 1173.607  | -0.001  | 191  | 200  | 0 | 73.98  | 38 |
| 1221.6222 | 2 | 1221.6241 | -0.0019 | 149  | 158  | 0 | 50.3   | 38 |
| 1478.7726 | 2 | 1478.7729 | -0.0003 | 147  | 158  | 1 | 81.19  | 37 |
| 1514.7087 | 2 | 1514.7101 | -0.0013 | 354  | 368  | 0 | 119.1  | 36 |
| 1764.9042 | 2 | 1764.9046 | -0.0005 | 88   | 102  | 0 | 107.5  | 37 |
| 1799.9308 | 2 | 1799.9305 | 0.0003  | 46   | 63   | 0 | 74.9   | 37 |
| 1821.957  | 2 | 1821.9584 | -0.0014 | 335  | 351  | 0 | 93.59  | 36 |
| 2156.0706 | 2 | 2156.0724 | -0.0018 | 129  | 146  | 1 | 51.58  | 37 |
| 2735.3084 | 3 | 2735.3079 | 0.0005  | 64   | 87   | 0 | 38.22  | 37 |
| 1018.5057 | 2 | 1018.5043 | 0.0014  | 805  | 815  | 0 | 91.13  | 38 |
| 1186.6296 | 2 | 1186.6306 | -0.001  | 575  | 585  | 0 | 66.74  | 38 |
| 1276.7026 | 2 | 1276.7027 | -0.0001 | 779  | 789  | 0 | 43     | 35 |
| 1282.6161 | 2 | 1282.6162 | -0.0001 | 543  | 553  | 0 | 58.79  | 36 |
| 1423.7563 | 2 | 1423.7567 | -0.0004 | 478  | 489  | 0 | 79.25  | 35 |
| 1441.7997 | 3 | 1441.8001 | -0.0005 | 573  | 585  | 1 | 46.89  | 36 |

|           |   |           |         |     |     |   |        |    |
|-----------|---|-----------|---------|-----|-----|---|--------|----|
| 1442.7764 | 2 | 1442.7769 | -0.0005 | 261 | 272 | 0 | 53.81  | 36 |
| 1461.7617 | 2 | 1461.7616 | 0.0001  | 683 | 694 | 0 | 79.74  | 38 |
| 1643.9353 | 2 | 1643.9354 | -0.0001 | 310 | 323 | 0 | 109.19 | 31 |
| 2484.2107 | 3 | 2484.2107 | 0       | 385 | 404 | 1 | 94.08  | 37 |
| 960.4128  | 2 | 960.4124  | 0.0004  | 544 | 552 | 0 | 54.7   | 29 |
| 1071.5387 | 2 | 1071.5383 | 0.0005  | 133 | 142 | 0 | 41.74  | 35 |
| 1186.6952 | 2 | 1186.6962 | -0.0009 | 155 | 165 | 0 | 43     | 33 |
| 1197.5436 | 2 | 1197.5448 | -0.0012 | 482 | 493 | 0 | 65.03  | 35 |
| 1465.8178 | 2 | 1465.8187 | -0.001  | 176 | 188 | 1 | 51.35  | 33 |
| 1499.6784 | 2 | 1499.6787 | -0.0003 | 375 | 387 | 0 | 71.76  | 35 |
| 1540.9594 | 3 | 1540.9592 | 0.0002  | 155 | 168 | 1 | 41.07  | 20 |
| 1814.9034 | 2 | 1814.905  | -0.0017 | 319 | 335 | 0 | 106.2  | 37 |
| 2243.1805 | 3 | 2243.1811 | -0.0006 | 390 | 410 | 1 | 61.71  | 36 |
| 2409.127  | 2 | 2409.1304 | -0.0034 | 200 | 221 | 0 | 77.01  | 36 |
| 2583.3389 | 3 | 2583.3392 | -0.0003 | 92  | 117 | 1 | 74.77  | 35 |
| 2904.4744 | 3 | 2904.477  | -0.0026 | 411 | 435 | 0 | 41.49  | 36 |
| 832.4593  | 2 | 832.4555  | 0.0038  | 8   | 15  | 0 | 45.83  | 37 |
| 1139.6363 | 2 | 1139.6373 | -0.001  | 328 | 337 | 0 | 55.77  | 33 |
| 1147.6605 | 3 | 1147.6601 | 0.0004  | 303 | 313 | 1 | 42.39  | 33 |
| 1433.748  | 2 | 1433.7514 | -0.0034 | 205 | 219 | 0 | 41.49  | 38 |
| 1497.8397 | 2 | 1497.8403 | -0.0006 | 239 | 252 | 0 | 115.54 | 34 |
| 1675.9656 | 3 | 1675.9661 | -0.0005 | 70  | 84  | 1 | 56.38  | 29 |
| 1760.7782 | 2 | 1760.7794 | -0.0012 | 314 | 327 | 0 | 75.41  | 33 |
| 2032.0662 | 2 | 2032.0663 | -0.0001 | 172 | 190 | 0 | 109.33 | 36 |
| 2171.0008 | 2 | 2171.0019 | -0.001  | 276 | 295 | 0 | 108.57 | 36 |
| 2629.3891 | 3 | 2629.3898 | -0.0007 | 167 | 190 | 1 | 73.5   | 34 |
| 1129.5616 | 2 | 1129.5615 | 0.0001  | 613 | 622 | 0 | 61.54  | 36 |
| 1189.6703 | 2 | 1189.6707 | -0.0003 | 398 | 408 | 0 | 52.16  | 35 |
| 1234.5672 | 2 | 1234.5677 | -0.0005 | 552 | 563 | 0 | 74.63  | 36 |
| 1416.7205 | 2 | 1416.7209 | -0.0003 | 112 | 125 | 0 | 56.4   | 38 |
| 1416.727  | 2 | 1416.7283 | -0.0013 | 382 | 394 | 0 | 94.8   | 38 |
| 1820.9007 | 2 | 1820.9017 | -0.001  | 472 | 488 | 0 | 105.45 | 38 |
| 1868.9904 | 3 | 1867.9891 | 1.0014  | 606 | 622 | 1 | 52.48  | 35 |
| 1938.9996 | 2 | 1937.9993 | 1.0003  | 413 | 432 | 0 | 55.49  | 36 |
| 2455.394  | 2 | 2455.3938 | 0.0003  | 437 | 459 | 0 | 87.29  | 27 |
| 954.5649  | 2 | 954.5651  | -0.0002 | 461 | 468 | 0 | 39.03  | 31 |
| 1090.5913 | 2 | 1090.591  | 0.0003  | 496 | 504 | 0 | 41.4   | 37 |
| 1316.7157 | 2 | 1316.7162 | -0.0005 | 219 | 230 | 0 | 61.05  | 37 |
| 1608.8707 | 2 | 1608.8722 | -0.0016 | 310 | 324 | 0 | 61.25  | 35 |
| 1650.8108 | 2 | 1650.8114 | -0.0006 | 169 | 183 | 0 | 83.1   | 38 |
| 1701.7304 | 2 | 1701.7304 | -0.0001 | 258 | 273 | 0 | 101.55 | 31 |
| 1970.0456 | 3 | 1970.0473 | -0.0017 | 478 | 495 | 0 | 45.52  | 35 |
| 2196.0998 | 2 | 2196.1022 | -0.0024 | 197 | 218 | 0 | 90.57  | 37 |
| 2342.2073 | 3 | 2341.1968 | 1.0105  | 280 | 299 | 1 | 80.46  | 36 |
| 2657.3388 | 3 | 2656.3418 | 0.997   | 365 | 386 | 0 | 70.17  | 37 |
| 3156.613  | 3 | 3156.6125 | 0.0005  | 116 | 145 | 0 | 70.39  | 35 |
| 743.3751  | 2 | 743.3755  | -0.0004 | 392 | 397 | 0 | 39.7   | 33 |
| 1451.682  | 2 | 1451.6834 | -0.0014 | 244 | 255 | 0 | 66.25  | 36 |
| 1501.67   | 2 | 1501.6718 | -0.0019 | 593 | 606 | 0 | 137.51 | 34 |
| 1798.9235 | 2 | 1798.9254 | -0.0018 | 771 | 786 | 0 | 70.69  | 37 |
| 1806.9194 | 3 | 1806.9224 | -0.003  | 464 | 479 | 1 | 53.77  | 38 |
| 2256.1956 | 2 | 2256.1961 | -0.0005 | 33  | 55  | 0 | 109.74 | 35 |
| 2399.1577 | 3 | 2398.1553 | 1.0024  | 349 | 368 | 1 | 71.14  | 37 |
| 2931.4242 | 3 | 2931.425  | -0.0008 | 94  | 120 | 0 | 103.31 | 37 |
| 3221.6198 | 4 | 3221.6188 | 0.001   | 321 | 348 | 0 | 36.57  | 36 |
| 1041.4881 | 2 | 1041.488  | 0.0002  | 364 | 372 | 0 | 49.94  | 34 |
| 1219.6373 | 2 | 1219.6383 | -0.0011 | 388 | 397 | 0 | 75.43  | 38 |
| 1255.6446 | 2 | 1255.6448 | -0.0002 | 589 | 598 | 0 | 70.09  | 35 |

|           |   |           |         |     |     |   |        |    |
|-----------|---|-----------|---------|-----|-----|---|--------|----|
| 1324.6736 | 3 | 1324.6735 | 0.0001  | 412 | 422 | 1 | 40.27  | 37 |
| 1469.7857 | 2 | 1469.7878 | -0.0021 | 143 | 156 | 0 | 59.99  | 36 |
| 1648.7857 | 2 | 1648.7879 | -0.0022 | 258 | 272 | 0 | 113.25 | 37 |
| 1664.8396 | 2 | 1664.841  | -0.0014 | 677 | 692 | 0 | 113.75 | 38 |
| 2415.212  | 2 | 2415.2142 | -0.0022 | 563 | 585 | 0 | 118.17 | 37 |
| 1343.7413 | 2 | 1343.7409 | 0.0004  | 84  | 96  | 0 | 90.75  | 37 |
| 1640.821  | 2 | 1640.8192 | 0.0018  | 181 | 195 | 0 | 41.84  | 37 |
| 1729.8263 | 2 | 1729.8271 | -0.0008 | 517 | 532 | 0 | 103.33 | 37 |
| 1942.9255 | 3 | 1942.9261 | -0.0006 | 376 | 391 | 0 | 39.14  | 37 |
| 2149.0952 | 2 | 2149.0977 | -0.0024 | 427 | 446 | 0 | 162.24 | 37 |
| 2679.3406 | 3 | 2679.3405 | 0.0001  | 486 | 510 | 0 | 65.68  | 37 |
| 971.5664  | 2 | 971.5651  | 0.0013  | 253 | 261 | 0 | 41.78  | 36 |
| 1082.5857 | 2 | 1082.5873 | -0.0015 | 26  | 35  | 1 | 36.86  | 34 |
| 1236.6453 | 2 | 1236.6462 | -0.001  | 241 | 252 | 0 | 61.05  | 37 |
| 1286.7015 | 2 | 1286.7016 | -0.0001 | 400 | 411 | 0 | 45.27  | 37 |
| 1435.8141 | 3 | 1435.8147 | -0.0005 | 337 | 349 | 1 | 35.09  | 31 |
| 1750.8557 | 2 | 1750.856  | -0.0003 | 311 | 325 | 0 | 126.05 | 38 |
| 2144.102  | 2 | 2144.1001 | 0.002   | 182 | 201 | 0 | 119.03 | 37 |
| 2157.1388 | 2 | 2157.1425 | -0.0037 | 159 | 178 | 0 | 82.04  | 36 |
| 2204.1292 | 2 | 2203.126  | 1.0032  | 276 | 296 | 0 | 115.42 | 37 |
| 1203.6149 | 2 | 1203.6136 | 0.0013  | 82  | 92  | 0 | 45.84  | 38 |
| 1289.6094 | 2 | 1289.6099 | -0.0005 | 425 | 436 | 0 | 87.66  | 36 |
| 1478.7382 | 2 | 1478.7405 | -0.0024 | 242 | 254 | 0 | 60.6   | 38 |
| 1649.7844 | 2 | 1649.7857 | -0.0012 | 125 | 141 | 0 | 149.81 | 37 |
| 1752.92   | 2 | 1752.9192 | 0.0008  | 103 | 119 | 0 | 118.28 | 36 |
| 2138.1503 | 3 | 2138.1518 | -0.0014 | 59  | 79  | 1 | 50.41  | 34 |
| 2249.2876 | 2 | 2249.2882 | -0.0006 | 289 | 310 | 0 | 83.17  | 27 |
| 2518.4723 | 3 | 2518.4734 | -0.0011 | 289 | 312 | 1 | 34.76  | 22 |
| 2848.6289 | 3 | 2848.6273 | 0.0016  | 284 | 310 | 1 | 38.74  | 23 |
| 975.4409  | 2 | 975.441   | -0.0001 | 21  | 30  | 0 | 63.16  | 33 |
| 1143.5534 | 2 | 1143.5529 | 0.0005  | 42  | 52  | 0 | 67.35  | 35 |
| 1175.5282 | 2 | 1175.5281 | 0.0001  | 199 | 208 | 0 | 48.59  | 34 |
| 1197.6975 | 2 | 1197.6982 | -0.0007 | 31  | 41  | 1 | 49.12  | 33 |
| 1773.8873 | 2 | 1773.8897 | -0.0024 | 241 | 256 | 0 | 98.46  | 38 |
| 1854.922  | 2 | 1854.9251 | -0.0031 | 218 | 233 | 0 | 98.16  | 37 |
| 1953.0573 | 2 | 1953.0571 | 0.0002  | 98  | 115 | 0 | 55.13  | 34 |
| 3150.6316 | 3 | 3150.635  | -0.0034 | 150 | 179 | 0 | 96.21  | 34 |
| 1092.4647 | 2 | 1092.4658 | -0.0011 | 72  | 80  | 0 | 33.59  | 31 |
| 1192.6548 | 2 | 1192.6564 | -0.0016 | 138 | 147 | 0 | 65.85  | 35 |
| 1216.5968 | 2 | 1216.5989 | -0.0021 | 321 | 330 | 0 | 53.94  | 36 |
| 1279.623  | 2 | 1279.6231 | -0.0001 | 207 | 217 | 0 | 78.08  | 37 |
| 1422.6565 | 2 | 1422.6568 | -0.0002 | 183 | 193 | 0 | 60.2   | 36 |
| 1482.8139 | 2 | 1482.8155 | -0.0015 | 102 | 116 | 0 | 95.8   | 34 |
| 1601.8628 | 2 | 1601.8633 | -0.0005 | 306 | 320 | 0 | 93.83  | 36 |
| 2032.0665 | 3 | 2032.0688 | -0.0023 | 346 | 365 | 1 | 37.83  | 36 |
| 942.5014  | 2 | 942.5022  | -0.0008 | 191 | 198 | 1 | 42.78  | 35 |
| 1282.7489 | 2 | 1282.7496 | -0.0008 | 115 | 127 | 0 | 41.33  | 32 |
| 1302.7435 | 2 | 1302.7435 | 0       | 136 | 146 | 0 | 53.81  | 33 |
| 1309.6128 | 2 | 1309.6125 | 0.0003  | 270 | 280 | 0 | 84.25  | 37 |
| 1379.6384 | 2 | 1379.6391 | -0.0007 | 290 | 302 | 0 | 40.09  | 37 |
| 1493.7463 | 2 | 1493.7474 | -0.0011 | 14  | 26  | 0 | 86.22  | 38 |
| 1512.8298 | 3 | 1512.83   | -0.0002 | 204 | 216 | 0 | 69.72  | 35 |
| 1534.9455 | 2 | 1534.9447 | 0.0008  | 162 | 175 | 1 | 58.73  | 20 |
| 1752.8498 | 2 | 1752.8505 | -0.0007 | 147 | 161 | 0 | 72.42  | 37 |
| 1071.5387 | 2 | 1071.5383 | 0.0005  | 145 | 154 | 0 | 41.74  | 35 |
| 1183.5279 | 2 | 1183.5292 | -0.0013 | 494 | 505 | 0 | 69.89  | 34 |
| 1186.6952 | 2 | 1186.6962 | -0.0009 | 167 | 177 | 0 | 43     | 33 |
| 1273.6662 | 2 | 1273.6666 | -0.0004 | 483 | 493 | 0 | 52.67  | 38 |

|           |   |           |         |      |      |   |        |    |
|-----------|---|-----------|---------|------|------|---|--------|----|
| 1483.6824 | 2 | 1483.6838 | -0.0014 | 387  | 399  | 0 | 63.3   | 36 |
| 1536.8366 | 3 | 1536.8372 | -0.0006 | 457  | 470  | 1 | 37.88  | 35 |
| 1540.9594 | 3 | 1540.9592 | 0.0002  | 167  | 180  | 1 | 41.07  | 20 |
| 1795.7385 | 2 | 1795.7398 | -0.0013 | 569  | 588  | 0 | 107.93 | 28 |
| 1802.8498 | 2 | 1802.8509 | -0.0011 | 331  | 347  | 0 | 61.58  | 36 |
| 2193.1539 | 3 | 2193.1542 | -0.0003 | 402  | 422  | 1 | 58.41  | 35 |
| 2409.127  | 2 | 2409.1304 | -0.0034 | 212  | 233  | 0 | 77.01  | 36 |
| 840.5177  | 2 | 840.5181  | -0.0004 | 269  | 276  | 0 | 42.89  | 29 |
| 1323.7761 | 2 | 1323.7762 | -0.0001 | 139  | 151  | 0 | 61.75  | 28 |
| 1372.6353 | 2 | 1372.6358 | -0.0004 | 257  | 268  | 0 | 45.18  | 35 |
| 1598.8079 | 2 | 1598.8086 | -0.0007 | 161  | 174  | 0 | 88.51  | 37 |
| 1661.8281 | 2 | 1661.8294 | -0.0013 | 239  | 253  | 0 | 109.57 | 38 |
| 2442.1634 | 3 | 2442.1633 | 0.0001  | 46   | 67   | 0 | 58.49  | 37 |
| 3300.6868 | 3 | 3300.6878 | -0.001  | 7    | 39   | 0 | 82.22  | 35 |
| 919.4797  | 2 | 919.4797  | 0.0001  | 43   | 52   | 0 | 55.85  | 38 |
| 940.5014  | 2 | 940.5018  | -0.0004 | 63   | 70   | 0 | 38.97  | 34 |
| 1047.5744 | 2 | 1047.5746 | -0.0002 | 43   | 53   | 1 | 39.99  | 37 |
| 1438.6786 | 2 | 1438.6801 | -0.0015 | 27   | 42   | 0 | 99.57  | 37 |
| 2155.0164 | 2 | 2155.0181 | -0.0017 | 71   | 89   | 1 | 119.31 | 37 |
| 1160.6025 | 2 | 1160.6037 | -0.0012 | 259  | 268  | 0 | 59.07  | 38 |
| 1317.753  | 2 | 1317.7544 | -0.0014 | 793  | 804  | 0 | 49.71  | 33 |
| 1446.8071 | 2 | 1446.8082 | -0.0011 | 330  | 343  | 0 | 113    | 34 |
| 1569.8103 | 2 | 1569.8111 | -0.0008 | 1288 | 1302 | 0 | 108.97 | 36 |
| 1889.9854 | 2 | 1889.9847 | 0.0007  | 440  | 458  | 0 | 149.34 | 37 |
| 2015.0402 | 3 | 2015.0411 | -0.0009 | 845  | 860  | 0 | 41.97  | 37 |
| 1157.6441 | 2 | 1157.6445 | -0.0004 | 197  | 208  | 0 | 39.64  | 37 |
| 1324.6264 | 2 | 1324.6268 | -0.0004 | 374  | 385  | 0 | 52.41  | 36 |
| 1478.8569 | 3 | 1478.8569 | 0       | 311  | 323  | 1 | 49.74  | 30 |
| 1921.9448 | 2 | 1921.9455 | -0.0007 | 285  | 301  | 0 | 122.58 | 38 |
| 2086.995  | 2 | 2086.9993 | -0.0043 | 252  | 270  | 0 | 108.01 | 37 |
| 1475.7663 | 2 | 1475.7654 | 0.0009  | 580  | 592  | 0 | 59.12  | 38 |
| 1524.8987 | 2 | 1524.8988 | 0       | 1069 | 1083 | 0 | 109.56 | 29 |
| 1940.0499 | 2 | 1940.052  | -0.0021 | 810  | 827  | 0 | 123.35 | 34 |
| 2466.2402 | 3 | 2465.2285 | 1.0117  | 1146 | 1169 | 1 | 82.57  | 37 |
| 1054.5272 | 2 | 1054.527  | 0.0003  | 1508 | 1515 | 0 | 45.92  | 35 |
| 1101.5934 | 2 | 1101.5931 | 0.0003  | 629  | 638  | 0 | 49.3   | 38 |
| 1279.7864 | 2 | 1279.7864 | 0.0001  | 802  | 814  | 0 | 86.63  | 24 |
| 1316.7119 | 2 | 1316.7122 | -0.0003 | 539  | 550  | 0 | 48.28  | 37 |
| 1704.8517 | 2 | 1704.8505 | 0.0012  | 1271 | 1284 | 0 | 93.58  | 38 |
| 2130.0434 | 2 | 2130.0441 | -0.0006 | 39   | 60   | 0 | 103.45 | 37 |
| 2201.1761 | 3 | 2201.1766 | -0.0005 | 363  | 382  | 0 | 42.15  | 35 |
| 2365.0511 | 3 | 2365.0517 | -0.0006 | 1643 | 1665 | 1 | 39     | 34 |
| 2411.1934 | 2 | 2411.193  | 0.0004  | 1008 | 1029 | 0 | 58.2   | 37 |
| 2510.3534 | 3 | 2509.3403 | 1.0131  | 1097 | 1117 | 1 | 34.31  | 33 |
| 766.3868  | 2 | 766.3861  | 0.0007  | 326  | 332  | 0 | 51.03  | 36 |
| 916.574   | 2 | 916.5746  | -0.0006 | 367  | 374  | 0 | 31.23  | 26 |
| 1206.6245 | 2 | 1206.6245 | 0.0001  | 354  | 366  | 0 | 50.24  | 38 |
| 1210.5982 | 2 | 1210.5983 | -0.0001 | 228  | 237  | 0 | 59.71  | 37 |
| 1359.7054 | 2 | 1359.7068 | -0.0013 | 106  | 116  | 0 | 62.16  | 38 |
| 1407.7143 | 3 | 1407.7147 | -0.0004 | 134  | 145  | 1 | 40.88  | 38 |
| 2031.0124 | 2 | 2031.0136 | -0.0011 | 76   | 95   | 0 | 87.54  | 37 |
| 2105.188  | 3 | 2105.1885 | -0.0004 | 354  | 374  | 1 | 50.14  | 29 |
| 1009.4822 | 2 | 1009.4829 | -0.0007 | 475  | 483  | 0 | 38.26  | 36 |
| 1315.6615 | 2 | 1315.6619 | -0.0004 | 181  | 194  | 0 | 64.58  | 37 |
| 1559.8018 | 2 | 1559.8042 | -0.0024 | 124  | 138  | 0 | 97.34  | 38 |
| 2115.0066 | 2 | 2115.0062 | 0.0005  | 41   | 60   | 0 | 101.68 | 37 |
| 2375.1064 | 2 | 2375.107  | -0.0006 | 139  | 160  | 0 | 128.12 | 36 |
| 3395.6446 | 3 | 3395.6442 | 0.0003  | 422  | 454  | 1 | 51.48  | 36 |

|           |   |           |         |     |     |   |        |    |
|-----------|---|-----------|---------|-----|-----|---|--------|----|
| 1934.0255 | 2 | 1934.0262 | -0.0006 | 180 | 197 | 0 | 109.89 | 36 |
| 2090.1268 | 3 | 2090.1273 | -0.0004 | 180 | 198 | 1 | 77.63  | 34 |
| 2430.233  | 2 | 2430.2319 | 0.0012  | 249 | 271 | 0 | 104.19 | 37 |
| 2483.217  | 2 | 2483.2166 | 0.0004  | 91  | 113 | 0 | 129.6  | 37 |
| 1212.671  | 2 | 1212.6714 | -0.0004 | 296 | 306 | 0 | 87.6   | 35 |
| 1587.7839 | 2 | 1587.7852 | -0.0013 | 228 | 243 | 0 | 108.6  | 37 |
| 1632.7942 | 2 | 1631.7865 | 1.0077  | 249 | 262 | 0 | 62.57  | 37 |
| 1666.9003 | 2 | 1666.9002 | 0.0001  | 325 | 340 | 0 | 107.63 | 34 |
| 1767.7778 | 3 | 1767.7787 | -0.001  | 131 | 145 | 0 | 59.85  | 33 |
| 1154.6401 | 2 | 1154.6408 | -0.0006 | 192 | 203 | 0 | 55.73  | 33 |
| 1344.6373 | 2 | 1344.6384 | -0.0011 | 571 | 581 | 0 | 37.89  | 36 |
| 1493.714  | 2 | 1493.7151 | -0.0011 | 68  | 80  | 0 | 75.8   | 37 |
| 1535.7423 | 3 | 1535.744  | -0.0018 | 54  | 67  | 0 | 44.55  | 38 |
| 1658.8871 | 2 | 1658.8879 | -0.0008 | 204 | 219 | 0 | 88.34  | 37 |
| 1786.9819 | 2 | 1786.9828 | -0.001  | 204 | 220 | 1 | 54.57  | 34 |
| 2051.9874 | 2 | 2052.0052 | -0.0177 | 313 | 330 | 0 | 104.14 | 37 |
| 910.4913  | 2 | 910.4913  | 0.0001  | 125 | 131 | 0 | 47.28  | 34 |
| 1235.6125 | 2 | 1235.6146 | -0.002  | 16  | 26  | 1 | 39.04  | 38 |
| 1292.6714 | 2 | 1292.6725 | -0.0011 | 92  | 102 | 0 | 64.41  | 38 |
| 1368.6243 | 2 | 1368.6245 | -0.0002 | 225 | 235 | 0 | 39.7   | 35 |
| 1576.843  | 2 | 1576.8461 | -0.003  | 110 | 124 | 0 | 86.09  | 37 |
| 1613.9054 | 2 | 1613.9062 | -0.0008 | 433 | 446 | 0 | 95.4   | 33 |
| 1668.8224 | 2 | 1668.822  | 0.0004  | 181 | 196 | 0 | 83.56  | 37 |
| 2012.1783 | 3 | 2012.1782 | 0       | 294 | 311 | 0 | 50.82  | 23 |
| 2545.3904 | 4 | 2544.3846 | 1.0058  | 197 | 219 | 1 | 39.74  | 31 |
| 4142.1533 | 4 | 4142.1549 | -0.0016 | 158 | 196 | 1 | 35.4   | 31 |
| 764.4198  | 2 | 764.4181  | 0.0017  | 281 | 287 | 0 | 38.56  | 35 |
| 872.5079  | 2 | 872.508   | -0.0001 | 292 | 300 | 0 | 45.68  | 38 |
| 978.4666  | 2 | 978.4672  | -0.0006 | 365 | 373 | 0 | 52.8   | 36 |
| 1205.6027 | 2 | 1205.604  | -0.0013 | 61  | 70  | 0 | 68.14  | 38 |
| 1452.7462 | 2 | 1452.7474 | -0.0011 | 238 | 252 | 0 | 84.08  | 37 |
| 1469.7272 | 2 | 1469.7258 | 0.0014  | 48  | 60  | 0 | 116.03 | 37 |
| 1808.8229 | 2 | 1808.8251 | -0.0021 | 75  | 91  | 0 | 109.56 | 36 |
| 2382.2627 | 3 | 2382.2656 | -0.0029 | 92  | 113 | 0 | 39.84  | 35 |
| 960.5284  | 2 | 960.528   | 0.0004  | 94  | 102 | 0 | 43.9   | 37 |
| 1059.5967 | 2 | 1059.5964 | 0.0003  | 77  | 85  | 0 | 43.41  | 36 |
| 1217.6153 | 2 | 1217.6153 | 0       | 147 | 157 | 0 | 46.6   | 38 |
| 1239.6244 | 2 | 1239.6248 | -0.0004 | 206 | 215 | 0 | 71.37  | 37 |
| 1402.7089 | 2 | 1402.7126 | -0.0037 | 324 | 336 | 0 | 76.68  | 37 |
| 1716.8861 | 2 | 1716.8869 | -0.0007 | 113 | 126 | 0 | 108.23 | 37 |
| 1927.9861 | 2 | 1927.9859 | 0.0002  | 292 | 310 | 0 | 62.28  | 37 |
| 3616.783  | 3 | 3615.7879 | 0.9951  | 44  | 76  | 0 | 70.68  | 36 |
| 1235.6125 | 2 | 1235.6146 | -0.002  | 16  | 26  | 1 | 39.04  | 38 |
| 1368.6243 | 2 | 1368.6245 | -0.0002 | 220 | 230 | 0 | 39.7   | 35 |
| 1548.8515 | 2 | 1548.8512 | 0.0003  | 105 | 119 | 0 | 112.12 | 34 |
| 1613.9054 | 2 | 1613.9062 | -0.0008 | 428 | 441 | 0 | 95.4   | 33 |
| 1668.8224 | 2 | 1668.822  | 0.0004  | 176 | 191 | 0 | 83.56  | 37 |
| 2006.2034 | 3 | 2006.204  | -0.0007 | 289 | 306 | 0 | 55.59  | 22 |
| 2603.3663 | 4 | 2603.3676 | -0.0013 | 192 | 214 | 1 | 42.71  | 35 |
| 754.4334  | 2 | 754.4337  | -0.0003 | 405 | 411 | 0 | 45.22  | 31 |
| 1025.5866 | 2 | 1025.5869 | -0.0003 | 424 | 433 | 0 | 40.07  | 32 |
| 1249.6298 | 2 | 1249.6302 | -0.0004 | 277 | 287 | 0 | 73.26  | 38 |
| 1329.7502 | 2 | 1329.7504 | -0.0002 | 448 | 459 | 0 | 69.66  | 35 |
| 1840.9213 | 3 | 1840.922  | -0.0007 | 288 | 302 | 1 | 44.4   | 37 |
| 2307.153  | 2 | 2307.1495 | 0.0035  | 672 | 693 | 0 | 143.47 | 38 |
| 1101.5828 | 2 | 1101.5818 | 0.001   | 356 | 364 | 0 | 50.83  | 38 |
| 1161.5231 | 2 | 1161.5237 | -0.0006 | 204 | 212 | 0 | 45.07  | 34 |
| 1403.652  | 2 | 1403.6528 | -0.0008 | 441 | 453 | 0 | 86.68  | 35 |

|           |   |           |         |      |      |   |        |    |
|-----------|---|-----------|---------|------|------|---|--------|----|
| 1411.7404 | 2 | 1411.7419 | -0.0016 | 467  | 480  | 0 | 90.02  | 36 |
| 2037.9384 | 2 | 2037.9426 | -0.0041 | 365  | 383  | 0 | 109.85 | 36 |
| 2223.1746 | 3 | 2222.1736 | 1.0011  | 96   | 115  | 0 | 63.68  | 35 |
| 975.4409  | 2 | 975.441   | -0.0001 | 21   | 30   | 0 | 63.16  | 33 |
| 1131.5231 | 2 | 1131.5197 | 0.0035  | 199  | 208  | 0 | 37.44  | 34 |
| 1143.5534 | 2 | 1143.5529 | 0.0005  | 42   | 52   | 0 | 67.35  | 35 |
| 1197.6975 | 2 | 1197.6982 | -0.0007 | 31   | 41   | 1 | 49.12  | 33 |
| 1789.8806 | 2 | 1789.8846 | -0.004  | 241  | 256  | 0 | 68.41  | 38 |
| 3150.6316 | 3 | 3150.635  | -0.0034 | 150  | 179  | 0 | 96.21  | 34 |
| 747.4274  | 2 | 747.4279  | -0.0005 | 363  | 368  | 0 | 43.7   | 36 |
| 881.4084  | 2 | 881.4065  | 0.0019  | 226  | 232  | 0 | 49.59  | 34 |
| 1356.6167 | 2 | 1356.6166 | 0.0002  | 380  | 391  | 0 | 52.1   | 35 |
| 1406.6063 | 2 | 1406.6063 | 0.0001  | 278  | 290  | 0 | 82.32  | 32 |
| 1736.8408 | 2 | 1736.8403 | 0.0005  | 291  | 305  | 0 | 122.02 | 37 |
| 1034.5476 | 2 | 1034.5509 | -0.0033 | 413  | 423  | 0 | 54.71  | 37 |
| 1204.5464 | 2 | 1204.5473 | -0.0009 | 981  | 991  | 0 | 44.61  | 35 |
| 1370.7921 | 2 | 1370.7922 | -0.0001 | 483  | 494  | 0 | 55.55  | 33 |
| 1471.8015 | 2 | 1471.8035 | -0.002  | 967  | 980  | 0 | 51.9   | 36 |
| 1543.7832 | 2 | 1543.7842 | -0.001  | 1120 | 1133 | 0 | 81.36  | 37 |
| 1617.8407 | 2 | 1617.8403 | 0.0004  | 992  | 1006 | 0 | 73.84  | 37 |
| 1798.815  | 2 | 1798.8156 | -0.0006 | 919  | 936  | 0 | 107.6  | 35 |
| 2774.4789 | 4 | 2773.4762 | 1.0027  | 750  | 775  | 0 | 44.51  | 33 |
| 1108.533  | 2 | 1108.5335 | -0.0005 | 456  | 464  | 0 | 40.69  | 37 |
| 1147.588  | 2 | 1147.5873 | 0.0007  | 468  | 477  | 0 | 43.76  | 38 |
| 1242.6921 | 2 | 1242.6932 | -0.001  | 772  | 783  | 0 | 70.9   | 37 |
| 1278.6388 | 2 | 1278.639  | -0.0003 | 686  | 697  | 0 | 69.77  | 38 |
| 1542.8303 | 3 | 1542.8307 | -0.0004 | 186  | 198  | 0 | 42.67  | 37 |
| 1748.9766 | 3 | 1748.9785 | -0.0019 | 755  | 771  | 0 | 36.66  | 32 |
| 2044.0952 | 2 | 2044.0953 | 0       | 707  | 724  | 0 | 107.52 | 35 |
| 2901.5058 | 3 | 2900.5027 | 1.003   | 375  | 401  | 0 | 46.03  | 34 |
| 3112.6362 | 4 | 3112.6379 | -0.0017 | 159  | 185  | 1 | 34.83  | 33 |
| 1232.6184 | 2 | 1232.6183 | 0.0001  | 623  | 633  | 0 | 53.6   | 38 |
| 1276.6636 | 2 | 1276.6663 | -0.0028 | 318  | 330  | 0 | 69.34  | 38 |
| 1280.6168 | 2 | 1280.6183 | -0.0015 | 331  | 341  | 0 | 48.46  | 37 |
| 1363.6727 | 2 | 1363.6732 | -0.0005 | 1007 | 1019 | 0 | 81.48  | 38 |
| 1410.7333 | 2 | 1410.7354 | -0.0022 | 54   | 66   | 0 | 43.03  | 36 |
| 1554.8615 | 2 | 1554.8617 | -0.0002 | 763  | 777  | 0 | 95.9   | 34 |
| 2488.3166 | 3 | 2488.3173 | -0.0008 | 385  | 407  | 0 | 76.6   | 35 |
| 1042.5763 | 2 | 1042.5771 | -0.0008 | 104  | 113  | 0 | 79.63  | 36 |
| 1181.7023 | 2 | 1181.702  | 0.0004  | 78   | 89   | 0 | 67.81  | 30 |
| 1198.6549 | 2 | 1198.6557 | -0.0009 | 286  | 296  | 0 | 79.88  | 34 |
| 1279.7608 | 2 | 1279.7612 | -0.0004 | 161  | 173  | 0 | 60.89  | 28 |
| 1699.8914 | 2 | 1699.8927 | -0.0013 | 459  | 475  | 0 | 100.39 | 37 |
| 2568.4052 | 3 | 2568.405  | 0.0002  | 297  | 320  | 0 | 53.22  | 31 |
| 1192.6548 | 2 | 1192.6564 | -0.0016 | 138  | 147  | 0 | 65.85  | 35 |
| 1216.5968 | 2 | 1216.5989 | -0.0021 | 321  | 330  | 0 | 53.94  | 36 |
| 1422.6565 | 2 | 1422.6568 | -0.0002 | 183  | 193  | 0 | 60.2   | 36 |
| 1468.7981 | 2 | 1468.7998 | -0.0017 | 102  | 116  | 0 | 82.68  | 35 |
| 2235.1364 | 2 | 2235.1358 | 0.0007  | 118  | 137  | 0 | 72.85  | 37 |
| 2260.071  | 2 | 2260.0707 | 0.0004  | 346  | 367  | 0 | 97.42  | 37 |
| 991.4837  | 2 | 991.4831  | 0.0006  | 185  | 192  | 0 | 41.32  | 38 |
| 1058.5349 | 2 | 1058.5356 | -0.0007 | 338  | 347  | 0 | 40.77  | 37 |
| 1932.9266 | 2 | 1932.9285 | -0.0019 | 268  | 285  | 0 | 89.31  | 37 |
| 2201.089  | 2 | 2201.0892 | -0.0002 | 314  | 332  | 0 | 84.45  | 37 |
| 3356.5792 | 3 | 3356.5772 | 0.002   | 193  | 222  | 0 | 64.1   | 35 |
| 1089.5312 | 2 | 1089.5414 | -0.0102 | 313  | 323  | 0 | 48.47  | 37 |
| 1542.7586 | 2 | 1542.7606 | -0.002  | 356  | 368  | 0 | 61.43  | 37 |
| 1682.9459 | 2 | 1682.9454 | 0.0005  | 133  | 147  | 0 | 102.62 | 32 |

|           |   |           |         |      |      |   |        |    |
|-----------|---|-----------|---------|------|------|---|--------|----|
| 2322.2796 | 3 | 2322.2795 | 0.0002  | 133  | 153  | 1 | 92.37  | 31 |
| 1365.7359 | 2 | 1365.7365 | -0.0006 | 368  | 380  | 0 | 49.1   | 35 |
| 1406.7047 | 2 | 1406.7042 | 0.0006  | 1145 | 1156 | 0 | 60.22  | 38 |
| 1434.7346 | 2 | 1434.7354 | -0.0008 | 1132 | 1144 | 0 | 90.14  | 38 |
| 1475.7721 | 2 | 1475.7732 | -0.0011 | 151  | 163  | 0 | 63.15  | 38 |
| 2023.971  | 3 | 2023.9707 | 0.0003  | 1308 | 1325 | 0 | 45.39  | 37 |
| 2057.0654 | 2 | 2057.0656 | -0.0001 | 520  | 536  | 0 | 48.81  | 36 |
| 2661.4351 | 3 | 2660.4326 | 1.0024  | 414  | 437  | 0 | 79.19  | 32 |
| 974.5547  | 2 | 974.5549  | -0.0002 | 227  | 237  | 0 | 44.21  | 36 |
| 1277.6274 | 2 | 1277.6286 | -0.0011 | 135  | 146  | 0 | 40.52  | 38 |
| 1392.8082 | 2 | 1392.8089 | -0.0007 | 150  | 163  | 0 | 32.75  | 28 |
| 1424.7669 | 2 | 1424.7664 | 0.0005  | 309  | 321  | 0 | 46.54  | 35 |
| 1456.8327 | 2 | 1456.8323 | 0.0004  | 238  | 250  | 0 | 95.47  | 33 |
| 1491.7671 | 2 | 1491.7681 | -0.001  | 338  | 351  | 0 | 81.19  | 38 |
| 1863.936  | 2 | 1863.9367 | -0.0007 | 322  | 337  | 0 | 74.15  | 38 |
| 3149.7319 | 3 | 3149.7336 | -0.0017 | 194  | 223  | 1 | 38.62  | 29 |
| 1022.5829 | 2 | 1022.5834 | -0.0006 | 26   | 34   | 0 | 50.47  | 32 |
| 2084.0602 | 2 | 2084.0572 | 0.0031  | 56   | 75   | 0 | 118.65 | 37 |
| 1209.6718 | 2 | 1209.6717 | 0.0001  | 5    | 15   | 0 | 34.99  | 33 |
| 1738.999  | 2 | 1738.9981 | 0.0008  | 437  | 453  | 0 | 90.65  | 30 |
| 2276.3078 | 2 | 2276.3104 | -0.0025 | 506  | 526  | 0 | 98.2   | 26 |
| 2619.3938 | 3 | 2619.3942 | -0.0004 | 161  | 183  | 1 | 60.26  | 34 |
| 975.4409  | 2 | 975.441   | -0.0001 | 21   | 30   | 0 | 63.16  | 33 |
| 1175.5282 | 2 | 1175.5281 | 0.0001  | 199  | 208  | 0 | 48.59  | 34 |
| 1773.8873 | 2 | 1773.8897 | -0.0024 | 241  | 256  | 0 | 98.46  | 38 |
| 1967.073  | 3 | 1967.0727 | 0.0003  | 98   | 115  | 0 | 36.05  | 33 |
| 3150.6331 | 3 | 3150.635  | -0.0019 | 150  | 179  | 0 | 79.25  | 34 |
| 997.5545  | 2 | 997.5556  | -0.0011 | 140  | 148  | 0 | 57.41  | 33 |
| 1192.6103 | 3 | 1192.6102 | 0.0001  | 48   | 58   | 0 | 42.53  | 38 |
| 1402.7935 | 2 | 1402.7932 | 0.0003  | 150  | 162  | 0 | 84.31  | 34 |
| 1558.8939 | 3 | 1558.8943 | -0.0005 | 149  | 162  | 1 | 38.97  | 31 |
| 1630.8234 | 2 | 1630.8236 | -0.0001 | 171  | 185  | 0 | 109.76 | 38 |
| 1365.7359 | 2 | 1365.7365 | -0.0006 | 368  | 380  | 0 | 49.1   | 35 |
| 1434.7346 | 2 | 1434.7354 | -0.0008 | 1132 | 1144 | 0 | 90.14  | 38 |
| 1475.7721 | 2 | 1475.7732 | -0.0011 | 151  | 163  | 0 | 63.15  | 38 |
| 2023.971  | 3 | 2023.9707 | 0.0003  | 1308 | 1325 | 0 | 45.39  | 37 |
| 2039.1096 | 2 | 2039.1092 | 0.0005  | 520  | 536  | 0 | 57.45  | 34 |
| 2661.4351 | 3 | 2660.4326 | 1.0024  | 414  | 437  | 0 | 79.19  | 32 |
| 1673.8924 | 2 | 1673.893  | -0.0006 | 21   | 33   | 0 | 72.36  | 37 |
| 1819.8024 | 3 | 1819.8047 | -0.0023 | 64   | 78   | 0 | 44.94  | 34 |
| 2481.334  | 2 | 2480.3274 | 1.0066  | 88   | 110  | 0 | 101.26 | 33 |
| 1042.5763 | 2 | 1042.5771 | -0.0008 | 100  | 109  | 0 | 79.63  | 36 |
| 1181.7023 | 2 | 1181.702  | 0.0004  | 74   | 85   | 0 | 67.81  | 30 |
| 1228.6913 | 2 | 1228.6914 | -0.0001 | 282  | 292  | 0 | 70.48  | 36 |
| 1279.7608 | 2 | 1279.7612 | -0.0004 | 157  | 169  | 0 | 60.89  | 28 |
| 1699.8914 | 2 | 1699.8927 | -0.0013 | 455  | 471  | 0 | 100.39 | 37 |
| 985.5526  | 2 | 985.5556  | -0.0031 | 125  | 133  | 0 | 49.31  | 36 |
| 1016.601  | 2 | 1016.6019 | -0.0008 | 442  | 450  | 0 | 56.13  | 34 |
| 1181.6141 | 2 | 1181.6153 | -0.0011 | 798  | 808  | 0 | 40.35  | 36 |
| 1334.6392 | 2 | 1334.6401 | -0.0009 | 270  | 282  | 0 | 90.42  | 37 |
| 1921.948  | 2 | 1921.9489 | -0.0009 | 838  | 856  | 0 | 112.66 | 38 |
| 916.574   | 2 | 916.5746  | -0.0006 | 371  | 378  | 0 | 31.23  | 26 |
| 950.4817  | 2 | 950.4821  | -0.0004 | 246  | 254  | 0 | 41.02  | 38 |
| 1227.6133 | 2 | 1227.6136 | -0.0003 | 330  | 340  | 0 | 52.33  | 36 |
| 1359.7054 | 2 | 1359.7068 | -0.0013 | 110  | 120  | 0 | 62.16  | 38 |
| 1401.7365 | 3 | 1401.7365 | 0       | 138  | 149  | 1 | 47.48  | 38 |
| 2048.969  | 2 | 2048.97   | -0.0009 | 80   | 99   | 0 | 83.84  | 37 |
| 2090.1975 | 3 | 2089.1936 | 1.004   | 358  | 378  | 1 | 51.1   | 28 |

|           |   |           |         |      |      |   |        |    |
|-----------|---|-----------|---------|------|------|---|--------|----|
| 1294.833  | 2 | 1294.8336 | -0.0006 | 618  | 629  | 0 | 87.01  | 20 |
| 1942.0885 | 3 | 1942.0887 | -0.0002 | 225  | 241  | 1 | 55.95  | 32 |
| 2028.127  | 2 | 2028.1255 | 0.0015  | 839  | 856  | 0 | 41.04  | 32 |
| 2067.1311 | 3 | 2066.1313 | 0.9998  | 947  | 965  | 0 | 35.73  | 33 |
| 2073.12   | 2 | 2073.1218 | -0.0018 | 694  | 713  | 0 | 127.49 | 34 |
| 1002.4882 | 2 | 1002.4883 | -0.0001 | 972  | 980  | 0 | 50.49  | 37 |
| 1080.6289 | 2 | 1080.6291 | -0.0002 | 1022 | 1032 | 0 | 35.71  | 32 |
| 1109.4983 | 2 | 1109.4989 | -0.0006 | 690  | 699  | 0 | 57.22  | 35 |
| 1324.6629 | 2 | 1324.6623 | 0.0006  | 1041 | 1052 | 0 | 68.24  | 37 |
| 1346.665  | 2 | 1346.6678 | -0.0027 | 708  | 719  | 0 | 74.16  | 37 |
| 1394.6913 | 2 | 1394.6929 | -0.0016 | 1096 | 1108 | 0 | 44.6   | 37 |
| 1640.7496 | 2 | 1640.7503 | -0.0006 | 771  | 784  | 1 | 49.2   | 35 |
| 1792.9923 | 2 | 1792.9935 | -0.0011 | 176  | 191  | 0 | 50.1   | 32 |
| 2687.4641 | 3 | 2687.4646 | -0.0005 | 466  | 490  | 1 | 50.28  | 30 |
| 1176.6138 | 2 | 1176.6139 | 0       | 812  | 821  | 0 | 70.82  | 38 |
| 1483.9017 | 2 | 1483.9014 | 0.0003  | 433  | 446  | 0 | 51.77  | 25 |
| 1622.8322 | 2 | 1622.8304 | 0.0018  | 570  | 583  | 0 | 62.3   | 37 |
| 1975.9391 | 2 | 1975.9374 | 0.0017  | 84   | 100  | 0 | 116.98 | 37 |
| 2014.0283 | 3 | 2014.0306 | -0.0023 | 540  | 556  | 1 | 38.98  | 37 |
| 758.4651  | 2 | 758.465   | 0       | 291  | 297  | 0 | 47.11  | 35 |
| 1102.597  | 2 | 1102.5983 | -0.0012 | 848  | 857  | 0 | 41.09  | 38 |
| 1550.7856 | 2 | 1550.7875 | -0.0019 | 117  | 132  | 0 | 51.43  | 37 |
| 2097.1062 | 3 | 2097.1066 | -0.0004 | 731  | 749  | 1 | 77.41  | 36 |
| 2162.1104 | 2 | 2162.1106 | -0.0002 | 198  | 216  | 0 | 60.86  | 36 |
| 2579.2994 | 2 | 2579.3006 | -0.0012 | 152  | 173  | 0 | 97.88  | 37 |
| 1378.707  | 2 | 1378.7092 | -0.0022 | 376  | 389  | 0 | 80.04  | 38 |
| 1545.7815 | 2 | 1545.7821 | -0.0006 | 319  | 332  | 0 | 110.86 | 38 |
| 2156.983  | 2 | 2156.9862 | -0.0032 | 356  | 375  | 0 | 88.33  | 35 |
| 915.5542  | 2 | 915.5542  | 0       | 183  | 190  | 0 | 36.75  | 35 |
| 927.5391  | 2 | 927.5389  | 0.0002  | 239  | 246  | 0 | 38.42  | 33 |
| 961.523   | 2 | 961.5233  | -0.0003 | 588  | 595  | 0 | 64.02  | 38 |
| 1054.5773 | 2 | 1054.5771 | 0.0002  | 228  | 238  | 0 | 35.67  | 34 |
| 1256.6394 | 2 | 1256.6401 | -0.0007 | 569  | 579  | 0 | 50.27  | 36 |
| 1335.7651 | 2 | 1335.765  | 0.0001  | 339  | 350  | 0 | 81.26  | 30 |
| 1528.8138 | 2 | 1528.8137 | 0.0001  | 596  | 609  | 0 | 45.84  | 37 |
| 2153.0869 | 3 | 2153.0865 | 0.0004  | 519  | 540  | 0 | 56.5   | 37 |
| 4049.9657 | 4 | 4049.9681 | -0.0024 | 468  | 505  | 0 | 67.84  | 35 |
| 949.5229  | 2 | 949.5233  | -0.0003 | 406  | 413  | 0 | 38.47  | 35 |
| 1458.7683 | 2 | 1458.7752 | -0.0069 | 96   | 108  | 0 | 56.22  | 37 |
| 1960.9658 | 2 | 1960.9676 | -0.0018 | 318  | 333  | 0 | 133.65 | 38 |
| 2095.1659 | 4 | 2095.1677 | -0.0019 | 341  | 359  | 0 | 58.25  | 31 |
| 1055.5978 | 2 | 1055.5975 | 0.0004  | 188  | 197  | 0 | 46.81  | 33 |
| 1125.512  | 2 | 1125.5124 | -0.0004 | 129  | 138  | 0 | 75.72  | 35 |
| 1739.9569 | 2 | 1739.957  | -0.0001 | 320  | 336  | 0 | 105.27 | 34 |
| 2708.2953 | 3 | 2708.2963 | -0.001  | 93   | 118  | 0 | 81.47  | 37 |
| 1604.8402 | 2 | 1604.841  | -0.0008 | 603  | 616  | 0 | 94.79  | 37 |
| 1770.0242 | 2 | 1770.0251 | -0.0009 | 296  | 312  | 0 | 69.41  | 29 |
| 1924.0185 | 2 | 1924.0193 | -0.0008 | 221  | 236  | 0 | 89.14  | 35 |
| 1157.6441 | 2 | 1157.6445 | -0.0004 | 191  | 202  | 0 | 39.64  | 37 |
| 1270.6777 | 2 | 1270.6782 | -0.0005 | 208  | 219  | 0 | 50.33  | 36 |
| 1419.8193 | 3 | 1419.8198 | -0.0004 | 112  | 124  | 1 | 47.55  | 30 |
| 2028.0526 | 2 | 2028.0527 | -0.0001 | 246  | 264  | 0 | 119.47 | 36 |
| 2141.0147 | 3 | 2141.0164 | -0.0017 | 40   | 56   | 1 | 42.27  | 37 |
| 2340.2611 | 3 | 2340.2689 | -0.0078 | 243  | 264  | 1 | 54.67  | 34 |
| 1240.5684 | 2 | 1240.5659 | 0.0025  | 361  | 371  | 0 | 35.94  | 35 |
| 2279.1526 | 2 | 2279.1533 | -0.0006 | 88   | 109  | 0 | 154.35 | 37 |
| 3134.5471 | 3 | 3134.5442 | 0.0029  | 325  | 354  | 0 | 65.26  | 36 |
| 1072.5603 | 2 | 1072.5625 | -0.0022 | 99   | 108  | 0 | 39.79  | 38 |

|           |   |           |         |     |     |   |        |    |
|-----------|---|-----------|---------|-----|-----|---|--------|----|
| 1157.6045 | 2 | 1157.604  | 0.0005  | 313 | 322 | 0 | 59.18  | 36 |
| 1298.7554 | 2 | 1298.7558 | -0.0004 | 284 | 295 | 0 | 107.82 | 33 |
| 2203.1801 | 3 | 2202.1757 | 1.0044  | 52  | 73  | 0 | 74.01  | 35 |
| 1182.5923 | 2 | 1182.5921 | 0.0003  | 747 | 756 | 0 | 45.65  | 36 |
| 1196.5824 | 2 | 1196.5826 | -0.0001 | 138 | 148 | 0 | 78.82  | 37 |
| 1309.6382 | 3 | 1309.6375 | 0.0007  | 163 | 174 | 0 | 42.92  | 37 |
| 2206.0268 | 2 | 2206.0324 | -0.0056 | 245 | 263 | 0 | 93.48  | 36 |
| 2326.1875 | 3 | 2326.1879 | -0.0004 | 531 | 550 | 0 | 37.4   | 37 |
| 2406.2446 | 2 | 2406.2471 | -0.0025 | 75  | 97  | 0 | 49.34  | 36 |
| 1242.6563 | 2 | 1242.6568 | -0.0005 | 426 | 435 | 0 | 40.02  | 36 |
| 1382.6864 | 2 | 1382.6864 | 0       | 626 | 638 | 0 | 84.45  | 37 |
| 2216.3035 | 3 | 2216.3031 | 0.0004  | 378 | 398 | 0 | 43.79  | 23 |
| 2302.1838 | 2 | 2302.1845 | -0.0007 | 399 | 420 | 0 | 117.74 | 36 |
| 2362.2586 | 2 | 2362.2607 | -0.002  | 86  | 106 | 0 | 53.08  | 34 |
| 2561.3913 | 3 | 2561.3927 | -0.0015 | 84  | 106 | 1 | 75.03  | 32 |
| 2806.3535 | 3 | 2805.3545 | 0.999   | 45  | 69  | 0 | 54.79  | 37 |
| 975.5513  | 2 | 975.5502  | 0.0011  | 250 | 258 | 0 | 48.8   | 36 |
| 1029.5822 | 2 | 1029.5818 | 0.0004  | 57  | 66  | 0 | 45.91  | 37 |
| 1381.6828 | 2 | 1381.6838 | -0.001  | 164 | 176 | 0 | 86.39  | 38 |
| 1658.9166 | 3 | 1657.9151 | 1.0014  | 57  | 71  | 1 | 56.17  | 34 |
| 1686.9343 | 2 | 1686.9345 | -0.0002 | 420 | 434 | 0 | 45.45  | 34 |
| 856.4554  | 2 | 856.4555  | -0.0002 | 61  | 68  | 0 | 40.71  | 34 |
| 959.5804  | 2 | 959.5804  | 0       | 711 | 718 | 0 | 44.81  | 32 |
| 1005.5605 | 2 | 1005.5607 | -0.0002 | 927 | 935 | 0 | 42.89  | 36 |
| 1035.5506 | 2 | 1035.5502 | 0.0004  | 771 | 779 | 0 | 54.82  | 37 |
| 1485.8399 | 2 | 1485.8402 | -0.0003 | 109 | 122 | 0 | 84.97  | 34 |
| 1746.8889 | 2 | 1746.89   | -0.0011 | 32  | 48  | 0 | 95.3   | 38 |
| 713.4429  | 2 | 713.4435  | -0.0007 | 430 | 435 | 0 | 44.42  | 30 |
| 1255.6881 | 2 | 1255.6884 | -0.0003 | 88  | 99  | 0 | 46.83  | 35 |
| 1290.6352 | 2 | 1290.6303 | 0.0049  | 34  | 45  | 0 | 49.8   | 38 |
| 1319.6519 | 2 | 1319.651  | 0.0009  | 299 | 309 | 0 | 45.95  | 38 |
| 1526.7936 | 2 | 1526.794  | -0.0004 | 358 | 371 | 0 | 106.65 | 36 |
| 1582.7823 | 3 | 1582.7839 | -0.0015 | 441 | 454 | 1 | 56.92  | 37 |
| 1064.5906 | 2 | 1064.5906 | -0.0001 | 15  | 23  | 0 | 41.84  | 34 |
| 3020.2786 | 3 | 3020.2785 | 0.0001  | 81  | 111 | 0 | 75.59  | 29 |
| 3431.7198 | 4 | 3431.7184 | 0.0014  | 268 | 297 | 1 | 64.88  | 36 |
| 1614.8385 | 2 | 1614.8399 | -0.0014 | 26  | 40  | 0 | 75.85  | 37 |
| 1760.8772 | 2 | 1759.8774 | 0.9997  | 41  | 57  | 0 | 99.41  | 38 |
| 1614.8976 | 2 | 1614.8981 | -0.0005 | 81  | 95  | 0 | 112.19 | 35 |
| 1865.1018 | 2 | 1865.1026 | -0.0008 | 852 | 869 | 0 | 59.99  | 23 |
| 2326.26   | 3 | 2326.2606 | -0.0006 | 284 | 304 | 0 | 73.47  | 33 |
| 1180.5716 | 2 | 1180.5724 | -0.0008 | 410 | 420 | 0 | 84.19  | 37 |
| 1291.5698 | 2 | 1291.5714 | -0.0016 | 399 | 409 | 0 | 55.13  | 33 |
| 1528.8074 | 2 | 1528.8079 | -0.0005 | 278 | 291 | 0 | 68.57  | 37 |
| 1535.9546 | 2 | 1535.9538 | 0.0008  | 559 | 572 | 0 | 60.93  | 20 |
| 2292.3456 | 3 | 2292.3457 | 0       | 559 | 579 | 1 | 27.64  | 22 |
| 1045.6131 | 2 | 1045.6131 | -0.0001 | 372 | 381 | 0 | 68.94  | 33 |
| 1555.7632 | 2 | 1555.763  | 0.0001  | 210 | 223 | 0 | 66.95  | 37 |
| 1854.0512 | 2 | 1854.0502 | 0.001   | 437 | 453 | 0 | 63.12  | 30 |
| 3201.6481 | 3 | 3201.6517 | -0.0037 | 405 | 436 | 0 | 77.9   | 35 |
| 1157.6409 | 2 | 1157.6405 | 0.0005  | 351 | 361 | 0 | 38.52  | 37 |
| 1248.6121 | 2 | 1248.6132 | -0.0011 | 135 | 146 | 0 | 84.92  | 38 |
| 1426.792  | 2 | 1426.7919 | 0.0001  | 260 | 272 | 0 | 88.04  | 35 |
| 1655.8988 | 2 | 1655.8995 | -0.0007 | 273 | 288 | 0 | 39.16  | 35 |
| 2443.3872 | 3 | 2443.3872 | -0.0001 | 7   | 29  | 0 | 66.36  | 27 |
| 1026.6078 | 2 | 1026.6073 | 0.0005  | 182 | 191 | 0 | 39.39  | 30 |
| 1056.6542 | 2 | 1056.6543 | -0.0001 | 282 | 291 | 0 | 49.46  | 29 |
| 1074.592  | 2 | 1074.5921 | 0       | 248 | 258 | 0 | 60.53  | 37 |

|           |   |           |         |     |     |   |        |    |
|-----------|---|-----------|---------|-----|-----|---|--------|----|
| 1127.5939 | 2 | 1127.5934 | 0.0005  | 265 | 275 | 0 | 68.79  | 35 |
| 1130.5558 | 2 | 1130.5567 | -0.0009 | 227 | 236 | 0 | 54.58  | 36 |
| 1209.6465 | 3 | 1209.6466 | 0       | 237 | 247 | 1 | 36.7   | 35 |
| 1523.7988 | 2 | 1523.7984 | 0.0005  | 303 | 316 | 0 | 74.75  | 37 |
| 995.6127  | 2 | 995.6127  | -0.0001 | 311 | 319 | 0 | 36.81  | 26 |
| 1003.5819 | 2 | 1003.5814 | 0.0005  | 471 | 479 | 0 | 64.4   | 34 |
| 1413.7195 | 2 | 1413.7212 | -0.0017 | 193 | 204 | 0 | 66.6   | 36 |
| 1880.9353 | 2 | 1880.9342 | 0.0011  | 445 | 460 | 0 | 112.04 | 37 |
| 1034.5476 | 2 | 1034.5509 | -0.0033 | 413 | 423 | 0 | 54.71  | 37 |
| 1204.5464 | 2 | 1204.5473 | -0.0009 | 980 | 990 | 0 | 44.61  | 35 |
| 1370.7921 | 2 | 1370.7922 | -0.0001 | 483 | 494 | 0 | 55.55  | 33 |
| 1638.8435 | 2 | 1638.8465 | -0.0029 | 776 | 791 | 0 | 42.69  | 37 |
| 1798.815  | 2 | 1798.8156 | -0.0006 | 918 | 935 | 0 | 107.6  | 35 |
| 1045.5981 | 2 | 1045.6019 | -0.0037 | 375 | 384 | 0 | 53.66  | 34 |
| 1189.6455 | 2 | 1189.6455 | 0       | 751 | 760 | 0 | 41.35  | 38 |
| 1459.7305 | 2 | 1459.7307 | -0.0002 | 697 | 709 | 0 | 58.99  | 38 |
| 1518.7825 | 2 | 1518.7831 | -0.0006 | 240 | 252 | 0 | 56.93  | 38 |
| 1848.8338 | 2 | 1848.8337 | 0       | 903 | 920 | 0 | 70.03  | 35 |
| 2004.9336 | 3 | 2004.9348 | -0.0013 | 903 | 921 | 1 | 40.09  | 36 |
| 2088.0474 | 3 | 2088.0487 | -0.0013 | 217 | 234 | 1 | 50.28  | 37 |
| 977.5183  | 2 | 977.5182  | 0.0001  | 37  | 44  | 0 | 46.67  | 36 |
| 1530.7167 | 2 | 1530.7161 | 0.0006  | 86  | 99  | 0 | 84.88  | 36 |
| 1681.8333 | 2 | 1681.8312 | 0.0021  | 320 | 334 | 0 | 66.01  | 37 |
| 3076.5394 | 3 | 3075.5256 | 1.0137  | 45  | 72  | 0 | 49.75  | 36 |
| 1015.5181 | 2 | 1015.5186 | -0.0005 | 50  | 59  | 0 | 38.47  | 36 |
| 1195.728  | 2 | 1195.7288 | -0.0008 | 469 | 479 | 0 | 60.89  | 28 |
| 1266.5687 | 2 | 1266.5696 | -0.001  | 137 | 148 | 0 | 76.17  | 35 |
| 1507.7583 | 2 | 1507.7592 | -0.0009 | 213 | 225 | 0 | 102.64 | 38 |
| 1356.8013 | 2 | 1356.8017 | -0.0004 | 157 | 169 | 0 | 53.43  | 30 |
| 1368.6243 | 2 | 1368.6245 | -0.0002 | 224 | 234 | 0 | 39.7   | 35 |
| 1526.892  | 2 | 1526.892  | 0.0001  | 432 | 445 | 0 | 86.45  | 30 |
| 1924.1724 | 3 | 1923.1669 | 1.0054  | 293 | 310 | 0 | 51.52  | 20 |
| 2994.4189 | 3 | 2993.4142 | 1.0047  | 254 | 280 | 0 | 41.85  | 36 |
| 1112.6441 | 2 | 1112.6441 | 0       | 821 | 831 | 0 | 106.81 | 33 |
| 1814.9358 | 2 | 1814.9342 | 0.0016  | 299 | 313 | 0 | 78.78  | 37 |
| 2134.9998 | 3 | 2134.0007 | 0.9991  | 241 | 257 | 0 | 46.88  | 36 |
| 842.4847  | 2 | 842.4862  | -0.0015 | 2   | 10  | 0 | 60.6   | 34 |
| 1180.6923 | 2 | 1180.6928 | -0.0005 | 129 | 139 | 0 | 90.73  | 30 |
| 1549.7561 | 2 | 1549.7559 | 0.0002  | 115 | 128 | 0 | 83.17  | 38 |
| 1097.5871 | 2 | 1097.5869 | 0.0002  | 225 | 233 | 1 | 39.83  | 34 |
| 1143.6573 | 2 | 1143.6573 | 0       | 282 | 291 | 0 | 61.26  | 35 |
| 1182.6249 | 2 | 1182.6244 | 0.0005  | 433 | 443 | 0 | 57.85  | 36 |
| 1259.6753 | 2 | 1259.6761 | -0.0008 | 468 | 478 | 0 | 60.29  | 37 |
| 1329.7077 | 2 | 1329.7075 | 0.0002  | 234 | 246 | 0 | 83.89  | 37 |
| 1053.5813 | 2 | 1053.5819 | -0.0006 | 100 | 109 | 0 | 34.94  | 34 |
| 1334.6832 | 2 | 1334.683  | 0.0002  | 524 | 535 | 0 | 82.57  | 38 |
| 1642.8357 | 2 | 1642.8355 | 0.0002  | 763 | 777 | 0 | 95.53  | 37 |
| 2723.4532 | 3 | 2722.4502 | 1.0031  | 812 | 839 | 0 | 45.2   | 33 |
| 1243.7745 | 2 | 1243.7751 | -0.0006 | 344 | 355 | 0 | 90.04  | 23 |
| 1293.7119 | 2 | 1293.7115 | 0.0004  | 401 | 411 | 0 | 43.07  | 34 |
| 1431.6756 | 2 | 1431.6742 | 0.0014  | 179 | 190 | 0 | 73.64  | 36 |
| 2349.3775 | 3 | 2349.3784 | -0.0009 | 289 | 309 | 1 | 39.61  | 23 |
| 1319.6221 | 3 | 1319.6218 | 0.0003  | 372 | 383 | 0 | 43.63  | 36 |
| 1554.7791 | 2 | 1554.7786 | 0.0006  | 21  | 35  | 0 | 95.38  | 37 |
| 1927.9412 | 3 | 1927.9422 | -0.001  | 384 | 400 | 0 | 47.13  | 37 |
| 2521.3752 | 3 | 2521.3751 | 0.0001  | 437 | 461 | 0 | 62.97  | 31 |
| 1852.0557 | 2 | 1852.0557 | 0       | 348 | 364 | 0 | 134.2  | 30 |
| 2008.1567 | 3 | 2008.1568 | -0.0002 | 347 | 364 | 1 | 54.65  | 27 |

|           |   |           |         |      |      |   |        |    |
|-----------|---|-----------|---------|------|------|---|--------|----|
| 1788.0299 | 2 | 1788.0284 | 0.0014  | 760  | 775  | 0 | 81.16  | 29 |
| 2312.3651 | 3 | 2311.3603 | 1.0049  | 935  | 954  | 0 | 50.51  | 23 |
| 948.5395  | 2 | 948.5392  | 0.0003  | 197  | 205  | 0 | 60.2   | 35 |
| 1059.5048 | 2 | 1059.5131 | -0.0082 | 160  | 169  | 0 | 55.1   | 35 |
| 1218.6492 | 2 | 1218.6496 | -0.0004 | 112  | 121  | 0 | 53.51  | 37 |
| 1407.7514 | 2 | 1407.7511 | 0.0003  | 95   | 106  | 0 | 82.26  | 36 |
| 1842.9423 | 2 | 1842.9435 | -0.0013 | 269  | 286  | 1 | 39.61  | 37 |
| 1340.7569 | 2 | 1340.7565 | 0.0005  | 511  | 523  | 0 | 89.46  | 34 |
| 1630.8664 | 2 | 1630.8679 | -0.0015 | 227  | 242  | 0 | 97.58  | 37 |
| 1939.0577 | 2 | 1939.0561 | 0.0016  | 278  | 296  | 0 | 78.4   | 34 |
| 2959.478  | 3 | 2958.4757 | 1.0023  | 120  | 147  | 0 | 71.93  | 36 |
| 881.4397  | 2 | 881.4396  | 0.0001  | 727  | 733  | 0 | 40.5   | 36 |
| 1228.5721 | 2 | 1228.5724 | -0.0004 | 499  | 509  | 0 | 63.61  | 35 |
| 1228.7176 | 2 | 1228.718  | -0.0003 | 593  | 603  | 0 | 59     | 34 |
| 1395.7244 | 2 | 1395.7245 | -0.0001 | 604  | 616  | 0 | 40.81  | 37 |
| 1983.0258 | 3 | 1982.0208 | 1.005   | 405  | 423  | 0 | 61.23  | 36 |
| 2896.4617 | 3 | 2896.4607 | 0.001   | 745  | 770  | 1 | 42.68  | 36 |
| 1818.893  | 2 | 1818.8921 | 0.0009  | 26   | 42   | 0 | 93.59  | 38 |
| 2409.2088 | 3 | 2409.2097 | -0.0009 | 26   | 47   | 1 | 40.8   | 37 |
| 1033.5226 | 2 | 1033.5226 | 0       | 344  | 352  | 0 | 59.47  | 38 |
| 1443.6485 | 2 | 1443.6491 | -0.0006 | 63   | 76   | 0 | 90.83  | 33 |
| 1861.0594 | 3 | 1861.0607 | -0.0013 | 127  | 145  | 0 | 47.12  | 29 |
| 1038.6072 | 2 | 1038.6073 | -0.0001 | 64   | 72   | 0 | 46.86  | 29 |
| 2652.3999 | 3 | 2651.3919 | 1.008   | 319  | 341  | 0 | 87.54  | 34 |
| 869.5333  | 2 | 869.5334  | -0.0001 | 236  | 243  | 0 | 51.76  | 30 |
| 1009.5919 | 2 | 1009.592  | -0.0001 | 417  | 425  | 0 | 31.86  | 29 |
| 1460.7607 | 2 | 1460.7623 | -0.0016 | 185  | 197  | 0 | 102.22 | 38 |
| 1578.8005 | 2 | 1578.8042 | -0.0037 | 133  | 146  | 0 | 44.56  | 38 |
| 1750.8853 | 2 | 1750.889  | -0.0037 | 244  | 259  | 0 | 48.49  | 37 |
| 1300.7018 | 2 | 1300.7027 | -0.0009 | 157  | 168  | 0 | 90.56  | 37 |
| 1306.641  | 2 | 1306.6418 | -0.0008 | 146  | 156  | 0 | 61.34  | 38 |
| 1372.6765 | 2 | 1372.6769 | -0.0004 | 133  | 144  | 0 | 72.3   | 37 |
| 1455.7672 | 2 | 1455.7722 | -0.0049 | 158  | 171  | 0 | 59.76  | 36 |
| 1547.7949 | 2 | 1547.7944 | 0.0006  | 94   | 108  | 0 | 72.57  | 38 |
| 1557.8726 | 2 | 1557.8726 | 0       | 342  | 356  | 0 | 80.66  | 34 |
| 1075.5075 | 2 | 1075.508  | -0.0005 | 160  | 169  | 0 | 59.89  | 37 |
| 1436.7542 | 2 | 1436.7525 | 0.0018  | 255  | 268  | 0 | 50.9   | 36 |
| 1464.773  | 2 | 1464.7725 | 0.0005  | 95   | 106  | 0 | 92.49  | 37 |
| 1608.7969 | 2 | 1608.7995 | -0.0026 | 216  | 231  | 0 | 46.25  | 38 |
| 856.4763  | 2 | 856.4766  | -0.0004 | 35   | 42   | 0 | 39.99  | 33 |
| 1042.556  | 2 | 1042.556  | 0.0001  | 668  | 676  | 0 | 49.56  | 36 |
| 1235.5793 | 2 | 1235.5782 | 0.0011  | 1039 | 1049 | 0 | 47.43  | 37 |
| 1340.6613 | 2 | 1340.6612 | 0       | 164  | 174  | 0 | 65.84  | 36 |
| 1670.9267 | 2 | 1670.9276 | -0.001  | 891  | 905  | 0 | 72.25  | 34 |
| 977.5311  | 2 | 977.5294  | 0.0017  | 520  | 527  | 0 | 39.01  | 37 |
| 1715.0035 | 2 | 1715.0022 | 0.0013  | 2116 | 2129 | 0 | 34.75  | 27 |
| 1778.9523 | 3 | 1778.9527 | -0.0004 | 856  | 871  | 0 | 48.52  | 35 |
| 1780.9998 | 2 | 1781.0047 | -0.0048 | 1464 | 1479 | 0 | 78.82  | 31 |
| 2408.297  | 3 | 2407.292  | 1.005   | 2201 | 2222 | 0 | 59.85  | 33 |
| 798.4967  | 2 | 798.4963  | 0.0004  | 134  | 140  | 0 | 33.31  | 31 |
| 1071.6441 | 2 | 1071.6441 | 0.0001  | 934  | 943  | 0 | 65.91  | 34 |
| 1227.6733 | 3 | 1227.6724 | 0.0009  | 411  | 422  | 0 | 43.29  | 36 |
| 1612.8563 | 2 | 1612.8573 | -0.001  | 646  | 659  | 0 | 74.96  | 36 |
| 1855.9528 | 3 | 1855.9541 | -0.0012 | 611  | 626  | 1 | 38.15  | 37 |
| 1578.7002 | 2 | 1578.6984 | 0.0018  | 1940 | 1952 | 0 | 46.8   | 34 |
| 1944.0317 | 2 | 1944.0316 | 0.0001  | 2070 | 2087 | 0 | 116.01 | 36 |
| 1180.7181 | 2 | 1180.718  | 0.0001  | 174  | 184  | 0 | 63.83  | 26 |
| 1232.6895 | 2 | 1232.6877 | 0.0018  | 397  | 408  | 0 | 57.84  | 35 |

|           |   |           |         |      |      |   |        |    |
|-----------|---|-----------|---------|------|------|---|--------|----|
| 1458.7602 | 2 | 1458.7678 | -0.0076 | 361  | 374  | 0 | 42.99  | 37 |
| 1881.0966 | 3 | 1881.0975 | -0.0009 | 147  | 164  | 0 | 43.47  | 27 |
| 1284.7695 | 2 | 1284.7693 | 0.0002  | 2912 | 2922 | 0 | 41.11  | 30 |
| 1550.9073 | 2 | 1550.9072 | 0.0001  | 1927 | 1940 | 0 | 127.93 | 28 |
| 1714.9035 | 3 | 1714.9036 | -0.0001 | 657  | 671  | 1 | 37.61  | 37 |
| 2355.1436 | 2 | 2355.1457 | -0.002  | 630  | 650  | 0 | 81.03  | 37 |
| 1267.6049 | 2 | 1267.6044 | 0.0004  | 51   | 61   | 0 | 40.53  | 37 |
| 1948.8579 | 2 | 1948.8578 | 0.0001  | 396  | 411  | 0 | 100.26 | 33 |
| 2219.1296 | 2 | 2219.1263 | 0.0034  | 365  | 382  | 0 | 68.09  | 37 |
| 1808.9859 | 3 | 1808.9859 | 0.0001  | 439  | 453  | 1 | 36.54  | 33 |
| 1871.9406 | 2 | 1871.9411 | -0.0005 | 675  | 692  | 0 | 98.1   | 37 |
| 4025.0233 | 3 | 4025.0269 | -0.0037 | 220  | 256  | 1 | 55.44  | 34 |
| 1757.9776 | 2 | 1757.9774 | 0.0002  | 73   | 88   | 0 | 95.74  | 34 |
| 1966.0012 | 3 | 1966.0021 | -0.0009 | 359  | 377  | 1 | 76.1   | 37 |
| 1138.707  | 2 | 1138.7074 | -0.0004 | 831  | 840  | 0 | 66.75  | 25 |
| 1414.7812 | 2 | 1414.782  | -0.0008 | 718  | 729  | 0 | 84.01  | 36 |
| 1957.9715 | 3 | 1956.9687 | 1.0028  | 81   | 98   | 0 | 47     | 37 |
| 980.5699  | 2 | 980.5695  | 0.0004  | 100  | 107  | 0 | 33.74  | 31 |
| 1762.8828 | 2 | 1762.8836 | -0.0008 | 12   | 27   | 0 | 97.03  | 38 |
| 2113.1518 | 3 | 2113.1531 | -0.0013 | 55   | 72   | 1 | 62.17  | 34 |
| 906.5495  | 3 | 906.5511  | -0.0017 | 351  | 357  | 1 | 26.86  | 25 |
| 961.5235  | 2 | 961.5233  | 0.0003  | 322  | 329  | 0 | 68.12  | 37 |
| 1038.6074 | 2 | 1038.6073 | 0.0001  | 290  | 298  | 0 | 32.15  | 29 |
| 1111.5304 | 2 | 1111.5298 | 0.0006  | 335  | 343  | 0 | 43.15  | 36 |
| 1548.8403 | 3 | 1548.8412 | -0.001  | 309  | 321  | 1 | 51.53  | 35 |
| 2028.9004 | 2 | 2028.9025 | -0.002  | 418  | 435  | 0 | 63.38  | 34 |
| 1256.7334 | 2 | 1256.734  | -0.0005 | 84   | 95   | 0 | 96.84  | 33 |
| 1383.7043 | 2 | 1383.7034 | 0.0009  | 26   | 37   | 0 | 69.13  | 36 |
| 1484.7447 | 2 | 1484.7471 | -0.0024 | 428  | 441  | 0 | 55.63  | 37 |
| 2005.9582 | 2 | 2005.9574 | 0.0008  | 277  | 292  | 0 | 69.71  | 37 |
| 2017.0332 | 2 | 2017.0368 | -0.0035 | 120  | 138  | 0 | 76.22  | 37 |
| 976.5085  | 2 | 976.509   | -0.0005 | 390  | 397  | 0 | 40.11  | 38 |
| 1228.7025 | 2 | 1228.7027 | -0.0002 | 609  | 619  | 0 | 79.6   | 35 |
| 1566.9344 | 2 | 1566.9345 | -0.0001 | 430  | 444  | 0 | 77.93  | 27 |
| 1036.5186 | 2 | 1036.5189 | -0.0003 | 110  | 118  | 0 | 56.35  | 37 |
| 1227.6733 | 3 | 1227.6724 | 0.0009  | 411  | 422  | 0 | 43.29  | 36 |
| 1612.8563 | 2 | 1612.8573 | -0.001  | 646  | 659  | 0 | 74.96  | 36 |
| 1855.9528 | 3 | 1855.9541 | -0.0012 | 611  | 626  | 1 | 38.15  | 37 |
| 897.4926  | 2 | 897.492   | 0.0007  | 24   | 31   | 0 | 55.89  | 33 |
| 1169.5962 | 2 | 1169.5968 | -0.0006 | 178  | 187  | 0 | 58.79  | 35 |
| 1581.8458 | 2 | 1581.8475 | -0.0016 | 75   | 89   | 0 | 75.02  | 35 |
| 2626.0509 | 3 | 2626.053  | -0.0021 | 42   | 65   | 0 | 58.14  | 26 |
| 2901.2141 | 3 | 2901.2164 | -0.0023 | 40   | 65   | 1 | 90.58  | 29 |
| 1266.7902 | 2 | 1266.7911 | -0.001  | 72   | 84   | 0 | 42.62  | 23 |
| 1686.7954 | 2 | 1686.7962 | -0.0008 | 101  | 115  | 0 | 93.18  | 37 |
| 1091.5977 | 2 | 1091.5975 | 0.0002  | 6    | 15   | 0 | 51.49  | 36 |
| 1660.893  | 3 | 1660.8937 | -0.0007 | 488  | 502  | 0 | 43.13  | 36 |
| 2166.1072 | 2 | 2165.0946 | 1.0127  | 856  | 872  | 0 | 87.82  | 37 |
| 3074.5585 | 3 | 3074.5594 | -0.0009 | 194  | 222  | 0 | 43.82  | 36 |
| 1187.655  | 2 | 1187.6584 | -0.0034 | 295  | 304  | 0 | 95.87  | 37 |
| 1746.8772 | 2 | 1746.8788 | -0.0016 | 386  | 401  | 0 | 61.43  | 38 |
| 1367.6732 | 2 | 1367.6755 | -0.0023 | 388  | 399  | 0 | 78.77  | 37 |
| 1410.8019 | 3 | 1410.8024 | -0.0005 | 409  | 419  | 1 | 40.52  | 33 |
| 1722.018  | 2 | 1722.0192 | -0.0012 | 91   | 105  | 0 | 48.67  | 26 |
| 3118.711  | 3 | 3118.71   | 0.001   | 617  | 644  | 0 | 44.18  | 29 |
| 797.5121  | 2 | 797.5123  | -0.0002 | 109  | 116  | 0 | 28.89  | 26 |
| 1287.6591 | 2 | 1287.6605 | -0.0014 | 95   | 106  | 0 | 74.65  | 37 |
| 1422.6586 | 2 | 1422.6627 | -0.0041 | 28   | 40   | 0 | 86.33  | 36 |

|           |   |           |         |      |      |   |       |    |
|-----------|---|-----------|---------|------|------|---|-------|----|
| 1933.0249 | 2 | 1933.023  | 0.0019  | 53   | 70   | 0 | 96.22 | 36 |
| 2089.0871 | 3 | 2089.0877 | -0.0007 | 110  | 127  | 1 | 65.09 | 37 |
| 2423.1601 | 3 | 2423.1618 | -0.0017 | 80   | 99   | 1 | 46.58 | 37 |
| 1048.5191 | 2 | 1048.5189 | 0.0002  | 314  | 322  | 0 | 45.16 | 38 |
| 1225.7024 | 2 | 1225.703  | -0.0006 | 469  | 480  | 0 | 98.74 | 32 |
| 1752.9573 | 2 | 1752.9563 | 0.001   | 363  | 378  | 0 | 38.76 | 33 |
| 1188.6342 | 2 | 1188.635  | -0.0008 | 182  | 194  | 0 | 74.18 | 38 |
| 1342.7081 | 2 | 1342.7092 | -0.0012 | 195  | 209  | 0 | 58.54 | 37 |
| 1351.6355 | 2 | 1351.6368 | -0.0013 | 331  | 342  | 0 | 55.66 | 37 |
| 1425.7568 | 2 | 1425.7576 | -0.0007 | 132  | 144  | 0 | 55.16 | 36 |
| 1759.8941 | 2 | 1759.8952 | -0.0011 | 9    | 25   | 0 | 97.79 | 37 |
| 1383.7706 | 2 | 1383.7722 | -0.0015 | 283  | 297  | 0 | 58.64 | 34 |
| 1775.9008 | 2 | 1774.8924 | 1.0085  | 355  | 370  | 0 | 95.34 | 38 |
| 1201.6808 | 2 | 1201.6819 | -0.0011 | 375  | 385  | 0 | 51.9  | 35 |
| 1534.9459 | 2 | 1534.9447 | 0.0013  | 810  | 823  | 0 | 80.83 | 20 |
| 2186.2129 | 3 | 2186.2133 | -0.0004 | 1687 | 1707 | 1 | 36.1  | 31 |
| 1190.5949 | 2 | 1190.5931 | 0.0018  | 177  | 187  | 0 | 47.85 | 38 |
| 1265.7346 | 2 | 1265.7343 | 0.0003  | 343  | 353  | 0 | 41.12 | 30 |
| 1512.8149 | 2 | 1512.8147 | 0.0002  | 259  | 272  | 0 | 97.32 | 36 |
| 1053.5551 | 2 | 1053.5567 | -0.0016 | 106  | 116  | 0 | 71.37 | 35 |
| 1156.6451 | 2 | 1156.6452 | -0.0001 | 11   | 21   | 0 | 42.7  | 36 |
| 1442.7237 | 2 | 1442.7253 | -0.0016 | 128  | 140  | 0 | 73.62 | 37 |
| 754.5064  | 2 | 754.5065  | -0.0001 | 102  | 107  | 0 | 46.59 | 20 |
| 773.5159  | 2 | 773.5163  | -0.0005 | 83   | 88   | 0 | 45.75 | 22 |
| 1570.8564 | 2 | 1570.8566 | -0.0002 | 161  | 175  | 0 | 67.33 | 35 |
| 1159.6712 | 2 | 1159.6713 | -0.0001 | 148  | 158  | 0 | 85.23 | 34 |
| 2924.5348 | 3 | 2924.5357 | -0.0009 | 321  | 348  | 0 | 59.06 | 34 |
| 1945.9501 | 2 | 1945.9495 | 0.0006  | 165  | 181  | 0 | 76.3  | 37 |
| 2187.2479 | 3 | 2187.2487 | -0.0009 | 97   | 115  | 1 | 64.84 | 27 |
| 1141.6821 | 2 | 1141.6819 | 0.0002  | 444  | 454  | 0 | 89.08 | 31 |
| 1832.8259 | 2 | 1832.8217 | 0.0042  | 221  | 236  | 0 | 50.06 | 35 |
| 1155.6974 | 2 | 1155.6975 | -0.0001 | 478  | 488  | 0 | 95.41 | 32 |
| 2182.1858 | 3 | 2182.1899 | -0.0041 | 380  | 398  | 1 | 41.1  | 33 |
| 1129.5719 | 2 | 1129.5728 | -0.0008 | 85   | 95   | 0 | 71.84 | 36 |
| 1255.6622 | 2 | 1255.6633 | -0.0011 | 123  | 136  | 0 | 46.74 | 35 |
| 2473.3034 | 2 | 2473.3064 | -0.003  | 278  | 300  | 0 | 51.28 | 35 |
| 1176.6138 | 2 | 1176.6139 | 0       | 510  | 519  | 0 | 70.82 | 38 |
| 1297.681  | 2 | 1297.6813 | -0.0002 | 207  | 218  | 0 | 47.74 | 35 |
| 1499.8964 | 2 | 1499.8963 | 0.0001  | 131  | 144  | 0 | 35.25 | 27 |
| 2014.0283 | 3 | 2014.0306 | -0.0023 | 238  | 254  | 1 | 38.98 | 37 |
| 1138.5723 | 2 | 1138.5731 | -0.0007 | 973  | 981  | 0 | 56.38 | 36 |
| 1872.8382 | 2 | 1872.8391 | -0.0009 | 582  | 597  | 0 | 63.38 | 34 |
| 1954.9657 | 3 | 1954.965  | 0.0008  | 982  | 997  | 0 | 48.72 | 37 |
| 1487.7083 | 2 | 1487.7104 | -0.0021 | 283  | 295  | 0 | 97.92 | 36 |
| 1958.9597 | 2 | 1958.9625 | -0.0028 | 172  | 188  | 0 | 42.19 | 37 |
| 1149.5975 | 2 | 1149.599  | -0.0014 | 127  | 137  | 0 | 84.43 | 37 |
| 1315.717  | 2 | 1315.7169 | 0.0001  | 411  | 421  | 0 | 58.75 | 37 |
| 1560.715  | 2 | 1560.7168 | -0.0018 | 168  | 181  | 0 | 69.11 | 35 |
| 1703.8822 | 2 | 1703.8842 | -0.002  | 79   | 93   | 0 | 68.15 | 37 |
| 1162.6202 | 2 | 1161.6142 | 1.006   | 161  | 171  | 0 | 55.42 | 37 |
| 1905.9945 | 2 | 1904.9918 | 1.0027  | 198  | 215  | 0 | 75.78 | 37 |
| 843.5218  | 2 | 843.5218  | 0       | 387  | 393  | 0 | 44.18 | 35 |
| 1087.5695 | 2 | 1087.5696 | 0       | 377  | 386  | 0 | 42.79 | 38 |
| 1241.6287 | 2 | 1241.6292 | -0.0005 | 412  | 422  | 0 | 60.25 | 36 |
| 2655.3619 | 3 | 2655.3656 | -0.0037 | 204  | 227  | 1 | 45.47 | 36 |
| 1031.6125 | 2 | 1031.6128 | -0.0003 | 482  | 490  | 0 | 51.34 | 32 |
| 2366.3832 | 2 | 2366.3824 | 0.0008  | 329  | 352  | 0 | 74.12 | 21 |
| 1024.5708 | 2 | 1024.5706 | 0.0003  | 303  | 310  | 0 | 34.02 | 33 |

|           |   |           |         |      |      |   |       |    |
|-----------|---|-----------|---------|------|------|---|-------|----|
| 1103.6085 | 2 | 1103.6087 | -0.0002 | 227  | 236  | 0 | 51.97 | 36 |
| 1151.5919 | 2 | 1151.5934 | -0.0016 | 130  | 140  | 0 | 79.95 | 37 |
| 1217.5875 | 2 | 1217.5888 | -0.0013 | 1502 | 1513 | 0 | 41.44 | 36 |
| 2119.1148 | 2 | 2119.1161 | -0.0013 | 1116 | 1135 | 0 | 92.25 | 36 |
| 1028.5984 | 2 | 1028.5978 | 0.0005  | 93   | 102  | 0 | 56.73 | 35 |
| 1214.6508 | 2 | 1214.6506 | 0.0001  | 390  | 400  | 0 | 80.13 | 37 |
| 1057.5766 | 2 | 1057.5768 | -0.0001 | 1865 | 1874 | 0 | 43.42 | 36 |
| 1120.6235 | 2 | 1120.624  | -0.0005 | 2101 | 2110 | 0 | 39.03 | 35 |
| 1796.8401 | 2 | 1796.8369 | 0.0032  | 1395 | 1408 | 0 | 43.26 | 36 |
| 2139.1576 | 3 | 2139.1576 | 0.0001  | 1496 | 1515 | 0 | 49.3  | 34 |
| 2183.0465 | 3 | 2183.0494 | -0.003  | 885  | 903  | 0 | 55.65 | 37 |
| 1044.4694 | 2 | 1044.4699 | -0.0005 | 208  | 216  | 0 | 44.23 | 32 |
| 1144.59   | 2 | 1144.591  | -0.001  | 134  | 142  | 0 | 73.2  | 37 |
| 2882.4282 | 2 | 2882.4284 | -0.0002 | 94   | 120  | 0 | 38.95 | 37 |
| 1324.6629 | 2 | 1324.6623 | 0.0006  | 1042 | 1053 | 0 | 68.24 | 37 |
| 1792.9923 | 2 | 1792.9935 | -0.0011 | 160  | 175  | 0 | 50.1  | 32 |
| 2230.2471 | 3 | 2230.2473 | -0.0002 | 453  | 473  | 0 | 32.27 | 30 |
| 1241.759  | 2 | 1241.7595 | -0.0005 | 1064 | 1075 | 0 | 79.22 | 28 |
| 1716.8701 | 2 | 1715.873  | 0.9971  | 600  | 615  | 0 | 48.77 | 38 |
| 1205.572  | 2 | 1205.5717 | 0.0003  | 434  | 443  | 0 | 56.15 | 37 |
| 1450.8869 | 3 | 1450.8871 | -0.0002 | 388  | 400  | 1 | 28.48 | 22 |
| 1522.669  | 2 | 1522.6689 | 0.0002  | 185  | 197  | 0 | 69.34 | 34 |
| 939.5755  | 2 | 939.5753  | 0.0002  | 125  | 132  | 0 | 58.14 | 28 |
| 2080.9272 | 3 | 2080.9273 | -0.0001 | 107  | 124  | 0 | 63.45 | 34 |
| 1009.5345 | 2 | 1009.5345 | 0       | 888  | 895  | 0 | 47    | 36 |
| 1012.6537 | 3 | 1012.6546 | -0.0009 | 401  | 408  | 1 | 31.62 | 26 |
| 1295.7553 | 2 | 1295.7561 | -0.0009 | 637  | 648  | 0 | 42.6  | 31 |
| 1730.9657 | 3 | 1729.9627 | 1.0029  | 194  | 207  | 1 | 62.27 | 33 |
| 1325.6989 | 2 | 1325.6979 | 0.001   | 371  | 381  | 0 | 55.2  | 35 |
| 1394.7621 | 2 | 1394.763  | -0.0009 | 232  | 244  | 0 | 70.63 | 34 |
| 1573.9489 | 2 | 1573.9483 | 0.0005  | 140  | 153  | 0 | 44.35 | 23 |
| 1652.9861 | 2 | 1652.9865 | -0.0004 | 435  | 448  | 0 | 61.08 | 25 |
| 1859.0916 | 3 | 1859.092  | -0.0004 | 140  | 155  | 1 | 35.3  | 24 |
| 1072.623  | 2 | 1072.6241 | -0.0011 | 42   | 52   | 0 | 60.45 | 36 |
| 1972.1254 | 3 | 1972.1258 | -0.0004 | 17   | 33   | 0 | 52.24 | 29 |
| 1388.6714 | 2 | 1387.6812 | 0.9901  | 240  | 250  | 0 | 51.76 | 36 |
| 1654.8424 | 2 | 1653.8363 | 1.0061  | 206  | 220  | 0 | 69.34 | 36 |
| 1597.8685 | 2 | 1597.8684 | 0.0002  | 90   | 102  | 0 | 56.48 | 35 |
| 2126.0438 | 3 | 2126.0433 | 0.0005  | 662  | 679  | 0 | 62.77 | 37 |
| 1410.8337 | 2 | 1410.8334 | 0.0003  | 153  | 165  | 0 | 41.54 | 28 |
| 3549.907  | 3 | 3549.9083 | -0.0014 | 116  | 149  | 0 | 71.6  | 30 |
| 1166.6033 | 2 | 1166.6044 | -0.001  | 319  | 328  | 0 | 51.53 | 37 |
| 1410.6253 | 2 | 1410.6263 | -0.0009 | 329  | 341  | 0 | 66.49 | 34 |
| 916.4444  | 2 | 916.4443  | 0.0001  | 490  | 496  | 0 | 46.78 | 35 |
| 1258.6519 | 2 | 1258.6517 | 0.0001  | 335  | 345  | 0 | 66.19 | 38 |
| 822.4387  | 2 | 822.4388  | -0.0001 | 730  | 736  | 0 | 39.33 | 36 |
| 1153.682  | 2 | 1153.6819 | 0.0001  | 442  | 451  | 0 | 67.88 | 31 |
| 1649.9967 | 2 | 1649.9967 | 0       | 21   | 35   | 0 | 30.48 | 22 |
| 1259.541  | 2 | 1259.5419 | -0.0008 | 304  | 315  | 0 | 46.81 | 31 |
| 1647.8022 | 3 | 1647.8045 | -0.0024 | 316  | 328  | 1 | 61.96 | 38 |
| 1720.9599 | 2 | 1720.9512 | 0.0087  | 738  | 752  | 0 | 69.43 | 32 |
| 756.4492  | 2 | 756.4494  | -0.0002 | 585  | 590  | 0 | 37.61 | 33 |
| 1225.6314 | 2 | 1225.6303 | 0.0011  | 378  | 389  | 0 | 41.85 | 36 |
| 1510.8334 | 3 | 1510.8355 | -0.0021 | 182  | 196  | 0 | 59.12 | 34 |
| 1094.5886 | 2 | 1094.5873 | 0.0013  | 32   | 40   | 0 | 49.27 | 36 |
| 2886.364  | 3 | 2886.3613 | 0.0027  | 456  | 482  | 0 | 59.02 | 37 |
| 1028.5604 | 2 | 1028.5614 | -0.001  | 855  | 863  | 0 | 41.42 | 37 |
| 1347.6811 | 2 | 1347.6823 | -0.0012 | 726  | 737  | 0 | 70.36 | 38 |

|            |           |             |           |           |         |          |           |           |
|------------|-----------|-------------|-----------|-----------|---------|----------|-----------|-----------|
| 1103.5395  | 2         | 1103.5393   | 0.0002    | 390       | 399     | 0        | 40.45     | 37        |
| 1247.635   | 2         | 1247.6366   | -0.0016   | 508       | 518     | 0        | 54.91     | 39        |
| 1343.6985  | 2         | 1343.698    | 0.0005    | 450       | 461     | 0        | 54.45     | 37        |
| 1444.6417  | 2         | 1444.6412   | 0.0006    | 177       | 187     | 0        | 43.54     | 33        |
| 1579.7547  | 2         | 1579.7552   | -0.0005   | 164       | 176     | 0        | 62.37     | 37        |
| 948.5644   | 2         | 948.5644    | 0         | 36        | 43      | 0        | 35.2      | 30        |
| 2004.9626  | 2         | 2004.9609   | 0.0018    | 16        | 35      | 0        | 70.42     | 37        |
| 1075.5608  | 2         | 1075.5622   | -0.0014   | 260       | 270     | 0        | 68.07     | 39        |
| 2859.496   | 3         | 2858.5079   | 0.9881    | 717       | 741     | 0        | 35.99     | 34        |
| 949.4806   | 2         | 949.4804    | 0.0003    | 85        | 92      | 0        | 45.09     | 38        |
| 1056.6292  | 2         | 1056.6292   | 0.0001    | 57        | 67      | 0        | 62.54     | 34        |
| 1235.6125  | 2         | 1235.6146   | -0.002    | 16        | 26      | 1        | 39.04     | 38        |
| 1368.6243  | 2         | 1368.6245   | -0.0002   | 223       | 233     | 0        | 39.7      | 35        |
| 1913.1466  | 3         | 1913.1462   | 0.0004    | 292       | 309     | 0        | 47.42     | 21        |
| 1159.6194  | 2         | 1159.6197   | -0.0003   | 50        | 61      | 0        | 67.99     | 38        |
| 1165.5993  | 2         | 1165.5979   | 0.0014    | 66        | 76      | 0        | 38.57     | 37        |
| 1368.6243  | 2         | 1368.6245   | -0.0002   | 227       | 237     | 0        | 39.7      | 35        |
| 1955.1571  | 3         | 1955.1568   | 0.0004    | 296       | 313     | 0        | 54.95     | 26        |
| 1046.5768  | 2         | 1046.576    | 0.0007    | 72        | 80      | 0        | 37.41     | 37        |
| 2941.506   | 3         | 2941.5073   | -0.0013   | 85        | 109     | 1        | 64.27     | 35        |
| 1145.6039  | 2         | 1145.604    | -0.0001   | 50        | 61      | 0        | 66.41     | 39        |
| 1165.5993  | 2         | 1165.5979   | 0.0014    | 66        | 76      | 0        | 38.57     | 37        |
| 1340.7036  | 2         | 1340.7048   | -0.0012   | 53        | 65      | 0        | 46.96     | 36        |
| 1908.0318  | 2         | 1908.0316   | 0.0001    | 616       | 635     | 0        | 51.89     | 34        |
| 1252.6517  | 2         | 1252.6524   | -0.0007   | 31        | 42      | 0        | 51.19     | 36        |
| 1813.971   | 2         | 1813.9713   | -0.0003   | 200       | 215     | 0        | 42.74     | 36        |
| 880.5752   | 2         | 880.5746    | 0.0006    | 266       | 274     | 1        | 23.2      | 20        |
| 1301.6146  | 2         | 1301.614    | 0.0006    | 247       | 258     | 0        | 67.47     | 35        |
| 1003.5317  | 2         | 1003.5298   | 0.0019    | 100       | 109     | 0        | 39.39     | 38        |
| 2487.2408  | 3         | 2487.2434   | -0.0026   | 437       | 458     | 0        | 53.53     | 37        |
| 1072.483   | 2         | 1072.4825   | 0.0005    | 280       | 288     | 0        | 44.22     | 32        |
| 1216.681   | 2         | 1216.6815   | -0.0005   | 183       | 193     | 0        | 48.51     | 36        |
| 828.5066   | 2         | 828.5069    | -0.0003   | 115       | 121     | 0        | 34.71     | 34        |
| 1380.8447  | 3         | 1380.8453   | -0.0006   | 43        | 55      | 1        | 39.4      | 26        |
| 1391.6225  | 2         | 1391.6239   | -0.0014   | 28        | 39      | 0        | 41.17     | 34        |
| 1209.6399  | 2         | 1209.6394   | 0.0006    | 146       | 155     | 0        | 50.67     | 36        |
| 1239.6602  | 2         | 1239.6612   | -0.001    | 285       | 296     | 0        | 38.27     | 35        |
| 943.5337   | 2         | 943.5338    | -0.0001   | 246       | 253     | 0        | 37.82     | 37        |
| 1467.8596  | 3         | 1467.8595   | 0         | 38        | 49      | 1        | 48.99     | 30        |
| 1015.5248  | 2         | 1015.5233   | 0.0015    | 164       | 174     | 0        | 39.69     | 37        |
| 2001.9449  | 3         | 2001.9392   | 0.0057    | 129       | 147     | 0        | 42.76     | 37        |
| 1132.5093  | 2         | 1132.5084   | 0.0009    | 300       | 309     | 0        | 36.87     | 33        |
| 1239.6822  | 2         | 1239.6823   | -0.0001   | 203       | 213     | 0        | 40.23     | 34        |
| 1067.5978  | 2         | 1067.5975   | 0.0003    | 494       | 503     | 0        | 36.58     | 33        |
| 2569.3638  | 3         | 2569.364    | -0.0002   | 170       | 194     | 0        | 40.54     | 34        |
| 1169.5568  | 2         | 1169.5564   | 0.0004    | 182       | 191     | 0        | 38.85     | 35        |
| 1250.6247  | 2         | 1250.625    | -0.0003   | 752       | 763     | 0        | 41.03     | 38        |
| 963.4404   | 2         | 963.441     | -0.0005   | 100       | 107     | 0        | 40.34     | 35        |
| 1694.993   | 3         | 1694.9931   | -0.0001   | 53        | 67      | 1        | 29.38     | 28        |
| 1453.7286  | 3         | 1453.7273   | 0.0013    | 77        | 89      | 1        | 38.34     | 37        |
| 3956.0566  | 3         | 3956.0571   | -0.0006   | 213       | 248     | 0        | 33.25     | 33        |
| pep_exp_mr | pep_exp_z | pep_calc_mr | pep_delta | pep_start | pep_end | pep_miss | pep_score | pep_ident |
| 975.4696   | 2         | 975.4695    | 0.0001    | 351       | 359     | 0        | 71        | 37        |
| 1026.5499  | 2         | 1026.5498   | 0.0001    | 310       | 318     | 0        | 69.41     | 34        |
| 1138.6861  | 2         | 1138.6862   | -0.0001   | 253       | 262     | 0        | 64.51     | 28        |
| 1145.5818  | 2         | 1145.5829   | -0.0011   | 242       | 251     | 0        | 50.37     | 38        |
| 1214.5747  | 2         | 1214.5754   | -0.0007   | 381       | 390     | 0        | 73.61     | 35        |
| 1298.6137  | 2         | 1298.6143   | -0.0006   | 47        | 58      | 0        | 76.81     | 35        |

|           |   |           |         |     |     |   |        |    |
|-----------|---|-----------|---------|-----|-----|---|--------|----|
| 1401.6491 | 2 | 1401.6495 | -0.0004 | 163 | 174 | 0 | 71.54  | 35 |
| 1621.8443 | 2 | 1621.8439 | 0.0004  | 263 | 276 | 0 | 66.69  | 37 |
| 1646.8003 | 2 | 1646.8008 | -0.0005 | 63  | 77  | 0 | 68.18  | 37 |
| 1695.8247 | 2 | 1695.8257 | -0.0009 | 337 | 350 | 0 | 82.13  | 37 |
| 1821.9147 | 2 | 1821.9156 | -0.0009 | 3   | 19  | 0 | 108.91 | 38 |
| 1950.8784 | 2 | 1950.8815 | -0.0031 | 363 | 379 | 0 | 132.92 | 35 |
| 1971.988  | 2 | 1971.9902 | -0.0021 | 104 | 121 | 0 | 119.57 | 37 |
| 2366.1208 | 2 | 2366.1212 | -0.0004 | 277 | 297 | 0 | 71.56  | 37 |
| 2763.3138 | 3 | 2763.3143 | -0.0005 | 217 | 241 | 0 | 82.33  | 37 |
| 2797.3318 | 3 | 2797.3361 | -0.0043 | 78  | 103 | 1 | 69.61  | 37 |
| 3199.4629 | 3 | 3199.4669 | -0.0041 | 20  | 46  | 0 | 85.8   | 35 |
| 3309.5026 | 3 | 3309.5064 | -0.0039 | 123 | 154 | 0 | 93.24  | 34 |
| 1058.5211 | 2 | 1058.5219 | -0.0008 | 310 | 318 | 0 | 41     | 35 |
| 1138.6861 | 2 | 1138.6862 | -0.0001 | 253 | 262 | 0 | 64.51  | 28 |
| 1145.5818 | 2 | 1145.5829 | -0.0011 | 242 | 251 | 0 | 50.37  | 38 |
| 1214.5747 | 2 | 1214.5754 | -0.0007 | 381 | 390 | 0 | 73.61  | 35 |
| 1295.5991 | 2 | 1295.5994 | -0.0003 | 36  | 46  | 0 | 75.48  | 36 |
| 1383.6927 | 2 | 1383.6931 | -0.0004 | 163 | 174 | 0 | 58.76  | 36 |
| 1444.6401 | 2 | 1444.6405 | -0.0004 | 47  | 58  | 0 | 102.88 | 33 |
| 1445.6802 | 2 | 1445.682  | -0.0018 | 325 | 336 | 0 | 83.14  | 36 |
| 1621.8443 | 2 | 1621.8439 | 0.0004  | 263 | 276 | 0 | 66.69  | 37 |
| 1646.8003 | 2 | 1646.8008 | -0.0005 | 63  | 77  | 0 | 68.18  | 37 |
| 1695.8247 | 2 | 1695.8257 | -0.0009 | 337 | 350 | 0 | 82.13  | 37 |
| 1821.9147 | 2 | 1821.9156 | -0.0009 | 3   | 19  | 0 | 108.91 | 38 |
| 1950.8784 | 2 | 1950.8815 | -0.0031 | 363 | 379 | 0 | 132.92 | 35 |
| 1971.988  | 2 | 1971.9902 | -0.0021 | 104 | 121 | 0 | 119.57 | 37 |
| 2801.2908 | 3 | 2801.2946 | -0.0038 | 78  | 103 | 1 | 93.09  | 35 |
| 1214.6445 | 2 | 1214.6441 | 0.0004  | 164 | 175 | 0 | 85.22  | 37 |
| 1225.583  | 2 | 1225.5827 | 0.0004  | 81  | 91  | 0 | 63.08  | 36 |
| 1227.621  | 2 | 1227.6207 | 0.0003  | 29  | 39  | 0 | 61.25  | 36 |
| 1277.6219 | 2 | 1277.6227 | -0.0008 | 243 | 252 | 0 | 45.69  | 38 |
| 1294.6563 | 2 | 1294.6557 | 0.0006  | 308 | 317 | 0 | 77.81  | 37 |
| 1307.6972 | 2 | 1307.6972 | -0.0001 | 133 | 144 | 0 | 68.59  | 36 |
| 1357.6075 | 2 | 1357.6084 | -0.0009 | 546 | 556 | 0 | 70.43  | 34 |
| 1385.7209 | 2 | 1385.7224 | -0.0015 | 604 | 615 | 0 | 60.24  | 37 |
| 1406.7556 | 2 | 1406.7558 | -0.0002 | 352 | 363 | 0 | 86.71  | 35 |
| 1430.7364 | 2 | 1430.7365 | -0.0001 | 335 | 348 | 0 | 98.27  | 37 |
| 1472.6771 | 2 | 1472.6783 | -0.0013 | 40  | 52  | 0 | 78.71  | 35 |
| 1521.7938 | 3 | 1521.7939 | -0.0001 | 306 | 317 | 1 | 50.34  | 37 |
| 1595.8119 | 2 | 1595.8116 | 0.0003  | 117 | 130 | 0 | 73.97  | 37 |
| 1660.8246 | 2 | 1660.8243 | 0.0003  | 60  | 74  | 0 | 106.86 | 38 |
| 1674.722  | 2 | 1674.7234 | -0.0014 | 227 | 242 | 0 | 93.66  | 32 |
| 1679.827  | 2 | 1679.8267 | 0.0002  | 145 | 159 | 0 | 51.17  | 38 |
| 2573.2622 | 2 | 2573.2609 | 0.0014  | 368 | 393 | 0 | 155.4  | 37 |
| 2587.2103 | 3 | 2587.2126 | -0.0022 | 5   | 28  | 0 | 39.36  | 36 |
| 2657.2616 | 2 | 2657.2609 | 0.0007  | 431 | 453 | 0 | 81.43  | 37 |
| 1058.5211 | 2 | 1058.5219 | -0.0008 | 310 | 318 | 0 | 41     | 35 |
| 1138.6861 | 2 | 1138.6862 | -0.0001 | 253 | 262 | 0 | 64.51  | 28 |
| 1145.5818 | 2 | 1145.5829 | -0.0011 | 242 | 251 | 0 | 50.37  | 38 |
| 1214.5747 | 2 | 1214.5754 | -0.0007 | 381 | 390 | 0 | 73.61  | 35 |
| 1383.6927 | 2 | 1383.6931 | -0.0004 | 163 | 174 | 0 | 58.76  | 36 |
| 1430.6232 | 2 | 1430.6248 | -0.0016 | 47  | 58  | 0 | 83.6   | 32 |
| 1445.6802 | 2 | 1445.682  | -0.0018 | 325 | 336 | 0 | 83.14  | 36 |
| 1621.8443 | 2 | 1621.8439 | 0.0004  | 263 | 276 | 0 | 66.69  | 37 |
| 1632.7856 | 2 | 1632.7851 | 0.0004  | 63  | 77  | 0 | 57.77  | 37 |
| 1695.8247 | 2 | 1695.8257 | -0.0009 | 337 | 350 | 0 | 82.13  | 37 |
| 1821.9147 | 2 | 1821.9156 | -0.0009 | 3   | 19  | 0 | 108.91 | 38 |
| 1950.8784 | 2 | 1950.8815 | -0.0031 | 363 | 379 | 0 | 132.92 | 35 |

|           |   |           |         |     |     |   |        |    |
|-----------|---|-----------|---------|-----|-----|---|--------|----|
| 1971.988  | 2 | 1971.9902 | -0.0021 | 104 | 121 | 0 | 119.57 | 37 |
| 2813.329  | 3 | 2813.331  | -0.002  | 78  | 103 | 1 | 66.36  | 36 |
| 1214.6445 | 2 | 1214.6441 | 0.0004  | 164 | 175 | 0 | 85.22  | 37 |
| 1227.621  | 2 | 1227.6207 | 0.0003  | 29  | 39  | 0 | 61.25  | 36 |
| 1229.5228 | 2 | 1229.5234 | -0.0006 | 81  | 91  | 0 | 50.96  | 31 |
| 1277.6219 | 2 | 1277.6227 | -0.0008 | 243 | 252 | 0 | 45.69  | 38 |
| 1312.6117 | 2 | 1312.6122 | -0.0004 | 308 | 317 | 0 | 73.34  | 36 |
| 1357.6075 | 2 | 1357.6084 | -0.0009 | 546 | 556 | 0 | 70.43  | 34 |
| 1385.7209 | 2 | 1385.7224 | -0.0015 | 604 | 615 | 0 | 60.24  | 37 |
| 1425.7564 | 2 | 1425.7576 | -0.0012 | 335 | 348 | 0 | 57.93  | 36 |
| 1435.7452 | 2 | 1435.746  | -0.0007 | 352 | 363 | 0 | 57.43  | 37 |
| 1472.6771 | 2 | 1472.6783 | -0.0013 | 40  | 52  | 0 | 78.71  | 35 |
| 1539.7502 | 3 | 1539.7504 | -0.0002 | 306 | 317 | 1 | 58.19  | 37 |
| 1565.8008 | 2 | 1565.8011 | -0.0002 | 117 | 130 | 0 | 93.03  | 38 |
| 1662.802  | 2 | 1662.8036 | -0.0015 | 60  | 74  | 0 | 102.92 | 37 |
| 1674.722  | 2 | 1674.7234 | -0.0014 | 227 | 242 | 0 | 93.66  | 32 |
| 1679.827  | 2 | 1679.8267 | 0.0002  | 145 | 159 | 0 | 51.17  | 38 |
| 2559.2432 | 2 | 2559.2452 | -0.002  | 368 | 393 | 0 | 137.79 | 37 |
| 2587.2103 | 3 | 2587.2126 | -0.0022 | 5   | 28  | 0 | 39.36  | 36 |
| 2657.2616 | 2 | 2657.2609 | 0.0007  | 431 | 453 | 0 | 81.43  | 37 |
| 1058.5211 | 2 | 1058.5219 | -0.0008 | 310 | 318 | 0 | 41     | 35 |
| 1138.6861 | 2 | 1138.6862 | -0.0001 | 253 | 262 | 0 | 64.51  | 28 |
| 1145.5818 | 2 | 1145.5829 | -0.0011 | 242 | 251 | 0 | 50.37  | 38 |
| 1214.5747 | 2 | 1214.5754 | -0.0007 | 381 | 390 | 0 | 73.61  | 35 |
| 1307.6346 | 2 | 1307.6357 | -0.0011 | 36  | 46  | 0 | 50.04  | 38 |
| 1401.6491 | 2 | 1401.6495 | -0.0004 | 163 | 174 | 0 | 71.54  | 35 |
| 1430.6232 | 2 | 1430.6248 | -0.0016 | 47  | 58  | 0 | 83.6   | 32 |
| 1445.6802 | 2 | 1445.682  | -0.0018 | 325 | 336 | 0 | 83.14  | 36 |
| 1621.8443 | 2 | 1621.8439 | 0.0004  | 263 | 276 | 0 | 66.69  | 37 |
| 1632.7856 | 2 | 1632.7851 | 0.0004  | 63  | 77  | 0 | 57.77  | 37 |
| 1695.8247 | 2 | 1695.8257 | -0.0009 | 337 | 350 | 0 | 82.13  | 37 |
| 1950.8784 | 2 | 1950.8815 | -0.0031 | 363 | 379 | 0 | 132.92 | 35 |
| 1971.988  | 2 | 1971.9902 | -0.0021 | 104 | 121 | 0 | 119.57 | 37 |
| 2813.329  | 3 | 2813.331  | -0.002  | 78  | 103 | 1 | 66.36  | 36 |
| 986.5398  | 2 | 986.5397  | 0.0001  | 327 | 336 | 0 | 69.57  | 37 |
| 1266.5012 | 2 | 1266.5018 | -0.0006 | 312 | 320 | 0 | 52.43  | 26 |
| 1395.7494 | 2 | 1395.751  | -0.0016 | 85  | 96  | 0 | 40     | 36 |
| 1472.8555 | 2 | 1472.8562 | -0.0007 | 230 | 243 | 0 | 99.98  | 30 |
| 1597.7601 | 2 | 1597.7599 | 0.0002  | 340 | 352 | 0 | 77.52  | 37 |
| 1662.8671 | 2 | 1662.8689 | -0.0017 | 216 | 229 | 1 | 52.99  | 37 |
| 1700.8972 | 2 | 1700.8985 | -0.0013 | 65  | 79  | 0 | 76.13  | 37 |
| 1791.9195 | 2 | 1791.9229 | -0.0034 | 265 | 280 | 0 | 111.16 | 38 |
| 1856.8737 | 2 | 1856.8761 | -0.0023 | 374 | 390 | 0 | 113.24 | 37 |
| 1884.9395 | 2 | 1884.9404 | -0.0009 | 353 | 370 | 0 | 88.78  | 37 |
| 1976.8744 | 2 | 1976.8752 | -0.0009 | 41  | 60  | 0 | 102.84 | 33 |
| 2329.0111 | 3 | 2329.011  | 0.0002  | 403 | 422 | 0 | 67.36  | 32 |
| 2394.1846 | 2 | 2394.1856 | -0.0009 | 244 | 264 | 0 | 105.2  | 37 |
| 2624.2226 | 3 | 2624.225  | -0.0025 | 281 | 304 | 0 | 48.97  | 36 |
| 934.512   | 2 | 934.5124  | -0.0004 | 129 | 137 | 0 | 49.95  | 35 |
| 957.5131  | 2 | 957.5131  | 0.0001  | 118 | 125 | 0 | 51.34  | 36 |
| 975.5498  | 2 | 975.5502  | -0.0004 | 376 | 384 | 0 | 60.94  | 36 |
| 1016.5388 | 2 | 1016.539  | -0.0001 | 245 | 253 | 0 | 40.58  | 38 |
| 1113.6756 | 2 | 1113.6758 | -0.0001 | 331 | 340 | 0 | 78.84  | 32 |
| 1141.565  | 2 | 1141.5663 | -0.0013 | 138 | 148 | 0 | 58.18  | 35 |
| 1172.6404 | 2 | 1172.6401 | 0.0004  | 244 | 253 | 1 | 42.99  | 38 |
| 1400.7246 | 2 | 1400.726  | -0.0014 | 76  | 89  | 0 | 112.7  | 37 |
| 1501.871  | 2 | 1501.8729 | -0.002  | 153 | 167 | 0 | 70.3   | 30 |
| 1570.7004 | 2 | 1570.7007 | -0.0003 | 184 | 196 | 0 | 94.01  | 34 |

|           |   |           |         |     |     |   |        |    |
|-----------|---|-----------|---------|-----|-----|---|--------|----|
| 1826.9306 | 2 | 1826.9315 | -0.0009 | 53  | 68  | 1 | 88.84  | 37 |
| 1919.9942 | 2 | 1919.988  | 0.0062  | 396 | 412 | 0 | 76.11  | 37 |
| 2026.8855 | 3 | 2026.8875 | -0.002  | 300 | 317 | 1 | 82.78  | 33 |
| 2058.0814 | 2 | 2058.082  | -0.0005 | 213 | 231 | 0 | 129.53 | 36 |
| 957.5131  | 2 | 957.5131  | 0.0001  | 118 | 125 | 0 | 51.34  | 36 |
| 1016.5388 | 2 | 1016.539  | -0.0001 | 245 | 253 | 0 | 40.58  | 38 |
| 1113.6756 | 2 | 1113.6758 | -0.0001 | 331 | 340 | 0 | 78.84  | 32 |
| 1141.565  | 2 | 1141.5663 | -0.0013 | 138 | 148 | 0 | 58.18  | 35 |
| 1172.6404 | 2 | 1172.6401 | 0.0004  | 244 | 253 | 1 | 42.99  | 38 |
| 1400.7246 | 2 | 1400.726  | -0.0014 | 76  | 89  | 0 | 112.7  | 37 |
| 1446.7557 | 2 | 1446.7467 | 0.009   | 376 | 388 | 0 | 72.48  | 38 |
| 1501.871  | 2 | 1501.8729 | -0.002  | 153 | 167 | 0 | 70.3   | 30 |
| 1570.7004 | 2 | 1570.7007 | -0.0003 | 184 | 196 | 0 | 94.01  | 34 |
| 1826.9306 | 2 | 1826.9315 | -0.0009 | 53  | 68  | 1 | 88.84  | 37 |
| 1919.9942 | 2 | 1919.988  | 0.0062  | 396 | 412 | 0 | 76.11  | 37 |
| 2026.8855 | 3 | 2026.8875 | -0.002  | 300 | 317 | 1 | 82.78  | 33 |
| 2058.0814 | 2 | 2058.082  | -0.0005 | 213 | 231 | 0 | 129.53 | 36 |
| 1196.6872 | 2 | 1196.6877 | -0.0005 | 164 | 175 | 0 | 78.2   | 33 |
| 1227.621  | 2 | 1227.6207 | 0.0003  | 29  | 39  | 0 | 61.25  | 36 |
| 1277.6219 | 2 | 1277.6227 | -0.0008 | 243 | 252 | 0 | 45.69  | 38 |
| 1357.6075 | 2 | 1357.6084 | -0.0009 | 546 | 556 | 0 | 70.43  | 34 |
| 1435.7452 | 2 | 1435.746  | -0.0007 | 352 | 363 | 0 | 57.43  | 37 |
| 1472.6771 | 2 | 1472.6783 | -0.0013 | 40  | 52  | 0 | 78.71  | 35 |
| 1662.802  | 2 | 1662.8036 | -0.0015 | 60  | 74  | 0 | 102.92 | 37 |
| 1674.722  | 2 | 1674.7234 | -0.0014 | 227 | 242 | 0 | 93.66  | 32 |
| 1679.827  | 2 | 1679.8267 | 0.0002  | 145 | 159 | 0 | 51.17  | 38 |
| 2573.2622 | 2 | 2573.2609 | 0.0014  | 368 | 393 | 0 | 155.4  | 37 |
| 2587.2103 | 3 | 2587.2126 | -0.0022 | 5   | 28  | 0 | 39.36  | 36 |
| 1227.621  | 2 | 1227.6207 | 0.0003  | 29  | 39  | 0 | 61.25  | 36 |
| 1230.6396 | 2 | 1230.6391 | 0.0006  | 164 | 175 | 0 | 54.58  | 38 |
| 1259.675  | 2 | 1259.6761 | -0.0011 | 133 | 144 | 0 | 66.96  | 37 |
| 1277.6219 | 2 | 1277.6227 | -0.0008 | 243 | 252 | 0 | 45.69  | 38 |
| 1312.6117 | 2 | 1312.6122 | -0.0004 | 308 | 317 | 0 | 73.34  | 36 |
| 1357.6075 | 2 | 1357.6084 | -0.0009 | 546 | 556 | 0 | 70.43  | 34 |
| 1435.7452 | 2 | 1435.746  | -0.0007 | 352 | 363 | 0 | 57.43  | 37 |
| 1472.6771 | 2 | 1472.6783 | -0.0013 | 40  | 52  | 0 | 78.71  | 35 |
| 1539.7502 | 3 | 1539.7504 | -0.0002 | 306 | 317 | 1 | 58.19  | 37 |
| 1674.722  | 2 | 1674.7234 | -0.0014 | 227 | 242 | 0 | 93.66  | 32 |
| 1679.827  | 2 | 1679.8267 | 0.0002  | 145 | 159 | 0 | 51.17  | 38 |
| 2573.2622 | 2 | 2573.2609 | 0.0014  | 368 | 393 | 0 | 155.4  | 37 |
| 2587.2103 | 3 | 2587.2126 | -0.0022 | 5   | 28  | 0 | 39.36  | 36 |
| 932.4594  | 2 | 932.4603  | -0.0009 | 411 | 418 | 0 | 39.11  | 38 |
| 954.5647  | 2 | 954.5651  | -0.0004 | 461 | 468 | 0 | 35.26  | 31 |
| 1090.5909 | 2 | 1090.591  | -0.0001 | 496 | 504 | 0 | 48.89  | 36 |
| 1160.5726 | 2 | 1160.5727 | -0.0001 | 290 | 299 | 0 | 60.58  | 37 |
| 1162.6338 | 2 | 1162.6346 | -0.0008 | 395 | 403 | 1 | 58.88  | 36 |
| 1316.7156 | 2 | 1316.7162 | -0.0006 | 219 | 230 | 0 | 59.17  | 37 |
| 1381.5788 | 2 | 1381.5795 | -0.0007 | 354 | 364 | 0 | 80.73  | 31 |
| 1392.7394 | 2 | 1392.7402 | -0.0007 | 427 | 439 | 0 | 42.62  | 36 |
| 1608.8714 | 2 | 1608.8722 | -0.0009 | 310 | 324 | 0 | 68.66  | 34 |
| 1650.812  | 2 | 1650.8114 | 0.0006  | 169 | 183 | 0 | 73.84  | 37 |
| 1701.7299 | 2 | 1701.7304 | -0.0006 | 258 | 273 | 0 | 118.57 | 31 |
| 1719.865  | 2 | 1719.8679 | -0.0029 | 516 | 530 | 0 | 122.99 | 38 |
| 1970.0473 | 2 | 1970.0473 | 0       | 478 | 495 | 0 | 63.8   | 35 |
| 2196.1018 | 2 | 2196.1022 | -0.0004 | 197 | 218 | 0 | 94.04  | 37 |
| 2656.3407 | 3 | 2656.3418 | -0.0011 | 365 | 386 | 0 | 67.04  | 37 |
| 1058.5211 | 2 | 1058.5219 | -0.0008 | 310 | 318 | 0 | 41     | 35 |
| 1138.6861 | 2 | 1138.6862 | -0.0001 | 253 | 262 | 0 | 64.51  | 28 |

|           |   |           |         |     |     |   |        |    |
|-----------|---|-----------|---------|-----|-----|---|--------|----|
| 1145.5818 | 2 | 1145.5829 | -0.0011 | 242 | 251 | 0 | 50.37  | 38 |
| 1214.5747 | 2 | 1214.5754 | -0.0007 | 381 | 390 | 0 | 73.61  | 35 |
| 1383.6927 | 2 | 1383.6931 | -0.0004 | 163 | 174 | 0 | 58.76  | 36 |
| 1430.6232 | 2 | 1430.6248 | -0.0016 | 47  | 58  | 0 | 83.6   | 32 |
| 1445.6802 | 2 | 1445.682  | -0.0018 | 325 | 336 | 0 | 83.14  | 36 |
| 1621.8443 | 2 | 1621.8439 | 0.0004  | 263 | 276 | 0 | 66.69  | 37 |
| 1695.8247 | 2 | 1695.8257 | -0.0009 | 337 | 350 | 0 | 82.13  | 37 |
| 1955.9945 | 3 | 1955.9953 | -0.0008 | 104 | 121 | 0 | 50     | 37 |
| 919.4795  | 2 | 919.4797  | -0.0001 | 43  | 52  | 0 | 91.11  | 38 |
| 940.5011  | 2 | 940.5018  | -0.0007 | 63  | 70  | 0 | 36.33  | 34 |
| 1438.6788 | 2 | 1438.6801 | -0.0013 | 27  | 42  | 0 | 129.16 | 37 |
| 1500.7041 | 2 | 1500.7056 | -0.0015 | 76  | 89  | 0 | 129.39 | 36 |
| 2155.0154 | 2 | 2155.0181 | -0.0027 | 71  | 89  | 1 | 85.86  | 37 |
| 986.5398  | 2 | 986.5397  | 0.0001  | 327 | 336 | 0 | 69.57  | 37 |
| 1266.5012 | 2 | 1266.5018 | -0.0006 | 312 | 320 | 0 | 52.43  | 26 |
| 1395.7494 | 2 | 1395.751  | -0.0016 | 85  | 96  | 0 | 40     | 36 |
| 1530.8979 | 2 | 1530.8981 | -0.0001 | 230 | 243 | 0 | 116.84 | 28 |
| 1583.7446 | 2 | 1583.7443 | 0.0003  | 340 | 352 | 0 | 76.12  | 36 |
| 1700.8972 | 2 | 1700.8985 | -0.0013 | 65  | 79  | 0 | 76.13  | 37 |
| 1867.8904 | 2 | 1867.892  | -0.0016 | 374 | 390 | 0 | 119.13 | 37 |
| 1884.9395 | 2 | 1884.9404 | -0.0009 | 353 | 370 | 0 | 88.78  | 37 |
| 2329.0111 | 3 | 2329.011  | 0.0002  | 403 | 422 | 0 | 67.36  | 32 |
| 832.4552  | 2 | 832.4555  | -0.0003 | 8   | 15  | 0 | 43.21  | 38 |
| 1497.8404 | 2 | 1497.8403 | 0.0001  | 239 | 252 | 0 | 104.51 | 34 |
| 1675.9662 | 3 | 1675.9661 | 0.0001  | 70  | 84  | 1 | 56.37  | 29 |
| 1733.8071 | 2 | 1733.8083 | -0.0012 | 131 | 145 | 0 | 74.13  | 36 |
| 1760.779  | 2 | 1760.7794 | -0.0004 | 314 | 327 | 0 | 78.23  | 33 |
| 2032.0638 | 2 | 2032.0663 | -0.0025 | 172 | 190 | 0 | 73.5   | 37 |
| 2171.001  | 2 | 2171.0019 | -0.0008 | 276 | 295 | 0 | 128.52 | 36 |
| 2249.0648 | 2 | 2249.0668 | -0.0019 | 146 | 166 | 0 | 129.51 | 37 |
| 822.4962  | 2 | 822.4963  | -0.0001 | 185 | 191 | 0 | 30.1   | 28 |
| 1094.6382 | 2 | 1094.6376 | 0.0006  | 382 | 390 | 0 | 43.14  | 31 |
| 1128.6383 | 2 | 1128.6391 | -0.0007 | 465 | 476 | 0 | 62.35  | 35 |
| 1156.6436 | 2 | 1156.6452 | -0.0016 | 316 | 326 | 0 | 80.95  | 36 |
| 1388.6639 | 2 | 1388.6646 | -0.0007 | 330 | 341 | 0 | 74.5   | 36 |
| 1434.6614 | 2 | 1434.6626 | -0.0012 | 113 | 124 | 1 | 74.05  | 36 |
| 1680.9416 | 2 | 1680.941  | 0.0006  | 342 | 357 | 0 | 97.79  | 32 |
| 1767.7782 | 3 | 1767.7787 | -0.0005 | 143 | 157 | 0 | 70.35  | 33 |
| 1811.9647 | 2 | 1811.9638 | 0.001   | 441 | 456 | 0 | 50.85  | 35 |
| 1922.0396 | 2 | 1922.0394 | 0.0002  | 93  | 112 | 0 | 85.17  | 34 |
| 2113.0422 | 2 | 2113.0426 | -0.0004 | 205 | 222 | 0 | 83.76  | 37 |
| 913.5592  | 2 | 913.5597  | -0.0005 | 419 | 427 | 0 | 39.85  | 33 |
| 1006.5466 | 3 | 1006.5447 | 0.0019  | 165 | 172 | 1 | 42.35  | 37 |
| 1024.6021 | 2 | 1024.603  | -0.0009 | 244 | 254 | 0 | 69.99  | 29 |
| 1025.481  | 2 | 1025.4818 | -0.0008 | 205 | 212 | 0 | 44.77  | 35 |
| 1119.5914 | 2 | 1119.5924 | -0.001  | 21  | 30  | 0 | 55.92  | 37 |
| 1209.5691 | 2 | 1209.5699 | -0.0009 | 42  | 51  | 1 | 39.51  | 36 |
| 1297.7389 | 2 | 1297.7394 | -0.0005 | 135 | 146 | 0 | 89.47  | 33 |
| 1450.6652 | 2 | 1450.6663 | -0.0011 | 85  | 96  | 0 | 68.5   | 36 |
| 1633.8939 | 3 | 1633.894  | -0.0002 | 6   | 20  | 0 | 62.54  | 34 |
| 2311.1178 | 3 | 2311.1228 | -0.005  | 392 | 411 | 1 | 50.18  | 37 |
| 2505.3208 | 2 | 2505.3223 | -0.0014 | 255 | 278 | 1 | 59.34  | 35 |
| 2956.4146 | 3 | 2956.4158 | -0.0012 | 101 | 129 | 0 | 66.35  | 36 |
| 1155.5974 | 2 | 1155.5958 | 0.0016  | 81  | 90  | 0 | 36.18  | 36 |
| 1192.6556 | 2 | 1192.6564 | -0.0008 | 138 | 147 | 0 | 79.12  | 35 |
| 1216.5983 | 2 | 1216.5989 | -0.0006 | 321 | 330 | 0 | 54.09  | 37 |
| 1279.6217 | 2 | 1279.6231 | -0.0014 | 207 | 217 | 0 | 81.52  | 37 |
| 1422.656  | 2 | 1422.6568 | -0.0007 | 183 | 193 | 0 | 74.69  | 36 |

|           |   |           |         |      |      |   |        |    |
|-----------|---|-----------|---------|------|------|---|--------|----|
| 1482.8137 | 2 | 1482.8155 | -0.0017 | 102  | 116  | 0 | 88.64  | 34 |
| 1601.8636 | 2 | 1601.8633 | 0.0003  | 306  | 320  | 0 | 58.02  | 36 |
| 1802.9265 | 2 | 1802.9262 | 0.0003  | 348  | 365  | 0 | 109.24 | 37 |
| 792.4376  | 2 | 792.4382  | -0.0005 | 219  | 225  | 0 | 50.43  | 35 |
| 815.4864  | 2 | 815.4865  | -0.0001 | 121  | 127  | 0 | 36.5   | 35 |
| 1221.6239 | 2 | 1221.6241 | -0.0002 | 149  | 158  | 0 | 54.23  | 37 |
| 1478.7719 | 2 | 1478.7729 | -0.001  | 147  | 158  | 1 | 79.86  | 37 |
| 1514.7082 | 2 | 1514.7101 | -0.0019 | 354  | 368  | 0 | 125.94 | 36 |
| 1682.8298 | 2 | 1681.8311 | 0.9987  | 88   | 101  | 0 | 87.98  | 37 |
| 1812.9942 | 2 | 1812.9954 | -0.0012 | 312  | 328  | 0 | 82     | 35 |
| 1845.8482 | 2 | 1845.8493 | -0.0011 | 159  | 174  | 0 | 80.24  | 35 |
| 856.5133  | 2 | 856.513   | 0.0002  | 545  | 551  | 0 | 37.29  | 35 |
| 1129.5617 | 2 | 1129.5615 | 0.0002  | 613  | 622  | 0 | 52.38  | 36 |
| 1189.6691 | 2 | 1189.6707 | -0.0015 | 398  | 408  | 0 | 59.31  | 34 |
| 1234.5669 | 2 | 1234.5677 | -0.0008 | 552  | 563  | 0 | 64.48  | 36 |
| 1416.7192 | 2 | 1416.7209 | -0.0016 | 112  | 125  | 0 | 66.65  | 37 |
| 1416.7277 | 2 | 1416.7283 | -0.0006 | 382  | 394  | 0 | 108.08 | 38 |
| 1549.7889 | 2 | 1549.7889 | 0       | 193  | 206  | 0 | 41.65  | 38 |
| 1612.8665 | 3 | 1612.8685 | -0.002  | 352  | 364  | 1 | 68.69  | 35 |
| 1820.8984 | 2 | 1820.9017 | -0.0033 | 472  | 488  | 0 | 118.62 | 38 |
| 904.4507  | 2 | 904.4502  | 0.0006  | 291  | 298  | 0 | 48.65  | 38 |
| 1247.6762 | 2 | 1247.6761 | 0       | 393  | 403  | 0 | 69.08  | 36 |
| 1248.5573 | 2 | 1248.5582 | -0.0009 | 547  | 558  | 0 | 65.35  | 34 |
| 1293.5736 | 2 | 1293.5758 | -0.0022 | 618  | 629  | 0 | 56.43  | 34 |
| 1326.6304 | 2 | 1326.6303 | 0.0001  | 581  | 592  | 0 | 67.25  | 36 |
| 1360.7331 | 2 | 1360.7351 | -0.002  | 160  | 172  | 0 | 49.57  | 37 |
| 1416.7277 | 2 | 1416.7283 | -0.0006 | 377  | 389  | 0 | 108.08 | 38 |
| 1549.7889 | 2 | 1549.7889 | 0       | 188  | 201  | 0 | 41.65  | 38 |
| 1812.9464 | 2 | 1812.9469 | -0.0004 | 601  | 617  | 0 | 106.97 | 36 |
| 815.4864  | 2 | 815.4865  | -0.0001 | 121  | 127  | 0 | 36.5   | 35 |
| 1221.6239 | 2 | 1221.6241 | -0.0002 | 149  | 158  | 0 | 54.23  | 37 |
| 1478.7719 | 2 | 1478.7729 | -0.001  | 147  | 158  | 1 | 79.86  | 37 |
| 1514.7082 | 2 | 1514.7101 | -0.0019 | 354  | 368  | 0 | 125.94 | 36 |
| 1725.768  | 2 | 1725.7702 | -0.0022 | 219  | 233  | 0 | 62.33  | 34 |
| 1764.9052 | 2 | 1764.9046 | 0.0006  | 88   | 102  | 0 | 79     | 37 |
| 1799.9294 | 2 | 1799.9305 | -0.0011 | 46   | 63   | 0 | 57.61  | 37 |
| 847.4911  | 2 | 847.4916  | -0.0005 | 445  | 452  | 0 | 50.14  | 34 |
| 1268.7087 | 2 | 1268.7088 | -0.0001 | 512  | 524  | 0 | 81.16  | 34 |
| 1275.642  | 2 | 1275.6427 | -0.0008 | 230  | 240  | 0 | 72.87  | 38 |
| 1467.7759 | 2 | 1467.7755 | 0.0003  | 599  | 611  | 0 | 65.89  | 36 |
| 1482.754  | 2 | 1482.7541 | -0.0001 | 389  | 400  | 0 | 80.53  | 37 |
| 1567.8237 | 2 | 1567.8246 | -0.0008 | 273  | 285  | 0 | 55.81  | 36 |
| 2240.226  | 2 | 2240.2264 | -0.0003 | 49   | 70   | 0 | 98.59  | 32 |
| 1151.7063 | 2 | 1151.7067 | -0.0004 | 157  | 167  | 0 | 42.08  | 24 |
| 1696.752  | 2 | 1696.754  | -0.002  | 73   | 87   | 0 | 95.62  | 34 |
| 2149.1236 | 2 | 2149.1242 | -0.0005 | 278  | 296  | 0 | 121.01 | 36 |
| 2346.1806 | 2 | 2346.1815 | -0.0009 | 410  | 432  | 0 | 142.16 | 37 |
| 1138.5739 | 2 | 1138.5731 | 0.0009  | 973  | 981  | 0 | 79.64  | 37 |
| 1314.6897 | 2 | 1314.6892 | 0.0006  | 1259 | 1271 | 0 | 52.33  | 37 |
| 1491.7353 | 2 | 1491.7358 | -0.0005 | 1044 | 1055 | 0 | 43.03  | 38 |
| 1872.8374 | 2 | 1872.8391 | -0.0017 | 582  | 597  | 0 | 107.92 | 34 |
| 1954.9642 | 3 | 1954.965  | -0.0008 | 982  | 997  | 0 | 66.41  | 37 |
| 1985.9358 | 2 | 1985.9371 | -0.0013 | 614  | 630  | 0 | 64.02  | 36 |
| 2167.9805 | 3 | 2166.9777 | 1.0028  | 535  | 553  | 0 | 72.11  | 35 |
| 975.441   | 2 | 975.441   | 0       | 21   | 30   | 0 | 59.64  | 33 |
| 1143.5517 | 2 | 1143.5529 | -0.0012 | 42   | 52   | 0 | 37.14  | 35 |
| 1197.6981 | 2 | 1197.6982 | -0.0001 | 31   | 41   | 1 | 55.5   | 33 |
| 1474.6676 | 2 | 1474.6688 | -0.0012 | 362  | 374  | 0 | 77.45  | 34 |

|           |   |           |         |     |     |   |        |    |
|-----------|---|-----------|---------|-----|-----|---|--------|----|
| 1514.7414 | 2 | 1514.7419 | -0.0005 | 87  | 97  | 0 | 38.17  | 37 |
| 1854.9251 | 2 | 1854.9251 | 0       | 218 | 233 | 0 | 119.22 | 37 |
| 2182.0702 | 2 | 2182.0729 | -0.0026 | 294 | 314 | 0 | 41.39  | 38 |
| 3150.6331 | 3 | 3150.635  | -0.0019 | 150 | 179 | 0 | 79.14  | 34 |
| 1241.6426 | 2 | 1241.6438 | -0.0012 | 80  | 90  | 0 | 40.07  | 35 |
| 1934.0261 | 2 | 1934.0262 | -0.0001 | 180 | 197 | 0 | 115.28 | 36 |
| 2430.2296 | 2 | 2430.2319 | -0.0022 | 249 | 271 | 0 | 111.72 | 37 |
| 1212.6715 | 2 | 1212.6714 | 0.0001  | 296 | 306 | 0 | 106.31 | 35 |
| 1587.7839 | 2 | 1587.7852 | -0.0014 | 228 | 243 | 0 | 89.2   | 37 |
| 1767.7782 | 3 | 1767.7787 | -0.0005 | 131 | 145 | 0 | 70.35  | 33 |
| 2128.0666 | 2 | 2128.0609 | 0.0057  | 193 | 210 | 0 | 53.78  | 37 |
| 2203.1673 | 3 | 2203.1711 | -0.0038 | 263 | 281 | 1 | 44.55  | 35 |
| 1282.7489 | 2 | 1282.7496 | -0.0007 | 115 | 127 | 0 | 36.56  | 32 |
| 1302.7431 | 2 | 1302.7435 | -0.0004 | 136 | 146 | 0 | 60.31  | 33 |
| 1325.6068 | 2 | 1325.6074 | -0.0007 | 270 | 280 | 0 | 65.6   | 36 |
| 1512.8302 | 3 | 1512.83   | 0.0002  | 204 | 216 | 0 | 71.82  | 35 |
| 1768.8436 | 2 | 1768.8454 | -0.0018 | 147 | 161 | 0 | 58.06  | 37 |
| 2320.204  | 3 | 2320.2063 | -0.0023 | 93  | 113 | 0 | 49.99  | 36 |
| 997.5556  | 2 | 997.5556  | 0       | 140 | 148 | 0 | 61.48  | 33 |
| 1192.6102 | 3 | 1192.6102 | 0       | 48  | 58  | 0 | 46.58  | 38 |
| 1402.7905 | 2 | 1402.7932 | -0.0028 | 150 | 162 | 0 | 94.98  | 34 |
| 1630.822  | 2 | 1630.8236 | -0.0015 | 171 | 185 | 0 | 104.64 | 38 |
| 1192.6556 | 2 | 1192.6564 | -0.0008 | 138 | 147 | 0 | 79.12  | 35 |
| 1216.5983 | 2 | 1216.5989 | -0.0006 | 321 | 330 | 0 | 54.09  | 37 |
| 1422.656  | 2 | 1422.6568 | -0.0007 | 183 | 193 | 0 | 74.69  | 36 |
| 1468.7969 | 2 | 1468.7998 | -0.0029 | 102 | 116 | 0 | 95.83  | 35 |
| 1699.9124 | 3 | 1699.9113 | 0.0011  | 305 | 320 | 0 | 44.36  | 36 |
| 2260.0706 | 2 | 2260.0707 | 0       | 346 | 367 | 0 | 55.86  | 37 |
| 1451.6823 | 2 | 1451.6834 | -0.0011 | 244 | 255 | 0 | 49.68  | 37 |
| 1501.6708 | 2 | 1501.6718 | -0.0011 | 593 | 606 | 0 | 96.34  | 34 |
| 1798.9243 | 2 | 1798.9254 | -0.0011 | 771 | 786 | 0 | 75.33  | 37 |
| 2398.1547 | 3 | 2398.1553 | -0.0005 | 349 | 368 | 1 | 60.27  | 37 |
| 1286.7007 | 2 | 1286.7016 | -0.0009 | 400 | 411 | 0 | 50.78  | 37 |
| 1750.8564 | 2 | 1750.856  | 0.0004  | 311 | 325 | 0 | 93.65  | 38 |
| 2144.0986 | 2 | 2144.1001 | -0.0014 | 182 | 201 | 0 | 103.15 | 37 |
| 2203.1258 | 2 | 2203.126  | -0.0002 | 276 | 296 | 0 | 44.89  | 37 |
| 971.5393  | 2 | 971.54    | -0.0007 | 566 | 574 | 0 | 40.77  | 37 |
| 1028.5616 | 2 | 1028.5614 | 0.0001  | 330 | 339 | 0 | 45.69  | 36 |
| 1049.5252 | 2 | 1049.5254 | -0.0001 | 521 | 529 | 0 | 62.5   | 37 |
| 1158.5859 | 2 | 1158.588  | -0.0021 | 506 | 516 | 0 | 83.12  | 37 |
| 1396.7306 | 2 | 1396.731  | -0.0004 | 236 | 248 | 0 | 62.9   | 36 |
| 1475.7747 | 2 | 1475.7773 | -0.0025 | 183 | 196 | 0 | 47.57  | 38 |
| 1891.042  | 2 | 1891.0415 | 0.0005  | 454 | 470 | 0 | 69.13  | 33 |
| 2507.3748 | 3 | 2507.3748 | 0       | 136 | 160 | 0 | 32.83  | 31 |
| 1038.6072 | 2 | 1038.6073 | -0.0001 | 64  | 72  | 0 | 49.74  | 29 |
| 1247.6256 | 2 | 1247.6258 | -0.0003 | 73  | 83  | 0 | 47.17  | 39 |
| 1322.6567 | 2 | 1322.6605 | -0.0038 | 429 | 439 | 0 | 68.98  | 38 |
| 1435.6326 | 2 | 1435.6323 | 0.0003  | 113 | 124 | 0 | 56.4   | 33 |
| 2651.3926 | 3 | 2651.3919 | 0.0007  | 319 | 341 | 0 | 67.52  | 34 |
| 2891.4818 | 3 | 2890.4859 | 0.9959  | 218 | 244 | 0 | 50.03  | 36 |
| 1292.6709 | 2 | 1292.6725 | -0.0016 | 92  | 102 | 0 | 50.25  | 38 |
| 1368.6243 | 2 | 1368.6245 | -0.0002 | 225 | 235 | 0 | 57     | 35 |
| 1668.8215 | 2 | 1668.822  | -0.0005 | 181 | 196 | 0 | 92.88  | 37 |
| 2468.1708 | 2 | 2468.1707 | 0.0001  | 453 | 475 | 0 | 76.38  | 37 |
| 2492.3531 | 3 | 2491.3435 | 1.0096  | 158 | 180 | 0 | 37.4   | 32 |
| 1172.5854 | 2 | 1172.586  | -0.0006 | 512 | 521 | 0 | 65.98  | 36 |
| 1397.6717 | 2 | 1397.6715 | 0.0003  | 206 | 217 | 0 | 66.51  | 36 |
| 2271.1586 | 2 | 2271.1595 | -0.0008 | 85  | 106 | 0 | 111.14 | 37 |

|           |   |           |         |     |     |   |        |    |
|-----------|---|-----------|---------|-----|-----|---|--------|----|
| 2521.3735 | 3 | 2521.3751 | -0.0016 | 437 | 461 | 0 | 36.27  | 31 |
| 939.5755  | 2 | 939.5753  | 0.0002  | 125 | 132 | 0 | 54.43  | 28 |
| 1864.0419 | 2 | 1864.0418 | 0.0002  | 68  | 84  | 0 | 102.1  | 31 |
| 2080.9247 | 3 | 2080.9273 | -0.0026 | 107 | 124 | 0 | 48.62  | 34 |
| 2176.0288 | 2 | 2176.0293 | -0.0004 | 140 | 159 | 0 | 58.17  | 37 |
| 1154.6403 | 2 | 1154.6408 | -0.0004 | 192 | 203 | 0 | 57.38  | 33 |
| 1295.6138 | 2 | 1295.6146 | -0.0007 | 333 | 342 | 0 | 43.68  | 37 |
| 1493.7148 | 2 | 1493.7151 | -0.0002 | 68  | 80  | 0 | 70.4   | 37 |
| 1563.8193 | 2 | 1563.8218 | -0.0025 | 145 | 158 | 0 | 42.26  | 37 |
| 2052.003  | 2 | 2052.0052 | -0.0021 | 313 | 330 | 0 | 92.62  | 38 |
| 770.4399  | 2 | 770.4399  | 0       | 346 | 353 | 0 | 60.61  | 32 |
| 916.5742  | 2 | 916.5746  | -0.0003 | 367 | 374 | 0 | 55.75  | 26 |
| 1065.4877 | 2 | 1065.488  | -0.0003 | 137 | 145 | 0 | 37.41  | 36 |
| 1359.7048 | 2 | 1359.7068 | -0.0019 | 106 | 116 | 0 | 52.26  | 38 |
| 1407.7145 | 3 | 1407.7147 | -0.0002 | 134 | 145 | 1 | 41.95  | 38 |
| 1445.7354 | 2 | 1445.7343 | 0.0011  | 154 | 165 | 0 | 49.21  | 38 |
| 2047.0094 | 2 | 2047.0085 | 0.001   | 76  | 95  | 0 | 63.53  | 37 |
| 975.441   | 2 | 975.441   | 0       | 21  | 30  | 0 | 59.64  | 33 |
| 1131.519  | 2 | 1131.5197 | -0.0007 | 199 | 208 | 0 | 41.19  | 34 |
| 1143.5517 | 2 | 1143.5529 | -0.0012 | 42  | 52  | 0 | 37.14  | 35 |
| 1197.6981 | 2 | 1197.6982 | -0.0001 | 31  | 41  | 1 | 55.5   | 33 |
| 1514.7414 | 2 | 1514.7419 | -0.0005 | 87  | 97  | 0 | 38.17  | 37 |
| 1789.8832 | 2 | 1789.8846 | -0.0014 | 241 | 256 | 0 | 54.65  | 38 |
| 3150.6331 | 3 | 3150.635  | -0.0019 | 150 | 179 | 0 | 79.14  | 34 |
| 770.4399  | 2 | 770.4399  | 0       | 350 | 357 | 0 | 60.61  | 32 |
| 916.5742  | 2 | 916.5746  | -0.0003 | 371 | 378 | 0 | 55.75  | 26 |
| 1031.5038 | 2 | 1031.5036 | 0.0002  | 141 | 149 | 0 | 45.48  | 37 |
| 1227.6128 | 2 | 1227.6136 | -0.0008 | 330 | 340 | 0 | 59.59  | 36 |
| 1359.7048 | 2 | 1359.7068 | -0.0019 | 110 | 120 | 0 | 52.26  | 38 |
| 1401.736  | 3 | 1401.7365 | -0.0004 | 138 | 149 | 1 | 47.93  | 38 |
| 1445.7354 | 2 | 1445.7343 | 0.0011  | 158 | 169 | 0 | 49.21  | 38 |
| 1130.4627 | 2 | 1130.4629 | -0.0001 | 584 | 594 | 0 | 64.38  | 28 |
| 1158.494  | 2 | 1158.4942 | -0.0002 | 602 | 613 | 0 | 34.49  | 30 |
| 1186.6956 | 2 | 1186.6962 | -0.0006 | 155 | 165 | 0 | 46.11  | 33 |
| 1260.6718 | 2 | 1260.6714 | 0.0005  | 471 | 481 | 0 | 40.88  | 38 |
| 1499.6771 | 3 | 1499.6787 | -0.0016 | 375 | 387 | 0 | 42.61  | 35 |
| 1814.903  | 2 | 1814.905  | -0.0021 | 319 | 335 | 0 | 82.11  | 37 |
| 709.3873  | 2 | 709.3871  | 0.0002  | 171 | 176 | 0 | 34.68  | 32 |
| 1277.6175 | 2 | 1277.6187 | -0.0012 | 348 | 358 | 0 | 76.27  | 38 |
| 1900.9364 | 2 | 1900.9386 | -0.0022 | 268 | 285 | 0 | 84.32  | 37 |
| 3356.575  | 3 | 3356.5772 | -0.0022 | 193 | 222 | 0 | 55.82  | 35 |
| 1154.6403 | 2 | 1154.6408 | -0.0004 | 192 | 203 | 0 | 57.38  | 33 |
| 1295.6138 | 2 | 1295.6146 | -0.0007 | 333 | 342 | 0 | 43.68  | 37 |
| 1493.7148 | 2 | 1493.7151 | -0.0002 | 68  | 80  | 0 | 70.4   | 37 |
| 1563.8193 | 2 | 1563.8218 | -0.0025 | 145 | 158 | 0 | 42.26  | 37 |
| 2018.0204 | 2 | 2018.0208 | -0.0004 | 313 | 330 | 0 | 84.49  | 38 |
| 1800.7848 | 2 | 1800.7861 | -0.0013 | 62  | 80  | 0 | 104.76 | 32 |
| 2851.4942 | 3 | 2851.4967 | -0.0025 | 227 | 253 | 0 | 59.06  | 34 |
| 2955.4516 | 3 | 2955.4502 | 0.0014  | 254 | 281 | 0 | 52.73  | 36 |
| 974.5549  | 2 | 974.5549  | 0       | 227 | 237 | 0 | 37.6   | 36 |
| 1424.7668 | 2 | 1424.7664 | 0.0004  | 309 | 321 | 0 | 64.27  | 35 |
| 1456.8323 | 2 | 1456.8323 | 0       | 238 | 250 | 0 | 64.45  | 33 |
| 1491.7677 | 2 | 1491.7681 | -0.0005 | 338 | 351 | 0 | 87.82  | 38 |
| 1507.7599 | 2 | 1507.7592 | 0.0007  | 212 | 224 | 0 | 49.15  | 38 |
| 1945.051  | 2 | 1945.052  | -0.001  | 479 | 498 | 0 | 137.76 | 35 |
| 978.4657  | 2 | 978.4672  | -0.0015 | 365 | 373 | 0 | 53.25  | 36 |
| 1205.5991 | 2 | 1205.604  | -0.0049 | 61  | 70  | 0 | 80.25  | 38 |
| 1469.7251 | 2 | 1469.7258 | -0.0008 | 48  | 60  | 0 | 85.57  | 37 |

|           |   |           |         |      |      |   |        |    |
|-----------|---|-----------|---------|------|------|---|--------|----|
| 1157.6431 | 2 | 1157.6445 | -0.0014 | 175  | 186  | 0 | 41.55  | 37 |
| 1272.6326 | 2 | 1272.635  | -0.0024 | 329  | 339  | 0 | 73.99  | 37 |
| 1275.6831 | 2 | 1275.6823 | 0.0009  | 192  | 203  | 0 | 47.5   | 37 |
| 1935.962  | 2 | 1935.9612 | 0.0008  | 262  | 278  | 0 | 50.49  | 38 |
| 3243.5488 | 3 | 3243.5506 | -0.0019 | 120  | 149  | 0 | 65.63  | 36 |
| 1354.6538 | 2 | 1353.6598 | 0.994   | 95   | 106  | 0 | 72.78  | 37 |
| 2084.0582 | 2 | 2084.0572 | 0.0011  | 56   | 75   | 0 | 106.5  | 37 |
| 1686.8792 | 2 | 1686.8788 | 0.0003  | 749  | 764  | 0 | 112.41 | 37 |
| 1836.8992 | 2 | 1836.9006 | -0.0014 | 912  | 928  | 0 | 68.9   | 38 |
| 869.5333  | 2 | 869.5334  | -0.0001 | 236  | 243  | 0 | 50.11  | 30 |
| 914.4807  | 2 | 914.4821  | -0.0014 | 389  | 396  | 0 | 36.23  | 34 |
| 1009.5914 | 2 | 1009.592  | -0.0007 | 417  | 425  | 0 | 38.24  | 29 |
| 1460.7624 | 2 | 1460.7623 | 0.0001  | 185  | 197  | 0 | 93.65  | 38 |
| 1578.802  | 2 | 1578.8042 | -0.0022 | 133  | 146  | 0 | 62.44  | 38 |
| 1157.6431 | 2 | 1157.6445 | -0.0014 | 206  | 217  | 0 | 41.55  | 37 |
| 1643.8696 | 2 | 1643.8705 | -0.0009 | 235  | 250  | 0 | 41.94  | 37 |
| 1885.8947 | 2 | 1885.8945 | 0.0002  | 140  | 155  | 0 | 46.37  | 37 |
| 1966.9297 | 2 | 1966.9306 | -0.0009 | 293  | 309  | 0 | 116.69 | 37 |
| 1255.6878 | 2 | 1255.6884 | -0.0006 | 88   | 99   | 0 | 53.12  | 35 |
| 1290.6274 | 2 | 1290.6303 | -0.0029 | 34   | 45   | 0 | 50.43  | 37 |
| 1526.7932 | 2 | 1526.794  | -0.0008 | 358  | 371  | 0 | 88     | 36 |
| 1582.7834 | 3 | 1582.7839 | -0.0005 | 441  | 454  | 1 | 46.11  | 37 |
| 1287.6606 | 2 | 1287.6605 | 0.0001  | 95   | 106  | 0 | 78.6   | 37 |
| 1422.6607 | 2 | 1422.6627 | -0.002  | 28   | 40   | 0 | 79.25  | 36 |
| 1524.8998 | 2 | 1524.8988 | 0.001   | 1069 | 1083 | 0 | 71.78  | 29 |
| 1940.0522 | 2 | 1940.052  | 0.0002  | 810  | 827  | 0 | 92.26  | 34 |
| 999.5696  | 2 | 999.5713  | -0.0017 | 268  | 276  | 0 | 47.95  | 36 |
| 1284.7108 | 2 | 1284.7112 | -0.0004 | 177  | 188  | 0 | 50.57  | 36 |
| 1414.7559 | 2 | 1414.7569 | -0.001  | 254  | 267  | 0 | 103.97 | 37 |
| 897.4917  | 2 | 897.492   | -0.0003 | 24   | 31   | 0 | 41.73  | 33 |
| 1169.597  | 2 | 1169.5968 | 0.0002  | 178  | 187  | 0 | 54.26  | 35 |
| 1581.8471 | 2 | 1581.8475 | -0.0004 | 75   | 89   | 0 | 68.03  | 35 |
| 1791.8936 | 3 | 1791.8944 | -0.0009 | 97   | 113  | 0 | 53.92  | 37 |
| 1498.8285 | 2 | 1498.8296 | -0.0011 | 2051 | 2062 | 0 | 50.34  | 35 |
| 1557.8877 | 2 | 1557.8878 | -0.0001 | 1244 | 1257 | 0 | 44.71  | 32 |
| 1578.697  | 2 | 1578.6984 | -0.0014 | 1940 | 1952 | 0 | 55.48  | 34 |
| 1713.8263 | 2 | 1713.8284 | -0.002  | 1714 | 1728 | 0 | 56.62  | 37 |
| 1256.733  | 2 | 1256.734  | -0.001  | 84   | 95   | 0 | 92.22  | 33 |
| 1383.7031 | 2 | 1383.7034 | -0.0003 | 26   | 37   | 0 | 66.3   | 37 |
| 1018.5026 | 2 | 1018.5043 | -0.0018 | 805  | 815  | 0 | 97.03  | 39 |
| 1461.7613 | 2 | 1461.7616 | -0.0003 | 683  | 694  | 0 | 56.94  | 38 |
| 1835.9328 | 2 | 1835.9339 | -0.001  | 112  | 127  | 0 | 44.54  | 38 |
| 1157.6431 | 2 | 1157.6445 | -0.0014 | 197  | 208  | 0 | 41.55  | 37 |
| 1324.6278 | 2 | 1324.6268 | 0.001   | 374  | 385  | 0 | 39.61  | 37 |
| 1478.8545 | 3 | 1478.8569 | -0.0024 | 311  | 323  | 1 | 46.83  | 30 |
| 1921.9453 | 2 | 1921.9455 | -0.0002 | 285  | 301  | 0 | 81.47  | 38 |
| 1446.8108 | 2 | 1446.8082 | 0.0026  | 330  | 343  | 0 | 68.7   | 34 |
| 1889.9837 | 2 | 1889.9847 | -0.0009 | 440  | 458  | 0 | 75.97  | 37 |
| 1255.6449 | 2 | 1255.6448 | 0       | 589  | 598  | 0 | 55.72  | 35 |
| 1664.8413 | 2 | 1664.841  | 0.0004  | 677  | 692  | 0 | 89.31  | 37 |
| 1159.6199 | 2 | 1159.6197 | 0.0002  | 50   | 61   | 0 | 84.95  | 38 |
| 1165.5953 | 2 | 1165.5979 | -0.0026 | 66   | 76   | 0 | 60.74  | 37 |
| 1403.6519 | 2 | 1403.6528 | -0.0009 | 441  | 453  | 0 | 88.69  | 35 |
| 2222.173  | 2 | 2222.1736 | -0.0005 | 96   | 115  | 0 | 45.44  | 35 |
| 1844.999  | 2 | 1844.9996 | -0.0005 | 246  | 261  | 0 | 81.25  | 35 |
| 1945.948  | 2 | 1945.9495 | -0.0015 | 165  | 181  | 0 | 53.2   | 37 |
| 1547.8818 | 2 | 1547.881  | 0.0007  | 139  | 152  | 0 | 59.84  | 31 |
| 1960.9691 | 3 | 1960.9676 | 0.0015  | 318  | 333  | 0 | 51.09  | 37 |

|           |   |           |         |      |      |   |       |    |
|-----------|---|-----------|---------|------|------|---|-------|----|
| 2095.1662 | 3 | 2095.1677 | -0.0015 | 341  | 359  | 0 | 52.84 | 31 |
| 1729.8326 | 2 | 1729.8271 | 0.0055  | 517  | 532  | 0 | 64.95 | 37 |
| 2642.3441 | 3 | 2641.3347 | 1.0093  | 131  | 154  | 0 | 68.28 | 37 |
| 1053.5543 | 2 | 1053.5567 | -0.0024 | 106  | 116  | 0 | 70.39 | 35 |
| 1442.7236 | 2 | 1442.7253 | -0.0016 | 128  | 140  | 0 | 67.6  | 37 |
| 1180.6919 | 2 | 1180.6928 | -0.0009 | 129  | 139  | 0 | 52.44 | 30 |
| 1384.7918 | 2 | 1384.7926 | -0.0008 | 78   | 90   | 0 | 78.74 | 34 |
| 1402.8589 | 2 | 1402.8588 | 0.0001  | 562  | 574  | 0 | 46.59 | 20 |
| 1564.9006 | 2 | 1564.9011 | -0.0005 | 671  | 685  | 0 | 52.6  | 29 |
| 2111.042  | 2 | 2111.0436 | -0.0016 | 368  | 387  | 0 | 38.63 | 37 |
| 1198.6558 | 2 | 1198.6557 | 0       | 286  | 296  | 0 | 62.23 | 35 |
| 1279.7601 | 2 | 1279.7612 | -0.0011 | 161  | 173  | 0 | 62.9  | 28 |
| 1052.5379 | 2 | 1051.5298 | 1.0081  | 232  | 241  | 0 | 40.03 | 35 |
| 1434.735  | 2 | 1434.7354 | -0.0005 | 1132 | 1144 | 0 | 82.33 | 38 |
| 1279.7865 | 2 | 1279.7864 | 0.0001  | 802  | 814  | 0 | 47.89 | 24 |
| 2336.154  | 2 | 2336.1536 | 0.0005  | 1401 | 1421 | 0 | 67.82 | 38 |
| 1212.5551 | 2 | 1212.5557 | -0.0006 | 153  | 162  | 0 | 58.9  | 35 |
| 1618.8822 | 2 | 1618.8831 | -0.0009 | 200  | 213  | 0 | 64.77 | 35 |
| 754.5059  | 2 | 754.5065  | -0.0006 | 102  | 107  | 0 | 41.8  | 20 |
| 773.5164  | 2 | 773.5163  | 0       | 83   | 88   | 0 | 43.1  | 22 |
| 1505.7668 | 2 | 1505.7667 | 0.0001  | 197  | 208  | 0 | 53.34 | 38 |
| 1188.6333 | 2 | 1188.635  | -0.0017 | 182  | 194  | 0 | 62.53 | 38 |
| 1351.6346 | 2 | 1351.6368 | -0.0021 | 331  | 342  | 0 | 57.53 | 37 |
| 1248.6108 | 2 | 1248.6132 | -0.0024 | 135  | 146  | 0 | 76.4  | 38 |
| 2443.3869 | 3 | 2443.3872 | -0.0004 | 7    | 29   | 0 | 36.83 | 27 |
| 1247.5814 | 2 | 1247.5816 | -0.0001 | 579  | 589  | 0 | 39.55 | 36 |
| 1438.702  | 2 | 1438.7013 | 0.0007  | 709  | 720  | 0 | 60.91 | 37 |
| 2488.3155 | 3 | 2488.3173 | -0.0018 | 385  | 407  | 0 | 48.27 | 35 |
| 1361.7376 | 2 | 1361.7377 | -0.0001 | 1194 | 1205 | 0 | 47.74 | 36 |
| 2048.0986 | 2 | 2048.0983 | 0.0004  | 957  | 974  | 0 | 62.99 | 35 |
| 1087.5708 | 2 | 1087.5696 | 0.0012  | 377  | 386  | 0 | 38.48 | 38 |
| 1241.6287 | 2 | 1241.6292 | -0.0005 | 412  | 422  | 0 | 70.88 | 36 |
| 1145.604  | 2 | 1145.604  | 0       | 50   | 61   | 0 | 49.82 | 39 |
| 1165.5953 | 2 | 1165.5979 | -0.0026 | 66   | 76   | 0 | 60.74 | 37 |
| 956.5539  | 2 | 956.5542  | -0.0003 | 126  | 133  | 0 | 39.14 | 34 |
| 1044.4693 | 2 | 1044.4699 | -0.0006 | 208  | 216  | 0 | 44.43 | 31 |
| 1144.5899 | 2 | 1144.591  | -0.0011 | 134  | 142  | 0 | 43.68 | 37 |
| 1042.5565 | 2 | 1042.556  | 0.0006  | 669  | 677  | 0 | 42.42 | 36 |
| 1362.7907 | 2 | 1362.7911 | -0.0004 | 68   | 79   | 0 | 53.44 | 30 |
| 1312.6366 | 2 | 1312.6299 | 0.0067  | 78   | 89   | 0 | 38.87 | 36 |
| 1464.7736 | 2 | 1464.7725 | 0.0011  | 95   | 106  | 0 | 52.94 | 37 |
| 1157.6431 | 2 | 1157.6445 | -0.0014 | 191  | 202  | 0 | 41.55 | 37 |
| 2028.0518 | 2 | 2028.0527 | -0.0009 | 246  | 264  | 0 | 52.84 | 37 |
| 1170.5302 | 2 | 1170.5305 | -0.0003 | 540  | 549  | 0 | 34.32 | 34 |
| 1713.7961 | 2 | 1713.7973 | -0.0012 | 480  | 493  | 0 | 42.75 | 36 |
| 1267.6196 | 2 | 1267.6197 | -0.0001 | 135  | 145  | 0 | 38.88 | 37 |
| 1467.8601 | 3 | 1467.8595 | 0.0006  | 38   | 49   | 1 | 38.84 | 29 |

low.

; **pep\_rank**: rank of the peptide match, 1  
articular query listed under the highest  
**nr**: experimental relative molecular mass;  
reshold; **pep\_expect**: expectation value  
**mod\_pos**: position of variable modifications

| pep_expect | pep_res_befc | pep_seq      | pep_res_afte | pep_var_moc     | pep_var_mod_pos                     |
|------------|--------------|--------------|--------------|-----------------|-------------------------------------|
| 2.20E-05   | R            | YLTASAMFR    | G            |                 |                                     |
| 6.60E-06   | K            | LAVNLIPFPR   | L            |                 |                                     |
| 5.00E-05   | R            | FPGQLNSDLR   | K            |                 |                                     |
| 2.50E-06   | R            | VSEQFTAMFR   | R            | Oxidation (M)   | 0.0000000200.0                      |
| 0.0015     | K            | STVCDIPPTGL  | M            |                 |                                     |
| 5.30E-08   | R            | YTGDSLQLEFI  |              |                 |                                     |
| 5.30E-07   | R            | MMLTFSVFPS   | V            |                 |                                     |
| 1.20E-09   | R            | INVYYNEASCC  | F            |                 |                                     |
| 3.30E-06   | K            | EVDEQMLNVGN  |              |                 |                                     |
| 2.60E-08   | R            | LHFFMVGAFAP  | G            | Oxidation (M)   | 0.00002000000000.0                  |
| 9.20E-07   | R            | AVLMDLEPGT   | S            | 2 Oxidation (M) | 0.000200000020000.0                 |
| 4.10E-06   | K            | NSSYFVEWIPIS |              |                 |                                     |
| 3.20E-06   | R            | SLTVPELTQQMN |              | Oxidation (M)   | 0.00000000020000.0                  |
| 8.20E-11   | R            | EILHIQGGQCC  | F            |                 |                                     |
| 2.80E-09   | K            | FWEVCAEHCY   |              |                 |                                     |
| 1.00E-13   | K            | MASTFIGNSTSR |              | 2 Oxidation (M) | 0.2000000000000200.0                |
| 3.80E-13   | K            | GHYTEGAELID  | K            |                 |                                     |
| 1.50E-05   | K            | GHYTEGAELID  | E            |                 |                                     |
| 0.0019     | -            | MREILHIQGGCF |              | Oxidation (M)   | 0.200000000000000000.0              |
| 1.90E-05   | K            | LTPSPGDLNIF  |              | Oxidation (M)   | 0.000000000000000200000000.0        |
| 7.80E-08   | R            | SGPYGQTFRPIG |              |                 |                                     |
| 0.00015    | K            | EAENCDCLQGI  |              | Oxidation (M)   | 0.000000000000000000020000000 emPAI |
| 9.80E-07   | K            | SSVCDIAPK    | G            |                 |                                     |
| 4.10E-07   | R            | YLTASAVFR    | G            |                 |                                     |
| 6.60E-06   | K            | LAVNLIPFPR   | L            |                 |                                     |
| 5.00E-05   | R            | FPGQLNSDLR   | K            |                 |                                     |
| 2.50E-06   | R            | VSEQFTAMFR   | R            | Oxidation (M)   | 0.0000000200.0                      |
| 3.00E-08   | R            | IDVYFNEASGCY |              |                 |                                     |
| 1.70E-07   | R            | MMMTFSVFPV   |              | Oxidation (M)   | 0.020000000000.0                    |
| 3.70E-07   | K            | EVDEQMMNIIN  |              | Oxidation (M)   | 0.00000200000.0                     |
| 2.60E-08   | R            | LHFFMVGAFAP  | G            | Oxidation (M)   | 0.00002000000000.0                  |
| 9.20E-07   | R            | AVLMDLEPGT   | S            | 2 Oxidation (M) | 0.000200000020000.0                 |
| 4.10E-06   | K            | NSSYFVEWIPIS |              |                 |                                     |
| 8.20E-11   | R            | EILHIQGGQCC  | F            |                 |                                     |
| 1.00E-13   | K            | MASTFIGNSTSR |              | 2 Oxidation (M) | 0.2000000000000200.0                |
| 3.80E-13   | K            | GHYTEGAELID  | K            |                 |                                     |
| 1.50E-05   | K            | GHYTEGAELID  | E            |                 |                                     |
| 0.0019     | -            | MREILHIQGGCF |              | Oxidation (M)   | 0.200000000000000000.0              |
| 0.0007     | R            | GSQQYSALSVIN |              |                 |                                     |
| 3.60E-07   | K            | LANPTFGDLNIF |              | Oxidation (M)   | 0.000000000000000200000000.0        |
| 9.80E-06   | R            | SGPFGQIFRPG  | G            |                 |                                     |
| 1.50E-08   | K            | FWEVICDEHG   | I            |                 | emPAI                               |
| 2.20E-05   | R            | YLTASAMFR    | G            |                 |                                     |
| 6.60E-06   | K            | LAVNLIPFPR   | L            |                 |                                     |
| 5.00E-05   | R            | FPGQLNSDLR   | K            |                 |                                     |
| 2.50E-06   | R            | VSEQFTAMFR   | R            | Oxidation (M)   | 0.0000000200.0                      |
| 0.0015     | K            | STVCDIPPTGL  | M            |                 |                                     |
| 5.30E-07   | R            | MMLTFSVFPS   | V            |                 |                                     |

|            |                |                                                       |
|------------|----------------|-------------------------------------------------------|
| 2.60E-08 R | VNVYYNEASC F   |                                                       |
| 3.30E-06 K | EVDEQMINVC N   |                                                       |
| 2.60E-08 R | LHFFMVGFP G    | Oxidation (M) 0.00002000000000.0                      |
| 3.00E-06 R | AVLMDLEPGT S   | 2 Oxidation (M) 0.000200000020000.0                   |
| 4.10E-06 K | NSSYFVEWIP S   |                                                       |
| 8.20E-11 R | EILHIQGGQCC F  |                                                       |
| 1.00E-13 K | MASTFIGNST S R | 2 Oxidation (M) 0.20000000000000200.0                 |
| 3.80E-13 K | GHYTEGAELIC K  |                                                       |
| 1.50E-05 K | GHYTEGAELIC E  |                                                       |
| 0.0019 -   | MREILHIQGGC F  | Oxidation (M) 0.200000000000000000.0                  |
| 1.90E-05 K | LTPPSFGDLN F   | Oxidation (M) 0.000000000000000020000000.0            |
| 1.00E-07 R | SGPYGQIFRPE G  |                                                       |
| 0.00015 K  | EAENCDCLQG I   | Oxidation (M) 0.000000000000000000000020000000 emPAI  |
| 2.20E-05 R | YLTASAMFR G    |                                                       |
| 6.60E-06 K | LAVNLIPFPR L   |                                                       |
| 5.00E-05 R | FPGQLNSDLR K   |                                                       |
| 2.50E-06 R | VSEQFTAMFR R   | Oxidation (M) 0.0000000200.0                          |
| 0.0015 K   | STVCDIPPTGL M  |                                                       |
| 0.00044 R  | YVGDELQLEF V   |                                                       |
| 1.70E-07 R | MMMTFSVFP V    | Oxidation (M) 0.020000000000.0                        |
| 2.60E-08 R | VNVYYNEASC Y   |                                                       |
| 3.30E-06 K | EVDEQMLNV C N  |                                                       |
| 2.60E-08 R | LHFFMVGFP G    | Oxidation (M) 0.00002000000000.0                      |
| 3.00E-06 R | AVLMDLEPGT S   | 2 Oxidation (M) 0.000200000020000.0                   |
| 4.10E-06 K | NSSYFVEWIP S   |                                                       |
| 7.30E-11 K | FWEVNVLEHC Y   |                                                       |
| 1.00E-13 K | MASTFIGNST S R | 2 Oxidation (M) 0.20000000000000200.0                 |
| 3.80E-13 K | GHYTEGAELIC K  |                                                       |
| 1.50E-05 K | GHYTEGAELIC E  |                                                       |
| 0.0049 K   | LSTPSFGDLN F   |                                                       |
| 1.00E-07 R | SGPYGQIFRPE G  |                                                       |
| 0.00015 K  | EAENCDCLQG I   | Oxidation (M) 0.000000000000000000000020000000 emPAI  |
| 0.0022 R   | TKDNNLLGK F    |                                                       |
| 4.90E-07 K | DAGVIAGLNV I   |                                                       |
| 0.00086 R  | VEIANDQGNIT    |                                                       |
| 0.0017 R   | MVNHVFQEFIR    | Oxidation (M) 0.2000000000.0                          |
| 1.70E-06 R | FEELNMDLFR K   | Oxidation (M) 0.0000020000.0                          |
| 5.00E-06 K | NALENYAYNV N   |                                                       |
| 9.50E-05 K | ELESICNPIAK M  |                                                       |
| 5.20E-06 K | STVHDVVLVG I   |                                                       |
| 0.00012 K  | VQQLLQDFFN E   |                                                       |
| 6.00E-06 R | TTPSYVAFTDS L  |                                                       |
| 3.50E-05 R | ARFEELNMDL K   |                                                       |
| 4.90E-08 K | EFAAEEISSMV M  |                                                       |
| 1.10E-09 K | NQVAMNPVN R    | Oxidation (M) 0.00002000000000.0                      |
| 7.10E-09 K | ATAGDTHLGG M   |                                                       |
| 0.0032 K   | NAVVTVPAYFI Q  |                                                       |
| 9.50E-13 K | SINPDEAVAYC V  |                                                       |
| 7.90E-05 K | GEGPAIGIDL G V |                                                       |
| 2.60E-09 K | EQVFSTYSDN C A |                                                       |
| 2.60E-08 K | MYQGAGGEA I    | 2 Oxidation (M) 0.200000000000000020000000000000.0    |
| 0.00021 R  | TLSSAQTTIEI A  |                                                       |
| 0.0077 K   | VQDLLLDVTF N   | Oxidation (M) 0.00000000000000000000002000000.0 emPAI |
| 0.0033 R   | ALGDYQGVK V    |                                                       |
| 0.00055 R  | ELAQQIEK V     |                                                       |
| 0.0069 R   | DELTLEGIK Q    |                                                       |
| 1.90E-07 R | VLITDLLAR G    |                                                       |
| 2.50E-05 K | VHACVGGTSV E   |                                                       |

|            |                |                                             |       |
|------------|----------------|---------------------------------------------|-------|
| 0.00025 K  | RDELTLEGIK Q   |                                             |       |
| 5.40E-10 K | GLDVIQQAQS T   |                                             |       |
| 8.00E-08 K | GVAINFVTLDI M  |                                             |       |
| 1.60E-09 R | ILQAGVHVVVV V  |                                             |       |
| 1.40E-09 R | KGVAINFVTLI M  |                                             |       |
| 4.70E-09 K | MFVLDEADEN G   | 2 Oxidation (N 0.2000000002000.0            |       |
| 0.0015 R   | DHTVSATHGDC D  |                                             |       |
| 1.50E-09 R | GIYAYGFEKPS G  |                                             |       |
| 8.20E-06 K | FYNVVVEELPS -  |                                             |       |
| 1.10E-06 R | SRDHTVSATHI D  |                                             |       |
| 4.30E-10 K | IQVGVFSATM K   |                                             |       |
| 7.50E-10 R | GIDVQQVSLVI I  |                                             |       |
| 5.70E-05 K | TATFCSGVLQCE   |                                             | emPAI |
| 0.008 K    | FDLMYAK R      | Oxidation (M) 0.0002000.0                   |       |
| 5.90E-06 K | DVNAAVGTIK T   |                                             |       |
| 0.0015 K   | YMACCLMYR G    | Oxidation (M) 0.000000200.0                 |       |
| 5.70E-09 R | LVSQVISSLTAF F |                                             |       |
| 1.10E-05 R | TIQFVDWCPT C   |                                             |       |
| 2.20E-06 R | SLNIERPTYTNL L |                                             |       |
| 4.90E-08 R | AVFVDLEPTVI T  |                                             |       |
| 8.30E-08 R | IHFMLSSYAPV A  |                                             |       |
| 2.00E-09 R | AVCMISNSTSI I  |                                             |       |
| 7.00E-06 K | CGINYQPPTVV V  |                                             |       |
| 6.90E-12 K | TVGGGDDAFH H   |                                             |       |
| 0.00012 R  | AFVHWYVGECE    | Oxidation (M) 0.0000000000200000000.0       |       |
| 6.80E-07 R | QLFHPEQLISG G  |                                             |       |
| 9.70E-08 R | FDGALNVDVT I   |                                             |       |
| 6.30E-06 K | AFHEQLSVAEI C  | 2 Oxidation (N 0.000000000000000000002200.0 |       |
| 3.10E-07 K | LADNCTGLQGL L  |                                             | emPAI |
| 0.008 K    | FDLMYAK R      | Oxidation (M) 0.0002000.0                   |       |
| 5.90E-06 K | DVNAAVGTIK T   |                                             |       |
| 0.0015 K   | YMACCLMYR G    | Oxidation (M) 0.000000200.0                 |       |
| 5.70E-09 R | LVSQVISSLTAF F |                                             |       |
| 1.10E-05 R | TIQFVDWCPT C   |                                             |       |
| 0.0012 R   | SLSIERPTYTNL L |                                             |       |
| 4.90E-08 R | AVFVDLEPTVI T  |                                             |       |
| 8.30E-08 R | IHFMLSSYAPV A  |                                             |       |
| 2.00E-09 R | AVCMISNSTSI I  |                                             |       |
| 7.00E-06 K | CGINYQPPTVV V  |                                             |       |
| 6.90E-12 K | TVGGGDDAFH H   |                                             |       |
| 0.00012 R  | AFVHWYVGECE    | Oxidation (M) 0.0000000000200000000.0       |       |
| 6.80E-07 R | QLFHPEQLISG G  |                                             |       |
| 9.70E-08 R | FDGALNVDVT I   |                                             |       |
| 6.30E-06 K | AFHEQLSVAEI C  | 2 Oxidation (N 0.000000000000000000002200.0 |       |
| 3.10E-07 K | LADNCTGLQGL L  |                                             | emPAI |
| 0.00011 R  | ALGDYLGVK V    |                                             |       |
| 0.00055 R  | ELAQQIEK V     |                                             |       |
| 1.50E-05 K | GVAINFVTR D    |                                             |       |
| 0.0069 R   | DELTLEGIK Q    |                                             |       |
| 0.00044 R  | KGVAINFVTR D   |                                             |       |
| 1.90E-07 R | VLITDLLAR G    |                                             |       |
| 2.50E-05 K | VHACVGGTSV E   |                                             |       |
| 0.00025 K  | RDELTLEGIK Q   |                                             |       |
| 5.40E-10 K | GLDVIQQAQS T   |                                             |       |
| 1.60E-09 R | ILQAGVHVVVV V  |                                             |       |
| 4.70E-09 K | MFVLDEADEN G   | 2 Oxidation (N 0.2000000002000.0            |       |
| 0.0015 R   | DHTVSATHGDC D  |                                             |       |
| 1.50E-09 R | GIYAYGFEKPS G  |                                             |       |

|          |   |               |                                              |
|----------|---|---------------|----------------------------------------------|
| 8.20E-06 | K | FYNVVVEELPS-  |                                              |
| 1.10E-06 | R | SRDHTVSATHD   |                                              |
| 4.30E-10 | K | IQVGVFSATM    |                                              |
| 7.50E-10 | R | GIDVQQVSLVLI  |                                              |
| 0.0022   | R | TKDNNLLGK     |                                              |
| 4.90E-07 | K | DAGVIAGLNV    |                                              |
| 3.00E-05 | R | FTDSSVQSDIK   |                                              |
| 0.00086  | R | VEIANDQGNIT   |                                              |
| 0.0017   | R | MVNHFVQEFIR   | Oxidation (M) 0.2000000000.0                 |
| 0.00016  | R | FEELNIDLFR    |                                              |
| 3.60E-06 | R | EIAEAYLGTTIK  |                                              |
| 5.00E-06 | K | NALENYAYNVN   |                                              |
| 9.50E-05 | K | ELESICNPIIAK  |                                              |
| 2.00E-06 | K | VQQLLVDFFN    |                                              |
| 5.70E-10 | K | NSIDDVVLVGC   |                                              |
| 6.00E-06 | R | TTPSYVAFTDSL  |                                              |
| 0.0005   | R | ARFEELNIDLFIK |                                              |
| 7.10E-09 | K | ATAGDTHLGGM   |                                              |
| 2.70E-09 | K | NQVAMNPINR    | Oxidation (M) 0.000020000000000.0            |
| 0.0032   | K | NAVVTVPAYFIQ  |                                              |
| 2.20E-10 | K | SINPDEAVAYCV  |                                              |
| 7.90E-05 | K | GEGPAIGIDLGV  |                                              |
| 2.60E-09 | K | EQVFSTYSDNCA  |                                              |
| 7.60E-10 | R | TLSSTAQTTIEIA | emPAI                                        |
| 0.0073   | K | VDTAFIVK      |                                              |
| 0.004    | R | INAEDPFK      |                                              |
| 0.0039   | K | LIVWAPTR      |                                              |
| 5.60E-05 | K | LILDVEDFK     |                                              |
| 6.00E-05 | K | FGNVVHFGERD   |                                              |
| 0.00027  | R | YKQEDIVLR     |                                              |
| 0.0026   | R | HIEFQVLADK    |                                              |
| 9.70E-06 | R | VANEIGFPVMA   | Oxidation (M) 0.000000000200.0               |
| 6.50E-06 | R | GSFYFMEMNTI   |                                              |
| 0.0077   | R | ITSYLPSSGGPFM |                                              |
| 1.70E-06 | K | LLEEAPSPALTK  |                                              |
| 7.70E-05 | R | DHGINFIGPNFV  |                                              |
| 6.70E-11 | K | SEAAAAFGNDF   |                                              |
| 3.10E-10 | K | HEEELAEPQEI   |                                              |
| 5.00E-06 | R | ALNDTIITGVP   |                                              |
| 9.00E-08 | K | NAGVPTVPGSV   |                                              |
| 4.50E-08 | R | IQVEHPVTEMV   |                                              |
| 7.70E-05 | R | GCTMLHPGYCD   | Oxidation (M) 0.0002000000000000000000.0     |
| 4.10E-05 | K | AMGDAAVAA     | Oxidation (M) 0.02000000000000000000000000.0 |
| 5.50E-06 | K | LADEAVCIGEA   | emPAI                                        |
| 0.0029   | K | SSVCDIAPR     |                                              |
| 2.20E-05 | R | YLTASAMFR     |                                              |
| 6.60E-06 | K | LAVNLIPFPR    |                                              |
| 5.00E-05 | R | FPGQLNSDLR    |                                              |
| 2.50E-06 | R | VSEQFTAMFR    | Oxidation (M) 0.0000000200.0                 |
| 5.10E-06 | R | YVGNSDLQLEIV  |                                              |
| 5.30E-07 | R | MMLTFSVFPS    |                                              |
| 2.60E-08 | R | VNVYYNEASCY   |                                              |
| 3.30E-06 | K | EVDEQMINVN    |                                              |
| 2.60E-08 | R | LHFFMVGAFAP   | Oxidation (M) 0.00002000000000.0             |
| 4.10E-06 | K | NSSYFVEWIP    |                                              |
| 7.80E-05 | K | GHYTEGAELIK   |                                              |
| 1.90E-05 | K | LTTPSFGDLNF   | Oxidation (M) 0.0000000000000000200000000.0  |
| 0.0073   | R | TGPYGQIFRPIG  |                                              |

|            |                |                                                   |       |
|------------|----------------|---------------------------------------------------|-------|
| 0.00015 K  | EAENCDCQLG I   | Oxidation (M) 0.000000000000000000000000020000000 | emPAI |
| 0.0022 R   | TKDNLLGK F     |                                                   |       |
| 5.10E-05 R | FSDASVQSDR Q   |                                                   |       |
| 3.10E-07 K | DAGVIAGLNV I   |                                                   |       |
| 0.00086 R  | VEIANDQGNIT    |                                                   |       |
| 0.0017 R   | MVNHVFQEFIR    | Oxidation (M) 0.2000000000.0                      |       |
| 5.00E-06 K | NALENYAYNV N   |                                                   |       |
| 0.00012 K  | VQQLLQDFFN E   |                                                   |       |
| 6.00E-06 R | TTPSYVAFTDS L  |                                                   |       |
| 1.10E-09 K | NQVAMNPVN R    | Oxidation (M) 0.000020000000000.0                 |       |
| 7.10E-09 K | ATAGDTHLGG M   |                                                   |       |
| 0.0032 K   | NAVVTVPAYFI Q  |                                                   |       |
| 2.20E-10 K | SINPDEAVAYCV   |                                                   |       |
| 7.90E-05 K | GEGPAIGIDLGV   |                                                   |       |
| 0.00056 K  | KVEDSIEEAIQI M | 3 Methyl (DE) 0.000000010000010000010000000.0     | emPAI |
| 0.0091 R   | VFDLLR R       |                                                   |       |
| 0.00011 R  | ALGDYLGVK A    |                                                   |       |
| 0.00055 R  | ELAQQIEK V     |                                                   |       |
| 0.0069 R   | DELTLEGIK Q    |                                                   |       |
| 1.90E-07 R | VLITDILLAR G   |                                                   |       |
| 0.00025 K  | RDELTLEGIK Q   |                                                   |       |
| 5.40E-10 K | GLDVIQQAQS T   |                                                   |       |
| 4.70E-09 K | MFVLDEADEN G   | 2 Oxidation (M) 0.2000000002000.0                 |       |
| 0.0015 R   | DHTVSATHGD D   |                                                   |       |
| 1.50E-09 R | GIYAYGFEPKPS G |                                                   |       |
| 8.20E-06 R | FYNVVVEELPS -  |                                                   |       |
| 1.10E-06 R | SRDHTVSATHD D  |                                                   |       |
| 7.50E-10 R | GIDVQQVSLV I I |                                                   | emPAI |
| 0.008 K    | FDLMYAK R      | Oxidation (M) 0.0002000.0                         |       |
| 5.90E-06 K | DVNAAVGTIK T   |                                                   |       |
| 0.0015 K   | YMACCLMYR G    | Oxidation (M) 0.000000200.0                       |       |
| 1.40E-11 R | LISQISSLTTSL F |                                                   |       |
| 4.80E-07 R | TVQFVDWCPIC    |                                                   |       |
| 9.50E-05 R | SLDIERPTYTNI L |                                                   |       |
| 4.90E-08 R | AVFVDLEPTVI T  |                                                   |       |
| 0.0048 R   | IHFMLSSYAPV A  | Oxidation (M) 0.0002000000000000.0                |       |
| 1.30E-08 R | AVCMISNNTA I   | Oxidation (M) 0.0002000000000000.0                |       |
| 7.00E-06 K | CGINYQPPTVV V  |                                                   |       |
| 0.00012 R  | AFVHWYVGECE    | Oxidation (M) 0.00000000002000000000.0            |       |
| 6.80E-07 R | QLFHPEQLISG G  |                                                   |       |
| 7.20E-09 R | FDGAINVDITE I  |                                                   |       |
| 0.00051 K  | AYHEQLSVPEI C  | 2 Oxidation (M) 0.0000000000000000000002200.0     |       |
| 3.10E-07 K | LADNCTGLQG L   |                                                   | emPAI |
| 3.80E-06 K | VQEIVSEIFGK S  |                                                   |       |
| 1.80E-05 R | SSGGLSDDEIN M  |                                                   |       |
| 0.00015 K  | MKETAEAYLG S   | Oxidation (M) 0.20000000000.0                     |       |
| 0.00021 R  | TAMAGEDVEIA    | Oxidation (M) 0.002000000000.0                    |       |
| 3.40E-06 R | NSADTTIYSVE S  |                                                   |       |
| 0.00014 K  | FSPSQIGANVL M  |                                                   |       |
| 3.30E-08 K | EVDEVLLVGGIV   | Oxidation (M) 0.0000000000200.0                   |       |
| 1.60E-08 R | QAVTNPTNTIIR   |                                                   |       |
| 1.80E-13 K | IPAEIASEIETA'T |                                                   |       |
| 9.90E-07 R | IINEPTAAALS YE | Oxidation (M) 0.00000000000002000.0               |       |
| 5.60E-05 K | SQVFSTAADN V   | Oxidation (M) 0.00000000000200000.0               |       |
| 0.00033 K  | ATNGDFTLGG S   |                                                   | emPAI |
| 0.0018 K   | AGIALSDK F     |                                                   |       |
| 0.0076 K   | YDSVHGQWK H    |                                                   |       |
| 0.0015 R   | VVDLIVHMSK A   |                                                   |       |

|            |                |                                        |       |
|------------|----------------|----------------------------------------|-------|
| 5.50E-06 R | AASFNIIPSSTG A |                                        |       |
| 1.60E-11 R | VPTVDVSVVD L   |                                        |       |
| 0.00015 K  | TLLFGEKPVTV N  |                                        |       |
| 3.90E-08 K | LVSWYDNEW V    |                                        |       |
| 1.00E-05 R | FGIVEGLMTT V   |                                        |       |
| 1.10E-12 K | GILGYTEDDV S   |                                        |       |
| 1.20E-09 K | SDLDIVSNASC V  |                                        | emPAI |
| 2.40E-05 K | VGAFSVLR E     |                                        |       |
| 0.0016 K   | IDLDLEVR L     |                                        |       |
| 4.00E-05 K | CLAGLIVSR S    |                                        |       |
| 0.0062 K   | HVVDDGLELR K   |                                        |       |
| 2.40E-06 K | ALSSPVLAAVG Y  |                                        |       |
| 2.90E-06 R | TNIQMIGALCF A  |                                        |       |
| 0.0088 K   | QHLALLSLGEI R  |                                        |       |
| 0.00021 R  | AELPSCLPVLV M  |                                        |       |
| 3.90E-07 K | MDVFNTFIDLI Q  | Oxidation (M) 0.200000000000.0         |       |
| 0.00045 R  | EYSLQALESFLI C |                                        |       |
| 1.20E-10 K | TVTCIASLASSL A |                                        |       |
| 1.20E-12 R | LSSIILQQLDD C  |                                        |       |
| 0.00086 K  | TDGLFLK C      |                                        |       |
| 0.0032 R   | SLNLTR K       |                                        |       |
| 3.40E-06 R | VAEYAFLYAK T   |                                        |       |
| 3.70E-06 K | TRYDDVDLITII E |                                        |       |
| 1.70E-10 R | TADLGGSSTTT A  |                                        |       |
| 1.60E-05 R | TQSFLTWESLE R  |                                        |       |
| 1.50E-13 K | NLANPTALLLS H  | Oxidation (M) 0.0000000000000200.0     |       |
| 2.90E-06 R | ENTEGEYSGLE G  |                                        |       |
| 0.0099 K   | ELNLYANVRP C   |                                        | emPAI |
| 0.0057 K   | RGILTLK Y      |                                        |       |
| 5.10E-07 K | AGFAGDDAPR A   |                                        |       |
| 0.009 K    | EITALAPSSMK I  | Oxidation (M) 0.00000000020.0          |       |
| 8.90E-06 R | GYMFTTAAER E   | Oxidation (M) 0.0020000000.0           |       |
| 9.60E-06 R | AVFPSIVGRPR H  |                                        |       |
| 2.20E-07 K | SEYDESGPSIVI K |                                        |       |
| 3.10E-09 K | NYELPDGQVI F   |                                        |       |
| 3.30E-09 K | LAYVALDYEQ F S |                                        |       |
| 7.90E-09 K | DLYGNIVLSGC M  | Oxidation (M) 0.00000000000002000000.0 |       |
| 1.70E-09 R | TTGIVLDSGDC L  |                                        | emPAI |
| 0.0014 K   | FEAIIYVLK K    |                                        |       |
| 2.80E-09 K | VGETVDLVGLI E  |                                        |       |
| 1.00E-05 R | SYTVTGVEMF I   |                                        |       |
| 9.20E-07 K | KYDEIDAAPEE A  |                                        |       |
| 2.40E-10 K | ILDEALAGDN G   |                                        |       |
| 0.00023 R  | HYAHVDCPGI N   |                                        |       |
| 1.90E-05 K | IVVELIVPVACI F | Oxidation (M) 0.0000000000000020.0     |       |
| 8.60E-06 K | TTLTAALTMAI K  |                                        |       |
| 2.20E-06 R | QTELPFLLAVE G  |                                        |       |
| 0.00041 R  | VVQILAR R      |                                        |       |
| 0.0027 K   | AEIANVLSR G    |                                        |       |
| 0.0005 K   | TAIAEGLAQR I   |                                        |       |
| 0.0016 R   | LDEMIVFR Q     | Oxidation (M) 0.00020000.0             |       |
| 2.90E-05 R | HAQLPEEAR E    |                                        |       |
| 0.0055 K   | EIELQVTER F    |                                        |       |
| 5.40E-05 R | VLELSLEEAR Q   |                                        |       |
| 4.30E-07 K | AIDLIDEAGSR V  |                                        |       |
| 6.90E-05 R | VLENLGADPSI T  |                                        |       |
| 0.0052 R   | VVDEGFDPSYI P  |                                        |       |
| 3.30E-05 R | GSGFVAVEIPF A  |                                        |       |

|          |   |              |   |                 |                                   |       |
|----------|---|--------------|---|-----------------|-----------------------------------|-------|
| 1.70E-05 | K | MPTLEEYGTN   | L | Oxidation (M)   | 0.2000000000000.0                 |       |
| 6.60E-10 | K | VPEPTVEEAIQE |   |                 |                                   |       |
| 2.50E-08 | R | YTDEALVAAA   | F |                 |                                   | emPAI |
| 1.90E-06 | R | LGHNFVGTQV   |   |                 |                                   |       |
| 8.30E-06 | R | SGAVASAVM    | K |                 |                                   |       |
| 0.005    | K | ISWVDPK      | T |                 |                                   |       |
| 2.70E-11 | R | GYAATAAQGS   | S |                 |                                   |       |
| 2.70E-12 | R | PETGSNEIDAA  | A | Methyl (DE)     | 0.0100000000000.0                 |       |
| 2.10E-09 | K | TGYRPEPGSM   | A |                 |                                   |       |
| 6.20E-05 | R | QTVAVGVIK    | S |                 |                                   |       |
| 0.0026   | K | ARYDEIK      | E |                 |                                   |       |
| 3.60E-07 | K | IGGIGTVPVGF  | V |                 |                                   |       |
| 0.0072   | R | STNLDWYK     | G |                 |                                   |       |
| 0.0011   | K | STTTGHLIYK   | L |                 |                                   |       |
| 1.20E-07 | R | EHALLAFTLGV  | Q |                 |                                   |       |
| 1.90E-05 | K | YYCTVIDAPG   | D |                 |                                   |       |
| 0.00036  | K | FHINIVVIGHV  | S |                 |                                   |       |
| 3.40E-05 | K | MTPTKPMVVI   | F | 2 Oxidation (M) | 0.2000002000000000000.0           |       |
| 3.30E-05 | R | VETGMIKPGV   | S | 2 Oxidation (M) | 0.0000200002000000000000.0        |       |
| 1.00E-06 | K | NMITGTSQADD  |   | Oxidation (M)   | 0.02000000000000000000000000000.0 | emPAI |
| 0.00024  | K | KPDVDIEK     | I |                 |                                   |       |
| 3.40E-05 | R | ADIVVDVLVK   | N |                 |                                   |       |
| 1.10E-05 | K | IPLTLIYDDIK  | S |                 |                                   |       |
| 1.70E-07 | K | DFGSALWDM    | G |                 |                                   |       |
| 2.90E-05 | K | GNIDVDTPFG   | L | Oxidation (M)   | 0.0000000000020.0                 |       |
| 2.30E-06 | K | FSLEETVAILH  | L |                 |                                   |       |
| 4.90E-07 | K | STYNDINPGM   | I |                 |                                   |       |
| 3.90E-07 | K | NPNPVPIPLID  | K |                 |                                   |       |
| 0.00093  | K | STVVNTHLMP   | S | Oxidation (M)   | 0.00000000200.0                   |       |
| 1.50E-10 | K | AADQGLVILQ   | R |                 |                                   |       |
| 1.50E-08 | R | EDGEPVGYND   | K |                 |                                   |       |
| 6.60E-12 | K | SSEVEALISEIT | L |                 |                                   |       |
| 3.90E-06 | K | EGQVLCYIEQL  | I |                 |                                   |       |
| 5.20E-05 | R | SGFGSFGMR    | S | Oxidation (M)   | 0.000000020.0                     |       |
| 3.30E-07 | R | SSFGDFGSDI   | S |                 |                                   |       |
| 0.0029   | R | SSFGGFGSND   | R |                 |                                   |       |
| 0.00053  | K | TLAFGIPIIDK  | I |                 |                                   |       |
| 0.0015   | R | GSASMFEGIG   | S | Oxidation (M)   | 0.000020000000.0                  |       |
| 0.0078   | R | FTELPSIAVER  | G |                 |                                   |       |
| 5.00E-06 | K | CEALHGDISQ   | S |                 |                                   |       |
| 4.60E-09 | R | QLDYGVDAVV   | V |                 |                                   |       |
| 0.0049   | R | DGHFNILVATI  | G |                 |                                   |       |
| 5.60E-06 | K | LADGITYSIIA  | A |                 |                                   |       |
| 4.10E-05 | R | ESAPSLDTICLY | Q | Oxidation (M)   | 0.00000000000000000000020.0       |       |
| 0.0011   | R | RVGDSESVGG   | A |                 |                                   | emPAI |
| 0.0032   | R | SLNLTLR      | K |                 |                                   |       |
| 3.40E-06 | R | VAEYAFLYAK   | T |                 |                                   |       |
| 3.70E-06 | K | TRYDDVDLITIE |   |                 |                                   |       |
| 1.70E-10 | R | TADLGGSSTTIA |   | Methyl (DE)     | 0.000000000001000.0               |       |
| 3.10E-05 | K | TDGLFLQCCDI  | Y |                 |                                   |       |
| 1.20E-06 | K | ATLFPGDGIGF  | Q |                 |                                   |       |
| 0.0099   | K | ELNLYANVRP   | T |                 |                                   | emPAI |
| 3.00E-05 | K | GAGANILR     | A |                 |                                   |       |
| 5.30E-05 | K | LQLIVFGK     | K |                 |                                   |       |
| 4.70E-05 | R | AVAGAGVLSG   | L |                 |                                   |       |
| 1.50E-05 | K | LLIQNQDEMI   | A | Oxidation (M)   | 0.00000000200.0                   |       |
| 2.40E-06 | R | YFPTQALNFA   | D |                 |                                   |       |
| 3.20E-09 | K | GFTNFALDFLN  | T | Oxidation (M)   | 0.00000000002000000000.0          | emPAI |

|          |   |               |   |                                      |       |
|----------|---|---------------|---|--------------------------------------|-------|
| 0.00071  | R | AGVSGYASVK    | S |                                      |       |
| 1.20E-06 | R | HNTLLEEQR     | H |                                      |       |
| 0.0025   | R | ELLEQLLSTK    | M |                                      |       |
| 0.00047  | R | NLLYQQQLR     | Q |                                      |       |
| 1.30E-05 | R | NNSLLSGIIDG   | S |                                      |       |
| 1.90E-06 | R | TAASSYSGIEG   | R |                                      |       |
| 2.50E-06 | R | SFSVYNNPSA    | K |                                      |       |
| 0.0015   | R | HIDPLWPSDH    | S |                                      |       |
| 0.0005   | R | SFLDFSTQDEE   | A |                                      |       |
| 1.40E-06 | K | TESAHAHISNC   | L |                                      |       |
| 0.00054  | R | SLEYQLLQCE    | H | Oxidation (M) 0.000000000002000000.0 | emPAI |
| 0.0027   | K | VQQITIR       | S |                                      |       |
| 0.0026   | K | TTEGIDLAK     | D |                                      |       |
| 0.00019  | K | EIEDAVADLR    | S |                                      |       |
| 4.10E-05 | K | VQSIVAEIFGK   | S |                                      |       |
| 3.60E-06 | R | SSGGLSEDDIQ   | M |                                      |       |
| 0.00015  | K | MKETAEAYLG    | S | Oxidation (M) 0.20000000000.0        |       |
| 4.60E-05 | R | QAVTNPTNTV    | R |                                      |       |
| 3.30E-08 | K | EVDEVLLVGGIV  |   | Oxidation (M) 0.0000000000200.0      |       |
| 0.00018  | R | SRFETLVNHLIIT |   |                                      |       |
| 1.10E-08 | K | SQVFSTAADN    | V |                                      | emPAI |
| 3.60E-05 | R | HENVDIVVIR    | E |                                      |       |
| 0.00024  | R | HLQFPSFADR    | L |                                      |       |
| 9.80E-07 | K | LADGLFLESCR   | E |                                      |       |
| 2.80E-07 | K | YAFEYAYLNNF   | K |                                      |       |
| 4.20E-08 | K | TPVGGGVSSLI   | K |                                      |       |
| 2.00E-05 | K | ANPVALLSSA    | H |                                      |       |
| 0.0016   | K | ELDLFASLVNC   | H |                                      |       |
| 0.00035  | R | ENTEGEYAGLIV  |   |                                      | emPAI |
| 0.00062  | K | GVLLYGPPGT    | T |                                      |       |
| 6.10E-05 | K | RFDSEVSGDR    | E |                                      |       |
| 0.00021  | R | STDDFNGAQL    | A |                                      |       |
| 0.0024   | R | ACAAQTNATF    | L |                                      |       |
| 0.00067  | K | DSYLILDTPSE   | V |                                      |       |
| 1.50E-13 | R | TMLELLNQLD    | I | Methyl (DE); (0.020000000000000010.0 | emPAI |
| 1.70E-08 | R | GLAYDTSDDQ    | G |                                      |       |
| 1.20E-11 | R | VPIICTGNDFS   | D |                                      |       |
| 9.60E-07 | R | VQLAETYLSQ    | G |                                      |       |
| 1.90E-05 | K | IKDEDIVTLVD   | A |                                      | emPAI |
| 8.30E-05 | R | IAGLEVLR      | I |                                      |       |
| 0.0026   | R | TPVENSLR      | D |                                      |       |
| 0.0025   | R | IPAVQDLVR     | K |                                      |       |
| 8.10E-05 | K | NQADSVVYQT    | Q |                                      |       |
| 1.40E-09 | K | QFAAEEISAQ    | K |                                      |       |
| 0.00017  | R | QAVVNPENTF    | R |                                      |       |
| 1.90E-09 | R | IINEPTAASL    | A |                                      |       |
| 0.0028   | K | LSFKDIDEVILV  | I |                                      | emPAI |
| 0.0057   | K | RGILTLK       | Y |                                      |       |
| 5.10E-07 | K | AGFAGDDAPR    | A |                                      |       |
| 0.009    | K | EITALAPSSMK   | I | Oxidation (M) 0.00000000020.0        |       |
| 9.60E-06 | R | AVFPSIVGRPR   | H |                                      |       |
| 3.80E-07 | K | NYELPDGQVI    | F |                                      |       |
| 0.0015   | R | VAPEEHPILLT   | A |                                      |       |
| 1.70E-09 | R | TTGIVLDSGDC   | L |                                      | emPAI |
| 0.0027   | R | TCNYLTSAA     | Y |                                      |       |
| 0.00054  | R | MLQYGEQNIR    | R | Oxidation (M) 0.2000000000.0         |       |
| 3.20E-05 | R | NLAGEIAQEY    | R |                                      |       |
| 5.00E-09 | R | FLPLGLGLLYL   | Q |                                      |       |

|          |   |                |                                        |       |
|----------|---|----------------|----------------------------------------|-------|
| 4.30E-06 | K | YIPLSPILEGFIII |                                        |       |
| 4.90E-06 | K | YLSDILSVLALT   |                                        |       |
| 0.00057  | R | QNLAAATFVNA    |                                        | emPAI |
| 0.00013  | K | YLSGMGIAR      | Oxidation (M) 0.000020000.0            |       |
| 0.00024  | K | LDLDSTFEQK     |                                        |       |
| 0.00036  | R | ALAESAQDAF     |                                        |       |
| 7.60E-08 | R | NQIQAYVFDV     |                                        |       |
| 1.50E-07 | R | NSVLAFSSEVP    |                                        |       |
| 5.70E-07 | K | DVMDMVLVT      | 2 Oxidation (M) 0.0020200000000000.0   | emPAI |
| 1.60E-08 | R | TGGGGLDLSSI    |                                        |       |
| 3.60E-05 | R | TMAQLGLCAF     | Oxidation (M) 0.0200000000.0           |       |
| 9.90E-07 | K | AFEVLNSLEV     |                                        |       |
| 5.40E-10 | K | TLVMLEDFLNI    | Oxidation (M) 0.0002000000000000.0     | emPAI |
| 0.00076  | K | VVSAMVNND      | Oxidation (M) 0.00002000000.0          |       |
| 0.0011   | R | TTFVPSTPPAL    |                                        |       |
| 0.0026   | K | IPGVISASSFD    |                                        |       |
| 9.90E-05 | K | IGIYNIEGCSR    |                                        |       |
| 3.30E-09 | K | VLDSGGLSPEL    |                                        |       |
| 8.50E-08 | K | DQAVDGLSSD     |                                        | emPAI |
| 1.60E-05 | R | GLCAIAQAESL    |                                        |       |
| 2.70E-06 | R | ELAEDGYSGVIV   |                                        |       |
| 6.80E-11 | K | FVADGVFYAEI    |                                        |       |
| 4.40E-09 | K | VGEEVEILGLR    |                                        |       |
| 3.50E-08 | R | GSALSALQGTI    |                                        |       |
| 0.00023  | R | HYAHVDCPGI     |                                        |       |
| 8.00E-05 | K | VDVDDPELLIE    | Oxidation (M) 0.000000000000002000.0   | emPAI |
| 3.60E-08 | R | SPSVLVLLPTR    |                                        |       |
| 3.40E-06 | K | FATLVATNVA     |                                        |       |
| 2.20E-10 | K | TLAFVLPILS     |                                        |       |
| 0.0049   | K | NAGVNGSVV      |                                        |       |
| 7.00E-06 | R | DLVGVLEDAIF    |                                        |       |
| 7.50E-07 | K | VVAAGANPVL     |                                        |       |
| 8.60E-10 | K | AAVEEGIVVGL    |                                        |       |
| 3.00E-05 | K | LSGGVAVIQV     |                                        | emPAI |
| 3.60E-05 | R | HENVDIVVIR     |                                        |       |
| 0.00024  | R | HLQFPSFADR     |                                        |       |
| 2.80E-07 | K | YAFEYAYLNNF    |                                        |       |
| 1.50E-07 | K | TPVGGGVSSLIK   |                                        |       |
| 0.00035  | R | ENTEGEYAGLIV   |                                        | emPAI |
| 8.90E-13 | R | ALSDAADQAN     |                                        |       |
| 5.90E-05 | K | YCLDNFAAPLIT   |                                        |       |
| 9.50E-06 | R | ETLVFLSQCFI    |                                        | emPAI |
| 0.00077  | R | QAVDISPLR      |                                        |       |
| 0.00079  | K | HATFVPHTAG     |                                        |       |
| 6.70E-09 | R | VNQAIFLLTTG    |                                        |       |
| 3.70E-10 | K | TIAECLADELING  |                                        | emPAI |
| 6.20E-06 | R | LLILT DPR      |                                        |       |
| 5.00E-12 | R | VIVAIENPQDII   |                                        |       |
| 0.0022   | R | HTPGTFTNQML    | Oxidation (M) 0.000000000200000000.0   |       |
| 4.50E-05 | K | EGALGNIPIIAF   | Oxidation (M) 0.00000000000000000020.0 | emPAI |
| 0.0049   | K | NAGVNGSVV      |                                        |       |
| 9.50E-05 | R | DIISILEDIAIK   |                                        |       |
| 7.50E-07 | K | VVAAGANPVL     |                                        |       |
| 8.60E-10 | K | AAVEEGIVVGL    |                                        |       |
| 3.00E-05 | K | LSGGVAVIQV     |                                        | emPAI |
| 8.20E-05 | R | LWGENFFDPAK    |                                        |       |
| 1.90E-09 | R | PMEEGLAEAI     | Oxidation (M) 0.02000000000000.0       |       |
| 0.00011  | K | AYLPVVESFGF    |                                        |       |

|            |                 |                                                |       |
|------------|-----------------|------------------------------------------------|-------|
| 8.30E-07 K | STLTDSLVAAM     |                                                | emPAI |
| 0.0029 R   | SSFGGFGSND R    |                                                |       |
| 0.00053 K  | TLAFGIPIIDK I   |                                                |       |
| 0.003 R    | FNELPSIAVER G   |                                                |       |
| 0.00069 K  | CEALHGDISQ E    |                                                |       |
| 0.00097 K  | KGSAILIHGQDA    | Methyl (DE) 0.0000000001000.0                  |       |
| 1.60E-09 R | SSGFGSFGSGCS    |                                                |       |
| 4.10E-05 R | ESAPSLDTICLYE   | Oxidation (M) 0.00000000000000000020.0         | emPAI |
| 4.70E-09 R | LSFLYLITGNLCL   |                                                |       |
| 5.70E-07 R | SLLDTNPTIESCT   |                                                |       |
| 0.0002 R   | GPPALVDFFSCL    |                                                |       |
| 4.70E-06 R | VFLSILQTIPLV R  |                                                | emPAI |
| 1.60E-05 K | AVANSTSATFLV    |                                                |       |
| 1.30E-11 R | TMLELLNQLD G    |                                                |       |
| 3.20E-05 K | SELLPCLGAADN    |                                                |       |
| 0.0062 R   | LLQFFQSPHASK    |                                                |       |
| 6.50E-11 R | LLDFLEIASQQE    |                                                | emPAI |
| 3.00E-05 K | GAGANILR A      |                                                |       |
| 5.30E-05 K | LQLIVFGK K      |                                                |       |
| 0.00054 K  | SDGIAGLYR G     |                                                |       |
| 9.70E-05 K | SSFDAFSQIVK K   |                                                |       |
| 1.50E-05 K | LLIQNQDEMLA     | Oxidation (M) 0.00000000200.0                  |       |
| 2.40E-06 R | YFPTQALNFAFD    |                                                | emPAI |
| 0.00014 K  | VIEVEGPR G      |                                                |       |
| 0.00023 K  | FLDGIYVSEK S    |                                                |       |
| 1.40E-05 R | TALSHVDNLIS G   |                                                |       |
| 0.0015 R   | FVYAHFPINAS S   |                                                |       |
| 2.80E-09 K | TILSSETMDIPIV   | Oxidation (M) 0.0000000200000000.0             | emPAI |
| 0.0027 R   | HGDLLR T        |                                                |       |
| 0.0053 K   | SAGDPVLAR I     |                                                |       |
| 1.60E-06 R | AQEFVCGLAQ I    |                                                |       |
| 4.60E-08 R | LEVYTADDYAIW    |                                                |       |
| 8.30E-06 R | TVQHLLIGSGMA    | Oxidation (M) 0.0000000002000000000000000000.0 | emPAI |
| 1.60E-06 R | VGLTGLTVAEYD    |                                                |       |
| 5.70E-10 R | FTQANSEVSAI I   |                                                |       |
| 5.10E-06 R | DAEQDVLLEF F    |                                                | emPAI |
| 0.0089 K   | AVDSLVPGR G     |                                                |       |
| 4.80E-05 R | AAELTNLFESR I   |                                                |       |
| 5.80E-14 R | EVAFAQFGSIG     |                                                | emPAI |
| 2.20E-10 K | TSAADVLQLLTM    |                                                |       |
| 5.30E-09 K | QELLAELYTEIG    |                                                | emPAI |
| 0.0013 R   | ALLIDLEPR V     |                                                |       |
| 0.0015 R   | VINGIQNGDYIN    |                                                |       |
| 1.50E-05 R | DIIESLVDEYK A   |                                                |       |
| 0.0095 R   | YPGYMNNDL C     | Oxidation (M) 0.00002000000000000000.0         |       |
| 3.50E-09 K | YISILNIIQGEVI I |                                                | emPAI |
| 1.30E-07 K | SLFESLNSVGR R   |                                                |       |
| 0.0015 K   | LLAENLNCLLD     |                                                |       |
| 2.70E-07 K | TATVAQILENV D   |                                                |       |
| 0.0091 K   | MNYLDSFPPD      | Oxidation (M) 0.2000000000000000.0             |       |
| 0.0097 R   | VEHLVDEYNSI S   |                                                | emPAI |
| 0.00016 K  | SEVLDFIR S      |                                                |       |
| 5.10E-12 K | IADAEENLGES E   |                                                |       |
| 0.00047 R  | SHGMAPLYET A    | 2 Oxidation (M) 0.00020000000000000000000020.0 | emPAI |
| 0.001 R    | ESAIAQIR T      |                                                |       |
| 8.80E-06 R | LGNLGTISQNV V   |                                                |       |
| 0.0004 R   | TCGPLLDVVAI E   |                                                |       |
| 0.002 K    | VTFHNPQVQET     |                                                |       |

|          |   |                 |                                       |       |
|----------|---|-----------------|---------------------------------------|-------|
| 9.50E-09 | K | VPYQGGAVEL E    |                                       | emPAI |
| 3.40E-09 | R | LEGASEESLLS(V   |                                       |       |
| 1.10E-08 | K | VFDDSVESFTS G   |                                       | emPAI |
| 0.00062  | K | GVLLYGPPGT(T    |                                       |       |
| 2.50E-06 | K | LAEGFNGADLI N   |                                       |       |
| 0.00048  | R | AIASNIDANFLI V  |                                       |       |
| 0.00043  | R | NICTEAGMFA A    | Oxidation (M) 0.000000020000.0        |       |
| 5.10E-07 | K | SLQSVGQIIGE' L  |                                       | emPAI |
| 0.0031   | R | FLALDEADR M     |                                       |       |
| 1.30E-05 | R | VGSSTDLIVQR V   |                                       |       |
| 8.40E-06 | R | TPILVATDVAA G   |                                       |       |
| 0.0033   | R | MLDMGFEPQ K     | 2 Oxidation (M) 0.20020000000.0       |       |
| 1.00E-06 | R | LAADFLANYIF V   |                                       | emPAI |
| 1.30E-05 | K | GTVEIITPVELII Q |                                       |       |
| 5.80E-05 | R | IHSENTGNTAI G   |                                       |       |
| 2.40E-06 | K | LCQLIDEYTOII K  |                                       |       |
| 0.00055  | R | VGLVAPIDVV\ I   |                                       | emPAI |
| 0.00086  | R | SLDSHIEDQFA L   |                                       |       |
| 4.10E-05 | R | LDTGNYSWGS K    |                                       |       |
| 2.90E-10 | R | VLDVVYNASN T    |                                       | emPAI |
| 1.90E-09 | K | SVAAGSATVA' S   |                                       |       |
| 5.10E-06 | R | YGNATVVENT G    |                                       |       |
| 0.00043  | K | QFSGVDILSGE V   |                                       | emPAI |
| 3.10E-05 | K | DLPVAVMTFLIS A  |                                       |       |
| 0.0051   | R | SQLLSFMDQLI T   |                                       |       |
| 1.50E-06 | K | SGPLPVDTFTF I   |                                       |       |
| 0.00094  | R | NPDTISQISDLI T  |                                       |       |
| 0.00043  | K | VVIDVLSIVS^ R   |                                       | emPAI |
| 0.008    | K | IAELLR Y        |                                       |       |
| 4.60E-05 | K | ADLVNNLGTI^ S   |                                       |       |
| 0.00046  | R | ELISNSSDALDI I  |                                       |       |
| 1.70E-07 | K | GIVDSEDLPLN E   |                                       |       |
| 9.30E-05 | K | SGDELTSCLKDY M  |                                       | emPAI |
| 0.00013  | K | VLDFELVR D      |                                       |       |
| 0.0054   | R | GINDTYFGR L     |                                       |       |
| 6.00E-06 | K | SLLEEFYSIR L    |                                       |       |
| 1.90E-07 | K | APNSFGFLGE V    |                                       | emPAI |
| 0.00063  | R | VSYTVAR A       |                                       |       |
| 0.00032  | R | VLAHTQIR K      |                                       |       |
| 0.0023   | R | HGSLGFLPR K     |                                       |       |
| 0.00054  | R | QSLLTQTSR L     |                                       |       |
| 0.0016   | K | VDFAYSFFEK Q    |                                       |       |
| 8.50E-06 | K | FIDTASIFGHGI F  |                                       |       |
| 0.00096  | K | VGTEAHTAM1T     | Oxidation (M) 0.00000000200000.0      | emPAI |
| 0.0042   | R | ILSTINR E       |                                       |       |
| 0.00062  | R | GVLLYGPPGT(T    |                                       |       |
| 0.001    | K | ISAAEIAAICQE K  | Oxidation (M) 0.0000000000000020000.0 |       |
| 6.30E-05 | K | ENAPAIIFIDEV F  |                                       | emPAI |
| 1.20E-08 | R | SSIFDANAGIG S   |                                       |       |
| 6.20E-07 | K | GILGYTDEDV\ S   |                                       |       |
| 1.10E-05 | R | TGNENAQLTP L    |                                       |       |
| 9.50E-10 | R | TESAAVSTIVN E   |                                       | emPAI |
| 6.50E-06 | K | YLSGLGIAR Q     |                                       |       |
| 0.00026  | K | LLLDDVFEQK N    |                                       |       |
| 3.70E-08 | R | GQIQAYVFDV A    |                                       | emPAI |
| 1.90E-06 | K | GVDGLFESFAF L   |                                       |       |
| 4.00E-09 | R | AESQQVSESS(S    |                                       | emPAI |
| 2.10E-05 | R | AGQYGTVTSL' D   |                                       |       |

|            |                 |                                        |       |
|------------|-----------------|----------------------------------------|-------|
| 0.0032 R   | TMVFANTVEA A    | Oxidation (M) 0.020000000000000000.0   |       |
| 1.60E-05 K | THGYLAPIIDQ E   |                                        | emPAI |
| 0.00072 K  | MVNADLAR I      | Oxidation (M) 0.20000000.0             |       |
| 0.00025 R  | MSLLAEQR V      | Oxidation (M) 0.20000000.0             |       |
| 0.0021 K   | AGHQTSAESM A    |                                        |       |
| 2.00E-08 K | TMISDSDYTEF W   | Oxidation (M) 0.0200000000000000.0     | emPAI |
| 2.90E-06 R | TCYAQSSQIR Q    |                                        |       |
| 2.90E-07 K | ATQGIYPLQN\ K   |                                        |       |
| 0.0012 K   | VDRPADEMA\ -    | Oxidation (M) 0.000000020000000000.0   | emPAI |
| 0.002 K    | IMFALTSIK G     | Oxidation (M) 0.02000000.0             |       |
| 0.0075 K   | IPDWFLNR Q      |                                        |       |
| 2.10E-08 R | AGELSAAEIDN Q   | Oxidation (M) 0.00000000000020000000.0 |       |
| 5.20E-05 K | IGMVGLFTR G     |                                        |       |
| 1.30E-07 K | FASFETIVEMII\ Y |                                        | emPAI |
| 0.0016 K   | SPEQVSAAVK A    |                                        |       |
| 2.00E-07 R | EGLVSDAIESFIA   |                                        |       |
| 0.0014 K   | QVGYTPDYLFIT    |                                        |       |
| 0.00067 K  | FQSVPVQAGC G    |                                        | emPAI |
| 0.0065 K   | LVAMATPEDN I    | 2 Oxidation (M) 0.00020000020.0        |       |
| 1.50E-10 R | DLFEGILQAGS T   |                                        | emPAI |
| 2.80E-06 R | APLQNTVLLIG     |                                        |       |
| 1.10E-07 K | AGGECLTFDQ A    |                                        | emPAI |
| 0.00062 K  | GVLLYGPPGT\ T   |                                        |       |
| 0.0033 R   | IDILDQALLRP\ I  |                                        |       |
| 3.50E-08 R | TMLELLNQLD\ I   | Oxidation (M) 0.0200000000000000.0     |       |
| 0.0053 R   | EHAPSIIFMDE M   |                                        | emPAI |
| 1.40E-05 R | DAVLLVFANK Q    |                                        |       |
| 0.00041 R  | ILMVGLDAAG T    | Oxidation (M) 0.0020000000.0           |       |
| 7.30E-06 R | MLNEDELDA Q     | Oxidation (M) 0.2000000000000000.0     | emPAI |
| 3.30E-08 R | SIVGATLEVIQI K  |                                        |       |
| 0.0001 R   | SDSQVFLFLNS C   |                                        | emPAI |
| 6.60E-05 R | IEATTWDALIK L   |                                        |       |
| 4.20E-08 R | TLLANCVAAGI K   |                                        | emPAI |
| 0.00039 K  | IACYVTVR G      |                                        |       |
| 0.00029 K  | LVLNISVGESG L   |                                        |       |
| 2.00E-06 K | VLEQLSGQTP\ A   |                                        | emPAI |
| 0.0012 R   | VGVHHLDDSC N    |                                        |       |
| 5.40E-08 K | SYEVTSPADS A    |                                        | emPAI |
| 5.80E-07 K | NPAAIIVGAGLF T  |                                        |       |
| 3.40E-05 R | FASEVAGVQD G    |                                        | emPAI |
| 0.00032 R  | HLVFPFIFLQ\ Q   |                                        |       |
| 5.20E-06 K | SLEEEAAPLVS A   |                                        | emPAI |
| 6.80E-05 K | SVAAGMNAM R     | 2 Oxidation (M) 0.000002002000.0       |       |
| 1.10E-06 R | TALVDAASVS\ D   |                                        | emPAI |
| 6.40E-05 K | DAGVIAGLNV. I   |                                        |       |
| 0.00015 K  | MKETAEAYLG K    | Oxidation (M) 0.2000000000.0           |       |
| 5.50E-05 R | ITPSWVGFTD\ L   |                                        | emPAI |
| 4.70E-06 R | IGDLELFR T      |                                        |       |
| 0.00091 R  | FEAHSNQQFC Y    |                                        |       |
| 0.00019 K  | LTGSVLSSFLDI L  |                                        | emPAI |
| 0.0043 R   | VDSVFALR S      |                                        |       |
| 2.50E-09 R | VINLLLQYLSN\ N  |                                        | emPAI |
| 0.0069 R   | SGAYIVR Q       |                                        |       |
| 0.00035 K  | ANVDYEQIVR K    |                                        |       |
| 3.50E-07 R | FVIGGPHGDA K    |                                        | emPAI |
| 2.70E-06 K | AGALGDSVTITE    |                                        |       |
| 1.90E-05 K | ITVTADGQFSK R   |                                        | emPAI |
| 0.00035 R  | SSETVAQLQK T    |                                        |       |

|            |                 |                                                     |       |
|------------|-----------------|-----------------------------------------------------|-------|
| 2.60E-07 K | IENHHQDDGL K    |                                                     | emPAI |
| 0.0037 R   | FELLAR L        |                                                     |       |
| 1.70E-08 R | TMLEIVNQLD G    | Oxidation (M) 0.020000000000000.0                   | emPAI |
| 4.80E-08 R | SSAESLFNLAK Q   |                                                     |       |
| 0.0021 R   | TLTESLNNGNF F   |                                                     | emPAI |
| 0.0032 K   | LTIIIEAR K      |                                                     |       |
| 0.0089 R   | ECLPLVLIIR N    |                                                     |       |
| 2.10E-06 K | FDVGNVVMV N     | Oxidation (M) 0.0000000200000.0                     |       |
| 0.00039 K  | SRECLPLVLIIR N  |                                                     | emPAI |
| 1.70E-06 R | LADTYGSGELF L   |                                                     |       |
| 0.00045 K  | TEALLQEPFLK N   |                                                     |       |
| 0.00037 R  | VTELVPLVAEII E  |                                                     | emPAI |
| 0.0026 R   | NHLANLNK Y      |                                                     |       |
| 6.40E-08 K | VATELGLWQES     |                                                     | emPAI |
| 0.0045 R   | DIVELQLK Q      |                                                     |       |
| 8.50E-05 K | QLDCELVIR K     |                                                     |       |
| 1.30E-05 K | ESSASSPELATI L  |                                                     | emPAI |
| 1.90E-05 R | SALNALLFR T     |                                                     |       |
| 2.30E-05 K | GLLLFIDEADA N   |                                                     | emPAI |
| 1.70E-07 K | VIELSDVILEVL D  |                                                     |       |
| 0.0007 K   | VIELSDVILEVL C  |                                                     | emPAI |
| 3.50E-05 R | LVELANEF SR S   |                                                     |       |
| 6.30E-05 K | TVAFLLPAIEA\ S  |                                                     |       |
| 0.0029 K   | VLVLDEADHLI R   | Oxidation (M) 0.0000000000002000.0                  | emPAI |
| 0.0022 K   | LPDIEVVR V      |                                                     |       |
| 0.00067 K  | SIESSDLNFTR Y   |                                                     |       |
| 2.90E-05 K | LAIFTALAFSQ L   |                                                     |       |
| 0.0097 K   | SLEPFVNWLEI -   |                                                     | emPAI |
| 4.90E-08 R | VQIASLIGLLIR H  |                                                     |       |
| 0.0014 R   | SFVNLIESLLIKI I |                                                     | emPAI |
| 3.70E-07 R | GLLGTGVTIAR E   |                                                     |       |
| 0.0027 R   | ALWTGLGPN\ N    |                                                     | emPAI |
| 1.10E-05 K | IVNDNYLYAR V    |                                                     |       |
| 0.0015 K   | MSDIAPNLAA L    | Oxidation (M) 0.2000000000000000000.0               | emPAI |
| 0.0052 K   | VVDSLYVR S      |                                                     |       |
| 2.00E-06 K | EYVEALALLSTIE   |                                                     |       |
| 0.0075 R   | HLSSLYDTLLE( L  |                                                     | emPAI |
| 0.0015 K   | VGDFEMNLK R     | Oxidation (M) 0.000002000.0                         |       |
| 3.70E-06 K | EGQVIGYLHQ L    |                                                     | emPAI |
| 8.30E-05 K | FYEILGVPK S     |                                                     |       |
| 6.60E-05 K | EGMGGGGGGC Q    | Oxidation (M) 0.002000000000000000000000000000000.0 | emPAI |
| 0.0011 K   | WAEIIGQAR H     |                                                     |       |
| 8.90E-06 K | LLSEEVDFSR G    |                                                     | emPAI |
| 0.0051 R   | NATWTLSNFC G    |                                                     |       |
| 4.10E-06 R | IITVCLEGLENI V  |                                                     | emPAI |
| 8.30E-05 K | FYEILGVPK T     |                                                     |       |
| 0.00024 K  | VSLEDVYLGTT K   |                                                     | emPAI |
| 0.0027 K   | YFVEAGAI AVF R  |                                                     |       |
| 0.00022 R  | EQLAIAEFADA V   |                                                     |       |
| 0.0011 R   | TLESNTVVAG( E   |                                                     | emPAI |
| 0.0013 K   | AGALGDSVSIT E   |                                                     |       |
| 1.90E-05 K | ITVTADGQFSK R   |                                                     | emPAI |
| 6.50E-05 K | TPGPGAQSAL A    |                                                     |       |
| 0.00067 R  | IEDVTPIPTDS1 R  |                                                     | emPAI |
| 2.20E-05 K | ILQLLR L        |                                                     |       |
| 0.00012 K  | LLFIIR I        |                                                     | emPAI |
| 0.00019 K  | MGYGSAAVEL Y    | Oxidation (M) 0.2000000000000.0                     |       |
| 0.00034 K  | LSQVELLVIDE/ S  |                                                     | emPAI |

|             |              |               |               |                 |                                  |       |
|-------------|--------------|---------------|---------------|-----------------|----------------------------------|-------|
| 0.0029      | K            | TGFVFPR       | V             |                 |                                  |       |
| 1.80E-05    | K            | LLPLPELLQSI   | A             |                 |                                  | emPAI |
| 0.0021      | R            | VLINAFTVR     | A             |                 |                                  |       |
| 0.00021     | K            | AFQAVEQFLQ    | Q             |                 |                                  | emPAI |
| 0.00041     | K            | LAPSGFVLLR    | D             |                 |                                  |       |
| 0.0049      | R            | IVSLLSESYNPI  | Y             |                 |                                  | emPAI |
| 0.0003      | R            | NPTLAGALTR    | L             |                 |                                  |       |
| 0.0063      | R            | SDTIASLLAALIT |               | Oxidation (M)   | 0.0000000000020000.0             | emPAI |
| 0.0027      | R            | VTYLVLDEADF   | M             |                 |                                  |       |
| 0.0033      | R            | MLDMGFDPQ     | K             | Methyl (DE);    | 0.20020010000.0                  | emPAI |
| 0.0078      | R            | DHACVVGGYF    | M             |                 |                                  |       |
| 0.001       | R            | TNVIPIEDAR    | H             |                 |                                  | emPAI |
| 0.004       | K            | DVIFVTTR      | R             |                 |                                  |       |
| 0.0062      | K            | AVVIYVPFR     | L             |                 |                                  | emPAI |
| 0.0051      | R            | SKVEGAIESR    | G             |                 |                                  |       |
| 0.0045      | K            | SLPLQLIDILK   | Q             |                 |                                  | emPAI |
| pep_expect  | pep_res_befo | pep_seq       | pep_res_after | pep_var_mod     | pep_var_mod_pos                  |       |
| 0.0000011   | K            | SSVCDIAPK     | G             |                 |                                  |       |
| 0.00000043  | R            | YLTASAVFR     | G             |                 |                                  |       |
| 0.0086      | K            | IREEYPDR      | M             |                 |                                  |       |
| 0.000003    | K            | LAVNLIPFPR    | L             |                 |                                  |       |
| 0.000011    | R            | FPGQLNSDLR    | K             |                 |                                  |       |
| 0.00000095  | R            | VSEQFTAMFR    | R             |                 |                                  |       |
| 0.000087    | R            | KLAVNLIPFPR   | L             |                 |                                  |       |
| 0.0000039   | R            | IDVVFNEASGC   | Y             |                 |                                  |       |
| 0.000000035 | R            | MMMTFSVFP     | V             |                 |                                  |       |
| 0.000000014 | R            | LHFFMVGAF     | G             | Oxidation (M)   | 0.00002000000000.0               |       |
| 0.00001     | R            | AVLMDLEPGT    | S             | 2 Oxidation (M) | 0.000200000020000.0              |       |
| 0.0000011   | K            | NSSYFVEWIP    | S             |                 |                                  |       |
| 0.000000018 | R            | EILHIQGGQC    | F             |                 |                                  |       |
| 8.5E-14     | K            | MASTFIGNST    | R             | 2 Oxidation (M) | 0.20000000000000200.0            |       |
| 4E-15       | K            | GHYTEGAELI    | C             |                 |                                  |       |
| 0.0000036   | K            | GHYTEGAELI    | E             |                 |                                  |       |
| 0.0036      | -            | MREILHIQGG    | C             | Oxidation (M)   | 0.200000000000000000.0           |       |
| 0.00000099  | R            | GSQQYSALSVI   | N             |                 |                                  |       |
| 0.000000001 | K            | LANPTFGDLNI   | F             | Oxidation (M)   | 0.000000000000000200000000.0     |       |
| 0.000092    | R            | SGPFGQIFRPE   | G             |                 |                                  |       |
| 0.00037     | K            | FWEVICDEHG    | I             |                 |                                  |       |
| 0.000013    | K            | EAENSDCLQG    | I             | Oxidation (M)   | 0.000000000000000000000020000000 | emPAI |
| 0.000068    | R            | YLTASAMFR     | G             |                 |                                  |       |
| 0.0086      | K            | IREEYPDR      | M             |                 |                                  |       |
| 0.000003    | K            | LAVNLIPFPR    | L             |                 |                                  |       |
| 0.000011    | R            | FPGQLNSDLR    | K             |                 |                                  |       |
| 0.00000095  | R            | VSEQFTAMFR    | R             |                 |                                  |       |
| 0.000087    | R            | KLAVNLIPFPR   | L             |                 |                                  |       |
| 0.00031     | K            | STVCDIPPTGL   | M             |                 |                                  |       |
| 0.000000053 | R            | YTGDSLQLEF    | I             |                 |                                  |       |
| 0.00000035  | R            | MMLTFSVFPS    | V             | 2 Oxidation (M) | 0.220000000000.0                 |       |
| 1.1E-09     | R            | INVYYNEASCC   | F             |                 |                                  |       |
| 0.00000046  | K            | EVDEQMLNV     | C             | Oxidation (M)   | 0.000002000000.0                 |       |
| 0.000000014 | R            | LHFFMVGAF     | G             | Oxidation (M)   | 0.00002000000000.0               |       |
| 0.00001     | R            | AVLMDLEPGT    | S             | 2 Oxidation (M) | 0.000200000020000.0              |       |
| 0.0000011   | K            | NSSYFVEWIP    | S             |                 |                                  |       |
| 0.00019     | R            | SLTVPELTQQM   | N             | Oxidation (M)   | 0.000000000020000.0              |       |
| 0.000000018 | R            | EILHIQGGQC    | F             |                 |                                  |       |
| 0.000012    | K            | FWEVCAEHC     | Y             |                 |                                  |       |
| 8.5E-14     | K            | MASTFIGNST    | R             | 2 Oxidation (M) | 0.20000000000000200.0            |       |
| 4E-15       | K            | GHYTEGAELI    | C             |                 |                                  |       |

|               |                |                                            |       |
|---------------|----------------|--------------------------------------------|-------|
| 0.0000036 K   | GHYTEGAELID E  |                                            |       |
| 0.0036 -      | MREILHIQGGCF   | Oxidation (M) 0.200000000000000000.0       |       |
| 0.000027 K    | LTPSPFGDLNF    | Oxidation (M) 0.000000000000000020000000.0 |       |
| 0.00000052 R  | SGPYGQTFRPIG   |                                            | emPAI |
| 0.000068 R    | YLTASAMFR G    |                                            |       |
| 0.0086 K      | IREEYPDR M     |                                            |       |
| 0.000003 K    | LAVNLIPFPR L   |                                            |       |
| 0.000011 R    | FPGQLNSDLR K   |                                            |       |
| 0.00000095 R  | VSEQFTAMFR R   |                                            |       |
| 0.000087 R    | KLAVNLIPFPR L  |                                            |       |
| 0.00031 K     | STVCDIPPTGL M  |                                            |       |
| 0.0000044 R   | YVGDSELQLEFV   |                                            |       |
| 0.000000035 R | MMMTFSVFP V    |                                            |       |
| 0.00000014 R  | VNVYYNEASCY    |                                            |       |
| 0.00000046 K  | EVDEQMLNVGN    | Oxidation (M) 0.000002000000.0             |       |
| 0.000000014 R | LHFFMVGAFAP G  | Oxidation (M) 0.00002000000000.0           |       |
| 0.0000075 R   | AVLMDLEPGT S   | 2 Oxidation (M) 0.000200000020000.0        |       |
| 0.0000011 K   | NSSYFVEWIPMS   |                                            |       |
| 0.00013 R     | NLTVPELTQQIN   | Oxidation (M) 0.000000000020000.0          |       |
| 1.8E-10 K     | FWEVVNLEHCY    |                                            |       |
| 8.5E-14 K     | MASTFIGNSTSR   | 2 Oxidation (M) 0.20000000000000200.0      |       |
| 4E-15 K       | GHYTEGAELID K  |                                            |       |
| 0.0000036 K   | GHYTEGAELID E  |                                            |       |
| 0.00017 K     | LSTPSFGDLNF    |                                            |       |
| 3.6E-09 R     | SGPYGQIFRPEG   |                                            | emPAI |
| 0.00000043 R  | YLTASAVFR G    |                                            |       |
| 0.0086 K      | IREEYPDR M     |                                            |       |
| 0.000003 K    | LAVNLIPFPR L   |                                            |       |
| 0.000011 R    | FPGQLNSDLR K   |                                            |       |
| 0.00000095 R  | VSEQFTAMFR R   |                                            |       |
| 0.000087 R    | KLAVNLIPFPR L  |                                            |       |
| 0.00016 R     | INVVFNEASGCY   |                                            |       |
| 0.000000035 R | MMMTFSVFP V    |                                            |       |
| 0.000000014 R | LHFFMVGAFAP G  | Oxidation (M) 0.00002000000000.0           |       |
| 0.00001 R     | AVLMDLEPGT S   | 2 Oxidation (M) 0.000200000020000.0        |       |
| 0.0000011 K   | NSSYFVEWIPMS   |                                            |       |
| 0.000000018 R | EILHIQGGQCCF   |                                            |       |
| 8.5E-14 K     | MASTFIGNSTSR   | 2 Oxidation (M) 0.20000000000000200.0      |       |
| 4E-15 K       | GHYTEGAELID K  |                                            |       |
| 0.0000036 K   | GHYTEGAELID E  |                                            |       |
| 0.0036 -      | MREILHIQGGCF   | Oxidation (M) 0.200000000000000000.0       |       |
| 0.00000099 R  | GSQQYSALSVIN   |                                            |       |
| 0.000000001 K | LANPTFGDLNIF   | Oxidation (M) 0.000000000000000020000000.0 |       |
| 0.000092 R    | SGPFGQIFRPEG   |                                            | emPAI |
| 0.0034 K      | FDLMYAK R      | Oxidation (M) 0.0002000.0                  |       |
| 0.000015 K    | DVNAAVGTIK T   |                                            |       |
| 0.0048 K      | EIVDLCLDR I    |                                            |       |
| 0.000088 K    | YMACCLMYR G    | Oxidation (M) 0.020000000.0                |       |
| 0.0046 R      | IDHKFDLMYAIR   | Oxidation (M) 0.00000002000.0              |       |
| 0.0061 R      | QLFHPEQLISGE   |                                            |       |
| 4.5E-09 R     | LVSQVISSLTASF  |                                            |       |
| 0.000000085 R | TIQFVDWCPT C   |                                            |       |
| 0.0000058 R   | SLSIERPTYTNL L |                                            |       |
| 0.000000041 R | AVFVDLEPTVI T  |                                            |       |
| 1.2E-09 R     | IHFMLSSYAPVA   |                                            |       |
| 1.6E-10 R     | AVCMISNSTSI    |                                            |       |
| 0.0000026 K   | CGINYQPPTVIV   |                                            |       |
| 7E-11 K       | TVGGGDDAFNH    |                                            |       |

|               |                |                                             |       |
|---------------|----------------|---------------------------------------------|-------|
| 0.0000058 R   | AFVHWYVGECE    | Oxidation (M) 0.000000000200000000.0        |       |
| 0.00000036 R  | QLFHPEQLISG G  |                                             |       |
| 9.9E-12 R     | FDGALNVDVT I   |                                             |       |
| 0.00000014 K  | AFHEQLSVAEI C  | 2 Oxidation (M) 0.00000000000000000002200.0 |       |
| 3.9E-11 R     | KLADNCTGLQ L   |                                             |       |
| 0.00061 K     | LGFTVYPSPQ\ R  |                                             | emPAI |
| 0.0034 K      | FDLMYAK R      | Oxidation (M) 0.0002000.0                   |       |
| 0.000015 K    | DVNAAVGTIK T   |                                             |       |
| 0.0048 K      | EIVDLCLDR I    |                                             |       |
| 0.000088 K    | YMACCLMYR G    | Oxidation (M) 0.020000000.0                 |       |
| 0.0046 R      | IDHKFDLMYAIR   | Oxidation (M) 0.00000002000.0               |       |
| 0.0061 R      | QLFHPEQLISG E  |                                             |       |
| 4.5E-09 R     | LVSQVISSLTAS F |                                             |       |
| 0.000000085 R | TIQFVDWCPT C   |                                             |       |
| 0.0000043 R   | SLNIERTYTN\ L  |                                             |       |
| 0.000000041 R | AVFVDLEPTVI T  |                                             |       |
| 1.2E-09 R     | IHFMLSSYAPV A  |                                             |       |
| 1.6E-10 R     | AVCMISNSTS\ I  |                                             |       |
| 0.0000026 K   | CGINYQPPTV\ V  |                                             |       |
| 7E-11 K       | TVGGGDDAF\ H   |                                             |       |
| 0.0000058 R   | AFVHWYVGECE    | Oxidation (M) 0.000000000200000000.0        |       |
| 0.00000036 R  | QLFHPEQLISG G  |                                             |       |
| 9.9E-12 R     | FDGALNVDVT I   |                                             |       |
| 0.00000014 K  | AFHEQLSVAEI C  | 2 Oxidation (M) 0.00000000000000000002200.0 |       |
| 3.9E-11 R     | KLADNCTGLQ L   |                                             |       |
| 0.00061 K     | LGFTVYPSPQ\ R  |                                             | emPAI |
| 0.002 R       | ALGDYQGVK V    |                                             |       |
| 0.000048 R    | ELAQQIEK V     |                                             |       |
| 0.003 R       | KVDWLTDK M     |                                             |       |
| 0.00065 R     | DELTLEGIK Q    |                                             |       |
| 0.0055 R      | GIYAYGFEK P    |                                             |       |
| 0.00000013 R  | VLITDLLAR G    |                                             |       |
| 0.000024 K    | VHACVGGTSV E   |                                             |       |
| 0.000096 K    | RDELTLEGIK Q   |                                             |       |
| 2.9E-10 K     | GLDVIQQAQS T   |                                             |       |
| 0.000000033 K | GVAINFVTLDI M  |                                             |       |
| 2.3E-10 R     | ILQAGVHV\ V    |                                             |       |
| 1.8E-11 R     | KGVAINFVTLE M  |                                             |       |
| 6.2E-10 K     | MFVLDEADEN G   | 2 Oxidation (M) 0.2000000002000.0           |       |
| 0.00017 K     | DQIYDIFQLLPI I |                                             |       |
| 3.4E-10 R     | GIYAYGFEKPS G  |                                             |       |
| 0.0002 K      | FYNV\ VEELPS - |                                             |       |
| 0.000086 R    | GFKDQIYDIFQ I  |                                             |       |
| 3.6E-10 K     | IQVGVFSATM K   | Oxidation (M) 0.000000000200000000.0        |       |
| 0.000000008 K | LETLCDLYETL\ R |                                             |       |
| 0.000000088 R | GIDVQQVSLVI I  |                                             |       |
| 0.000000045 K | TATFCSGVLQ\ CE |                                             | emPAI |
| 0.000051 R    | ALGDYLGVK V    |                                             |       |
| 0.000048 R    | ELAQQIEK V     |                                             |       |
| 0.000028 K    | GVAINFVTR D    |                                             |       |
| 0.003 R       | KVDWLTDK M     |                                             |       |
| 0.00065 R     | DELTLEGIK Q    |                                             |       |
| 0.0055 R      | GIYAYGFEK P    |                                             |       |
| 0.0006 R      | KGVAINFVTR D   |                                             |       |
| 0.00000013 R  | VLITDLLAR G    |                                             |       |
| 0.000024 K    | VHACVGGTSV E   |                                             |       |
| 0.000096 K    | RDELTLEGIK Q   |                                             |       |
| 2.9E-10 K     | GLDVIQQAQS T   |                                             |       |

|               |                 |                                                         |
|---------------|-----------------|---------------------------------------------------------|
| 2.3E-10 R     | ILQAGVHVVV V    |                                                         |
| 6.2E-10 K     | MFVLDEADEN G    | 2 Oxidation (M) 0.2000000002000.0                       |
| 0.00017 K     | DQIYDIFQLLPI I  |                                                         |
| 3.4E-10 R     | GIYAYGFEKPS G   |                                                         |
| 0.0002 K      | FYNVVVEELPS -   |                                                         |
| 0.000086 R    | GFKDQIYDIFQ I   |                                                         |
| 3.6E-10 K     | IQVGVFSATM K    | Oxidation (M) 0.0000000002000000000.0                   |
| 0.00000008 K  | LETLCDLYETL R   |                                                         |
| 0.000000088 R | GIDVQQVSLVI I   |                                                         |
| 0.00054 K     | LNEVLEGQDEI G   | 3 Methyl (DE) 0.001001001000000000000000020000000 emPAI |
| 0.0000016 R   | VEIANDQGNIT     |                                                         |
| 0.0000091 K   | DAGVIAGLNV I    | Oxidation (M) 0.000000000020.0                          |
| 0.0032 R      | MVNHVFQEFI R    | Oxidation (M) 0.2000000000.0                            |
| 0.000024 R    | EIAEAYLGVTIK N  |                                                         |
| 0.00001 R     | FEELNMDLFR K    | Oxidation (M) 0.0000020000.0                            |
| 0.0000042 K   | NALENYAYNV N    | Oxidation (M) 0.00000000020.0                           |
| 0.00019 K     | ELESICNPIAK M   |                                                         |
| 0.00000075 K  | STVHDVVVLVG I   |                                                         |
| 0.000000092 K | VQQLLQDFFN E    |                                                         |
| 0.0000014 R   | TTPSYVAFTDS L   |                                                         |
| 0.0068 R      | ARFEELNMDL K    | Oxidation (M) 0.000000020000.0                          |
| 0.00000017 K  | EFAAEEISSMV M   |                                                         |
| 1.2E-09 K     | NQVAMNPVN R     | Oxidation (M) 0.000020000000000.0                       |
| 7.1E-09 K     | ATAGDTHLGG M    |                                                         |
| 0.004 K       | NAVVTVPAYFI Q   |                                                         |
| 9.7E-11 K     | SINPDEAVAYC V   |                                                         |
| 0.00018 K     | GEGPAIGIDL G    |                                                         |
| 4.5E-09 K     | EQVFSTYSDN( A   |                                                         |
| 0.00017 K     | IEDSIEQAIQW M   |                                                         |
| 0.00023 R     | TLSSTAQTIEI A   |                                                         |
| 0.00098 K     | VQDLLLLDVTFN    | Oxidation (M) 0.000000000000000000000002000000.0        |
| 0.000000042 K | KIEDSIEQAIQV M  | emPAI                                                   |
| 0.004 R       | ALFELLK L       |                                                         |
| 0.000039 K    | TSLILALGK Y     |                                                         |
| 0.002 K       | LALETFSVR C     |                                                         |
| 0.0000002 K   | ALSGLQFLLCK V   |                                                         |
| 0.0052 K      | GLLYQPAYDPI H   |                                                         |
| 5.4E-09 K     | SLFESLNSVGV R   |                                                         |
| 0.00024 K     | VAAFPCFTSILS G  |                                                         |
| 0.000000015 R | VFACQNPSTQ K    |                                                         |
| 0.000019 K    | LLAENLNCLLN D   |                                                         |
| 4.7E-09 K     | TATVAQILENV D   |                                                         |
| 7.6E-10 R     | LFLEENLASIFA D  |                                                         |
| 0.0000012 R   | DAVWCGIQIL( C   |                                                         |
| 0.00021 R     | SLLSFIEILPIAC A |                                                         |
| 0.000088 K    | MDGIQNLISLI L   | Oxidation (M) 0.2000000000000000000.0                   |
| 0.00000004 R  | QSYGSNPLQQ F    |                                                         |
| 0.000013 K    | MNYLDSFPFP' D   | Oxidation (M) 0.20000000000000000.0                     |
| 0.000019 R    | ALHFNTSLLGS A   |                                                         |
| 3.9E-11 K     | QLFDNITAMLIT    | Oxidation (M) 0.0000000020000000000.0                   |
| 0.0045 K      | LPISDLLEPIISL V |                                                         |
| 0.00000029 K  | ESNVVDPIINF' L  |                                                         |
| 5.8E-09 K     | ALYDGFSMFFI I   | Oxidation (M) 0.00000002000000000000.0                  |
| 0.0011 R      | GGHWIVLDEL L    | emPAI                                                   |
| 0.0000027 R   | FTDSSVQSDIK L   |                                                         |
| 0.0000016 R   | VEIANDQGNIT     |                                                         |
| 0.0000091 K   | DAGVIAGLNV I    | Oxidation (M) 0.000000000020.0                          |
| 0.0032 R      | MVNHVFQEFI R    | Oxidation (M) 0.2000000000.0                            |

|            |   |              |   |                                            |
|------------|---|--------------|---|--------------------------------------------|
| 0.00013    | R | FEELNIDLFR   | K |                                            |
| 0.000072   | R | EIAEAYLGTTIK | N |                                            |
| 0.0000042  | K | NALENYAYNV   | N | Oxidation (M) 0.00000000020.0              |
| 0.00019    | K | ELESICNPIAK  | M |                                            |
| 1.2E-09    | K | VQQLLVDFFN   | E |                                            |
| 0.00000064 | K | NSIDDVVLVGC  | I |                                            |
| 0.0000014  | R | TTPSYVAFTDS  | L |                                            |
| 0.00041    | R | ARFEELNIDLFI | K |                                            |
| 7.1E-09    | K | ATAGDTHLGG   | M |                                            |
| 2.2E-09    | K | NQVAMNPIN    | R | Oxidation (M) 0.00002000000000.0           |
| 0.004      | K | NAVVTVPAYFI  | Q |                                            |
| 4.6E-14    | K | SINPDEAVAYC  | V |                                            |
| 0.00018    | K | GEGPAIGIDL   | V |                                            |
| 4.5E-09    | K | EQVFSTYSDN   | A |                                            |
| 0.00071    | K | VQDLLLDVTF   | N |                                            |
| 0.00000035 | K | KIEDSIEAAIEM | M | emPAI                                      |
| 0.0011     | K | SSVCDIAPR    | G |                                            |
| 0.000068   | R | YLTASAMFR    | G |                                            |
| 0.0086     | K | IREEYPDR     | M |                                            |
| 0.000003   | K | LAVNLIPFPR   | L |                                            |
| 0.000011   | R | FPGQLNSDLR   | K |                                            |
| 0.00000095 | R | VSEQFTAMFR   | R |                                            |
| 0.000087   | R | KLAVNLIPFPR  | L |                                            |
| 0.00000047 | R | YVGNSDLQLEI  | V |                                            |
| 0.00000035 | R | MMLTFSVFPS   | V | 2 Oxidation (N) 0.220000000000.0           |
| 0.00000014 | R | VNVYYNEASC   | Y |                                            |
| 0.00000046 | K | EVDEQMINVC   | N | Oxidation (M) 0.000002000000.0             |
| 0.00000014 | R | LHFFMVGAF    | G | Oxidation (M) 0.00002000000000.0           |
| 0.0000011  | K | NSSYFVEWIP   | S |                                            |
| 1E-14      | K | GHYTEGAELI   | K |                                            |
| 0.000027   | K | LTTSPFGDLN   | F | Oxidation (M) 0.000000000000000020000000.0 |
| 0.000011   | R | TGPYGQIFRPI  | G | emPAI                                      |
| 0.000031   | R | DGYLTLFK     | F |                                            |
| 0.0075     | R | ALADPNTDVR   | G |                                            |
| 0.0000041  | R | VLPLIIPILSK  | G |                                            |
| 0.00000013 | K | LSILSAVASWA  | S |                                            |
| 0.00000035 | K | DLPVMTFLIS   | A |                                            |
| 7.2E-09    | R | SPIVSAAFEN   | L |                                            |
| 0.00000055 | R | QSSVELLDLL   | V |                                            |
| 0.00093    | K | YALELLPVILP  | C |                                            |
| 0.00000029 | R | SQLLSFMDQLI  | T |                                            |
| 5.4E-10    | K | SGPLPVDTF    | F |                                            |
| 1.7E-12    | R | VVLVIDEEGVE  | G |                                            |
| 0.000018   | R | NPDTISQISDLI | T |                                            |
| 0.000064   | K | SLKPLLPVFLQ  | E |                                            |
| 9E-10      | K | VVIDVLSSIVS  | R |                                            |
| 0.00000024 | K | NPEISSLVPTLL | H |                                            |
| 0.00013    | R | HALDTLLQTTF  | G | emPAI                                      |
| 0.000068   | R | YLTASAMFR    | G |                                            |
| 0.0086     | K | IREEYPDR     | M |                                            |
| 0.000003   | K | LAVNLIPFPR   | L |                                            |
| 0.000011   | R | FPGQLNSDLR   | K |                                            |
| 0.00000095 | R | VSEQFTAMFR   | R |                                            |
| 0.000087   | R | KLAVNLIPFPR  | L |                                            |
| 0.0000036  | R | YNGDSADLQL   | I |                                            |
| 0.00000035 | R | MMLTFSVFPS   | V | 2 Oxidation (N) 0.220000000000.0           |
| 0.00000014 | R | LHFFMVGAF    | G | Oxidation (M) 0.00002000000000.0           |
| 0.00001    | R | AVLMDLEPGT   | S | 2 Oxidation (N) 0.000200000020000.0        |

|               |                 |                                        |
|---------------|-----------------|----------------------------------------|
| 0.000011 K    | NSSYFVEWIPMS    |                                        |
| 1E-14 K       | GHYTEGAELIDK    |                                        |
| 3.6E-09 R     | SGPYGQIFRPG     | emPAI                                  |
| 0.000037 K    | VGAFSVLR E      |                                        |
| 0.0024 R      | TTSPAAFTR A     |                                        |
| 0.00016 K     | IDLDLEVR L      |                                        |
| 0.000015 K    | CLAGLIVSR S     |                                        |
| 0.00031 K     | VLPQALTLVK S    |                                        |
| 0.000068 K    | HVVDDGLELR K    |                                        |
| 0.0000054 K   | ALSSPVLAAVCY    |                                        |
| 0.000035 R    | TNIQMIGALCF A   | Oxidation (M) 0.00002000000.0          |
| 0.00013 R     | AELPSCLPVLV M   |                                        |
| 0.00000019 K  | MDVFNTFIDLIQ    |                                        |
| 0.00000063 R  | EYSLQALESFLI C  |                                        |
| 0.000039 K    | LLNTLLQLGC K    |                                        |
| 0.0000061 K   | CPSAVLAVLDS T   |                                        |
| 5.5E-12 K     | TVTCIASLASSL A  |                                        |
| 0.0000012 K   | LDEIIFPQISSFL D |                                        |
| 1.1E-12 R     | LSSIILQQLDD\ C  |                                        |
| 0.0029 R      | ELVVVLPDCLA A   |                                        |
| 0.000036 K    | DLSAHAGIETI\ S  |                                        |
| 0.00017 K     | SAASYALGNIA K   | emPAI                                  |
| 0.000082 K    | FEAIIYVLK K     |                                        |
| 0.00027 K     | TVGAGVIGTIL -   |                                        |
| 2.9E-09 K     | VGETVDLVGLI E   |                                        |
| 0.0000017 R   | SYTVTGVEMF I    |                                        |
| 5E-11 K       | ILDEALAGDN\ G   |                                        |
| 0.000029 R    | HYAHVDCPG\ N    |                                        |
| 4.9E-10 R     | GITINTATVEYI H  |                                        |
| 0.00022 K     | IVVELIVPVAC\ F  | Oxidation (M) 0.0000000000000020.0     |
| 0.00000016 K  | TTLTAALTMAI K   |                                        |
| 0.000000021 K | IYELMDAVDD\ Q   | Oxidation (M) 0.00002000000000000.0    |
| 5.5E-12 K     | EDQVDDAELL E    |                                        |
| 2.3E-10 R     | QTELPFLAVE G    |                                        |
| 0.000037 K    | WVDKIYELMC Q    |                                        |
| 0.0059 R      | ELLSSYEFNGD V   | emPAI                                  |
| 0.0034 K      | FDLMYAK R       | Oxidation (M) 0.0002000.0              |
| 0.000015 K    | DVNAAVGTIK T    |                                        |
| 0.0048 K      | EIVDLCLDR V     |                                        |
| 0.000088 K    | YMACCLMYR G     | Oxidation (M) 0.020000000.0            |
| 0.0046 R      | IDHKFDLMYAI R   | Oxidation (M) 0.00000002000.0          |
| 0.0061 R      | QLFHPEQLISG E   |                                        |
| 3.6E-11 R     | LISQISSLTSL F   |                                        |
| 0.0000024 R   | TVQFVDWCP\ C    |                                        |
| 0.000047 R    | SLDIERPTYTNI L  |                                        |
| 0.000000041 R | AVFVDLEPTVI T   |                                        |
| 0.000000017 R | IHFMLSSYAPV A   | Oxidation (M) 0.0002000000000000.0     |
| 0.0000026 K   | CGINYQPPTV\ V   |                                        |
| 0.0000058 R   | AFVHWYVGE\ E    | Oxidation (M) 0.00000000002000000000.0 |
| 0.00000036 R  | QLFHPEQLISG G   |                                        |
| 3.7E-10 R     | FDGAINVDITE I   |                                        |
| 3.9E-11 R     | KLADNCTGLQ L    | emPAI                                  |
| 0.0004 K      | VTVMDTLSR L     | Oxidation (M) 0.000200000.0            |
| 0.0045 R      | TCNYLTSAAAR Y   |                                        |
| 0.000000021 R | VGQAVDVVGV\ P   |                                        |
| 0.00032 R     | MLQYGEQNIR R    | Oxidation (M) 0.2000000000.0           |
| 0.000013 K    | QESVEATAEV\ T   |                                        |
| 0.000015 R    | NLAGEIAQEQYTR   |                                        |

|               |                  |                                              |       |
|---------------|------------------|----------------------------------------------|-------|
| 2.4E-09 R     | FLPLGLGLLYLQ     |                                              |       |
| 0.00058 K     | AFHETMADSC Y     | Oxidation (M) 0.0000020000000.0              |       |
| 0.00000018 R  | AVPLALGLLCLV     |                                              |       |
| 0.00024 K     | YIPLSPILEGFIII E |                                              |       |
| 0.0045 R      | MMLTVDENLIV      | 2 Oxidation (M) 0.22000000000000000.0        |       |
| 0.000000026 K | YLSDILSVLALT E   |                                              |       |
| 3E-11 R       | QNLAATFVNA L     |                                              |       |
| 0.00014 R     | AELATDKYIPL E    |                                              |       |
| 0.0000016 K   | NDCDPALALLCI     |                                              |       |
| 0.007 R       | QSEASIDDLV H     | Oxidation (M) 0.000000000000000000020.0      |       |
| 0.00000015 K  | HNAETEAVDL T     | Oxidation (M) 0.000000000020000000000000.0   |       |
| 0.00096 R     | IGINGFGR I       |                                              |       |
| 0.0024 K      | AATYDEIKK A      |                                              |       |
| 0.0000031 R   | VVDLIVHMSK A     |                                              |       |
| 0.009 R       | AASFNIIPSSTG A   |                                              |       |
| 4.5E-11 R     | VPTVDVSVVD L     |                                              |       |
| 0.000019 K    | TLLFGEKPVTV N    |                                              |       |
| 0.000093 K    | DAPMFVGVIS       | Oxidation (M) 0.000200000000000.0            |       |
| 0.0000006 K   | LVSWYDNEWV       |                                              |       |
| 6.1E-12 R     | FGIVEGLMTT T     |                                              |       |
| 8.5E-14 K     | GILGYTEDDV S     |                                              |       |
| 3.8E-14 K     | SDLDIVSNASC V    |                                              |       |
| 0.00063 R     | NPEDIPWGEE A     |                                              | emPAI |
| 0.0083 R      | YDEIK E          |                                              |       |
| 0.000041 R    | QTVAVGVIK S      |                                              |       |
| 0.0000011 K   | IGGIGTVPVGR V    |                                              |       |
| 0.0012 R      | STNLDWYK G       |                                              |       |
| 0.00035 K     | STTTGHLIYK L     |                                              |       |
| 7.9E-10 R     | EHALLAFTLG VQ    |                                              |       |
| 0.00000071 K  | YYCTVIDAPG D     |                                              |       |
| 0.000068 K    | FHINIVVIGHV S    |                                              |       |
| 0.00000011 K  | GPTLLEALDQI R    |                                              |       |
| 0.00012 K     | PGMVVTFAPTS      | Oxidation (M) 0.00200000000000000.0          |       |
| 0.000035 K    | MTPTKPMVVI F     | 2 Oxidation (M) 0.20000020000000000000.0     |       |
| 0.000038 R    | VETGMIKPGV S     |                                              |       |
| 2.5E-12 K     | NMITGTSQAD D     | Oxidation (M) 0.02000000000000000000000000.0 |       |
| 0.000051 R    | ALGDYLGVK A      |                                              |       |
| 0.000048 R    | ELAQQIEK V       |                                              |       |
| 0.003 R       | KVDWLTDK M       |                                              |       |
| 0.00065 R     | DELTLEGIK Q      |                                              |       |
| 0.0055 R      | GIYAYGFEK P      |                                              |       |
| 0.00000013 R  | VLITDLLAR G      |                                              |       |
| 0.000096 K    | RDELTLEGIK Q     |                                              |       |
| 2.9E-10 K     | GLDVIQQAQS T     |                                              |       |
| 6.2E-10 K     | MFVLDEADEN G     | 2 Oxidation (M) 0.2000000002000.0            |       |
| 3.4E-10 R     | GIYAYGFEKPS G    |                                              |       |
| 0.0002 R      | FYNVVVEELPS -    |                                              |       |
| 0.000000012 K | VQVGVFSATV K     | Oxidation (M) 0.0000000002000000000.0        |       |
| 0.000000008 K | LETLCDLYETL R    |                                              |       |
| 0.000000088 R | GIDVQQVSLVI I    |                                              | emPAI |
| 0.0086 K      | LGVRPPK G        |                                              |       |
| 0.0028 R      | ILQHSR K         |                                              |       |
| 0.0093 R      | ADILDPALMR S     | Oxidation (M) 0.0000000020.0                 |       |
| 0.0024 K      | GVLLYGPPGT T     |                                              |       |
| 0.000019 R    | STDDFNQAQL A     |                                              |       |
| 0.000029 R    | ACAAQTNATF L     |                                              |       |
| 0.0000029 K   | AVCVEAGML R      | Oxidation (M) 0.000000020000.0               |       |
| 0.000011 K    | LAGPQLVQMFL      |                                              |       |



|               |               |                                                    |       |
|---------------|---------------|----------------------------------------------------|-------|
| 0.00000015 R  | AVAGAGVLAC L  |                                                    |       |
| 0.000048 K    | SSFDAFSQIVK K |                                                    |       |
| 0.0000031 K   | LLIQNQDEMLI A | Oxidation (M) 0.00000000200.0                      |       |
| 0.0044 R      | TIRDEGIGSLW G |                                                    |       |
| 0.00000054 R  | YFPTQALNFAFD  |                                                    |       |
| 0.00000026 R  | GFNISCAGIIVYG |                                                    |       |
| 1.7E-10 K     | GFTNFAIDFMIT  |                                                    |       |
| 1.4E-13 K     | WFAGNLASGCT   |                                                    | emPAI |
| 0.0068 K      | RGILTLK Y     |                                                    |       |
| 0.00000021 K  | AGFAGDDAPFA   |                                                    |       |
| 0.009 K       | EITALAPSSMKI  | Oxidation (M) 0.00000000020.0                      |       |
| 0.00002 R     | GYMFTTTAER E  | Oxidation (M) 0.0020000000.0                       |       |
| 0.0000024 K   | SEYDESGPSIVIK |                                                    |       |
| 0.0003 K      | IWHHTFYNELIV  |                                                    |       |
| 1.9E-10 K     | NYELPDGQVITF  |                                                    |       |
| 5.5E-11 K     | LAYVALDYEQFS  |                                                    |       |
| 0.0000014 K   | YPIEHGIVSNWI  | Oxidation (M) 0.00000000000000200.0                |       |
| 0.0000001 R   | VAPEEHPVLLTA  |                                                    |       |
| 4.6E-11 K     | DLYGNIVLSGCM  | Oxidation (M) 0.0000000000000020000000.0           |       |
| 0.0000001 R   | TTGIVLDSGDC L |                                                    |       |
| 0.00006 R     | CPEVLFQPSLICC | 2 Oxidation (M) 0.000000000000002000000000000000.0 | emPAI |
| 0.0082 R      | VQQLDVR C     |                                                    |       |
| 0.00049 R     | QAIVDGLR N    |                                                    |       |
| 0.0000099 K   | YLSGMGIAR Q   | Oxidation (M) 0.000020000.0                        |       |
| 0.0000019 K   | LDLDSTFEQK N  |                                                    |       |
| 0.0000053 R   | ALAESAQDAFL   |                                                    |       |
| 0.000019 K    | SNSVFIPHGPE D |                                                    |       |
| 0.00000019 R  | NQIQAYVFDV A  |                                                    |       |
| 1.1E-09 R     | NSVLAFSESVP D |                                                    |       |
| 4.3E-13 K     | DVMDMVLVTE    |                                                    |       |
| 0.000075 K    | AMSHYGYEIVIR  | Oxidation (M) 0.020000000000000000000000.0         | emPAI |
| 0.000071 K    | KPDVDIEK I    |                                                    |       |
| 0.000000062 R | ADIVVDVLVK N  |                                                    |       |
| 0.000085 K    | PTADVSAIHIPI  |                                                    |       |
| 0.0002 K      | VKDFIHDIGEK L |                                                    |       |
| 0.0000015 K   | IPLTLIYDDIK S |                                                    |       |
| 0.00000097 K  | DFGSALWDM G   |                                                    |       |
| 0.00000038 K  | GNIDVDTPFG L  | Oxidation (M) 0.00000000000020.0                   |       |
| 0.00000023 R  | VVHQEGDVEIS   |                                                    |       |
| 0.0000013 K   | FSLEETVAILHL  |                                                    |       |
| 0.000041 R    | IKVDLIVDVPV L |                                                    |       |
| 0.000026 K    | STYNDINPGMI   | Oxidation (M) 0.0000000000200000.0                 |       |
| 0.00002 K     | LEGTIGFGKPT I |                                                    |       |
| 1.6E-10 K     | NPNPVPIPLID K |                                                    |       |
| 0.00038 R     | VVQILAR R     |                                                    |       |
| 0.0009 K      | AEIANVLSR G   |                                                    |       |
| 0.00063 K     | TAIAEGLAQR I  |                                                    |       |
| 0.0014 R      | LDEMIVFR Q    | Oxidation (M) 0.00020000.0                         |       |
| 0.000028 R    | HAQLPEEAR E   |                                                    |       |
| 0.007 K       | EIELQVTER F   |                                                    |       |
| 0.000079 R    | VLELSLEEAR Q  |                                                    |       |
| 0.000000018 K | AIDLIDEAGSR V |                                                    |       |
| 0.0000024 K   | LAEEGKLDPV Q  |                                                    |       |
| 0.00013 R     | VLENLGADPSIT  |                                                    |       |
| 0.000017 R    | GSGFVAVEIPFA  |                                                    |       |
| 0.0000014 K   | MPTLEEYGTN L  | Oxidation (M) 0.2000000000000.0                    |       |
| 1E-10 K       | VPEPTVEEAIQE  |                                                    |       |
| 0.0024 K      | NPNRPIASFIF S |                                                    |       |

|             |   |               |   |                                                      |
|-------------|---|---------------|---|------------------------------------------------------|
| 4.6E-09     | K | AHPDVFNMML    |   |                                                      |
| 0.00014     | R | QLGHNYIGSEI   |   |                                                      |
| 0.000000021 | R | LGHNFGTEQV    |   |                                                      |
| 0.0099      | R | QSDEIILFIDEV  |   | emPAI                                                |
| 0.0028      | R | ILQIHSR       | K |                                                      |
| 0.0093      | R | ADILDPALMR    | S | Oxidation (M) 0.000000020.0                          |
| 0.0024      | K | GVLLYGPPGT    | T |                                                      |
| 0.000019    | R | STDDFNQAQL    | A |                                                      |
| 0.000029    | R | ACAAQTNATF    | L |                                                      |
| 0.0000029   | K | AVCVEAGML     | R | Oxidation (M) 0.00000020000.0                        |
| 0.000011    | K | LAGPQLVQMF    | L |                                                      |
| 0.00015     | K | QIQELVEAIVLIE |   | Oxidation (M) 0.000000000002000.0                    |
| 0.000001    | K | DSYLIDTLPSEV  |   |                                                      |
| 9.4E-14     | R | TMLELLNQLD    | I | Methyl (DE); (0.02000000000000010.0                  |
| 0.0000024   | R | DATEVNHEDF    | K |                                                      |
| 0.0000019   | K | AMEVDEKPTQ    |   | Oxidation (M) 0.020000000000000000.0                 |
| 0.00019     | K | QLPYLVGNIVE   | K | 2 Methyl (DE) 0.000000000000020001100000000000 emPAI |
| 0.0014      | R | LSYALAR       | S |                                                      |
| 0.002       | R | SSGFGDFGSDIS  |   |                                                      |
| 0.00062     | R | SSFGGFGSND    | R |                                                      |
| 0.00063     | K | TLAFGIPIIDK   | I |                                                      |
| 0.0000068   | R | GSASMFEGIG    | S | Oxidation (M) 0.00002000000.0                        |
| 0.0042      | R | FTELPSIAVER   | G |                                                      |
| 2.1E-09     | K | CEALHGDISQ    | E |                                                      |
| 0.003       | R | DGHFNILVATI   | G |                                                      |
| 0.000041    | R | QSMMSFATMS    |   | 3 Oxidation (M) 0.00220000200000.0                   |
| 0.00000007  | K | LADGITYYSIA   | A |                                                      |
| 5.9E-12     | K | YLNPLTVDL     | L |                                                      |
| 0.00000095  | R | ESAPSLDTICLY  | Q | Oxidation (M) 0.000000000000000000020.0              |
| 0.00000012  | R | VGDSSESVGGD   | A |                                                      |
| 0.000067    | R | RVGDSSESVGG   | A | emPAI                                                |
| 0.00025     | R | GALANLFK      | A |                                                      |
| 0.0095      | K | GVEYLIANK     | L |                                                      |
| 0.0019      | R | FMDNLFLR      | N | Oxidation (M) 0.02000000.0                           |
| 0.000027    | R | NPASVAQFLR    | S |                                                      |
| 2.8E-09     | R | GGLVSILNLGL   | R |                                                      |
| 0.0014      | K | GSSLQCLVNVIS  |   |                                                      |
| 3.5E-11     | K | VTSAEVAQQA    | S |                                                      |
| 5.5E-11     | R | NCALELVFDLL   | G |                                                      |
| 4.9E-12     | R | DASYTTQPLEL   | K |                                                      |
| 0.000000011 | K | LPSESVVEFFT   | Q |                                                      |
| 0.00028     | R | MNATNDPEDI    | L | Oxidation (M) 0.2000000000000000000000000000.0 emPAI |
| 0.00000012  | K | VPLILGIWGG    | K |                                                      |
| 2.7E-09     | R | GLAYDTSDDQ    | G |                                                      |
| 0.000022    | R | EGPPVFEQPEI   | L | Oxidation (M) 0.00000000020000.0                     |
| 2.1E-13     | R | VPIICTGNDFS   | D |                                                      |
| 4E-15       | R | VQLAETYLSQ    | G |                                                      |
| 0.000000046 | K | IKDEDIVTLVDI  | A | emPAI                                                |
| 0.00000059  | R | TGGGGLDLSSI   | R |                                                      |
| 0.0021      | R | KPTFPSSR      | A |                                                      |
| 0.0000098   | R | ELLAQGVSSQSI  | Y |                                                      |
| 0.000036    | R | LQSLAFQLTEK   | L |                                                      |
| 0.000015    | R | TMAQLGLCAF    | A | Oxidation (M) 0.02000000000.0                        |
| 0.000000065 | R | VWGNLVAFLE    | V |                                                      |
| 0.000042    | R | AMMDILVSLI    | N |                                                      |
| 0.0000067   | R | FELVDQLTHLT   | I |                                                      |
| 0.000000041 | K | AFEVLNSLEV    | L |                                                      |
| 0.00000034  | K | CVLNMLTILDI   | Y |                                                      |

|             |   |                |                                             |       |
|-------------|---|----------------|---------------------------------------------|-------|
| 0.00000016  | K | TLVMLEDFLNIE   | Oxidation (M) 0.0002000000000000.0          |       |
| 0.00000011  | R | LRDEPMFLALM    | Oxidation (M) 0.0000020000000000000.0       | emPAI |
| 0.00066     | R | VVGSELIQK Y    |                                             |       |
| 0.0085      | K | GVILYGEPGTCT   |                                             |       |
| 0.000028    | K | AVANSTSATFLV   |                                             |       |
| 0.000068    | K | AICTEAGLLALIE  |                                             |       |
| 4.9E-12     | R | TMLELLNQLD G   |                                             |       |
| 0.000022    | R | IKDYLLMEEEF L  | Oxidation (M) 0.00000020000000000.0         |       |
| 1.6E-11     | K | APLESYADIGGE   |                                             |       |
| 0.0000003   | K | VLSVVGILQDEV   | 2 Oxidation (M) 0.000000000000000200020.0   |       |
| 0.00000011  | R | VADDLSPSIVF R  |                                             | emPAI |
| 0.00063     | K | TAIAEGLAQR I   |                                             |       |
| 0.0014      | R | LDEMIVFR Q     | Oxidation (M) 0.00020000.0                  |       |
| 0.007       | K | EIELQVTER F    |                                             |       |
| 0.000079    | R | VLELSLEEAR Q   |                                             |       |
| 0.00000018  | K | AIDLIDEAGSR V  |                                             |       |
| 0.0000024   | K | LAEEGKLDPV Q   |                                             |       |
| 0.00013     | R | VLENLGADPSIT   |                                             |       |
| 0.000022    | R | VVDEGYNPSY P   |                                             |       |
| 0.000017    | R | GSGFVAVEIPF A  |                                             |       |
| 0.0000014   | K | MPTLEEYGTN L   | Oxidation (M) 0.2000000000000.0             |       |
| 0.0024      | K | NPNRPIASFIF S  |                                             |       |
| 4.6E-09     | K | AHPDVFNMML     |                                             |       |
| 0.00014     | R | QLGHNYIGSEI E  |                                             |       |
| 0.000000021 | R | LGHNFVGTQV     |                                             |       |
| 0.0099      | R | QSDEIILFIDEV G |                                             | emPAI |
| 0.0068      | R | INAEDPFK G     |                                             |       |
| 0.0057      | K | LILDVEDFK N    |                                             |       |
| 0.00053     | K | FGNVVHFGER D   |                                             |       |
| 0.0055      | R | YKQEDIVLR G    |                                             |       |
| 0.00051     | R | HIEFQVLADK F   |                                             |       |
| 0.000073    | R | VANEIGFPVM A   | Oxidation (M) 0.000000000200.0              |       |
| 0.0000056   | K | LLEEAPSPALT K  |                                             |       |
| 7.2E-10     | K | SEAAAAFGND F   |                                             |       |
| 1.2E-10     | K | HEEELAEPQEI D  |                                             |       |
| 0.00021     | R | ALNDTIITGVP L  |                                             |       |
| 5.1E-09     | K | NAGVPTVPGS V   |                                             |       |
| 0.0000063   | R | IQVEHPVTEM V   | Oxidation (M) 0.000000000200000000000.0     |       |
| 0.0000019   | K | AMGDAAVAA G    | Oxidation (M) 0.0200000000000000000000000.0 |       |
| 0.00078     | R | KAMGDAAVA G    | Oxidation (M) 0.0020000000000000000000000.0 | emPAI |
| 0.0002      | K | GELLVGTAK R    |                                             |       |
| 0.00000056  | K | VQEIVSEIFGK S  |                                             |       |
| 0.00032     | R | SSGGLSDDEIN M  |                                             |       |
| 0.000023    | K | MKETAEAYLG S   | Oxidation (M) 0.20000000000.0               |       |
| 0.00016     | R | TAMAGEDVEI A   | Oxidation (M) 0.002000000000.0              |       |
| 0.000048    | K | FSPSQIGANVL M  |                                             |       |
| 0.0000021   | K | EVDEVLLVGGIV   | Oxidation (M) 0.0000000000200.0             |       |
| 0.0000018   | R | QAVTNPTNTIIF R |                                             |       |
| 2.7E-11     | K | IPAEIASEIETA T |                                             |       |
| 0.0000014   | R | IINEPTAAALS YE | Oxidation (M) 0.00000000000002000.0         |       |
| 0.00000069  | K | SQVFSTAADN V   | Oxidation (M) 0.00000000000200000.0         | emPAI |
| 0.0067      | R | FFAFGR V       |                                             |       |
| 0.0098      | K | FGVVESK M      |                                             |       |
| 0.007       | K | SDPVVSFR E     |                                             |       |
| 0.0037      | R | IRPVLTVNK M    |                                             |       |
| 0.0041      | R | RVIYASQITAK P  |                                             |       |
| 0.0000025   | R | LWGENFFDPA K   |                                             |       |
| 3.2E-10     | R | PMEEGLAEAI I   | Oxidation (M) 0.02000000000000.0            |       |

|               |                |                                            |       |
|---------------|----------------|--------------------------------------------|-------|
| 0.000001 K    | DLQDDFMGG.S    | Oxidation (M) 0.0000002000000.0            |       |
| 0.000061 K    | AYLPVVESFGF.A  |                                            |       |
| 1E-10 K       | STLTDSLVAAM    |                                            |       |
| 0.0041 R      | YRVENLYEGPL.N  |                                            |       |
| 7.2E-11 R     | DGNEYLINLID.I  |                                            | emPAI |
| 0.00000045 K  | IQTVIQAGVVF.L  |                                            |       |
| 0.00063 R     | NATWTLNFC.G    |                                            |       |
| 3.5E-09 R     | SPPIEEVISAGV.F |                                            |       |
| 3.5E-10 R     | IITVCLEGLENI.V |                                            |       |
| 1.3E-12 R     | EQAVWALGN'.C   |                                            |       |
| 0.00000024 K  | LVELLLHHSPS'.T |                                            |       |
| 0.000034 R    | LIHSDDEEVLTI   |                                            | emPAI |
| 0.0063 R      | VPPEVMESIR.K   | Oxidation (M) 0.0000020000.0               |       |
| 0.000046 R    | HENVDIVVIR.E   |                                            |       |
| 0.00021 R     | HLQFPSFADR.L   |                                            |       |
| 0.00000087 K  | LADGLFLESCR.E  |                                            |       |
| 0.0000014 K   | YAFEYAYLNNF.K  |                                            |       |
| 4.6E-10 K     | TPVGGGVSSLI.K  |                                            |       |
| 0.000042 K    | ANPVALLSSA.H   |                                            |       |
| 0.000037 K    | DLGGTSTTQE'.L  |                                            |       |
| 0.00085 R     | TKDLGGTSTTCL   |                                            |       |
| 0.0000012 K   | ELDLFASLVNC.H  |                                            | emPAI |
| 0.000088 K    | STVVNTHLMP.S   | Oxidation (M) 0.00000000200.0              |       |
| 1.7E-10 K     | AADQGLVILQ'.R  |                                            |       |
| 0.000000005 R | EDGEPPVGYND.K  |                                            |       |
| 1.2E-11 K     | SSEVEALISEITIL |                                            |       |
| 0.000075 K    | ILREDGEPVGY.K  |                                            |       |
| 5.7E-09 K     | EGQVLCYIEQL.I  |                                            |       |
| 0.0099 R      | KLTDESSPPQT    |                                            | emPAI |
| 0.00057 R     | SGAVASAVMk.K   |                                            |       |
| 0.0019 K      | ISWVPDPK.T     |                                            |       |
| 7.4E-11 R     | GYAATAAQGS.S   |                                            |       |
| 8.4E-13 R     | PETGSNEIDAA.A  | Methyl (DE) 0.01000000000000.0             |       |
| 0.000000018 K | TGYRPPETGSA.A  | Methyl (DE) 0.000000100000000000.0         | emPAI |
| 0.000012 K    | TLVLALATGNk.K  |                                            |       |
| 0.00021 K     | VVSAMVNND.S    | Oxidation (M) 0.00002000000.0              |       |
| 0.00013 K     | EAVDQCITANIM   |                                            |       |
| 0.005 R       | TTFVPSTPPAL.N  |                                            |       |
| 0.000012 K    | IPGVISASSFD.CI |                                            |       |
| 0.000016 K    | IGIYNIEGCSR.Y  |                                            |       |
| 0.0000015 R   | LFNETSEALGGA   |                                            |       |
| 0.0025 K      | DFMPSDTEDFS.G  | Oxidation (M) 0.002000000000.0             |       |
| 5.8E-09 K     | VLDSSGLSPELD   |                                            |       |
| 0.0000056 K   | LFESYAEILASC.Y | Oxidation (M) 0.00000000000000000020.0     |       |
| 0.00000028 K  | GTSSILSEVFLH.T |                                            |       |
| 0.0025 K      | IGLFGGAGVGIT   |                                            |       |
| 0.0026 K      | VVDLLAPYQR.G   |                                            |       |
| 0.00017 R     | TIAMDGTEGL'.G  | Oxidation (M) 0.000200000000.0             |       |
| 0.00026 K     | VLNTGAPITVFA   |                                            |       |
| 1.3E-09 R     | VGLTGLTVAE\'.D |                                            |       |
| 0.00000011 K  | TVLIMELINNV.A  |                                            |       |
| 4.1E-11 R     | FTQANSEVSAI.I  |                                            |       |
| 0.00000014 R  | DAEQQDVLLFI.F  |                                            |       |
| 0.00013 K     | NLQDIIAILGMA   | Oxidation (M) 0.000000000020000000000000.0 | emPAI |
| 0.0082 R      | VQQLDVR.C      |                                            |       |
| 0.00049 R     | QAIVDGLR.D     |                                            |       |
| 0.0000005 K   | YLSGLGIAR.Q    |                                            |       |
| 0.0002 R      | DGLLQGSSAN.-   |                                            |       |

|            |   |               |   |                                                 |       |
|------------|---|---------------|---|-------------------------------------------------|-------|
| 0.000013   | K | LLDDVFEQK     | N |                                                 |       |
| 0.00076    | K | SSAVFIPHGPG   | D |                                                 |       |
| 7.7E-10    | R | GQIQAYVFDV    | A |                                                 |       |
| 0.0000013  | R | DSVLGFAVNV    | D |                                                 |       |
| 0.00000039 | K | DVMDMVLVT     | E | 2 Oxidation (N 0.0020000000000020.0             |       |
| 0.000013   | K | AMSAYGYEIV    | R | Oxidation (M) 0.020000000000000000000.0         | emPAI |
| 0.0037     | R | LAFGLAK       | S |                                                 |       |
| 0.0038     | R | ASIIGPLVK     | E |                                                 |       |
| 0.00062    | R | SSFGGFGSND    | R |                                                 |       |
| 0.00000054 | R | GSASMFEGVCS   |   | Oxidation (M) 0.000020000000.0                  |       |
| 0.00063    | K | TLAFGIPIIDK   | I |                                                 |       |
| 0.000031   | K | CEALHGDISQ    | E |                                                 |       |
| 0.00055    | K | KGSAILIHGQDA  |   | Methyl (DE) 0.00000000001000.0                  |       |
| 0.00000002 | R | DGNFSILVATCG  |   |                                                 |       |
| 0.000041   | R | QSMMSFATMS    |   | 3 Oxidation (N 0.00220000200000.0               |       |
| 7.8E-09    | R | SSGFGSFGSGCS  |   |                                                 |       |
| 0.0002     | K | YLNPLTIDLVL   |   |                                                 |       |
| 0.00000095 | R | ESAPSLDTICLYE |   | Oxidation (M) 0.0000000000000000000020.0        | emPAI |
| 0.00000012 | K | LLIEYLTADK    | T |                                                 |       |
| 0.0000039  | K | TELQVLVNEG    | I |                                                 |       |
| 1.1E-13    | K | TSAADVLQLLTM  |   |                                                 |       |
| 0.00000005 | R | LIDVCVENAEFF  |   |                                                 |       |
| 8.6E-11    | K | QELLAELYTEIG  |   |                                                 |       |
| 0.00017    | K | MAFDQFGSML    |   | 2 Oxidation (N 0.2000000020000000000000.0       | emPAI |
| 0.00047    | R | LLQAFLQK      | A |                                                 |       |
| 0.00043    | K | QFLVASVSR     | L |                                                 |       |
| 0.00013    | K | GVWSALFTR     | V |                                                 |       |
| 0.000013   | R | LSQVLGIFEK    | L |                                                 |       |
| 1.6E-09    | R | IQSQLSEALTV   | H |                                                 |       |
| 1.9E-09    | R | ALSDAADQANL   |   |                                                 |       |
| 0.00000067 | K | YCLDNFAAPLTT  |   |                                                 |       |
| 5.9E-09    | R | ETLVFLSQCFILR |   |                                                 | emPAI |
| 0.0043     | R | VDMLMVER      | T | 2 Oxidation (N 0.00202000.0                     |       |
| 0.00019    | R | ICGTIAADEK    | R |                                                 |       |
| 0.00000024 | R | AQEFVCGLAQI   |   |                                                 |       |
| 3.5E-11    | K | LLEIDPNGAVSK  |   | 2 Oxidation (N 0.0000000000000000220.0          |       |
| 4.1E-13    | R | LEVYTADDYAIW  |   |                                                 |       |
| 0.0000019  | R | TVQHILIGSGMA  |   | Oxidation (M) 0.00000000020000000000000000000.0 | emPAI |
| 0.00008    | K | VLDFELVR      | D |                                                 |       |
| 0.0014     | R | GINDTYFGR     | L |                                                 |       |
| 0.000058   | R | FMVQNVVDLIA   |   | Oxidation (M) 0.0200000000.0                    |       |
| 0.0000088  | K | SLLSEYFSIR    | L |                                                 |       |
| 0.00044    | K | KINEIHSEAER   | N |                                                 |       |
| 0.0000023  | K | STWQGSPTFA    |   |                                                 |       |
| 0.00000011 | R | AAVSGAADGMP   |   | Oxidation (M) 0.000000000200000000.0            |       |
| 0.00000065 | R | VLLNNCQEAFL   |   |                                                 |       |
| 7.5E-10    | K | APNSFGFLGEV   |   |                                                 |       |
| 0.0021     | K | IVHHIVQELLAG  | A |                                                 | emPAI |
| 0.000079   | K | DVIVAAETGSC   | T |                                                 |       |
| 0.0011     | K | MGQPVETAFSK   |   | Oxidation (M) 0.20000000000.0                   |       |
| 0.0000045  | R | MVNGLVDEDDV   |   | Oxidation (M) 0.200000000000000.0               |       |
| 4.8E-09    | R | AGQYGTVTSL'D  |   |                                                 |       |
| 2.1E-10    | R | TMVFANTVEAFA  |   | Oxidation (M) 0.02000000000000000000.0          |       |
| 0.0000039  | R | GVDVPPNVSHVI  |   |                                                 | emPAI |
| 3.4E-09    | R | SSIFDANAGIGS  |   |                                                 |       |
| 0.00023    | R | GASQNIIPSSTRA |   |                                                 |       |
| 4.4E-10    | R | VPTSNVSVVDL   |   |                                                 |       |
| 0.00045    | R | VLDLIEHMAL    | - |                                                 |       |

|               |                |                                              |       |
|---------------|----------------|----------------------------------------------|-------|
| 9.3E-13 K     | GILGYTDEDVLS   |                                              |       |
| 0.0000031 K   | RDPSEIPWAD A   |                                              | emPAI |
| 0.0053 R      | SLNLTLR K      |                                              |       |
| 0.0000028 R   | VAEYAFLYAK T   |                                              |       |
| 0.000079 R    | YDDVDLITIR E   |                                              |       |
| 0.0000035 K   | TRYDDVDLITIE   |                                              |       |
| 2.4E-11 R     | TADLGGSSTTTA   | Methyl (DE) 0.000000000001000.0              |       |
| 0.0000074 K   | ATLFPGDGIGFQ   |                                              |       |
| 0.0036 K      | QAEQIHSAIN'Y   |                                              |       |
| 0.0015 K      | ELNLYANVRPCT   |                                              | emPAI |
| 0.0000015 R   | DAVLLVFANK Q   |                                              |       |
| 0.000011 R    | ILMVGLDAAG T   | Oxidation (M) 0.00200000000.0                |       |
| 7.3E-10 K     | NISFTVWDVG I   |                                              |       |
| 0.0000005 K   | QDLPNAMNA L    | Oxidation (M) 0.000000200000000.0            |       |
| 0.000032 R    | MLNEDELDAQ     | Oxidation (M) 0.200000000000000000.0         |       |
| 0.0000065 R   | HYFQNTQGLIF D  |                                              |       |
| 0.0000076 K   | LGEIVTTIPTIG N |                                              | emPAI |
| 0.004 R       | VGIKPPK G      |                                              |       |
| 0.0027 K      | VVSSAIDK Y     |                                              |       |
| 0.0024 K      | GVLLYGPPGTCT   |                                              |       |
| 0.000026 K    | HGEIDYEAIVK L  |                                              |       |
| 0.00027 R     | AIASNIDANFLIV  |                                              |       |
| 0.0039 R      | DYVIHEDFMK A   | Oxidation (M) 0.0000000020.0                 |       |
| 0.0000016 R   | VVLDMTTLTIMA   |                                              |       |
| 0.0000036 R   | NICTEAGMFA A   | Oxidation (M) 0.000000020000.0               |       |
| 0.00000013 R  | TLMELLNQLD'V   | Oxidation (M) 0.002000000000000000.0         |       |
| 0.0000023 K   | SLQSVGQIIGE' L |                                              | emPAI |
| 0.000011 K    | FSLGLAEPK L    |                                              |       |
| 0.00018 K     | IVNDNYLYAR V   |                                              |       |
| 0.0086 K      | YGLIFHSSFIGR A |                                              |       |
| 0.00000058 K  | CPSSTLQILGAI A |                                              |       |
| 0.0000007 R   | IDCFADGATT'L   |                                              |       |
| 3.4E-09 K     | IPCQSNEFVLE G  |                                              |       |
| 0.000000027 K | MSDIAPNLAA L   |                                              |       |
| 0.0011 R      | VDNMVQAIFIV    | 2 Oxidation (M) 0.000200000000000000000000.0 | emPAI |
| 0.0068 K      | RGILTLK Y      |                                              |       |
| 0.00000021 K  | AGFAGDDAPR A   |                                              |       |
| 0.0018 R      | DLTDYLMK I     | Oxidation (M) 0.00000020.0                   |       |
| 0.009 K       | EITALAPSSMK I  | Oxidation (M) 0.0000000020.0                 |       |
| 0.0003 K      | IWHHTFYNELIV   |                                              |       |
| 0.0000014 K   | YPIEHGIVSNW I  | Oxidation (M) 0.00000000000000200.0          |       |
| 0.0000001 R   | VAPEEHPVLLT A  |                                              |       |
| 9.7E-10 K     | DLYGNIVLSGC M  | Oxidation (M) 0.0000000000000020000000.0     |       |
| 0.0000001 R   | TTGIVLDSGDC L  |                                              | emPAI |
| 0.0011 K      | LLVLLQNGK Q    |                                              |       |
| 0.000062 R    | SSAESLFNLAK Q  |                                              |       |
| 0.00003 K     | ILIVFAEVLTK D  |                                              |       |
| 0.000082 K    | EGFFPWIDQV F   |                                              |       |
| 9.7E-09 K     | IAALNAVISFVCD  |                                              |       |
| 0.0055 K      | NLDQVSMVIV     | Oxidation (M) 0.0000000200000000000.0        |       |
| 0.0023 K      | ASFLPFFDELS'D  | Oxidation (M) 0.00000000000000002000.0       |       |
| 0.0000011 R   | QLVDIVGSM'L H  |                                              |       |
| 0.000055 K    | QMVQEGALTY     | Oxidation (M) 0.020000000000000000000000.0   |       |
| 0.0043 R      | WAINAIGQL'V    |                                              |       |
| 0.000082 K    | LQESAFILAQIE   |                                              | emPAI |
| 0.00013 K     | VIEVEGPR G     |                                              |       |
| 0.000066 K    | FLDGIYVSEK S   |                                              |       |
| 0.00069 K     | HLNLDFQLIK D   |                                              |       |

|             |   |                 |                                              |       |
|-------------|---|-----------------|----------------------------------------------|-------|
| 0.00000064  | R | KVEMLDGVTI' S   | Oxidation (M) 0.000200000000.0               |       |
| 0.00000042  | R | TALSHVDNLIS G   |                                              |       |
| 0.0034      | R | FVYAHFPINAS S   |                                              |       |
| 2.2E-10     | K | TILSETMDIPI V   | Oxidation (M) 0.0000000200000000.0           |       |
| 0.006       | K | HLNLDQFIKD K    |                                              |       |
| 0.0000051   | K | VKDEIVLDGNI S   |                                              | emPAI |
| 0.0000059   | K | IADVLLLMEK E    | Oxidation (M) 0.0000000200.0                 |       |
| 0.0000002   | R | ASSSTYSVLLR V   |                                              |       |
| 0.00000012  | K | DLLSIYASLGR E   |                                              |       |
| 0.00000031  | R | IEATTWDALIK L   |                                              |       |
| 0.000000028 | R | TLLANCVAAGI K   |                                              |       |
| 0.00012     | K | TIVSAPGLSIG S W |                                              |       |
| 0.00034     | K | GATNDISGME H    |                                              | emPAI |
| 0.0054      | K | VQQITIR S       |                                              |       |
| 0.0002      | K | GELLVGTAK R     |                                              |       |
| 0.000078    | K | EIEDAVADLR S    |                                              |       |
| 0.00000083  | K | VQSIVAEIFGK S   |                                              |       |
| 0.0000042   | R | SSGGLSEDDIQ M   |                                              |       |
| 0.000023    | K | MKETAEAYLG S    | Oxidation (M) 0.20000000000.0                |       |
| 0.000045    | R | QAVTNPTNTV R    |                                              |       |
| 0.0000021   | K | EVDEVLLVGGIV    | Oxidation (M) 0.0000000000200.0              |       |
| 0.000089    | R | SRFETLVNHLIIT   |                                              |       |
| 0.00000027  | K | ELLLLDVTPSL L   |                                              |       |
| 0.0046      | K | GMQVLEFVG† E    | Oxidation (M) 0.0200000000.0                 |       |
| 0.002       | R | LESLHSEGVHF L   |                                              |       |
| 0.0000067   | R | EAGSGAPSLE A    |                                              |       |
| 0.000000018 | R | LEGASEESLLS V   |                                              |       |
| 0.000000015 | K | STGGWGWGF A     |                                              |       |
| 6.5E-12     | K | VFDDSVESFTS G   |                                              |       |
| 0.00023     | K | AADMATGFT† T    | 2 Oxidation (M) 0.000200000000000000002000.0 | emPAI |
| 0.0068      | K | RGILTLK Y       |                                              |       |
| 0.00000021  | K | AGFAGDDAPR A    |                                              |       |
| 0.0002      | R | GYSFTTAEER E    |                                              |       |
| 0.009       | K | EITALAPSSMK I   | Oxidation (M) 0.00000000020.0                |       |
| 0.0003      | K | IWHHTFYNELIV    |                                              |       |
| 1.3E-09     | K | NYELPDGQVI† F   |                                              |       |
| 0.0079      | R | VAPEEHPILLTIA   |                                              |       |
| 0.0077      | K | YPIEHGIVNNV I   | Oxidation (M) 0.0000000000000200.0           |       |
| 9.7E-10     | K | DLYGNIVLSGC M   | Oxidation (M) 0.00000000000002000000.0       |       |
| 0.0000001   | R | TTGIVLDSGDC L   |                                              | emPAI |
| 0.0043      | K | YVLEGHDR G      |                                              |       |
| 0.0068      | R | GTGGSAVFIAF N   |                                              |       |
| 0.0014      | R | GWSESSPNV G     |                                              |       |
| 0.0071      | K | GIFEGGLESANG    |                                              |       |
| 0.0000039   | R | AITINATEYIFK L  |                                              |       |
| 3E-10       | R | LSFLYLITGNLC L  |                                              |       |
| 0.00000012  | R | GPPALVDFDFSC L  |                                              |       |
| 6.9E-10     | R | VFLSILQTIPLV R  |                                              | emPAI |
| 0.0026      | K | LPDIEVVR V      |                                              |       |
| 0.001       | K | SISSDLNFTR Y    |                                              |       |
| 0.00000011  | K | LAIFTALAFSQ† L  |                                              |       |
| 0.0048      | R | EAILPSVVYIQ† I  |                                              |       |
| 0.0000088   | K | GIVLSFVTDFFI E  |                                              |       |
| 0.00000045  | R | FLQSLELFEENIK   |                                              |       |
| 0.00014     | K | VTEESNVDEVIQ    |                                              |       |
| 0.000000018 | K | EYLVENSLEDL R   |                                              |       |
| 0.000000038 | K | SLEPFVNWLEI -   |                                              | emPAI |
| 0.00011     | K | DGFFILK E       |                                              |       |

|             |   |                 |                                                    |       |
|-------------|---|-----------------|----------------------------------------------------|-------|
| 0.00062     | R | LADTYGSGELF L   |                                                    |       |
| 0.00059     | K | TEALLQEPFLK N   |                                                    |       |
| 0.00018     | K | LFMENGIEEL A K  | Oxidation (M) 0.002000000000.0                     |       |
| 0.000022    | R | FGFNLLVGGFF R   |                                                    |       |
| 0.00000013  | R | VTELVPLVAEII E  |                                                    |       |
| 0.00094     | K | QEGLSFVGLH L    |                                                    |       |
| 1.2E-10     | K | GLASVGLTSLC N   | Oxidation (M) 0.00000000000020000.0                | emPAI |
| 0.0033      | R | FVEFLTR E       |                                                    |       |
| 0.00018     | K | IQSVIEAGVVP L   |                                                    |       |
| 0.00063     | R | NATWTLSNFC G    |                                                    |       |
| 0.0057      | R | SPPIEEVIDAG F   |                                                    |       |
| 3.5E-10     | R | IITVCLEGLENI V  |                                                    |       |
| 1.3E-12     | R | EQAVWALGN C     |                                                    |       |
| 0.0019      | R | DLVLGQGALIF L   |                                                    |       |
| 0.0000011   | K | VVIEHGAVPIF E   |                                                    | emPAI |
| 0.00001     | K | LADLVGVTLGI G   |                                                    |       |
| 0.0000059   | R | DLVGVLEDAIF G   |                                                    |       |
| 0.00000067  | K | VVAAGANPVL G    |                                                    |       |
| 0.0000029   | K | YEDLMAAGIIE V   | Oxidation (M) 0.00002000000000.0                   |       |
| 2E-12       | R | GGYPILIIAEDII L |                                                    | emPAI |
| 0.0083      | K | APGILER K       |                                                    |       |
| 0.00024     | K | AVDSLVPIGR G    |                                                    |       |
| 0.0012      | R | TGSIVDVPAGI A   |                                                    |       |
| 0.00059     | R | VVDAMGVPIE G    | Oxidation (M) 0.000020000000.0                     |       |
| 0.0029      | K | SVHEPMQTGL A    | Oxidation (M) 0.00000200000.0                      |       |
| 0.000015    | R | AAELTNLFESR I   |                                                    |       |
| 0.0000014   | K | TTIAIDTILNQK Q  |                                                    |       |
| 4.3E-14     | R | EVAAFQFGSI G    |                                                    |       |
| 0.00052     | K | VVDSLYVR S      |                                                    |       |
| 0.00028     | K | LRPFFSLIPK A    |                                                    |       |
| 0.0028      | K | AQLEDDPIVHI H   |                                                    |       |
| 0.0000088   | K | AGLQYVGPDL A    | Oxidation (M) 0.00000000000020.0                   |       |
| 7.4E-10     | K | EYVEALALLSTI E  |                                                    |       |
| 0.0077      | R | HLSSLYDTLLE L   |                                                    |       |
| 0.000000086 | R | VEIAHIAELIGL K  |                                                    |       |
| 5.2E-10     | K | TGYSYFFFAFE A   |                                                    | emPAI |
| 0.00043     | K | VLELALK K       |                                                    |       |
| 0.0024      | K | AGIIDPLK V      |                                                    |       |
| 0.0053      | R | GVEDLADAVK V    |                                                    |       |
| 0.0000098   | K | IGVQIIQNALK T   |                                                    |       |
| 0.000000062 | K | SVAAGMNAM R     | 2 Oxidation (M) 0.000002002000.0                   |       |
| 0.0000059   | K | LAVDTVVTNL A    |                                                    |       |
| 0.0000041   | K | TLFNELEVVEG I   | Oxidation (M) 0.0000000000020.0                    |       |
| 0.000000058 | K | LLEQDNPDLG G    |                                                    |       |
| 0.00000065  | R | TALVDAASVS E    |                                                    | emPAI |
| 0.00061     | K | ALEAVLPK P      |                                                    |       |
| 0.00015     | K | FYEILGVPK S     |                                                    |       |
| 0.0000025   | K | VSLEDVYLGTN K   | Oxidation (M) 0.000000000020.0                     |       |
| 0.0033      | K | SNPGEVVKPD A    |                                                    |       |
| 0.0000051   | R | EIYDQYGEDAI E   |                                                    |       |
| 0.0032      | R | QLGPGMIQQI G    | 2 Oxidation (M) 0.00000200020000000.0              |       |
| 0.00000027  | K | ITFEGQADEAF E   |                                                    |       |
| 3.5E-09     | K | EGMGGGGGGC Q    | Oxidation (M) 0.00200000000000000000000000000000.0 |       |
| 0.0000047   | R | KGEDLFVEHTI S   |                                                    | emPAI |
| 0.006       | R | SGAYIVR Q       |                                                    |       |
| 0.0048      | K | SIVASGLAR R     |                                                    |       |
| 0.0061      | K | TAAYGHFGR D     |                                                    |       |
| 0.0000033   | K | ANVDYEQIVR K    |                                                    |       |

|             |   |               |   |                                                |       |
|-------------|---|---------------|---|------------------------------------------------|-------|
| 0.0022      | K | IPDKEILEIVK   | E |                                                |       |
| 0.000000059 | R | FVIGGPHGDA    | K |                                                |       |
| 0.0011      | K | TNMVMVFGE     | A | 2 Oxidation (M) 0.002020000000.0               |       |
| 0.000047    | R | DDADFTWEV     | S |                                                |       |
| 0.000000041 | R | EIGFVSADVGL   | V |                                                |       |
| 0.0041      | K | VLVNIEQQSP    | K |                                                |       |
| 0.0000051   | R | VHTVLISTQHC   | E |                                                | emPAI |
| 0.0024      | K | GVLLYGPPGT    | T |                                                |       |
| 0.00001     | K | AVCTEAGMFA    | E | Oxidation (M) 0.000000020000.0                 |       |
| 0.0038      | R | IDILDQALLRP   | I |                                                |       |
| 0.0043      | R | RVHVTQEDFE    | V | Oxidation (M) 0.00000000020000.0               |       |
| 0.00000066  | K | VPDSTYDMIG    | E | Oxidation (M) 0.0000000200000000.0             |       |
| 1.4E-10     | R | TMLELLNQLD    | I | Oxidation (M) 0.0200000000000000.0             |       |
| 0.000082    | R | MLREELQLLQ    | V | Oxidation (M) 0.2000000000000000000.0          | emPAI |
| 0.0002      | R | SIVALIASR     | G |                                                |       |
| 0.0000048   | K | AVVTFDDAILD   | T |                                                |       |
| 2.1E-10     | K | MGYGSAAVEL    | Y | Oxidation (M) 0.2000000000000.0                |       |
| 0.00000015  | K | LSQVELLVIDE   | S |                                                |       |
| 9E-13       | K | SLLGPYLVFLSS  | S |                                                | emPAI |
| 0.00059     | K | WAEIIGQAR     | H |                                                |       |
| 0.0000029   | K | LLSEEVDFSR    | G |                                                |       |
| 7.6E-10     | K | FFALQVLEGI    | Y |                                                |       |
| 1.4E-09     | R | NIAETGLNLLLI  | N |                                                |       |
| 0.000021    | R | DLSQPIDVGI    | E |                                                |       |
| 0.0000039   | K | LRDLSQPIDVG   | E |                                                | emPAI |
| 0.00026     | K | YFVEAGIAVFR   | R |                                                |       |
| 0.000000015 | R | EVGDGTTSVV    | R |                                                |       |
| 1.7E-09     | R | EQLAIAEFADA   | V |                                                |       |
| 8.9E-11     | K | LISGDSDFFAN   | M |                                                |       |
| 0.00043     | R | TLESNTVVAG    | E |                                                | emPAI |
| 0.0068      | K | RGILTK        | Y |                                                |       |
| 0.00000021  | K | AGFAGDDAPRA   | A |                                                |       |
| 0.0018      | R | DLTDYLMK      | I | Oxidation (M) 0.00000020.0                     |       |
| 0.009       | K | EITALAPSSMK   | I | Oxidation (M) 0.0000000020.0                   |       |
| 0.00002     | R | GYMFTTAER     | E | Oxidation (M) 0.0020000000.0                   |       |
| 0.0003      | K | IWHHTFYNELI   | I |                                                |       |
| 1.9E-10     | K | NYELPDGQVI    | F |                                                |       |
| 0.0035      | K | YPIEHGVVSNV   | I | Oxidation (M) 0.000000000000200.0              |       |
| 0.0000014   | R | EATTGFLTNLP   | I |                                                |       |
| 2.5E-10     | R | VQIASLIGLLIR  | H |                                                |       |
| 0.000000088 | R | SFVNLIESLLIK  | D |                                                |       |
| 0.00056     | R | SFVNLIESLLIKI | I |                                                |       |
| 0.00024     | K | NLFPSLLSIIEQ  | G |                                                |       |
| 0.000000034 | R | SASGWQVSNV    | K |                                                |       |
| 0.0075      | K | LPEESYGLAYI   | G |                                                | emPAI |
| 0.00000014  | K | SVAAGSATVA    | S |                                                |       |
| 0.00000059  | K | SGAAPVVSAA    | V |                                                |       |
| 0.00011     | R | FGSWPDGLDS    | I |                                                |       |
| 3.8E-10     | K | QFSGVDILSGE   | V |                                                |       |
| 0.000000002 | K | ADGLVDMPYI    | F | Oxidation (M) 0.0000002000000000000000.0       | emPAI |
| 0.00098     | K | SEVLDFIR      | S |                                                |       |
| 0.0081      | K | NALYQATIK     | Q |                                                |       |
| 0.0023      | K | VVDAPEILTVL   | I |                                                |       |
| 7.6E-12     | K | IADAEENLGES   | E |                                                |       |
| 0.000000025 | K | AFGVSVDIFDC   | F |                                                |       |
| 0.0000042   | R | SHGMAPLYET    | A | 2 Oxidation (M) 0.00020000000000000000000020.0 | emPAI |
| 0.0051      | R | SISCWTLSR     | F |                                                |       |
| 0.0031      | K | YLIQESGNPK    | G |                                                |       |

|             |   |                |                                        |       |
|-------------|---|----------------|----------------------------------------|-------|
| 0.01        | K | SELLPCLGAAD N  |                                        |       |
| 0.0000014   | R | IVYDAIGTLAD E  |                                        |       |
| 0.0012      | R | LLQFFQSPHAS K  |                                        |       |
| 8E-11       | R | LLDFLEIASQQ E  |                                        |       |
| 0.00019     | R | LHGSEDFDDD K   |                                        |       |
| 0.0073      | K | CSAAAIDVLSN N  |                                        |       |
| 0.000087    | K | ICEDIPHVLDTI L |                                        | emPAI |
| 0.0004      | K | VTVMDTLSR L    | Oxidation (M) 0.000200000.0            |       |
| 0.00000021  | R | VGQAVDVVVG P   |                                        |       |
| 0.000013    | K | QESVEATAEV T   |                                        |       |
| 2.4E-09     | R | FLPLGLGLLYL Q  |                                        |       |
| 0.00000018  | R | AVPLALGLLCI V  |                                        |       |
| 0.000036    | K | YIPLSPILEGFV E |                                        |       |
| 0.006       | K | IGIGQPK R      |                                        |       |
| 0.000027    | R | VDEIITCAPR R   |                                        |       |
| 0.00069     | R | GASHHVLDEA S   |                                        |       |
| 0.000024    | K | DSFLDEGFILDI K |                                        |       |
| 0.00054     | K | DSFLDEGFILDI I |                                        |       |
| 0.000017    | R | SLHDALCVLSC V  |                                        |       |
| 0.0000001   | K | VQDDEVGDG E    |                                        |       |
| 0.000002    | R | ALVAIPTTIADI A |                                        |       |
| 0.0037      | R | QLIYNFPEELF L  |                                        | emPAI |
| 3.6E-09     | K | ALDALIAFLR A   |                                        |       |
| 0.000000099 | K | EIIEVLDVLLR W  |                                        |       |
| 0.0000001   | K | AGCLNLVDVIE T  |                                        |       |
| 0.000000036 | K | VDIFSQLQNA T   |                                        | emPAI |
| 0.002       | K | NVQVQQQVIE F   |                                        | emPAI |
| 0.00043     | K | VLELALK R      |                                        |       |
| 0.0024      | K | AGIIDPLK V     |                                        |       |
| 0.0053      | K | GVEDLADAVK V   |                                        |       |
| 0.0000098   | K | IGVQIIQNALK T  |                                        |       |
| 0.000000062 | K | SVAAGMNAM R    | 2 Oxidation (M) 0.000002002000.0       |       |
| 0.000067    | R | GYTSPYFITNQ T  |                                        |       |
| 0.0000041   | K | TLFNELEVVEG L  | Oxidation (M) 0.0000000000020.0        |       |
| 0.000000058 | K | LLEQDNPDLG G   |                                        | emPAI |
| 0.000046    | R | HENVDIVVIR E   |                                        |       |
| 0.00021     | R | HLQFPSFADR L   |                                        |       |
| 0.0000014   | K | YAFEYAYLNNF K  |                                        |       |
| 0.000000001 | K | TPVGGGVSSLI K  |                                        |       |
| 0.00000037  | K | ELDLFASLVNC H  |                                        | emPAI |
| 0.00032     | K | LAIVNVGR Q     |                                        |       |
| 0.000008    | R | AVAVVVDPIQ G   |                                        |       |
| 0.00000012  | R | SINPQTIMLGC Q  | Oxidation (M) 0.00000002000000.0       |       |
| 0.000000045 | K | TNEQTVQEMI Y   | Oxidation (M) 0.000000002000000.0      |       |
| 0.000000036 | R | IFGAGGGGLGH M  |                                        | emPAI |
| 0.00056     | R | DLNEYVGFVK S   |                                        |       |
| 0.000045    | K | GVDGLFESFAL L  |                                        |       |
| 0.0013      | K | IGDHLQSADA E   |                                        |       |
| 3.4E-09     | R | VLESFTALEG Q   |                                        |       |
| 5.6E-10     | R | AESQQVSESS S   |                                        |       |
| 0.0031      | R | GQSAPLSSAPF D  |                                        | emPAI |
| 0.0049      | K | NSIGIRPGK G    |                                        |       |
| 0.000093    | R | MSLLAEAGR V    | Oxidation (M) 0.200000000.0            |       |
| 0.0021      | K | AGHQTSAESW A   |                                        |       |
| 0.00000055  | K | KAGHQTSAES A   |                                        |       |
| 0.000077    | K | LESIYGSFEKPS K |                                        |       |
| 6.6E-09     | K | TMISDSDYTEF W  | Oxidation (M) 0.0200000000000000.0     |       |
| 0.00015     | K | IENVPEMPLV T   | Oxidation (M) 0.00000020000000000000.0 | emPAI |

|             |   |               |   |                                          |       |
|-------------|---|---------------|---|------------------------------------------|-------|
| 0.000083    | R | VVGSEFVQK     | Y |                                          |       |
| 0.0024      | R | GVLLYGPPGT    | C |                                          |       |
| 0.0041      | K | AVANHTTAAF    | V |                                          |       |
| 0.0028      | K | KPDTDFEFYK    | - |                                          |       |
| 0.000078    | R | ELLKPSASVALI  | H |                                          |       |
| 3.9E-09     | K | ENAPAIIFIDEV  | F |                                          |       |
| 2.6E-09     | K | ASPALMDLST    | L | Oxidation (M) 0.000002000000000000.0     | emPAI |
| 0.0003      | K | ADLVNNLGTI    | S |                                          |       |
| 0.00041     | R | ELISNSSDALDI  | I |                                          |       |
| 0.0017      | K | HFSVEGQLEF    | A |                                          |       |
| 0.00000027  | K | GIVDSEDLPLN   | E |                                          |       |
| 0.0056      | K | SGDELTSKDY    | M |                                          |       |
| 1.2E-10     | K | GIEVLYMVDA    | E |                                          |       |
| 0.0034      | K | GLAPLWGR      | Q |                                          |       |
| 0.000025    | K | IGMVGLFTR     | G |                                          |       |
| 0.0033      | K | FGFYEFYK      | K |                                          |       |
| 0.00000017  | K | FASFETIVEMIN  | Y |                                          |       |
| 0.00000048  | K | VFVGLPTTGG    | A |                                          | emPAI |
| 0.00011     | K | VGSSEAALLAK   | L |                                          |       |
| 0.000046    | K | GTVEIITPVELI  | Q |                                          |       |
| 2.1E-14     | R | IHSENSGNTAI   | G | Methyl (DE) 0.000100000000000000000000.0 |       |
| 0.00000039  | R | ALLDVGLIR     | T |                                          |       |
| 6.1E-14     | K | DIVAQIVSASIA  | A |                                          | emPAI |
| 0.0000068   | K | DAGVIAGLNV    | I |                                          |       |
| 0.000023    | K | MKETAEAYLG    | K | Oxidation (M) 0.2000000000.0             |       |
| 0.00018     | R | NALETYYVNMN   | N | Oxidation (M) 0.00000000020.0            |       |
| 0.000055    | R | ITPSWVGFTD    | L |                                          |       |
| 1.4E-10     | R | VEIESLFDGVD   | A |                                          | emPAI |
| 0.00000043  | R | GLCAIAQAESL   | Y |                                          |       |
| 0.00000024  | R | ELAEDGYSGVIV  | V |                                          |       |
| 4.2E-12     | K | FVADGVFYAEI   | E |                                          | emPAI |
| 0.0049      | K | NSIGIRPGK     | G |                                          |       |
| 0.0021      | K | AGHQTSAESWA   | A |                                          |       |
| 0.00000055  | K | KAGHQTSAES    | A |                                          |       |
| 0.000077    | K | LESIYGSFEKPS  | K |                                          |       |
| 2.1E-09     | R | IINSDEVQSVV   | D |                                          |       |
| 0.00015     | K | IENVPEMPLV    | T | Oxidation (M) 0.000000200000000000.0     | emPAI |
| 5.9E-09     | R | AGVDDLLGILKN  | N |                                          |       |
| 4.2E-09     | K | VVGLVGELFSL   | V |                                          |       |
| 6.6E-09     | R | VISEEFDSIFLEI | R |                                          | emPAI |
| 0.000000019 | K | IADVLLLLEK    | E |                                          |       |
| 0.00031     | R | VSSNVYSVLLR   | V |                                          |       |
| 0.000007    | K | DLLSVYGYLQF   | E |                                          |       |
| 1.8E-10     | R | YNEVLAAILAFI  | I |                                          | emPAI |
| 0.0004      | R | ADGYILEGK     | E |                                          |       |
| 0.000024    | K | SAIVQVDAAPI   | Q |                                          |       |
| 0.0000049   | R | SLDSHIEDQFAL  | L |                                          |       |
| 0.000094    | R | LDTGNYSWG     | S |                                          |       |
| 0.000000002 | R | VLDVVYNASN    | T |                                          | emPAI |
| 0.00079     | R | TDACFIR       | V |                                          |       |
| 0.00023     | R | PLDEDDIALLK   | T |                                          |       |
| 0.00044     | K | TYGLGPYSAPI   | K |                                          |       |
| 0.000000098 | R | FDDGVGGDNIT   | T |                                          |       |
| 8.2E-11     | R | TMLEIVNQLDI   | G | Oxidation (M) 0.02000000000000.0         | emPAI |
| 0.00031     | R | NIDQVLLFEK    | E |                                          |       |
| 0.000039    | K | LVYLYLINYAK   | S |                                          |       |
| 1.7E-10     | K | SQPDLAILAVN   | D |                                          |       |
| 0.00022     | K | MAPPLVTLLS    | N | Oxidation (M) 0.200000000000000000.0     |       |

|             |   |                |                                        |       |
|-------------|---|----------------|----------------------------------------|-------|
| 0.00005     | K | LLTALNECTEM Y  |                                        | emPAI |
| 0.0035      | R | SFSMEFLETK D   | Oxidation (M) 0.0002000000.0           |       |
| 0.000000025 | K | AEMTLDETLE/Q   | Oxidation (M) 0.0020000000000000000.0  |       |
| 9.2E-10     | R | SAADLVIESLE(L  |                                        |       |
| 0.00001     | K | LADLVGVTLGFG   |                                        |       |
| 0.00000019  | R | DIISILEDAIK G  |                                        |       |
| 0.000000067 | K | VVAAGANPVL G   |                                        |       |
| 0.0000029   | K | YEDLMAAGIIE V  | Oxidation (M) 0.00002000000000.0       |       |
| 0.009       | K | GGYPLIIAEDI L  |                                        | emPAI |
| 0.00012     | K | FVFNLLPAIC/A   |                                        |       |
| 1.1E-13     | R | LLVDEAVLQEQ\ G |                                        |       |
| 1.8E-09     | K | IPSFEAVDDFL' V |                                        |       |
| 1.2E-10     | K | VIELSDVILEVL D |                                        | emPAI |
| 0.00031     | R | NIDQVLEFK E    |                                        |       |
| 0.000039    | K | LVYLYLINYAK S  |                                        |       |
| 1.7E-10     | K | SQPDLAILAVN D  |                                        |       |
| 0.000059    | R | GIPFLIELTAIV(C |                                        |       |
| 0.00022     | K | MAPPLVTLLS/N   | Oxidation (M) 0.20000000000000000000.0 | emPAI |
| 0.00015     | R | VDSVFALR S     |                                        |       |
| 0.000082    | K | FIQFVVDIFK R   |                                        |       |
| 6.3E-12     | R | VINLILQYLSNS S |                                        |       |
| 0.00074     | K | DLDEIRPVLPQ L  |                                        |       |
| 0.00054     | K | VCILGLTSLFSL A |                                        | emPAI |
| 0.0000018   | K | SQDSEVGDGT E   |                                        |       |
| 0.00000036  | K | INAINAATEEA N  |                                        |       |
| 0.00043     | R | VAAAAGGTVC Q   |                                        | emPAI |
| 0.0002      | K | LVAMATPEDM I   | 2 Oxidation (M) 0.00020000020.0        |       |
| 0.00000041  | K | NSFVETLEGW T   |                                        |       |
| 0.00000057  | R | DLFEGILQAGS T  |                                        |       |
| 0.000021    | K | IGSSLIAQAAD' I |                                        | emPAI |
| 0.0044      | K | GYEGVVTR W     |                                        |       |
| 0.00022     | R | VLAHTQIR K     |                                        |       |
| 0.000035    | R | HGSLGFLPR K    |                                        |       |
| 0.0013      | R | QSLTQTSR L     |                                        |       |
| 0.003       | K | DEMIDIIGVTK G  | Oxidation (M) 0.00200000000.0          |       |
| 0.0012      | K | VDFAYSFFEK Q   |                                        |       |
| 0.000083    | K | FIDTASIFGHGIF  |                                        |       |
| 0.0000029   | K | VGTEAHTAM1T    | Oxidation (M) 0.00000000200000.0       |       |
| 0.0078      | R | SLNTVWAQHI R   |                                        | emPAI |
| 0.0000046   | R | IGDLELFR T     |                                        |       |
| 0.0013      | R | LLLGEIPER S    |                                        |       |
| 0.000022    | K | EIAALIDTGSYTE  |                                        |       |
| 0.0012      | K | ALRPYFELTNA I  |                                        |       |
| 0.000067    | K | GDEHDMEVD' H   | Oxidation (M) 0.00000200000000000000.0 |       |
| 0.00000058  | K | LTGSLVSSFLDI L |                                        | emPAI |
| 0.0000005   | R | AILSSEIAVVDL G |                                        |       |
| 7.5E-11     | R | VAAFADTVNE V   |                                        |       |
| 0.0000041   | K | LLLIGDSGVGK S  |                                        |       |
| 0.00004     | K | LQIWDTAGQE F   |                                        |       |
| 0.0036      | K | AFADELGIPFLIN  |                                        |       |
| 4.5E-11     | R | FADDSYLDYSI' I |                                        | emPAI |
| 0.0000022   | R | FIADAVASLPK L  |                                        |       |
| 0.00016     | R | LLTLINDVYK Y   |                                        |       |
| 0.00024     | K | AFVSSNLSLGD Q  |                                        |       |
| 0.000000065 | K | YVDSVVGQI, F   |                                        |       |
| 0.0007      | K | LPPQVFDNLVIT   |                                        | emPAI |
| 0.000051    | K | IMFALTSIK G    |                                        |       |
| 0.0081      | K | IPDWFLNR Q     |                                        |       |

|               |                |                                      |       |
|---------------|----------------|--------------------------------------|-------|
| 3.7E-10 R     | AGELSAAEIDN Q  | Oxidation (M) 0.000000000002000000.0 |       |
| 0.0001 K      | HATFVPHTAG Y   |                                      |       |
| 0.0000035 R   | VNQAIFLLTTG E  |                                      |       |
| 1.4E-10 K     | TIAECLADELIM G |                                      | emPAI |
| 0.00062 K     | VGIALALKP -    |                                      |       |
| 0.000062 K    | SFFTVSGEVDS A  |                                      |       |
| 0.00000048 K  | GSLFLGDVATCN   |                                      |       |
| 0.00000016 K  | VSTDSSLLTTLV   |                                      | emPAI |
| 0.00000018 K  | VGEEVEILGLR E  |                                      |       |
| 9.4E-09 R     | GSALSALQGTIQ   |                                      |       |
| 0.000029 R    | HYAHVDCPGFN    |                                      |       |
| 0.0000024 R   | MQADNTLPLFR    | Oxidation (M) 0.20000000000.0        |       |
| 0.0042 K      | FYSGFPVYCVFI   |                                      |       |
| 0.00027 K     | YPYTGSLDCAMT   | Oxidation (M) 0.00000000020.0        |       |
| 0.000022 K    | AIESNDGKPLPA   |                                      |       |
| 0.00000033 R  | IQLGQGSAAASIN  | Oxidation (M) 0.000000000000200.0    | emPAI |
| 0.00000003 K  | ELLDSSILDTIVKI |                                      |       |
| 0.000000045 K | LILLASLSDSLEL  |                                      | emPAI |
| 0.00011 K     | LQQFQGAVDK     |                                      |       |
| 0.000012 R    | EGLVSDAIESFIA  |                                      |       |
| 0.000012 K    | QVGYTPDYLFIT   |                                      |       |
| 0.0000048 K   | FQSVPVQAGCG    |                                      | emPAI |
| 2.8E-09 R     | SIATLAITLLKT   |                                      |       |
| 0.000018 R    | SLMTFLSNILRE   |                                      |       |
| 0.00000025 R  | ELTPAITVLQLIP  |                                      | emPAI |
| 0.0012 R      | WIVNLIR T      |                                      |       |
| 0.0000022 R   | HLVFPFIFELQIQ  |                                      |       |
| 0.0023 K      | SLYHTEDAPQIR   | Oxidation (M) 0.00000000002000.0     |       |
| 0.0093 R      | VEDGNFSTVPI L  |                                      |       |
| 0.0000006 K   | SLEEAAPLVS A   |                                      |       |
| 0.00000011 K  | LAIFTALAFSQ L  |                                      |       |
| 0.0048 R      | EAILPSVVYIQI   |                                      |       |
| 0.00000045 R  | FLQSLELFEENIK  |                                      |       |
| 0.0028 R      | SLYELDVLAED K  |                                      |       |
| 0.000098 K    | LPETEVVHVIM N  |                                      | emPAI |
| 0.0000036 K   | FTSLPPLFENSFE  |                                      |       |
| 9.4E-09 R     | QTAPDATYVY T   |                                      |       |
| 0.0000074 R   | NRIPQSPQENIL   |                                      | emPAI |
| 0.000013 R    | IAGLEVLR I     |                                      |       |
| 0.00026 R     | VVDWLASTFK K   |                                      |       |
| 0.00012 K     | NQADSVVYQTQ    |                                      |       |
| 0.000000086 K | QFAAEEISAQVK   |                                      | emPAI |
| 0.000051 K    | ILQLLR L       |                                      |       |
| 0.000083 K    | LLFIIR I       |                                      |       |
| 0.0001 K      | EANNFLWPFC A   |                                      |       |
| 5.7E-10 R     | IALTDNSIVDQH   |                                      | emPAI |
| 0.0012 K      | IAELVENK T     |                                      |       |
| 0.0000052 K   | ELLQAFIDFR C   |                                      |       |
| 3.3E-09 K     | EATESYMSYAI A  |                                      |       |
| 0.0062 R      | LDPLAEAVLLS E  |                                      | emPAI |
| 0.00000012 K  | LVVIVDVVDQIA   |                                      |       |
| 9.7E-11 R     | LSLTDIVIDINR V |                                      | emPAI |
| 0.000063 K    | ILLENAGAVFR T  |                                      |       |
| 9.6E-09 R     | LLGLDTILNIVR   |                                      |       |
| 0.00000067 R  | APLVVAAIQTL K  |                                      | emPAI |
| 0.0000053 R   | GLLGTVGTIARE   |                                      |       |
| 0.0014 K      | SALAGDVTLPIY   |                                      |       |
| 0.000088 R    | ALWTGLGPN N    |                                      |       |

|             |   |                 |                                      |       |
|-------------|---|-----------------|--------------------------------------|-------|
| 0.00000086  | R | YSGALNAYSTI' Q  |                                      | emPAI |
| 0.00014     | R | TSISGHLR N      |                                      |       |
| 0.000013    | R | SWNVLDILVDT Q   |                                      |       |
| 0.000053    | K | AIQTIDADIAQ R   |                                      |       |
| 0.00005     | K | IDLLPEIVEAPC A  |                                      | emPAI |
| 0.00039     | R | TCYAQSSQIR Q    |                                      |       |
| 0.00000028  | K | ATQGIYPLQN\ K   |                                      |       |
| 0.00004     | K | LMDVHGDYS\ V    | Oxidation (M) 0.0200000000000000.0   |       |
| 0.0000042   | K | VDRPADEMA\ -    | Oxidation (M) 0.000000020000000000.0 | emPAI |
| 0.00032     | R | IIDLIEGR S      |                                      |       |
| 0.0047      | K | TLAFGIPIIK R    |                                      |       |
| 0.00014     | K | GWVTLQLIR D     |                                      |       |
| 0.00054     | R | SVTGFLSDLYR T   |                                      |       |
| 0.0000033   | R | TILSDLITVYAK G  |                                      |       |
| 0.000023    | K | GTDALAAALA\ S   |                                      | emPAI |
| 0.0012      | K | TSLNGIPLLVL\ C  |                                      |       |
| 0.00000002  | K | NSTNIDQVIDV H   |                                      |       |
| 0.000000028 | K | EALTDDEMGLT\ E  | Oxidation (M) 0.000000200000000.0    | emPAI |
| 0.0042      | R | VLNPNAEVLN S    |                                      |       |
| 0.0021      | K | GIDPPSLDLLA\ E  |                                      |       |
| 0.0000055   | R | QLINSGPVIAS\ A  |                                      |       |
| 1.5E-09     | K | LYEGLADQLT\ K   |                                      | emPAI |
| 0.0032      | M | APVSALAK Y      |                                      |       |
| 0.0000068   | K | LVFLGDQSVGI T   |                                      |       |
| 0.00004     | R | LQLWDTAGQ\ F    |                                      |       |
| 0.000000017 | R | DSSVAVIVYDV Q   |                                      | emPAI |
| 0.0000041   | K | LLLIGDSGVGK S   |                                      |       |
| 0.0034      | K | GQALADEYGII F   |                                      |       |
| 0.00004     | K | LQIWDTAGQE F    |                                      |       |
| 0.00000013  | K | TNLNVVEEVFFS D  |                                      | emPAI |
| 0.0000011   | K | NPVLTSFATGF A   |                                      |       |
| 4E-10       | K | AVVSSPLGGEFS    |                                      | emPAI |
| 0.00012     | M | GIDLIAGGK S     |                                      |       |
| 0.000000061 | R | APLQNTVLLI G    |                                      |       |
| 0.00000026  | K | AGGECLTFDQ A    |                                      | emPAI |
| 0.0091      | K | LGGAFAPK P      |                                      |       |
| 0.0044      | K | LTIIEEAR K      |                                      |       |
| 0.00011     | R | LGNVYTIGK G     |                                      |       |
| 0.004       | R | ECLPLVLIIR N    |                                      |       |
| 0.00000019  | K | FDVGNVVMV\ N    | Oxidation (M) 0.0000000200000.0      | emPAI |
| 6.3E-09     | R | LQAQTEAVNL T    |                                      |       |
| 0.00000019  | K | TQSNPENTVG G    | Oxidation (M) 0.00000000000002000.0  | emPAI |
| 0.0019      | R | ESAIAQIIR T     |                                      |       |
| 0.000012    | R | LGNLGTISQN\ V   |                                      |       |
| 0.00042     | R | TCGPLLDVVAI E   |                                      |       |
| 7.3E-09     | K | VPYQGGAVEL E    |                                      | emPAI |
| 0.0037      | K | VLSMAPGLER L    | Oxidation (M) 0.0002000000.0         |       |
| 0.0000023   | R | SQDFLFISGTK M   |                                      |       |
| 0.000000022 | K | NPVLLLNPLG\ C A |                                      |       |
| 0.0028      | R | NPVHNGHALL R    | Oxidation (M) 0.000000000020000.0    | emPAI |
| 0.0034      | R | DGVLWLIDR Y     |                                      |       |
| 0.000000026 | R | LSGLVNNLISIC E  |                                      |       |
| 0.000000074 | R | LASFQNAPSV\ F Q |                                      | emPAI |
| 0.000004    | K | EQIQAYVFDV\ A   |                                      |       |
| 0.000029    | K | ASADDAFYEL\ C E |                                      |       |
| 0.0000005   | K | EVMDLIMITQ\ D   |                                      | emPAI |
| 4.2E-11     | K | QSNILEDLATL\ L  |                                      |       |
| 0.00011     | R | YVYQPIEALFLI Q  |                                      | emPAI |

|             |   |               |   |                                         |       |
|-------------|---|---------------|---|-----------------------------------------|-------|
| 0.003       | R | AITSAAYR      | G |                                         |       |
| 0.005       | K | VVLIGDSGVGFS  |   |                                         |       |
| 0.000096    | K | STIGVEFATR    | S |                                         |       |
| 0.000011    | R | HLVAVQTEDA    | S |                                         |       |
| 0.00000097  | R | GAVGALLVYD    | H |                                         | emPAI |
| 0.0015      | K | HLSEMVVSK     | A | Oxidation (M) 0.000020000.0             |       |
| 0.0052      | K | NLSEIPDFK     | M |                                         |       |
| 0.000018    | K | IAFILEQVR     | L |                                         |       |
| 0.00000019  | K | DSNEILNSWA    | L |                                         |       |
| 0.00013     | K | EGDNMVEEAF    | R | Oxidation (M) 0.00002000000000000000.0  | emPAI |
| 0.00043     | R | LALPQIEDIVR   | A |                                         |       |
| 2.5E-11     | K | LAEEGISAEVINS |   |                                         |       |
| 0.0066      | R | IAGADVPMPLY   | L | Oxidation (M) 0.0000000200000000.0      | emPAI |
| 0.000015    | K | AIILVTSDVSAFG |   |                                         |       |
| 0.00019     | K | TVAFLPAIEA    | S |                                         |       |
| 0.0012      | K | VLVLDEADHLI   | R | Oxidation (M) 0.0000000000002000.0      |       |
| 0.00000075  | K | SLIEDEAELSD   | T |                                         | emPAI |
| 0.0012      | K | YSGTVQGLK     | H |                                         |       |
| 0.0000098   | R | TGNENAQLTP    | L |                                         |       |
| 0.000000017 | R | TESAAVSTIVN   | E |                                         | emPAI |
| 0.0018      | R | LAAELAER      | R |                                         |       |
| 0.00000065  | K | VATELGLWQES   |   |                                         |       |
| 0.0034      | K | QDALQALHDL    | R |                                         |       |
| 0.0000034   | R | DRPDLSAPESL   | F |                                         | emPAI |
| 0.00066     | K | KLEDIVPSSHN   | V |                                         |       |
| 1.8E-11     | R | VDYQLIDITED   | D |                                         | emPAI |
| 0.0027      | K | LAVLQFYK      | V |                                         |       |
| 0.000047    | R | TLADYNIQK     | E |                                         |       |
| 0.0000099   | K | ESTLHLVLR     | L |                                         |       |
| 0.0000014   | K | TITLEVESSDTI  | A |                                         | emPAI |
| 0.000051    | K | ILQLLR        | L |                                         |       |
| 0.000083    | K | LLFIIR        | I |                                         |       |
| 0.00019     | R | ENFINELIR     | R |                                         |       |
| 0.0001      | K | EANNFLWPFC    | A |                                         |       |
| 0.00026     | K | HGIICTEDLIHE  | E |                                         | emPAI |
| 0.00000038  | K | NPAAIVGAGLF   | T |                                         |       |
| 0.000000029 | R | FASEVAGVQD    | G |                                         | emPAI |
| 0.00094     | K | SDTSVFDVFGFV  |   |                                         |       |
| 0.0013      | R | ALQFNTLPVVI   | T |                                         |       |
| 0.00045     | K | TATEPLNPSEL   | M |                                         |       |
| 0.000003    | R | GLAEDIENGV    | K |                                         |       |
| 0.00041     | K | SVETTLAELGV   | L |                                         | emPAI |
| 0.000059    | K | TVQGLIEELQK   | K |                                         |       |
| 0.0000037   | K | VGAATETELEI   | K |                                         |       |
| 0.00003     | R | APLLIIAEDVTC  | L |                                         |       |
| 6.1E-10     | K | EIALQQALDQJ   | G |                                         |       |
| 0.0055      | K | GELEGEMGD     | L | 3 Oxidation (M) 0.00000020000202000.0   |       |
| 0.0026      | K | AIGVNTENLLL   | S |                                         | emPAI |
| 0.00005     | R | LLILTDP       | T |                                         |       |
| 0.00032     | R | HTPGTFTNQML   |   | Oxidation (M) 0.000000000200000000.0    |       |
| 0.000000076 | K | EGALGNIPHAF   | F | Oxidation (M) 0.000000000000000000020.0 | emPAI |
| 0.00000052  | K | GLVLLSQSLK    | E |                                         |       |
| 0.00067     | K | ETGGVEAASLIV  |   |                                         |       |
| 0.000023    | R | AQGEAEAILAFA  |   |                                         |       |
| 0.0017      | R | AQILESEGER    | Q |                                         | emPAI |
| 0.0000015   | K | TPGPGAQSAL    | A |                                         |       |
| 0.000046    | K | VENVTLGPAV    | E |                                         |       |
| 0.0000092   | R | IEDVTPIPTDSIR |   |                                         | emPAI |



|             |   |               |   |                                              |       |
|-------------|---|---------------|---|----------------------------------------------|-------|
| 0.000005    | K | ENVSSEALEEA   | I |                                              | emPAI |
| 0.0000021   | K | TVESALNGLIN   | S |                                              |       |
| 0.000036    | K | TEKPQLLEEDE   | K |                                              | emPAI |
| 1.2E-09     | R | FGLLGLLSVIK   | M |                                              |       |
| 0.00027     | R | GGLGVSPILGM   | M |                                              | emPAI |
| 0.00000021  | R | NFVETVELQIG   | N |                                              |       |
| 0.00042     | K | QLFQNVQMS     | K | Oxidation (M) 0.0000002000000000.0           | emPAI |
| 0.00067     | K | AVLAVADLER    | R |                                              |       |
| 4.7E-09     | R | WVGGVELELI    | I |                                              | emPAI |
| 0.0019      | R | TTLNGISFK     | N |                                              |       |
| 0.000063    | R | ASGGFGSFVVA   | A |                                              |       |
| 0.00051     | K | DQIGSFFYPPIA  | A |                                              |       |
| 0.00028     | R | STIQVYPGAW    | T |                                              | emPAI |
| 0.00023     | R | VVGVLGSSSF    | G |                                              |       |
| 0.0000018   | R | SVIALHNLINN   | L |                                              |       |
| 0.0054      | K | VVVHPLVLLSI   | V |                                              |       |
| 0.00097     | K | LRENDLDVHA    | E |                                              | emPAI |
| 0.0000013   | R | ILALNASFFLK   | T |                                              |       |
| 0.00063     | R | TNVIPIEDAR    | H |                                              |       |
| 0.000058    | K | LAAAILGGVDIV  | V |                                              | emPAI |
| 0.00019     | R | SITIAEVEPLVK  | D |                                              |       |
| 0.0000013   | R | AALTQLLLYYT   | L |                                              |       |
| 0.0012      | K | SNTSLFVEELL   | F |                                              | emPAI |
| 0.0000011   | K | AGALGDSVTITE  | E |                                              |       |
| 0.000017    | K | ITVTADGQFSK   | R |                                              | emPAI |
| 0.0027      | R | IDDIVSGIK     | K |                                              |       |
| 9.4E-09     | K | IGDDFFSFIVD   | E |                                              | emPAI |
| 0.0037      | K | ALNECLNEITR   | A |                                              |       |
| 0.00000001  | R | IIEQAIFSELCK  | M |                                              | emPAI |
| 0.000000077 | K | YLSPLVDATLLIA | A |                                              |       |
| 0.0029      | K | LDTVNLIVLGA   | G |                                              | emPAI |
| 0.00000041  | R | TPILVATDVAA   | G |                                              |       |
| 0.0002      | R | MLDMGFEPQ     | K | 2 Oxidation (M) 0.2002000000.0               | emPAI |
| 0.00017     | R | HNTLLEEQR     | H |                                              |       |
| 0.000064    | R | ELLEQLLSTK    | M |                                              |       |
| 0.00046     | R | SFSVYNNPSAC   | K |                                              | emPAI |
| 0.00042     | R | LLSLPDFYDSSI  | I |                                              |       |
| 0.00000037  | R | VLGLIQNDEL    | L |                                              | emPAI |
| 0.00011     | R | VQEFDVLDW     | Q |                                              |       |
| 0.0005      | R | DILSIPVSAAAF  | E | Oxidation (M) 0.00000000000000002000.0       |       |
| 0.000091    | K | SILLEIPSLAR   | Q |                                              |       |
| 0.000049    | K | DLSVTGAGFN    | G |                                              |       |
| 0.0011      | K | LLTPVYFQFFLI  | L |                                              | emPAI |
| 0.000073    | K | DMTALDIPVV    | D | Oxidation (M) 0.02000000000000000000.0       |       |
| 0.00013     | K | AKDMTALDIP    | D | Oxidation (M) 0.0002000000000000000000.0     |       |
| 0.000011    | R | SKVEGAIESR    | G |                                              |       |
| 0.000011    | K | SLPLQTLIDILK  | Q |                                              | emPAI |
| 0.000000056 | K | AIGNFGLSLLR   | Q |                                              |       |
| 0.0089      | R | IAAPGISVWNIG  | G | Oxidation (M) 0.00000000000002000000000000.0 | emPAI |
| 0.0025      | K | IGLFGGAGVGIT  | T |                                              |       |
| 0.00000063  | R | DVNEQDVLLF    | F |                                              | emPAI |
| 0.0014      | R | VLIASDVWAR    | G |                                              |       |
| 0.000014    | K | LLVLDESDEMI   | G | Oxidation (M) 0.0000000002000.0              | emPAI |
| 0.0021      | K | LSIEDVEHLLMS  | S | Oxidation (M) 0.000000000020.0               |       |
| 0.000024    | K | SALLYLAYTSVIL | L |                                              | emPAI |
| 0.0012      | K | VGDFEMNLK     | R | Oxidation (M) 0.000002000.0                  |       |
| 0.00000068  | K | EGQVIGYLHQ    | L |                                              | emPAI |
| 0.0017      | R | ALLIDLEPR     | V |                                              |       |

|            |   |               |   |                                        |       |
|------------|---|---------------|---|----------------------------------------|-------|
| 0.000014   | R | DIIESLVDEYK   | A |                                        |       |
| 0.0027     | R | YPGYMNNDLV    | C | Oxidation (M) 0.00002000000000000000.0 | emPAI |
| 0.005      | R | YLEDVIAHK     | Q |                                        |       |
| 0.0000016  | K | SAQFVLDLLK    | N |                                        | emPAI |
| 0.00039    | K | KLEIDDDQK     | L |                                        |       |
| 0.00000081 | R | GCIVSPDLSVLI  | K |                                        | emPAI |
| 0.000021   | K | FVLLSTR       | A |                                        |       |
| 0.000016   | K | LALDALVIQQC   | L |                                        | emPAI |
| 0.000005   | R | VEPLVNMGQIA   | A | Oxidation (M) 0.000000200000.0         |       |
| 0.00094    | K | GQIYPEPGFEY   | Q |                                        | emPAI |
| 0.0022     | R | WLMQFGGFR     | E |                                        |       |
| 0.0000064  | R | LLADDFMAK     | L | Oxidation (M) 0.0000000200.0           |       |
| 0.0017     | K | ESGIELES LPK  | D |                                        | emPAI |
| 0.0000012  | K | EAAVSYLEGVI   | L |                                        |       |
| 0.0021     | K | LSIEDVEHLLMS  |   | Oxidation (M) 0.000000000020.0         | emPAI |
| 0.00063    | R | TNVIPIEDAR    | H |                                        |       |
| 0.00045    | R | ILALNASYFLK   | S |                                        |       |
| 0.000058   | K | LAAAILGGVDIV  | V |                                        | emPAI |
| 0.0088     | K | KLGGTVDDTH    | G |                                        |       |
| 0.0014     | K | SFAEALEVIPYIN | N |                                        |       |
| 0.00017    | K | VVSQYSTLLAP   | D |                                        |       |
| 0.0038     | R | NIVEQAAIR     | D |                                        |       |
| 0.0000035  | R | DVQEASVYEG    | L |                                        | emPAI |
| 0.00035    | K | AGALGDSVSIT   | E |                                        |       |
| 0.000017   | K | ITVTADGQFSK   | R |                                        | emPAI |
| 0.0000014  | K | EGLLQLVSDK    | A |                                        |       |
| 0.0022     | K | YAADEDAFFAIL  |   | Oxidation (M) 0.000000000000000020.0   | emPAI |
| 0.0057     | R | ASSLPSHALR    | S |                                        |       |
| 0.00047    | K | SLLFFQGQR     | S |                                        |       |
| 0.0014     | R | ASSGLSDGSAIF  | F |                                        |       |
| 0.0084     | R | DDYSHAEPAT    | S |                                        | emPAI |
| 0.00014    | K | KGLTPSQIGVIID | D |                                        |       |
| 0.0073     | K | TTPQDVDESIC   | F |                                        |       |
| 0.00016    | K | AHGLAPEIPED   | K |                                        | emPAI |
| 0.0014     | K | QSLPPGLSVQI   | - |                                        |       |
| 0.000032   | R | YLYTLCVFDQE   | A |                                        | emPAI |
| 0.0051     | R | VYVAIDQK      | T |                                        |       |
| 0.0000065  | R | GFGFVNFVSR    | E |                                        | emPAI |
| 0.0063     | R | VGVHHLDDSC    | N |                                        |       |
| 0.0000046  | R | NLIVFNLQNP    | C |                                        | emPAI |
| 0.000023   | K | VAVDGGQSDSI   | D |                                        |       |
| 0.00038    | K | AISSVPIHLSIY  | S |                                        | emPAI |
| 0.00023    | K | LPTAVLSTSVK   | A |                                        |       |
| 0.0087     | K | FSATAGLGVIH   | G |                                        |       |
| 0.0012     | R | IVSLLSESYNPT  | Y |                                        | emPAI |
| 0.0037     | K | EFVDIILSR     | T |                                        |       |
| 0.000015   | R | ITPSLAYLEQIR  | Q |                                        | emPAI |
| 0.00031    | R | TPVLVATDVA    | G |                                        |       |
| 0.0002     | R | MLDMGFEPQ     | K | 2 Oxidation (M) 0.20020000000.0        | emPAI |
| 0.0000096  | K | VTVVPSAAAL    | A |                                        |       |
| 0.0012     | K | HNGNISFDDV    | I |                                        | emPAI |
| 0.0033     | R | AAALNIVPTST   | A |                                        |       |
| 0.000014   | R | VVDLADIVANI   | - |                                        | emPAI |
| 0.003      | R | AITSAYYR      | G |                                        |       |
| 0.000096   | K | STIGVEFATR    | T |                                        |       |
| 0.0012     | K | AFQ TILGEIYHI | K |                                        | emPAI |
| 0.000079   | R | LLLPLLVSK     | S |                                        |       |
| 0.00014    | R | SYGFTDSQIST   | K |                                        | emPAI |

|            |              |                |                                                |             |                 |
|------------|--------------|----------------|------------------------------------------------|-------------|-----------------|
| 0.00005    | R            | VVCEATLSPEV I  |                                                |             |                 |
| 0.00012    | K            | QALPGLVPLLL Q  |                                                |             | emPAI           |
| 0.00047    | R            | KLQGEIDR V     |                                                |             |                 |
| 0.00021    | K            | SSLAASASQVFS   |                                                |             | emPAI           |
| 0.00036    | R            | IFEGEALLR R    |                                                |             |                 |
| 0.0064     | K            | QLVNIPSFMVIL   | Oxidation (M) 0.00000000200.0                  |             |                 |
| 0.0018     | R            | YGLLDESQNKI R  |                                                |             | emPAI           |
| 0.000063   | K            | ILLENAGAVFR T  |                                                |             |                 |
| 0.0069     | K            | VFESVLFPIFDY H |                                                |             | emPAI           |
| 0.00039    | K            | LAPSGFVLLR D   |                                                |             |                 |
| 0.0087     | K            | FSATAGLGVIH G  |                                                |             |                 |
| 0.0012     | R            | IVSLLSESYNPI Y |                                                |             | emPAI           |
| 0.00018    | K            | ILQEEIGGVK G   |                                                |             |                 |
| 0.00021    | K            | SFSSGGEDGY\ L  |                                                |             | emPAI           |
| 0.00087    | R            | DIVELQLK Q     |                                                |             |                 |
| 0.001      | K            | QLDCELVIR K    |                                                |             |                 |
| 0.009      | K            | ESSASSPELATI L |                                                |             | emPAI           |
| 0.0037     | K            | FIDAIAR N      |                                                |             |                 |
| 0.0005     | K            | SLADADYR V     |                                                |             |                 |
| 0.003      | R            | YAPGIEILSVR V  |                                                |             |                 |
| 0.0036     | R            | GGALLNIITEP\ L |                                                |             | emPAI           |
| 0.002      | K            | TIDVLSAADSII R |                                                |             |                 |
| 0.00068    | K            | TIDVLSAADSII H |                                                |             | emPAI           |
| 0.000025   | K            | AFQAVEQFLQ Q   |                                                |             |                 |
| 0.0011     | K            | LLPLLASSLEFG M |                                                |             | emPAI           |
| 0.0042     | R            | GDSVIVLR N     |                                                |             |                 |
| 0.000065   | K            | NNTQVLINCR N   |                                                |             | emPAI           |
| 0.005      | R            | VTYLVLDEADF M  |                                                |             |                 |
| 0.0002     | R            | MLDMGFDPQ K    | Methyl (DE); ;0.20020010000.0                  |             | emPAI           |
| 0.0074     | R            | WVLPDSYLDV N   |                                                |             |                 |
| 0.00028    | K            | TLAQIVGSEDE M  |                                                |             | emPAI           |
| 0.00053    | R            | YGDFFLR Q      |                                                |             |                 |
| 0.0023     | K            | LVDESVNSQLF D  |                                                |             | emPAI           |
| 0.00051    | K            | TVAFLPSIEA\ A  |                                                |             |                 |
| 0.0012     | K            | VLVLDEADHLI R  | Oxidation (M) 0.0000000000002000.0             |             | emPAI           |
| 0.0039     | R            | VIFAWLAYK Q    |                                                |             |                 |
| 0.00072    | R            | AAEILFGLGFD E  |                                                |             | emPAI           |
| 0.0033     | K            | AVILLQGR Y     |                                                |             |                 |
| 0.00031    | K            | EVATLDALQSI D  |                                                |             | emPAI           |
| 0.0077     | K            | GYIPLSTYLR T   |                                                |             |                 |
| 0.00056    | K            | GPKPGFMVECG    | 2 Oxidation (M) 0.00000020002000000000000000.0 |             | emPAI           |
| 0.0062     | K            | LLTEAPK F      |                                                |             |                 |
| 0.00046    | R            | MVSAHSSQQI A   | Oxidation (M) 0.2000000000000.0                |             | emPAI           |
| 0.0067     | K            | DVIFVTTR R     |                                                |             |                 |
| 0.0062     | R            | TLTSVHEAMLIR   | Oxidation (M) 0.000000002000000000000.0        |             | emPAI           |
| 0.0071     | R            | SQIQTEAVQVI T  |                                                |             | emPAI           |
| 0.0062     | K            | LLTEAPK F      |                                                |             |                 |
| 0.0044     | R            | MVAAHSSQQI A   | Oxidation (M) 0.2000000000000.0                |             | emPAI           |
| 0.0084     | R            | KPSPTVIEK L    |                                                |             |                 |
| 0.0068     | K            | DIVSSFLPEVIL E |                                                |             | emPAI           |
| pep_expect | pep_res_befo | pep_seq        | pep_res_after                                  | pep_var_mod | pep_var_mod_pos |
| 0.00000096 | K            | SSVCDIAPK G    |                                                |             |                 |
| 0.0000019  | R            | YLTASAVFR G    |                                                |             |                 |
| 0.0021     | K            | NMMCAADPR H    |                                                |             |                 |
| 0.00000028 | K            | LAVNLIPFR L    |                                                |             |                 |
| 0.0025     | R            | FPGQLNSDLR K   |                                                |             |                 |
| 0.0000021  | R            | VSEQFTAMFR R   | Oxidation (M) 0.0000000200.0                   |             |                 |
| 0.0023     | R            | FPGQLNSDLRI L  |                                                |             |                 |

|              |                |                                                      |
|--------------|----------------|------------------------------------------------------|
| 0.00024 R    | RVSEQFTAMF R   |                                                      |
| 7.2E-09 R    | MMMTFSVFP V    | 2 Oxidation (N 0.202000000000.0                      |
| 0.0000013 K  | EVDEQMMNI N    |                                                      |
| 0.00000061 R | LHFFMVGFP G    |                                                      |
| 0.0000028 R  | AVLMDLEPGT S   | 2 Oxidation (N 0.000200000020000.0                   |
| 0.0000061 K  | NSSYFVEWIP S   |                                                      |
| 0.0000043 R  | IDVVFNEASGC A  |                                                      |
| 5.8E-10 R    | EILHIQGGQC F   |                                                      |
| 3.9E-11 K    | MASTFIGNST S R | 2 Oxidation (N 0.2000000000000200.0                  |
| 4.5E-15 K    | GHYTEGAELIC K  |                                                      |
| 1.2E-12 K    | GHYTEGAELIC E  |                                                      |
| 0.000063 -   | MREILHIQGGC F  |                                                      |
| 0.0000087 R  | GSQQYSALSVI N  |                                                      |
| 1.3E-09 K    | LANPTFGDLNI F  | Oxidation (M) 0.00000000000000020000000.0            |
| 0.0000092 R  | SGPFGQIFRPE G  |                                                      |
| 0.0036 K     | FWEVICDEHG I   |                                                      |
| 0.000085 K   | EAENSDCLQG I   | Oxidation (M) 0.0000000000000000000002000000.0       |
| 0.0035 K     | VSDTVVEPYN, T  | 2 Methyl (DE) 0.001000100000000000000002000000 emPAI |
| 0.0000019 R  | YLTASAVFR G    |                                                      |
| 0.0021 K     | NMMCAADPR H    |                                                      |
| 0.0000028 K  | LAVNLIPFR L    |                                                      |
| 0.0025 R     | FPGQLNSDLR K   |                                                      |
| 0.0000021 R  | VSEQFTAMFR R   | Oxidation (M) 0.0000000200.0                         |
| 0.0023 R     | FPGQLNSDLRI L  |                                                      |
| 0.00017 R    | INVVFNEASGC Y  |                                                      |
| 0.00024 R    | RVSEQFTAMF R   |                                                      |
| 7.2E-09 R    | MMMTFSVFP V    | 2 Oxidation (N 0.202000000000.0                      |
| 0.00000061 R | LHFFMVGFP G    |                                                      |
| 0.0000028 R  | AVLMDLEPGT S   | 2 Oxidation (N 0.000200000020000.0                   |
| 0.0000061 K  | NSSYFVEWIP S   |                                                      |
| 5.8E-10 R    | EILHIQGGQC F   |                                                      |
| 3.9E-11 K    | MASTFIGNST S R | 2 Oxidation (N 0.2000000000000200.0                  |
| 4.5E-15 K    | GHYTEGAELIC K  |                                                      |
| 1.2E-12 K    | GHYTEGAELIC E  |                                                      |
| 0.000063 -   | MREILHIQGGC F  |                                                      |
| 0.0000087 R  | GSQQYSALSVI N  |                                                      |
| 1.3E-09 K    | LANPTFGDLNI F  | Oxidation (M) 0.00000000000000020000000.0            |
| 0.0000092 R  | SGPFGQIFRPE G  |                                                      |
| 1.1E-09 K    | FWEVICGEHG I   |                                                      |
| 0.0000011 K  | EAENCDCLQG I   | Oxidation (M) 0.0000000000000000000002000000.0       |
| 0.0035 K     | VSDTVVEPYN, T  | 2 Methyl (DE) 0.001000100000000000000002000000 emPAI |
| 0.0021 K     | NMMCAADPR H    |                                                      |
| 0.0000028 K  | LAVNLIPFR L    |                                                      |
| 0.0025 R     | FPGQLNSDLR K   |                                                      |
| 0.0000021 R  | VSEQFTAMFR R   | Oxidation (M) 0.0000000200.0                         |
| 0.0023 R     | FPGQLNSDLRI L  |                                                      |
| 0.0024 K     | STVCDIPPTGL M  |                                                      |
| 0.0000037 R  | YTGDSDLQLEF I  |                                                      |
| 0.00024 R    | RVSEQFTAMF R   |                                                      |
| 0.0000004 R  | MMLTFSVFPS V   |                                                      |
| 1.2E-09 R    | INVYYNEASCC F  |                                                      |
| 0.0000022 K  | EVDEQMLNV( N   |                                                      |
| 0.00000061 R | LHFFMVGFP G    |                                                      |
| 0.0000028 R  | AVLMDLEPGT S   | 2 Oxidation (N 0.000200000020000.0                   |
| 0.0000061 K  | NSSYFVEWIP S   |                                                      |
| 0.0000037 R  | SLTVPELTQQM N  | Oxidation (M) 0.00000000020000.0                     |
| 5.8E-10 R    | EILHIQGGQC F   |                                                      |
| 0.0000011 K  | FWEVCAEH( Y    |                                                      |

|               |               |                                                      |
|---------------|---------------|------------------------------------------------------|
| 3.9E-11 K     | MASTFIGNSTSR  | 2 Oxidation (M) 0.2000000000000200.0                 |
| 4.5E-15 K     | GHYTEGAELIDK  |                                                      |
| 1.2E-12 K     | GHYTEGAELIDE  |                                                      |
| 0.000063 -    | MREILHIQGGCF  |                                                      |
| 0.000056 K    | LTPPSFGDLNLF  |                                                      |
| 0.00000011 R  | SGPYGQTFRPIG  |                                                      |
| 0.000011 K    | EAENCDCLQGI   | Oxidation (M) 0.0000000000000000000002000000.0       |
| 0.0035 K      | VSDTVVEPYN,T  | 2 Methyl (DE) 0.001000100000000000000002000000 emPAI |
| 0.0021 K      | NMMCAADPRH    |                                                      |
| 0.00000028 K  | LAVNLIPFPR L  |                                                      |
| 0.0025 R      | FPGQLNSDLR K  |                                                      |
| 0.0000021 R   | VSEQFTAMFR R  | Oxidation (M) 0.0000000200.0                         |
| 0.0023 R      | FPGQLNSDLRIL  |                                                      |
| 0.0024 K      | STVCDIPPTGL M |                                                      |
| 0.0000022 R   | YVGDESELQLEFV |                                                      |
| 0.00024 R     | RVSEQFTAMFR   |                                                      |
| 0.000000024 R | VNVYYNEASCY   |                                                      |
| 7.2E-09 R     | MMMTFSVFPV    | 2 Oxidation (M) 0.202000000000.0                     |
| 0.00000022 K  | EVDEQMLNVGN   |                                                      |
| 0.000000061 R | LHFFMVGFPAG   |                                                      |
| 0.000014 R    | AVLMDLEPGT S  |                                                      |
| 0.00000061 K  | NSSYFVEWIPIS  |                                                      |
| 0.0092 R      | NLTVPELTQQIN  |                                                      |
| 3.9E-10 K     | FWEVVNLEHCY   |                                                      |
| 3.9E-11 K     | MASTFIGNSTSR  | 2 Oxidation (M) 0.2000000000000200.0                 |
| 4.5E-15 K     | GHYTEGAELIDK  |                                                      |
| 1.2E-12 K     | GHYTEGAELIDE  |                                                      |
| 0.000024 K    | LSTPSFGDLNLF  |                                                      |
| 9.1E-09 R     | SGPYGQIFRPIG  |                                                      |
| 0.000011 K    | EAENCDCLQGI   | Oxidation (M) 0.0000000000000000000002000000.0       |
| 0.0035 K      | VSDTVVEPYN,T  | 2 Methyl (DE) 0.001000100000000000000002000000 emPAI |
| 0.0021 K      | NMMCAADPRH    |                                                      |
| 0.00000028 K  | LAVNLIPFPR L  |                                                      |
| 0.0025 R      | FPGQLNSDLR K  |                                                      |
| 0.0000021 R   | VSEQFTAMFR R  | Oxidation (M) 0.0000000200.0                         |
| 0.0023 R      | FPGQLNSDLRIL  |                                                      |
| 0.0024 K      | STVCDIPPTGL M |                                                      |
| 0.000099 R    | YQGENDLQLE V  |                                                      |
| 0.00024 R     | RVSEQFTAMFR   |                                                      |
| 0.0000004 R   | MMLTFSVFPS V  |                                                      |
| 0.000000024 R | VNVYYNEASC F  |                                                      |
| 0.00000022 K  | EVDEQMINVGN   |                                                      |
| 0.000000061 R | LHFFMVGFPAG   |                                                      |
| 0.000014 R    | AVLMDLEPGT S  |                                                      |
| 0.00000061 K  | NSSYFVEWIPIS  |                                                      |
| 5.8E-10 R     | EILHIQGGQCF   |                                                      |
| 3.9E-11 K     | MASTFIGNSTSR  | 2 Oxidation (M) 0.2000000000000200.0                 |
| 4.5E-15 K     | GHYTEGAELIDK  |                                                      |
| 1.2E-12 K     | GHYTEGAELIDE  |                                                      |
| 0.000063 -    | MREILHIQGGCF  |                                                      |
| 0.000056 K    | LTPPSFGDLNLF  |                                                      |
| 9.1E-09 R     | SGPYGQIFRPIG  |                                                      |
| 0.000011 K    | EAENCDCLQGI   | Oxidation (M) 0.0000000000000000000002000000.0       |
| 0.0035 K      | VSDTVVEPYN,T  | 2 Methyl (DE) 0.001000100000000000000002000000 emPAI |
| 0.00053 R     | LSVDYGKK S    |                                                      |
| 0.0019 K      | DVNAAVGTIK T  |                                                      |
| 0.000014 K    | YMACCLMYR G   | Oxidation (M) 0.000000200.0                          |
| 0.0046 R      | IDHKFDLMYAIR  |                                                      |

|               |                            |                 |                              |
|---------------|----------------------------|-----------------|------------------------------|
| 1.6E-09 R     | LVSQVISSLTA <sup>5</sup> F |                 |                              |
| 0.00000053 R  | TIQFVDWCPT <sup>7</sup> C  |                 |                              |
| 0.0011 R      | SLNIERPTYTNL               |                 |                              |
| 0.00000004 R  | AVFVDLEPTVI <sup>7</sup> T | Methyl (DE)     | 0.000000000000100.0          |
| 4.3E-09 R     | IHFMLSSYAPV <sup>7</sup> A |                 |                              |
| 4E-11 R       | AVCMISNSTS\I               |                 |                              |
| 0.000015 K    | CGINYQPPTV\V               |                 |                              |
| 0.00014 R     | GHYTIGKEIVD <sup>7</sup> I |                 |                              |
| 4.1E-11 K     | TVGGGDDAF <sup>7</sup> H   |                 |                              |
| 0.0097 R      | AVFVDLEPTVI <sup>7</sup> Q |                 |                              |
| 0.000047 R    | AFVHWYVGE <sup>6</sup> E   | Oxidation (M)   | 0.00000000002000000000.0     |
| 0.000000015 R | QLFHPEQLISG <sup>7</sup> G |                 |                              |
| 1.9E-11 R     | FDGALNVDVT <sup>7</sup> I  |                 |                              |
| 8E-11 K       | RAFVHWYVGI <sup>6</sup> E  | Oxidation (M)   | 0.000000000002000000000.0    |
| 0.0000027 K   | AFHEQLSVAEI <sup>7</sup> C | 2 Oxidation (M) | 0.000000000000000000002200.0 |
| 5.1E-09 K     | LADNCTGLQG <sup>7</sup> L  |                 |                              |
| 2.4E-11 R     | KLADNCTGLQ <sup>7</sup> L  |                 | emPAI                        |
| 0.00053 R     | LSVDYGKK <sup>7</sup> S    |                 |                              |
| 0.0019 K      | DVNAAVGTIK <sup>7</sup> T  |                 |                              |
| 0.000014 K    | YMACCLMYR <sup>7</sup> G   | Oxidation (M)   | 0.000000200.0                |
| 0.0046 R      | IDHKFDLMYAI <sup>7</sup> R |                 |                              |
| 1.6E-09 R     | LVSQVISSLTA <sup>5</sup> F |                 |                              |
| 0.00000053 R  | TIQFVDWCPT <sup>7</sup> C  |                 |                              |
| 0.0055 R      | SLSIERPTYTNL               |                 |                              |
| 0.00000004 R  | AVFVDLEPTVI <sup>7</sup> T | Methyl (DE)     | 0.000000000000100.0          |
| 4.3E-09 R     | IHFMLSSYAPV <sup>7</sup> A |                 |                              |
| 4E-11 R       | AVCMISNSTS\I               |                 |                              |
| 0.000015 K    | CGINYQPPTV\V               |                 |                              |
| 0.00014 R     | GHYTIGKEIVD <sup>7</sup> I |                 |                              |
| 4.1E-11 K     | TVGGGDDAF <sup>7</sup> H   |                 |                              |
| 0.0097 R      | AVFVDLEPTVI <sup>7</sup> Q |                 |                              |
| 0.000047 R    | AFVHWYVGE <sup>6</sup> E   | Oxidation (M)   | 0.00000000002000000000.0     |
| 0.000000015 R | QLFHPEQLISG <sup>7</sup> G |                 |                              |
| 1.9E-11 R     | FDGALNVDVT <sup>7</sup> I  |                 |                              |
| 8E-11 K       | RAFVHWYVGI <sup>6</sup> E  | Oxidation (M)   | 0.000000000002000000000.0    |
| 0.0000027 K   | AFHEQLSVAEI <sup>7</sup> C | 2 Oxidation (M) | 0.000000000000000000002200.0 |
| 5.1E-09 K     | LADNCTGLQG <sup>7</sup> L  |                 |                              |
| 2.4E-11 R     | KLADNCTGLQ <sup>7</sup> L  |                 | emPAI                        |
| 0.0049 R      | MLFDIQK <sup>7</sup> F     |                 |                              |
| 0.00057 R     | ELAQQIEK <sup>7</sup> V    |                 |                              |
| 0.00000064 R  | VLITDILLAR <sup>7</sup> G  |                 |                              |
| 0.000045 K    | VHACVGGTSV <sup>7</sup> E  |                 |                              |
| 0.0025 M      | AGSAPEGTQF <sup>7</sup> Q  |                 |                              |
| 3.9E-09 K     | GLDVIQQAQS <sup>7</sup> T  |                 |                              |
| 5.6E-09 K     | GVAINFVTLDI <sup>7</sup> M |                 |                              |
| 5.9E-09 R     | ILQAGVHV\V                 |                 |                              |
| 4.7E-10 R     | KGVAINFVTL <sup>7</sup> M  |                 |                              |
| 5.7E-10 K     | MFVLDEADEN <sup>7</sup> G  | 2 Oxidation (M) | 0.2000000002000.0            |
| 4.3E-09 R     | GIYAYGFEKPS <sup>7</sup> G |                 |                              |
| 0.0000079 K   | FYNVVEELPS <sup>7</sup> -  |                 |                              |
| 2.2E-09 R     | SRDHTVSATH <sup>7</sup> D  |                 |                              |
| 7.9E-10 K     | IQGVFSATM <sup>7</sup> K   | Oxidation (M)   | 0.0000000002000000000.0      |
| 0.000000092 K | LETLCDLYETL <sup>7</sup> R |                 |                              |
| 6.9E-12 R     | GIDVQQVSLVI <sup>7</sup> I |                 |                              |
| 0.0077 K      | TATFCSGVLQ <sup>6</sup> E  |                 | emPAI                        |
| 0.0049 R      | MLFDIQK <sup>7</sup> F     |                 |                              |
| 0.0018 R      | ALGDYLGVK <sup>7</sup> V   |                 |                              |
| 0.00057 R     | ELAQQIEK <sup>7</sup> V    |                 |                              |

|            |   |              |   |                                                    |
|------------|---|--------------|---|----------------------------------------------------|
| 0.000042   | K | GVAINFVTR    | D |                                                    |
| 0.00019    | R | KGVAINFVTR   | D |                                                    |
| 0.0000064  | R | VLITDLLAR    | G |                                                    |
| 0.000045   | K | VHACVGGTSV   | E |                                                    |
| 3.9E-09    | K | GLDVIQQAQS   | T |                                                    |
| 5.9E-09    | R | ILQAGVHVVV   | V |                                                    |
| 5.7E-10    | K | MFVLDEADEN   | G | 2 Oxidation (M) 0.200000002000.0                   |
| 4.3E-09    | R | GIYAYGFEKPS  | G |                                                    |
| 0.0000079  | K | FYNVVVEELPS  | - |                                                    |
| 2.2E-09    | R | SRDHTVSATH   | D |                                                    |
| 7.9E-10    | K | IQVGVFSATM   | K | Oxidation (M) 0.00000000200000000.0                |
| 0.00000092 | K | LETLCDLYETL  | R |                                                    |
| 6.9E-12    | R | GIDVQQVSLVI  | I |                                                    |
| 0.0000022  | K | LNEVLEGQDEI  | G | Oxidation (M) 0.0000000000000000000020000000 emPAI |
| 0.00053    | R | LSVDYGKK     | S |                                                    |
| 0.0019     | K | DVNAAVGTIK   | T |                                                    |
| 0.000014   | K | YMACCLMYR    | G | Oxidation (M) 0.00000200.0                         |
| 0.0046     | R | IDHKFDLMYAI  | R |                                                    |
| 1.5E-11    | R | LISQISSLTSL  | F |                                                    |
| 0.0000055  | R | TVQFVDWCP    | C |                                                    |
| 0.00014    | R | SLDIERPTYTNI | L |                                                    |
| 0.0000004  | R | AVFVDLEPTVI  | T | Methyl (DE) 0.00000000000100.0                     |
| 0.0000057  | R | IHFMLSSYAPV  | A |                                                    |
| 9.7E-11    | R | AVCMISNNTA   | I |                                                    |
| 0.000015   | K | CGINYQPPTV   | V |                                                    |
| 0.0097     | R | AVFVDLEPTVI  | Q |                                                    |
| 0.000047   | R | AFVHWYVGE    | E | Oxidation (M) 0.000000000200000000.0               |
| 0.00000015 | R | QLFHPEQLISG  | G |                                                    |
| 8E-11      | K | RAFVHWYVGE   | E | Oxidation (M) 0.0000000000200000000.0              |
| 0.0022     | K | AYHEQLSVPEI  | C | 2 Oxidation (M) 0.0000000000000000002200.0         |
| 5.1E-09    | K | LADNCTGLQG   | L |                                                    |
| 2.4E-11    | R | KLADNCTGLQ   | L | emPAI                                              |
| 0.00078    | K | FEAIIYVLK    | K |                                                    |
| 0.000023   | K | TVGAGVIGTIL  | - |                                                    |
| 6.6E-09    | K | VGETVDLVGLI  | E |                                                    |
| 0.000045   | R | SYTVTGVEMF   | I |                                                    |
| 0.0000045  | K | KYDEIDAAPEE  | A |                                                    |
| 5.4E-10    | K | ILDEALAGDN   | G |                                                    |
| 0.000026   | R | HYAHVDCPG    | N |                                                    |
| 2.1E-10    | R | GITINTATVEYI | H |                                                    |
| 0.0000013  | K | IVVELIVVACI  | F |                                                    |
| 2.7E-12    | K | TTLTAALTMAI  | K | Oxidation (M) 0.000000020000000000.0               |
| 2.1E-12    | K | EDQVDDAELL   | E |                                                    |
| 8.3E-10    | R | QTELPFLlave  | G | Methyl (DE) 0.001000000000000000.0                 |
| 0.000054   | R | SYTVTGVEMF   | G |                                                    |
| 0.0000039  | R | ELLSSYEFNGD  | V | emPAI                                              |
| 0.000029   | R | VVQILAR      | R |                                                    |
| 0.00016    | K | AEIANVLSR    | G |                                                    |
| 0.00063    | R | LDEMIVFR     | Q | Oxidation (M) 0.00020000.0                         |
| 0.000075   | R | HAQLPEEAR    | E |                                                    |
| 0.0022     | K | EIELQVTER    | F |                                                    |
| 0.000013   | R | VLELSLEEAR   | Q |                                                    |
| 0.0000047  | K | AIDLIDEAGSR  | V |                                                    |
| 0.000025   | R | LDMSEFMER    | H | Oxidation (M) 0.00000200.0                         |
| 0.00037    | K | HIEKDPALER   | R |                                                    |
| 0.00016    | R | SQDFEMAGS    | D |                                                    |
| 0.0093     | K | RVLELSLEEAR  | Q |                                                    |
| 0.0084     | R | LRHAQLPEEAI  | E |                                                    |

|            |   |                  |                                                         |
|------------|---|------------------|---------------------------------------------------------|
| 0.000012   | K | LAEEGKLDPV\ Q    |                                                         |
| 0.000073   | R | VLENLGADPSIT     |                                                         |
| 0.000048   | R | VVDEGFDPSY\ P    |                                                         |
| 0.000042   | R | GSGFVAVEIPF A    |                                                         |
| 0.000022   | K | MPTLEEYGTN L     |                                                         |
| 0.000037   | K | ALAAYYFGSEE L    |                                                         |
| 2.3E-10    | K | VPEPTVEEAIQ E    |                                                         |
| 0.0032     | K | AHPDVFNMML       |                                                         |
| 0.0000022  | R | QLGHNYIGSE\ E    |                                                         |
| 0.000038   | R | YTDEALVAAA\ F    |                                                         |
| 1.8E-10    | K | LIGSPPGYVGY R    |                                                         |
| 0.000035   | R | TVDFKNTLLIM G    |                                                         |
| 0.006      | R | FQPVKVPEPT\ E    |                                                         |
| 5.7E-09    | R | LGHNFGTEQ V      |                                                         |
| 0.000058   | R | RLGHNFVGT E V    |                                                         |
| 0.000056   | K | AENEAEEGGP V     |                                                         |
| 0.0029     | R | QSDEIILFIDEV G   | emPAI                                                   |
| 0.00039    | K | SSVCDIAPR G      |                                                         |
| 0.0021     | K | NMMCAADPR H      |                                                         |
| 0.0000028  | K | LAVNLIPFPR L     |                                                         |
| 0.0025     | R | FPGQLNSDLR K     |                                                         |
| 0.000021   | R | VSEQFTAMFR R     | Oxidation (M) 0.000000200.0                             |
| 0.0023     | R | FPGQLNSDLRI L    |                                                         |
| 0.000054   | R | YVGNSDLQLEI V    |                                                         |
| 0.00024    | R | RVSEQFTAMF R     |                                                         |
| 0.000004   | R | MMLTFSVFPS V     |                                                         |
| 0.00000024 | R | VNVYYNEASC\ Y    |                                                         |
| 0.0000022  | K | EVDEQMINV C N    |                                                         |
| 0.00000061 | R | LHFFMVGFAP G     |                                                         |
| 0.0000061  | K | NSSYFVEWIP\ S    |                                                         |
| 9.6E-12    | K | GHYTEGAELI C K   |                                                         |
| 0.000013   | K | GHYTEGAELI E     |                                                         |
| 0.000056   | K | LTTSPFGDLN\ F    |                                                         |
| 0.000015   | R | TGPYGQIFRPI G    |                                                         |
| 0.000011   | K | EAENCDC LQ G I   | Oxidation (M) 0.00000000000000000000000020000000.0      |
| 0.0035     | K | VSDTVVEPYN\ T    | 2 Methyl (DE) 0.00100010000000000000000002000000\ emPAI |
| 0.000023   | K | DAGVIAGLN V I    |                                                         |
| 0.000097   | R | VEIANDQGN\ T     |                                                         |
| 0.0000062  | R | FSDSSVQSDM L     |                                                         |
| 0.0006     | R | MVNHVFQEF\ R     |                                                         |
| 0.0025     | R | FEELNMDLFR K     |                                                         |
| 0.000092   | K | NALENYAYN\ N     |                                                         |
| 0.0011     | K | ELESICNPIA K M   |                                                         |
| 0.000054   | K | STVHDVV L V G I  |                                                         |
| 0.000003   | R | TTPSYVAFTD S L   |                                                         |
| 0.000083   | R | ARFEELNMDL K     |                                                         |
| 0.00000079 | R | IINEPTAAAIAY K   |                                                         |
| 0.0000036  | K | NQVAMNPVN R      | Oxidation (M) 0.000020000000000.0                       |
| 6.9E-09    | K | ATAGDTHLGG M     |                                                         |
| 0.00088    | K | NAVVTVPAYF\ Q    |                                                         |
| 0.00011    | R | IINEPTAAAIAY A   |                                                         |
| 0.0000025  | K | VQQLLQDFFN S     |                                                         |
| 9.5E-13    | K | SINPDEAVAY\ C V  |                                                         |
| 2.5E-09    | K | EQVFSTYSDN\ C A  |                                                         |
| 0.002      | R | TLSSSTAQT TIEI A |                                                         |
| 0.000077   | K | VQDLLLDVTF N     | emPAI                                                   |
| 0.0021     | K | NMMCAADPR H      |                                                         |
| 0.0000028  | K | LAVNLIPFPR L     |                                                         |



|            |   |                  |                                                |       |
|------------|---|------------------|------------------------------------------------|-------|
| 0.000012   | K | LAEEGKLDPV\Q     |                                                |       |
| 0.000073   | R | VLENLGADPSIT     |                                                |       |
| 0.000011   | R | VVDEGYNPSY\ P    |                                                |       |
| 0.000042   | R | GSGFVAVEIPF A    |                                                |       |
| 0.000022   | K | MPTLEEGTN L      |                                                |       |
| 0.000037   | K | ALAAYYFGSEE L    |                                                |       |
| 0.0032     | K | AHPDVFNMML       |                                                |       |
| 0.0000022  | R | QLGHNYIGSE\ E    |                                                |       |
| 1.8E-10    | K | LIGSPPGYVGY R    |                                                |       |
| 0.000035   | R | TVDFKNTLLIM G    |                                                |       |
| 5.7E-09    | R | LGHNFGTEQ V      |                                                |       |
| 0.000058   | R | RLGHNFVGT E V    |                                                |       |
| 0.0029     | R | QSDEIILFIDEV G   |                                                | emPAI |
| 0.00052    | K | VTVMDTLSR L      |                                                |       |
| 0.0005     | R | TCNYLTSAR Y      |                                                |       |
| 0.0006     | K | QNLELYVER V      |                                                |       |
| 0.0017     | R | VQDPNPELQKA      |                                                |       |
| 0.00009    | R | MLQYGEQNIR R     | Oxidation (M) 0.2000000000.0                   |       |
| 0.00003    | R | NLAGEIAQEYTR     |                                                |       |
| 9.9E-10    | R | FLPLGLGLLYL\ C Q |                                                |       |
| 0.0000039  | R | VGQAVDVVGI T     |                                                |       |
| 0.0000031  | R | AVPLALGLLCI\ V   |                                                |       |
| 6.3E-12    | K | TITGFQTHSTP A    |                                                |       |
| 0.00000055 | K | YLSDILSVLALT E   |                                                |       |
| 3.3E-09    | R | QNLAATFVNA L     |                                                |       |
| 0.000015   | K | YLSDILSVLALT F   |                                                |       |
| 0.0033     | R | QSEEASIDDLN H    |                                                |       |
| 0.00026    | R | FLPLGLGLLYL\ C T |                                                | emPAI |
| 0.0016     | R | QTVAVGVIK S      |                                                |       |
| 0.0087     | K | EVSSYLKK V       |                                                |       |
| 0.00000042 | K | IGGIGTVPVGR V    |                                                |       |
| 0.0023     | K | STTTGHLIYK L     |                                                |       |
| 0.00000086 | R | EHALLAFTLG V Q   |                                                |       |
| 0.000046   | K | YYCTVIDAPG\ D    |                                                |       |
| 0.000033   | R | YDEIIEVSSYL K    |                                                |       |
| 0.000058   | K | FHINIVVIGHV\ S   |                                                |       |
| 0.00000018 | K | MTPTKPMVVI F     | Oxidation (M) 0.20000000000000000000.0         |       |
| 0.000004   | R | VETGMIKPGIV S    | Oxidation (M) 0.000020000000000000000000.0     |       |
| 0.000028   | K | NMITGTSQAD D     | Oxidation (M) 0.0200000000000000000000000000.0 | emPAI |
| 0.00000067 | K | DAGVIAGLNV I     |                                                |       |
| 0.000097   | R | VEIANDQGN\ F T   |                                                |       |
| 0.0006     | R | MVNHVFQEF\ R     |                                                |       |
| 0.000092   | K | NALENYAYNV N     |                                                |       |
| 0.000003   | R | TTPSYVAFTDS L    |                                                |       |
| 0.00000079 | R | IINEPTAAAIAY K   |                                                |       |
| 0.0000036  | K | NQVAMNPVN R      | Oxidation (M) 0.0000200000000000.0             |       |
| 6.9E-09    | K | ATAGDTHLGG M     |                                                |       |
| 0.00088    | K | NAVVTVPAYF\ Q    |                                                |       |
| 0.00011    | R | IINEPTAAAIAY A   |                                                |       |
| 0.00000025 | K | VQQLLQDFFN S     |                                                |       |
| 5.9E-12    | K | SINPDEAVAY\ C V  |                                                |       |
| 0.0036     | K | KVEDSIEEAIQ\ M   | 3 Methyl (DE) 0.0000000100000100000010000000.0 | emPAI |
| 0.00083    | K | TDGLFLK C        |                                                |       |
| 0.0045     | R | SLNLTLR K        |                                                |       |
| 0.0084     | R | SLNLTLRK E       |                                                |       |
| 0.0000028  | R | VAEYAFLYAK T     |                                                |       |
| 0.0006     | R | YDDVDLITIR E     |                                                |       |
| 0.0000045  | K | TRYDDVDLITII E   |                                                |       |

|               |                |                                       |       |
|---------------|----------------|---------------------------------------|-------|
| 5.3E-11 R     | TADLGGSSTTTA   |                                       |       |
| 0.0000041 R   | TQSFLTWESLER   |                                       |       |
| 1.7E-12 K     | NLANPTALLLS H  | Oxidation (M) 0.0000000000002000.0    |       |
| 0.00000009 R  | ENTEGEYSGLE G  |                                       |       |
| 0.00041 K     | ELNLYANVRPCT   |                                       | emPAI |
| 0.000097 R    | VEIANDQGNIT    |                                       |       |
| 0.000006 K    | DAGVISGLNVI I  |                                       |       |
| 0.0006 R      | MVNHVQEFIR     |                                       |       |
| 0.0025 R      | FEELNMDLFR K   |                                       |       |
| 0.0000092 K   | NALENYAYNV N   |                                       |       |
| 0.0000017 K   | SSVHDVVLVG I   |                                       |       |
| 0.0000003 R   | TTPSYVAFTDS L  |                                       |       |
| 0.000083 R    | ARFEELNMDL K   |                                       |       |
| 0.00046 K     | QFSAEISSMV M   |                                       |       |
| 0.00000079 R  | IINEPTAAAIAY K |                                       |       |
| 0.000023 K    | NQVAMNPTN R    | Oxidation (M) 0.00002000000000.0      |       |
| 6.9E-09 K     | ATAGDTHLGG M   |                                       |       |
| 0.00088 K     | NAVVTVPAYFI Q  |                                       |       |
| 0.00011 R     | IINEPTAAAIAY A |                                       |       |
| 0.00000025 K  | VQQLLQDFFN S   |                                       |       |
| 5.9E-12 K     | SINPDEAVAYCV   |                                       |       |
| 0.000048 K    | TSLILALGK Y    |                                       |       |
| 0.0011 R      | LIGVLEGVR G    |                                       |       |
| 0.00031 K     | LALETFSVR C    |                                       |       |
| 0.00012 R     | EGYYILAER L    |                                       |       |
| 0.000027 R    | DVLLSQFSPVF E  |                                       |       |
| 0.000000018 K | SLFESLNSVGV R  |                                       |       |
| 0.00017 R     | VFACQNPSTQ K   |                                       |       |
| 0.000065 R    | TVGSTHLDSCCT   |                                       |       |
| 0.00084 K     | LLAENLNCLLD    |                                       |       |
| 1.2E-09 K     | TATVAQILEND    |                                       |       |
| 0.000042 R    | SLLSFIEIPIACA  |                                       |       |
| 0.0027 R      | FTEIWVPPITD S  |                                       |       |
| 0.0008 R      | ALHFNTSLLGS A  |                                       |       |
| 2.1E-09 K     | QLFDNITAMLIT   | Oxidation (M) 0.000000002000000000.0  |       |
| 7.1E-10 K     | ALYDGFSMFFI I  | Oxidation (M) 0.0000000200000000000.0 |       |
| 0.0024 R      | SYQQWLVESN F   |                                       | emPAI |
| 0.000007 R    | VLPLIIPILSK G  |                                       |       |
| 0.0016 R      | TALCDSALEVR E  |                                       |       |
| 0.0000082 K   | DLPVMTFLIS A   |                                       |       |
| 0.0000055 R   | AVSTCLSPVLQ    |                                       |       |
| 0.000000013 R | SQLLSFMDQLIT   |                                       |       |
| 1.4E-10 K     | SGPLPVDTFI I   |                                       |       |
| 6.1E-11 R     | NPDTISQISDLIT  |                                       |       |
| 0.000000037 K | VVIDVLSIVSAR   |                                       |       |
| 0.0000011 R   | IICRNPDITISQIT |                                       |       |
| 0.000035 R    | HALDTLLQTTFG   |                                       | emPAI |
| 0.0057 K      | GVLLYGPPGTCT   |                                       |       |
| 0.0000022 K   | LAEGFNGADLIN   |                                       |       |
| 0.0000055 K   | HGEIDYEAIVK L  |                                       |       |
| 0.00002 R     | AIASNIDANFLIV  |                                       |       |
| 0.000027 R    | NICTEAGMFA A   |                                       |       |
| 0.000000013 R | VVLDMTTLTIM A  |                                       |       |
| 0.00032 K     | VVSSAIIDKYIG L |                                       |       |
| 0.0000032 R   | ESIELPLMNPE V  |                                       |       |
| 0.000000029 R | TLMELLNQLDIV   | Oxidation (M) 0.0020000000000000.0    |       |
| 0.0000076 K   | SLQSVGQIIGEL   |                                       |       |
| 0.0000012 R   | EVDPPVYNMIE    |                                       |       |

|            |   |              |                                                      |
|------------|---|--------------|------------------------------------------------------|
| 0.000016   | K | VPLILGIWGGK  |                                                      |
| 0.0011     | K | SFQCELVMAK   | Oxidation (M) 0.000000200.0                          |
| 2.6E-09    | R | GLAYDTSDDQ   |                                                      |
| 0.00012    | K | MCCLFINDLD   | Oxidation (M) 0.20000000000000.0                     |
| 0.000057   | R | EGPPVFEQPEI  |                                                      |
| 1.8E-13    | R | VPIICTGNDFS  |                                                      |
| 0.0000099  | K | NFLTLPNIKVP  |                                                      |
| 1.1E-14    | R | VQLAETYLSQ   |                                                      |
| 0.00008    | R | AMAAVLLR     |                                                      |
| 0.00064    | R | DDAYLWPR     |                                                      |
| 0.0011     | R | LSLSTQSSLK   |                                                      |
| 0.0000056  | R | SSAESLFNLAK  |                                                      |
| 0.00045    | R | LNVVIQLPNAF  |                                                      |
| 0.0000009  | R | IAICIFDDVAEC |                                                      |
| 0.000038   | R | VLPALAAAME   |                                                      |
| 0.0000031  | K | ASFLPFFDELS  | Oxidation (M) 0.0000000000000002000.0                |
| 5.1E-11    | R | QLVDIVGSM    |                                                      |
| 0.0053     | R | WAAINAIGQL   |                                                      |
| 0.0035     | R | DSIDSSQVLP   |                                                      |
| 0.003      | R | TLTESLNNGN   |                                                      |
| 0.0000076  | R | VQAHAASAVL   | emPAI                                                |
| 0.00038    | R | ILQIHSR      |                                                      |
| 0.0057     | K | GVLLYGPPGT   |                                                      |
| 0.000029   | K | RFDSEVSGDR   |                                                      |
| 0.00000025 | R | STDDFNGAQL   |                                                      |
| 0.001      | R | ACAAQTNATF   |                                                      |
| 0.0000063  | K | LAGPQLVQMI   |                                                      |
| 4.3E-14    | R | TMLELLNQLD   | Methyl (DE) 0.0000000000000010.0                     |
| 0.00047    | R | DATEVNHEDF   |                                                      |
| 0.000046   | K | QLPYLVGNIVE  | 2 Methyl (DE) 0.000000000000020011000000000000 emPAI |
| 0.0000056  | K | VQEIVSEIFGK  |                                                      |
| 0.00026    | R | SSGGLSDDEIN  |                                                      |
| 0.0000043  | R | NSADTTIYSVE  |                                                      |
| 0.0002     | K | FSPSQIGANVL  |                                                      |
| 0.00000021 | K | EVDEVLLVGGI  |                                                      |
| 0.00093    | R | QAVTNPTNTI   |                                                      |
| 1.3E-11    | K | IPAEIASEIETA |                                                      |
| 0.00013    | K | GVNPDEAVANG  |                                                      |
| 0.0001     | R | EKIPAEIASEIE |                                                      |
| 0.0000062  | R | GDKVLLLLLD   |                                                      |
| 0.000021   | K | ATNGDTFLGG   | emPAI                                                |
| 0.0045     | R | SLNLTLR      |                                                      |
| 0.0084     | R | SLNLTLRK     |                                                      |
| 0.0000028  | R | VAEYAFLYAK   |                                                      |
| 0.0006     | R | YDDVDLITIR   |                                                      |
| 0.0000045  | K | TRYDDVDLITIE |                                                      |
| 5.3E-11    | R | TADLGGSSTTIA | Methyl (DE) 0.00000000001000.0                       |
| 1.1E-09    | R | TNSFLTWDNL   |                                                      |
| 0.0000017  | K | ATLFPGDGIGF  |                                                      |
| 0.0000002  | K | QAEQIHSAIIN  |                                                      |
| 0.00041    | K | ELNLYANVRP   |                                                      |
| 0.0081     | K | QVFTAADVVI   | emPAI                                                |
| 0.00000053 | R | TGGGGLDLSSIR |                                                      |
| 0.000014   | R | ELLAQGVSSQSI |                                                      |
| 0.0018     | R | LQSLAFQLTEK  |                                                      |
| 0.000063   | R | TMAQLGLCAF   | Oxidation (M) 0.0200000000.0                         |
| 0.0000046  | R | AMMDILVSLIN  |                                                      |
| 0.00082    | R | VRELLAQGVSY  |                                                      |

|               |                 |                                            |       |
|---------------|-----------------|--------------------------------------------|-------|
| 0.00019 R     | FELVDQLTHLT I   |                                            |       |
| 0.00000077 K  | AFEVLSLEVV L    |                                            |       |
| 1.7E-10 K     | CVLNMLTILDI Y   |                                            |       |
| 0.00000022 R  | LRDEPMFLAL M    | Oxidation (M) 0.0000020000000000000.0      | emPAI |
| 0.000031 R    | SGFGSFGMR S     | Oxidation (M) 0.000000020.0                |       |
| 0.0025 K      | AVLEPAMEGR D    |                                            |       |
| 0.001 K       | TLAFGIPIIDK I   |                                            |       |
| 0.00001 R     | GSASMFEGIG S    |                                            |       |
| 0.00017 R     | GRNPLCLVLA F E  |                                            |       |
| 0.0000023 K   | CEALHGDISQS E   |                                            |       |
| 0.000078 K    | TLAFGIPIIDKII Y |                                            |       |
| 1.5E-09 K     | LADGITTYSIIA A  |                                            |       |
| 0.000028 R    | TLAGFRDGHFI G   |                                            |       |
| 0.0000097 R   | ESAPSLDTICLY Q  | Oxidation (M) 0.00000000000000000000.0     |       |
| 0.0000013 R   | RVGDSSEVGG A    |                                            |       |
| 0.003 R       | GLDVPNVDLII T   |                                            | emPAI |
| 0.0014 R      | IGINGFGR I      |                                            |       |
| 0.000054 R    | VVDLIVHMSK A    |                                            |       |
| 0.0013 K      | AGIALSDKFVK L   |                                            |       |
| 0.0048 R      | AASFNIIPSSTG A  |                                            |       |
| 7.2E-11 R     | VPTVDVSVVD L    |                                            |       |
| 0.000021 K    | TLLFGEKPVTV N   |                                            |       |
| 0.00000065 K  | LVSWYDNEW V     |                                            |       |
| 5.7E-10 R     | FGIVEGLMTT T    |                                            |       |
| 6.1E-10 K     | GILGYTEDDV S    |                                            |       |
| 0.0000012 K   | VINDRFGIVEG T   |                                            | emPAI |
| 0.000032 K    | EIEDAVADLR S    |                                            |       |
| 0.0002 K      | VQSIVAEIFGK S   |                                            |       |
| 0.0000014 R   | SSGGLSEDDIQ M   |                                            |       |
| 0.00015 R     | QAVTNPTNTV R    |                                            |       |
| 0.000000021 K | EVDEVLLVGGIV    |                                            |       |
| 0.000000002 K | SQVFSTAADN V    |                                            |       |
| 0.00021 K     | IPSEIAKEIEDA S  |                                            |       |
| 0.00013 K     | GVNPDEAVANG     |                                            |       |
| 0.00000001 K  | ELLLLDVTPLSL L  |                                            |       |
| 0.0016 K      | LIVWAPTR E      |                                            |       |
| 0.0041 K      | LILDVEDFK N     |                                            |       |
| 0.000042 R    | VANEIGFPVM A    |                                            |       |
| 0.000025 K    | LLEEAPSPALT K   |                                            |       |
| 0.00000031 R  | DHGINFIGPNF V   |                                            |       |
| 1.1E-09 K     | SEAAAAFGND F    |                                            |       |
| 0.001 R       | ALNDTIITGVP L   |                                            |       |
| 0.000000053 K | NAGVPTVPGS V    |                                            |       |
| 0.00000042 R  | HIEFQVLADKF D   |                                            |       |
| 0.0000048 R   | IQVEHPVTEM V    | Oxidation (M) 0.0000000002000000000000.0   |       |
| 0.000003 K    | LADEAVCIGEA G   |                                            | emPAI |
| 0.0024 R      | FFAFGR V        |                                            |       |
| 0.000011 R    | LWGENFFDPA K    |                                            |       |
| 4.7E-13 R     | PMEEGLAEAI I    |                                            |       |
| 0.0000045 K   | AYLPVVESFGF A   |                                            |       |
| 0.00027 K     | NATLTNEKEVI A   |                                            |       |
| 3.8E-10 K     | STLTDSLVAAM M   |                                            |       |
| 0.0000043 R   | YRVENLYEGPI N   |                                            |       |
| 2.4E-09 R     | DGNEYLINLID I   |                                            |       |
| 0.009 R       | VMQTWLPAS Y     | Oxidation (M) 0.020000000000000000000000.0 | emPAI |
| 0.00028 R     | GINDTYFGR L     |                                            |       |
| 0.0000018 R   | FMVQNVVDLIA     |                                            |       |
| 0.0000039 K   | SLLEEFYSIR L    |                                            |       |

|             |   |               |   |                                  |
|-------------|---|---------------|---|----------------------------------|
| 0.0048      | K | KINEIHSEAER   | N |                                  |
| 0.000044    | K | STWQGSPTFA    |   |                                  |
| 2.7E-10     | R | VLLNNCQEAFI   | L |                                  |
| 2.7E-10     | K | APNSFGFLGEV   |   |                                  |
| 8.5E-11     | R | SQPQPQA       | K | emPAI                            |
| 0.00000045  | K | SLGLSDNVSIA   | D |                                  |
| 0.0035      | R | MVNGLVDEDI    | V |                                  |
| 2.4E-09     | R | AGQYGTVTSL    | D |                                  |
| 0.0066      | K | HMFQDAVW      | N |                                  |
| 3.3E-15     | R | TMVFANTVEA    | A |                                  |
| 0.000014    | R | GVDVPNVSHV    | I | emPAI                            |
| 0.0027      | R | VVGSELIQK     | Y |                                  |
| 0.0059      | K | KFEPAAPPAR    | V |                                  |
| 0.000045    | K | AVANSTSATFL   | V |                                  |
| 0.0016      | K | AICTEAGLLALIE |   |                                  |
| 0.0044      | R | IESLDPALLRPI  |   |                                  |
| 1.6E-11     | R | TMLELLNQLD    | G |                                  |
| 6.6E-11     | K | APLESYADIGGE  |   |                                  |
| 0.00000026  | K | VLSVVGILQDEV  |   |                                  |
| 1.5E-10     | R | VADDLSPSIVF   | R | emPAI                            |
| 0.0019      | R | NVVLDEFGSPIV  |   |                                  |
| 0.00000008  | K | VGAATETELEI   | K |                                  |
| 0.000063    | R | GYISQFVTNPL   |   |                                  |
| 6.3E-14     | K | TNDSAGDGTT    | E |                                  |
| 6.4E-11     | R | AIELPNAMEN    | E |                                  |
| 0.00026     | R | AALQAGIDKL    | G |                                  |
| 0.000000028 | R | APLLIIAEDVTC  | L |                                  |
| 0.00063     | R | APLLIIAEDVTC  | G |                                  |
| 0.00033     | K | TTQLRAPLLIIA  | L | emPAI                            |
| 0.000012    | K | AGFAGDDAPRA   |   |                                  |
| 0.0000069   | R | HTGVMVGMCD    |   |                                  |
| 0.00038     | R | GYMFTTTAER    | E |                                  |
| 0.00025     | R | AVFPSIVGRPR   | H |                                  |
| 9.2E-09     | K | NYELPDGQVIF   |   |                                  |
| 8.9E-09     | K | LAYVALDYEQES  |   |                                  |
| 0.000085    | R | VAPEEHPVLLTA  |   |                                  |
| 6.9E-09     | R | TTGIVLDSGDC   | L |                                  |
| 0.0058      | K | YDVHGEMSR     | V |                                  |
| 0.000009    | R | HENVDIVVIR    | E |                                  |
| 0.0002      | R | HLQFPSFADR    | L |                                  |
| 0.00000093  | K | LADGLFLESCRE  |   |                                  |
| 0.000041    | K | YAFEYAYLNNFK  |   |                                  |
| 7.4E-09     | K | TPVGGGVSSLIK  |   |                                  |
| 0.000000019 | K | ANPVALLSSAH   |   | Oxidation (M) 0.00000000002000.0 |
| 0.008       | R | TKDLGGTSTTC   | L | emPAI                            |
| 0.0017      | K | KPDVDIEK      | I |                                  |
| 0.0012      | K | LVSGLIPDAGT   | A |                                  |
| 0.000098    | K | IPLTLIYDDIK   | S |                                  |
| 0.00000019  | K | DFGSALWDM     | G |                                  |
| 0.0049      | K | GNIDVDTPFG    | L | Oxidation (M) 0.000000000020.0   |
| 0.00000016  | R | VVHQEGDVEIS   |   |                                  |
| 0.000004    | K | FSLEETVAILHL  |   |                                  |
| 0.0000013   | R | IKVDLIVDVPV   | L |                                  |
| 0.0000036   | K | STYNDINPGMI   |   |                                  |
| 0.0025      | K | AVLEPAMEGRD   |   |                                  |
| 0.0000028   | R | GSASMFEGVCS   |   | Oxidation (M) 0.000020000000.0   |
| 0.001       | K | TLAFGIPIIDK   | I |                                  |
| 0.00035     | R | FNELPSIAVER   | G |                                  |

|             |   |                 |               |                           |
|-------------|---|-----------------|---------------|---------------------------|
| 0.000019    | K | CEALHGDISQ/ E   |               |                           |
| 0.0052      | K | KGSAILIHGQD A   | Methyl (DE)   | 0.00000000001000.0        |
| 0.000078    | K | TLAFGIPIIDKII F |               |                           |
| 1.1E-10     | R | SSGFSGFSGGCS    |               |                           |
| 0.000032    | K | LADGITMYSIA A   |               |                           |
| 0.000052    | R | TLAGFRDGNF: G   |               |                           |
| 0.00000097  | R | ESAPSLDTICLY E  | Oxidation (M) | 0.000000000000000000020.0 |
| 0.00042     | K | LAIVNVGR Q      |               | emPAI                     |
| 0.0000052   | R | AVAVVVDPIQ G    |               |                           |
| 0.0012      | K | AVQEEDELSPE L   |               |                           |
| 0.000000072 | R | SINPQTIMLGC Q   | Oxidation (M) | 0.00000002000000.0        |
| 7.7E-10     | K | TNEQTVQEMI Y    |               |                           |
| 0.000074    | R | AGVPMEVMG V     |               |                           |
| 0.00000021  | R | IFGAGGGLGH. M   |               |                           |
| 0.00019     | R | SGAVASAVMk K    |               |                           |
| 0.0035      | K | ISWVDPK T       |               |                           |
| 0.0052      | R | SGAVASAVMk K    |               |                           |
| 6.1E-09     | R | GYAATAAQGS S    |               |                           |
| 6.5E-11     | K | TGYRPE TGSMA    | Methyl (DE)   | 0.000000100000000000.0    |
| 0.000091    | K | LINSTSEEIR S    |               |                           |
| 0.00024     | K | VSSYLVDVLP F    |               |                           |
| 1.5E-10     | K | SGFEATLIGLI L   |               |                           |
| 6.2E-10     | R | TNALNSAVLGI G   |               |                           |
| 7E-14       | K | VSSDFVDAALI C   |               |                           |
| 0.0033      | K | HLPHLWDLCL S    |               | emPAI                     |
| 0.0057      | K | GVLLYGPPGT( T   |               |                           |
| 0.00028     | K | AVCTEAGMFA E    |               |                           |
| 0.00011     | R | IDILDQALLRP( I  |               |                           |
| 3.7E-11     | R | TMLELLNQLD( I   |               |                           |
| 8.2E-10     | R | EHAPSIIFMDE M   |               |                           |
| 0.000085    | R | ILLDDGTSNIL( S  | Oxidation (M) | 0.0000000000020.0         |
| 9E-11       | R | LSGLVNNLISIC E  |               |                           |
| 1.3E-11     | R | LASFQNAPSVI( Q  |               |                           |
| 0.00000032  | K | TDAASAFLASL K   |               | emPAI                     |
| 0.00093     | R | FMDNLFLR N      |               |                           |
| 0.00081     | R | NPASVAQFLR S    |               |                           |
| 6.7E-09     | R | GGLVSILNLGL R   |               |                           |
| 0.0009      | K | GSSLQCLVNVIS    |               |                           |
| 0.00000003  | R | NCALEVLFDLL G   |               |                           |
| 2.8E-09     | K | VVTQAAPSSIV T   |               |                           |
| 0.0022      | R | ILSLELLQGML N   |               |                           |
| 0.0034      | K | TTSGLADDASI L   |               |                           |
| 0.000088    | K | LPSESVVEFFT/ Q  |               |                           |
| 0.0083      | R | AELTNFTFQNI N   |               | emPAI                     |
| 0.00033     | K | SSLDAFK Q       |               |                           |
| 0.0035      | K | LQLIVFGK K      |               |                           |
| 0.00061     | R | AVAGAGVLSG L    |               |                           |
| 0.000059    | R | QFDGLVDVYR K    |               |                           |
| 0.000043    | K | LLIQNQDEMI( A   | Oxidation (M) | 0.00000000200.0           |
| 0.0053      | R | TIKDEGFGSLM G   |               |                           |
| 0.00000011  | K | GFTNFALDFLN T   |               |                           |
| 0.000094    | R | AVAGAGVLSG K    |               | emPAI                     |
| 0.0072      | K | ASTFNDSL R S    |               |                           |
| 0.00002     | R | EAGSGAPSLLE A   |               |                           |
| 0.000000013 | R | LEGASEESLLS( V  |               |                           |
| 3.6E-09     | K | STGGWGWGF A     |               |                           |
| 6.8E-12     | K | VFDDSVESFTS G   |               |                           |
| 0.00029     | R | GKAETMAGY\ G    |               | emPAI                     |

|               |                           |                                                         |
|---------------|---------------------------|---------------------------------------------------------|
| 4.5E-10 K     | AADQGLVILQ <sup>+</sup> R |                                                         |
| 0.00000054 K  | AADQGLVILQ <sup>+</sup> S |                                                         |
| 0.000000002 R | EDGEVPGYND K              |                                                         |
| 6.3E-12 K     | SSEVEALISEITL L           | emPAI                                                   |
| 0.000000057 K | VGEEVEILGLR E             |                                                         |
| 8.3E-10 R     | GSALSALQGTI Q             |                                                         |
| 0.000032 K    | LMDAVDEYIPI V             |                                                         |
| 5.1E-10 K     | ILDNGQAGDNG               |                                                         |
| 0.000026 R    | HYAHVDCPGI N              |                                                         |
| 0.000067 K    | DAGVIAGLNV I              |                                                         |
| 0.0071 R      | NALETYVYNM N              |                                                         |
| 0.0000016 R   | ITPSWVGFTD <sup>+</sup> L |                                                         |
| 0.0022 K      | NGHVEIAND( I              |                                                         |
| 0.000000079 R | IINEPTAAAIAY K            |                                                         |
| 0.00011 R     | IINEPTAAAIAY G            |                                                         |
| 2.3E-09 R     | VEIESLFDGVD A             |                                                         |
| 0.0005 R      | FVEFLTR E                 |                                                         |
| 0.0087 R      | YKVAVDAEEG R              |                                                         |
| 0.000026 R    | SLQLEATTQFR K             |                                                         |
| 0.0041 R      | NATWTLSNFC G              |                                                         |
| 0.00000013 R  | SPPIEEVIDAG\ F            |                                                         |
| 6.4E-09 R     | IITVCLEGLENI V            |                                                         |
| 0.00000024 R  | EQAVWALGN' C              |                                                         |
| 0.00002 R     | LVELLQHQP <sup>+</sup> S  |                                                         |
| 0.0016 R      | CRDLVLGQGA L              |                                                         |
| 0.0042 K      | VVIEHGAVPIF C             | emPAI                                                   |
| 0.0055 R      | SGAYIVR Q                 |                                                         |
| 0.0018 K      | SIVASGLAR R               |                                                         |
| 0.00025 K     | TAAYGHFGR D               |                                                         |
| 0.00001 K     | ANVDYEQIVR K              |                                                         |
| 0.00000022 R  | FVIGGPHGDA K              |                                                         |
| 1.3E-10 K     | TNMVMVFGE A               |                                                         |
| 5E-10 R       | EIGFVSADVGL V             |                                                         |
| 0.0034 K      | VLVNIEQQSP <sup>+</sup> K |                                                         |
| 0.0025 K      | FSLGLAEPK L               |                                                         |
| 0.002 R       | SFLELNLPK V               |                                                         |
| 0.0016 K      | SQLGLAHSYSF A             |                                                         |
| 0.000004 K    | IVNDNYLYAR V              |                                                         |
| 0.0000013 K   | CPSTLQILGAI A             |                                                         |
| 9.2E-10 K     | IPCQSNEFVLE G             |                                                         |
| 0.000032 K    | MSDIAPNLAA L              |                                                         |
| 0.0000034 R   | VVQLTAFHPFI S             | Oxidation (M) 0.000000000000000000000000000020000 emPAI |
| 0.0087 R      | YKVAVDAEEG R              |                                                         |
| 0.0041 R      | NATWTLSNFC G              |                                                         |
| 1.7E-10 R     | SPPIEEVISAG\ F            |                                                         |
| 6.4E-09 R     | IITVCLEGLENI V            |                                                         |
| 0.00000024 R  | EQAVWALGN' C              |                                                         |
| 0.0000046 K   | LVELLLHHSPS' T            |                                                         |
| 0.0019 R      | CRDLVLGCGA L              | emPAI                                                   |
| 0.00039 K     | APGILER K                 |                                                         |
| 0.0017 K      | AVDSLVPIGR G              |                                                         |
| 0.0000034 R   | AAELTNLFESR I             |                                                         |
| 0.0000041 K   | TTIAIDTILNQK Q            |                                                         |
| 0.002 R       | IRNFYANFQVI V             |                                                         |
| 2.9E-13 R     | EVAafaqfGSI G             |                                                         |
| 0.00055 R     | VLATDEWLR V               |                                                         |
| 0.00091 R     | HSVIDCFER A               |                                                         |
| 0.000000079 K | SANGEDTQVM F              |                                                         |

|            |   |               |                                              |       |
|------------|---|---------------|----------------------------------------------|-------|
| 0.00000046 | K | NLPATAQVAS    |                                              |       |
| 4.5E-10    | R | VEGCDGVYAL    |                                              |       |
| 0.000016   | R | NFFLFTPLLPS   |                                              | emPAI |
| 0.000012   | K | AGFAGDDAPFA   |                                              |       |
| 0.0056     | R | GYSFTTTAER    |                                              |       |
| 0.0000069  | R | HTGVMVGMCD    |                                              |       |
| 0.00025    | R | AVFPSIVGRPR   |                                              |       |
| 0.0000097  | K | NYELPDGQVIF   |                                              |       |
| 6.9E-09    | R | TTGIVLDSGDC   |                                              |       |
| 0.0021     | R | FELLAR        |                                              |       |
| 0.00034    | R | TDACFIR       |                                              |       |
| 0.0002     | R | SVCTEAGMYA    |                                              |       |
| 0.00000099 | R | FDDGVGGDNIT   |                                              |       |
| 3.7E-11    | R | TMLEIVNQLD    | Oxidation (M) 0.020000000000000.0            | emPAI |
| 0.00019    | R | GTGGSAVFIAFN  |                                              |       |
| 0.0011     | R | GWSESSPNV     |                                              |       |
| 0.000063   | R | LVLGELQTPFVY  |                                              |       |
| 0.00027    | R | AFSSSPVVPLA   |                                              |       |
| 0.0000041  | R | SLLDTNPTIES   |                                              |       |
| 0.0000025  | R | GPPALVDFFSCL  |                                              |       |
| 5.8E-10    | K | SSLAAEQAAA    | Oxidation (M) 0.000000000000000020.0         |       |
| 0.00079    | K | ILENAGHLPLA   |                                              | emPAI |
| 0.005      | R | SISCWTLR      |                                              |       |
| 0.0032     | K | YLIQESGNPK    |                                              |       |
| 0.0000042  | K | ALVENSAITLG   |                                              |       |
| 0.0000076  | R | QSAFALMGDLV   |                                              |       |
| 0.0028     | R | LLQFFQSPHAS   |                                              |       |
| 0.0038     | K | VVSSLGLILQH   |                                              |       |
| 6.1E-10    | R | LLDFLEIASQQE  |                                              |       |
| 0.00079    | K | CSAAIDVLSNN   | Oxidation (M) 0.00000000000000000000200000.0 |       |
| 0.008      | K | ICEDIPHVLDTIL |                                              | emPAI |
| 0.00032    | K | VVSAMVNND     | Oxidation (M) 0.00002000000.0                |       |
| 0.0000081  | K | IPGVISASSFDC  |                                              |       |
| 0.00076    | K | IGIYNIEGCSR   |                                              |       |
| 0.00000053 | R | LFNETSEALGGA  |                                              |       |
| 0.0023     | R | DLPLVGEIPSSF  |                                              |       |
| 6.6E-09    | K | VLDSGGLSPELD  |                                              |       |
| 0.00000072 | K | GTSSILSEVFLH  |                                              | emPAI |
| 0.00000054 | R | IVNDGVTVAR    |                                              |       |
| 0.0000018  | K | LADLVGVTLGIG  |                                              |       |
| 0.0000003  | R | DLVGVLEDAIRG  |                                              |       |
| 0.0000055  | K | VVAAGANPVLG   |                                              |       |
| 0.00000005 | K | AAVEEGIVVGC   |                                              |       |
| 0.000069   | R | GGYPILIIAEDII |                                              | emPAI |
| 0.000009   | R | HENVDIVVIR    |                                              |       |
| 0.0002     | R | HLQFPSFADR    |                                              |       |
| 0.000041   | K | YAFEYAYLNNFK  |                                              |       |
| 0.00000018 | K | TPVGGGVSSLIK  |                                              |       |
| 0.0000027  | K | ELDLFASLVNCH  |                                              |       |
| 0.00000001 | R | TEDLGGNSTT    |                                              | emPAI |
| 0.0048     | R | VDMLMVER      |                                              |       |
| 0.0047     | K | LEGLTGEGQR    |                                              |       |
| 0.00000007 | K | LLEIDPNGAVSK  | 2 Oxidation (M) 0.0000000000000000220.0      |       |
| 0.00000021 | R | LEVYTADDYAI   |                                              |       |
| 0.000015   | R | TVQHLLIGSGMA  |                                              |       |
| 0.00084    | K | SSGNDASIALRN  |                                              |       |
| 0.000037   | K | IPSFEAVDDFLV  |                                              |       |
| 9.7E-10    | K | VIELSDVILEVL  |                                              |       |

|               |                 |                                   |       |
|---------------|-----------------|-----------------------------------|-------|
| 0.00000008 K  | VIELSDVILEVL C  |                                   | emPAI |
| 0.00041 R     | GNLPGAENLV F    |                                   |       |
| 0.000064 R    | ADDTTQFLEVIA    |                                   |       |
| 0.00000073 R  | EGLVSDAIESFIA   |                                   |       |
| 0.000033 R    | TANLANNQIIN C   |                                   |       |
| 0.0017 R      | GCFNELISLME A   |                                   |       |
| 0.00065 K     | QVGYPDYMIT      |                                   |       |
| 0.00000023 K  | FQSVPVQAGC G    |                                   | emPAI |
| 0.0016 K      | IGLFGGAGVGIT    |                                   |       |
| 0.0063 R      | TIAMDGTEGL' G   | Oxidation (M) 0.000200000000.0    |       |
| 0.0041 K      | VLNTGAPITVFA    |                                   |       |
| 0.00078 R     | VGLTGLTVAE\ D   |                                   |       |
| 6.8E-09 K     | TVLIMELINNV A   |                                   |       |
| 0.00000052 R  | FTQANSEVSAI I   |                                   |       |
| 0.0000026 R   | DAEQDVLLEF F    |                                   |       |
| 0.0011 R      | DAPALVDLAT\ G   |                                   | emPAI |
| 0.00016 K     | IMFALTSIK G     |                                   |       |
| 8.3E-11 R     | AGELSAAEIDN Q   |                                   |       |
| 0.0071 R      | VLNPNAEVLN S    |                                   |       |
| 0.00000001 R  | AQLGVEAFAN T    |                                   |       |
| 6.1E-10 R     | QLINSGPVIA\ A   |                                   |       |
| 0.000025 R    | TKLYEGLADQ\ K   |                                   | emPAI |
| 0.000012 K    | AGFAGDDAPR A    |                                   |       |
| 0.00038 R     | GYMFTTTAER E    |                                   |       |
| 9.2E-09 K     | NYELPDGQV\ F    |                                   |       |
| 0.0062 R      | IAPEEHPVLLTIA   |                                   |       |
| 0.00000034 R  | TTGIVLDSGDC L   |                                   | emPAI |
| 0.00004 R     | QAVDISPLR R     |                                   |       |
| 0.0039 K      | HATFVPHTAG Y    |                                   |       |
| 0.0000001 R   | VNQAIFLLTTG E   |                                   |       |
| 0.0017 R      | RVNQAIFLLTT E   |                                   |       |
| 7.1E-10 K     | TIAECLADELIN G  |                                   | emPAI |
| 0.00041 R     | GNLPGAENLV F    |                                   |       |
| 0.00000073 R  | EGLVSDAIESFIA   |                                   |       |
| 0.000033 R    | TANLANNQIIN C   |                                   |       |
| 0.0017 R      | GCFNELISLME A   |                                   |       |
| 0.000048 K    | QVGYPDYLFIT     |                                   |       |
| 0.00000023 K  | FQSVPVQAGC G    |                                   | emPAI |
| 0.0000031 R   | HLVFPFIFLQ\ Q   |                                   |       |
| 0.00081 K     | SLYHTEDAPQ\ R   | Oxidation (M) 0.000000000002000.0 |       |
| 1.6E-09 K     | SLEEEAAPLVS A   |                                   | emPAI |
| 0.00000054 R  | IVNDGVTVAR E    |                                   |       |
| 0.0000018 K   | LADLVGVTLG\ G   |                                   |       |
| 0.0000039 R   | DIISILED\ AIK G |                                   |       |
| 0.0000055 K   | VVAAGANPVL G    |                                   |       |
| 0.000000005 K | AAVEEGIVVGC L   |                                   | emPAI |
| 0.00053 K     | VLAALQESR R     |                                   |       |
| 0.000062 R    | ILEFIAVGR L     |                                   |       |
| 0.0042 K      | ESAQIAHTVAF K   |                                   |       |
| 0.000000054 R | LADFGAAICG\ H   |                                   |       |
| 3.6E-10 K     | DGPSAGCTMI K    |                                   |       |
| 0.0035 K      | LQLIVFGK K      |                                   |       |
| 0.0051 K      | SDGIAGLYR G     |                                   |       |
| 0.00024 K     | SSFDAFSQIVK K   |                                   |       |
| 0.000043 K    | LLIQNQDEML\ A   | Oxidation (M) 0.00000000200.0     |       |
| 0.0012 R      | TIRDEGIGSLW G   |                                   |       |
| 0.00000022 K  | GFTNFAIDFMIT    |                                   |       |
| 0.000053 R    | AVAGAGVLAC K    |                                   | emPAI |

|               |                 |                                     |       |
|---------------|-----------------|-------------------------------------|-------|
| 0.00000002 R  | VQIASLIGLLIR H  |                                     |       |
| 0.000042 R    | SFVNLIESLLIKI I |                                     |       |
| 0.0014 K      | NLFPSLLSIIEQI G |                                     |       |
| 0.0059 K      | TNAHLFPVVLIN    |                                     |       |
| 5.2E-12 R     | SASGWQVSNR K    |                                     | emPAI |
| 0.00047 K     | SNADALWAR I     |                                     |       |
| 0.0044 K      | ELAAIGPALAR S   |                                     |       |
| 0.000065 K    | TPSADYSVDR Q    |                                     |       |
| 0.0000079 K   | TVSSAITESFQI G  |                                     |       |
| 0.0000024 R   | NLDVSSVEEISIS   |                                     |       |
| 0.0021 R      | SSVESSVIPSFE A  |                                     |       |
| 0.00046 R     | DRDANIQDVN D    |                                     |       |
| 0.00017 R     | LQGEIQPLEY      |                                     |       |
| 0.00011 R     | AEEAFFNQVIAN    |                                     | emPAI |
| 0.0000065 R   | LVELANEFSS      |                                     |       |
| 0.000023 K    | TVAFLLPAIEAIS   |                                     |       |
| 0.000034 R    | QTFIFSATVPE Q   |                                     |       |
| 1.1E-10 K     | SLIEDEAELSDI T  |                                     |       |
| 0.0072 K      | VLVLDEADHLID    | Oxidation (M) 0.00000000000020000.0 | emPAI |
| 0.00063 K     | SLLTLGR V       |                                     |       |
| 0.0059 K      | QVTDVSSLVR S    |                                     |       |
| 0.00045 K     | SAPCGGLPAE/A    |                                     |       |
| 0.00000076 K  | SDTDKLIADLT R   |                                     |       |
| 0.00004 R     | GLEEEIVTSAN G   |                                     |       |
| 8.6E-09 K     | VTFLELYNEEITV   |                                     | emPAI |
| 0.00000067 R  | SSIFDANAGIG S   |                                     |       |
| 5.7E-10 R     | VPTSNVSVVDL     |                                     |       |
| 0.000000056 K | GILGYTDEDVLS    |                                     |       |
| 0.0069 K      | FLVLAPTR E      |                                     |       |
| 0.0036 R      | IIDLIEGR S      |                                     |       |
| 0.000026 K    | IFLIADDR I      |                                     |       |
| 0.0072 R      | GVDVVVGTPCI     |                                     |       |
| 0.00045 R     | SVTGFLSDLYR T   |                                     |       |
| 0.000000093 R | TILSDLITVYAK G  |                                     |       |
| 0.0015 R      | IQGAVFDLP EE    |                                     |       |
| 0.00012 K     | GTDALAAALAI S   |                                     |       |
| 0.0000059 R   | DVGCHFEFISPF    |                                     | emPAI |
| 0.0053 K      | VVDSLYVR S      |                                     |       |
| 0.00014 K     | IPGTTDLQITLCE   |                                     |       |
| 2.7E-12 R     | HLSSLYDTLLECL   |                                     |       |
| 0.000023 R    | VEIAHIAELIGL K  |                                     | emPAI |
| 0.00045 K     | AVLAVADLER R    |                                     |       |
| 0.00000094 R  | IAEGYEMASR V    |                                     |       |
| 7.5E-10 R     | WVGGVELELI/I    |                                     |       |
| 0.00000038 R  | SQDYEIGDGTIQ    |                                     | emPAI |
| 0.000000019 K | ILSAFVETEDVIE   |                                     |       |
| 0.0000011 K   | TSAADVLQLLTM    |                                     |       |
| 0.000000046 K | QELLAELYSTEIG   |                                     | emPAI |
| 0.0057 R      | GVLLYGPPGTCT    |                                     |       |
| 0.00041 K     | AVANHTTAAFV     |                                     |       |
| 0.0002 R      | ELLKPSASVALIH   |                                     |       |
| 5.5E-11 K     | ENAPAIIFIDEVF   |                                     |       |
| 0.0032 R      | QLEFTDIQEEYN    |                                     |       |
| 0.000088 R    | LAKENAPAIIFI F  |                                     | emPAI |
| 0.0096 R      | FNIFSGCPSGR T   |                                     |       |
| 2.1E-14 K     | SQDSEVGDGT E    |                                     |       |
| 0.000013 R    | VAAAAGGTVCQ     |                                     | emPAI |
| 0.0066 K      | NQQVSASALRH     |                                     |       |

|             |   |               |   |                                                |       |
|-------------|---|---------------|---|------------------------------------------------|-------|
| 0.000058    | K | SQIVQDELAR    | L |                                                |       |
| 3.7E-10     | R | IALVDTLASQIFS |   |                                                |       |
| 0.0000013   | K | SAVLNSLIGHP   | A |                                                | emPAI |
| 0.0012      | R | DLNEYVGFVK    | S |                                                |       |
| 0.00000073  | K | GVDGLFESFAL   |   |                                                |       |
| 0.0029      | K | IGDHLQSADA    | E |                                                |       |
| 0.000000022 | R | GLEVAVANLQ    | L |                                                |       |
| 0.0096      | K | AIFTCLLDQVS   | A |                                                |       |
| 0.00053     | R | GQSAPLSSAPF   | D |                                                | emPAI |
| 0.0047      | K | LLQLDEQSR     | A | Methyl (DE) 0.0000010000.0                     |       |
| 0.0000002   | K | MGYGSAAVEL    | Y | Oxidation (M) 0.2000000000000.0                |       |
| 0.000088    | K | LSQVELLVIDE   | S |                                                |       |
| 7.9E-11     | K | SLLGPYLVFLSS  | S |                                                | emPAI |
| 0.00015     | K | DMTALDIPVV    | D | Oxidation (M) 0.02000000000000000000.0         |       |
| 0.00000054  | K | AKDMTALDIP    | D | Oxidation (M) 0.0002000000000000000000.0       |       |
| 0.00018     | K | VSVTNPYSHSI   | E |                                                | emPAI |
| 0.00055     | R | LGYVGVVNR     | S |                                                |       |
| 0.0014      | K | SSVLEALVGR    | D |                                                |       |
| 0.00000015  | K | VPVGDQPSDII   | I |                                                |       |
| 0.000073    | K | SSVLEALVGRE   | G |                                                |       |
| 0.00084     | R | SALFVPDVPFER  | R |                                                | emPAI |
| 0.0023      | R | HAAAVNFK      | N |                                                |       |
| 0.00055     | R | LLQAFLOK      | A |                                                |       |
| 0.0021      | K | QFLVASVSR     | L |                                                |       |
| 0.00017     | K | GVWSALFTR     | V |                                                |       |
| 0.000000087 | R | IQSQLSEALTV   | H |                                                |       |
| 0.00000002  | R | ALSDAADQAN    | L |                                                | emPAI |
| 0.00043     | K | IAELLR        | Y |                                                |       |
| 0.00072     | K | ADLVNNLGTI    | S |                                                |       |
| 0.0007      | R | ELISNSSDALDI  | I |                                                |       |
| 0.0019      | K | HFSVEGQLEF    | A |                                                |       |
| 9.6E-10     | K | GIVDSEDLPLN   | E |                                                |       |
| 0.00011     | K | SGDELTSKDY    | M |                                                |       |
| 0.0018      | K | FYEILGVPK     | S |                                                |       |
| 0.00000027  | K | EGMGGGGGGC    | Q | Oxidation (M) 0.0020000000000000000000000000.0 |       |
| 0.000013    | R | KGEDLFVEHTLS  |   |                                                | emPAI |
| 0.0000014   | R | LQAQTEAVNL    | T |                                                |       |
| 7.6E-09     | K | TQSNPENTVG    | G |                                                | emPAI |
| 1.9E-10     | K | SQPDLAILAVN   | D |                                                |       |
| 0.0000023   | R | GIPFLIELTAIV  | C |                                                |       |
| 0.000001    | K | MAPPLVTLLS    | N | Oxidation (M) 0.20000000000000000000.0         | emPAI |
| 0.0000002   | R | LADTYGSGELF   | L |                                                |       |
| 0.000077    | R | LQADDMDDEL    | L | Oxidation (M) 0.00000200000.0                  |       |
| 0.0000081   | R | FGFNLLVGGFF   | R |                                                |       |
| 0.00000097  | R | VTELVPLVAEII  | E |                                                |       |
| 0.0032      | R | VTELVPLVAEII  | E |                                                | emPAI |
| 0.0000027   | K | TSSAVSLILR    | G |                                                |       |
| 0.000012    | R | DSYLLNGYALMA  |   |                                                |       |
| 0.0000059   | R | EQLAIAEFADAV  |   |                                                |       |
| 0.00000052  | R | TLESNTVVAG    | E |                                                | emPAI |
| 0.0074      | R | VVVDGNVITSIA  |   |                                                |       |
| 0.00000023  | K | LAATCATAVE    | S |                                                |       |
| 0.000000052 | K | LVAEVLLEDEV   | S |                                                |       |
| 0.0044      | K | SFDLIVLPGGLIF |   |                                                |       |
| 0.0000014   | K | TVLIPIAHGTE   | R |                                                | emPAI |
| 0.0014      | K | IVEAINVAAK    | D |                                                |       |
| 0.00011     | K | GLVLLSQSLK    | E |                                                |       |
| 0.000047    | K | SSVILASEAAK   | M |                                                |       |

|             |   |               |   |                                      |
|-------------|---|---------------|---|--------------------------------------|
| 0.000046    | R | AQGEAEAILAFA  |   |                                      |
| 0.00017     | R | AQILESEGER    | Q |                                      |
| 0.0083      | R | QSHINIADGKKS  |   |                                      |
| 0.0000017   | R | VAEQYITAFGME  |   | emPAI                                |
| 0.001       | R | ILGQPSLIR     | E |                                      |
| 0.000011    | R | SALNALLFR     | T |                                      |
| 0.000011    | R | IATEEQIQAQCE  |   |                                      |
| 3.9E-10     | K | GLLLFIDEADAN  |   | emPAI                                |
| 0.00019     | R | GTGGSAVFIAFN  |   |                                      |
| 0.0011      | R | GWSESSPNVS    |   |                                      |
| 0.000063    | R | LVLGELQTPFVY  |   |                                      |
| 0.0028      | R | LATELGDNPST   |   |                                      |
| 5.8E-10     | K | SSLAAEQAAACL  |   | Oxidation (M) 0.000000000000000020.0 |
| 0.00013     | R | SALLSELVSK    | G | emPAI                                |
| 0.0046      | K | EIFQAQVISR    | R |                                      |
| 0.000081    | R | EEAAPLIEAAYR  |   |                                      |
| 0.00015     | K | VATELGLWQES   |   |                                      |
| 0.0000033   | R | QTTEVSGPSAIR  |   |                                      |
| 0.0045      | R | QTTEVSGPSAIS  |   |                                      |
| 0.00056     | R | DRPDLSAPESLF  |   | emPAI                                |
| 0.001       | K | SEVLDFIR      | S |                                      |
| 0.00000014  | K | IADAEENLGES   | E |                                      |
| 0.000015    | K | AFGVSVDIFDCF  |   |                                      |
| 0.00049     | R | SHGMAPLYETA   |   |                                      |
| 0.0066      | R | GVEDLADAVKV   |   |                                      |
| 0.0000053   | K | IGVQIIQNALK   | T |                                      |
| 0.00000079  | K | SVAAGMNAMR    |   | 2 Oxidation (M) 0.000002002000.0     |
| 3.6E-09     | K | TLFNELEVVEGI  |   | emPAI                                |
| 0.000053    | R | VIIDSGAVPLFL  |   |                                      |
| 0.0041      | R | NATWTLSNFCG   |   |                                      |
| 0.000000026 | R | VVTVTLEGLNV   |   |                                      |
| 0.0000088   | R | LVQLLAHPSPST  |   |                                      |
| 0.003       | R | LLHSTDEEVLTI  |   | emPAI                                |
| 4.4E-10     | R | AGVDDLLGILKN  |   |                                      |
| 0.00000078  | R | WISEEFSIFLEIR |   |                                      |
| 0.001       | R | FSSSQIDYHEVC  |   | emPAI                                |
| 0.000022    | M | GIDLIAGGK     | S |                                      |
| 8.7E-09     | R | APLGQNTVLLIG  |   |                                      |
| 0.00000034  | K | AGGECLTFDQA   |   | emPAI                                |
| 0.0033      | K | SFKGEVLYR     | T |                                      |
| 0.000027    | K | IADVLLLMEK    | E |                                      |
| 0.000069    | R | ASSSTYSVLLRV  |   |                                      |
| 0.000054    | R | IEATTWDALIKL  |   |                                      |
| 0.00000026  | R | TLLANCVAAGIK  |   | emPAI                                |
| 0.0083      | K | TLSAPVPDVR    | S |                                      |
| 0.00000042  | R | TAAYEALNEVC   |   |                                      |
| 0.000000015 | R | NGILEAYSGIFCN |   |                                      |
| 0.00062     | K | TAIGVLGDLACE  |   | emPAI                                |
| 2.5E-09     | R | SIATLAITTLKT  |   |                                      |
| 0.0014      | R | SLMTFLSNILRE  |   |                                      |
| 0.0000019   | R | WSNEVQEGICS   |   |                                      |
| 0.00023     | R | ELTPAITVLQLIF |   | emPAI                                |
| 0.0021      | R | GASHHVLDEAS   |   |                                      |
| 0.000000017 | R | MASVFGAMAS    |   | Oxidation (M) 0.2000000000000000.0   |
| 0.0012      | R | SLHDALCVLSCV  |   |                                      |
| 0.0000078   | R | ALVAIPTTIADIA |   | emPAI                                |
| 4.4E-13     | R | LLVDEAVLQEG   |   |                                      |
| 0.000021    | K | RLLVDEAVLQEG  |   | emPAI                                |

|             |   |                 |                                               |       |
|-------------|---|-----------------|-----------------------------------------------|-------|
| 0.00000063  | K | YLSPLVDATLLIA   |                                               |       |
| 0.000018    | R | MIVVHPQLVP G    |                                               | emPAI |
| 0.000032    | K | YLSGLGIAR Q     |                                               |       |
| 0.00011     | R | AMNEINAAAF M    |                                               |       |
| 0.00027     | K | LLLDDVFEQK N    |                                               |       |
| 0.00000026  | R | GQIQAYVFDV A    |                                               |       |
| 0.006       | R | DVASQIRDGLI -   |                                               | emPAI |
| 0.000000029 | K | NPAAIVGAGLF T   |                                               |       |
| 9.1E-09     | R | FASEVAGVQD G    |                                               | emPAI |
| 0.00000038  | R | MNTIAPNLTA L    |                                               |       |
| 0.0000028   | R | SQFTELISGLGI Y  | Oxidation (M) 0.000000000000000020000000000.0 | emPAI |
| 0.004       | K | QLGDFFR T       |                                               |       |
| 0.000016    | K | SDTSVFDVFGF V   |                                               |       |
| 0.000032    | R | ALQFNTLPVVIT    |                                               |       |
| 0.0043      | K | TATEPLNPSEL M   |                                               |       |
| 0.000037    | K | SVETTLAELGV L   |                                               |       |
| 0.0026      | R | SIWAFGPKQ N     |                                               | emPAI |
| 0.00000003  | K | GVDLDALLDM L    |                                               |       |
| 0.005       | K | GVDLDALLDM I    |                                               | emPAI |
| 0.000079    | R | MSLLAEQR V      | Oxidation (M) 0.200000000.0                   |       |
| 0.000000021 | K | AGHQTSAESM A    |                                               |       |
| 0.00016     | R | HAIVSAIAATA G   |                                               | emPAI |
| 0.00019     | R | ALLIDLEPR V     |                                               |       |
| 0.000000051 | K | YISILNIIQGEVI I |                                               | emPAI |
| 0.000076    | R | IAGLEVL R I     |                                               |       |
| 0.0064      | R | IPAVQDLVR K     |                                               |       |
| 4.5E-09     | K | QFAAEEISAQV K   |                                               |       |
| 0.0025      | R | QAVVNPENTF R    |                                               |       |
| 0.00088     | R | IINEPTAASLAY K  |                                               | emPAI |
| 0.000000047 | R | ISADEGVLALM G   |                                               |       |
| 0.00005     | R | NYTNAFHALTI I   |                                               |       |
| 0.000003    | R | MQADNTLPLA R    | Oxidation (M) 0.200000000000.0                | emPAI |
| 0.000047    | R | GPASDLVPVLF Q   |                                               |       |
| 0.000004    | K | SDLGSSPLAQ C L  |                                               |       |
| 0.00000023  | K | NADVILTTLTG K   |                                               | emPAI |
| 0.000052    | R | AMNEINAASR M    |                                               |       |
| 0.00041     | K | SNSVFIPHGPC D   |                                               |       |
| 0.00000003  | R | NQIQAYVFDV A    |                                               |       |
| 0.0016      | R | NSVLAFSESVP D   |                                               | emPAI |
| 0.0025      | R | AAADQILR D      |                                               |       |
| 0.00047     | K | WAEIIGQAR H     |                                               |       |
| 0.00097     | K | DLYAEEAAAQ E    |                                               |       |
| 0.000012    | K | LLSEEVDFSR G    |                                               |       |
| 0.0000017   | R | NIAETGLNLLLI N  |                                               | emPAI |
| 0.0069      | K | TAYNLIQR E      |                                               |       |
| 0.0018      | R | LLVDLLQFLEPI N  |                                               |       |
| 0.0005      | R | STHPELVTVIEI I  |                                               |       |
| 0.00000019  | K | AIQTIDADIAQ R   |                                               |       |
| 0.000024    | K | IDLLPEIVEAPC A  |                                               | emPAI |
| 0.0063      | R | LVAIVER M       |                                               |       |
| 0.0000066   | K | LAPSGFVLLR D    |                                               |       |
| 0.0021      | K | FSATAGLGVIIH G  |                                               |       |
| 0.0000014   | R | IVSLLSESYNPI Y  |                                               |       |
| 0.0078      | R | QLLHFAVSDV T    |                                               | emPAI |
| 0.00055     | R | TVEYIPENSCD A   |                                               |       |
| 1.1E-10     | R | DLFEGILQAGS T   |                                               | emPAI |
| 0.0000018   | R | SPSVLVLLPTR E   |                                               |       |
| 0.000058    | K | FATLVATNVA G    |                                               |       |

|             |   |              |   |                                   |
|-------------|---|--------------|---|-----------------------------------|
| 0.0031      | K | VQVSELSGLLC  | A |                                   |
| 0.00024     | K | TLAFVLPILS   | L |                                   |
| 0.00084     | R | DLEIPLVFLK   | L |                                   |
| 1.1E-12     | R | VLAFANLVYSI  | N | emPAI                             |
| 0.0091      | K | TSLRPETVEAL  | E |                                   |
| 0.00000046  | R | DILSIPVSAAAF | E |                                   |
| 0.0048      | K | SISSDLNFTR   | Y |                                   |
| 2.3E-09     | K | SLEPFVNWLEI  | - |                                   |
| 0.0000086   | R | SLYELDVLAED  | K | emPAI                             |
| 0.0055      | K | LMGLKELLQAIC |   | Oxidation (M) 0.020000000000000.0 |
| 0.00000008  | R | NAAGTPLVQII  | V |                                   |
| 0.000075    | R | LDPLAEAVLLS  | L | emPAI                             |
| 0.00000007  | K | QSNILEDLATL  | L |                                   |
| 0.0000015   | K | RPDQPFPPTGQ  | W | emPAI                             |
| 0.00000076  | K | GVLQILLDLR   | F |                                   |
| 0.00000017  | K | WLSDELSAILLI | D |                                   |
| 0.0011      | K | SLCESISANISS | S | emPAI                             |
| 0.0056      | K | LAVLQFYK     | V |                                   |
| 0.000000015 | K | TITLEVESSDTI | A |                                   |
| 0.000018    | R | TLADYNIQKES  | L | emPAI                             |
| 0.0073      | R | LRHNVIR      | T |                                   |
| 0.0000097   | R | IGDLELFR     | T |                                   |
| 0.0056      | R | LLLGEIPER    | S |                                   |
| 0.0023      | K | FLDTFAQDR    | T |                                   |
| 0.00024     | K | ALRPYFELTNA  | I |                                   |
| 0.000013    | K | ETGDIYSTNEP  | I | emPAI                             |
| 4.9E-09     | R | SIVGATLEVIQI | K |                                   |
| 0.000006    | R | SDSQVFLFLNS  | C | emPAI                             |
| 0.00015     | K | GVVDSDDLPLIE |   |                                   |
| 0.0000061   | K | NYSQFVGFPIYS |   |                                   |
| 0.0000014   | R | FLSVTEPSLLGI | I | emPAI                             |
| 0.0068      | R | TNQQLAR      | I |                                   |
| 0.00000041  | K | DITTVLDLALR  | Q |                                   |
| 0.000000085 | R | LVLILGLADEL  | A | emPAI                             |
| 0.00013     | K | AIDEYASLR    | S |                                   |
| 0.0021      | K | FSATAGLGVIH  | G |                                   |
| 0.0000014   | R | IVSLLSESYNPI | Y |                                   |
| 0.0078      | R | QLLHFAVSDV   | T | emPAI                             |
| 0.000057    | K | VIEVEGPR     | G |                                   |
| 0.000046    | K | FLDGIYVSEK   | S |                                   |
| 0.0000011   | R | TALSHVDNLIS  | G |                                   |
| 0.0000064   | K | GTCVSASNCAI  | G |                                   |
| 0.000000008 | R | FKGTCVSASN   | G | emPAI                             |
| 0.00014     | K | VTVVPSAAALI  | A |                                   |
| 0.000000025 | K | HNGNISFDDV   | I |                                   |
| 0.00029     | R | GLSVFISDVR   | N |                                   |
| 0.0022      | K | VSAYILGEYGH  | Q |                                   |
| 0.000000092 | K | FLQPLQLTSEE  | A |                                   |
| 0.0017      | R | DLGVLTSSSTLI | C | emPAI                             |
| 0.000000014 | K | ISDVLLLMER   | E |                                   |
| 0.000046    | R | SLLPLYADIGD  | R | emPAI                             |
| 0.00000082  | R | TASMDFVTEL   | K |                                   |
| 0.0018      | K | FIQFVVDIFKR  | Y |                                   |
| 0.000067    | R | NQILVFSQVFV  |   |                                   |
| 0.00031     | R | AISTILESISLP | K | emPAI                             |
| 0.0062      | K | LLGGLAVR     | R |                                   |
| 0.0000021   | R | GLCAIAQAESL  | Y |                                   |
| 0.0000001   | R | ELAEDGYSGVIV |   | emPAI                             |

|             |   |                |                                    |       |
|-------------|---|----------------|------------------------------------|-------|
| 0.00000011  | K | WLDLATLMVTI    |                                    |       |
| 0.000017    | R | MLNEDELRLDAQ   |                                    |       |
| 0.0013      | R | HYFQNTQGLIFV   |                                    | emPAI |
| 0.002       | R | FLALDEADR M    |                                    |       |
| 2.7E-09     | R | TPILVATDVAA G  |                                    |       |
| 0.0033      | R | LAADFLANYIF V  |                                    | emPAI |
| 0.0000026   | K | SVAAGSATVA' S  |                                    |       |
| 0.000082    | K | SGAAPVVSAA V   |                                    |       |
| 0.00016     | R | YGNATVVENT G   |                                    | emPAI |
| 0.00013     | R | TGNENAQLTP L   |                                    |       |
| 0.0000001   | R | TESAAVSTIVN E  |                                    | emPAI |
| 0.000041    | R | AAALNIVPTST A  |                                    |       |
| 0.0000002   | K | GILDVCDAPLV C  |                                    | emPAI |
| 0.00024     | K | ILLENAGAVFR T  |                                    |       |
| 8.3E-09     | R | LLGLDTILNIVV R |                                    |       |
| 0.0033      | R | APLVVAAIQTL N  |                                    | emPAI |
| 0.0012      | K | VLAPYSAEDAF G  |                                    |       |
| 0.00091     | R | LALPQIEDIVR A  |                                    |       |
| 7.6E-09     | K | LAEEGISAEVIN S |                                    | emPAI |
| 0.0000029   | K | TPGPGAQSAL A   |                                    |       |
| 0.0026      | K | VETVTLGPSVF E  |                                    |       |
| 0.0000024   | R | IEDVTPIPTDST R |                                    | emPAI |
| 0.000022    | K | ILQLLR L       |                                    |       |
| 0.000048    | K | LLFIIR I       |                                    |       |
| 0.0000068   | R | IALDNSIVEQ, H  |                                    | emPAI |
| 0.000000081 | K | AIGNFGLSLLR Q  |                                    |       |
| 0.000037    | R | IAAPGISVWNI G  |                                    | emPAI |
| 0.0000015   | R | QTAPDATYVY T   |                                    |       |
| 0.0000017   | R | NRIPQSPQENI L  |                                    | emPAI |
| 0.000000019 | K | LAVNTIGSLVR A  |                                    |       |
| 0.00032     | K | SIDAGDYDYAI I  |                                    | emPAI |
| 5.3E-09     | R | ILSALLTGVNR A  |                                    |       |
| 0.0016      | K | AVVIDEVSFL A   |                                    | emPAI |
| 0.0000031   | R | GEGTSTIVNPR K  |                                    |       |
| 0.00082     | K | VIGVGGGGSN M   |                                    |       |
| 0.00026     | K | LLTAVSQSTPV Q  |                                    | emPAI |
| 0.0000065   | R | LVELANESFR S   |                                    |       |
| 0.00063     | K | SPCQILVATPG L  |                                    |       |
| 0.0016      | K | TVAFLPSIEA\ A  |                                    |       |
| 0.0072      | K | VLVLDEADHLI E  | Oxidation (M) 0.0000000000020000.0 | emPAI |
| 0.00012     | R | HNTLLEEQR H    |                                    |       |
| 0.000014    | R | SFSVYNNPSAC K  |                                    |       |
| 0.00083     | R | HIDPLWPSDH S   |                                    | emPAI |
| 7.5E-09     | R | VVVEVEQEDA R   |                                    |       |
| 0.0036      | K | GIYPTEIYNLSE L |                                    | emPAI |
| 0.00000021  | R | SSVSSLQSSIR R  |                                    |       |
| 0.000072    | K | LVSMIENLLER I  |                                    | emPAI |
| 0.0000042   | R | SLDSHIEDQFA L  |                                    |       |
| 0.0000095   | R | VLDVVYNASN T   |                                    | emPAI |
| 0.00016     | K | NPVLTSFATGF A  |                                    |       |
| 0.0000015   | K | AVVSSPLGGEF S  |                                    | emPAI |
| 0.0013      | R | LNILPFK V      |                                    |       |
| 0.0035      | K | VLSMAPGLER L   | Oxidation (M) 0.0002000000.0       |       |
| 0.00004     | R | SQDFLFISGTK M  |                                    |       |
| 0.0013      | K | AGNWLIGGDI F   |                                    | emPAI |
| 0.00012     | R | VLINAFTVR A    |                                    |       |
| 0.000000052 | K | LLPLLASSLEFG M |                                    | emPAI |
| 0.009       | R | YLTVQFVR F     |                                    |       |

|             |   |               |   |                                      |       |
|-------------|---|---------------|---|--------------------------------------|-------|
| 0.00031     | K | ALFGVNLQSR    | L |                                      |       |
| 0.00000059  | K | SALSNYSLAAR   | S |                                      | emPAI |
| 0.0035      | R | ASDLSPEVSSA   | Q |                                      |       |
| 0.000000026 | K | SVNIDNAVTLA   | A |                                      | emPAI |
| 0.000078    | K | VAQSITAAIR    | N |                                      |       |
| 0.0000006   | K | LISDVELAAER   | R |                                      | emPAI |
| 0.0022      | K | TAEVAALVR     | S |                                      |       |
| 0.0047      | R | AISATNLYLR    | V |                                      |       |
| 0.0022      | R | YIQPWESEFID   | V |                                      |       |
| 0.00031     | R | TDVIQALGGVIG  |   |                                      |       |
| 0.00015     | R | EELGLIEQAYD   | I |                                      | emPAI |
| 0.00061     | K | SPMAGTFYR     | S | Oxidation (M) 0.002000000.0          |       |
| 0.0000028   | K | QLDCELVIR     | K |                                      |       |
| 0.0065      | K | ESSASSPELATIL |   |                                      | emPAI |
| 0.0000079   | K | TVSSAITESFQIG |   |                                      |       |
| 0.00017     | R | LQGEIQPLEY    |   |                                      |       |
| 0.006       | K | AFFNQVIALSE   | R |                                      | emPAI |
| 0.000000088 | R | LASLISLDGILK  | Q |                                      |       |
| 0.00085     | R | TGDALQSQDIIA  |   |                                      | emPAI |
| 0.00013     | K | STYSGFELFR    | I |                                      |       |
| 0.0026      | K | VALVQIPSKVE   | Q |                                      |       |
| 0.0000032   | R | SGPDTEVFWNQ   |   |                                      | emPAI |
| 0.000011    | R | LLILTDPRT     |   |                                      |       |
| 0.000013    | R | HTPGTFTNQML   |   | Oxidation (M) 0.000000000200000000.0 | emPAI |
| 0.00084     | R | YAQVFQVR      | Y |                                      |       |
| 0.0028      | K | VLRPFLLR      | R |                                      |       |
| 0.00074     | K | LALDALVIQQCL  |   |                                      |       |
| 0.000015    | K | LRDYQLAGLN'L  |   |                                      | emPAI |
| 0.00011     | K | DLLSVYGYLQFE  |   |                                      |       |
| 0.0000027   | R | TLLANHVATSI'T |   |                                      | emPAI |
| 0.000086    | K | TLAFLIPAVELL  | E |                                      |       |
| 0.000003    | K | ALLVLIPEELQFY |   |                                      |       |
| 0.00077     | K | TLAFLIPAVELL  | F |                                      | emPAI |
| 0.00004     | R | VVGVLGSSSF    | G |                                      |       |
| 0.000055    | K | VVVHPLVLLSI'V |   |                                      | emPAI |
| 0.00033     | K | TYGFLTPEFWIE  |   |                                      |       |
| 0.0000058   | K | VLQFAGIDDVIG  |   |                                      | emPAI |
| 0.000073    | K | VLPEMILICQNN  |   |                                      |       |
| 0.000032    | K | TQTTHAQPDCS   |   |                                      | emPAI |
| 0.00055     | K | GTVEIITPVELIK |   |                                      |       |
| 0.00000081  | R | VGLVAPIDVVI   |   |                                      | emPAI |
| 0.00037     | K | HNEIQTANIK    | S |                                      |       |
| 0.0000069   | K | SIGADYEVTDC   | L |                                      | emPAI |
| 0.00074     | R | YGDFFLR       | Q |                                      |       |
| 0.000015    | K | LVDESVNSQLFD  |   |                                      | emPAI |
| 0.0055      | K | TGFVFPR       | V |                                      |       |
| 0.0000021   | R | ILGEQVQIVR    | D |                                      |       |
| 0.0014      | K | LLPLPELLQSI   | A |                                      | emPAI |
| 0.00028     | K | SFSSGGEDGYL   |   |                                      |       |
| 0.00004     | R | LHHFDSDYFNI-  |   |                                      | emPAI |
| 0.000002    | K | FLSTLQNIPSV'S |   |                                      | emPAI |
| 0.0035      | K | ILNIER        | K |                                      |       |
| 0.0026      | R | TIDGGTHIEGVA  |   |                                      |       |
| 0.000034    | K | SSLETVLTVLHF  |   |                                      | emPAI |
| 0.00049     | K | SLLFFQGQR     | S |                                      |       |
| 0.000064    | R | DDYSHAEPAT'S  |   |                                      | emPAI |
| 0.0039      | K | IASLQNEVR     | K |                                      |       |
| 0.0000067   | R | AVFGEVYPDP'V  |   |                                      | emPAI |

|            |              |              |               |                                       |                 |  |       |
|------------|--------------|--------------|---------------|---------------------------------------|-----------------|--|-------|
| 0.0053     | R            | NLQDAMSVAI   | N             |                                       |                 |  |       |
| 0.00026    | K            | TAIEAACMLLF  | I             |                                       |                 |  |       |
| 0.00022    | R            | TLAQNGVNV    | T             |                                       |                 |  | emPAI |
| 0.001      | R            | YDFASPWEQ    | S             |                                       |                 |  |       |
| 0.000036   | R            | VVSEPIEMTQI  | Y             | Oxidation (M) 0.0000000200000.0       |                 |  | emPAI |
| 0.0036     | K            | NLYIISVK     | G             |                                       |                 |  |       |
| 0.0000055  | R            | MSLGLPVAAT   | N             | Oxidation (M) 0.2000000000000000000.0 |                 |  | emPAI |
| 0.000013   | K            | SSLAASASQVF  | S             |                                       |                 |  |       |
| 0.0076     | R            | NPAITPQTFPC  | L             |                                       |                 |  | emPAI |
| 0.002      | R            | QCLFGGLR     | I             |                                       |                 |  |       |
| 0.000014   | R            | GLLGTVGTIAR  | E             |                                       |                 |  | emPAI |
| 0.0087     | R            | YKVAVDAEEG   | R             |                                       |                 |  |       |
| 0.0041     | R            | NATWTLSNFC   | G             |                                       |                 |  |       |
| 0.000026   | R            | LIQLLGHSSPS  | T             |                                       |                 |  | emPAI |
| 0.000012   | K            | AGALGDSVTIT  | E             |                                       |                 |  |       |
| 0.0085     | K            | ITVTADGQFSK  | R             |                                       |                 |  | emPAI |
| 0.0041     | R            | NATWTLSNFC   | G             |                                       |                 |  |       |
| 0.000013   | R            | LVELLGHQSPT  | T             |                                       |                 |  | emPAI |
| 0.0095     | R            | IFEGEALLR    | R             |                                       |                 |  |       |
| 0.000014   | R            | YGLLDESQNKI  | R             |                                       |                 |  | emPAI |
| 0.000018   | K            | AGALGDSVSIT  | E             |                                       |                 |  |       |
| 0.0085     | K            | ITVTADGQFSK  | R             |                                       |                 |  | emPAI |
| 0.0009     | K            | IASETGVPVGC  | L             |                                       |                 |  |       |
| 0.00019    | K            | ATPEVATATPL  | K             |                                       |                 |  | emPAI |
| 0.00034    | K            | HIDATLGSGNI  | E             |                                       |                 |  |       |
| 0.0022     | K            | ELAPLQELIESI | -             |                                       |                 |  | emPAI |
| 0.0048     | K            | VGIALALKP    | -             |                                       |                 |  |       |
| 0.0000069  | K            | SFFT VSGEVDS | A             |                                       |                 |  | emPAI |
| 0.0086     | R            | TLGSSALEAR   | H             |                                       |                 |  |       |
| 0.00026    | R            | IFEFLHSPDSGI | I             |                                       |                 |  | emPAI |
| 0.0007     | K            | SLADADYR     | V             |                                       |                 |  |       |
| 0.00058    | R            | YAPGIEILSVR  | V             |                                       |                 |  | emPAI |
| 0.0087     | R            | LILVESR      | I             |                                       |                 |  |       |
| 0.00046    | K            | KGLTPSQIGVII | D             |                                       |                 |  |       |
| 0.0023     | K            | TTPQDVDESIC  | F             |                                       |                 |  | emPAI |
| 0.00036    | R            | SPLVSFLYER   | G             |                                       |                 |  |       |
| 0.0048     | R            | SGGVFVGTTFI  | Y             |                                       |                 |  | emPAI |
| 0.0096     | K            | LTIIEEAR     | K             |                                       |                 |  |       |
| 0.00014    | K            | SRECLPLVLIIR | N             |                                       |                 |  | emPAI |
| 0.0059     | R            | AMIGQVAGG    | T             |                                       |                 |  |       |
| 0.0028     | R            | ASGDYAIIVIAH | I             |                                       |                 |  | emPAI |
| 0.005      | R            | DHACVVGGYF   | M             |                                       |                 |  |       |
| 0.0025     | R            | TNVIPIIEDAR  | H             |                                       |                 |  | emPAI |
| 0.005      | R            | AVVDEV LAPR  | D             |                                       |                 |  |       |
| 0.0027     | K            | LVASADDLSVI  | A             |                                       |                 |  | emPAI |
| 0.0052     | R            | YSEVETSTVR   | I             |                                       |                 |  |       |
| 0.0057     | K            | TMGEILASLLN  | -             | Oxidation (M) 0.000000000020.0        |                 |  | emPAI |
| 0.0036     | R            | ANLNDFDR     | F             |                                       |                 |  |       |
| 0.0085     | R            | LSLTDIVIDINR | K             |                                       |                 |  | emPAI |
| 0.0081     | K            | TQIHVAADDSI  | H             |                                       |                 |  |       |
| 0.0096     | K            | SQQDTFLPVIE  | C             |                                       |                 |  | emPAI |
| pep_expect | pep_res_befo | pep_seq      | pep_res_after | pep_var_mod                           | pep_var_mod_pos |  |       |
| 4.40E-06   | K            | SSVCDIAPK    | G             |                                       |                 |  |       |
| 3.10E-06   | R            | YLTASAVFR    | G             |                                       |                 |  |       |
| 2.40E-06   | K            | LAVNLIPFPR   | L             |                                       |                 |  |       |
| 0.00064    | R            | FPGQLNSDLR   | K             |                                       |                 |  |       |
| 1.40E-06   | R            | VSEQFTAMFR   | R             |                                       |                 |  |       |
| 8.30E-07   | R            | IDVYFNEASGC  | Y             |                                       |                 |  |       |

|            |                |                                           |       |
|------------|----------------|-------------------------------------------|-------|
| 2.40E-06 R | MMMTFSVFP V    |                                           |       |
| 1.20E-05 R | LHFFMVGFP G    |                                           |       |
| 9.20E-06 R | AVLMDLEPGT S   |                                           |       |
| 3.80E-07 K | NSSYFVEWIP S   |                                           |       |
| 9.00E-10 R | EILHIQGGQCC F  |                                           |       |
| 1.80E-12 K | MASTFIGNST R   | 2 Oxidation (f 0.20000000000000200.0      |       |
| 6.50E-11 K | GHYTEGAELIC K  |                                           |       |
| 3.60E-06 R | GSQQYSALSVI N  |                                           |       |
| 3.10E-07 K | LANPTFGDLNI F  | Oxidation (M) 0.00000000000000020000000.0 |       |
| 5.50E-06 R | SGPFGQIFRPE G  |                                           |       |
| 8.90E-08 K | FWEVICDEHG I   |                                           |       |
| 1.30E-08 K | EAENSDCLQG I   |                                           | emPAI |
| 0.0029 R   | YLTASAMFR G    |                                           |       |
| 2.40E-06 K | LAVNLIPFPR L   |                                           |       |
| 0.00064 R  | FPGQLNSDLR K   |                                           |       |
| 1.40E-06 R | VSEQFTAMFR R   |                                           |       |
| 1.20E-06 R | YTGDSLQLEF I   |                                           |       |
| 6.50E-05 R | MMLTFSVFPS V   |                                           |       |
| 1.10E-09 R | INVYYNEASCC F  |                                           |       |
| 2.00E-07 K | EVDEQMLNV( N   |                                           |       |
| 1.20E-05 R | LHFFMVGFP G    |                                           |       |
| 9.20E-06 R | AVLMDLEPGT S   |                                           |       |
| 3.80E-07 K | NSSYFVEWIP S   |                                           |       |
| 9.00E-10 R | EILHIQGGQCC F  |                                           |       |
| 1.80E-12 K | MASTFIGNST R   | 2 Oxidation (f 0.20000000000000200.0      |       |
| 6.50E-11 K | GHYTEGAELIC K  |                                           |       |
| 1.80E-08 R | SGPYGQTFRPI G  |                                           | emPAI |
| 1.80E-07 K | DAGVIAGLNV I   |                                           |       |
| 2.00E-05 R | FTDSSVQSDIK L  |                                           |       |
| 3.20E-05 R | VEIANDQGNIT    |                                           |       |
| 0.0018 R   | MVNHVFQEFIR    |                                           |       |
| 9.70E-07 R | FEELNIDLFR K   |                                           |       |
| 6.50E-06 R | EIAEAYLGTTIK N |                                           |       |
| 2.50E-06 K | NALENYAYNV N   |                                           |       |
| 5.30E-05 K | ELESICNPIAK M  |                                           |       |
| 8.50E-08 K | VQQLLVDFFN E   |                                           |       |
| 9.30E-09 K | NSIDDVVLVGI    |                                           |       |
| 4.70E-07 R | TTPSYVAFTDS L  |                                           |       |
| 0.00053 R  | ARFEELNIDLFI K |                                           |       |
| 2.50E-06 K | EFSAEIISMIL M  |                                           |       |
| 1.40E-09 K | NQVAMNPIN R    |                                           |       |
| 7.20E-09 K | ATAGDTHLGG M   |                                           |       |
| 0.00052 K  | NAVVTVPAYFI Q  |                                           |       |
| 1.60E-14 K | SINPDEAVAYC V  |                                           |       |
| 0.0053 K   | GEGPAIGIDLGV   |                                           |       |
| 3.60E-07 K | EQVFSTYSDN( A  |                                           | emPAI |
| 0.0029 R   | YLTASAMFR G    |                                           |       |
| 2.40E-06 K | LAVNLIPFPR L   |                                           |       |
| 0.00064 R  | FPGQLNSDLR K   |                                           |       |
| 1.40E-06 R | VSEQFTAMFR R   |                                           |       |
| 6.50E-05 R | MMLTFSVFPS V   |                                           |       |
| 7.60E-08 R | VNVYYNEASC F   |                                           |       |
| 2.00E-07 K | EVDEQMINV( N   |                                           |       |
| 1.20E-05 R | LHFFMVGFP G    |                                           |       |
| 9.30E-05 R | AVLMDLEPGT S   |                                           |       |
| 3.80E-07 K | NSSYFVEWIP S   |                                           |       |
| 9.00E-10 R | EILHIQGGQCC F  |                                           |       |
| 1.80E-12 K | MASTFIGNST R   | 2 Oxidation (f 0.20000000000000200.0      |       |

|          |   |              |                                  |                                           |
|----------|---|--------------|----------------------------------|-------------------------------------------|
| 6.50E-11 | K | GHYTEGAELIC  |                                  |                                           |
| 1.10E-05 | R | SGPYGQIFRPG  |                                  | emPAI                                     |
| 1.80E-07 | K | DAGVIAGLNV   |                                  |                                           |
| 3.20E-05 | R | VEIANDQGNIT  |                                  |                                           |
| 0.0001   | R | FSDSSVQSDM   |                                  |                                           |
| 0.0018   | R | MVNHVQEFIR   |                                  |                                           |
| 1.90E-06 | R | FEELNMDLFR   |                                  |                                           |
| 2.50E-06 | K | NALENYAYNV   |                                  |                                           |
| 5.30E-05 | K | ELESICNPIAK  |                                  |                                           |
| 6.60E-05 | K | STVHDVVLVG   |                                  |                                           |
| 0.00011  | K | VQQLQDFFN    |                                  |                                           |
| 4.70E-07 | R | TTPSYVAFTDS  |                                  |                                           |
| 9.20E-05 | R | ARFEELNMDL   |                                  |                                           |
| 3.10E-08 | K | EFAAEEISSMV  |                                  |                                           |
| 3.20E-09 | K | NQVAMNPVN    | Oxidation (M) 0.00002000000000.0 |                                           |
| 7.20E-09 | K | ATAGDTHLGG   |                                  |                                           |
| 0.00052  | K | NAVVTVPAYFI  |                                  |                                           |
| 9.20E-13 | K | SINPDEAVAYCV |                                  |                                           |
| 0.0053   | K | GEGPAIGIDLGV |                                  |                                           |
| 3.60E-07 | K | EQVFSTYSDNCA |                                  | emPAI                                     |
| 0.0029   | R | YLTASAMFR    | G                                |                                           |
| 2.40E-06 | K | LAVNLIPFPR   | L                                |                                           |
| 0.00064  | R | FPGQLNSDLR   | K                                |                                           |
| 1.40E-06 | R | VSEQFTAMFR   | R                                |                                           |
| 0.00069  | R | YVGDELQLEFV  |                                  |                                           |
| 2.40E-06 | R | MMMTFSVFP    | V                                |                                           |
| 7.60E-08 | R | VNVYYNEASC   | Y                                |                                           |
| 2.00E-07 | K | EVDEQMLNV    | CN                               |                                           |
| 1.20E-05 | R | LHFFMVGFP    | G                                |                                           |
| 9.30E-05 | R | AVLMDLEPGT   | S                                |                                           |
| 3.80E-07 | K | NSSYFVEWIP   | S                                |                                           |
| 1.80E-12 | K | MASTFIGNST   | R                                | 2 Oxidation (M) 0.20000000000000200.0     |
| 6.50E-11 | K | GHYTEGAELIC  |                                  |                                           |
| 1.10E-05 | R | SGPYGQIFRPG  |                                  | emPAI                                     |
| 6.10E-06 | K | DVNAAVGTIK   | T                                |                                           |
| 2.40E-05 | K | YMACCLMYR    | G                                |                                           |
| 0.0044   | R | QLFHPEQLISG  | E                                |                                           |
| 1.20E-09 | R | LVSQVISSLTA  | F                                |                                           |
| 9.60E-07 | R | TIQFVDWCPT   | C                                |                                           |
| 0.0003   | R | SLSIERPTYTNL | L                                |                                           |
| 1.30E-06 | R | AVFVDLEPTVI  | T                                |                                           |
| 5.30E-10 | R | IHFMLSSYAPV  | A                                |                                           |
| 2.50E-10 | R | AVCMISNSTS   | I                                |                                           |
| 7.40E-08 | K | CGINYQPPTV   | V                                |                                           |
| 1.30E-09 | K | TVGGGDDAF    | H                                |                                           |
| 3.50E-06 | R | AFVHWYVGE    | E                                |                                           |
| 1.90E-09 | R | FDGALNVDVT   | I                                |                                           |
| 0.00062  | K | AFHEQLSVAEI  | C                                | Oxidation (M) 0.00000000000000000000200.0 |
| 0.00038  | R | ALGDYLGVK    | V                                |                                           |
| 0.00029  | R | ELAQQIEK     | V                                |                                           |
| 3.30E-05 | K | GVAINFVTR    | D                                |                                           |
| 0.0065   | R | DELTLEGIK    | Q                                |                                           |
| 2.10E-07 | R | VLITDLLAR    | G                                |                                           |
| 5.20E-05 | K | VHACVGGTSV   | E                                |                                           |
| 0.0034   | K | RDELTLEGIK   | Q                                |                                           |
| 3.10E-10 | K | GLDVIQQAQS   | T                                |                                           |
| 1.10E-06 | R | ILQAGVHVVV   | V                                |                                           |
| 1.10E-08 | K | MFVLDEADEN   | G                                | Oxidation (M) 0.200000000000.0            |

|            |                |                                        |       |
|------------|----------------|----------------------------------------|-------|
| 7.30E-08 R | GIYAYGFEKPS G  |                                        |       |
| 1.40E-06 K | FYNVVEELPS -   |                                        |       |
| 1.20E-07 R | SRDHTVSATH D   |                                        |       |
| 5.00E-12 K | IQVGVFSATM K   |                                        |       |
| 0.00029 R  | ELAQQIEK V     |                                        |       |
| 0.0065 R   | DELTLEGIK Q    |                                        |       |
| 2.10E-07 R | VLITDLLAR G    |                                        |       |
| 5.20E-05 K | VHACVGGTSV E   |                                        |       |
| 0.0034 K   | RDELTLEGIK Q   |                                        |       |
| 3.10E-10 K | GLDVIQQAQS T   |                                        |       |
| 3.60E-06 K | GVAINFVTLDI M  |                                        |       |
| 1.10E-06 R | ILQAGVHVVV V   |                                        |       |
| 1.10E-08 K | MFVLDEADEN G   | Oxidation (M) 0.200000000000.0         |       |
| 7.30E-08 R | GIYAYGFEKPS G  |                                        |       |
| 1.40E-06 K | FYNVVEELPS -   |                                        |       |
| 1.20E-07 R | SRDHTVSATH D   |                                        |       |
| 5.00E-12 K | IQVGVFSATM K   |                                        |       |
| 3.20E-07 K | DAGVIAGLNV I   |                                        |       |
| 3.20E-05 R | VEIANDQGNIT    |                                        |       |
| 0.0018 R   | MVNHVFQEFIR    |                                        |       |
| 2.50E-06 K | NALENYAYNV N   |                                        |       |
| 0.00011 K  | VQQLQDFFN E    |                                        |       |
| 4.70E-07 R | TTPSYVAFTDS L  |                                        |       |
| 3.20E-09 K | NQVAMNPVN R    | Oxidation (M) 0.00002000000000.0       |       |
| 7.20E-09 K | ATAGDTHLGG M   |                                        |       |
| 0.00052 K  | NAVVTVPAYFI Q  |                                        |       |
| 1.60E-14 K | SINPDEAVAYC V  |                                        |       |
| 0.0053 K   | GEGPAIGIDL G   |                                        | emPAI |
| 3.20E-05 R | VEIANDQGNIT    |                                        |       |
| 0.00024 K  | DAGVISGLNVI I  |                                        |       |
| 1.20E-05 R | EIAEFLGSPVI N  |                                        |       |
| 0.0018 R   | MVNHVFQEFIR    |                                        |       |
| 1.90E-06 R | FEELNMDLFR K   |                                        |       |
| 2.50E-06 K | NALENYAYNV N   |                                        |       |
| 0.00011 K  | VQQLQDFFN E    |                                        |       |
| 4.70E-07 R | TTPSYVAFTDS L  |                                        |       |
| 9.20E-05 R | ARFEELNMDL K   |                                        |       |
| 7.20E-09 K | ATAGDTHLGG M   |                                        |       |
| 0.00052 K  | NAVVTVPAYFI Q  |                                        |       |
| 1.60E-14 K | SINPDEAVAYC V  |                                        |       |
| 0.0053 K   | GEGPAIGIDL G   |                                        | emPAI |
| 0.0078 R   | INAEDPFK G     |                                        |       |
| 0.0038 K   | LIVWAPTR E     |                                        |       |
| 0.00065 K  | LILDVEDFK N    |                                        |       |
| 5.50E-05 K | FGNVVHFGER D   |                                        |       |
| 5.90E-05 R | YKQEDIVLR G    |                                        |       |
| 6.50E-05 R | VANEIGFPVM A   |                                        |       |
| 1.10E-07 R | GSFYFMEMN I    |                                        |       |
| 0.0026 R   | ITSYLPSSGGPF M |                                        |       |
| 4.20E-06 K | LLEEAPSPALT K  |                                        |       |
| 2.60E-06 R | DHGINFIGPNF V  |                                        |       |
| 2.10E-11 K | SEAAAAFGND F   |                                        |       |
| 3.30E-11 K | HEEELAEPQEI D  |                                        |       |
| 1.50E-05 R | ALNDTIITGVP L  |                                        |       |
| 2.30E-08 K | NAGVPTVPGS V   |                                        |       |
| 1.10E-05 R | IQVEHPVTEM V   | Oxidation (M) 0.00000000020000000000.0 | emPAI |
| 0.0029 R   | YLTASAMFR G    |                                        |       |
| 2.40E-06 K | LAVNLIPFPR L   |                                        |       |

|          |   |             |   |                                          |
|----------|---|-------------|---|------------------------------------------|
| 0.00064  | R | FPGQLNSDLR  | K |                                          |
| 1.40E-06 | R | VSEQFTAMFR  | R |                                          |
| 6.50E-05 | R | MMLTFSVFPS  | V |                                          |
| 7.60E-08 | R | VNVYYNEASC  | Y |                                          |
| 2.00E-07 | K | EVDEQMINVC  | N |                                          |
| 1.20E-05 | R | LHFFMVGFP   | G |                                          |
| 3.80E-07 | K | NSSYFVEWIP  | S |                                          |
| 0.00054  | K | GHYTEGAELI  | K | emPAI                                    |
| 6.00E-08 | R | SGAVASAVM   | K |                                          |
| 0.0062   | K | ISWVDPK     | T |                                          |
| 6.70E-12 | R | GYAATAAQGS  | S |                                          |
| 5.00E-12 | R | PETGSNEIDA  | A |                                          |
| 1.40E-07 | K | TGYRPEGSM   | A | Methyl (DE) 0.000000100000000000.0       |
| 6.10E-06 | K | DVNAAVGTIK  | T |                                          |
| 2.40E-05 | K | YMACCLMYR   | G |                                          |
| 0.0044   | R | QLFHPEQLIS  | E |                                          |
| 1.30E-11 | R | LISQISSLTTS | L |                                          |
| 1.20E-06 | R | TVQFVDWCP   | C |                                          |
| 1.30E-06 | R | AVFVDLEPTV  | I |                                          |
| 7.10E-11 | R | AVCMISNNTA  | I |                                          |
| 7.40E-08 | K | CGINYQPPTV  | V |                                          |
| 3.50E-06 | R | AFVHWYVGE   | E |                                          |
| 0.0034   | R | IGINGFGR    | I |                                          |
| 9.10E-10 | R | VPTVDVSVVD  | L |                                          |
| 2.00E-05 | K | TLLFGEKPVTV | N |                                          |
| 1.90E-06 | K | DAPMFVVGVI  | S |                                          |
| 3.40E-07 | K | LVSWYDNEW   | V |                                          |
| 2.30E-06 | R | FGIVEGLMTT  | T |                                          |
| 6.20E-12 | K | GILGYTEDDV  | S |                                          |
| 6.10E-12 | K | SDLDIVSNASC | V | emPAI                                    |
| 0.0063   | K | EHILLAK     | Q |                                          |
| 0.00062  | K | FEAIIYVLK   | K |                                          |
| 2.30E-05 | K | TVGAGVIGTIL | - |                                          |
| 3.50E-07 | K | VGETVDLVGLI | E |                                          |
| 1.70E-06 | R | SYTVTGVEMF  | I |                                          |
| 1.70E-06 | K | KYDEIDAAPEE | A |                                          |
| 2.70E-09 | K | ILDEALAGDN  | G |                                          |
| 2.30E-06 | R | HYAHVDCPG   | N |                                          |
| 0.00033  | K | IVVELIPVAC  | F |                                          |
| 9.50E-08 | K | TTLTAALTMAI | K | Oxidation (M) 0.00000000200000000000.0   |
| 2.60E-07 | K | EDQVDDAELL  | E | emPAI                                    |
| 0.0026   | R | QTVAVGVIK   | S |                                          |
| 0.003    | K | ARYDEIIK    | E |                                          |
| 9.90E-07 | K | IGGIGTVPVGR | V |                                          |
| 0.0012   | R | STNLDWYK    | G |                                          |
| 0.00015  | K | STTTGHLIYK  | L |                                          |
| 0.0047   | R | FEKEAAEMNK  | R | Methyl (DE) 0.0001000000.0               |
| 2.40E-08 | R | EHALLAFTLGV | Q |                                          |
| 5.70E-06 | K | YYCTVIDAPG  | D |                                          |
| 1.70E-05 | K | FHINIVVIGHV | S |                                          |
| 0.00055  | K | MTPTKPMVVI  | F | 2 Oxidation (M) 0.20000020000000000000.0 |
| 3.70E-05 | R | VETGMIKPGV  | S |                                          |
| 1.10E-05 | K | NMITGTSQADD | D |                                          |
| 0.0098   | R | VPPEVMESIR  | K |                                          |
| 4.10E-07 | R | HENVDIVVIR  | E |                                          |
| 0.0002   | R | HLQFPSFADR  | L |                                          |
| 4.10E-07 | K | LADGLFLESCR | E |                                          |
| 1.40E-06 | K | YAFEYAYLNNF | K |                                          |

|          |   |               |                                  |       |
|----------|---|---------------|----------------------------------|-------|
| 3.80E-08 | K | TPVGGGVSSLI   |                                  |       |
| 7.30E-05 | K | ANPVALLSSA    | Oxidation (M) 0.00000000002000.0 |       |
| 7.00E-10 | K | DLGGTSTTQE    |                                  | emPAI |
| 0.00032  | K | TDGLFLK       |                                  |       |
| 0.0083   | R | SLNLTR        |                                  |       |
| 0.00024  | R | YDDVDLITIR    |                                  |       |
| 6.00E-07 | K | TRYDDVDLITII  |                                  |       |
| 1.10E-11 | R | TADLGGSSTTTA  |                                  |       |
| 9.10E-08 | R | TQSFLTWESLE   |                                  |       |
| 2.00E-07 | K | NLANPTALLLS   |                                  |       |
| 3.70E-07 | R | ENTEGEYSGLE   |                                  | emPAI |
| 0.0062   | K | VQQTIR        |                                  |       |
| 0.00026  | K | EIEDAVADLR    |                                  |       |
| 3.20E-05 | K | VQSIVAEIFGK   |                                  |       |
| 1.50E-05 | R | SSGGLSEDDIQ   |                                  |       |
| 1.40E-05 | R | QAVTNPTNTV    |                                  |       |
| 1.00E-09 | K | EVDEVLLVGGIV  |                                  |       |
| 0.0048   | K | AVVTVPAYFNI   |                                  |       |
| 4.90E-06 | R | SRFETLVNHLIIT |                                  |       |
| 9.60E-11 | K | SQVFSTAADN    |                                  | emPAI |
| 0.001    | R | SDNIDLTK      |                                  |       |
| 5.60E-06 | K | VQEIVSEIFGK   |                                  |       |
| 8.80E-06 | R | SSGGLSDDEIN   |                                  |       |
| 6.30E-05 | R | TAMAGEDVEIA   | Oxidation (M) 0.002000000000.0   |       |
| 9.00E-06 | R | NSADTTIYSVE   |                                  |       |
| 0.00068  | K | FSPSQIGANVL   |                                  |       |
| 1.00E-09 | K | EVDEVLLVGGIV  |                                  |       |
| 0.0048   | K | AVVTVPAYFNI   |                                  |       |
| 9.30E-10 | K | IPAEIASEIETA  |                                  | emPAI |
| 0.0083   | R | SLNLTR        |                                  |       |
| 0.00024  | R | YDDVDLITIR    |                                  |       |
| 6.00E-07 | K | TRYDDVDLITII  |                                  |       |
| 1.10E-11 | R | TADLGGSSTTTA  |                                  |       |
| 1.50E-05 | K | TDGLFLQCCDI   |                                  |       |
| 7.50E-07 | R | TNSFLTWDNL    |                                  |       |
| 9.30E-05 | K | ATLFPGDGIGF   |                                  | emPAI |
| 0.00027  | K | VGAFSVLR      |                                  |       |
| 2.00E-07 | K | ALSSPVLAAVCY  |                                  |       |
| 3.60E-06 | R | TNIQMIGALCFA  |                                  |       |
| 1.10E-05 | R | AELPSCLPVLV   |                                  |       |
| 4.70E-07 | K | MDVFNTFIDLI   |                                  |       |
| 0.00011  | R | EYSLQALESFLI  |                                  |       |
| 2.40E-09 | R | LSSIILQLDD    |                                  | emPAI |
| 0.00019  | K | VPLILGIWGGK   |                                  |       |
| 6.90E-09 | R | GLAYDTSDDQ    |                                  |       |
| 3.30E-11 | R | VPIICTGNDFS   |                                  |       |
| 3.50E-13 | R | VQLAETYLSQ    |                                  | emPAI |
| 5.60E-07 | R | HNTLLEEQR     |                                  |       |
| 0.00032  | R | NNSLLSGIIDGS  |                                  |       |
| 0.0034   | R | QELFEQGLPFES  |                                  |       |
| 4.70E-10 | R | SFSVYNNPSACK  |                                  |       |
| 1.40E-05 | R | HIDPLWPSDH    |                                  |       |
| 1.80E-05 | R | SFLDFSTQDEEA  |                                  |       |
| 2.10E-06 | K | TESAHAHISNCL  |                                  | emPAI |
| 2.70E-05 | K | AGFAGDDAPRA   |                                  |       |
| 0.0066   | R | HTGVMVGMCD    |                                  |       |
| 5.70E-05 | R | AVFPSIVGRPRH  |                                  |       |
| 5.30E-07 | K | SEYDESGPSIVIK |                                  |       |
|          |   |               | Methyl (DE) 0.00000000001000.0   |       |

|          |   |                 |                                      |       |
|----------|---|-----------------|--------------------------------------|-------|
| 0.0079   | K | IWHHTFYNELIV    |                                      |       |
| 6.80E-11 | K | LAYVALDYEQFS    |                                      |       |
| 0.0046   | K | DLYGNIVLSGCM    |                                      |       |
| 3.50E-07 | R | TTGIVLDSGDC L   |                                      | emPAI |
| 0.0038   | K | STVVNTHLMP S    | Oxidation (M) 0.00000000200.0        |       |
| 1.30E-10 | K | AADQGLVILQ R    |                                      |       |
| 3.70E-10 | R | EDGEPVGYND K    |                                      |       |
| 7.80E-10 | K | VGEEVEILGLR E   |                                      |       |
| 7.30E-08 | R | GSALSALQGTI Q   |                                      |       |
| 2.30E-06 | R | HYAHVDCPGI N    |                                      |       |
| 0.00024  | K | VDVDDPELLIE     | Oxidation (M) 0.000000000000002000.0 |       |
| 0.0014   | R | VLDKPFLEMPIE G  |                                      | emPAI |
| 0.0037   | K | LVSGLIPDAGT A   |                                      |       |
| 2.20E-05 | K | IPLTLIYDDIK S   |                                      |       |
| 1.10E-05 | K | DFGSALWDM G     | Oxidation (M) 0.00000000200.0        |       |
| 2.30E-06 | K | FSLEETVAILH L   |                                      |       |
| 8.90E-05 | K | STYNDINPGM I    | Oxidation (M) 0.000000000200000.0    |       |
| 0.00044  | K | NPNPVPIPLID K   |                                      |       |
| 1.60E-05 | R | QAVDISPLR R     |                                      |       |
| 0.0015   | K | HATFVPHTAG Y    |                                      |       |
| 8.30E-09 | R | VNQAIFLTTG E    |                                      |       |
| 2.30E-09 | K | TIAECLADELIN G  |                                      |       |
| 4.10E-07 | R | HENVDIVVIR E    |                                      |       |
| 0.0002   | R | HLQFPSFADR L    |                                      |       |
| 1.40E-06 | K | YAFEYAYLNNF K   |                                      |       |
| 9.10E-09 | K | TPVGGGVSSLI K   |                                      |       |
| 0.0017   | K | NANPVALLSS H    |                                      |       |
| 0.00014  | R | TEDLGGNSTT(-    |                                      | emPAI |
| 0.00055  | R | LWGENFFDPA K    |                                      |       |
| 6.20E-09 | R | PMEEGLAEAI I    |                                      |       |
| 1.50E-06 | K | AYLPVVESFGF A   |                                      |       |
| 5.20E-05 | R | YRVENLYEGPI N   |                                      | emPAI |
| 0.00046  | K | AICTEAGLLALIE   |                                      |       |
| 2.80E-08 | R | TMLELLNQLD G    |                                      |       |
| 2.60E-09 | K | APLESYADIGG E   |                                      |       |
| 0.0018   | R | VADDLSPSIVF R   |                                      | emPAI |
| 0.0045   | K | AEIANVLSR G     |                                      |       |
| 0.0012   | K | TAIAEGLAQR I    |                                      |       |
| 3.20E-05 | R | HAQLPEEAR E     |                                      |       |
| 2.90E-07 | K | AIDLIDEAGSR V   |                                      |       |
| 2.50E-05 | R | VLENLGADPSI T   |                                      |       |
| 0.0012   | R | GSGFVAVEIPF A   |                                      |       |
| 2.70E-06 | K | VPEPTVEEAIQ E   |                                      |       |
| 0.0076   | R | LGHNFVGTQV V    |                                      | emPAI |
| 9.80E-05 | R | ALLIDLEPR V     |                                      |       |
| 0.0016   | R | VINGIQNGDYI N   |                                      |       |
| 8.40E-06 | R | DIIESLVDEYK A   |                                      |       |
| 5.70E-05 | K | GVEEEIMDMI E    |                                      |       |
| 5.50E-06 | K | YISILNIIQGEVI I |                                      |       |
| 0.00042  | R | LHLTNPTFAQ Y    |                                      | emPAI |
| 0.00066  | R | SLQLEATTQFR K   |                                      |       |
| 7.70E-05 | R | NATWTLSNFC G    |                                      |       |
| 2.80E-08 | R | EQAVWALGN C     |                                      |       |
| 1.30E-06 | K | VTGNTGDVNF I    |                                      |       |
| 0.0033   | K | VVIEHGAVPIF E   |                                      | emPAI |
| 1.20E-05 | R | VDEIITCAPR R    |                                      |       |
| 1.10E-05 | K | DSFLDEGFILDI K  |                                      |       |
| 4.10E-10 | K | VQDDEVGDG E     |                                      |       |

|            |                |                                      |       |
|------------|----------------|--------------------------------------|-------|
| 0.0037 R   | ALVAIPTTIADI A |                                      | emPAI |
| 2.70E-05 R | LLILTDP R T    |                                      |       |
| 9.30E-10 R | VIVAIENPQDII P |                                      |       |
| 0.00041 R  | HTPGTFTNQML    | Oxidation (M) 0.0000000020000000.0   |       |
| 8.10E-05 K | EGALGNIPIIAF F |                                      | emPAI |
| 4.60E-05 K | DAGVIAGLNV. I  |                                      |       |
| 0.0023 R   | FEELNNDLFR K   |                                      |       |
| 5.70E-06 R | ITPSWVGFTD L   |                                      |       |
| 0.0036 K   | VFSPEEISAMII M |                                      |       |
| 3.60E-08 R | VEIESLFDGVD A  |                                      | emPAI |
| 1.60E-05 K | GAGANILR A     |                                      |       |
| 1.20E-05 K | LQLIVFGK K     |                                      |       |
| 0.0079 K   | DEGFGSLWR G    |                                      |       |
| 0.00039 K  | LLIQNQDEMI A   | Oxidation (M) 0.00000000200.0        |       |
| 0.0041 R   | TIKDEGFGSLW G  |                                      |       |
| 0.00083 R  | YFPTQALNFAF D  |                                      |       |
| 2.70E-05 K | GFTNFALDFL T   | Oxidation (M) 0.000000000200000000.0 | emPAI |
| 2.70E-05 K | AGFAGDDAPR A   |                                      |       |
| 0.0021 R   | GYSFTTTAER E   |                                      |       |
| 0.0066 R   | HTGVMVGM C D   |                                      |       |
| 5.70E-05 R | AVFPSIVGRPR H  |                                      |       |
| 0.0079 K   | IWHHTFYNELIV   |                                      |       |
| 0.00023 K  | NYELPDGQVIT F  |                                      |       |
| 3.50E-07 R | TTGIVLDSGD C L |                                      | emPAI |
| 1.60E-05 K | GAGANILR A     |                                      |       |
| 1.20E-05 K | LQLIVFGK K     |                                      |       |
| 0.0016 R   | DEGIGSLWR G    |                                      |       |
| 4.70E-05 K | SSFDAFSQIVK K  |                                      |       |
| 0.00039 K  | LLIQNQDEMLI A  | Oxidation (M) 0.00000000200.0        |       |
| 0.0011 R   | TIRDEGIGSLW G  |                                      |       |
| 0.00083 R  | YFPTQALNFAF D  |                                      | emPAI |
| 2.50E-06 R | SSGFGDFGSDI S  |                                      |       |
| 0.0041 R   | SSFGGFGSNDI R  |                                      |       |
| 0.00053 K  | TLAFGIPIIDK I  |                                      |       |
| 0.0053 R   | FTELP SIAVER G |                                      |       |
| 0.0018 K   | CEALHGDISQ S E |                                      |       |
| 3.70E-07 K | LADGITTYSIIA A |                                      | emPAI |
| 0.0066 R   | HGDLLR T       |                                      |       |
| 1.60E-06 R | AQEFVCGLAQ I   |                                      |       |
| 2.20E-07 K | LLEIDPNGAVS K  |                                      |       |
| 0.0001 R   | TVQHLLIGSGM A  |                                      | emPAI |
| 4.60E-05 K | DAGVIAGLNV. I  |                                      |       |
| 0.0023 R   | FEELNNDLFR K   |                                      |       |
| 5.70E-06 R | ITPSWVGFTD L   |                                      |       |
| 0.0036 K   | VFSPEEISAMII M |                                      |       |
| 2.30E-07 R | VEIESLFDGVD A  |                                      | emPAI |
| 6.20E-10 K | SSTTTISDGSSI K |                                      |       |
| 3.60E-05 K | EGQVIGYLHQI L  |                                      |       |
| 0.00026 K  | LLSDDGDSVG' -  |                                      | emPAI |
| 0.0076 K   | IGLFGGAGVGIT   |                                      |       |
| 1.30E-05 R | VGLTGLTVAE\ D  |                                      |       |
| 8.60E-06 K | TVLIMELINNV A  |                                      |       |
| 1.10E-07 R | FTQANSEVSAI I  |                                      | emPAI |
| 0.00084 K  | TLFNELEVVEG L  |                                      |       |
| 5.30E-13 K | TPVYTIASNAG L  |                                      | emPAI |
| 0.00023 K  | TAAYGHFGR D    |                                      |       |
| 6.40E-07 K | ANVDYEQIVR K   |                                      |       |
| 1.40E-07 K | TNMVMVFGE A    |                                      | emPAI |

|          |   |                |                                    |       |
|----------|---|----------------|------------------------------------|-------|
| 0.0036   | K | GVLLYGPPGT     |                                    |       |
| 2.00E-06 | K | HGEIDYEAIK     |                                    |       |
| 0.0011   | R | AIASNIDANFLI   |                                    |       |
| 0.00061  | R | TLMELLNQLD     | Oxidation (M) 0.0020000000000000.0 |       |
| 1.30E-05 | R | EVDPPVYNMI     |                                    | emPAI |
| 3.00E-06 | K | YSQVVSNALD     |                                    |       |
| 1.30E-09 | R | AGELSAEIDN     |                                    | emPAI |
| 3.20E-10 | R | SPSSDLLSILQCS  |                                    |       |
| 8.30E-06 | R | FGDPSYGQLQ     |                                    | emPAI |
| 0.00011  | R | IAGLEVLRI      |                                    |       |
| 0.007    | R | TPVENSLRD      |                                    |       |
| 0.0015   | R | IPAVQDLVR      |                                    |       |
| 3.30E-08 | K | QFAAEEISAQV    |                                    |       |
| 4.00E-05 | R | QAVVNPENTFR    |                                    | emPAI |
| 0.0036   | K | GVLLYGPPGT     |                                    |       |
| 0.0037   | K | LAGPQLVQMF     |                                    |       |
| 0.0012   | K | DSYLIDTLPSE    |                                    |       |
| 1.20E-10 | R | TMLELLNQLD     | Methyl (DE) 0.0000000000000010.0   | emPAI |
| 0.00017  | K | ADLVNNLGTIS    |                                    |       |
| 0.00056  | R | ELISNSSDALDI   |                                    |       |
| 7.10E-08 | K | GIVDSEDPLNE    |                                    |       |
| 0.0013   | K | SGDELTSKDY     |                                    | emPAI |
| 8.60E-07 | R | GLCAIAQAESLY   |                                    |       |
| 5.80E-07 | R | ELAEDGYSGVIV   |                                    | emPAI |
| 5.60E-07 | R | LSGLVNNLISICE  |                                    |       |
| 1.60E-08 | R | LASFQNAPSVIQ   |                                    | emPAI |
| 0.00077  | R | ESAIAQIIRT     |                                    |       |
| 0.00036  | R | TCGPLLDVVAIE   |                                    |       |
| 2.20E-09 | K | VPYQGGAVEL     |                                    | emPAI |
| 0.0015   | K | VIEVEGPRG      |                                    |       |
| 0.00014  | K | FLDGIYVSEK     |                                    |       |
| 5.30E-06 | R | TALSHVDNLISG   |                                    |       |
| 0.00025  | R | FVYAHFPINAS    |                                    | emPAI |
| 0.00032  | R | EQPLFIIANWG    |                                    |       |
| 0.0006   | K | SLQFLPSIINASE  |                                    |       |
| 7.40E-05 | R | TVEYIPENSCDA   |                                    |       |
| 0.00012  | R | EDAFFLAVTELK   |                                    | emPAI |
| 1.40E-08 | R | SIVGATLEVIQIK  |                                    |       |
| 1.20E-05 | R | SDSQVFLFLNSC   |                                    | emPAI |
| 1.60E-08 | R | TGGGGLDLSSIR   |                                    |       |
| 0.00014  | K | AFEVLNSLEVVL   |                                    |       |
| 0.0022   | K | TLVMLEDFLNIE   | Oxidation (M) 0.0002000000000000.0 | emPAI |
| 0.0036   | K | GVLLYGPPGT     |                                    |       |
| 0.0055   | K | AVCTEAGMFAE    |                                    |       |
| 0.00021  | R | IDILDQALLRPI   |                                    |       |
| 4.80E-07 | R | TMLELLNQLD     |                                    | emPAI |
| 3.50E-06 | K | SGFEAATLIGLIL  |                                    |       |
| 1.50E-06 | K | VSSDFVDAALIC   |                                    | emPAI |
| 0.00011  | K | SLLEEYFSIRL    |                                    |       |
| 7.30E-08 | K | APNSFGFLGEV    |                                    | emPAI |
| 2.40E-07 | K | AGALGDSVTITIE  |                                    |       |
| 5.10E-05 | K | ITVTADGQFSKR   |                                    | emPAI |
| 5.00E-08 | K | SANGEDTQVMF    |                                    |       |
| 0.001    | R | NFFLFTPLLPSIS  |                                    | emPAI |
| 2.90E-07 | K | EIPSLQLINQTLIE |                                    |       |
| 0.00029  | R | QTAPDATYVYT    |                                    | emPAI |
| 1.50E-05 | K | EYVEALALLSTIE  |                                    |       |
| 0.00048  | R | HLSSLYDTLLECL  |                                    |       |

|          |   |              |    |                              |       |
|----------|---|--------------|----|------------------------------|-------|
| 8.20E-05 | R | VEIAHIAELIGL | K  |                              | emPAI |
| 1.70E-05 | R | AGQYGTVTSL   | 'D |                              |       |
| 7.50E-06 | K | THGYLAPIIDQ  | E  |                              | emPAI |
| 3.60E-06 | K | TPGPGAQSAL   | A  |                              |       |
| 9.50E-06 | R | IEDVTPIPTDST | R  |                              | emPAI |
| 5.80E-05 | R | APLGQNTVLLI  | G  |                              |       |
| 3.70E-07 | K | IAVLVGTITDD  | V  |                              | emPAI |
| 2.60E-05 | R | FLPLGLGLLYL  | Q  |                              |       |
| 4.80E-05 | R | AVPLALGLLCI  | V  |                              |       |
| 0.0083   | R | QNLAATFVNA   | L  |                              | emPAI |
| 2.10E-05 | R | DLVGVLEDAIF  | G  |                              |       |
| 3.30E-06 | K | VVAAGANPVL   | G  |                              | emPAI |
| 0.0039   | K | SFNAGQITSK   | L  |                              |       |
| 4.40E-07 | R | EGLVSDAIESFI | A  |                              | emPAI |
| 5.00E-05 | R | GGLVSILNLGL  | R  |                              |       |
| 1.00E-05 | R | DASYTTQPLEL  | K  |                              | emPAI |
| 4.60E-05 | R | TCYAQSSQIR   | Q  |                              |       |
| 1.20E-05 | K | ATQGIYPLQNI  | K  |                              | emPAI |
| 6.60E-05 | K | ILQLLR       | L  |                              |       |
| 8.80E-05 | K | LLFIIR       | I  |                              |       |
| 0.0003   | K | EANNFLWPFC   | A  |                              | emPAI |
| 4.00E-05 | K | SVAAGSATVA   | 'S |                              |       |
| 9.30E-05 | R | YGNATVVENT   | G  |                              | emPAI |
| 1.70E-06 | K | LAATCATAVE   | V  |                              |       |
| 0.0013   | K | TVLIPIAHGTE  | R  |                              | emPAI |
| 0.0054   | K | EAVDQCITANI  | M  |                              |       |
| 5.00E-05 | R | SYAELLQDLMI  | T  |                              |       |
| 0.00049  | K | GTSSILSEVFL  | H  |                              | emPAI |
| 0.0008   | K | DLPVMTFLIS   | A  |                              |       |
| 1.60E-05 | K | SGPLPVDTF    | F  |                              | emPAI |
| 0.0097   | K | VLSMAPGLER   | L  | Oxidation (M) 0.0002000000.0 |       |
| 3.40E-06 | R | SQDFLFISGTK  | M  |                              | emPAI |
| 0.00083  | K | AGALGDSVSIT  | E  |                              |       |
| 5.10E-05 | K | ITVTADGQFSK  | R  |                              | emPAI |
| 0.0033   | R | DIVELQLK     | Q  |                              |       |
| 0.00056  | K | SPMAGTFYR    | S  | Oxidation (M) 0.002000000.0  |       |
| 0.0025   | K | QLDCELVIR    | K  |                              | emPAI |
| 0.0024   | K | WAEIIGQAR    | Q  |                              |       |
| 4.50E-05 | K | FFALQVLEGI   | Y  |                              | emPAI |
| 0.0063   | R | ALAESAQDAF   | 'L |                              |       |
| 0.00026  | R | NQIQAYVFDV   | A  |                              | emPAI |
| 0.0036   | R | GVLLYGPPGT   | 'T |                              |       |
| 0.00026  | K | ENAPAIIFIDEV | F  |                              | emPAI |
| 0.0099   | R | EANPYSTAR    | L  |                              |       |
| 0.0021   | R | AYSPDFMFIW   | I  |                              | emPAI |
| 0.0069   | K | GIPYLNTYDGF  | T  |                              |       |
| 0.0013   | K | SRECLPLVLIIR | N  |                              | emPAI |





6.54

6.08

2.45

3.72

3.85



1.79

2.66

2.7

1.07

1.81

1.98

0.72

1.67

0.37

1.25

1.38

1.15

0.59

11.16

1.5

1.51

1.03

0.83

0.81

0.93

0.23

0.52

0.84

0.57  
0.26

0.37

0.66

0.24

0.77

0.13

0.17

0.55

0.36

0.18

0.27

0.46

0.09

0.68

0.45

0.27

0.14

0.4

0.09  
0.2

0.13

0.55

1.25

0.41

0.17

0.11

0.33  
0.03

0.23

0.45  
0.12

0.4

0.21

0.31

0.96

0.05

8.95



6.51

6.85

5.98

5.98

5.11

5.55

2.31

0.13

1.79

2.92

0.21

2.53

0.68

2.24

3.28

0.98

3.03

2.61

2.2

1.96

0.82

1.81

1.59

1.76

2.18

2.8

2.81

0.74

1.46

1.21

0.23

0.5

0.47

0.97

0.61

1.07

0.65

0.52

0.51

1.68

1.25

8.22

0.32

0.85

1.85

0.86

0.35

0.29

0.51

0.44

0.52

0.61

0.95

2.17

1.1

0.6

1.39

0.34

2.86

0.44

0.58

0.47

1.21

0.22

0.78

0.52

0.51

0.33

0.38

0.79

0.55

0.79

1.17

0.67

0.14

0.16

0.29

0.15

0.46

0.61

0.36

0.7

0.07

0.49

0.58

0.55

0.27

0.61

0.59

0.31

0.69

0.42

0.3

0.23

0.39

0.5

0.2

0.05

0.82

0.37

0.19

0.27

0.22

0.15

0.17

0.23

0.06

1.11  
0.39

0.1

0.7

0.6

0.28

0.08

0.07

0.1

0.42

0.38

0.34

0.54

0.12

0.46

0.05

0.49

0.25

0.54

0.13

0.53

0.83

0.16

0.26

0.06

0.32

0.26

0.14

0.27

0.41

0.94

0.15

0.22

0.31

0.72

0.47

0.06

0.05

0.1

0.03

0.07

0.18

0.03

0.16

0.02

12.46

10.29

12.59

11.81

11.88



6.42

4.73

4.75

4.8

3.1



4.28

2.6

4.06

2.04

0.76

1.29

0.81

2.84

1.16

1.81

1.46

0.09

0.14

1.58

0.9

0.48

0.9

0.72

1.62

0.47

1.31

1.9

0.58

0.96

0.38

0.44

0.45

0.85

1.06

1.31

2.23

0.96

1.02

15.06

0.15

0.78

0.09

0.19

1.41

0.39

0.5

0.45

0.34

0.67

0.6

0.51

0.28

0.39

0.66

0.46

0.2

0.36

0.23

0.33

0.58

0.61

0.26

0.14

0.96

0.29

0.54

0.91

0.12

0.26

0.27

0.19

1.07

0.11

0.23

0.17

0.23

0.49

0.13

0.14

1.91

0.19

0.18

0.31

0.1

0.6

0.29

0.13

0.12

4.77

3.4

2.17

3.42

2.45

3.4

1.98

2.21

2

0.98

1.35

1.68

1.44

11.16

1.07

1.27

1.42

1.83

1.31

0.94

0.52

0.52

0.81

0.2

0.26

0.14

0.78

0.5

0.45

0.95

1.17

0.58

0.18

0.36

0.3

0.41

0.29

0.3

0.45

0.23

0.67

0.32

0.1

0.03
