# Supplementary material for: Late Embryogenesis Abundant (LEA)5 Regulates Translation in Mitochondria and Chloroplasts to Enhance Growth and Stress Tolerance
Source: PubMed Central journal article supplement (PMC9244843; doi:10.3389/fpls.2022.875799), 2022-06-16
Supplement: Table_2.pdf [file Table_2.pdf]

**Supplemental Table S2.** Sequences used for PCR analysis

| Oligo                        | Forward sequence                                                         | Reverse sequence                                                       |
|------------------------------|--------------------------------------------------------------------------|------------------------------------------------------------------------|
| RH22-attB<br>(Cloning)       | 5'-GGGGACAAGTTTGTACAAA<br>AAAGCAGGCTCCACCATGATTC<br>TCTCACGCTCTGTCTCC-3' | 5'- GGGGACCACTTTGTA<br>CAAGAAAGCTGGGTC ATA<br>TCTCACAGCTTGAGGCTCCTC-3' |
| LEA5-attB1<br>(Cloning)      | 5'- GGGGACAAGTTTGTACAAA<br>AAAGCAGGCTCCACCATGGCTC<br>GTTCTATCTCTAACG-3'  | 5'- GGGGACCACTTTGTACAAGAAA<br>GCTGGGTCCTGCTTGTGTTCAAGA<br>GAGCTGC -3'  |
| 23S-4.5S probe<br>(Northern) | 5'-TTCAGAACGTCGTGAGACA<br>GTTCCGGTC-3'                                   | 5'-CAAATCGTTCGTTGTTAGGATGCCTC-3'                                       |
| LEA5 (qPCR)                  | 5'-GTTTCGAGCGGTGGAAGAAGT-3'                                              | 5'- GTAGCTCAGCCGCGTCAATCT-3'                                           |
| Actin 11 (qPCR)              | 5'- CGACAATGGAACCGGAATG-3'                                               | 5'-CCCTTGGCGCATCATCTC-3'                                               |
